# Supplementary material
Source: PubMed Central journal article supplement (PMC3422843)
Supplement: amiajnl-2012-000852-s1.pdf [file amiajnl-2012-000852-s1.pdf]

"medication\_definition\_id"|"medication"|"problem\_definition\_id"|"problem"|"patient\_link\_frequency"|"link\_ratio"  
"70"|"Albuterol Sulfate (5 MG/ML) 0.5% Inhalation Nebulization Solution"|"64181"|"Asthma"|"6"|"0.6"  
"70"|"Albuterol Sulfate (5 MG/ML) 0.5% Inhalation Nebulization Solution"|"64205"|"Chronic Obstructive Pulmonary  
Disease"|"3"|"0.428571"  
"72"|"Albuterol Sulfate 2 MG/5ML Oral Syrup"|"77891"|"Acute Upper Respiratory Infection"|"2"|"0.666667"  
"144"|"Amoxicillin 250 MG Oral Tablet Chewable"|"62365"|"Acute Nonsuppurative Otitis Media"|"2"|"1"  
"144"|"Amoxicillin 250 MG Oral Tablet Chewable"|"251528"|"Acute Otitis Media"|"2"|"1"  
"147"|"Amoxicillin 500 MG Oral Capsule"|"62350"|"Acute Serous Otitis Media"|"2"|"0.4"  
"147"|"Amoxicillin 500 MG Oral Capsule"|"62577"|"Sinusitis"|"5"|"0.277778"  
"147"|"Amoxicillin 500 MG Oral Capsule"|"62578"|"Acute Sinusitis"|"21"|"0.428571"  
"147"|"Amoxicillin 500 MG Oral Capsule"|"62580"|"Acute Maxillary Sinusitis"|"5"|"0.714286"  
"147"|"Amoxicillin 500 MG Oral Capsule"|"62582"|"Acute Ethmoidal Sinusitis"|"2"|"0.666667"  
"147"|"Amoxicillin 500 MG Oral Capsule"|"62733"|"Acute Tonsillitis"|"2"|"0.5"  
"147"|"Amoxicillin 500 MG Oral Capsule"|"62760"|"Acute Pharyngitis"|"10"|"0.47619"  
"147"|"Amoxicillin 500 MG Oral Capsule"|"64118"|"Acute Bronchitis"|"3"|"0.111111"  
"147"|"Amoxicillin 500 MG Oral Capsule"|"64680"|"Chronic Reflux Esophagitis"|"2"|"0.25"  
"147"|"Amoxicillin 500 MG Oral Capsule"|"64764"|"Gastritis Due To H. Pylori"|"3"|"0.375"  
"147"|"Amoxicillin 500 MG Oral Capsule"|"65762"|"Urinary Tract Infection"|"44"|"0.586667"  
"147"|"Amoxicillin 500 MG Oral Capsule"|"76976"|"Helicobacter Pylori (H. Pylori) Infection"|"2"|"1"  
"147"|"Amoxicillin 500 MG Oral Capsule"|"77890"|"Upper Respiratory Infection"|"7"|"0.2"  
"147"|"Amoxicillin 500 MG Oral Capsule"|"77891"|"Acute Upper Respiratory Infection"|"10"|"0.185185"  
"147"|"Amoxicillin 500 MG Oral Capsule"|"196605"|"Rapid Bacterial Antigen Ident Kit Streptococcus Group  
B"|"4"|"1"  
"147"|"Amoxicillin 500 MG Oral Capsule"|"251528"|"Acute Otitis Media"|"6"|"0.352941"  
"147"|"Amoxicillin 500 MG Oral Capsule"|"251575"|"Streptococcal Sore Throat"|"5"|"0.833333"  
"147"|"Amoxicillin 500 MG Oral Capsule"|"274516"|"Acute Pharyngitis Streptococcus"|"6"|"0.6"  
"147"|"Amoxicillin 500 MG Oral Capsule"|"274534"|"Acute Sore Throat"|"3"|"0.75"  
"247"|"Atenolol 100 MG Oral Tablet"|"62975"|"Coronary Artery Disease"|"8"|"0.170213"  
"247"|"Atenolol 100 MG Oral Tablet"|"63467"|"Hypertension"|"44"|"0.346457"  
"247"|"Atenolol 100 MG Oral Tablet"|"63468"|"Essential Hypertension"|"26"|"0.541667"  
"247"|"Atenolol 100 MG Oral Tablet"|"63470"|"Benign Essential Hypertension"|"25"|"0.581395"  
"250"|"Atenolol 50 MG Oral Tablet"|"60853"|"Chest Pain Or Discomfort"|"2"|"0.222222"  
"250"|"Atenolol 50 MG Oral Tablet"|"62916"|"Atrial Fibrillation"|"9"|"0.219512"  
"250"|"Atenolol 50 MG Oral Tablet"|"62926"|"Premature Ventricular Contractions"|"2"|"0.25"  
"250"|"Atenolol 50 MG Oral Tablet"|"62975"|"Coronary Artery Disease"|"22"|"0.128655"  
"250"|"Atenolol 50 MG Oral Tablet"|"63148"|"2-vessel Coronary Artery Stenosis"|"2"|"0.222222"  
"250"|"Atenolol 50 MG Oral Tablet"|"63467"|"Hypertension"|"131"|"0.371105"  
"250"|"Atenolol 50 MG Oral Tablet"|"63468"|"Essential Hypertension"|"90"|"0.545455"  
"250"|"Atenolol 50 MG Oral Tablet"|"63470"|"Benign Essential Hypertension"|"73"|"0.544776"  
"250"|"Atenolol 50 MG Oral Tablet"|"70472"|"Systemic Lupus Erythematosus"|"2"|"0.285714"  
"250"|"Atenolol 50 MG Oral Tablet"|"282270"|"Palpitations"|"5"|"0.16129"  
"253"|"Ativan 1 MG Oral Tablet"|"76307"|"Bipolar Disorder"|"2"|"0.5"  
"274"|"Augmentin 500-125 MG Oral Tablet"|"65762"|"Urinary Tract Infection"|"2"|"0.666667"  
"308"|"Bactrim DS 800-160 MG Oral Tablet"|"65762"|"Urinary Tract Infection"|"3"|"0.6"  
"808"|"Coumadin 5 MG Oral Tablet"|"62916"|"Atrial Fibrillation"|"8"|"0.190476"  
"1103"|"Diltiazem HCl 30 MG Oral Tablet"|"63468"|"Essential Hypertension"|"3"|"0.6"  
"1103"|"Diltiazem HCl 30 MG Oral Tablet"|"63470"|"Benign Essential Hypertension"|"2"|"0.4"  
"1104"|"Diltiazem HCl 60 MG Oral Tablet"|"63468"|"Essential Hypertension"|"2"|"0.4"  
"1104"|"Diltiazem HCl 60 MG Oral Tablet"|"63470"|"Benign Essential Hypertension"|"2"|"0.666667"  
"1186"|"Doxycycline Hyclate 100 MG Oral Capsule"|"60928"|"Pain During Urination (Dysuria)"|"4"|"0.333333"  
"1186"|"Doxycycline Hyclate 100 MG Oral Capsule"|"62588"|"Chronic Ethmoidal Sinusitis"|"13"|"0.722222"  
"1186"|"Doxycycline Hyclate 100 MG Oral Capsule"|"64205"|"Chronic Obstructive Pulmonary  
Disease"|"2"|"0.285714"

"1186""Doxycycline Hyclate 100 MG Oral Capsule""64223""Bronchiectasis""2""0.666667"  
"1186""Doxycycline Hyclate 100 MG Oral Capsule""65831""Prostatitis""2""0.4"  
"1186""Doxycycline Hyclate 100 MG Oral Capsule""65847""Urethritis""2""0.5"  
"1186""Doxycycline Hyclate 100 MG Oral Capsule""65848""Chlamydia Trachomatis Urethritis""3""1"  
"1186""Doxycycline Hyclate 100 MG Oral Capsule""66015""Ovarian Disorders""2""1"  
"1186""Doxycycline Hyclate 100 MG Oral Capsule""66091""Endometriosis Of The Pelvic Peritoneum""2""0.5"  
"1186""Doxycycline Hyclate 100 MG Oral Capsule""66143""Metrorrhagia""2""0.4"  
"1186""Doxycycline Hyclate 100 MG Oral Capsule""66176""Cervical Stenosis/Stricture""2""0.5"  
"1186""Doxycycline Hyclate 100 MG Oral Capsule""66179""Cervicitis""12""0.857143"  
"1186""Doxycycline Hyclate 100 MG Oral Capsule""66213""Vaginitis""2""0.2"  
"1186""Doxycycline Hyclate 100 MG Oral Capsule""66274""Female Infertility""9""0.692308"  
"1186""Doxycycline Hyclate 100 MG Oral Capsule""69606""Acne""13""0.464286"  
"1186""Doxycycline Hyclate 100 MG Oral Capsule""69607""Acne Vulgaris""5""0.833333"  
"1186""Doxycycline Hyclate 100 MG Oral Capsule""69913""Rosacea""5""0.714286"  
"1186""Doxycycline Hyclate 100 MG Oral Capsule""70016""Cellulitis Of The Leg""2""0.666667"  
"1186""Doxycycline Hyclate 100 MG Oral Capsule""70027""Folliculitis""4""0.266667"  
"1186""Doxycycline Hyclate 100 MG Oral Capsule""76934""Chlamydial Infections""2""0.5"  
"1186""Doxycycline Hyclate 100 MG Oral Capsule""77872""Pelvic Inflammatory Disease""3""0.6"  
"1190""Doxycycline Hyclate 50 MG Oral Capsule""69606""Acne""3""0.6"  
"1341""Erythromycin Ethylsuccinate 400 MG Oral Tablet""62760""Acute Pharyngitis""2""1"  
"1360""EryPed 200 200 MG/5ML Oral Suspension Reconstituted""60895""Vomiting (Symptom)""2""0.285714"  
"1360""EryPed 200 200 MG/5ML Oral Suspension Reconstituted""64688""Esophageal Reflux""9""0.391304"  
"1360""EryPed 200 200 MG/5ML Oral Suspension Reconstituted""64748""Gastroparesis""13""1"  
"1861""Ibuprofen 600 MG Oral Tablet""31947""Lumbago""7""0.538462"  
"1861""Ibuprofen 600 MG Oral Tablet""60828""Headache""6""0.133333"  
"1861""Ibuprofen 600 MG Oral Tablet""60844""Tooth Pain""2""0.5"  
"1861""Ibuprofen 600 MG Oral Tablet""60899""Abdominal Pain""7""0.184211"  
"1861""Ibuprofen 600 MG Oral Tablet""61070""Tingling (Paresthesia)""2""0.333333"  
"1861""Ibuprofen 600 MG Oral Tablet""62984""Atypical Chest Pain""3""0.136364"  
"1861""Ibuprofen 600 MG Oral Tablet""63912""Varicose Veins With Inflammation""13""0.433333"  
"1861""Ibuprofen 600 MG Oral Tablet""63914""Varicose Veins With Ulcer And Inflammation""2""0.5"  
"1861""Ibuprofen 600 MG Oral Tablet""64046""Thrombophlebitis Of Superficial Veins Of Upper  
Extremities""2""1"  
"1861""Ibuprofen 600 MG Oral Tablet""64501""Pleurisy""2""0.666667"  
"1861""Ibuprofen 600 MG Oral Tablet""66133""Dysmenorrhea""3""0.333333"  
"1861""Ibuprofen 600 MG Oral Tablet""70027""Folliculitis""2""0.2"  
"1861""Ibuprofen 600 MG Oral Tablet""70219""Osteoarthritis Of The Knee""2""0.25"  
"1861""Ibuprofen 600 MG Oral Tablet""70455""Rheumatoid Arthritis""6""0.375"  
"1861""Ibuprofen 600 MG Oral Tablet""70472""Systemic Lupus Erythematosus""3""0.272727"  
"1861""Ibuprofen 600 MG Oral Tablet""70505""Plantar Fasciitis""3""0.428571"  
"1861""Ibuprofen 600 MG Oral Tablet""70549""Costochondritis (Tietze's Syndrome)""8""0.470588"  
"1861""Ibuprofen 600 MG Oral Tablet""73400""Sprain""3""0.6"  
"1861""Ibuprofen 600 MG Oral Tablet""73464""Lower Back Sprain""3""0.428571"  
"1861""Ibuprofen 600 MG Oral Tablet""73493""Ankle Sprain""2""0.25"  
"1861""Ibuprofen 600 MG Oral Tablet""73599""Trochanteric Bursitis""2""0.333333"  
"1861""Ibuprofen 600 MG Oral Tablet""73666""Backache""6""0.272727"  
"1861""Ibuprofen 600 MG Oral Tablet""74315""Carpal Tunnel Syndrome""3""0.230769"  
"1861""Ibuprofen 600 MG Oral Tablet""75717""Cervicalgia""7""0.388889"  
"1861""Ibuprofen 600 MG Oral Tablet""75811""Muscle Spasm""6""0.25"  
"1861""Ibuprofen 600 MG Oral Tablet""76835""HIV Infection""2""0.2"  
"1861""Ibuprofen 600 MG Oral Tablet""77891""Acute Upper Respiratory Infection""8""0.129032"  
"1861""Ibuprofen 600 MG Oral Tablet""85614""Joint Pain, Localized In The Hip""4""0.363636"  
"1861""Ibuprofen 600 MG Oral Tablet""85623""Joint Pain, Localized In The Knee""14""0.325581"  
"1861""Ibuprofen 600 MG Oral Tablet""85638""Ankle Joint Pain""3""0.214286"

"1861""Ibuprofen 600 MG Oral Tablet""85644""Foot Pain (Soft Tissue)""2""0.2"  
"1861""Ibuprofen 600 MG Oral Tablet""85658""Diffuse Joint Pains (Arthralgias)""3""1"  
"1861""Ibuprofen 600 MG Oral Tablet""85673""Joint Pain, Localized In The Wrist""2""0.333333"  
"1861""Ibuprofen 600 MG Oral Tablet""85691""Neck Pain""2""0.5"  
"1861""Ibuprofen 600 MG Oral Tablet""87739""Abdominal Pain In The Right Lower Belly (RLQ)""3""0.75"  
"1861""Ibuprofen 600 MG Oral Tablet""88058""Severe Menstrual Pain (Dysmenorrhea)""3""1"  
"1861""Ibuprofen 600 MG Oral Tablet""91056""Upper Back Pain (Between Shoulder Blades)""2""0.4"  
"1861""Ibuprofen 600 MG Oral Tablet""91079""Midback Pain""3""0.75"  
"1861""Ibuprofen 600 MG Oral Tablet""91089""Lower Back Pain""31""0.62"  
"1861""Ibuprofen 600 MG Oral Tablet""115846""Back Muscle Spasm""3""0.375"  
"1861""Ibuprofen 600 MG Oral Tablet""172080""Neck Strain""4""0.4"  
"1861""Ibuprofen 600 MG Oral Tablet""172081""Shoulder Strain""3""0.75"  
"1861""Ibuprofen 600 MG Oral Tablet""172085""Thoracic Strain""3""1"  
"1861""Ibuprofen 600 MG Oral Tablet""172086""Lumbar Strain""2""0.5"  
"1861""Ibuprofen 600 MG Oral Tablet""250903""Varicose Veins With Pain""8""0.222222"  
"1861""Ibuprofen 600 MG Oral Tablet""250924""Varicose Veins With Swelling""3""0.125"  
"1861""Ibuprofen 600 MG Oral Tablet""251190""Groin (Inguinal) Pain Right Side""2""0.666667"  
"1861""Ibuprofen 600 MG Oral Tablet""251191""Groin (Inguinal) Pain Left Side""2""1"  
"1861""Ibuprofen 600 MG Oral Tablet""251261""Pelvic Pain""3""0.75"  
"1861""Ibuprofen 600 MG Oral Tablet""251467""Limb Pain""5""0.192308"  
"1861""Ibuprofen 600 MG Oral Tablet""252496""Female Pelvic Pain""2""0.333333"  
"1861""Ibuprofen 600 MG Oral Tablet""257996""Arthritis""4""0.133333"  
"1861""Ibuprofen 600 MG Oral Tablet""278685""Arthralgias In Multiple Sites""2""0.285714"  
"1861""Ibuprofen 600 MG Oral Tablet""282272""Anterior Wall Chest Pain With Respiration""2""0.666667"  
"1861""Ibuprofen 600 MG Oral Tablet""282672""Venous Insufficiency""5""0.3125"  
"1861""Ibuprofen 600 MG Oral Tablet""298909""Strained Pectoralis Major Muscle""2""1"  
"1861""Ibuprofen 600 MG Oral Tablet""298920""Right Back Strain""3""1"  
"1861""Ibuprofen 600 MG Oral Tablet""298955""Multiple Muscle Strains""3""1"  
"1862""Ibuprofen 800 MG Oral Tablet""31947""Lumbago""12""0.324324"  
"1862""Ibuprofen 800 MG Oral Tablet""60828""Headache""15""0.211268"  
"1862""Ibuprofen 800 MG Oral Tablet""60844""Tooth Pain""2""0.25"  
"1862""Ibuprofen 800 MG Oral Tablet""60899""Abdominal Pain""8""0.173913"  
"1862""Ibuprofen 800 MG Oral Tablet""64501""Pleurisy""2""0.4"  
"1862""Ibuprofen 800 MG Oral Tablet""66070""Menorrhagia""4""0.2"  
"1862""Ibuprofen 800 MG Oral Tablet""66133""Dysmenorrhea""12""0.631579"  
"1862""Ibuprofen 800 MG Oral Tablet""70146""Osteoarthritis""7""0.318182"  
"1862""Ibuprofen 800 MG Oral Tablet""70455""Rheumatoid Arthritis""8""0.444444"  
"1862""Ibuprofen 800 MG Oral Tablet""70505""Plantar Fasciitis""4""0.363636"  
"1862""Ibuprofen 800 MG Oral Tablet""73403""Neck Sprain""3""0.375"  
"1862""Ibuprofen 800 MG Oral Tablet""73421""Elbow Sprain""2""1"  
"1862""Ibuprofen 800 MG Oral Tablet""73431""Wrist Sprain""2""0.4"  
"1862""Ibuprofen 800 MG Oral Tablet""73464""Lower Back Sprain""3""0.3"  
"1862""Ibuprofen 800 MG Oral Tablet""73474""Knee Sprain""3""0.5"  
"1862""Ibuprofen 800 MG Oral Tablet""73493""Ankle Sprain""6""0.272727"  
"1862""Ibuprofen 800 MG Oral Tablet""73551""Tendonitis""4""0.363636"  
"1862""Ibuprofen 800 MG Oral Tablet""73556""Rotator Cuff Tendonitis""5""0.5"  
"1862""Ibuprofen 800 MG Oral Tablet""73564""Lateral Epicondylitis""2""0.333333"  
"1862""Ibuprofen 800 MG Oral Tablet""73599""Trochanteric Bursitis""2""0.4"  
"1862""Ibuprofen 800 MG Oral Tablet""73608""Subacromial Bursitis""2""0.666667"  
"1862""Ibuprofen 800 MG Oral Tablet""73666""Backache""9""0.15"  
"1862""Ibuprofen 800 MG Oral Tablet""74315""Carpal Tunnel Syndrome""3""0.1875"  
"1862""Ibuprofen 800 MG Oral Tablet""75717""Cervicalgia""11""0.255814"  
"1862""Ibuprofen 800 MG Oral Tablet""75728""Sciatica""5""0.294118"  
"1862""Ibuprofen 800 MG Oral Tablet""75811""Muscle Spasm""4""0.129032"

"1862""Ibuprofen 800 MG Oral Tablet""75812""Myalgia And Myositis""4""0.25"  
"1862""Ibuprofen 800 MG Oral Tablet""80664""Leiomyoma Of The Uterus""3""0.2"  
"1862""Ibuprofen 800 MG Oral Tablet""81508""Contusion Of The Knee With Intact Skin Surface""2""1"  
"1862""Ibuprofen 800 MG Oral Tablet""81582""Muscle Hematoma""2""1"  
"1862""Ibuprofen 800 MG Oral Tablet""85614""Joint Pain, Localized In The Hip""6""0.193548"  
"1862""Ibuprofen 800 MG Oral Tablet""85619""Pain In The Thigh""2""0.5"  
"1862""Ibuprofen 800 MG Oral Tablet""85623""Joint Pain, Localized In The Knee""25""0.316456"  
"1862""Ibuprofen 800 MG Oral Tablet""85633""Pain In The Leg (Below The Knee)""3""0.272727"  
"1862""Ibuprofen 800 MG Oral Tablet""85644""Foot Pain (Soft Tissue)""7""0.25"  
"1862""Ibuprofen 800 MG Oral Tablet""85691""Neck Pain""4""0.235294"  
"1862""Ibuprofen 800 MG Oral Tablet""85701""Joint Pain, Localized In The Shoulder""9""0.225"  
"1862""Ibuprofen 800 MG Oral Tablet""87251""Breast Pain""2""0.25"  
"1862""Ibuprofen 800 MG Oral Tablet""90952""Joint Pain, Localized In The Left Shoulder""3""0.6"  
"1862""Ibuprofen 800 MG Oral Tablet""91056""Upper Back Pain (Between Shoulder Blades)""4""0.444444"  
"1862""Ibuprofen 800 MG Oral Tablet""91079""Midback Pain""4""0.444444"  
"1862""Ibuprofen 800 MG Oral Tablet""91089""Lower Back Pain""52""0.495238"  
"1862""Ibuprofen 800 MG Oral Tablet""115846""Back Muscle Spasm""6""0.352941"  
"1862""Ibuprofen 800 MG Oral Tablet""154781""Knee Pain Elicited By Motion""2""0.666667"  
"1862""Ibuprofen 800 MG Oral Tablet""172080""Neck Strain""4""0.571429"  
"1862""Ibuprofen 800 MG Oral Tablet""172081""Shoulder Strain""2""0.5"  
"1862""Ibuprofen 800 MG Oral Tablet""172086""Lumbar Strain""7""0.4375"  
"1862""Ibuprofen 800 MG Oral Tablet""173419""Cervical Radiculopathy""3""0.142857"  
"1862""Ibuprofen 800 MG Oral Tablet""173442""Lumbar Radiculopathy""4""0.285714"  
"1862""Ibuprofen 800 MG Oral Tablet""187800""Gynecologic Services Intrauterine Device (IUD) Insertion""2""0.333333"  
"1862""Ibuprofen 800 MG Oral Tablet""251467""Limb Pain""5""0.142857"  
"1862""Ibuprofen 800 MG Oral Tablet""259187""Internal Derangement Of Knee""2""0.25"  
"1862""Ibuprofen 800 MG Oral Tablet""278685""Arthralgias In Multiple Sites""3""0.375"  
"1862""Ibuprofen 800 MG Oral Tablet""278688""Trapezoid Muscle Strain""3""0.5"  
"1862""Ibuprofen 800 MG Oral Tablet""278689""Cervical Facet Syndrome""4""0.5"  
"1862""Ibuprofen 800 MG Oral Tablet""288921""Chronic Pain""3""0.3"  
"1862""Ibuprofen 800 MG Oral Tablet""293541""New Daily Persistent Headache""5""0.833333"  
"2107""Lasix 20 MG Oral Tablet""63470""Benign Essential Hypertension""3""0.214286"  
"2713""Naproxen 250 MG Oral Tablet""60828""Headache""2""0.285714"  
"2713""Naproxen 250 MG Oral Tablet""66070""Menorrhagia""2""0.5"  
"2713""Naproxen 250 MG Oral Tablet""70146""Osteoarthritis""2""0.285714"  
"2713""Naproxen 250 MG Oral Tablet""70219""Osteoarthritis Of The Knee""3""0.6"  
"2713""Naproxen 250 MG Oral Tablet""70455""Rheumatoid Arthritis""3""0.6"  
"2713""Naproxen 250 MG Oral Tablet""75717""Cervicalgia""2""0.25"  
"2713""Naproxen 250 MG Oral Tablet""75812""Myalgia And Myositis""3""0.6"  
"2713""Naproxen 250 MG Oral Tablet""85623""Joint Pain, Localized In The Knee""2""0.222222"  
"2713""Naproxen 250 MG Oral Tablet""91089""Lower Back Pain""3""0.428571"  
"2713""Naproxen 250 MG Oral Tablet""172083""Left Shoulder Strain""2""1"  
"2713""Naproxen 250 MG Oral Tablet""251261""Pelvic Pain""2""0.666667"  
"2713""Naproxen 250 MG Oral Tablet""251467""Limb Pain""5""0.714286"  
"2713""Naproxen 250 MG Oral Tablet""257996""Arthritis""3""0.375"  
"2716""Naproxen 500 MG Oral Tablet""31947""Lumbago""9""0.3"  
"2716""Naproxen 500 MG Oral Tablet""60828""Headache""21""0.225806"  
"2716""Naproxen 500 MG Oral Tablet""60846""TMJ Pain""2""0.285714"  
"2716""Naproxen 500 MG Oral Tablet""66070""Menorrhagia""3""0.130435"  
"2716""Naproxen 500 MG Oral Tablet""66133""Dysmenorrhea""8""0.444444"  
"2716""Naproxen 500 MG Oral Tablet""70146""Osteoarthritis""17""0.34"  
"2716""Naproxen 500 MG Oral Tablet""70148""Localized Primary Osteoarthritis""3""0.75"  
"2716""Naproxen 500 MG Oral Tablet""70166""Localized Primary Osteoarthritis Of The Knee""4""0.666667"

"2716""Naproxen 500 MG Oral Tablet""70191""Localized Osteoarthritis Of The Hand""3""0.75"  
"2716""Naproxen 500 MG Oral Tablet""70193""Localized Osteoarthritis Of The Knee""4""0.4"  
"2716""Naproxen 500 MG Oral Tablet""70196""Generalized Osteoarthritis""3""0.5"  
"2716""Naproxen 500 MG Oral Tablet""70219""Osteoarthritis Of The Knee""9""0.428571"  
"2716""Naproxen 500 MG Oral Tablet""70221""Osteoarthritis Of Multiple Sites""2""0.666667"  
"2716""Naproxen 500 MG Oral Tablet""70384""Gout""9""0.264706"  
"2716""Naproxen 500 MG Oral Tablet""70386""Acute Gout""2""0.5"  
"2716""Naproxen 500 MG Oral Tablet""70455""Rheumatoid Arthritis""56""0.682927"  
"2716""Naproxen 500 MG Oral Tablet""70472""Systemic Lupus Erythematosus""6""0.461538"  
"2716""Naproxen 500 MG Oral Tablet""70478""Sjogren's Syndrome""2""0.285714"  
"2716""Naproxen 500 MG Oral Tablet""70500""Polymyalgia Rheumatica""2""0.25"  
"2716""Naproxen 500 MG Oral Tablet""70549""Costochondritis (Tietze's Syndrome)""8""0.333333"  
"2716""Naproxen 500 MG Oral Tablet""70706""Ankylosing Spondylitis""10""0.714286"  
"2716""Naproxen 500 MG Oral Tablet""70719""Psoriatic Arthropathy""9""0.9"  
"2716""Naproxen 500 MG Oral Tablet""70722""Spondylitis""2""0.666667"  
"2716""Naproxen 500 MG Oral Tablet""73464""Lower Back Sprain""3""0.333333"  
"2716""Naproxen 500 MG Oral Tablet""73493""Ankle Sprain""3""0.214286"  
"2716""Naproxen 500 MG Oral Tablet""73549""Unspecified Muscle Strain""4""1"  
"2716""Naproxen 500 MG Oral Tablet""73551""Tendonitis""8""0.347826"  
"2716""Naproxen 500 MG Oral Tablet""73556""Rotator Cuff Tendonitis""3""0.428571"  
"2716""Naproxen 500 MG Oral Tablet""73578""Tendonitis Of The Achilles Tendon""2""0.5"  
"2716""Naproxen 500 MG Oral Tablet""73597""Bursitis""2""0.4"  
"2716""Naproxen 500 MG Oral Tablet""73607""Anserine Bursitis""2""0.666667"  
"2716""Naproxen 500 MG Oral Tablet""73626""Metatarsalgia""2""1"  
"2716""Naproxen 500 MG Oral Tablet""73631""De Quervain's Tenosynovitis""2""0.5"  
"2716""Naproxen 500 MG Oral Tablet""73666""Backache""24""0.252632"  
"2716""Naproxen 500 MG Oral Tablet""73919""Bunion""2""0.285714"  
"2716""Naproxen 500 MG Oral Tablet""74530""Tension-type Headache""4""0.166667"  
"2716""Naproxen 500 MG Oral Tablet""74537""Common Migraine (Without Aura)""5""0.333333"  
"2716""Naproxen 500 MG Oral Tablet""74552""Cluster Headache""3""0.75"  
"2716""Naproxen 500 MG Oral Tablet""75717""Cervicalgia""14""0.28"  
"2716""Naproxen 500 MG Oral Tablet""75728""Sciatica""6""0.375"  
"2716""Naproxen 500 MG Oral Tablet""75811""Muscle Spasm""16""0.333333"  
"2716""Naproxen 500 MG Oral Tablet""75812""Myalgia And Myositis""5""0.147059"  
"2716""Naproxen 500 MG Oral Tablet""83233""Shoulder Injury""2""0.5"  
"2716""Naproxen 500 MG Oral Tablet""85614""Joint Pain, Localized In The Hip""15""0.333333"  
"2716""Naproxen 500 MG Oral Tablet""85623""Joint Pain, Localized In The Knee""41""0.315385"  
"2716""Naproxen 500 MG Oral Tablet""85625""Joint Stiffness Of The Knee""2""0.5"  
"2716""Naproxen 500 MG Oral Tablet""85633""Pain In The Leg (Below The Knee)""3""0.214286"  
"2716""Naproxen 500 MG Oral Tablet""85638""Ankle Joint Pain""14""0.378378"  
"2716""Naproxen 500 MG Oral Tablet""85644""Foot Pain (Soft Tissue)""5""0.147059"  
"2716""Naproxen 500 MG Oral Tablet""85658""Diffuse Joint Pains (Arthralgias)""3""0.333333"  
"2716""Naproxen 500 MG Oral Tablet""85660""Joint Pain Fingers""3""0.25"  
"2716""Naproxen 500 MG Oral Tablet""85668""Pain In The Hands""5""0.416667"  
"2716""Naproxen 500 MG Oral Tablet""85673""Joint Pain, Localized In The Wrist""4""0.266667"  
"2716""Naproxen 500 MG Oral Tablet""85691""Neck Pain""9""0.428571"  
"2716""Naproxen 500 MG Oral Tablet""85701""Joint Pain, Localized In The Shoulder""15""0.283019"  
"2716""Naproxen 500 MG Oral Tablet""90945""Joint Pain, Localized In The Right Shoulder""7""0.5"  
"2716""Naproxen 500 MG Oral Tablet""90952""Joint Pain, Localized In The Left Shoulder""8""0.470588"  
"2716""Naproxen 500 MG Oral Tablet""91089""Lower Back Pain""73""0.453416"  
"2716""Naproxen 500 MG Oral Tablet""92456""Joint Pain, Localized In More Than One Joint""3""0.3"  
"2716""Naproxen 500 MG Oral Tablet""115846""Back Muscle Spasm""4""0.2"  
"2716""Naproxen 500 MG Oral Tablet""172080""Neck Strain""3""0.5"  
"2716""Naproxen 500 MG Oral Tablet""172086""Lumbar Strain""5""0.416667"

"2716""Naproxen 500 MG Oral Tablet""173419""Cervical Radiculopathy""6""0.333333"  
"2716""Naproxen 500 MG Oral Tablet""251261""Pelvic Pain""5""0.384615"  
"2716""Naproxen 500 MG Oral Tablet""251467""Limb Pain""11""0.22"  
"2716""Naproxen 500 MG Oral Tablet""257996""Arthritis""12""0.141176"  
"2716""Naproxen 500 MG Oral Tablet""259187""Internal Derangement Of Knee""2""0.4"  
"2716""Naproxen 500 MG Oral Tablet""278685""Arthralgias In Multiple Sites""10""0.454545"  
"2716""Naproxen 500 MG Oral Tablet""282272""Anterior Wall Chest Pain With Respiration""2""0.333333"  
"2716""Naproxen 500 MG Oral Tablet""288921""Chronic Pain""8""0.4"  
"2716""Naproxen 500 MG Oral Tablet""288977""Fibromyalgia""3""0.1875"  
"2716""Naproxen 500 MG Oral Tablet""291525""Impingement Of The Right Shoulder""2""0.5"  
"2825""Nitrostat 0.4 MG Sublingual Tablet Sublingual""62975""Coronary Artery Disease""82""0.602941"  
"2825""Nitrostat 0.4 MG Sublingual Tablet Sublingual""62978""Coronary Arteriosclerosis""5""0.3125"  
"2825""Nitrostat 0.4 MG Sublingual Tablet Sublingual""62984""Atypical Chest Pain""11""0.647059"  
"2825""Nitrostat 0.4 MG Sublingual Tablet Sublingual""62985""Chest Pain""14""0.411765"  
"2825""Nitrostat 0.4 MG Sublingual Tablet Sublingual""62987""Angina Pectoris""7""0.4375"  
"2825""Nitrostat 0.4 MG Sublingual Tablet Sublingual""63148""2-vessel Coronary Artery Stenosis""3""0.3"  
"2825""Nitrostat 0.4 MG Sublingual Tablet Sublingual""63217""Congestive Heart Failure""6""0.166667"  
"2827""Nitrostat 0.3 MG Sublingual Tablet Sublingual""62975""Coronary Artery Disease""2""1"  
"3316""PredniSONE 10 MG Oral Tablet""62585""Chronic Sinusitis""9""0.3"  
"3316""PredniSONE 10 MG Oral Tablet""62586""Chronic Maxillary Sinusitis""44""0.333333"  
"3316""PredniSONE 10 MG Oral Tablet""62587""Chronic Frontal Sinusitis""29""0.235772"  
"3316""PredniSONE 10 MG Oral Tablet""62588""Chronic Ethmoidal Sinusitis""90""0.56962"  
"3316""PredniSONE 10 MG Oral Tablet""62590""Chronic Pansinusitis""7""0.583333"  
"3316""PredniSONE 10 MG Oral Tablet""62591""Nasal Polyps""32""0.507936"  
"3316""PredniSONE 10 MG Oral Tablet""62594""Nasal Cavity Polyps""3""0.333333"  
"3316""PredniSONE 10 MG Oral Tablet""64181""Asthma""13""0.0755814"  
"3316""PredniSONE 10 MG Oral Tablet""64205""Chronic Obstructive Pulmonary Disease""11""0.268293"  
"3316""PredniSONE 10 MG Oral Tablet""64207""Chronic Bronchitis With Acute Exacerbation""2""0.4"  
"3316""PredniSONE 10 MG Oral Tablet""64294""Pulmonary Fibrosis""5""0.416667"  
"3316""PredniSONE 10 MG Oral Tablet""64980""Crohn's Disease""8""0.571429"  
"3316""PredniSONE 10 MG Oral Tablet""65041""Ulcerative Colitis""5""0.625"  
"3316""PredniSONE 10 MG Oral Tablet""65047""Crohn's (Granulomatous) Colitis""3""1"  
"3316""PredniSONE 10 MG Oral Tablet""65674""Nephrotic Syndrome""4""0.8"  
"3316""PredniSONE 10 MG Oral Tablet""65676""Nephrotic Syndrome Due To Focal Segmental Sclerosing  
Glomerulonephritis""2""0.666667"  
"3316""PredniSONE 10 MG Oral Tablet""70384""Gout""7""0.388889"  
"3316""PredniSONE 10 MG Oral Tablet""70386""Acute Gout""4""0.571429"  
"3316""PredniSONE 10 MG Oral Tablet""70387""Chronic Gout""4""0.5"  
"3316""PredniSONE 10 MG Oral Tablet""70455""Rheumatoid Arthritis""23""0.46"  
"3316""PredniSONE 10 MG Oral Tablet""70460""Adult Still's Disease""2""1"  
"3316""PredniSONE 10 MG Oral Tablet""70472""Systemic Lupus Erythematosus""28""0.491228"  
"3316""PredniSONE 10 MG Oral Tablet""70475""Scleroderma""9""0.36"  
"3316""PredniSONE 10 MG Oral Tablet""70500""Polymyalgia Rheumatica""2""0.222222"  
"3316""PredniSONE 10 MG Oral Tablet""70598""Polymyositis / Dermatomyositis:""8""0.533333"  
"3316""PredniSONE 10 MG Oral Tablet""70600""Typical Dermatomyositis (Type II)""2""1"  
"3316""PredniSONE 10 MG Oral Tablet""70607""Polymyositis In Scleroderma""2""0.666667"  
"3316""PredniSONE 10 MG Oral Tablet""70620""Sarcoidosis""12""0.545455"  
"3316""PredniSONE 10 MG Oral Tablet""70637""Vasculitides""2""0.333333"  
"3316""PredniSONE 10 MG Oral Tablet""70638""Temporal Arteritis""4""0.8"  
"3316""PredniSONE 10 MG Oral Tablet""70640""Wegener's Granulomatosis""6""0.75"  
"3316""PredniSONE 10 MG Oral Tablet""70648""Behcet's Syndrome""4""0.666667"  
"3316""PredniSONE 10 MG Oral Tablet""70704""Symmetric Polyarticular Inflammation""3""0.428571"  
"3316""PredniSONE 10 MG Oral Tablet""75124""Demyelinating Disorders""2""0.25"  
"3316""PredniSONE 10 MG Oral Tablet""75125""Multiple Sclerosis""4""0.210526"

"3316"|"PredniSONE 10 MG Oral Tablet"|"75358"|"Cerebral Vasculitis"|"2"|"0.222222"  
"3316"|"PredniSONE 10 MG Oral Tablet"|"75733"|"Myasthenia Gravis"|"2"|"0.285714"  
"3316"|"PredniSONE 10 MG Oral Tablet"|"77265"|"Phaeohyphomycosis"|"4"|"0.363636"  
"3316"|"PredniSONE 10 MG Oral Tablet"|"85644"|"Foot Pain (Soft Tissue)"|"2"|"0.222222"  
"3316"|"PredniSONE 10 MG Oral Tablet"|"142384"|"Swelling Of Hands"|"2"|"1"  
"3316"|"PredniSONE 10 MG Oral Tablet"|"274611"|"Nephritis Due To SLE"|"5"|"0.357143"  
"3316"|"PredniSONE 10 MG Oral Tablet"|"278317"|"Dermatitis Due To Contact With Poison Ivy"|"2"|"0.666667"  
"3316"|"PredniSONE 10 MG Oral Tablet"|"278812"|"Prostate Cancer"|"2"|"0.285714"  
"3317"|"PredniSONE 2.5 MG Oral Tablet"|"62588"|"Chronic Ethmoidal Sinusitis"|"6"|"0.857143"  
"3317"|"PredniSONE 2.5 MG Oral Tablet"|"70146"|"Osteoarthritis"|"2"|"0.285714"  
"3317"|"PredniSONE 2.5 MG Oral Tablet"|"70455"|"Rheumatoid Arthritis"|"35"|"0.76087"  
"3317"|"PredniSONE 2.5 MG Oral Tablet"|"70461"|"Juvenile Rheumatoid Arthritis"|"2"|"1"  
"3317"|"PredniSONE 2.5 MG Oral Tablet"|"70472"|"Systemic Lupus Erythematosus"|"21"|"0.75"  
"3317"|"PredniSONE 2.5 MG Oral Tablet"|"70474"|"Mixed Connective Tissue Disease"|"2"|"0.666667"  
"3317"|"PredniSONE 2.5 MG Oral Tablet"|"70475"|"Scleroderma"|"2"|"0.222222"  
"3317"|"PredniSONE 2.5 MG Oral Tablet"|"70500"|"Polymyalgia Rheumatica"|"12"|"0.75"  
"3317"|"PredniSONE 2.5 MG Oral Tablet"|"70598"|"Polymyositis / Dermatomyositis"|"5"|"0.833333"  
"3317"|"PredniSONE 2.5 MG Oral Tablet"|"70600"|"Typical Dermatomyositis (Type II)"|"2"|"0.666667"  
"3317"|"PredniSONE 2.5 MG Oral Tablet"|"70620"|"Sarcoidosis"|"4"|"0.8"  
"3317"|"PredniSONE 2.5 MG Oral Tablet"|"70638"|"Temporal Arteritis"|"4"|"0.8"  
"3317"|"PredniSONE 2.5 MG Oral Tablet"|"70640"|"Wegener's Granulomatosis"|"3"|"0.75"  
"3317"|"PredniSONE 2.5 MG Oral Tablet"|"70642"|"Microscopic Polyarteritis Nodosa"|"2"|"0.666667"  
"3317"|"PredniSONE 2.5 MG Oral Tablet"|"70703"|"Asymmetrical Polyarticular Inflammation"|"2"|"1"  
"3317"|"PredniSONE 2.5 MG Oral Tablet"|"70704"|"Symmetric Polyarticular Inflammation"|"7"|"0.777778"  
"3319"|"PredniSONE 5 MG Oral Tablet"|"61770"|"Panuveitis"|"2"|"1"  
"3319"|"PredniSONE 5 MG Oral Tablet"|"62588"|"Chronic Ethmoidal Sinusitis"|"11"|"0.578947"  
"3319"|"PredniSONE 5 MG Oral Tablet"|"64205"|"Chronic Obstructive Pulmonary Disease"|"5"|"0.138889"  
"3319"|"PredniSONE 5 MG Oral Tablet"|"64286"|"Pulmonary Interstitial / Infiltrative Disorders"|"2"|"0.5"  
"3319"|"PredniSONE 5 MG Oral Tablet"|"65674"|"Nephrotic Syndrome"|"6"|"0.545455"  
"3319"|"PredniSONE 5 MG Oral Tablet"|"67760"|"Connective Tissue Defect"|"3"|"0.75"  
"3319"|"PredniSONE 5 MG Oral Tablet"|"69214"|"Hypopituitarism"|"4"|"0.666667"  
"3319"|"PredniSONE 5 MG Oral Tablet"|"69731"|"Chronic Lupus Erythematosus"|"2"|"0.285714"  
"3319"|"PredniSONE 5 MG Oral Tablet"|"69732"|"Discoid Lupus Erythematosus"|"2"|"0.285714"  
"3319"|"PredniSONE 5 MG Oral Tablet"|"69736"|"Discoid Lupus Erythematosus With Systemic Involvement"|"2"|"0.5"  
"3319"|"PredniSONE 5 MG Oral Tablet"|"69750"|"Dermatitis Due To Drugs And Medicines"|"2"|"0.5"  
"3319"|"PredniSONE 5 MG Oral Tablet"|"69941"|"Urticaria"|"2"|"0.285714"  
"3319"|"PredniSONE 5 MG Oral Tablet"|"70146"|"Osteoarthritis"|"6"|"0.171429"  
"3319"|"PredniSONE 5 MG Oral Tablet"|"70191"|"Localized Osteoarthritis Of The Hand"|"3"|"0.5"  
"3319"|"PredniSONE 5 MG Oral Tablet"|"70384"|"Gout"|"21"|"0.446809"  
"3319"|"PredniSONE 5 MG Oral Tablet"|"70386"|"Acute Gout"|"14"|"0.777778"  
"3319"|"PredniSONE 5 MG Oral Tablet"|"70387"|"Chronic Gout"|"8"|"0.533333"  
"3319"|"PredniSONE 5 MG Oral Tablet"|"70388"|"Chronic Tophaceous Gout"|"2"|"0.666667"  
"3319"|"PredniSONE 5 MG Oral Tablet"|"70406"|"Pseudogout"|"2"|"0.4"  
"3319"|"PredniSONE 5 MG Oral Tablet"|"70455"|"Rheumatoid Arthritis"|"246"|"0.766355"  
"3319"|"PredniSONE 5 MG Oral Tablet"|"70461"|"Juvenile Rheumatoid Arthritis"|"4"|"0.8"  
"3319"|"PredniSONE 5 MG Oral Tablet"|"70463"|"Polyarticular Juvenile Rheumatoid Arthritis"|"2"|"1"  
"3319"|"PredniSONE 5 MG Oral Tablet"|"70472"|"Systemic Lupus Erythematosus"|"118"|"0.732919"  
"3319"|"PredniSONE 5 MG Oral Tablet"|"70474"|"Mixed Connective Tissue Disease"|"4"|"0.5"  
"3319"|"PredniSONE 5 MG Oral Tablet"|"70475"|"Scleroderma"|"52"|"0.619048"  
"3319"|"PredniSONE 5 MG Oral Tablet"|"70476"|"CREST Syndrome"|"6"|"0.6"  
"3319"|"PredniSONE 5 MG Oral Tablet"|"70477"|"Scleroderma With Pulmonary Involvement"|"3"|"0.375"  
"3319"|"PredniSONE 5 MG Oral Tablet"|"70478"|"Sjogren's Syndrome"|"22"|"0.385965"  
"3319"|"PredniSONE 5 MG Oral Tablet"|"70479"|"Sicca Syndrome"|"6"|"0.333333"

"3319"|"PredniSONE 5 MG Oral Tablet"|"70500"|"Polymyalgia Rheumatica"|"38"|"0.716981"  
"3319"|"PredniSONE 5 MG Oral Tablet"|"70550"|"Relapsing Polychondritis"|"5"|"0.714286"  
"3319"|"PredniSONE 5 MG Oral Tablet"|"70552"|"Disorders Of Connective Tissue"|"2"|"1"  
"3319"|"PredniSONE 5 MG Oral Tablet"|"70598"|"Polymyositis / Dermatomyositis:"|"16"|"0.727273"  
"3319"|"PredniSONE 5 MG Oral Tablet"|"70599"|"Typical Polymyositis (Type I)"|"4"|"0.571429"  
"3319"|"PredniSONE 5 MG Oral Tablet"|"70600"|"Typical Dermatomyositis (Type II)"|"4"|"0.5"  
"3319"|"PredniSONE 5 MG Oral Tablet"|"70620"|"Sarcoidosis"|"13"|"0.590909"  
"3319"|"PredniSONE 5 MG Oral Tablet"|"70637"|"Vasculitides"|"3"|"0.428571"  
"3319"|"PredniSONE 5 MG Oral Tablet"|"70638"|"Temporal Arteritis"|"6"|"0.545455"  
"3319"|"PredniSONE 5 MG Oral Tablet"|"70640"|"Wegener's Granulomatosis"|"9"|"0.75"  
"3319"|"PredniSONE 5 MG Oral Tablet"|"70642"|"Microscopic Polyarteritis Nodosa"|"4"|"0.666667"  
"3319"|"PredniSONE 5 MG Oral Tablet"|"70643"|"Allergic Granulomatous Angiitis (Churg-Strauss)"|"2"|"0.666667"  
"3319"|"PredniSONE 5 MG Oral Tablet"|"70664"|"Takayasu's Disease"|"5"|"1"  
"3319"|"PredniSONE 5 MG Oral Tablet"|"70681"|"Polyarthritis"|"6"|"0.857143"  
"3319"|"PredniSONE 5 MG Oral Tablet"|"70703"|"Asymmetrical Polyarticular Inflammation"|"3"|"0.6"  
"3319"|"PredniSONE 5 MG Oral Tablet"|"70704"|"Symmetric Polyarticular Inflammation"|"27"|"0.75"  
"3319"|"PredniSONE 5 MG Oral Tablet"|"70706"|"Ankylosing Spondylitis"|"3"|"0.75"  
"3319"|"PredniSONE 5 MG Oral Tablet"|"70719"|"Psoriatic Arthropathy"|"13"|"0.619048"  
"3319"|"PredniSONE 5 MG Oral Tablet"|"74290"|"Palindromic Rheumatism"|"2"|"0.666667"  
"3319"|"PredniSONE 5 MG Oral Tablet"|"74640"|"Meningeal Sarcoidosis"|"2"|"0.666667"  
"3319"|"PredniSONE 5 MG Oral Tablet"|"75358"|"Cerebral Vasculitis"|"2"|"0.285714"  
"3319"|"PredniSONE 5 MG Oral Tablet"|"75594"|"Spinal Stenosis"|"2"|"0.285714"  
"3319"|"PredniSONE 5 MG Oral Tablet"|"75733"|"Myasthenia Gravis"|"7"|"0.583333"  
"3319"|"PredniSONE 5 MG Oral Tablet"|"75812"|"Myalgia And Myositis"|"10"|"0.434783"  
"3319"|"PredniSONE 5 MG Oral Tablet"|"77910"|"Thrombocytopenia"|"2"|"0.4"  
"3319"|"PredniSONE 5 MG Oral Tablet"|"85658"|"Diffuse Joint Pains (Arthralgias)"|"10"|"0.526316"  
"3319"|"PredniSONE 5 MG Oral Tablet"|"85660"|"Joint Pain Fingers"|"2"|"0.333333"  
"3319"|"PredniSONE 5 MG Oral Tablet"|"93705"|"Dermatitis"|"2"|"0.222222"  
"3319"|"PredniSONE 5 MG Oral Tablet"|"168635"|"Primary Osteoarthritis Of The Lumbar Vertebrae"|"2"|"1"  
"3319"|"PredniSONE 5 MG Oral Tablet"|"257996"|"Arthritis"|"13"|"0.173333"  
"3319"|"PredniSONE 5 MG Oral Tablet"|"277913"|"Chronic Interstitial Lung Disease"|"5"|"0.263158"  
"3319"|"PredniSONE 5 MG Oral Tablet"|"278350"|"Eczema"|"2"|"0.2"  
"3319"|"PredniSONE 5 MG Oral Tablet"|"278685"|"Arthralgias In Multiple Sites"|"12"|"0.428571"  
"3319"|"PredniSONE 5 MG Oral Tablet"|"283861"|"Rheumatoid Arthritis RF Negative"|"3"|"1"  
"3319"|"PredniSONE 5 MG Oral Tablet"|"288804"|"Encephalitis"|"2"|"0.5"  
"3319"|"PredniSONE 5 MG Oral Tablet"|"296649"|"Diffuse Connective Tissue Disorder"|"5"|"0.714286"  
"3319"|"PredniSONE 5 MG Oral Tablet"|"297053"|"Reactive Arthritis"|"3"|"0.75"  
"3323"|"Premarin 0.3 MG Oral Tablet"|"60977"|"Menopause Has Occurred"|"5"|"0.833333"  
"3323"|"Premarin 0.3 MG Oral Tablet"|"66073"|"Menopause"|"5"|"0.555556"  
"3323"|"Premarin 0.3 MG Oral Tablet"|"66076"|"Menopausal Disorder"|"3"|"0.6"  
"3323"|"Premarin 0.3 MG Oral Tablet"|"67803"|"Turner Syndrome"|"2"|"0.5"  
"3323"|"Premarin 0.3 MG Oral Tablet"|"69214"|"Hypopituitarism"|"2"|"0.666667"  
"3323"|"Premarin 0.3 MG Oral Tablet"|"93473"|"Taking Female Hormones For Postmenopausal HRT"|"2"|"1"  
"3323"|"Premarin 0.3 MG Oral Tablet"|"195794"|"Symptomatic Menopause"|"9"|"0.529412"  
"3325"|"Premarin 0.625 MG Oral Tablet"|"60977"|"Menopause Has Occurred"|"6"|"1"  
"3325"|"Premarin 0.625 MG Oral Tablet"|"60984"|"Sudden Redness Of The Skin (Flushing)"|"2"|"0.333333"  
"3325"|"Premarin 0.625 MG Oral Tablet"|"66073"|"Menopause"|"3"|"0.5"  
"3325"|"Premarin 0.625 MG Oral Tablet"|"66075"|"Post-artificial Menopause State"|"2"|"0.5"  
"3325"|"Premarin 0.625 MG Oral Tablet"|"66076"|"Menopausal Disorder"|"2"|"0.666667"  
"3325"|"Premarin 0.625 MG Oral Tablet"|"67803"|"Turner Syndrome"|"3"|"0.75"  
"3325"|"Premarin 0.625 MG Oral Tablet"|"69214"|"Hypopituitarism"|"3"|"1"  
"3325"|"Premarin 0.625 MG Oral Tablet"|"93473"|"Taking Female Hormones For Postmenopausal HRT"|"2"|"0.4"  
"3325"|"Premarin 0.625 MG Oral Tablet"|"195794"|"Symptomatic Menopause"|"3"|"0.375"  
"3448"|"Propranolol HCl 40 MG Oral Tablet"|"63467"|"Hypertension"|"7"|"0.28"

"3448"|"Propranolol HCl 40 MG Oral Tablet"|"63470"|"Benign Essential Hypertension"|"2"|"0.2"  
"3448"|"Propranolol HCl 40 MG Oral Tablet"|"69231"|"Hyperthyroidism"|"3"|"0.333333"  
"3448"|"Propranolol HCl 40 MG Oral Tablet"|"75104"|"Familial (Benign Essential) Tremor"|"3"|"0.6"  
"3448"|"Propranolol HCl 40 MG Oral Tablet"|"282270"|"Palpitations"|"2"|"0.5"  
"3450"|"Propranolol HCl 80 MG Oral Tablet"|"61118"|"Anxiety (Symptom)"|"2"|"0.5"  
"3450"|"Propranolol HCl 80 MG Oral Tablet"|"63467"|"Hypertension"|"5"|"0.384615"  
"3450"|"Propranolol HCl 80 MG Oral Tablet"|"74533"|"Migraine Headache"|"2"|"0.285714"  
"3474"|"Provera 10 MG Oral Tablet"|"69546"|"Dysfunctional Uterine Bleeding"|"2"|"1"  
"3474"|"Provera 10 MG Oral Tablet"|"69549"|"Polycystic Ovarian Syndrome"|"5"|"0.5"  
"3482"|"PROzac 20 MG Oral Capsule"|"76351"|"Depression"|"5"|"0.192308"  
"3866"|"Synthroid 50 MCG Oral Tablet"|"69214"|"Hypopituitarism"|"3"|"0.75"  
"3866"|"Synthroid 50 MCG Oral Tablet"|"69258"|"Hypothyroidism"|"61"|"0.417808"  
"3866"|"Synthroid 50 MCG Oral Tablet"|"69261"|"Postsurgical Primary Hypothyroidism"|"2"|"0.666667"  
"3866"|"Synthroid 50 MCG Oral Tablet"|"69266"|"Congenital Hypothyroidism"|"10"|"0.714286"  
"3866"|"Synthroid 50 MCG Oral Tablet"|"69283"|"Hashimoto's Thyroiditis"|"2"|"0.333333"  
"3869"|"Synthroid 100 MCG Oral Tablet"|"69231"|"Hyperthyroidism"|"2"|"0.2"  
"3869"|"Synthroid 100 MCG Oral Tablet"|"69258"|"Hypothyroidism"|"55"|"0.443548"  
"3869"|"Synthroid 100 MCG Oral Tablet"|"69259"|"Primary Hypothyroidism"|"4"|"0.8"  
"3869"|"Synthroid 100 MCG Oral Tablet"|"69266"|"Congenital Hypothyroidism"|"3"|"0.6"  
"3869"|"Synthroid 100 MCG Oral Tablet"|"69283"|"Hashimoto's Thyroiditis"|"2"|"0.4"  
"3870"|"Synthroid 125 MCG Oral Tablet"|"69258"|"Hypothyroidism"|"52"|"0.464286"  
"3870"|"Synthroid 125 MCG Oral Tablet"|"69263"|"Secondary Hypothyroidism"|"2"|"1"  
"3870"|"Synthroid 125 MCG Oral Tablet"|"69266"|"Congenital Hypothyroidism"|"4"|"0.8"  
"3871"|"Synthroid 150 MCG Oral Tablet"|"69258"|"Hypothyroidism"|"19"|"0.372549"  
"4383"|"Verapamil HCl 80 MG Oral Tablet"|"63467"|"Hypertension"|"2"|"0.285714"  
"4533"|"Zoloft 50 MG Oral Tablet"|"61118"|"Anxiety (Symptom)"|"2"|"0.2"  
"4533"|"Zoloft 50 MG Oral Tablet"|"76351"|"Depression"|"10"|"0.238095"  
"4630"|"Verapamil HCl CR 180 MG Oral Tablet Extended Release"|"63467"|"Hypertension"|"3"|"0.230769"  
"4630"|"Verapamil HCl CR 180 MG Oral Tablet Extended Release"|"63468"|"Essential Hypertension"|"2"|"0.5"  
"4630"|"Verapamil HCl CR 180 MG Oral Tablet Extended Release"|"63470"|"Benign Essential Hypertension"|"2"|"0.5"  
"4650"|"Amoxicillin 250 MG Oral Capsule"|"62365"|"Acute Nonsuppurative Otitis Media"|"2"|"1"  
"4650"|"Amoxicillin 250 MG Oral Capsule"|"65762"|"Urinary Tract Infection"|"4"|"0.5"  
"4692"|"Penicillin V Potassium 125 MG/5ML Oral Solution Reconstituted"|"78008"|"Sickle Cell Hb-SC Disease"|"7"|"0.875"  
"4692"|"Penicillin V Potassium 125 MG/5ML Oral Solution Reconstituted"|"78035"|"Sickle Cell Hb-SS Disease"|"21"|"0.84"  
"4692"|"Penicillin V Potassium 125 MG/5ML Oral Solution Reconstituted"|"259470"|"Sickle Cell Thalassemia"|"2"|"1"  
"4819"|"Dicloxacillin Sodium 500 MG Oral Capsule"|"65995"|"Mastitis"|"3"|"0.5"  
"4819"|"Dicloxacillin Sodium 500 MG Oral Capsule"|"65996"|"Acute Mastitis"|"2"|"1"  
"5028"|"Amoxicillin 125 MG/5ML Oral Suspension Reconstituted"|"62343"|"Otitis Media"|"2"|"0.2"  
"5028"|"Amoxicillin 125 MG/5ML Oral Suspension Reconstituted"|"65745"|"Vesicoureteral Reflux"|"2"|"0.666667"  
"5028"|"Amoxicillin 125 MG/5ML Oral Suspension Reconstituted"|"77891"|"Acute Upper Respiratory Infection"|"5"|"0.294118"  
"5028"|"Amoxicillin 125 MG/5ML Oral Suspension Reconstituted"|"166827"|"Hydronephrosis On The Right"|"2"|"0.4"  
"5028"|"Amoxicillin 125 MG/5ML Oral Suspension Reconstituted"|"166828"|"Hydronephrosis On The Left"|"4"|"0.571429"  
"5028"|"Amoxicillin 125 MG/5ML Oral Suspension Reconstituted"|"166829"|"Hydronephrosis Bilaterally"|"3"|"0.6"  
"5028"|"Amoxicillin 125 MG/5ML Oral Suspension Reconstituted"|"251528"|"Acute Otitis Media"|"8"|"0.470588"  
"5030"|"Amoxicillin 250 MG/5ML Oral Suspension Reconstituted"|"62344"|"Acute Suppurative Otitis Media"|"2"|"0.285714"  
"5030"|"Amoxicillin 250 MG/5ML Oral Suspension Reconstituted"|"62365"|"Acute Nonsuppurative Otitis Media"|"3"|"1"

"5030"|"Amoxicillin 250 MG/5ML Oral Suspension Reconstituted"|"62403"|"Otitis Media Of The Left Ear"|"2"|"0.25"  
"5030"|"Amoxicillin 250 MG/5ML Oral Suspension Reconstituted"|"62577"|"Sinusitis"|"2"|"0.4"  
"5030"|"Amoxicillin 250 MG/5ML Oral Suspension Reconstituted"|"62733"|"Acute Tonsillitis"|"2"|"1"  
"5030"|"Amoxicillin 250 MG/5ML Oral Suspension Reconstituted"|"63490"|"Congenital Heart Disease"|"2"|"0.2"  
"5030"|"Amoxicillin 250 MG/5ML Oral Suspension Reconstituted"|"65762"|"Urinary Tract Infection"|"5"|"0.454545"  
"5030"|"Amoxicillin 250 MG/5ML Oral Suspension Reconstituted"|"251528"|"Acute Otitis Media"|"38"|"0.644068"  
"5030"|"Amoxicillin 250 MG/5ML Oral Suspension Reconstituted"|"251575"|"Streptococcal Sore Throat"|"4"|"1"  
"5030"|"Amoxicillin 250 MG/5ML Oral Suspension Reconstituted"|"274516"|"Acute Pharyngitis  
Streptococcus"|"2"|"0.333333"  
"5095"|"Penicillin V Potassium 250 MG Oral Tablet"|"62760"|"Acute Pharyngitis"|"10"|"0.833333"  
"5095"|"Penicillin V Potassium 250 MG Oral Tablet"|"62817"|"Dentoalveolar Abscess"|"2"|"1"  
"5095"|"Penicillin V Potassium 250 MG Oral Tablet"|"78008"|"Sickle Cell Hb-SC Disease"|"3"|"0.5"  
"5095"|"Penicillin V Potassium 250 MG Oral Tablet"|"78011"|"Sickle Cell Anemia"|"3"|"0.375"  
"5095"|"Penicillin V Potassium 250 MG Oral Tablet"|"78035"|"Sickle Cell Hb-SS Disease"|"8"|"0.615385"  
"5095"|"Penicillin V Potassium 250 MG Oral Tablet"|"191491"|"Total Splenectomy"|"2"|"1"  
"5095"|"Penicillin V Potassium 250 MG Oral Tablet"|"251575"|"Streptococcal Sore Throat"|"3"|"0.6"  
"5097"|"Penicillin V Potassium 500 MG Oral Tablet"|"62759"|"Pharyngitis"|"2"|"0.4"  
"5097"|"Penicillin V Potassium 500 MG Oral Tablet"|"62760"|"Acute Pharyngitis"|"6"|"0.5"  
"5097"|"Penicillin V Potassium 500 MG Oral Tablet"|"62807"|"Acute Periodontitis"|"2"|"1"  
"5097"|"Penicillin V Potassium 500 MG Oral Tablet"|"251575"|"Streptococcal Sore Throat"|"6"|"0.75"  
"5097"|"Penicillin V Potassium 500 MG Oral Tablet"|"274516"|"Acute Pharyngitis Streptococcus"|"5"|"0.625"  
"5602"|"Hydrochlorothiazide 50 MG Oral Tablet"|"63467"|"Hypertension"|"20"|"0.425532"  
"5602"|"Hydrochlorothiazide 50 MG Oral Tablet"|"63468"|"Essential Hypertension"|"9"|"0.391304"  
"5602"|"Hydrochlorothiazide 50 MG Oral Tablet"|"63470"|"Benign Essential Hypertension"|"11"|"0.5"  
"5602"|"Hydrochlorothiazide 50 MG Oral Tablet"|"65662"|"Nephrolithiasis"|"2"|"1"  
"6544"|"Suprax 100 MG/5ML Oral Suspension Reconstituted"|"65762"|"Urinary Tract Infection"|"11"|"0.647059"  
"6544"|"Suprax 100 MG/5ML Oral Suspension Reconstituted"|"251528"|"Acute Otitis Media"|"4"|"0.333333"  
"6549"|"Augmentin 125-31.25 MG/5ML Oral Suspension Reconstituted"|"251528"|"Acute Otitis Media"|"3"|"0.6"  
"7425"|"Penicillin V Potassium 250 MG/5ML Oral Solution Reconstituted"|"62760"|"Acute  
Pharyngitis"|"2"|"0.285714"  
"7425"|"Penicillin V Potassium 250 MG/5ML Oral Solution Reconstituted"|"62761"|"Group A Streptococcus: B  
Hemolytic Pharyngitis"|"2"|"0.4"  
"7425"|"Penicillin V Potassium 250 MG/5ML Oral Solution Reconstituted"|"77089"|"Group A Streptococcal  
Infection"|"3"|"1"  
"7425"|"Penicillin V Potassium 250 MG/5ML Oral Solution Reconstituted"|"78008"|"Sickle Cell Hb-SC  
Disease"|"2"|"0.666667"  
"7425"|"Penicillin V Potassium 250 MG/5ML Oral Solution Reconstituted"|"78035"|"Sickle Cell Hb-SS  
Disease"|"16"|"1"  
"7425"|"Penicillin V Potassium 250 MG/5ML Oral Solution Reconstituted"|"251575"|"Streptococcal Sore  
Throat"|"2"|"0.666667"  
"7425"|"Penicillin V Potassium 250 MG/5ML Oral Solution Reconstituted"|"274516"|"Acute Pharyngitis  
Streptococcus"|"4"|"1"  
"11910"|"Afrin Nasal Spray 0.05 % Nasal Solution"|"62598"|"Allergic Rhinitis"|"2"|"0.4"  
"12340"|"Acetaminophen 500 MG Oral Tablet"|"70146"|"Osteoarthritis"|"2"|"0.333333"  
"12340"|"Acetaminophen 500 MG Oral Tablet"|"85623"|"Joint Pain, Localized In The Knee"|"2"|"0.5"  
"12340"|"Acetaminophen 500 MG Oral Tablet"|"91089"|"Lower Back Pain"|"2"|"0.666667"  
"12347"|"AcetaZOLAMIDE 250 MG Oral Tablet"|"74585"|"Cerebrospinal Fluid Rhinorrhea"|"2"|"1"  
"12403"|"Albustix In Vitro Strip"|"65674"|"Nephrotic Syndrome"|"2"|"0.666667"  
"12403"|"Albustix In Vitro Strip"|"65675"|"Nephrotic Syndrome Due To Minimal Change Glomerulonephritis"|"3"|"1"  
"12422"|"Acetaminophen 325 MG Oral Tablet"|"60899"|"Abdominal Pain"|"2"|"0.285714"  
"12422"|"Acetaminophen 325 MG Oral Tablet"|"257996"|"Arthritis"|"2"|"0.25"  
"12431"|"Acetylcysteine 10 % Inhalation Solution"|"75432"|"Cerebellar Ataxia"|"2"|"1"  
"12505"|"Albuterol Sulfate (2.5 MG/3ML) 0.083% Inhalation Nebulization Solution"|"32925"|"Chronic Respiratory  
Failure"|"8"|"0.470588"

"12505"|"Albuterol Sulfate (2.5 MG/3ML) 0.083% Inhalation Nebulization Solution"|"60869"|"Cough"|"5"|"0.125"  
"12505"|"Albuterol Sulfate (2.5 MG/3ML) 0.083% Inhalation Nebulization  
Solution"|"60874"|"Wheezing"|"4"|"0.102564"  
"12505"|"Albuterol Sulfate (2.5 MG/3ML) 0.083% Inhalation Nebulization Solution"|"64118"|"Acute  
Bronchitis"|"7"|"0.269231"  
"12505"|"Albuterol Sulfate (2.5 MG/3ML) 0.083% Inhalation Nebulization Solution"|"64180"|"Reactive Airway  
Disease"|"17"|"0.386364"  
"12505"|"Albuterol Sulfate (2.5 MG/3ML) 0.083% Inhalation Nebulization  
Solution"|"64181"|"Asthma"|"69"|"0.353846"  
"12505"|"Albuterol Sulfate (2.5 MG/3ML) 0.083% Inhalation Nebulization Solution"|"64182"|"Mild Intermittent  
Asthma"|"2"|"0.285714"  
"12505"|"Albuterol Sulfate (2.5 MG/3ML) 0.083% Inhalation Nebulization Solution"|"64183"|"Mild Persistent  
Asthma"|"3"|"0.375"  
"12505"|"Albuterol Sulfate (2.5 MG/3ML) 0.083% Inhalation Nebulization Solution"|"64184"|"Moderate Persistent  
Asthma"|"2"|"0.333333"  
"12505"|"Albuterol Sulfate (2.5 MG/3ML) 0.083% Inhalation Nebulization Solution"|"64190"|"Exercise-induced  
Asthma"|"3"|"0.375"  
"12505"|"Albuterol Sulfate (2.5 MG/3ML) 0.083% Inhalation Nebulization  
Solution"|"64202"|"Bronchiolitis"|"5"|"0.238095"  
"12505"|"Albuterol Sulfate (2.5 MG/3ML) 0.083% Inhalation Nebulization Solution"|"64205"|"Chronic Obstructive  
Pulmonary Disease"|"17"|"0.459459"  
"12505"|"Albuterol Sulfate (2.5 MG/3ML) 0.083% Inhalation Nebulization Solution"|"64207"|"Chronic Bronchitis  
With Acute Exacerbation"|"2"|"0.333333"  
"12505"|"Albuterol Sulfate (2.5 MG/3ML) 0.083% Inhalation Nebulization  
Solution"|"64212"|"Emphysema"|"4"|"0.333333"  
"12505"|"Albuterol Sulfate (2.5 MG/3ML) 0.083% Inhalation Nebulization Solution"|"67695"|"Cystic  
Fibrosis"|"9"|"0.290323"  
"12505"|"Albuterol Sulfate (2.5 MG/3ML) 0.083% Inhalation Nebulization Solution"|"77891"|"Acute Upper  
Respiratory Infection"|"7"|"0.104478"  
"12505"|"Albuterol Sulfate (2.5 MG/3ML) 0.083% Inhalation Nebulization Solution"|"166743"|"Community-acquired  
Pneumonia"|"2"|"1"  
"12505"|"Albuterol Sulfate (2.5 MG/3ML) 0.083% Inhalation Nebulization Solution"|"166748"|"Asthma With Acute  
Exacerbation"|"7"|"0.269231"  
"12505"|"Albuterol Sulfate (2.5 MG/3ML) 0.083% Inhalation Nebulization Solution"|"258836"|"Restrictive Lung  
Disease"|"3"|"0.5"  
"12505"|"Albuterol Sulfate (2.5 MG/3ML) 0.083% Inhalation Nebulization Solution"|"277913"|"Chronic Interstitial  
Lung Disease"|"3"|"0.6"  
"12505"|"Albuterol Sulfate (2.5 MG/3ML) 0.083% Inhalation Nebulization Solution"|"278128"|"Chronic Lung Disease  
Of Newborn"|"6"|"0.375"  
"12505"|"Albuterol Sulfate (2.5 MG/3ML) 0.083% Inhalation Nebulization Solution"|"297031"|"Intermittent  
Asthma"|"2"|"0.4"  
"12546"|"ALPRAZolam 2 MG Oral Tablet"|"61118"|"Anxiety (Symptom)"|"13"|"0.65"  
"12546"|"ALPRAZolam 2 MG Oral Tablet"|"76536"|"Generalized Anxiety Disorder"|"3"|"0.6"  
"12546"|"ALPRAZolam 2 MG Oral Tablet"|"76537"|"Panic Disorder Without Agoraphobia"|"3"|"1"  
"12546"|"ALPRAZolam 2 MG Oral Tablet"|"76587"|"Anxiety Disorder NOS"|"4"|"1"  
"12546"|"ALPRAZolam 2 MG Oral Tablet"|"76680"|"Adjustment Disorder With Anxiety"|"2"|"0.666667"  
"12569"|"Ambien 10 MG Oral Tablet"|"61108"|"Insomnia"|"11"|"0.229167"  
"12569"|"Ambien 10 MG Oral Tablet"|"76536"|"Generalized Anxiety Disorder"|"2"|"0.333333"  
"12582"|"Amiloride-Hydrochlorothiazide 5-50 MG Oral Tablet"|"63467"|"Hypertension"|"10"|"0.434783"  
"12582"|"Amiloride-Hydrochlorothiazide 5-50 MG Oral Tablet"|"63468"|"Essential Hypertension"|"3"|"0.333333"  
"12582"|"Amiloride-Hydrochlorothiazide 5-50 MG Oral Tablet"|"63470"|"Benign Essential  
Hypertension"|"13"|"0.764706"  
"12611"|"Allopurinol 100 MG Oral Tablet"|"28146"|"Chronic Renal Failure"|"3"|"0.12"  
"12611"|"Allopurinol 100 MG Oral Tablet"|"30790"|"Diastolic Hypertension"|"2"|"0.5"

"12611"|"Allopurinol 100 MG Oral Tablet"|"65685"|"Asymptomatic Hyperuricemia"|"10"|"0.625"  
"12611"|"Allopurinol 100 MG Oral Tablet"|"65689"|"Nephrosclerosis With Benign Hypertension"|"2"|"0.4"  
"12611"|"Allopurinol 100 MG Oral Tablet"|"70384"|"Gout"|"56"|"0.56"  
"12611"|"Allopurinol 100 MG Oral Tablet"|"70386"|"Acute Gout"|"10"|"0.384615"  
"12611"|"Allopurinol 100 MG Oral Tablet"|"70387"|"Chronic Gout"|"30"|"0.714286"  
"12611"|"Allopurinol 100 MG Oral Tablet"|"70388"|"Chronic Tophaceous Gout"|"2"|"0.285714"  
"12611"|"Allopurinol 100 MG Oral Tablet"|"274606"|"Chronic Kidney Disease, Stage 3"|"4"|"0.108108"  
"12612"|"Allopurinol 300 MG Oral Tablet"|"65685"|"Asymptomatic Hyperuricemia"|"2"|"0.4"  
"12612"|"Allopurinol 300 MG Oral Tablet"|"70384"|"Gout"|"75"|"0.6"  
"12612"|"Allopurinol 300 MG Oral Tablet"|"70386"|"Acute Gout"|"8"|"0.421053"  
"12612"|"Allopurinol 300 MG Oral Tablet"|"70387"|"Chronic Gout"|"24"|"0.705882"  
"12612"|"Allopurinol 300 MG Oral Tablet"|"70388"|"Chronic Tophaceous Gout"|"5"|"0.625"  
"12612"|"Allopurinol 300 MG Oral Tablet"|"298484"|"Chronic Gouty Arthropathy"|"2"|"1"  
"12616"|"ALPRAZolam 0.25 MG Oral Tablet"|"61108"|"Insomnia"|"7"|"0.225806"  
"12616"|"ALPRAZolam 0.25 MG Oral Tablet"|"61118"|"Anxiety (Symptom)"|"45"|"0.633803"  
"12616"|"ALPRAZolam 0.25 MG Oral Tablet"|"75933"|"Anxiety Disorder Due To General Medical Condition With  
Panic Attacks"|"4"|"0.8"  
"12616"|"ALPRAZolam 0.25 MG Oral Tablet"|"76388"|"Bipolar Disorder NOS"|"2"|"0.5"  
"12616"|"ALPRAZolam 0.25 MG Oral Tablet"|"76536"|"Generalized Anxiety Disorder"|"2"|"0.333333"  
"12616"|"ALPRAZolam 0.25 MG Oral Tablet"|"76538"|"Panic Disorder With Agoraphobia"|"3"|"0.5"  
"12616"|"ALPRAZolam 0.25 MG Oral Tablet"|"76587"|"Anxiety Disorder NOS"|"7"|"0.538462"  
"12616"|"ALPRAZolam 0.25 MG Oral Tablet"|"275604"|"Depression With Anxiety"|"2"|"0.4"  
"12617"|"ALPRAZolam 0.5 MG Oral Tablet"|"61108"|"Insomnia"|"4"|"0.111111"  
"12617"|"ALPRAZolam 0.5 MG Oral Tablet"|"61118"|"Anxiety (Symptom)"|"41"|"0.672131"  
"12617"|"ALPRAZolam 0.5 MG Oral Tablet"|"70475"|"Scleroderma"|"2"|"0.4"  
"12617"|"ALPRAZolam 0.5 MG Oral Tablet"|"76272"|"Schizoaffective Disorder"|"2"|"1"  
"12617"|"ALPRAZolam 0.5 MG Oral Tablet"|"76351"|"Depression"|"6"|"0.113208"  
"12617"|"ALPRAZolam 0.5 MG Oral Tablet"|"76357"|"Major Depression, Recurrent"|"2"|"0.285714"  
"12617"|"ALPRAZolam 0.5 MG Oral Tablet"|"76536"|"Generalized Anxiety Disorder"|"2"|"0.4"  
"12617"|"ALPRAZolam 0.5 MG Oral Tablet"|"76537"|"Panic Disorder Without Agoraphobia"|"5"|"0.833333"  
"12617"|"ALPRAZolam 0.5 MG Oral Tablet"|"76587"|"Anxiety Disorder NOS"|"7"|"0.636364"  
"12617"|"ALPRAZolam 0.5 MG Oral Tablet"|"76680"|"Adjustment Disorder With Anxiety"|"2"|"0.5"  
"12617"|"ALPRAZolam 0.5 MG Oral Tablet"|"251600"|"Dementia"|"2"|"0.285714"  
"12617"|"ALPRAZolam 0.5 MG Oral Tablet"|"275604"|"Depression With Anxiety"|"2"|"0.333333"  
"12618"|"ALPRAZolam 1 MG Oral Tablet"|"61108"|"Insomnia"|"5"|"0.416667"  
"12618"|"ALPRAZolam 1 MG Oral Tablet"|"61118"|"Anxiety (Symptom)"|"17"|"0.548387"  
"12618"|"ALPRAZolam 1 MG Oral Tablet"|"75931"|"Anxiety Disorder Due To General Medical  
Condition"|"2"|"0.666667"  
"12618"|"ALPRAZolam 1 MG Oral Tablet"|"76388"|"Bipolar Disorder NOS"|"2"|"0.666667"  
"12618"|"ALPRAZolam 1 MG Oral Tablet"|"76536"|"Generalized Anxiety Disorder"|"5"|"0.5"  
"12618"|"ALPRAZolam 1 MG Oral Tablet"|"76537"|"Panic Disorder Without Agoraphobia"|"2"|"0.666667"  
"12618"|"ALPRAZolam 1 MG Oral Tablet"|"76538"|"Panic Disorder With Agoraphobia"|"2"|"1"  
"12618"|"ALPRAZolam 1 MG Oral Tablet"|"76587"|"Anxiety Disorder NOS"|"7"|"0.777778"  
"12618"|"ALPRAZolam 1 MG Oral Tablet"|"76680"|"Adjustment Disorder With Anxiety"|"2"|"1"  
"12618"|"ALPRAZolam 1 MG Oral Tablet"|"275592"|"Post-traumatic Stress Disorder"|"2"|"0.666667"  
"12620"|"Altace 10 MG Oral Capsule"|"63468"|"Essential Hypertension"|"2"|"0.333333"  
"12636"|"Amantadine HCl 100 MG Oral Capsule"|"75080"|"Parkinson's Disease"|"7"|"0.5"  
"12636"|"Amantadine HCl 100 MG Oral Capsule"|"75124"|"Demyelinating Disorders"|"4"|"0.571429"  
"12636"|"Amantadine HCl 100 MG Oral Capsule"|"75125"|"Multiple Sclerosis"|"8"|"0.222222"  
"12636"|"Amantadine HCl 100 MG Oral Capsule"|"252681"|"Fatigue"|"3"|"0.5"  
"12640"|"Ambien 5 MG Oral Tablet"|"61108"|"Insomnia"|"6"|"0.375"  
"12648"|"Amitriptyline HCl 10 MG Oral Tablet"|"60828"|"Headache"|"25"|"0.446429"  
"12648"|"Amitriptyline HCl 10 MG Oral Tablet"|"60895"|"Vomiting (Symptom)"|"5"|"0.5"  
"12648"|"Amitriptyline HCl 10 MG Oral Tablet"|"60899"|"Abdominal Pain"|"41"|"0.621212"

"12648"|"Amitriptyline HCl 10 MG Oral Tablet"|"61108"|"Insomnia"|"3"|"0.214286"  
"12648"|"Amitriptyline HCl 10 MG Oral Tablet"|"65076"|"Irritable Bowel Syndrome"|"9"|"0.409091"  
"12648"|"Amitriptyline HCl 10 MG Oral Tablet"|"65756"|"Chronic Interstitial Cystitis"|"4"|"1"  
"12648"|"Amitriptyline HCl 10 MG Oral Tablet"|"70472"|"Systemic Lupus Erythematosus"|"2"|"0.222222"  
"12648"|"Amitriptyline HCl 10 MG Oral Tablet"|"70569"|"Myopathies"|"2"|"0.4"  
"12648"|"Amitriptyline HCl 10 MG Oral Tablet"|"74529"|"Headache Syndromes"|"4"|"0.363636"  
"12648"|"Amitriptyline HCl 10 MG Oral Tablet"|"74530"|"Tension-type Headache"|"5"|"0.333333"  
"12648"|"Amitriptyline HCl 10 MG Oral Tablet"|"74533"|"Migraine Headache"|"23"|"0.315068"  
"12648"|"Amitriptyline HCl 10 MG Oral Tablet"|"74537"|"Common Migraine (Without Aura)"|"13"|"0.541667"  
"12648"|"Amitriptyline HCl 10 MG Oral Tablet"|"74547"|"Abdominal Migraine Headache"|"3"|"0.6"  
"12648"|"Amitriptyline HCl 10 MG Oral Tablet"|"74551"|"Non-migrainous Vascular Headache"|"3"|"0.75"  
"12648"|"Amitriptyline HCl 10 MG Oral Tablet"|"74767"|"Brain Tumor"|"2"|"0.666667"  
"12648"|"Amitriptyline HCl 10 MG Oral Tablet"|"75125"|"Multiple Sclerosis"|"8"|"0.444444"  
"12648"|"Amitriptyline HCl 10 MG Oral Tablet"|"75601"|"Polyneuropathy"|"2"|"0.222222"  
"12648"|"Amitriptyline HCl 10 MG Oral Tablet"|"75674"|"Idiopathic Peripheral Neuropathy"|"2"|"0.666667"  
"12648"|"Amitriptyline HCl 10 MG Oral Tablet"|"75812"|"Myalgia And Myositis"|"2"|"0.222222"  
"12648"|"Amitriptyline HCl 10 MG Oral Tablet"|"85658"|"Diffuse Joint Pains (Arthralgias)"|"2"|"0.5"  
"12648"|"Amitriptyline HCl 10 MG Oral Tablet"|"85701"|"Joint Pain, Localized In The Shoulder"|"2"|"0.333333"  
"12648"|"Amitriptyline HCl 10 MG Oral Tablet"|"87741"|"Abdominal Pain Around The Belly Button  
(Periumbilical)"|"4"|"0.363636"  
"12648"|"Amitriptyline HCl 10 MG Oral Tablet"|"87743"|"Diffuse Abdominal Pain"|"14"|"0.636364"  
"12648"|"Amitriptyline HCl 10 MG Oral Tablet"|"87902"|"Urinary Frequency More Than Twice At Night  
(Nocturia)"|"2"|"0.666667"  
"12648"|"Amitriptyline HCl 10 MG Oral Tablet"|"91089"|"Lower Back Pain"|"7"|"0.304348"  
"12648"|"Amitriptyline HCl 10 MG Oral Tablet"|"251261"|"Pelvic Pain"|"3"|"0.6"  
"12648"|"Amitriptyline HCl 10 MG Oral Tablet"|"252681"|"Fatigue"|"3"|"0.12"  
"12648"|"Amitriptyline HCl 10 MG Oral Tablet"|"257912"|"Disorder Of Mitochondrial Metabolism"|"2"|"0.285714"  
"12648"|"Amitriptyline HCl 10 MG Oral Tablet"|"278685"|"Arthralgias In Multiple Sites"|"4"|"0.363636"  
"12648"|"Amitriptyline HCl 10 MG Oral Tablet"|"282695"|"Cyclic Vomiting Syndrome"|"2"|"1"  
"12648"|"Amitriptyline HCl 10 MG Oral Tablet"|"288921"|"Chronic Pain"|"3"|"0.230769"  
"12648"|"Amitriptyline HCl 10 MG Oral Tablet"|"288933"|"Peripheral Neuropathy"|"2"|"0.222222"  
"12648"|"Amitriptyline HCl 10 MG Oral Tablet"|"288977"|"Fibromyalgia"|"13"|"0.590909"  
"12650"|"Amitriptyline HCl 50 MG Oral Tablet"|"61108"|"Insomnia"|"3"|"0.333333"  
"12650"|"Amitriptyline HCl 50 MG Oral Tablet"|"74538"|"Common Migraine (Without Aura) With Intractable  
Migraine"|"2"|"1"  
"12650"|"Amitriptyline HCl 50 MG Oral Tablet"|"76351"|"Depression"|"5"|"0.208333"  
"12650"|"Amitriptyline HCl 50 MG Oral Tablet"|"288921"|"Chronic Pain"|"2"|"0.4"  
"12650"|"Amitriptyline HCl 50 MG Oral Tablet"|"288933"|"Peripheral Neuropathy"|"5"|"0.625"  
"12651"|"Amitriptyline HCl 75 MG Oral Tablet"|"74533"|"Migraine Headache"|"2"|"0.4"  
"12659"|"Ampicillin 250 MG Oral Capsule"|"65762"|"Urinary Tract Infection"|"3"|"1"  
"12694"|"AMILoride HCl 5 MG Oral Tablet"|"63467"|"Hypertension"|"4"|"0.333333"  
"12712"|"Amitriptyline HCl 100 MG Oral Tablet"|"61108"|"Insomnia"|"2"|"0.4"  
"12712"|"Amitriptyline HCl 100 MG Oral Tablet"|"69402"|"Diabetes Mellitus Poorly Controlled"|"2"|"1"  
"12712"|"Amitriptyline HCl 100 MG Oral Tablet"|"76351"|"Depression"|"3"|"0.375"  
"12712"|"Amitriptyline HCl 100 MG Oral Tablet"|"288933"|"Peripheral Neuropathy"|"2"|"0.333333"  
"12713"|"Amitriptyline HCl 25 MG Oral Tablet"|"60828"|"Headache"|"15"|"0.365854"  
"12713"|"Amitriptyline HCl 25 MG Oral Tablet"|"60899"|"Abdominal Pain"|"8"|"0.285714"  
"12713"|"Amitriptyline HCl 25 MG Oral Tablet"|"61070"|"Tingling (Paresthesia)"|"3"|"0.3"  
"12713"|"Amitriptyline HCl 25 MG Oral Tablet"|"61108"|"Insomnia"|"8"|"0.275862"  
"12713"|"Amitriptyline HCl 25 MG Oral Tablet"|"65076"|"Irritable Bowel Syndrome"|"13"|"0.52"  
"12713"|"Amitriptyline HCl 25 MG Oral Tablet"|"69424"|"Diabetic Peripheral Neuropathy"|"3"|"0.272727"  
"12713"|"Amitriptyline HCl 25 MG Oral Tablet"|"70455"|"Rheumatoid Arthritis"|"3"|"0.1875"  
"12713"|"Amitriptyline HCl 25 MG Oral Tablet"|"73666"|"Backache"|"4"|"0.181818"  
"12713"|"Amitriptyline HCl 25 MG Oral Tablet"|"74529"|"Headache Syndromes"|"3"|"0.166667"

"12713"|"Amitriptyline HCl 25 MG Oral Tablet"|"74533"|"Migraine Headache"|"7"|"0.127273"  
"12713"|"Amitriptyline HCl 25 MG Oral Tablet"|"74537"|"Common Migraine (Without Aura)"|"4"|"0.25"  
"12713"|"Amitriptyline HCl 25 MG Oral Tablet"|"74538"|"Common Migraine (Without Aura) With Intractable Migraine"|"5"|"0.555556"  
"12713"|"Amitriptyline HCl 25 MG Oral Tablet"|"74551"|"Non-migrainous Vascular Headache"|"3"|"0.428571"  
"12713"|"Amitriptyline HCl 25 MG Oral Tablet"|"75125"|"Multiple Sclerosis"|"7"|"0.4375"  
"12713"|"Amitriptyline HCl 25 MG Oral Tablet"|"75486"|"Trigeminal Neuralgia"|"2"|"1"  
"12713"|"Amitriptyline HCl 25 MG Oral Tablet"|"75601"|"Polyneuropathy"|"3"|"0.428571"  
"12713"|"Amitriptyline HCl 25 MG Oral Tablet"|"75674"|"Idiopathic Peripheral Neuropathy"|"2"|"1"  
"12713"|"Amitriptyline HCl 25 MG Oral Tablet"|"75717"|"Cervicalgia"|"3"|"0.214286"  
"12713"|"Amitriptyline HCl 25 MG Oral Tablet"|"75765"|"Postherpetic Neuralgia"|"3"|"0.75"  
"12713"|"Amitriptyline HCl 25 MG Oral Tablet"|"76351"|"Depression"|"10"|"0.222222"  
"12713"|"Amitriptyline HCl 25 MG Oral Tablet"|"87743"|"Diffuse Abdominal Pain"|"4"|"0.8"  
"12713"|"Amitriptyline HCl 25 MG Oral Tablet"|"91089"|"Lower Back Pain"|"4"|"0.190476"  
"12713"|"Amitriptyline HCl 25 MG Oral Tablet"|"173419"|"Cervical Radiculopathy"|"3"|"0.75"  
"12713"|"Amitriptyline HCl 25 MG Oral Tablet"|"288921"|"Chronic Pain"|"2"|"0.4"  
"12713"|"Amitriptyline HCl 25 MG Oral Tablet"|"288933"|"Peripheral Neuropathy"|"5"|"0.263158"  
"12713"|"Amitriptyline HCl 25 MG Oral Tablet"|"288977"|"Fibromyalgia"|"10"|"0.5"  
"12713"|"Amitriptyline HCl 25 MG Oral Tablet"|"292510"|"Myofascial Pain Syndrome"|"2"|"0.5"  
"12713"|"Amitriptyline HCl 25 MG Oral Tablet"|"293541"|"New Daily Persistent Headache"|"2"|"0.666667"  
"12725"|"Ampicillin 500 MG Oral Capsule"|"65762"|"Urinary Tract Infection"|"55"|"0.808824"  
"12725"|"Ampicillin 500 MG Oral Capsule"|"66490"|"Pregnancy Complicated By Asymptomatic Bacteriuria"|"2"|"1"  
"12774"|"Anucort-HC 25 MG Rectal Suppository"|"65128"|"Hemorrhoids"|"18"|"0.782609"  
"12774"|"Anucort-HC 25 MG Rectal Suppository"|"65130"|"Hemorrhoids With Bleeding"|"2"|"0.666667"  
"12774"|"Anucort-HC 25 MG Rectal Suppository"|"65141"|"External Hemorrhoids"|"2"|"0.666667"  
"12774"|"Anucort-HC 25 MG Rectal Suppository"|"65150"|"Anal Fissure"|"2"|"0.333333"  
"12819"|"Antipyrine-Benzocaine 5.4-1.4 % Otic Solution"|"62329"|"Acute Otitis Externa"|"2"|"0.666667"  
"12819"|"Antipyrine-Benzocaine 5.4-1.4 % Otic Solution"|"62543"|"Earache"|"7"|"0.875"  
"12819"|"Antipyrine-Benzocaine 5.4-1.4 % Otic Solution"|"62556"|"Eustachian Tube Disorder"|"2"|"1"  
"12819"|"Antipyrine-Benzocaine 5.4-1.4 % Otic Solution"|"77891"|"Acute Upper Respiratory Infection"|"3"|"0.230769"  
"12819"|"Antipyrine-Benzocaine 5.4-1.4 % Otic Solution"|"251528"|"Acute Otitis Media"|"7"|"0.7"  
"12819"|"Antipyrine-Benzocaine 5.4-1.4 % Otic Solution"|"265990"|"Earache (Symptom)"|"14"|"0.875"  
"12854"|"Armour Thyroid 120 MG Oral Tablet"|"69258"|"Hypothyroidism"|"2"|"0.25"  
"12897"|"Aquaphor External Ointment"|"69964"|"Xerosis Cutis"|"3"|"1"  
"12897"|"Aquaphor External Ointment"|"278350"|"Eczema"|"5"|"0.833333"  
"12906"|"Armour Thyroid 30 MG Oral Tablet"|"69258"|"Hypothyroidism"|"7"|"0.5"  
"12907"|"Armour Thyroid 60 MG Oral Tablet"|"69230"|"Thyroid Disorder"|"2"|"0.4"  
"12907"|"Armour Thyroid 60 MG Oral Tablet"|"69258"|"Hypothyroidism"|"9"|"0.310345"  
"12907"|"Armour Thyroid 60 MG Oral Tablet"|"252681"|"Fatigue"|"2"|"0.25"  
"12914"|"Asacol 400 MG Oral Tablet Delayed Release"|"64980"|"Crohn's Disease"|"3"|"0.272727"  
"12914"|"Asacol 400 MG Oral Tablet Delayed Release"|"65041"|"Ulcerative Colitis"|"5"|"0.333333"  
"12914"|"Asacol 400 MG Oral Tablet Delayed Release"|"65047"|"Crohn's (Granulomatous) Colitis"|"3"|"0.75"  
"12915"|"Aspirin-Low 81 MG Oral Tablet Delayed Release"|"62975"|"Coronary Artery Disease"|"2"|"0.285714"  
"12927"|"Aspirin Childrens 81 MG Oral Tablet Chewable"|"63490"|"Congenital Heart Disease"|"2"|"0.5"  
"12927"|"Aspirin Childrens 81 MG Oral Tablet Chewable"|"63526"|"Hypoplastic Left Heart Syndrome"|"2"|"0.666667"  
"12943"|"Atropine Sulfate 1 % Ophthalmic Solution"|"166505"|"Sialosis"|"2"|"1"  
"12985"|"Bacitracin 500 UNIT/GM External Ointment"|"69999"|"Cellulitis"|"2"|"0.333333"  
"12985"|"Bacitracin 500 UNIT/GM External Ointment"|"70027"|"Folliculitis"|"2"|"1"  
"12991"|"Baclofen 10 MG Oral Tablet"|"73790"|"Contracture"|"2"|"1"  
"12991"|"Baclofen 10 MG Oral Tablet"|"73799"|"Contracture Of Multiple Sites"|"2"|"0.4"  
"12991"|"Baclofen 10 MG Oral Tablet"|"75080"|"Parkinson's Disease"|"3"|"0.25"  
"12991"|"Baclofen 10 MG Oral Tablet"|"75124"|"Demyelinating Disorders"|"2"|"0.333333"  
"12991"|"Baclofen 10 MG Oral Tablet"|"75125"|"Multiple Sclerosis"|"34"|"0.409639"

"12991"|"Baclofen 10 MG Oral Tablet"|"75354"|"Cerebral Artery Thrombosis - With Cerebral Infarction"|"2"|"0.333333"  
"12991"|"Baclofen 10 MG Oral Tablet"|"75486"|"Trigeminal Neuralgia"|"6"|"0.5"  
"12991"|"Baclofen 10 MG Oral Tablet"|"75717"|"Cervicalgia"|"2"|"0.222222"  
"12991"|"Baclofen 10 MG Oral Tablet"|"75811"|"Muscle Spasm"|"8"|"0.533333"  
"12991"|"Baclofen 10 MG Oral Tablet"|"91089"|"Lower Back Pain"|"7"|"0.35"  
"12991"|"Baclofen 10 MG Oral Tablet"|"115846"|"Back Muscle Spasm"|"2"|"0.5"  
"12991"|"Baclofen 10 MG Oral Tablet"|"165406"|"Paraparesis (Lower Extremities)"|"2"|"0.285714"  
"12991"|"Baclofen 10 MG Oral Tablet"|"165460"|"Quadriplegia"|"2"|"0.333333"  
"12991"|"Baclofen 10 MG Oral Tablet"|"165477"|"Spasticity"|"3"|"0.5"  
"12991"|"Baclofen 10 MG Oral Tablet"|"165483"|"Hemispasticity Of Right Side"|"2"|"0.666667"  
"12991"|"Baclofen 10 MG Oral Tablet"|"165486"|"Hemispasticity Of Left Side"|"4"|"1"  
"12991"|"Baclofen 10 MG Oral Tablet"|"165488"|"Hemispasticity Of Left Side - (Nondominant Side)"|"8"|"0.666667"  
"12991"|"Baclofen 10 MG Oral Tablet"|"201177"|"Quadriplegic Cerebral Palsy With Spasticity"|"13"|"0.5"  
"12991"|"Baclofen 10 MG Oral Tablet"|"252623"|"Myelopathy"|"2"|"0.222222"  
"12991"|"Baclofen 10 MG Oral Tablet"|"288856"|"Spasms"|"3"|"0.428571"  
"12991"|"Baclofen 10 MG Oral Tablet"|"288965"|"Spastic Gait"|"2"|"0.4"  
"12991"|"Baclofen 10 MG Oral Tablet"|"292509"|"Multisystem Atrophy"|"2"|"0.666667"  
"13022"|"Benadryl 25 MG Oral Capsule"|"76238"|"Paranoid Schizophrenia, Stable"|"2"|"1"  
"13046"|"Benzonatate 100 MG Oral Capsule"|"60869"|"Cough"|"122"|"0.559633"  
"13046"|"Benzonatate 100 MG Oral Capsule"|"62578"|"Acute Sinusitis"|"19"|"0.279412"  
"13046"|"Benzonatate 100 MG Oral Capsule"|"62596"|"Common Cold"|"5"|"0.3125"  
"13046"|"Benzonatate 100 MG Oral Capsule"|"62598"|"Allergic Rhinitis"|"16"|"0.0924855"  
"13046"|"Benzonatate 100 MG Oral Capsule"|"62760"|"Acute Pharyngitis"|"5"|"0.2"  
"13046"|"Benzonatate 100 MG Oral Capsule"|"64118"|"Acute Bronchitis"|"35"|"0.368421"  
"13046"|"Benzonatate 100 MG Oral Capsule"|"64119"|"Influenza"|"3"|"0.3"  
"13046"|"Benzonatate 100 MG Oral Capsule"|"64170"|"Bronchopneumonia"|"2"|"1"  
"13046"|"Benzonatate 100 MG Oral Capsule"|"64206"|"Chronic Bronchitis"|"4"|"0.571429"  
"13046"|"Benzonatate 100 MG Oral Capsule"|"76702"|"Viral Infection"|"3"|"0.230769"  
"13046"|"Benzonatate 100 MG Oral Capsule"|"77890"|"Upper Respiratory Infection"|"11"|"0.183333"  
"13046"|"Benzonatate 100 MG Oral Capsule"|"77891"|"Acute Upper Respiratory Infection"|"96"|"0.518919"  
"13046"|"Benzonatate 100 MG Oral Capsule"|"87543"|"Chronic Cough"|"4"|"0.5"  
"13046"|"Benzonatate 100 MG Oral Capsule"|"87587"|"Coughing Up Sputum Yellow"|"6"|"0.6"  
"13046"|"Benzonatate 100 MG Oral Capsule"|"258835"|"Bronchitis"|"9"|"0.264706"  
"13046"|"Benzonatate 100 MG Oral Capsule"|"277876"|"Lobar Pneumonia"|"2"|"0.5"  
"13046"|"Benzonatate 100 MG Oral Capsule"|"277914"|"Acute Bronchitis With Bronchospasm"|"3"|"0.75"  
"13047"|"Benzoyl Peroxide 10 % External Gel"|"69606"|"Acne"|"4"|"1"  
"13048"|"Benzoyl Peroxide 2.5 % External Gel"|"69606"|"Acne"|"3"|"0.75"  
"13049"|"Benzoyl Peroxide 5 % External Gel"|"69606"|"Acne"|"4"|"0.8"  
"13066"|"Aspirin 81 MG Oral Tablet Chewable"|"62975"|"Coronary Artery Disease"|"3"|"0.157895"  
"13066"|"Aspirin 81 MG Oral Tablet Chewable"|"63490"|"Congenital Heart Disease"|"2"|"0.5"  
"13067"|"Aspirin 325 MG Oral Tablet"|"62914"|"Atrial Flutter"|"3"|"0.5"  
"13067"|"Aspirin 325 MG Oral Tablet"|"62916"|"Atrial Fibrillation"|"6"|"0.111111"  
"13067"|"Aspirin 325 MG Oral Tablet"|"62975"|"Coronary Artery Disease"|"30"|"0.157895"  
"13067"|"Aspirin 325 MG Oral Tablet"|"62985"|"Chest Pain"|"3"|"0.115385"  
"13067"|"Aspirin 325 MG Oral Tablet"|"62987"|"Angina Pectoris"|"2"|"0.222222"  
"13067"|"Aspirin 325 MG Oral Tablet"|"63148"|"2-vessel Coronary Artery Stenosis"|"2"|"0.4"  
"13067"|"Aspirin 325 MG Oral Tablet"|"63173"|"Cardiomyopathy"|"2"|"0.2"  
"13067"|"Aspirin 325 MG Oral Tablet"|"201186"|"Ischemic Stroke"|"3"|"0.176471"  
"13087"|"Atenolol 25 MG Oral Tablet"|"60854"|"Palpitations (Symptom)"|"4"|"0.181818"  
"13087"|"Atenolol 25 MG Oral Tablet"|"62902"|"Supraventricular Tachycardia"|"2"|"0.2"  
"13087"|"Atenolol 25 MG Oral Tablet"|"62913"|"Paroxysmal Tachycardia"|"2"|"1"  
"13087"|"Atenolol 25 MG Oral Tablet"|"62917"|"Paroxysmal Atrial Fibrillation"|"2"|"0.333333"  
"13087"|"Atenolol 25 MG Oral Tablet"|"62947"|"Ventricular Tachycardia"|"2"|"0.285714"

"13087"|"Atenolol 25 MG Oral Tablet"|"62975"|"Coronary Artery Disease"|"17"|"0.104294"  
"13087"|"Atenolol 25 MG Oral Tablet"|"62978"|"Coronary Arteriosclerosis"|"5"|"0.3125"  
"13087"|"Atenolol 25 MG Oral Tablet"|"63467"|"Hypertension"|"115"|"0.367412"  
"13087"|"Atenolol 25 MG Oral Tablet"|"63468"|"Essential Hypertension"|"76"|"0.567164"  
"13087"|"Atenolol 25 MG Oral Tablet"|"63469"|"Systolic Hypertension"|"2"|"0.666667"  
"13087"|"Atenolol 25 MG Oral Tablet"|"63470"|"Benign Essential Hypertension"|"66"|"0.511628"  
"13087"|"Atenolol 25 MG Oral Tablet"|"69234"|"Graves' Disease"|"2"|"0.5"  
"13087"|"Atenolol 25 MG Oral Tablet"|"250579"|"Blood Pressure Isolated Elevated"|"3"|"0.3"  
"13087"|"Atenolol 25 MG Oral Tablet"|"282270"|"Palpitations"|"8"|"0.173913"  
"13091"|"Ativan 0.5 MG Oral Tablet"|"61118"|"Anxiety (Symptom)"|"3"|"0.375"  
"13091"|"Ativan 0.5 MG Oral Tablet"|"251600"|"Dementia"|"2"|"0.666667"  
"13095"|"Benzoyl Peroxide 10 % External Lotion"|"69606"|"Acne"|"7"|"1"  
"13097"|"Benzoyl Peroxide Wash 10 % External Liquid"|"69606"|"Acne"|"3"|"1"  
"13098"|"Benzoyl Peroxide Wash 5 % External Liquid"|"69606"|"Acne"|"3"|"1"  
"13099"|"Benzotropine Mesylate 1 MG Oral Tablet"|"76212"|"Psychosis"|"4"|"0.8"  
"13099"|"Benzotropine Mesylate 1 MG Oral Tablet"|"76213"|"Schizophrenia"|"6"|"0.857143"  
"13099"|"Benzotropine Mesylate 1 MG Oral Tablet"|"76232"|"Paranoid Schizophrenia"|"15"|"0.882353"  
"13099"|"Benzotropine Mesylate 1 MG Oral Tablet"|"76234"|"Paranoid Schizophrenia, Chronic"|"3"|"0.75"  
"13099"|"Benzotropine Mesylate 1 MG Oral Tablet"|"76237"|"Paranoid Schizophrenia In Remission"|"2"|"1"  
"13099"|"Benzotropine Mesylate 1 MG Oral Tablet"|"76238"|"Paranoid Schizophrenia, Stable"|"7"|"1"  
"13099"|"Benzotropine Mesylate 1 MG Oral Tablet"|"76250"|"Residual Schizophrenia"|"2"|"1"  
"13099"|"Benzotropine Mesylate 1 MG Oral Tablet"|"76272"|"Schizoaffective Disorder"|"14"|"0.933333"  
"13099"|"Benzotropine Mesylate 1 MG Oral Tablet"|"76273"|"Bipolar Schizoaffective Disorder"|"2"|"1"  
"13099"|"Benzotropine Mesylate 1 MG Oral Tablet"|"76276"|"Schizoaffective Disorder - Chronic (With Residual Symptoms)"|"2"|"0.666667"  
"13099"|"Benzotropine Mesylate 1 MG Oral Tablet"|"76363"|"Major Depression, Recurrent With Psychotic Features"|"3"|"0.75"  
"13099"|"Benzotropine Mesylate 1 MG Oral Tablet"|"76388"|"Bipolar Disorder NOS"|"3"|"0.6"  
"13100"|"Benzotropine Mesylate 2 MG Oral Tablet"|"76213"|"Schizophrenia"|"2"|"0.4"  
"13100"|"Benzotropine Mesylate 2 MG Oral Tablet"|"76232"|"Paranoid Schizophrenia"|"3"|"0.75"  
"13100"|"Benzotropine Mesylate 2 MG Oral Tablet"|"76238"|"Paranoid Schizophrenia, Stable"|"5"|"1"  
"13100"|"Benzotropine Mesylate 2 MG Oral Tablet"|"76272"|"Schizoaffective Disorder"|"3"|"1"  
"13100"|"Benzotropine Mesylate 2 MG Oral Tablet"|"76363"|"Major Depression, Recurrent With Psychotic Features"|"2"|"1"  
"13110"|"Betamethasone Dipropionate 0.05 % External Lotion"|"65954"|"Phimosis"|"2"|"1"  
"13115"|"Betaseron 0.3 MG Subcutaneous Solution Reconstituted"|"75125"|"Multiple Sclerosis"|"14"|"0.333333"  
"13229"|"Calcium 1500 MG Oral Tablet"|"69341"|"Osteoporosis"|"2"|"0.666667"  
"13270"|"Baclofen 20 MG Oral Tablet"|"75125"|"Multiple Sclerosis"|"11"|"0.458333"  
"13270"|"Baclofen 20 MG Oral Tablet"|"75811"|"Muscle Spasm"|"2"|"0.5"  
"13270"|"Baclofen 20 MG Oral Tablet"|"201177"|"Quadriplegic Cerebral Palsy With Spasticity"|"2"|"1"  
"13278"|"Calcium Carbonate 1250 MG/5ML Oral Suspension"|"274672"|"Chronic Kidney Disease, Stage 4"|"2"|"0.666667"  
"13294"|"Calmoseptine 0.44-20.625 % External Ointment"|"191631"|"Gastrostomy Care"|"3"|"0.2"  
"13448"|"Cheratussin AC 100-10 MG/5ML Oral Syrup"|"60869"|"Cough"|"87"|"0.587838"  
"13448"|"Cheratussin AC 100-10 MG/5ML Oral Syrup"|"62578"|"Acute Sinusitis"|"11"|"0.215686"  
"13448"|"Cheratussin AC 100-10 MG/5ML Oral Syrup"|"62580"|"Acute Maxillary Sinusitis"|"2"|"0.333333"  
"13448"|"Cheratussin AC 100-10 MG/5ML Oral Syrup"|"62596"|"Common Cold"|"3"|"0.5"  
"13448"|"Cheratussin AC 100-10 MG/5ML Oral Syrup"|"64118"|"Acute Bronchitis"|"65"|"0.663265"  
"13448"|"Cheratussin AC 100-10 MG/5ML Oral Syrup"|"64119"|"Influenza"|"2"|"0.333333"  
"13448"|"Cheratussin AC 100-10 MG/5ML Oral Syrup"|"64180"|"Reactive Airway Disease"|"2"|"0.222222"  
"13448"|"Cheratussin AC 100-10 MG/5ML Oral Syrup"|"64206"|"Chronic Bronchitis"|"3"|"0.428571"  
"13448"|"Cheratussin AC 100-10 MG/5ML Oral Syrup"|"76868"|"Viral Syndrome"|"2"|"0.4"  
"13448"|"Cheratussin AC 100-10 MG/5ML Oral Syrup"|"77890"|"Upper Respiratory Infection"|"11"|"0.22449"  
"13448"|"Cheratussin AC 100-10 MG/5ML Oral Syrup"|"77891"|"Acute Upper Respiratory Infection"|"57"|"0.456"

"13448""Cheratussin AC 100-10 MG/5ML Oral Syrup""166748""Asthma With Acute Exacerbation""2""0.4"  
"13448""Cheratussin AC 100-10 MG/5ML Oral Syrup""258835""Bronchitis""6""0.315789"  
"13448""Cheratussin AC 100-10 MG/5ML Oral Syrup""297216""Acute Nasopharyngitis""5""1"  
"13485""Chloral Hydrate 500 MG/5ML Oral Syrup""275496""Autistic Disorder""2""0.666667"  
"13497""Chloroquine Phosphate 500 MG Oral Tablet""296447""Preventive Medicine Counseling About  
Travel""3""1"  
"13505""ChlorproMAZINE HCl 10 MG Oral Tablet""87088""Hiccups (Symptom)""3""1"  
"13507""ChlorproMAZINE HCl 50 MG Oral Tablet""76272""Schizoaffective Disorder""3""1"  
"13510""Chlorthalidone 50 MG Oral Tablet""63470""Benign Essential Hypertension""2""1"  
"13511""Chlorzoxazone 500 MG Oral Tablet""31947""Lumbago""3""0.75"  
"13546""Benztropine Mesylate 0.5 MG Oral Tablet""76213""Schizophrenia""3""1"  
"13546""Benztropine Mesylate 0.5 MG Oral Tablet""76232""Paranoid Schizophrenia""3""0.75"  
"13546""Benztropine Mesylate 0.5 MG Oral Tablet""76234""Paranoid Schizophrenia, Chronic""3""1"  
"13546""Benztropine Mesylate 0.5 MG Oral Tablet""76238""Paranoid Schizophrenia, Stable""3""1"  
"13546""Benztropine Mesylate 0.5 MG Oral Tablet""76272""Schizoaffective Disorder""2""1"  
"13546""Benztropine Mesylate 0.5 MG Oral Tablet""76363""Major Depression, Recurrent With Psychotic  
Features""3""0.75"  
"13546""Benztropine Mesylate 0.5 MG Oral Tablet""76388""Bipolar Disorder NOS""4""1"  
"13546""Benztropine Mesylate 0.5 MG Oral Tablet""275496""Autistic Disorder""2""0.5"  
"13562""Betamethasone Dipropionate 0.05 % External Cream""69901""Psoriasis""2""1"  
"13562""Betamethasone Dipropionate 0.05 % External Cream""70112""Atopic Dermatitis""2""0.666667"  
"13571""Bethanechol Chloride 10 MG Oral Tablet""64688""Esophageal Reflux""6""0.545455"  
"13572""Bethanechol Chloride 5 MG Oral Tablet""64688""Esophageal Reflux""4""0.5"  
"13588""Bisacodyl 10 MG Rectal Suppository""65055""Chronic Constipation""4""0.8"  
"13588""Bisacodyl 10 MG Rectal Suppository""166777""Constipation""8""0.615385"  
"13613""Botox 100 UNIT SOLR""75108""Spasmodic Torticollis""4""0.666667"  
"13613""Botox 100 UNIT SOLR""75119""Blepharospasm""3""0.75"  
"13613""Botox 100 UNIT SOLR""75121""Torticollis""2""1"  
"13613""Botox 100 UNIT SOLR""75811""Muscle Spasm""2""0.4"  
"13638""Clidinium-Chlordiazepoxide 2.5-5 MG Oral Capsule""65076""Irritable Bowel Syndrome""4""0.8"  
"13640""Clindamycin HCl 150 MG Oral Capsule""69999""Cellulitis""6""0.461538"  
"13640""Clindamycin HCl 150 MG Oral Capsule""70029""Furuncle""3""0.75"  
"13640""Clindamycin HCl 150 MG Oral Capsule""82363""Open Wound Of The Left Leg""3""1"  
"13640""Clindamycin HCl 150 MG Oral Capsule""168613""Cellulitis Of The Left Leg""2""1"  
"13648""CloNIDine HCl 0.1 MG Oral Tablet""31947""Lumbago""2""0.333333"  
"13648""CloNIDine HCl 0.1 MG Oral Tablet""60984""Sudden Redness Of The Skin (Flushing)""3""1"  
"13648""CloNIDine HCl 0.1 MG Oral Tablet""61108""Insomnia""7""0.28"  
"13648""CloNIDine HCl 0.1 MG Oral Tablet""63467""Hypertension""55""0.255814"  
"13648""CloNIDine HCl 0.1 MG Oral Tablet""63468""Essential Hypertension""24""0.32"  
"13648""CloNIDine HCl 0.1 MG Oral Tablet""63470""Benign Essential Hypertension""27""0.364865"  
"13648""CloNIDine HCl 0.1 MG Oral Tablet""63471""Accelerated Essential Hypertension""4""0.333333"  
"13648""CloNIDine HCl 0.1 MG Oral Tablet""75818""Attention-deficit Hyperactivity Disorder""14""0.451613"  
"13648""CloNIDine HCl 0.1 MG Oral Tablet""75834""Disruptive Behavior Disorder""3""0.428571"  
"13648""CloNIDine HCl 0.1 MG Oral Tablet""75873""Tourette's Syndrome""2""0.666667"  
"13648""CloNIDine HCl 0.1 MG Oral Tablet""76669""Impulse Control Disorder""2""0.4"  
"13648""CloNIDine HCl 0.1 MG Oral Tablet""257912""Disorder Of Mitochondrial Metabolism""2""0.25"  
"13648""CloNIDine HCl 0.1 MG Oral Tablet""275486""ADHD, Combined Type""37""0.755102"  
"13648""CloNIDine HCl 0.1 MG Oral Tablet""275492""ADHD, Predominantly Hyperactive - Impulsive""4""0.5"  
"13648""CloNIDine HCl 0.1 MG Oral Tablet""275496""Autistic Disorder""4""0.16"  
"13648""CloNIDine HCl 0.1 MG Oral Tablet""275592""Post-traumatic Stress Disorder""2""0.4"  
"13649""CloNIDine HCl 0.2 MG Oral Tablet""63467""Hypertension""23""0.242105"  
"13649""CloNIDine HCl 0.2 MG Oral Tablet""63468""Essential Hypertension""5""0.16129"  
"13649""CloNIDine HCl 0.2 MG Oral Tablet""63470""Benign Essential Hypertension""16""0.457143"  
"13649""CloNIDine HCl 0.2 MG Oral Tablet""76306""Episodic Mood Disorders""2""0.666667"

"13650"|"CloNIDine HCl 0.3 MG Oral Tablet"|"63467"|"Hypertension"|"19"|"0.327586"  
"13650"|"CloNIDine HCl 0.3 MG Oral Tablet"|"63468"|"Essential Hypertension"|"12"|"0.413793"  
"13650"|"CloNIDine HCl 0.3 MG Oral Tablet"|"63470"|"Benign Essential Hypertension"|"11"|"0.478261"  
"13652"|"Clotrimazole 1 % External Cream"|"69847"|"Papular Urticaria"|"2"|"0.4"  
"13652"|"Clotrimazole 1 % External Cream"|"70115"|"Dermatophytosis"|"9"|"0.428571"  
"13652"|"Clotrimazole 1 % External Cream"|"70116"|"Tinea Capitis"|"5"|"0.185185"  
"13652"|"Clotrimazole 1 % External Cream"|"70121"|"Tinea Cruris"|"6"|"0.857143"  
"13652"|"Clotrimazole 1 % External Cream"|"70122"|"Tinea Pedis"|"16"|"0.8"  
"13652"|"Clotrimazole 1 % External Cream"|"70124"|"Tinea Corporis"|"82"|"0.700855"  
"13652"|"Clotrimazole 1 % External Cream"|"70126"|"Tinea Versicolor"|"3"|"0.5"  
"13652"|"Clotrimazole 1 % External Cream"|"70130"|"Diaper Rash"|"4"|"0.25"  
"13652"|"Clotrimazole 1 % External Cream"|"77205"|"Candidiasis"|"6"|"0.3"  
"13652"|"Clotrimazole 1 % External Cream"|"77210"|"Cutaneous Candidiasis"|"4"|"0.4"  
"13652"|"Clotrimazole 1 % External Cream"|"77216"|"Genitourinary Candidiasis"|"2"|"0.4"  
"13652"|"Clotrimazole 1 % External Cream"|"93705"|"Dermatitis"|"3"|"0.136364"  
"13652"|"Clotrimazole 1 % External Cream"|"168628"|"Tinea Facialis"|"7"|"0.583333"  
"13652"|"Clotrimazole 1 % External Cream"|"168632"|"Tinea Cruris Of The Groin"|"7"|"0.875"  
"13652"|"Clotrimazole 1 % External Cream"|"173522"|"Candidal Intertrigo"|"5"|"0.555556"  
"13652"|"Clotrimazole 1 % External Cream"|"173525"|"Candidal Balanitis"|"3"|"0.75"  
"13665"|"Codeine Phosphate Powder"|"260898"|"Kidney Cancer"|"2"|"1"  
"13683"|"Bromfed DM 30-2-10 MG/5ML Oral Syrup"|"60869"|"Cough"|"4"|"0.571429"  
"13683"|"Bromfed DM 30-2-10 MG/5ML Oral Syrup"|"77891"|"Acute Upper Respiratory Infection"|"9"|"0.5625"  
"13728"|"Colchicine 0.6 MG TABS"|"70384"|"Gout"|"43"|"0.518072"  
"13728"|"Colchicine 0.6 MG TABS"|"70386"|"Acute Gout"|"12"|"0.461538"  
"13728"|"Colchicine 0.6 MG TABS"|"70387"|"Chronic Gout"|"21"|"0.636364"  
"13728"|"Colchicine 0.6 MG TABS"|"70388"|"Chronic Tophaceous Gout"|"4"|"0.571429"  
"13807"|"Capsaicin 0.025 % External Cream"|"288921"|"Chronic Pain"|"2"|"1"  
"13810"|"CarBAMazepine 100 MG Oral Tablet Chewable"|"74988"|"Seizure Disorder"|"5"|"0.555556"  
"13810"|"CarBAMazepine 100 MG Oral Tablet Chewable"|"75125"|"Multiple Sclerosis"|"2"|"0.666667"  
"13810"|"CarBAMazepine 100 MG Oral Tablet Chewable"|"75486"|"Trigeminal Neuralgia"|"4"|"0.666667"  
"13811"|"CarBAMazepine 100 MG/5ML Oral Suspension"|"74988"|"Seizure Disorder"|"6"|"0.857143"  
"13812"|"CarBAMazepine 200 MG Oral Tablet"|"61040"|"Convulsions"|"2"|"0.666667"  
"13812"|"CarBAMazepine 200 MG Oral Tablet"|"74988"|"Seizure Disorder"|"13"|"0.448276"  
"13812"|"CarBAMazepine 200 MG Oral Tablet"|"75002"|"Partial Complex Psychomotor Seizure With Intractable Seizure"|"5"|"0.714286"  
"13812"|"CarBAMazepine 200 MG Oral Tablet"|"75125"|"Multiple Sclerosis"|"2"|"0.222222"  
"13812"|"CarBAMazepine 200 MG Oral Tablet"|"75486"|"Trigeminal Neuralgia"|"3"|"0.6"  
"13812"|"CarBAMazepine 200 MG Oral Tablet"|"75488"|"Glossopharyngeal Neuralgia"|"2"|"1"  
"13812"|"CarBAMazepine 200 MG Oral Tablet"|"76272"|"Schizoaffective Disorder"|"2"|"0.666667"  
"13812"|"CarBAMazepine 200 MG Oral Tablet"|"76325"|"Bipolar I Disorder, Most Recent Episode, Mixed - Moderate"|"2"|"1"  
"13812"|"CarBAMazepine 200 MG Oral Tablet"|"76388"|"Bipolar Disorder NOS"|"2"|"0.285714"  
"13812"|"CarBAMazepine 200 MG Oral Tablet"|"252546"|"Generalized Convulsive Seizure"|"2"|"0.5"  
"13812"|"CarBAMazepine 200 MG Oral Tablet"|"252566"|"Partial Complex Seizure"|"9"|"0.75"  
"13812"|"CarBAMazepine 200 MG Oral Tablet"|"288819"|"Fasciculations"|"2"|"1"  
"13812"|"CarBAMazepine 200 MG Oral Tablet"|"297231"|"Epilepsy"|"3"|"0.5"  
"13813"|"Carbamide Peroxide 6.5 % Otic Solution"|"62409"|"Cerumen Impaction"|"20"|"0.740741"  
"13813"|"Carbamide Peroxide 6.5 % Otic Solution"|"62412"|"Cerumen Impaction In Both Ears"|"6"|"0.857143"  
"13813"|"Carbamide Peroxide 6.5 % Otic Solution"|"62522"|"Hearing Loss"|"2"|"0.4"  
"13832"|"Cortef 5 MG Oral Tablet"|"69464"|"Congenital Adrenal Hyperplasia"|"4"|"0.666667"  
"13832"|"Cortef 5 MG Oral Tablet"|"69465"|"21-hydroxylase Deficiency (Salt Losing)"|"2"|"0.666667"  
"13883"|"Carisoprodol 350 MG Oral Tablet"|"73464"|"Lower Back Sprain"|"2"|"1"  
"13883"|"Carisoprodol 350 MG Oral Tablet"|"73666"|"Backache"|"9"|"0.6"  
"13883"|"Carisoprodol 350 MG Oral Tablet"|"75121"|"Torticollis"|"2"|"1"

"13883"|"Carisoprodol 350 MG Oral Tablet"|"75811"|"Muscle Spasm"|"7"|"0.636364"  
"13883"|"Carisoprodol 350 MG Oral Tablet"|"85691"|"Neck Pain"|"3"|"0.5"  
"13883"|"Carisoprodol 350 MG Oral Tablet"|"85701"|"Joint Pain, Localized In The Shoulder"|"2"|"0.5"  
"13883"|"Carisoprodol 350 MG Oral Tablet"|"91089"|"Lower Back Pain"|"10"|"0.4"  
"13883"|"Carisoprodol 350 MG Oral Tablet"|"172086"|"Lumbar Strain"|"2"|"0.666667"  
"13883"|"Carisoprodol 350 MG Oral Tablet"|"278691"|"Lumbar Facet Syndrome"|"2"|"0.5"  
"13883"|"Carisoprodol 350 MG Oral Tablet"|"288921"|"Chronic Pain"|"4"|"0.222222"  
"13883"|"Carisoprodol 350 MG Oral Tablet"|"288977"|"Fibromyalgia"|"4"|"0.571429"  
"13885"|"Carisoprodol-Aspirin 200-325 MG Oral Tablet"|"75125"|"Multiple Sclerosis"|"2"|"1"  
"13899"|"Catapres-TTS-3 0.3 MG/24HR Transdermal Patch Weekly"|"63470"|"Benign Essential Hypertension"|"2"|"0.285714"  
"13905"|"Cyclobenzaprine HCl 10 MG Oral Tablet"|"31947"|"Lumbago"|"20"|"0.307692"  
"13905"|"Cyclobenzaprine HCl 10 MG Oral Tablet"|"70146"|"Osteoarthritis"|"10"|"0.192308"  
"13905"|"Cyclobenzaprine HCl 10 MG Oral Tablet"|"70193"|"Localized Osteoarthritis Of The Knee"|"2"|"0.5"  
"13905"|"Cyclobenzaprine HCl 10 MG Oral Tablet"|"70455"|"Rheumatoid Arthritis"|"19"|"0.404255"  
"13905"|"Cyclobenzaprine HCl 10 MG Oral Tablet"|"70704"|"Symmetric Polyarticular Inflammation"|"3"|"0.5"  
"13905"|"Cyclobenzaprine HCl 10 MG Oral Tablet"|"70706"|"Ankylosing Spondylitis"|"6"|"1"  
"13905"|"Cyclobenzaprine HCl 10 MG Oral Tablet"|"70719"|"Psoriatic Arthropathy"|"3"|"1"  
"13905"|"Cyclobenzaprine HCl 10 MG Oral Tablet"|"73403"|"Neck Sprain"|"7"|"0.583333"  
"13905"|"Cyclobenzaprine HCl 10 MG Oral Tablet"|"73454"|"Lumbar Sprain"|"4"|"1"  
"13905"|"Cyclobenzaprine HCl 10 MG Oral Tablet"|"73458"|"Chronic Strained Lumbosacral Ligament"|"2"|"1"  
"13905"|"Cyclobenzaprine HCl 10 MG Oral Tablet"|"73464"|"Lower Back Sprain"|"8"|"0.444444"  
"13905"|"Cyclobenzaprine HCl 10 MG Oral Tablet"|"73466"|"Hip Sprain"|"3"|"0.75"  
"13905"|"Cyclobenzaprine HCl 10 MG Oral Tablet"|"73549"|"Unspecified Muscle Strain"|"4"|"0.666667"  
"13905"|"Cyclobenzaprine HCl 10 MG Oral Tablet"|"73666"|"Backache"|"23"|"0.25"  
"13905"|"Cyclobenzaprine HCl 10 MG Oral Tablet"|"73695"|"Cervical Spondylosis"|"3"|"0.428571"  
"13905"|"Cyclobenzaprine HCl 10 MG Oral Tablet"|"74530"|"Tension-type Headache"|"3"|"0.103448"  
"13905"|"Cyclobenzaprine HCl 10 MG Oral Tablet"|"75108"|"Spasmodic Torticollis"|"2"|"0.666667"  
"13905"|"Cyclobenzaprine HCl 10 MG Oral Tablet"|"75579"|"Spondylosis Without Myelopathy"|"3"|"0.5"  
"13905"|"Cyclobenzaprine HCl 10 MG Oral Tablet"|"75588"|"Cervical Spine Stenosis"|"2"|"0.25"  
"13905"|"Cyclobenzaprine HCl 10 MG Oral Tablet"|"75717"|"Cervicalgia"|"28"|"0.35443"  
"13905"|"Cyclobenzaprine HCl 10 MG Oral Tablet"|"75728"|"Sciatica"|"7"|"0.233333"  
"13905"|"Cyclobenzaprine HCl 10 MG Oral Tablet"|"75811"|"Muscle Spasm"|"45"|"0.584416"  
"13905"|"Cyclobenzaprine HCl 10 MG Oral Tablet"|"75812"|"Myalgia And Myositis"|"12"|"0.324324"  
"13905"|"Cyclobenzaprine HCl 10 MG Oral Tablet"|"83212"|"Diffuse Idiopathic Skeletal Hyperostosis (DISH)"|"2"|"0.5"  
"13905"|"Cyclobenzaprine HCl 10 MG Oral Tablet"|"85614"|"Joint Pain, Localized In The Hip"|"3"|"0.107143"  
"13905"|"Cyclobenzaprine HCl 10 MG Oral Tablet"|"85623"|"Joint Pain, Localized In The Knee"|"6"|"0.103448"  
"13905"|"Cyclobenzaprine HCl 10 MG Oral Tablet"|"85634"|"Muscle Cramps In The Calf"|"2"|"0.285714"  
"13905"|"Cyclobenzaprine HCl 10 MG Oral Tablet"|"85638"|"Ankle Joint Pain"|"3"|"0.166667"  
"13905"|"Cyclobenzaprine HCl 10 MG Oral Tablet"|"85691"|"Neck Pain"|"13"|"0.464286"  
"13905"|"Cyclobenzaprine HCl 10 MG Oral Tablet"|"85707"|"Back Pain"|"3"|"0.333333"  
"13905"|"Cyclobenzaprine HCl 10 MG Oral Tablet"|"90945"|"Joint Pain, Localized In The Right Shoulder"|"3"|"0.75"  
"13905"|"Cyclobenzaprine HCl 10 MG Oral Tablet"|"90952"|"Joint Pain, Localized In The Left Shoulder"|"4"|"0.266667"  
"13905"|"Cyclobenzaprine HCl 10 MG Oral Tablet"|"91056"|"Upper Back Pain (Between Shoulder Blades)"|"10"|"0.5"  
"13905"|"Cyclobenzaprine HCl 10 MG Oral Tablet"|"91079"|"Midback Pain"|"2"|"0.4"  
"13905"|"Cyclobenzaprine HCl 10 MG Oral Tablet"|"91089"|"Lower Back Pain"|"85"|"0.551948"  
"13905"|"Cyclobenzaprine HCl 10 MG Oral Tablet"|"115846"|"Back Muscle Spasm"|"14"|"0.583333"  
"13905"|"Cyclobenzaprine HCl 10 MG Oral Tablet"|"172080"|"Neck Strain"|"6"|"0.545455"  
"13905"|"Cyclobenzaprine HCl 10 MG Oral Tablet"|"172086"|"Lumbar Strain"|"15"|"0.652174"  
"13905"|"Cyclobenzaprine HCl 10 MG Oral Tablet"|"172631"|"Herniated Lumbar Disc"|"2"|"0.285714"  
"13905"|"Cyclobenzaprine HCl 10 MG Oral Tablet"|"251467"|"Limb Pain"|"8"|"0.181818"  
"13905"|"Cyclobenzaprine HCl 10 MG Oral Tablet"|"275258"|"Cervical Spasm"|"2"|"1"

"13905""Cyclobenzaprine HCl 10 MG Oral Tablet""278685""Arthralgias In Multiple Sites""6""0.25"  
"13905""Cyclobenzaprine HCl 10 MG Oral Tablet""278688""Trapezoid Muscle Strain""4""0.5"  
"13905""Cyclobenzaprine HCl 10 MG Oral Tablet""288921""Chronic Pain""3""0.176471"  
"13905""Cyclobenzaprine HCl 10 MG Oral Tablet""288977""Fibromyalgia""17""0.395349"  
"13905""Cyclobenzaprine HCl 10 MG Oral Tablet""291525""Impingement Of The Right Shoulder""2""1"  
"13912""Cyproheptadine HCl 2 MG/5ML Oral Syrup""60879""Decrease In Appetite""4""0.571429"  
"13912""Cyproheptadine HCl 2 MG/5ML Oral Syrup""60880""Appetite Lost (Anorexia)""8""1"  
"13912""Cyproheptadine HCl 2 MG/5ML Oral Syrup""60895""Vomiting (Symptom)""2""0.222222"  
"13912""Cyproheptadine HCl 2 MG/5ML Oral Syrup""64688""Esophageal Reflux""4""0.1"  
"13912""Cyproheptadine HCl 2 MG/5ML Oral Syrup""75868""Feeding Disorder Of Infancy / Early  
Childhood""7""0.411765"  
"13912""Cyproheptadine HCl 2 MG/5ML Oral Syrup""76442""Failure To Thrive In Childhood""43""0.632353"  
"13912""Cyproheptadine HCl 2 MG/5ML Oral Syrup""98801""Weight - Too Thin""4""0.8"  
"13912""Cyproheptadine HCl 2 MG/5ML Oral Syrup""278172""Infant Feeding Problems""6""0.545455"  
"13912""Cyproheptadine HCl 2 MG/5ML Oral Syrup""283277""Abnormal Weight Loss""2""0.333333"  
"13912""Cyproheptadine HCl 2 MG/5ML Oral Syrup""283296""Abnormal Weight Gain""2""0.5"  
"13912""Cyproheptadine HCl 2 MG/5ML Oral Syrup""296919""Failure To Thrive As Newborn""2""1"  
"13913""Cyproheptadine HCl 4 MG Oral Tablet""60879""Decrease In Appetite""2""1"  
"13913""Cyproheptadine HCl 4 MG Oral Tablet""62598""Allergic Rhinitis""3""0.5"  
"13913""Cyproheptadine HCl 4 MG Oral Tablet""76442""Failure To Thrive In Childhood""4""0.666667"  
"13968""Dapsone 100 MG Oral Tablet""70472""Systemic Lupus Erythematosus""2""0.666667"  
"13968""Dapsone 100 MG Oral Tablet""76835""HIV Infection""8""0.571429"  
"13968""Dapsone 100 MG Oral Tablet""76842""Acquired Immunodeficiency Syndrome (AIDS)""2""1"  
"14069""Depakote 500 MG Oral Tablet Delayed Release""61040""Convulsions""2""1"  
"14069""Depakote 500 MG Oral Tablet Delayed Release""74988""Seizure Disorder""2""0.2"  
"14069""Depakote 500 MG Oral Tablet Delayed Release""76234""Paranoid Schizophrenia, Chronic""2""1"  
"14099""Desonide 0.05 % External Cream""70112""Atopic Dermatitis""5""0.625"  
"14099""Desonide 0.05 % External Cream""278350""Eczema""3""0.6"  
"14117""Dexamethasone 6 MG Oral Tablet""75124""Demyelinating Disorders""3""0.428571"  
"14117""Dexamethasone 6 MG Oral Tablet""75125""Multiple Sclerosis""8""0.470588"  
"14118""Dexamethasone Sodium Phosphate 10 MG/ML Injection Solution""62598""Allergic  
Rhinitis""2""0.666667"  
"14120""Dexamethasone Sodium Phosphate 0.1 % Ophthalmic Solution""62586""Chronic Maxillary  
Sinusitis""5""0.25"  
"14120""Dexamethasone Sodium Phosphate 0.1 % Ophthalmic Solution""62587""Chronic Frontal  
Sinusitis""11""0.44"  
"14120""Dexamethasone Sodium Phosphate 0.1 % Ophthalmic Solution""62588""Chronic Ethmoidal  
Sinusitis""14""0.5"  
"14120""Dexamethasone Sodium Phosphate 0.1 % Ophthalmic Solution""62591""Nasal Polyps""4""0.266667"  
"14171""Dilantin 100 MG Oral Capsule""61040""Convulsions""3""0.5"  
"14171""Dilantin 100 MG Oral Capsule""74988""Seizure Disorder""6""0.130435"  
"14171""Dilantin 100 MG Oral Capsule""75000""Partial Simple Seizure With Intractable Seizure""2""1"  
"14171""Dilantin 100 MG Oral Capsule""75001""Partial Complex Psychomotor Seizure""2""0.4"  
"14171""Dilantin 100 MG Oral Capsule""75002""Partial Complex Psychomotor Seizure With Intractable  
Seizure""4""0.285714"  
"14171""Dilantin 100 MG Oral Capsule""75125""Multiple Sclerosis""2""0.5"  
"14171""Dilantin 100 MG Oral Capsule""252550""Generalized Convulsive Tonic Seizure With Intractable  
Seizure""2""0.5"  
"14171""Dilantin 100 MG Oral Capsule""252569""Partial Complex Seizure With Secondary  
Generalization""2""0.5"  
"14171""Dilantin 100 MG Oral Capsule""252570""Partial Complex Seizure With Secondary Generalization With  
Intractable Seizure""3""0.333333"  
"14187""Cheratussin DAC 30-10-100 MG/5ML Oral Solution""60869""Cough""6""0.666667"  
"14248""DiphenhydrAMINE HCl 25 MG Oral Capsule""62598""Allergic Rhinitis""5""0.625"

"14248"|"DiphenhydrAMINE HCl 25 MG Oral Capsule"|"76238"|"Paranoid Schizophrenia, Stable"|"2"|"1"  
"14249"|"DiphenhydrAMINE HCl 25 MG Oral Tablet"|"61108"|"Insomnia"|"2"|"0.333333"  
"14249"|"DiphenhydrAMINE HCl 25 MG Oral Tablet"|"69710"|"Contact Dermatitis"|"5"|"0.833333"  
"14249"|"DiphenhydrAMINE HCl 25 MG Oral Tablet"|"76232"|"Paranoid Schizophrenia"|"2"|"1"  
"14249"|"DiphenhydrAMINE HCl 25 MG Oral Tablet"|"76272"|"Schizoaffective Disorder"|"4"|"1"  
"14249"|"DiphenhydrAMINE HCl 25 MG Oral Tablet"|"88375"|"Skin: A Rash"|"2"|"0.666667"  
"14249"|"DiphenhydrAMINE HCl 25 MG Oral Tablet"|"275604"|"Depression With Anxiety"|"2"|"0.666667"  
"14250"|"Diphenoxylate-Atropine 2.5-0.025 MG Oral Tablet"|"60902"|"Diarrhea (Symptom)"|"23"|"0.589744"  
"14250"|"Diphenoxylate-Atropine 2.5-0.025 MG Oral Tablet"|"64579"|"Gastroenteritis"|"3"|"0.333333"  
"14250"|"Diphenoxylate-Atropine 2.5-0.025 MG Oral Tablet"|"64621"|"Infectious Gastroenteritis"|"6"|"1"  
"14250"|"Diphenoxylate-Atropine 2.5-0.025 MG Oral Tablet"|"65062"|"Colonic Diverticulosis"|"2"|"0.666667"  
"14250"|"Diphenoxylate-Atropine 2.5-0.025 MG Oral Tablet"|"65076"|"Irritable Bowel Syndrome"|"4"|"0.571429"  
"14250"|"Diphenoxylate-Atropine 2.5-0.025 MG Oral Tablet"|"65077"|"Functional Diarrhea"|"3"|"0.75"  
"14250"|"Diphenoxylate-Atropine 2.5-0.025 MG Oral Tablet"|"75881"|"Encopresis"|"2"|"1"  
"14250"|"Diphenoxylate-Atropine 2.5-0.025 MG Oral Tablet"|"260319"|"Colon Cancer"|"2"|"0.5"  
"14250"|"Diphenoxylate-Atropine 2.5-0.025 MG Oral Tablet"|"260898"|"Kidney Cancer"|"2"|"0.666667"  
"14259"|"Dipyridamole 75 MG Oral Tablet"|"62975"|"Coronary Artery Disease"|"2"|"0.333333"  
"14283"|"ChlorproMAZINE HCl 25 MG Oral Tablet"|"87088"|"Hiccups (Symptom)"|"2"|"1"  
"14285"|"Chlorthalidone 25 MG Oral Tablet"|"63467"|"Hypertension"|"5"|"0.357143"  
"14285"|"Chlorthalidone 25 MG Oral Tablet"|"63468"|"Essential Hypertension"|"4"|"0.333333"  
"14285"|"Chlorthalidone 25 MG Oral Tablet"|"63470"|"Benign Essential Hypertension"|"6"|"0.75"  
"14327"|"Docusate Sodium 60 MG/15ML Oral Syrup"|"65055"|"Chronic Constipation"|"2"|"1"  
"14327"|"Docusate Sodium 60 MG/15ML Oral Syrup"|"166777"|"Constipation"|"3"|"0.75"  
"14328"|"Docusate Sodium 100 MG Oral Tablet"|"166777"|"Constipation"|"6"|"0.75"  
"14342"|"Doxepin HCl 50 MG Oral Capsule"|"61029"|"Itching (Pruritus)"|"2"|"1"  
"14342"|"Doxepin HCl 50 MG Oral Capsule"|"76351"|"Depression"|"8"|"0.727273"  
"14342"|"Doxepin HCl 50 MG Oral Capsule"|"76357"|"Major Depression, Recurrent"|"2"|"1"  
"14369"|"Clindamycin Phosphate 1 % External Solution"|"69606"|"Acne"|"10"|"0.666667"  
"14374"|"Clomid 50 MG Oral Tablet"|"66274"|"Female Infertility"|"2"|"0.666667"  
"14375"|"ClomiPHENE Citrate 50 MG Oral Tablet"|"66015"|"Ovarian Disorders"|"8"|"0.888889"  
"14375"|"ClomiPHENE Citrate 50 MG Oral Tablet"|"66016"|"Oligomenorrhea"|"3"|"0.5"  
"14375"|"ClomiPHENE Citrate 50 MG Oral Tablet"|"66139"|"Amenorrhea"|"3"|"0.3"  
"14375"|"ClomiPHENE Citrate 50 MG Oral Tablet"|"66274"|"Female Infertility"|"22"|"0.814815"  
"14375"|"ClomiPHENE Citrate 50 MG Oral Tablet"|"66702"|"Habitual Aborter (Non-gravid)"|"2"|"0.5"  
"14375"|"ClomiPHENE Citrate 50 MG Oral Tablet"|"69547"|"Inadequate Luteal Phase"|"2"|"1"  
"14375"|"ClomiPHENE Citrate 50 MG Oral Tablet"|"69549"|"Polycystic Ovarian Syndrome"|"36"|"0.734694"  
"14375"|"ClomiPHENE Citrate 50 MG Oral Tablet"|"69569"|"Male Infertility"|"2"|"0.4"  
"14375"|"ClomiPHENE Citrate 50 MG Oral Tablet"|"69588"|"Hypogonadism"|"2"|"1"  
"14375"|"ClomiPHENE Citrate 50 MG Oral Tablet"|"88042"|"Irregular Length Of Menstrual Periods"|"2"|"1"  
"14375"|"ClomiPHENE Citrate 50 MG Oral Tablet"|"167207"|"Primary Female Infertility"|"2"|"0.666667"  
"14375"|"ClomiPHENE Citrate 50 MG Oral Tablet"|"168513"|"Hypogonadotrophic Hypogonadism"|"3"|"1"  
"14375"|"ClomiPHENE Citrate 50 MG Oral Tablet"|"288778"|"Female Infertility Associated With Anovulation"|"6"|"0.857143"  
"14376"|"ClomiPRAMINE HCl 50 MG Oral Capsule"|"76546"|"Obsessive Compulsive Disorder"|"3"|"1"  
"14380"|"Clotrimazole 1 % External Solution"|"62322"|"Otitis Externa"|"2"|"0.666667"  
"14538"|"Colace 100 MG Oral Capsule"|"166777"|"Constipation"|"6"|"0.4"  
"14538"|"Colace 100 MG Oral Capsule"|"251467"|"Limb Pain"|"5"|"0.5"  
"14539"|"Colace 50 MG Oral Capsule"|"65055"|"Chronic Constipation"|"2"|"1"  
"14580"|"Erythromycin 5 MG/GM Ophthalmic Ointment"|"61321"|"Stye"|"2"|"1"  
"14580"|"Erythromycin 5 MG/GM Ophthalmic Ointment"|"61417"|"Conjunctivitis"|"7"|"0.583333"  
"14580"|"Erythromycin 5 MG/GM Ophthalmic Ointment"|"61418"|"Acute Conjunctivitis"|"15"|"0.714286"  
"14580"|"Erythromycin 5 MG/GM Ophthalmic Ointment"|"166478"|"Acute Bacterial Conjunctivitis"|"3"|"0.75"  
"14580"|"Erythromycin 5 MG/GM Ophthalmic Ointment"|"287531"|"Lacrimal Stenosis Of The Right Eye"|"2"|"1"  
"14580"|"Erythromycin 5 MG/GM Ophthalmic Ointment"|"287562"|"Acute Conjunctivitis Of Both Eyes"|"3"|"1"

"14652"|"Ferrous Gluconate 324 (38 Fe) MG Oral Tablet"|"77962"|"Anemia"|"2"|"0.666667"  
"14653"|"Ferrous Gluconate 325 MG TABS"|"77962"|"Anemia"|"5"|"0.714286"  
"14653"|"Ferrous Gluconate 325 MG TABS"|"77969"|"Iron Deficiency Anemia Secondary To Chronic Blood Loss"|"2"|"1"  
"14655"|"Ferrous Sulfate 300 (60 Fe) MG/5ML Oral Syrup"|"76442"|"Failure To Thrive In Childhood"|"2"|"0.4"  
"14655"|"Ferrous Sulfate 300 (60 Fe) MG/5ML Oral Syrup"|"77962"|"Anemia"|"9"|"0.5625"  
"14658"|"Ferrous Sulfate 325 (65 Fe) MG Oral Tablet"|"64980"|"Crohn's Disease"|"3"|"0.6"  
"14658"|"Ferrous Sulfate 325 (65 Fe) MG Oral Tablet"|"66444"|"Pregnancy Complicated By Anemia"|"10"|"0.769231"  
"14658"|"Ferrous Sulfate 325 (65 Fe) MG Oral Tablet"|"77962"|"Anemia"|"59"|"0.556604"  
"14658"|"Ferrous Sulfate 325 (65 Fe) MG Oral Tablet"|"77968"|"Iron Deficiency"|"13"|"0.541667"  
"14658"|"Ferrous Sulfate 325 (65 Fe) MG Oral Tablet"|"77969"|"Iron Deficiency Anemia Secondary To Chronic Blood Loss"|"5"|"0.714286"  
"14658"|"Ferrous Sulfate 325 (65 Fe) MG Oral Tablet"|"259525"|"Anemia Secondary To Blood Loss"|"2"|"0.666667"  
"14658"|"Ferrous Sulfate 325 (65 Fe) MG Oral Tablet"|"274672"|"Chronic Kidney Disease, Stage 4"|"2"|"0.333333"  
"14660"|"Ferrous Sulfate 325 (65 Fe) MG Oral Tablet Delayed Release"|"77962"|"Anemia"|"2"|"0.285714"  
"14686"|"Cortef 10 MG Oral Tablet"|"69214"|"Hypopituitarism"|"3"|"0.6"  
"14686"|"Cortef 10 MG Oral Tablet"|"69464"|"Congenital Adrenal Hyperplasia"|"2"|"1"  
"14721"|"Flagyl 500 MG Oral Tablet"|"66213"|"Vaginitis"|"8"|"0.571429"  
"14721"|"Flagyl 500 MG Oral Tablet"|"66217"|"Trichomonas Vaginalis Vaginitis"|"4"|"1"  
"14721"|"Flagyl 500 MG Oral Tablet"|"66254"|"Trichomonas Vulvovaginitis"|"22"|"0.814815"  
"14721"|"Flagyl 500 MG Oral Tablet"|"288790"|"Bacterial Vaginosis"|"119"|"0.881481"  
"14750"|"Fluocinonide 0.05 % External Cream"|"69710"|"Contact Dermatitis"|"2"|"0.4"  
"14750"|"Fluocinonide 0.05 % External Cream"|"69901"|"Psoriasis"|"3"|"0.75"  
"14750"|"Fluocinonide 0.05 % External Cream"|"70112"|"Atopic Dermatitis"|"5"|"0.625"  
"14750"|"Fluocinonide 0.05 % External Cream"|"88375"|"Skin: A Rash"|"5"|"1"  
"14750"|"Fluocinonide 0.05 % External Cream"|"93705"|"Dermatitis"|"5"|"0.714286"  
"14750"|"Fluocinonide 0.05 % External Cream"|"278350"|"Eczema"|"8"|"0.727273"  
"14750"|"Fluocinonide 0.05 % External Cream"|"298801"|"Dyshidrotic Eczema"|"3"|"1"  
"14771"|"Cyanocobalamin 1000 MCG/ML Injection Solution"|"77962"|"Anemia"|"6"|"0.272727"  
"14771"|"Cyanocobalamin 1000 MCG/ML Injection Solution"|"77976"|"Pernicious Anemia"|"5"|"0.5"  
"14771"|"Cyanocobalamin 1000 MCG/ML Injection Solution"|"252681"|"Fatigue"|"5"|"0.25"  
"14771"|"Cyanocobalamin 1000 MCG/ML Injection Solution"|"257948"|"Vitamin B12 Deficiency"|"28"|"0.7"  
"14771"|"Cyanocobalamin 1000 MCG/ML Injection Solution"|"259485"|"Selective B12 Malabsorption"|"5"|"0.833333"  
"14793"|"Cytomel 5 MCG Oral Tablet"|"69258"|"Hypothyroidism"|"10"|"0.4"  
"14825"|"Dapsone 25 MG Oral Tablet"|"70550"|"Relapsing Polychondritis"|"2"|"0.666667"  
"14825"|"Dapsone 25 MG Oral Tablet"|"83136"|"Bite From A Venomous Spider"|"2"|"0.666667"  
"14852"|"FluPHENAZine Decanoate 25 MG/ML Injection Solution"|"76213"|"Schizophrenia"|"4"|"0.8"  
"14852"|"FluPHENAZine Decanoate 25 MG/ML Injection Solution"|"76232"|"Paranoid Schizophrenia"|"2"|"0.666667"  
"14852"|"FluPHENAZine Decanoate 25 MG/ML Injection Solution"|"76238"|"Paranoid Schizophrenia, Stable"|"2"|"1"  
"14852"|"FluPHENAZine Decanoate 25 MG/ML Injection Solution"|"76272"|"Schizoaffective Disorder"|"2"|"1"  
"14858"|"Folic Acid 1 MG Oral Tablet"|"31788"|"Multiple Gestation - Twins"|"3"|"0.75"  
"14858"|"Folic Acid 1 MG Oral Tablet"|"64980"|"Crohn's Disease"|"3"|"0.272727"  
"14858"|"Folic Acid 1 MG Oral Tablet"|"65041"|"Ulcerative Colitis"|"4"|"0.666667"  
"14858"|"Folic Acid 1 MG Oral Tablet"|"65103"|"Proctitis"|"2"|"1"  
"14858"|"Folic Acid 1 MG Oral Tablet"|"67760"|"Connective Tissue Defect"|"2"|"1"  
"14858"|"Folic Acid 1 MG Oral Tablet"|"69731"|"Chronic Lupus Erythematosus"|"2"|"0.5"  
"14858"|"Folic Acid 1 MG Oral Tablet"|"69824"|"Morphea (Localized Scleroderma)"|"4"|"0.666667"  
"14858"|"Folic Acid 1 MG Oral Tablet"|"70141"|"Acrodermatitis Chronica Atrophicans"|"2"|"1"  
"14858"|"Folic Acid 1 MG Oral Tablet"|"70455"|"Rheumatoid Arthritis"|"286"|"0.858859"  
"14858"|"Folic Acid 1 MG Oral Tablet"|"70461"|"Juvenile Rheumatoid Arthritis"|"3"|"0.75"  
"14858"|"Folic Acid 1 MG Oral Tablet"|"70472"|"Systemic Lupus Erythematosus"|"14"|"0.388889"  
"14858"|"Folic Acid 1 MG Oral Tablet"|"70474"|"Mixed Connective Tissue Disease"|"2"|"0.4"  
"14858"|"Folic Acid 1 MG Oral Tablet"|"70475"|"Scleroderma"|"26"|"0.530612"  
"14858"|"Folic Acid 1 MG Oral Tablet"|"70479"|"Sicca Syndrome"|"2"|"0.333333"

"14858"|"Folic Acid 1 MG Oral Tablet"|"70500"|"Polymyalgia Rheumatica"|"7"|"0.5"  
"14858"|"Folic Acid 1 MG Oral Tablet"|"70550"|"Relapsing Polychondritis"|"2"|"1"  
"14858"|"Folic Acid 1 MG Oral Tablet"|"70598"|"Polymyositis / Dermatomyositis:"|"11"|"0.846154"  
"14858"|"Folic Acid 1 MG Oral Tablet"|"70599"|"Typical Polymyositis (Type I)"|"2"|"0.666667"  
"14858"|"Folic Acid 1 MG Oral Tablet"|"70600"|"Typical Dermatomyositis (Type II)"|"4"|"0.8"  
"14858"|"Folic Acid 1 MG Oral Tablet"|"70604"|"Polymyositis In Other Collagen Vascular Disease"|"2"|"0.666667"  
"14858"|"Folic Acid 1 MG Oral Tablet"|"70607"|"Polymyositis In Scleroderma"|"3"|"0.6"  
"14858"|"Folic Acid 1 MG Oral Tablet"|"70620"|"Sarcoidosis"|"3"|"0.272727"  
"14858"|"Folic Acid 1 MG Oral Tablet"|"70640"|"Wegener's Granulomatosis"|"2"|"0.285714"  
"14858"|"Folic Acid 1 MG Oral Tablet"|"70704"|"Symmetric Polyarticular Inflammation"|"22"|"0.709677"  
"14858"|"Folic Acid 1 MG Oral Tablet"|"70706"|"Ankylosing Spondylitis"|"5"|"0.714286"  
"14858"|"Folic Acid 1 MG Oral Tablet"|"70719"|"Psoriatic Arthropathy"|"28"|"0.848485"  
"14858"|"Folic Acid 1 MG Oral Tablet"|"70722"|"Spondylitis"|"2"|"0.666667"  
"14858"|"Folic Acid 1 MG Oral Tablet"|"75001"|"Partial Complex Psychomotor Seizure"|"2"|"1"  
"14858"|"Folic Acid 1 MG Oral Tablet"|"75002"|"Partial Complex Psychomotor Seizure With Intractable Seizure"|"3"|"0.3"  
"14858"|"Folic Acid 1 MG Oral Tablet"|"75812"|"Myalgia And Myositis"|"2"|"0.333333"  
"14858"|"Folic Acid 1 MG Oral Tablet"|"75960"|"Alcohol Abuse - In Remission"|"2"|"1"  
"14858"|"Folic Acid 1 MG Oral Tablet"|"75964"|"Alcoholism"|"2"|"0.4"  
"14858"|"Folic Acid 1 MG Oral Tablet"|"78000"|"Hereditary Hemolytic Spherocytosis"|"5"|"0.714286"  
"14858"|"Folic Acid 1 MG Oral Tablet"|"78008"|"Sickle Cell Hb-SC Disease"|"7"|"0.538462"  
"14858"|"Folic Acid 1 MG Oral Tablet"|"78011"|"Sickle Cell Anemia"|"8"|"0.32"  
"14858"|"Folic Acid 1 MG Oral Tablet"|"78035"|"Sickle Cell Hb-SS Disease"|"40"|"0.833333"  
"14858"|"Folic Acid 1 MG Oral Tablet"|"257896"|"Homocysteinemia"|"5"|"0.454545"  
"14858"|"Folic Acid 1 MG Oral Tablet"|"257912"|"Disorder Of Mitochondrial Metabolism"|"26"|"0.8125"  
"14858"|"Folic Acid 1 MG Oral Tablet"|"257950"|"Folic Acid Deficiency"|"3"|"0.6"  
"14858"|"Folic Acid 1 MG Oral Tablet"|"257996"|"Arthritis"|"6"|"0.12"  
"14858"|"Folic Acid 1 MG Oral Tablet"|"274406"|"Pregnancy Test Positive"|"3"|"0.75"  
"14858"|"Folic Acid 1 MG Oral Tablet"|"278781"|"Lung Cancer"|"2"|"0.285714"  
"14858"|"Folic Acid 1 MG Oral Tablet"|"289878"|"Generalized Convulsive Myoclonic Seizure, Juvenile"|"2"|"0.4"  
"14858"|"Folic Acid 1 MG Oral Tablet"|"296649"|"Diffuse Connective Tissue Disorder"|"4"|"0.8"  
"14858"|"Folic Acid 1 MG Oral Tablet"|"297231"|"Epilepsy"|"2"|"0.222222"  
"14859"|"Folic Acid 400 MCG Oral Tablet"|"77962"|"Anemia"|"2"|"0.4"  
"14887"|"Furosemide 20 MG Oral Tablet"|"28146"|"Chronic Renal Failure"|"6"|"0.146341"  
"14887"|"Furosemide 20 MG Oral Tablet"|"60863"|"Difficulty Breathing (Dyspnea)"|"6"|"0.146341"  
"14887"|"Furosemide 20 MG Oral Tablet"|"62975"|"Coronary Artery Disease"|"26"|"0.117117"  
"14887"|"Furosemide 20 MG Oral Tablet"|"63148"|"2-vessel Coronary Artery Stenosis"|"2"|"0.285714"  
"14887"|"Furosemide 20 MG Oral Tablet"|"63173"|"Cardiomyopathy"|"7"|"0.333333"  
"14887"|"Furosemide 20 MG Oral Tablet"|"63217"|"Congestive Heart Failure"|"70"|"0.414201"  
"14887"|"Furosemide 20 MG Oral Tablet"|"63218"|"Right Sided Congestive Heart Failure"|"2"|"0.333333"  
"14887"|"Furosemide 20 MG Oral Tablet"|"63224"|"Congestive Heart Failure With Systolic And Diastolic Dysfunction"|"2"|"0.285714"  
"14887"|"Furosemide 20 MG Oral Tablet"|"63467"|"Hypertension"|"81"|"0.176087"  
"14887"|"Furosemide 20 MG Oral Tablet"|"63468"|"Essential Hypertension"|"47"|"0.238579"  
"14887"|"Furosemide 20 MG Oral Tablet"|"63470"|"Benign Essential Hypertension"|"42"|"0.24"  
"14887"|"Furosemide 20 MG Oral Tablet"|"63471"|"Accelerated Essential Hypertension"|"2"|"0.285714"  
"14887"|"Furosemide 20 MG Oral Tablet"|"63484"|"Pulmonary Hypertension"|"7"|"0.304348"  
"14887"|"Furosemide 20 MG Oral Tablet"|"68084"|"Fluid Overload"|"2"|"0.333333"  
"14887"|"Furosemide 20 MG Oral Tablet"|"70475"|"Scleroderma"|"2"|"0.285714"  
"14887"|"Furosemide 20 MG Oral Tablet"|"155099"|"(Lower) Leg Localized Swelling"|"12"|"0.461538"  
"14887"|"Furosemide 20 MG Oral Tablet"|"155100"|"(Lower) Leg Localized Swelling Bilateral"|"24"|"0.342857"  
"14887"|"Furosemide 20 MG Oral Tablet"|"155101"|"(Lower) Leg Localized Swelling Unilateral"|"4"|"0.4"  
"14887"|"Furosemide 20 MG Oral Tablet"|"155126"|"Leg Localized Swelling Left"|"4"|"0.666667"  
"14887"|"Furosemide 20 MG Oral Tablet"|"155856"|"Ankle Swelling (On Exam)"|"3"|"0.428571"

"14887"|"Furosemide 20 MG Oral Tablet"|"157287"|"Feet Swelling"|"2"|"0.4"  
"14887"|"Furosemide 20 MG Oral Tablet"|"250856"|"Chronic Diastolic Congestive Heart Failure"|"2"|"0.25"  
"14887"|"Furosemide 20 MG Oral Tablet"|"250864"|"Diastolic Congestive Heart Failure"|"2"|"0.2"  
"14887"|"Furosemide 20 MG Oral Tablet"|"250918"|"Chronic Systolic Congestive Heart Failure"|"3"|"0.214286"  
"14887"|"Furosemide 20 MG Oral Tablet"|"274605"|"Chronic Kidney Disease, Stage 2"|"2"|"0.222222"  
"14887"|"Furosemide 20 MG Oral Tablet"|"274711"|"End Stage Renal Disease"|"2"|"0.2"  
"14887"|"Furosemide 20 MG Oral Tablet"|"282327"|"Prehypertension"|"2"|"1"  
"14887"|"Furosemide 20 MG Oral Tablet"|"282680"|"Edema"|"31"|"0.462687"  
"14888"|"Furosemide 40 MG Oral Tablet"|"28146"|"Chronic Renal Failure"|"6"|"0.125"  
"14888"|"Furosemide 40 MG Oral Tablet"|"62975"|"Coronary Artery Disease"|"30"|"0.136364"  
"14888"|"Furosemide 40 MG Oral Tablet"|"63148"|"2-vessel Coronary Artery Stenosis"|"2"|"0.5"  
"14888"|"Furosemide 40 MG Oral Tablet"|"63173"|"Cardiomyopathy"|"12"|"0.342857"  
"14888"|"Furosemide 40 MG Oral Tablet"|"63174"|"Dilated Cardiomyopathy"|"3"|"0.136364"  
"14888"|"Furosemide 40 MG Oral Tablet"|"63217"|"Congestive Heart Failure"|"88"|"0.392857"  
"14888"|"Furosemide 40 MG Oral Tablet"|"63222"|"Left Heart Failure - Class III"|"2"|"0.285714"  
"14888"|"Furosemide 40 MG Oral Tablet"|"63224"|"Congestive Heart Failure With Systolic And Diastolic  
Dysfunction"|"5"|"0.625"  
"14888"|"Furosemide 40 MG Oral Tablet"|"63285"|"Mitral Regurgitation"|"4"|"0.111111"  
"14888"|"Furosemide 40 MG Oral Tablet"|"63467"|"Hypertension"|"88"|"0.178499"  
"14888"|"Furosemide 40 MG Oral Tablet"|"63468"|"Essential Hypertension"|"42"|"0.201923"  
"14888"|"Furosemide 40 MG Oral Tablet"|"63470"|"Benign Essential Hypertension"|"34"|"0.197674"  
"14888"|"Furosemide 40 MG Oral Tablet"|"63484"|"Pulmonary Hypertension"|"4"|"0.133333"  
"14888"|"Furosemide 40 MG Oral Tablet"|"65286"|"Cirrhosis"|"3"|"0.136364"  
"14888"|"Furosemide 40 MG Oral Tablet"|"65287"|"Alcoholic (Laennec's) Cirrhosis"|"2"|"0.222222"  
"14888"|"Furosemide 40 MG Oral Tablet"|"68084"|"Fluid Overload"|"3"|"0.428571"  
"14888"|"Furosemide 40 MG Oral Tablet"|"70475"|"Scleroderma"|"2"|"0.4"  
"14888"|"Furosemide 40 MG Oral Tablet"|"113252"|"Edema (On Exam)"|"3"|"0.111111"  
"14888"|"Furosemide 40 MG Oral Tablet"|"155099"|"Lower Leg Localized Swelling"|"5"|"0.227273"  
"14888"|"Furosemide 40 MG Oral Tablet"|"155100"|"Lower Leg Localized Swelling Bilateral"|"15"|"0.211268"  
"14888"|"Furosemide 40 MG Oral Tablet"|"155101"|"Lower Leg Localized Swelling Unilateral"|"5"|"0.454545"  
"14888"|"Furosemide 40 MG Oral Tablet"|"155856"|"Ankle Swelling (On Exam)"|"4"|"0.363636"  
"14888"|"Furosemide 40 MG Oral Tablet"|"250856"|"Chronic Diastolic Congestive Heart Failure"|"2"|"0.5"  
"14888"|"Furosemide 40 MG Oral Tablet"|"250862"|"Chronic Combined Systolic And Diastolic Congestive Heart  
Failure"|"6"|"0.4"  
"14888"|"Furosemide 40 MG Oral Tablet"|"250869"|"Acute Combined Systolic And Diastolic Congestive Heart  
Failure"|"2"|"0.4"  
"14888"|"Furosemide 40 MG Oral Tablet"|"250884"|"Benign Hypertensive Heart Disease Without Congestive Heart  
Failure"|"2"|"0.2"  
"14888"|"Furosemide 40 MG Oral Tablet"|"250918"|"Chronic Systolic Congestive Heart Failure"|"8"|"0.296296"  
"14888"|"Furosemide 40 MG Oral Tablet"|"274669"|"Chronic Renal Insufficiency"|"5"|"0.104167"  
"14888"|"Furosemide 40 MG Oral Tablet"|"274672"|"Chronic Kidney Disease, Stage 4"|"5"|"0.277778"  
"14888"|"Furosemide 40 MG Oral Tablet"|"282629"|"Diastolic Dysfunction"|"2"|"0.222222"  
"14888"|"Furosemide 40 MG Oral Tablet"|"282680"|"Edema"|"23"|"0.315068"  
"14924"|"Depakote 250 MG Oral Tablet Delayed Release"|"74533"|"Migraine Headache"|"2"|"0.4"  
"14924"|"Depakote 250 MG Oral Tablet Delayed Release"|"74988"|"Seizure Disorder"|"3"|"0.25"  
"14924"|"Depakote 250 MG Oral Tablet Delayed Release"|"76306"|"Episodic Mood Disorders"|"3"|"0.75"  
"14924"|"Depakote 250 MG Oral Tablet Delayed Release"|"251600"|"Dementia"|"2"|"1"  
"14924"|"Depakote 250 MG Oral Tablet Delayed Release"|"297231"|"Epilepsy"|"2"|"0.285714"  
"14925"|"Depakote Sprinkles 125 MG Oral Capsule Sprinkle"|"74988"|"Seizure Disorder"|"4"|"0.333333"  
"14925"|"Depakote Sprinkles 125 MG Oral Capsule Sprinkle"|"75002"|"Partial Complex Psychomotor Seizure With  
Intractable Seizure"|"3"|"0.5"  
"14925"|"Depakote Sprinkles 125 MG Oral Capsule Sprinkle"|"252552"|"Generalized Convulsive Tonic-clonic Seizure  
With Intractable Seizure"|"2"|"1"  
"14925"|"Depakote Sprinkles 125 MG Oral Capsule Sprinkle"|"297231"|"Epilepsy"|"4"|"0.8"

"15005""Dexamethasone 0.5 MG Oral Tablet""63468""Essential Hypertension""2""0.4"  
"15005""Dexamethasone 0.5 MG Oral Tablet""69194""Endocrine Disorder""4""1"  
"15005""Dexamethasone 0.5 MG Oral Tablet""69549""Polycystic Ovarian Syndrome""8""0.571429"  
"15005""Dexamethasone 0.5 MG Oral Tablet""247787""Endocrine Laboratory Tests Nonspecific Abnormal Findings""2""0.666667"  
"15005""Dexamethasone 0.5 MG Oral Tablet""283296""Abnormal Weight Gain""3""0.3"  
"15006""Dexamethasone 1 MG Oral Tablet""247787""Endocrine Laboratory Tests Nonspecific Abnormal Findings""3""0.5"  
"15006""Dexamethasone 1 MG Oral Tablet""283296""Abnormal Weight Gain""3""0.428571"  
"15008""Dexamethasone 2 MG Oral Tablet""62588""Chronic Ethmoidal Sinusitis""2""1"  
"15009""Dexamethasone 4 MG Oral Tablet""80524""Adenocarcinoma Of The Breast""3""0.75"  
"15009""Dexamethasone 4 MG Oral Tablet""80830""Malignant Neoplasm Of The Prostate Gland""3""0.75"  
"15009""Dexamethasone 4 MG Oral Tablet""80831""Adenocarcinoma Of The Prostate Gland""4""0.5"  
"15009""Dexamethasone 4 MG Oral Tablet""80847""Renal Cell Carcinoma""7""0.777778"  
"15009""Dexamethasone 4 MG Oral Tablet""81217""Multiple Myeloma""2""0.5"  
"15009""Dexamethasone 4 MG Oral Tablet""260319""Colon Cancer""3""1"  
"15009""Dexamethasone 4 MG Oral Tablet""260898""Kidney Cancer""3""0.6"  
"15009""Dexamethasone 4 MG Oral Tablet""278808""Breast Cancer""8""0.5"  
"15009""Dexamethasone 4 MG Oral Tablet""278812""Prostate Cancer""34""0.809524"  
"15012""Dexamethasone Sodium Phosphate 4 MG/ML Injection Solution""85614""Joint Pain, Localized In The Hip""2""0.666667"  
"15048""Gentamicin Sulfate 40 MG/ML Injection Solution""62588""Chronic Ethmoidal Sinusitis""7""0.777778"  
"15084""Grifulvin V 500 MG Oral Tablet""70116""Tinea Capitis""5""0.714286"  
"15091""GuaiFENesin 100 MG/5ML Oral Syrup""60869""Cough""10""0.909091"  
"15091""GuaiFENesin 100 MG/5ML Oral Syrup""62760""Acute Pharyngitis""3""0.75"  
"15091""GuaiFENesin 100 MG/5ML Oral Syrup""64118""Acute Bronchitis""2""0.5"  
"15091""GuaiFENesin 100 MG/5ML Oral Syrup""77891""Acute Upper Respiratory Infection""6""0.75"  
"15106""Haldol Decanoate 100 MG/ML Intramuscular Solution""76237""Paranoid Schizophrenia In Remission""2""1"  
"15111""Haloperidol 0.5 MG Oral Tablet""251600""Dementia""3""0.3"  
"15111""Haloperidol 0.5 MG Oral Tablet""289876""Alzheimer's Disease With Behavioral Disturbance""2""1"  
"15141""Diazepam 1 MG/ML Oral Solution""201177""Quadriplegic Cerebral Palsy With Spasticity""7""0.538462"  
"15142""Diazepam 10 MG Oral Tablet""61108""Insomnia""3""0.375"  
"15142""Diazepam 10 MG Oral Tablet""61118""Anxiety (Symptom)""8""0.571429"  
"15142""Diazepam 10 MG Oral Tablet""66143""Metrorrhagia""2""1"  
"15142""Diazepam 10 MG Oral Tablet""76536""Generalized Anxiety Disorder""3""0.75"  
"15142""Diazepam 10 MG Oral Tablet""76537""Panic Disorder Without Agoraphobia""2""1"  
"15142""Diazepam 10 MG Oral Tablet""80664""Leiomyoma Of The Uterus""3""0.5"  
"15143""Diazepam 2 MG Oral Tablet""61108""Insomnia""4""0.4"  
"15143""Diazepam 2 MG Oral Tablet""61118""Anxiety (Symptom)""7""0.636364"  
"15143""Diazepam 2 MG Oral Tablet""74988""Seizure Disorder""4""0.307692"  
"15143""Diazepam 2 MG Oral Tablet""75090""Cerebral Palsy""3""0.375"  
"15143""Diazepam 2 MG Oral Tablet""275604""Depression With Anxiety""2""0.666667"  
"15143""Diazepam 2 MG Oral Tablet""288824""Convulsive Disorder""2""1"  
"15144""Diazepam 5 MG Oral Tablet""61103""Sleep Disturbances""2""1"  
"15144""Diazepam 5 MG Oral Tablet""61108""Insomnia""5""0.357143"  
"15144""Diazepam 5 MG Oral Tablet""61118""Anxiety (Symptom)""9""0.428571"  
"15144""Diazepam 5 MG Oral Tablet""63912""Varicose Veins With Inflammation""10""0.357143"  
"15144""Diazepam 5 MG Oral Tablet""73666""Backache""3""0.230769"  
"15144""Diazepam 5 MG Oral Tablet""75002""Partial Complex Psychomotor Seizure With Intractable Seizure""3""0.75"  
"15144""Diazepam 5 MG Oral Tablet""75116""Stiff Man' Syndrome""2""1"  
"15144""Diazepam 5 MG Oral Tablet""75125""Multiple Sclerosis""4""0.285714"  
"15144""Diazepam 5 MG Oral Tablet""76357""Major Depression, Recurrent""3""0.75"

"15144""Diazepam 5 MG Oral Tablet""76536""Generalized Anxiety Disorder""5""0.5"  
"15144""Diazepam 5 MG Oral Tablet""76537""Panic Disorder Without Agoraphobia""2""0.4"  
"15144""Diazepam 5 MG Oral Tablet""76538""Panic Disorder With Agoraphobia""2""0.5"  
"15144""Diazepam 5 MG Oral Tablet""76587""Anxiety Disorder NOS""5""0.555556"  
"15144""Diazepam 5 MG Oral Tablet""250903""Varicose Veins With Pain""11""0.333333"  
"15144""Diazepam 5 MG Oral Tablet""252552""Generalized Convulsive Tonic-clonic Seizure With Intractable Seizure""2""0.666667"  
"15144""Diazepam 5 MG Oral Tablet""275592""Post-traumatic Stress Disorder""3""0.6"  
"15144""Diazepam 5 MG Oral Tablet""282672""Venous Insufficiency""7""0.388889"  
"15144""Diazepam 5 MG Oral Tablet""288824""Convulsive Disorder""2""0.5"  
"15151""Dicyclomine HCl 10 MG Oral Capsule""60899""Abdominal Pain""17""0.548387"  
"15151""Dicyclomine HCl 10 MG Oral Capsule""64579""Gastroenteritis""4""0.363636"  
"15151""Dicyclomine HCl 10 MG Oral Capsule""64610""Viral Gastroenteritis""5""1"  
"15151""Dicyclomine HCl 10 MG Oral Capsule""65076""Irritable Bowel Syndrome""7""0.583333"  
"15151""Dicyclomine HCl 10 MG Oral Capsule""65159""Cholelithiasis""2""0.666667"  
"15151""Dicyclomine HCl 10 MG Oral Capsule""87743""Diffuse Abdominal Pain""2""1"  
"15152""Dicyclomine HCl 20 MG Oral Tablet""60899""Abdominal Pain""23""0.741935"  
"15152""Dicyclomine HCl 20 MG Oral Tablet""60902""Diarrhea (Symptom)""3""0.272727"  
"15152""Dicyclomine HCl 20 MG Oral Tablet""64762""Dyspepsia""2""0.4"  
"15152""Dicyclomine HCl 20 MG Oral Tablet""65076""Irritable Bowel Syndrome""5""0.5"  
"15152""Dicyclomine HCl 20 MG Oral Tablet""87737""Abdominal Pain In The Right Upper Belly (RUQ)""6""0.857143"  
"15152""Dicyclomine HCl 20 MG Oral Tablet""87824""Bowel Movement Frequency Recent Change""2""1"  
"15152""Dicyclomine HCl 20 MG Oral Tablet""116197""Abdomen Tenderness Direct RUQ""2""0.5"  
"15152""Dicyclomine HCl 20 MG Oral Tablet""258733""Bloating (Symptom)""2""1"  
"15161""Digoxin 0.125 MG Oral Tablet""62916""Atrial Fibrillation""37""0.352381"  
"15161""Digoxin 0.125 MG Oral Tablet""62917""Paroxysmal Atrial Fibrillation""2""0.2"  
"15161""Digoxin 0.125 MG Oral Tablet""62975""Coronary Artery Disease""23""0.283951"  
"15161""Digoxin 0.125 MG Oral Tablet""63173""Cardiomyopathy""6""0.4"  
"15161""Digoxin 0.125 MG Oral Tablet""63174""Dilated Cardiomyopathy""5""0.333333"  
"15161""Digoxin 0.125 MG Oral Tablet""63217""Congestive Heart Failure""20""0.25974"  
"15161""Digoxin 0.125 MG Oral Tablet""63218""Right Sided Congestive Heart Failure""2""1"  
"15161""Digoxin 0.125 MG Oral Tablet""63224""Congestive Heart Failure With Systolic And Diastolic Dysfunction""2""0.333333"  
"15161""Digoxin 0.125 MG Oral Tablet""250862""Chronic Combined Systolic And Diastolic Congestive Heart Failure""2""0.4"  
"15162""Digoxin 0.25 MG Oral Tablet""62914""Atrial Flutter""2""0.5"  
"15162""Digoxin 0.25 MG Oral Tablet""62916""Atrial Fibrillation""18""0.4"  
"15162""Digoxin 0.25 MG Oral Tablet""62975""Coronary Artery Disease""3""0.130435"  
"15162""Digoxin 0.25 MG Oral Tablet""63217""Congestive Heart Failure""7""0.28"  
"15213""HydrALAZINE HCl 100 MG Oral Tablet""63217""Congestive Heart Failure""4""0.210526"  
"15213""HydrALAZINE HCl 100 MG Oral Tablet""63467""Hypertension""22""0.423077"  
"15213""HydrALAZINE HCl 100 MG Oral Tablet""63468""Essential Hypertension""6""0.375"  
"15213""HydrALAZINE HCl 100 MG Oral Tablet""63470""Benign Essential Hypertension""5""0.238095"  
"15214""HydrALAZINE HCl 25 MG Oral Tablet""63217""Congestive Heart Failure""14""0.269231"  
"15214""HydrALAZINE HCl 25 MG Oral Tablet""63467""Hypertension""54""0.362416"  
"15214""HydrALAZINE HCl 25 MG Oral Tablet""63468""Essential Hypertension""27""0.402985"  
"15214""HydrALAZINE HCl 25 MG Oral Tablet""63470""Benign Essential Hypertension""19""0.38"  
"15215""HydrALAZINE HCl 50 MG Oral Tablet""63173""Cardiomyopathy""2""0.285714"  
"15215""HydrALAZINE HCl 50 MG Oral Tablet""63217""Congestive Heart Failure""5""0.151515"  
"15215""HydrALAZINE HCl 50 MG Oral Tablet""63467""Hypertension""46""0.410714"  
"15215""HydrALAZINE HCl 50 MG Oral Tablet""63468""Essential Hypertension""19""0.452381"  
"15215""HydrALAZINE HCl 50 MG Oral Tablet""63470""Benign Essential Hypertension""13""0.325"  
"15226""Hydrocortisone 0.5 % External Cream""69710""Contact Dermatitis""4""0.571429"

"15226"|"Hydrocortisone 0.5 % External Cream"|"70112"|"Atopic Dermatitis"|"3"|"0.333333"  
"15226"|"Hydrocortisone 0.5 % External Cream"|"70135"|"Seborrheic Dermatitis"|"4"|"0.8"  
"15226"|"Hydrocortisone 0.5 % External Cream"|"93705"|"Dermatitis"|"2"|"0.5"  
"15226"|"Hydrocortisone 0.5 % External Cream"|"278350"|"Eczema"|"4"|"0.222222"  
"15227"|"Hydrocortisone 0.5 % External Ointment"|"70112"|"Atopic Dermatitis"|"2"|"0.25"  
"15227"|"Hydrocortisone 0.5 % External Ointment"|"88375"|"Skin: A Rash"|"2"|"0.5"  
"15227"|"Hydrocortisone 0.5 % External Ointment"|"278350"|"Eczema"|"3"|"0.2"  
"15228"|"Hydrocortisone 20 MG Oral Tablet"|"69214"|"Hypopituitarism"|"5"|"1"  
"15228"|"Hydrocortisone 20 MG Oral Tablet"|"291853"|"Adrenal Insufficiency"|"2"|"0.5"  
"15230"|"Hydrocortisone Acetate 25 MG Rectal Suppository"|"60918"|"Rectal Pain"|"2"|"0.666667"  
"15230"|"Hydrocortisone Acetate 25 MG Rectal Suppository"|"65128"|"Hemorrhoids"|"18"|"0.486486"  
"15230"|"Hydrocortisone Acetate 25 MG Rectal Suppository"|"65134"|"Internal Hemorrhoids"|"6"|"1"  
"15230"|"Hydrocortisone Acetate 25 MG Rectal Suppository"|"65137"|"Internal Hemorrhoids With Bleeding"|"2"|"1"  
"15230"|"Hydrocortisone Acetate 25 MG Rectal Suppository"|"65141"|"External Hemorrhoids"|"4"|"0.8"  
"15230"|"Hydrocortisone Acetate 25 MG Rectal Suppository"|"65144"|"External Hemorrhoids With Bleeding"|"6"|"0.857143"  
"15230"|"Hydrocortisone Acetate 25 MG Rectal Suppository"|"65150"|"Anal Fissure"|"2"|"0.222222"  
"15230"|"Hydrocortisone Acetate 25 MG Rectal Suppository"|"87834"|"Red Blood In Bowel Movement (Hematochezia)"|"5"|"0.416667"  
"15230"|"Hydrocortisone Acetate 25 MG Rectal Suppository"|"166777"|"Constipation"|"3"|"0.2"  
"15234"|"Hydromet 5-1.5 MG/5ML Oral Syrup"|"60869"|"Cough"|"6"|"0.75"  
"15236"|"HYDRomorphone HCl 2 MG Oral Tablet"|"31947"|"Lumbago"|"2"|"1"  
"15236"|"HYDRomorphone HCl 2 MG Oral Tablet"|"79148"|"Malignant Pancreatic Neoplasm"|"2"|"1"  
"15236"|"HYDRomorphone HCl 2 MG Oral Tablet"|"288921"|"Chronic Pain"|"2"|"0.666667"  
"15242"|"HydrOXYzine HCl 10 MG/5ML Oral Syrup"|"61029"|"Itching (Pruritus)"|"2"|"0.666667"  
"15242"|"HydrOXYzine HCl 10 MG/5ML Oral Syrup"|"69710"|"Contact Dermatitis"|"3"|"0.15"  
"15242"|"HydrOXYzine HCl 10 MG/5ML Oral Syrup"|"69885"|"Pityriasis Rosea"|"3"|"0.75"  
"15242"|"HydrOXYzine HCl 10 MG/5ML Oral Syrup"|"70112"|"Atopic Dermatitis"|"23"|"0.511111"  
"15242"|"HydrOXYzine HCl 10 MG/5ML Oral Syrup"|"77704"|"Scabies"|"5"|"0.416667"  
"15242"|"HydrOXYzine HCl 10 MG/5ML Oral Syrup"|"81335"|"Multiple Nonvenomous Insect Bites"|"4"|"0.571429"  
"15242"|"HydrOXYzine HCl 10 MG/5ML Oral Syrup"|"93705"|"Dermatitis"|"2"|"0.2"  
"15242"|"HydrOXYzine HCl 10 MG/5ML Oral Syrup"|"278350"|"Eczema"|"32"|"0.5"  
"15243"|"HydrOXYzine HCl 10 MG Oral Tablet"|"61029"|"Itching (Pruritus)"|"6"|"0.4"  
"15243"|"HydrOXYzine HCl 10 MG Oral Tablet"|"69710"|"Contact Dermatitis"|"3"|"0.5"  
"15243"|"HydrOXYzine HCl 10 MG Oral Tablet"|"69942"|"Allergic Urticaria"|"3"|"0.75"  
"15243"|"HydrOXYzine HCl 10 MG Oral Tablet"|"77704"|"Scabies"|"3"|"0.75"  
"15243"|"HydrOXYzine HCl 10 MG Oral Tablet"|"88375"|"Skin: A Rash"|"3"|"0.333333"  
"15243"|"HydrOXYzine HCl 10 MG Oral Tablet"|"93705"|"Dermatitis"|"5"|"0.5"  
"15243"|"HydrOXYzine HCl 10 MG Oral Tablet"|"278350"|"Eczema"|"5"|"0.555556"  
"15244"|"HydrOXYzine HCl 25 MG Oral Tablet"|"61029"|"Itching (Pruritus)"|"18"|"0.782609"  
"15244"|"HydrOXYzine HCl 25 MG Oral Tablet"|"69710"|"Contact Dermatitis"|"7"|"0.636364"  
"15244"|"HydrOXYzine HCl 25 MG Oral Tablet"|"69901"|"Psoriasis"|"2"|"0.5"  
"15244"|"HydrOXYzine HCl 25 MG Oral Tablet"|"69941"|"Urticaria"|"6"|"0.6"  
"15244"|"HydrOXYzine HCl 25 MG Oral Tablet"|"69942"|"Allergic Urticaria"|"4"|"0.571429"  
"15244"|"HydrOXYzine HCl 25 MG Oral Tablet"|"69948"|"Idiopathic Urticaria"|"3"|"1"  
"15244"|"HydrOXYzine HCl 25 MG Oral Tablet"|"70112"|"Atopic Dermatitis"|"3"|"0.5"  
"15244"|"HydrOXYzine HCl 25 MG Oral Tablet"|"70475"|"Scleroderma"|"3"|"0.75"  
"15244"|"HydrOXYzine HCl 25 MG Oral Tablet"|"76232"|"Paranoid Schizophrenia"|"3"|"0.75"  
"15244"|"HydrOXYzine HCl 25 MG Oral Tablet"|"76357"|"Major Depression, Recurrent"|"4"|"0.666667"  
"15244"|"HydrOXYzine HCl 25 MG Oral Tablet"|"76431"|"Borderline Personality Disorder"|"2"|"0.333333"  
"15244"|"HydrOXYzine HCl 25 MG Oral Tablet"|"76587"|"Anxiety Disorder NOS"|"7"|"0.538462"  
"15244"|"HydrOXYzine HCl 25 MG Oral Tablet"|"77704"|"Scabies"|"2"|"0.666667"  
"15244"|"HydrOXYzine HCl 25 MG Oral Tablet"|"88375"|"Skin: A Rash"|"3"|"0.3"  
"15244"|"HydrOXYzine HCl 25 MG Oral Tablet"|"93705"|"Dermatitis"|"4"|"0.285714"

"15244"|"HydrOXYzine HCl 25 MG Oral Tablet"|"258010"|"Allergic Reaction"|"4"|"0.4"  
"15244"|"HydrOXYzine HCl 25 MG Oral Tablet"|"278317"|"Dermatitis Due To Contact With Poison Ivy"|"3"|"0.5"  
"15244"|"HydrOXYzine HCl 25 MG Oral Tablet"|"278350"|"Eczema"|"9"|"0.473684"  
"15248"|"Hyoscyamine Sulfate 0.125 MG/5ML Oral Elixir"|"60899"|"Abdominal Pain"|"2"|"1"  
"15250"|"Hyoscyamine Sulfate 0.125 MG Oral Tablet"|"60899"|"Abdominal Pain"|"11"|"0.578947"  
"15250"|"Hyoscyamine Sulfate 0.125 MG Oral Tablet"|"65076"|"Irritable Bowel Syndrome"|"6"|"0.75"  
"15256"|"Dilantin 30 MG Oral Capsule"|"75002"|"Partial Complex Psychomotor Seizure With Intractable Seizure"|"3"|"1"  
"15257"|"Dilantin Infatabs 50 MG Oral Tablet Chewable"|"74988"|"Seizure Disorder"|"2"|"0.5"  
"15268"|"Diltiazem HCl 120 MG Oral Tablet"|"63467"|"Hypertension"|"8"|"0.347826"  
"15269"|"Diltiazem HCl 90 MG Oral Tablet"|"63467"|"Hypertension"|"2"|"0.333333"  
"15285"|"DiphenhydrAMINE HCl 12.5 MG/5ML Oral Elixir"|"64565"|"Upper Respiratory Tract Disorders"|"4"|"0.444444"  
"15285"|"DiphenhydrAMINE HCl 12.5 MG/5ML Oral Elixir"|"70112"|"Atopic Dermatitis"|"4"|"0.235294"  
"15285"|"DiphenhydrAMINE HCl 12.5 MG/5ML Oral Elixir"|"77704"|"Scabies"|"2"|"0.4"  
"15285"|"DiphenhydrAMINE HCl 12.5 MG/5ML Oral Elixir"|"81335"|"Multiple Nonvenomous Insect Bites"|"2"|"0.4"  
"15285"|"DiphenhydrAMINE HCl 12.5 MG/5ML Oral Elixir"|"258010"|"Allergic Reaction"|"2"|"1"  
"15285"|"DiphenhydrAMINE HCl 12.5 MG/5ML Oral Elixir"|"278350"|"Eczema"|"3"|"0.166667"  
"15324"|"Imitrex STATdose System 6 MG/0.5ML Subcutaneous Kit"|"74534"|"Classic Migraine (With Aura)"|"2"|"1"  
"15328"|"Indapamide 2.5 MG Oral Tablet"|"63467"|"Hypertension"|"5"|"0.5"  
"15328"|"Indapamide 2.5 MG Oral Tablet"|"63470"|"Benign Essential Hypertension"|"2"|"0.285714"  
"15337"|"Indomethacin 25 MG Oral Capsule"|"70384"|"Gout"|"13"|"0.565217"  
"15337"|"Indomethacin 25 MG Oral Capsule"|"70386"|"Acute Gout"|"2"|"0.4"  
"15337"|"Indomethacin 25 MG Oral Capsule"|"70387"|"Chronic Gout"|"2"|"0.666667"  
"15337"|"Indomethacin 25 MG Oral Capsule"|"70722"|"Spondylitis"|"2"|"1"  
"15337"|"Indomethacin 25 MG Oral Capsule"|"85673"|"Joint Pain, Localized In The Wrist"|"2"|"0.666667"  
"15337"|"Indomethacin 25 MG Oral Capsule"|"278685"|"Arthralgias In Multiple Sites"|"2"|"1"  
"15356"|"Docusate Sodium 100 MG Oral Capsule"|"60899"|"Abdominal Pain"|"3"|"0.176471"  
"15356"|"Docusate Sodium 100 MG Oral Capsule"|"65055"|"Chronic Constipation"|"12"|"0.631579"  
"15356"|"Docusate Sodium 100 MG Oral Capsule"|"65128"|"Hemorrhoids"|"4"|"0.25"  
"15356"|"Docusate Sodium 100 MG Oral Capsule"|"65141"|"External Hemorrhoids"|"2"|"0.666667"  
"15356"|"Docusate Sodium 100 MG Oral Capsule"|"65142"|"Thrombosed External Hemorrhoids"|"2"|"1"  
"15356"|"Docusate Sodium 100 MG Oral Capsule"|"74585"|"Cerebrospinal Fluid Rhinorrhea"|"4"|"1"  
"15356"|"Docusate Sodium 100 MG Oral Capsule"|"75125"|"Multiple Sclerosis"|"2"|"0.222222"  
"15356"|"Docusate Sodium 100 MG Oral Capsule"|"87834"|"Red Blood In Bowel Movement (Hematochezia)"|"4"|"0.444444"  
"15356"|"Docusate Sodium 100 MG Oral Capsule"|"166777"|"Constipation"|"100"|"0.793651"  
"15356"|"Docusate Sodium 100 MG Oral Capsule"|"251467"|"Limb Pain"|"5"|"0.263158"  
"15378"|"Doral 15 MG Oral Tablet"|"75125"|"Multiple Sclerosis"|"3"|"0.75"  
"15382"|"Doxepin HCl 10 MG Oral Capsule"|"61029"|"Itching (Pruritus)"|"2"|"1"  
"15383"|"Doxepin HCl 100 MG Oral Capsule"|"76351"|"Depression"|"3"|"0.6"  
"15384"|"Doxepin HCl 150 MG Oral Capsule"|"76351"|"Depression"|"2"|"0.666667"  
"15385"|"Doxepin HCl 25 MG Oral Capsule"|"76351"|"Depression"|"2"|"0.666667"  
"15389"|"Doxycycline Hyclate 100 MG Oral Tablet"|"65762"|"Urinary Tract Infection"|"2"|"0.25"  
"15389"|"Doxycycline Hyclate 100 MG Oral Tablet"|"66182"|"Cervicitis Chlamydia Trachomatis"|"2"|"1"  
"15389"|"Doxycycline Hyclate 100 MG Oral Tablet"|"66274"|"Female Infertility"|"3"|"0.6"  
"15389"|"Doxycycline Hyclate 100 MG Oral Tablet"|"69549"|"Polycystic Ovarian Syndrome"|"2"|"0.4"  
"15389"|"Doxycycline Hyclate 100 MG Oral Tablet"|"69606"|"Acne"|"5"|"0.454545"  
"15389"|"Doxycycline Hyclate 100 MG Oral Tablet"|"69785"|"Hidradenitis Suppurativa"|"2"|"0.4"  
"15389"|"Doxycycline Hyclate 100 MG Oral Tablet"|"69999"|"Cellulitis"|"4"|"0.666667"  
"15389"|"Doxycycline Hyclate 100 MG Oral Tablet"|"77872"|"Pelvic Inflammatory Disease"|"7"|"0.875"  
"15389"|"Doxycycline Hyclate 100 MG Oral Tablet"|"77898"|"Chlamydial Disease"|"2"|"0.666667"  
"15389"|"Doxycycline Hyclate 100 MG Oral Tablet"|"80664"|"Leiomyoma Of The Uterus"|"2"|"1"  
"15389"|"Doxycycline Hyclate 100 MG Oral Tablet"|"93705"|"Dermatitis"|"2"|"0.5"

"15432"|"Isometheptene-APAP-Dichloral 65-325-100 MG Oral Capsule"|"60828"|"Headache"|"19"|"0.527778"  
"15432"|"Isometheptene-APAP-Dichloral 65-325-100 MG Oral Capsule"|"74530"|"Tension-type  
Headache"|"6"|"0.428571"  
"15432"|"Isometheptene-APAP-Dichloral 65-325-100 MG Oral Capsule"|"74531"|"Episodic Tension-type  
Headache"|"2"|"0.666667"  
"15432"|"Isometheptene-APAP-Dichloral 65-325-100 MG Oral Capsule"|"74533"|"Migraine Headache"|"11"|"0.55"  
"15432"|"Isometheptene-APAP-Dichloral 65-325-100 MG Oral Capsule"|"74537"|"Common Migraine (Without  
Aura)"|"2"|"0.5"  
"15437"|"Isoniazid 300 MG Oral Tablet"|"77275"|"Tuberculosis"|"3"|"0.333333"  
"15437"|"Isoniazid 300 MG Oral Tablet"|"77403"|"Latent Tuberculosis"|"27"|"0.75"  
"15437"|"Isoniazid 300 MG Oral Tablet"|"94415"|"Exposed To Tuberculosis"|"2"|"0.4"  
"15437"|"Isoniazid 300 MG Oral Tablet"|"199485"|"Tuberculin PPD Nonspec Reaction Without Active  
Tuberculosis"|"3"|"0.75"  
"15437"|"Isoniazid 300 MG Oral Tablet"|"200624"|"Tuberculin PPD Induration Positive Interpretation"|"18"|"0.72"  
"15546"|"Dulcolax 5 MG Oral Tablet Delayed Release"|"166777"|"Constipation"|"2"|"0.666667"  
"15572"|"Ketostix In Vitro Strip"|"69387"|"Type I Diabetes Mellitus"|"2"|"1"  
"15581"|"Klor-Con 10 10 MEQ Oral Tablet Extended Release"|"63217"|"Congestive Heart Failure"|"6"|"0.1875"  
"15581"|"Klor-Con 10 10 MEQ Oral Tablet Extended Release"|"63467"|"Hypertension"|"10"|"0.131579"  
"15581"|"Klor-Con 10 10 MEQ Oral Tablet Extended Release"|"63468"|"Essential Hypertension"|"5"|"0.135135"  
"15581"|"Klor-Con 10 10 MEQ Oral Tablet Extended Release"|"63470"|"Benign Essential  
Hypertension"|"6"|"0.181818"  
"15581"|"Klor-Con 10 10 MEQ Oral Tablet Extended Release"|"68089"|"Hypokalemia"|"7"|"0.875"  
"15582"|"Klor-Con 8 MEQ Oral Tablet Extended Release"|"62975"|"Coronary Artery Disease"|"2"|"0.285714"  
"15582"|"Klor-Con 8 MEQ Oral Tablet Extended Release"|"63468"|"Essential Hypertension"|"3"|"0.5"  
"15655"|"Leucovorin Calcium 25 MG Oral Tablet"|"257912"|"Disorder Of Mitochondrial Metabolism"|"3"|"0.6"  
"15656"|"Leucovorin Calcium 5 MG Oral Tablet"|"70455"|"Rheumatoid Arthritis"|"10"|"0.909091"  
"15656"|"Leucovorin Calcium 5 MG Oral Tablet"|"257912"|"Disorder Of Mitochondrial Metabolism"|"2"|"0.5"  
"15700"|"Emcyt 140 MG Oral Capsule"|"80830"|"Malignant Neoplasm Of The Prostate Gland"|"3"|"0.75"  
"15700"|"Emcyt 140 MG Oral Capsule"|"80831"|"Adenocarcinoma Of The Prostate Gland"|"4"|"0.444444"  
"15700"|"Emcyt 140 MG Oral Capsule"|"181267"|"Carcinoma Of The Prostate Gland"|"2"|"0.666667"  
"15700"|"Emcyt 140 MG Oral Capsule"|"278812"|"Prostate Cancer"|"33"|"0.825"  
"15706"|"Levothroid 50 MCG Oral Tablet"|"69258"|"Hypothyroidism"|"14"|"0.736842"  
"15707"|"Levothroid 75 MCG Oral Tablet"|"69258"|"Hypothyroidism"|"15"|"0.75"  
"15708"|"Levothroid 88 MCG Oral Tablet"|"69258"|"Hypothyroidism"|"9"|"0.818182"  
"15709"|"Levothroid 100 MCG Oral Tablet"|"69258"|"Hypothyroidism"|"13"|"0.619048"  
"15710"|"Levothroid 137 MCG Oral Tablet"|"69258"|"Hypothyroidism"|"4"|"0.8"  
"15711"|"Levothroid 150 MCG Oral Tablet"|"69258"|"Hypothyroidism"|"8"|"0.615385"  
"15711"|"Levothroid 150 MCG Oral Tablet"|"69263"|"Secondary Hypothyroidism"|"2"|"1"  
"15712"|"Levothroid 200 MCG Oral Tablet"|"69258"|"Hypothyroidism"|"2"|"0.5"  
"15714"|"Levothyroxine Sodium 50 MCG Oral Tablet"|"69231"|"Hyperthyroidism"|"4"|"0.148148"  
"15714"|"Levothyroxine Sodium 50 MCG Oral Tablet"|"69258"|"Hypothyroidism"|"318"|"0.676596"  
"15714"|"Levothyroxine Sodium 50 MCG Oral Tablet"|"69259"|"Primary Hypothyroidism"|"12"|"0.571429"  
"15714"|"Levothyroxine Sodium 50 MCG Oral Tablet"|"69260"|"Hypothyroidism Postablative"|"2"|"0.5"  
"15714"|"Levothyroxine Sodium 50 MCG Oral Tablet"|"69262"|"Post Radio-iodine Therapy  
Hypothyroidism"|"2"|"0.666667"  
"15714"|"Levothyroxine Sodium 50 MCG Oral Tablet"|"69266"|"Congenital Hypothyroidism"|"19"|"0.826087"  
"15714"|"Levothyroxine Sodium 50 MCG Oral Tablet"|"69270"|"Thyroiditis"|"3"|"0.5"  
"15714"|"Levothyroxine Sodium 50 MCG Oral Tablet"|"69283"|"Hashimoto's Thyroiditis"|"7"|"0.538462"  
"15714"|"Levothyroxine Sodium 50 MCG Oral Tablet"|"168206"|"Subclinical Hypothyroidism"|"7"|"0.5"  
"15714"|"Levothyroxine Sodium 50 MCG Oral Tablet"|"247286"|"Thyroid Function Tests Nonspecific Abnormal  
Findings"|"3"|"0.333333"  
"15715"|"Levothyroxine Sodium 75 MCG Oral Tablet"|"68102"|"Overweight"|"2"|"0.666667"  
"15715"|"Levothyroxine Sodium 75 MCG Oral Tablet"|"69214"|"Hypopituitarism"|"4"|"0.5"  
"15715"|"Levothyroxine Sodium 75 MCG Oral Tablet"|"69258"|"Hypothyroidism"|"238"|"0.704142"

"15715"|"Levothyroxine Sodium 75 MCG Oral Tablet"|"69259"|"Primary Hypothyroidism"|"7"|"0.4375"  
"15715"|"Levothyroxine Sodium 75 MCG Oral Tablet"|"69260"|"Hypothyroidism Postablative"|"4"|"1"  
"15715"|"Levothyroxine Sodium 75 MCG Oral Tablet"|"69266"|"Congenital Hypothyroidism"|"22"|"0.758621"  
"15715"|"Levothyroxine Sodium 75 MCG Oral Tablet"|"69283"|"Hashimoto's Thyroiditis"|"4"|"0.444444"  
"15715"|"Levothyroxine Sodium 75 MCG Oral Tablet"|"69296"|"Nontoxic Multinodular Goiter"|"3"|"0.272727"  
"15715"|"Levothyroxine Sodium 75 MCG Oral Tablet"|"247286"|"Thyroid Function Tests Nonspecific Abnormal Findings"|"2"|"0.4"  
"15716"|"Levothyroxine Sodium 100 MCG Oral Tablet"|"69214"|"Hypopituitarism"|"9"|"0.692308"  
"15716"|"Levothyroxine Sodium 100 MCG Oral Tablet"|"69231"|"Hyperthyroidism"|"5"|"0.227273"  
"15716"|"Levothyroxine Sodium 100 MCG Oral Tablet"|"69258"|"Hypothyroidism"|"245"|"0.694051"  
"15716"|"Levothyroxine Sodium 100 MCG Oral Tablet"|"69259"|"Primary Hypothyroidism"|"6"|"0.5"  
"15716"|"Levothyroxine Sodium 100 MCG Oral Tablet"|"69260"|"Hypothyroidism Postablative"|"5"|"0.714286"  
"15716"|"Levothyroxine Sodium 100 MCG Oral Tablet"|"69261"|"Postsurgical Primary Hypothyroidism"|"2"|"0.333333"  
"15716"|"Levothyroxine Sodium 100 MCG Oral Tablet"|"69263"|"Secondary Hypothyroidism"|"2"|"0.5"  
"15716"|"Levothyroxine Sodium 100 MCG Oral Tablet"|"69266"|"Congenital Hypothyroidism"|"10"|"0.769231"  
"15716"|"Levothyroxine Sodium 100 MCG Oral Tablet"|"69269"|"Iatrogenic Hypothyroidism"|"2"|"0.666667"  
"15717"|"Levothyroxine Sodium 150 MCG Oral Tablet"|"69214"|"Hypopituitarism"|"3"|"1"  
"15717"|"Levothyroxine Sodium 150 MCG Oral Tablet"|"69231"|"Hyperthyroidism"|"4"|"0.190476"  
"15717"|"Levothyroxine Sodium 150 MCG Oral Tablet"|"69234"|"Graves' Disease"|"3"|"0.428571"  
"15717"|"Levothyroxine Sodium 150 MCG Oral Tablet"|"69258"|"Hypothyroidism"|"106"|"0.697368"  
"15717"|"Levothyroxine Sodium 150 MCG Oral Tablet"|"69259"|"Primary Hypothyroidism"|"4"|"0.5"  
"15717"|"Levothyroxine Sodium 150 MCG Oral Tablet"|"69260"|"Hypothyroidism Postablative"|"2"|"0.4"  
"15717"|"Levothyroxine Sodium 150 MCG Oral Tablet"|"69261"|"Postsurgical Primary Hypothyroidism"|"7"|"0.7"  
"15717"|"Levothyroxine Sodium 150 MCG Oral Tablet"|"69269"|"Iatrogenic Hypothyroidism"|"2"|"1"  
"15717"|"Levothyroxine Sodium 150 MCG Oral Tablet"|"258928"|"Thyroid Cancer"|"3"|"0.272727"  
"15718"|"Levothyroxine Sodium 200 MCG Oral Tablet"|"69214"|"Hypopituitarism"|"2"|"0.666667"  
"15718"|"Levothyroxine Sodium 200 MCG Oral Tablet"|"69258"|"Hypothyroidism"|"59"|"0.75641"  
"15718"|"Levothyroxine Sodium 200 MCG Oral Tablet"|"69261"|"Postsurgical Primary Hypothyroidism"|"3"|"0.6"  
"15718"|"Levothyroxine Sodium 200 MCG Oral Tablet"|"69293"|"Nontoxic Nodular Goiter"|"2"|"1"  
"15718"|"Levothyroxine Sodium 200 MCG Oral Tablet"|"258928"|"Thyroid Cancer"|"3"|"0.5"  
"15719"|"Levothyroxine Sodium 300 MCG Oral Tablet"|"69258"|"Hypothyroidism"|"3"|"0.6"  
"15719"|"Levothyroxine Sodium 300 MCG Oral Tablet"|"69260"|"Hypothyroidism Postablative"|"2"|"1"  
"15758"|"Lithium Carbonate 300 MG Oral Capsule"|"76272"|"Schizoaffective Disorder"|"2"|"0.666667"  
"15758"|"Lithium Carbonate 300 MG Oral Capsule"|"76307"|"Bipolar Disorder"|"4"|"0.444444"  
"15758"|"Lithium Carbonate 300 MG Oral Capsule"|"76325"|"Bipolar I Disorder, Most Recent Episode, Mixed - Moderate"|"4"|"1"  
"15758"|"Lithium Carbonate 300 MG Oral Capsule"|"76388"|"Bipolar Disorder NOS"|"5"|"0.555556"  
"15758"|"Lithium Carbonate 300 MG Oral Capsule"|"275553"|"Bipolar I Disorder, Most Recent Episode"|"2"|"1"  
"15759"|"Lithium Carbonate 300 MG Oral Tablet"|"76325"|"Bipolar I Disorder, Most Recent Episode, Mixed - Moderate"|"2"|"1"  
"15759"|"Lithium Carbonate 300 MG Oral Tablet"|"76343"|"Bipolar I Disorder, Most Recent Episode, Depressed - Moderate"|"3"|"1"  
"15759"|"Lithium Carbonate 300 MG Oral Tablet"|"76388"|"Bipolar Disorder NOS"|"4"|"0.666667"  
"15775"|"LORazepam 2 MG Oral Tablet"|"61108"|"Insomnia"|"2"|"0.2"  
"15775"|"LORazepam 2 MG Oral Tablet"|"61118"|"Anxiety (Symptom)"|"4"|"0.444444"  
"15775"|"LORazepam 2 MG Oral Tablet"|"75002"|"Partial Complex Psychomotor Seizure With Intractable Seizure"|"5"|"0.555556"  
"15775"|"LORazepam 2 MG Oral Tablet"|"75125"|"Multiple Sclerosis"|"3"|"0.6"  
"15775"|"LORazepam 2 MG Oral Tablet"|"75931"|"Anxiety Disorder Due To General Medical Condition"|"3"|"1"  
"15775"|"LORazepam 2 MG Oral Tablet"|"76536"|"Generalized Anxiety Disorder"|"2"|"0.666667"  
"15809"|"Lupron Depot 3.75 MG Intramuscular Kit"|"66070"|"Menorrhagia"|"2"|"0.5"  
"15809"|"Lupron Depot 3.75 MG Intramuscular Kit"|"80664"|"Leiomyoma Of The Uterus"|"3"|"1"  
"15955"|"Medrol 2 MG Oral Tablet"|"70500"|"Polymyalgia Rheumatica"|"3"|"0.6"

"15957"|"MedroxyPROGESTERone Acetate 2.5 MG Oral Tablet"|"195794"|"Symptomatic Menopause"|"2"|"1"  
"15965"|"Megestrol Acetate 40 MG Oral Tablet"|"60880"|"Appetite Lost (Anorexia)"|"3"|"1"  
"15965"|"Megestrol Acetate 40 MG Oral Tablet"|"80830"|"Malignant Neoplasm Of The Prostate Gland"|"2"|"0.5"  
"15965"|"Megestrol Acetate 40 MG Oral Tablet"|"278812"|"Prostate Cancer"|"2"|"1"  
"16006"|"Methadone HCl 10 MG Oral Tablet"|"251467"|"Limb Pain"|"2"|"0.333333"  
"16006"|"Methadone HCl 10 MG Oral Tablet"|"288921"|"Chronic Pain"|"2"|"0.2"  
"16007"|"Methadone HCl 5 MG Oral Tablet"|"31947"|"Lumbago"|"2"|"0.5"  
"16007"|"Methadone HCl 5 MG Oral Tablet"|"91089"|"Lower Back Pain"|"2"|"0.5"  
"16007"|"Methadone HCl 5 MG Oral Tablet"|"288894"|"Pain Syndromes"|"2"|"1"  
"16016"|"Methocarbamol 500 MG Oral Tablet"|"73666"|"Backache"|"3"|"0.3"  
"16016"|"Methocarbamol 500 MG Oral Tablet"|"75579"|"Spondylosis Without Myelopathy"|"2"|"0.666667"  
"16016"|"Methocarbamol 500 MG Oral Tablet"|"75717"|"Cervicalgia"|"2"|"0.4"  
"16016"|"Methocarbamol 500 MG Oral Tablet"|"75811"|"Muscle Spasm"|"8"|"1"  
"16016"|"Methocarbamol 500 MG Oral Tablet"|"91089"|"Lower Back Pain"|"6"|"0.545455"  
"16016"|"Methocarbamol 500 MG Oral Tablet"|"172080"|"Neck Strain"|"7"|"0.875"  
"16016"|"Methocarbamol 500 MG Oral Tablet"|"288977"|"Fibromyalgia"|"2"|"0.4"  
"16017"|"Methotrexate 2.5 MG Oral Tablet"|"67760"|"Connective Tissue Defect"|"2"|"1"  
"16017"|"Methotrexate 2.5 MG Oral Tablet"|"69824"|"Morphea (Localized Scleroderma)"|"5"|"0.714286"  
"16017"|"Methotrexate 2.5 MG Oral Tablet"|"70455"|"Rheumatoid Arthritis"|"274"|"0.864353"  
"16017"|"Methotrexate 2.5 MG Oral Tablet"|"70460"|"Adult Still's Disease"|"2"|"1"  
"16017"|"Methotrexate 2.5 MG Oral Tablet"|"70461"|"Juvenile Rheumatoid Arthritis"|"4"|"1"  
"16017"|"Methotrexate 2.5 MG Oral Tablet"|"70472"|"Systemic Lupus Erythematosus"|"18"|"0.580645"  
"16017"|"Methotrexate 2.5 MG Oral Tablet"|"70474"|"Mixed Connective Tissue Disease"|"2"|"0.666667"  
"16017"|"Methotrexate 2.5 MG Oral Tablet"|"70475"|"Scleroderma"|"23"|"0.522727"  
"16017"|"Methotrexate 2.5 MG Oral Tablet"|"70500"|"Polymyalgia Rheumatica"|"7"|"0.538462"  
"16017"|"Methotrexate 2.5 MG Oral Tablet"|"70550"|"Relapsing Polychondritis"|"3"|"1"  
"16017"|"Methotrexate 2.5 MG Oral Tablet"|"70598"|"Polymyositis / Dermatomyositis:"|"9"|"0.75"  
"16017"|"Methotrexate 2.5 MG Oral Tablet"|"70599"|"Typical Polymyositis (Type I)"|"2"|"1"  
"16017"|"Methotrexate 2.5 MG Oral Tablet"|"70600"|"Typical Dermatomyositis (Type II)"|"3"|"0.5"  
"16017"|"Methotrexate 2.5 MG Oral Tablet"|"70604"|"Polymyositis In Other Collagen Vascular Disease"|"2"|"1"  
"16017"|"Methotrexate 2.5 MG Oral Tablet"|"70607"|"Polymyositis In Scleroderma"|"2"|"0.5"  
"16017"|"Methotrexate 2.5 MG Oral Tablet"|"70620"|"Sarcoidosis"|"7"|"0.636364"  
"16017"|"Methotrexate 2.5 MG Oral Tablet"|"70640"|"Wegener's Granulomatosis"|"5"|"0.714286"  
"16017"|"Methotrexate 2.5 MG Oral Tablet"|"70664"|"Takayasu's Disease"|"2"|"1"  
"16017"|"Methotrexate 2.5 MG Oral Tablet"|"70681"|"Polyarthritits"|"2"|"0.666667"  
"16017"|"Methotrexate 2.5 MG Oral Tablet"|"70704"|"Symmetric Polyarticular Inflammation"|"18"|"0.75"  
"16017"|"Methotrexate 2.5 MG Oral Tablet"|"70706"|"Ankylosing Spondylitis"|"5"|"0.833333"  
"16017"|"Methotrexate 2.5 MG Oral Tablet"|"70719"|"Psoriatic Arthropathy"|"26"|"0.866667"  
"16017"|"Methotrexate 2.5 MG Oral Tablet"|"70722"|"Spondylitis"|"2"|"0.666667"  
"16017"|"Methotrexate 2.5 MG Oral Tablet"|"85658"|"Diffuse Joint Pains (Arthralgias)"|"3"|"0.333333"  
"16017"|"Methotrexate 2.5 MG Oral Tablet"|"257996"|"Arthritis"|"6"|"0.15"  
"16017"|"Methotrexate 2.5 MG Oral Tablet"|"296649"|"Diffuse Connective Tissue Disorder"|"4"|"1"  
"16018"|"Methotrexate Sodium 25 MG/ML Injection Solution"|"70455"|"Rheumatoid Arthritis"|"36"|"0.923077"  
"16018"|"Methotrexate Sodium 25 MG/ML Injection Solution"|"70550"|"Relapsing Polychondritis"|"2"|"1"  
"16018"|"Methotrexate Sodium 25 MG/ML Injection Solution"|"70598"|"Polymyositis / Dermatomyositis:"|"2"|"1"  
"16018"|"Methotrexate Sodium 25 MG/ML Injection Solution"|"70607"|"Polymyositis In Scleroderma"|"2"|"1"  
"16018"|"Methotrexate Sodium 25 MG/ML Injection Solution"|"70704"|"Symmetric Polyarticular Inflammation"|"7"|"1"  
"16018"|"Methotrexate Sodium 25 MG/ML Injection Solution"|"70719"|"Psoriatic Arthropathy"|"7"|"0.875"  
"16044"|"Estrace 0.1 MG/GM Vaginal Cream"|"66073"|"Menopause"|"5"|"0.625"  
"16044"|"Estrace 0.1 MG/GM Vaginal Cream"|"66218"|"Postmenopausal Atrophic Vaginitis"|"4"|"1"  
"16044"|"Estrace 0.1 MG/GM Vaginal Cream"|"66257"|"Vulvar Atrophy"|"2"|"1"  
"16044"|"Estrace 0.1 MG/GM Vaginal Cream"|"88022"|"Vaginal Itching"|"3"|"0.75"  
"16089"|"Felbatol 600 MG/5ML Oral Suspension"|"74988"|"Seizure Disorder"|"2"|"1"

"16089"|"Felbatol 600 MG/5ML Oral Suspension"|"75002"|"Partial Complex Psychomotor Seizure With Intractable Seizure"|"2"|"1"

"16090"|"Felbatol 400 MG Oral Tablet"|"75002"|"Partial Complex Psychomotor Seizure With Intractable Seizure"|"3"|"1"

"16091"|"Felbatol 600 MG Oral Tablet"|"75002"|"Partial Complex Psychomotor Seizure With Intractable Seizure"|"7"|"1"

"16091"|"Felbatol 600 MG Oral Tablet"|"252552"|"Generalized Convulsive Tonic-clonic Seizure With Intractable Seizure"|"2"|"1"

"16091"|"Felbatol 600 MG Oral Tablet"|"252570"|"Partial Complex Seizure With Secondary Generalization With Intractable Seizure"|"2"|"0.666667"

"16110"|"Methyldopa 250 MG Oral Tablet"|"63467"|"Hypertension"|"10"|"0.714286"

"16110"|"Methyldopa 250 MG Oral Tablet"|"63470"|"Benign Essential Hypertension"|"3"|"0.75"

"16111"|"Methyldopa 500 MG Oral Tablet"|"63467"|"Hypertension"|"3"|"0.3"

"16111"|"Methyldopa 500 MG Oral Tablet"|"63468"|"Essential Hypertension"|"2"|"0.666667"

"16111"|"Methyldopa 500 MG Oral Tablet"|"63470"|"Benign Essential Hypertension"|"2"|"0.4"

"16111"|"Methyldopa 500 MG Oral Tablet"|"66386"|"Pregnancy Complicated By Hypertension - Antepartum Condition Or Prior Complicated Delivery"|"2"|"1"

"16113"|"Methylphenidate HCl 10 MG Oral Tablet"|"75818"|"Attention-deficit Hyperactivity Disorder"|"10"|"0.833333"

"16113"|"Methylphenidate HCl 10 MG Oral Tablet"|"75819"|"ADHD, Predominantly Inattentive Type"|"3"|"1"

"16113"|"Methylphenidate HCl 10 MG Oral Tablet"|"275486"|"ADHD, Combined Type"|"2"|"1"

"16113"|"Methylphenidate HCl 10 MG Oral Tablet"|"291687"|"Attention Deficit Disorder Without Hyperactivity"|"4"|"1"

"16114"|"Methylphenidate HCl 20 MG Oral Tablet"|"75818"|"Attention-deficit Hyperactivity Disorder"|"3"|"1"

"16114"|"Methylphenidate HCl 20 MG Oral Tablet"|"75819"|"ADHD, Predominantly Inattentive Type"|"2"|"0.5"

"16114"|"Methylphenidate HCl 20 MG Oral Tablet"|"291687"|"Attention Deficit Disorder Without Hyperactivity"|"2"|"1"

"16117"|"MethylPREDNISolone 4 MG Oral Tablet"|"62588"|"Chronic Ethmoidal Sinusitis"|"2"|"1"

"16117"|"MethylPREDNISolone 4 MG Oral Tablet"|"70455"|"Rheumatoid Arthritis"|"5"|"0.833333"

"16124"|"MetroNIDAZOLE 250 MG Oral Tablet"|"60902"|"Diarrhea (Symptom)"|"4"|"0.571429"

"16124"|"MetroNIDAZOLE 250 MG Oral Tablet"|"64632"|"Giardiasis"|"2"|"1"

"16124"|"MetroNIDAZOLE 250 MG Oral Tablet"|"64934"|"Small Bowel Bacterial Overgrowth"|"5"|"0.625"

"16124"|"MetroNIDAZOLE 250 MG Oral Tablet"|"64980"|"Crohn's Disease"|"2"|"0.4"

"16124"|"MetroNIDAZOLE 250 MG Oral Tablet"|"70475"|"Scleroderma"|"3"|"0.6"

"16124"|"MetroNIDAZOLE 250 MG Oral Tablet"|"77692"|"Amebiasis"|"2"|"1"

"16124"|"MetroNIDAZOLE 250 MG Oral Tablet"|"166767"|"Infectious Diarrhea"|"2"|"0.666667"

"16125"|"MetroNIDAZOLE Powder"|"60902"|"Diarrhea (Symptom)"|"3"|"0.75"

"16125"|"MetroNIDAZOLE Powder"|"64643"|"Nonpathogenic Protozoal Intestinal Disease (Endolimax)"|"2"|"1"

"16125"|"MetroNIDAZOLE Powder"|"64934"|"Small Bowel Bacterial Overgrowth"|"3"|"1"

"16125"|"MetroNIDAZOLE Powder"|"65035"|"Acute Colitis"|"2"|"1"

"16142"|"Ortho Micronor 0.35 MG Oral Tablet"|"85949"|"Birth Control Method - Oral Contraceptives"|"2"|"1"

"16142"|"Ortho Micronor 0.35 MG Oral Tablet"|"187792"|"Gynecologic Services Contraceptive Management"|"6"|"0.75"

"16142"|"Ortho Micronor 0.35 MG Oral Tablet"|"187793"|"Gynecologic Services Contraceptive General Counseling"|"2"|"1"

"16142"|"Ortho Micronor 0.35 MG Oral Tablet"|"250989"|"Oral Contraceptives"|"2"|"0.666667"

"16158"|"Minocin 100 MG Oral Capsule"|"70475"|"Scleroderma"|"2"|"1"

"16159"|"Minoxidil 10 MG Oral Tablet"|"63467"|"Hypertension"|"4"|"0.307692"

"16159"|"Minoxidil 10 MG Oral Tablet"|"63470"|"Benign Essential Hypertension"|"2"|"0.333333"

"16160"|"Minoxidil 2.5 MG Oral Tablet"|"63467"|"Hypertension"|"11"|"0.354839"

"16160"|"Minoxidil 2.5 MG Oral Tablet"|"63468"|"Essential Hypertension"|"4"|"0.5"

"16160"|"Minoxidil 2.5 MG Oral Tablet"|"63470"|"Benign Essential Hypertension"|"3"|"0.272727"

"16205"|"Ferrous Sulfate 220 (44 Fe) MG/5ML Oral Elixir"|"77962"|"Anemia"|"17"|"0.53125"

"16205"|"Ferrous Sulfate 220 (44 Fe) MG/5ML Oral Elixir"|"77968"|"Iron Deficiency"|"6"|"0.5"

"16205"|"Ferrous Sulfate 220 (44 Fe) MG/5ML Oral Elixir"|"77970"|"Iron Deficiency Anemia Secondary To Inadequate Dietary Iron Intake"|"3"|"0.75"

"16205"|"Ferrous Sulfate 220 (44 Fe) MG/5ML Oral Elixir"|"274606"|"Chronic Kidney Disease, Stage 3"|"2"|"0.25"

"16218"|"Fish Oil 1000 MG Oral Capsule"|"291485"|"Dyslipidemia"|"4"|"0.25"

"16222"|"Fleet Enema 7-19 GM/118ML Rectal Enema"|"65055"|"Chronic Constipation"|"3"|"1"

"16222"|"Fleet Enema 7-19 GM/118ML Rectal Enema"|"166777"|"Constipation"|"2"|"0.666667"

"16230"|"Flexeril 10 MG Oral Tablet"|"73666"|"Backache"|"2"|"0.2"

"16230"|"Flexeril 10 MG Oral Tablet"|"91089"|"Lower Back Pain"|"3"|"0.166667"

"16241"|"Fluocinonide 0.05 % External Ointment"|"69710"|"Contact Dermatitis"|"2"|"0.666667"

"16241"|"Fluocinonide 0.05 % External Ointment"|"70112"|"Atopic Dermatitis"|"2"|"0.5"

"16241"|"Fluocinonide 0.05 % External Ointment"|"278317"|"Dermatitis Due To Contact With Poison Ivy"|"2"|"1"

"16241"|"Fluocinonide 0.05 % External Ointment"|"278350"|"Eczema"|"11"|"0.916667"

"16252"|"Motrin IB 200 MG Oral Tablet"|"80664"|"Leiomyoma Of The Uterus"|"2"|"0.5"

"16330"|"Nadolol 40 MG Oral Tablet"|"63467"|"Hypertension"|"3"|"0.5"

"16331"|"Nadolol 80 MG Oral Tablet"|"63467"|"Hypertension"|"3"|"0.428571"

"16333"|"Naftin 1 % External Cream"|"70455"|"Rheumatoid Arthritis"|"2"|"1"

"16360"|"Naphcon-A 0.025-0.3 % Ophthalmic Solution"|"61421"|"Acute Vernal Conjunctivitis"|"3"|"0.75"

"16360"|"Naphcon-A 0.025-0.3 % Ophthalmic Solution"|"61433"|"Chronic Allergic Conjunctivitis"|"2"|"0.666667"

"16363"|"Naproxen 375 MG Oral Tablet"|"60828"|"Headache"|"4"|"0.333333"

"16363"|"Naproxen 375 MG Oral Tablet"|"66133"|"Dysmenorrhea"|"3"|"1"

"16363"|"Naproxen 375 MG Oral Tablet"|"70146"|"Osteoarthritis"|"5"|"0.625"

"16363"|"Naproxen 375 MG Oral Tablet"|"73666"|"Backache"|"3"|"0.230769"

"16363"|"Naproxen 375 MG Oral Tablet"|"74530"|"Tension-type Headache"|"2"|"0.333333"

"16363"|"Naproxen 375 MG Oral Tablet"|"85614"|"Joint Pain, Localized In The Hip"|"2"|"0.4"

"16363"|"Naproxen 375 MG Oral Tablet"|"91089"|"Lower Back Pain"|"4"|"0.363636"

"16363"|"Naproxen 375 MG Oral Tablet"|"92456"|"Joint Pain, Localized In More Than One Joint"|"3"|"0.6"

"16363"|"Naproxen 375 MG Oral Tablet"|"257996"|"Arthritis"|"4"|"0.4"

"16363"|"Naproxen 375 MG Oral Tablet"|"278685"|"Arthralgias In Multiple Sites"|"4"|"0.8"

"16392"|"FluPHENAZine HCl 10 MG Oral Tablet"|"76232"|"Paranoid Schizophrenia"|"2"|"1"

"16392"|"FluPHENAZine HCl 10 MG Oral Tablet"|"76238"|"Paranoid Schizophrenia, Stable"|"3"|"0.75"

"16393"|"FluPHENAZine HCl 2.5 MG Oral Tablet"|"76272"|"Schizoaffective Disorder"|"2"|"1"

"16394"|"FluPHENAZine HCl 5 MG Oral Tablet"|"76232"|"Paranoid Schizophrenia"|"5"|"1"

"16394"|"FluPHENAZine HCl 5 MG Oral Tablet"|"76234"|"Paranoid Schizophrenia, Chronic"|"2"|"0.666667"

"16394"|"FluPHENAZine HCl 5 MG Oral Tablet"|"76238"|"Paranoid Schizophrenia, Stable"|"2"|"0.666667"

"16394"|"FluPHENAZine HCl 5 MG Oral Tablet"|"76276"|"Schizoaffective Disorder - Chronic (With Residual Symptoms)"|"2"|"0.666667"

"16474"|"Nephron FA Oral Tablet"|"77968"|"Iron Deficiency"|"6"|"0.4"

"16474"|"Nephron FA Oral Tablet"|"274606"|"Chronic Kidney Disease, Stage 3"|"4"|"0.25"

"16474"|"Nephron FA Oral Tablet"|"274672"|"Chronic Kidney Disease, Stage 4"|"2"|"0.222222"

"16474"|"Nephron FA Oral Tablet"|"278753"|"Anemia Of Chronic Kidney Disease"|"5"|"0.333333"

"16495"|"Niacin CR 500 MG Oral Capsule Extended Release"|"67970"|"Hyperlipidemia"|"3"|"0.333333"

"16497"|"Niacin 250 MG Oral Tablet"|"291485"|"Dyslipidemia"|"2"|"0.666667"

"16517"|"Nitrofurantoin Macrocrystal 100 MG Oral Capsule"|"60928"|"Pain During Urination (Dysuria)"|"5"|"0.384615"

"16517"|"Nitrofurantoin Macrocrystal 100 MG Oral Capsule"|"65752"|"Cystitis"|"3"|"0.5"

"16517"|"Nitrofurantoin Macrocrystal 100 MG Oral Capsule"|"65753"|"Acute Cystitis"|"4"|"0.8"

"16517"|"Nitrofurantoin Macrocrystal 100 MG Oral Capsule"|"65755"|"Chronic Cystitis"|"2"|"0.666667"

"16517"|"Nitrofurantoin Macrocrystal 100 MG Oral Capsule"|"65762"|"Urinary Tract Infection"|"35"|"0.729167"

"16518"|"Nitrofurantoin Macrocrystal 50 MG Oral Capsule"|"65755"|"Chronic Cystitis"|"2"|"0.666667"

"16518"|"Nitrofurantoin Macrocrystal 50 MG Oral Capsule"|"65762"|"Urinary Tract Infection"|"12"|"0.571429"

"16522"|"Nitroglycerin 0.4 MG SUBL"|"62975"|"Coronary Artery Disease"|"8"|"0.2"

"16555"|"Nortriptyline HCl 25 MG Oral Capsule"|"60899"|"Abdominal Pain"|"2"|"0.666667"

"16555"|"Nortriptyline HCl 25 MG Oral Capsule"|"61108"|"Insomnia"|"2"|"0.5"

"16555"|"Nortriptyline HCl 25 MG Oral Capsule"|"74533"|"Migraine Headache"|"3"|"0.428571"

"16556"|"Norvasc 10 MG Oral Tablet"|"63467"|"Hypertension"|"15"|"0.120968"  
"16556"|"Norvasc 10 MG Oral Tablet"|"63470"|"Benign Essential Hypertension"|"7"|"0.194444"  
"16556"|"Norvasc 10 MG Oral Tablet"|"70475"|"Scleroderma"|"2"|"1"  
"16558"|"Norvasc 5 MG Oral Tablet"|"63468"|"Essential Hypertension"|"6"|"0.176471"  
"16558"|"Norvasc 5 MG Oral Tablet"|"63470"|"Benign Essential Hypertension"|"3"|"0.166667"  
"16558"|"Norvasc 5 MG Oral Tablet"|"63758"|"Raynaud's Disease"|"2"|"0.5"  
"16558"|"Norvasc 5 MG Oral Tablet"|"63759"|"Raynaud's Phenomenon"|"2"|"0.666667"  
"16567"|"NovoLIN 70/30 70-30 % Subcutaneous Suspension"|"69380"|"Diabetes Mellitus"|"11"|"0.354839"  
"16567"|"NovoLIN 70/30 70-30 % Subcutaneous Suspension"|"69381"|"Type II Diabetes Mellitus"|"4"|"0.4"  
"16567"|"NovoLIN 70/30 70-30 % Subcutaneous Suspension"|"69402"|"Diabetes Mellitus Poorly  
Controlled"|"6"|"0.461538"  
"16569"|"NovoLIN R 100 UNIT/ML Injection Solution"|"66433"|"Pregnancy Complicated By Diabetes  
Mellitus"|"14"|"0.933333"  
"16569"|"NovoLIN R 100 UNIT/ML Injection Solution"|"69380"|"Diabetes Mellitus"|"14"|"0.311111"  
"16569"|"NovoLIN R 100 UNIT/ML Injection Solution"|"69381"|"Type II Diabetes Mellitus"|"3"|"0.230769"  
"16569"|"NovoLIN R 100 UNIT/ML Injection Solution"|"69382"|"Type II Diabetes Mellitus - Uncomplicated,  
Uncontrolled"|"3"|"0.5"  
"16569"|"NovoLIN R 100 UNIT/ML Injection Solution"|"69402"|"Diabetes Mellitus Poorly Controlled"|"9"|"0.642857"  
"16598"|"Nystatin 100000 UNIT/GM External Ointment"|"70115"|"Dermatophytosis"|"2"|"1"  
"16598"|"Nystatin 100000 UNIT/GM External Ointment"|"70130"|"Diaper Rash"|"38"|"0.575758"  
"16598"|"Nystatin 100000 UNIT/GM External Ointment"|"77205"|"Candidiasis"|"22"|"0.52381"  
"16598"|"Nystatin 100000 UNIT/GM External Ointment"|"77210"|"Cutaneous Candidiasis"|"34"|"0.723404"  
"16598"|"Nystatin 100000 UNIT/GM External Ointment"|"77216"|"Genitourinary Candidiasis"|"6"|"0.666667"  
"16598"|"Nystatin 100000 UNIT/GM External Ointment"|"88375"|"Skin: A Rash"|"4"|"0.444444"  
"16598"|"Nystatin 100000 UNIT/GM External Ointment"|"93705"|"Dermatitis"|"5"|"0.5"  
"16598"|"Nystatin 100000 UNIT/GM External Ointment"|"173522"|"Candidal Intertrigo"|"2"|"0.333333"  
"16598"|"Nystatin 100000 UNIT/GM External Ointment"|"189833"|"Tracheostomy Care Requirement"|"2"|"0.333333"  
"16598"|"Nystatin 100000 UNIT/GM External Ointment"|"278139"|"Neonatal Candidiasis Of The Diaper  
Region"|"35"|"0.7"  
"16610"|"Furadantin 25 MG/5ML Oral Suspension"|"65745"|"Vesicoureteral Reflux"|"4"|"0.5"  
"16610"|"Furadantin 25 MG/5ML Oral Suspension"|"65762"|"Urinary Tract Infection"|"7"|"0.388889"  
"16610"|"Furadantin 25 MG/5ML Oral Suspension"|"65769"|"Neurogenic Bladder"|"2"|"1"  
"16612"|"Furosemide 10 MG/ML Oral Solution"|"63490"|"Congenital Heart Disease"|"8"|"0.296296"  
"16612"|"Furosemide 10 MG/ML Oral Solution"|"63496"|"Tetralogy Of Fallot"|"3"|"0.333333"  
"16612"|"Furosemide 10 MG/ML Oral Solution"|"63499"|"Atrial Septal Defect"|"3"|"0.166667"  
"16612"|"Furosemide 10 MG/ML Oral Solution"|"63516"|"Tricuspid Atresia"|"3"|"0.6"  
"16612"|"Furosemide 10 MG/ML Oral Solution"|"63526"|"Hypoplastic Left Heart Syndrome"|"7"|"0.583333"  
"16612"|"Furosemide 10 MG/ML Oral Solution"|"63598"|"Ventricular Septal Defect"|"14"|"0.325581"  
"16612"|"Furosemide 10 MG/ML Oral Solution"|"63629"|"Patent Ductus Arteriosus"|"3"|"0.2"  
"16612"|"Furosemide 10 MG/ML Oral Solution"|"63634"|"Total Anomalous Pulmonary Venous Return"|"2"|"0.5"  
"16612"|"Furosemide 10 MG/ML Oral Solution"|"63645"|"Complete D-transposition Of The Great Vessels"|"2"|"1"  
"16612"|"Furosemide 10 MG/ML Oral Solution"|"67885"|"Bronchopulmonary Dysplasia Of Fetus Or  
Newborn"|"3"|"0.5"  
"16613"|"Furosemide 80 MG Oral Tablet"|"63217"|"Congestive Heart Failure"|"18"|"0.473684"  
"16613"|"Furosemide 80 MG Oral Tablet"|"63468"|"Essential Hypertension"|"3"|"0.130435"  
"16613"|"Furosemide 80 MG Oral Tablet"|"274672"|"Chronic Kidney Disease, Stage 4"|"2"|"0.285714"  
"16636"|"Gemfibrozil 600 MG Oral Tablet"|"67969"|"Familial Combined Hyperlipidemia"|"3"|"0.428571"  
"16636"|"Gemfibrozil 600 MG Oral Tablet"|"67970"|"Hyperlipidemia"|"71"|"0.455128"  
"16636"|"Gemfibrozil 600 MG Oral Tablet"|"257908"|"Essential Hypertriglyceridemia"|"8"|"0.380952"  
"16636"|"Gemfibrozil 600 MG Oral Tablet"|"283292"|"Essential Hypercholesterolemia"|"4"|"0.285714"  
"16636"|"Gemfibrozil 600 MG Oral Tablet"|"291485"|"Dyslipidemia"|"13"|"0.65"  
"16744"|"Oxycodone-Acetaminophen 5-325 MG Oral Tablet"|"62745"|"Tonsillar Hypertrophy"|"2"|"1"  
"16746"|"Oxymetazoline HCl 0.05 % Nasal Solution"|"62577"|"Sinusitis"|"2"|"0.5"  
"16746"|"Oxymetazoline HCl 0.05 % Nasal Solution"|"62598"|"Allergic Rhinitis"|"10"|"0.588235"

"16746"|"Oxymetazoline HCl 0.05 % Nasal Solution"|"77890"|"Upper Respiratory Infection"|"2"|"0.5"  
"16746"|"Oxymetazoline HCl 0.05 % Nasal Solution"|"77891"|"Acute Upper Respiratory Infection"|"2"|"0.25"  
"16761"|"PEG 3350/Electrolytes 240 GM Oral Solution Reconstituted"|"166777"|"Constipation"|"2"|"0.666667"  
"16794"|"Gentamicin Sulfate 0.3 % Ophthalmic Solution"|"61418"|"Acute Conjunctivitis"|"2"|"1"  
"16795"|"Gentian Violet 1 % External Solution"|"77205"|"Candidiasis"|"2"|"1"  
"16795"|"Gentian Violet 1 % External Solution"|"278139"|"Neonatal Candidiasis Of The Diaper Region"|"2"|"0.4"  
"16796"|"Gentian Violet 2 % External Solution"|"77206"|"Oral Thrush"|"2"|"1"  
"16825"|"GlyBURIDE 5 MG Oral Tablet"|"69380"|"Diabetes Mellitus"|"37"|"0.362745"  
"16825"|"GlyBURIDE 5 MG Oral Tablet"|"69381"|"Type II Diabetes Mellitus"|"20"|"0.384615"  
"16825"|"GlyBURIDE 5 MG Oral Tablet"|"69382"|"Type II Diabetes Mellitus - Uncomplicated, Uncontrolled"|"9"|"0.473684"  
"16825"|"GlyBURIDE 5 MG Oral Tablet"|"69395"|"Gestational Diabetes Mellitus"|"4"|"0.666667"  
"16825"|"GlyBURIDE 5 MG Oral Tablet"|"69401"|"Diabetes Mellitus Under Control"|"3"|"0.375"  
"16825"|"GlyBURIDE 5 MG Oral Tablet"|"69402"|"Diabetes Mellitus Poorly Controlled"|"23"|"0.547619"  
"16825"|"GlyBURIDE 5 MG Oral Tablet"|"258942"|"Type II Diabetes Mellitus - Uncomplicated, Controlled"|"2"|"0.333333"  
"16847"|"PediaSure/Fiber Oral Liquid"|"292064"|"Dysphagia"|"4"|"0.666667"  
"16905"|"PHENobarbital 15 MG Oral Tablet"|"74988"|"Seizure Disorder"|"7"|"0.875"  
"16934"|"Gris-PEG 125 MG Oral Tablet"|"70116"|"Tinea Capitis"|"8"|"0.666667"  
"16935"|"Gris-PEG 250 MG Oral Tablet"|"70115"|"Dermatophytosis"|"2"|"0.666667"  
"16935"|"Gris-PEG 250 MG Oral Tablet"|"70116"|"Tinea Capitis"|"12"|"0.571429"  
"16935"|"Gris-PEG 250 MG Oral Tablet"|"70124"|"Tinea Corporis"|"2"|"0.285714"  
"16936"|"Griseofulvin Ultramicrosize 250 MG Oral Tablet"|"70116"|"Tinea Capitis"|"20"|"0.625"  
"16936"|"Griseofulvin Ultramicrosize 250 MG Oral Tablet"|"70124"|"Tinea Corporis"|"2"|"0.285714"  
"16941"|"Guiatuss 100 MG/5ML Oral Syrup"|"60869"|"Cough"|"2"|"0.5"  
"16942"|"Guiatuss AC 100-10 MG/5ML Oral Syrup"|"60869"|"Cough"|"5"|"0.625"  
"16942"|"Guiatuss AC 100-10 MG/5ML Oral Syrup"|"64118"|"Acute Bronchitis"|"2"|"0.666667"  
"16942"|"Guiatuss AC 100-10 MG/5ML Oral Syrup"|"77891"|"Acute Upper Respiratory Infection"|"2"|"0.4"  
"16942"|"Guiatuss AC 100-10 MG/5ML Oral Syrup"|"277872"|"Asthmatic Bronchitis"|"2"|"1"  
"16962"|"Haloperidol 1 MG Oral Tablet"|"61108"|"Insomnia"|"2"|"0.285714"  
"16962"|"Haloperidol 1 MG Oral Tablet"|"75020"|"Alzheimer's Disease"|"2"|"0.666667"  
"16962"|"Haloperidol 1 MG Oral Tablet"|"76388"|"Bipolar Disorder NOS"|"3"|"0.75"  
"16963"|"Haloperidol 10 MG Oral Tablet"|"76232"|"Paranoid Schizophrenia"|"7"|"0.875"  
"16963"|"Haloperidol 10 MG Oral Tablet"|"76233"|"Paranoid Schizophrenia, Subchronic"|"2"|"1"  
"16963"|"Haloperidol 10 MG Oral Tablet"|"76234"|"Paranoid Schizophrenia, Chronic"|"2"|"1"  
"16963"|"Haloperidol 10 MG Oral Tablet"|"76250"|"Residual Schizophrenia"|"2"|"1"  
"16963"|"Haloperidol 10 MG Oral Tablet"|"76272"|"Schizoaffective Disorder"|"3"|"1"  
"16963"|"Haloperidol 10 MG Oral Tablet"|"76276"|"Schizoaffective Disorder - Chronic (With Residual Symptoms)"|"2"|"0.666667"  
"16963"|"Haloperidol 10 MG Oral Tablet"|"76388"|"Bipolar Disorder NOS"|"2"|"1"  
"16964"|"Haloperidol 2 MG Oral Tablet"|"76272"|"Schizoaffective Disorder"|"4"|"1"  
"16964"|"Haloperidol 2 MG Oral Tablet"|"76325"|"Bipolar I Disorder, Most Recent Episode, Mixed - Moderate"|"2"|"1"  
"16964"|"Haloperidol 2 MG Oral Tablet"|"76388"|"Bipolar Disorder NOS"|"2"|"0.666667"  
"16975"|"Phenytoin 125 MG/5ML Oral Suspension"|"74988"|"Seizure Disorder"|"3"|"0.5"  
"17011"|"Haloperidol 5 MG Oral Tablet"|"76213"|"Schizophrenia"|"3"|"1"  
"17011"|"Haloperidol 5 MG Oral Tablet"|"76232"|"Paranoid Schizophrenia"|"5"|"0.714286"  
"17011"|"Haloperidol 5 MG Oral Tablet"|"76238"|"Paranoid Schizophrenia, Stable"|"3"|"1"  
"17011"|"Haloperidol 5 MG Oral Tablet"|"76272"|"Schizoaffective Disorder"|"6"|"0.857143"  
"17055"|"Piroxicam 20 MG Oral Capsule"|"70455"|"Rheumatoid Arthritis"|"4"|"1"  
"17055"|"Piroxicam 20 MG Oral Capsule"|"70706"|"Ankylosing Spondylitis"|"2"|"0.666667"  
"17055"|"Piroxicam 20 MG Oral Capsule"|"91089"|"Lower Back Pain"|"2"|"0.4"  
"17055"|"Piroxicam 20 MG Oral Capsule"|"288977"|"Fibromyalgia"|"2"|"0.5"  
"17100"|"Ponstel 250 MG Oral Capsule"|"66133"|"Dysmenorrhea"|"2"|"0.5"

"17100"|"Ponstel 250 MG Oral Capsule"|"88058"|"Severe Menstrual Pain (Dysmenorrhea)"|"4"|"1"  
"17108"|"Potassium Chloride 20 MEQ Oral Packet"|"68089"|"Hypokalemia"|"4"|"0.444444"  
"17108"|"Potassium Chloride 20 MEQ Oral Packet"|"282680"|"Edema"|"2"|"0.666667"  
"17120"|"Pravachol 40 MG Oral Tablet"|"67970"|"Hyperlipidemia"|"4"|"0.2"  
"17121"|"Prazosin HCl 1 MG Oral Capsule"|"76587"|"Anxiety Disorder NOS"|"2"|"1"  
"17121"|"Prazosin HCl 1 MG Oral Capsule"|"275592"|"Post-traumatic Stress Disorder"|"4"|"0.8"  
"17134"|"PredniSONE 5 MG/5ML Oral Solution"|"64181"|"Asthma"|"3"|"0.375"  
"17134"|"PredniSONE 5 MG/5ML Oral Solution"|"69214"|"Hypopituitarism"|"3"|"1"  
"17134"|"PredniSONE 5 MG/5ML Oral Solution"|"69464"|"Congenital Adrenal Hyperplasia"|"5"|"0.833333"  
"17140"|"Premarin 0.9 MG Oral Tablet"|"60977"|"Menopause Has Occurred"|"2"|"0.666667"  
"17140"|"Premarin 0.9 MG Oral Tablet"|"195794"|"Symptomatic Menopause"|"4"|"1"  
"17141"|"Premarin 0.625 MG/GM Vaginal Cream"|"65753"|"Acute Cystitis"|"2"|"0.25"  
"17141"|"Premarin 0.625 MG/GM Vaginal Cream"|"66073"|"Menopause"|"7"|"0.5"  
"17141"|"Premarin 0.625 MG/GM Vaginal Cream"|"66076"|"Menopausal Disorder"|"4"|"0.8"  
"17141"|"Premarin 0.625 MG/GM Vaginal Cream"|"66204"|"Vaginal Adhesions (Postoperative)"|"2"|"1"  
"17141"|"Premarin 0.625 MG/GM Vaginal Cream"|"66211"|"Vaginal Wall Prolapse"|"2"|"0.666667"  
"17141"|"Premarin 0.625 MG/GM Vaginal Cream"|"66218"|"Postmenopausal Atrophic Vaginitis"|"29"|"0.707317"  
"17141"|"Premarin 0.625 MG/GM Vaginal Cream"|"66257"|"Vulvar Atrophy"|"4"|"0.8"  
"17141"|"Premarin 0.625 MG/GM Vaginal Cream"|"88022"|"Vaginal Itching"|"2"|"0.666667"  
"17141"|"Premarin 0.625 MG/GM Vaginal Cream"|"93473"|"Taking Female Hormones For Postmenopausal  
HRT"|"2"|"0.666667"  
"17141"|"Premarin 0.625 MG/GM Vaginal Cream"|"116877"|"Female Genitalia Labial Adhesions"|"3"|"0.428571"  
"17141"|"Premarin 0.625 MG/GM Vaginal Cream"|"195794"|"Symptomatic Menopause"|"4"|"0.333333"  
"17152"|"HumuLIN 70/30 70-30 % Subcutaneous Suspension"|"69380"|"Diabetes Mellitus"|"5"|"0.208333"  
"17152"|"HumuLIN 70/30 70-30 % Subcutaneous Suspension"|"69381"|"Type II Diabetes Mellitus"|"5"|"0.357143"  
"17152"|"HumuLIN 70/30 70-30 % Subcutaneous Suspension"|"69387"|"Type I Diabetes Mellitus"|"3"|"0.75"  
"17152"|"HumuLIN 70/30 70-30 % Subcutaneous Suspension"|"69402"|"Diabetes Mellitus Poorly  
Controlled"|"9"|"0.5625"  
"17153"|"HumuLIN N 100 UNIT/ML Subcutaneous Suspension"|"66433"|"Pregnancy Complicated By Diabetes  
Mellitus"|"4"|"0.8"  
"17153"|"HumuLIN N 100 UNIT/ML Subcutaneous Suspension"|"69380"|"Diabetes Mellitus"|"21"|"0.456522"  
"17153"|"HumuLIN N 100 UNIT/ML Subcutaneous Suspension"|"69381"|"Type II Diabetes Mellitus"|"4"|"0.181818"  
"17153"|"HumuLIN N 100 UNIT/ML Subcutaneous Suspension"|"69382"|"Type II Diabetes Mellitus - Uncomplicated,  
Uncontrolled"|"2"|"0.285714"  
"17153"|"HumuLIN N 100 UNIT/ML Subcutaneous Suspension"|"69387"|"Type I Diabetes Mellitus"|"5"|"0.416667"  
"17153"|"HumuLIN N 100 UNIT/ML Subcutaneous Suspension"|"69395"|"Gestational Diabetes Mellitus"|"3"|"0.75"  
"17153"|"HumuLIN N 100 UNIT/ML Subcutaneous Suspension"|"69401"|"Diabetes Mellitus Under Control"|"2"|"0.5"  
"17153"|"HumuLIN N 100 UNIT/ML Subcutaneous Suspension"|"69402"|"Diabetes Mellitus Poorly  
Controlled"|"6"|"0.285714"  
"17154"|"HumuLIN R 100 UNIT/ML Injection Solution"|"66433"|"Pregnancy Complicated By Diabetes  
Mellitus"|"4"|"0.666667"  
"17154"|"HumuLIN R 100 UNIT/ML Injection Solution"|"69380"|"Diabetes Mellitus"|"15"|"0.441176"  
"17154"|"HumuLIN R 100 UNIT/ML Injection Solution"|"69381"|"Type II Diabetes Mellitus"|"4"|"0.4"  
"17154"|"HumuLIN R 100 UNIT/ML Injection Solution"|"69402"|"Diabetes Mellitus Poorly Controlled"|"6"|"0.3"  
"17166"|"HydrALAZINE HCl 10 MG Oral Tablet"|"63217"|"Congestive Heart Failure"|"4"|"0.444444"  
"17166"|"HydrALAZINE HCl 10 MG Oral Tablet"|"63467"|"Hypertension"|"10"|"0.37037"  
"17166"|"HydrALAZINE HCl 10 MG Oral Tablet"|"63468"|"Essential Hypertension"|"4"|"0.333333"  
"17166"|"HydrALAZINE HCl 10 MG Oral Tablet"|"63470"|"Benign Essential Hypertension"|"4"|"0.25"  
"17175"|"Hydrochlorothiazide 25 MG Oral Tablet"|"63467"|"Hypertension"|"548"|"0.4514"  
"17175"|"Hydrochlorothiazide 25 MG Oral Tablet"|"63468"|"Essential Hypertension"|"308"|"0.562044"  
"17175"|"Hydrochlorothiazide 25 MG Oral Tablet"|"63470"|"Benign Essential Hypertension"|"337"|"0.59646"  
"17175"|"Hydrochlorothiazide 25 MG Oral Tablet"|"63471"|"Accelerated Essential Hypertension"|"6"|"0.333333"  
"17175"|"Hydrochlorothiazide 25 MG Oral Tablet"|"63919"|"Lymphedema"|"2"|"0.2"  
"17175"|"Hydrochlorothiazide 25 MG Oral Tablet"|"65662"|"Nephrolithiasis"|"4"|"0.133333"

"17175""Hydrochlorothiazide 25 MG Oral Tablet""155099""(Lower) Leg Localized Swelling""4""0.129032"  
"17175""Hydrochlorothiazide 25 MG Oral Tablet""155856""Ankle Swelling (On Exam)""2""0.25"  
"17175""Hydrochlorothiazide 25 MG Oral Tablet""157287""Feet Swelling""2""0.5"  
"17175""Hydrochlorothiazide 25 MG Oral Tablet""250579""Blood Pressure Isolated Elevated""19""0.228916"  
"17175""Hydrochlorothiazide 25 MG Oral Tablet""257959""Hypercalciuria""3""0.6"  
"17175""Hydrochlorothiazide 25 MG Oral Tablet""270712""ACP Staging Stage 1 Hypertension: 140-159 / 90-99""6""0.333333"  
"17175""Hydrochlorothiazide 25 MG Oral Tablet""282327""Prehypertension""3""0.2"  
"17175""Hydrochlorothiazide 25 MG Oral Tablet""282680""Edema""8""0.156863"  
"17176""Hydrocodone-Homatropine 5-1.5 MG/5ML Oral Syrup""64119""Influenza""2""1"  
"17177""Hydrocortisone 1 % External Cream""69710""Contact Dermatitis""35""0.364583"  
"17177""Hydrocortisone 1 % External Cream""69753""Eczematoid Dermatitis""12""0.461538"  
"17177""Hydrocortisone 1 % External Cream""69816""Miliaria""11""0.423077"  
"17177""Hydrocortisone 1 % External Cream""69841""Nummular Eczematous Dermatitis""2""0.666667"  
"17177""Hydrocortisone 1 % External Cream""69884""Pityriasis Alba""7""0.636364"  
"17177""Hydrocortisone 1 % External Cream""69885""Pityriasis Rosea""2""0.4"  
"17177""Hydrocortisone 1 % External Cream""70112""Atopic Dermatitis""66""0.464789"  
"17177""Hydrocortisone 1 % External Cream""70135""Seborrheic Dermatitis""8""0.228571"  
"17177""Hydrocortisone 1 % External Cream""70472""Systemic Lupus Erythematosus""2""0.333333"  
"17177""Hydrocortisone 1 % External Cream""77704""Scabies""2""0.222222"  
"17177""Hydrocortisone 1 % External Cream""81335""Multiple Nonvenomous Insect Bites""4""0.363636"  
"17177""Hydrocortisone 1 % External Cream""83137""Nonvenomous Insect Bite""3""0.272727"  
"17177""Hydrocortisone 1 % External Cream""88375""Skin: A Rash""10""0.666667"  
"17177""Hydrocortisone 1 % External Cream""93705""Dermatitis""17""0.404762"  
"17177""Hydrocortisone 1 % External Cream""93736""Allergy To Insect Bites / Stings""2""0.666667"  
"17177""Hydrocortisone 1 % External Cream""278350""Eczema""103""0.536458"  
"17178""Hydrocortisone 2.5 % External Cream""61029""Itching (Pruritus)""2""0.5"  
"17178""Hydrocortisone 2.5 % External Cream""69710""Contact Dermatitis""5""0.555556"  
"17178""Hydrocortisone 2.5 % External Cream""69753""Eczematoid Dermatitis""3""0.75"  
"17178""Hydrocortisone 2.5 % External Cream""70027""Folliculitis""2""0.285714"  
"17178""Hydrocortisone 2.5 % External Cream""70112""Atopic Dermatitis""19""0.678571"  
"17178""Hydrocortisone 2.5 % External Cream""70135""Seborrheic Dermatitis""3""0.428571"  
"17178""Hydrocortisone 2.5 % External Cream""70136""Seborrheic Dermatitis Of The Scalp""2""0.5"  
"17178""Hydrocortisone 2.5 % External Cream""70137""Infantile Seborrheic Dermatitis""2""0.666667"  
"17178""Hydrocortisone 2.5 % External Cream""77704""Scabies""2""0.5"  
"17178""Hydrocortisone 2.5 % External Cream""88375""Skin: A Rash""4""0.8"  
"17178""Hydrocortisone 2.5 % External Cream""93705""Dermatitis""9""0.5"  
"17178""Hydrocortisone 2.5 % External Cream""278350""Eczema""18""0.545455"  
"17179""Hydrocortisone 1 % External Lotion""69710""Contact Dermatitis""3""0.75"  
"17179""Hydrocortisone 1 % External Lotion""69884""Pityriasis Alba""2""1"  
"17179""Hydrocortisone 1 % External Lotion""70112""Atopic Dermatitis""2""0.666667"  
"17179""Hydrocortisone 1 % External Lotion""93705""Dermatitis""3""0.75"  
"17180""Hydrocortisone 2.5 % External Lotion""88375""Skin: A Rash""2""0.666667"  
"17180""Hydrocortisone 2.5 % External Lotion""278350""Eczema""6""0.857143"  
"17181""Hydrocortisone 1 % External Ointment""62598""Allergic Rhinitis""6""0.105263"  
"17181""Hydrocortisone 1 % External Ointment""69710""Contact Dermatitis""21""0.428571"  
"17181""Hydrocortisone 1 % External Ointment""69753""Eczematoid Dermatitis""4""0.444444"  
"17181""Hydrocortisone 1 % External Ointment""69841""Nummular Eczematous Dermatitis""2""0.4"  
"17181""Hydrocortisone 1 % External Ointment""70112""Atopic Dermatitis""24""0.375"  
"17181""Hydrocortisone 1 % External Ointment""88375""Skin: A Rash""5""0.625"  
"17181""Hydrocortisone 1 % External Ointment""93705""Dermatitis""8""0.363636"  
"17181""Hydrocortisone 1 % External Ointment""278350""Eczema""95""0.708955"  
"17182""Hydrocortisone 2.5 % External Ointment""69710""Contact Dermatitis""3""0.375"  
"17182""Hydrocortisone 2.5 % External Ointment""70112""Atopic Dermatitis""7""0.368421"

"17182"|"Hydrocortisone 2.5 % External Ointment"|"278350"|"Eczema"|"23"|"0.71875"  
"17193"|"Preparation H 0.25-3-14-71.9 % Rectal Ointment"|"65128"|"Hemorrhoids"|"3"|"1"  
"17208"|"Probenecid 500 MG Oral Tablet"|"70384"|"Gout"|"5"|"0.833333"  
"17218"|"Prochlorperazine Maleate 10 MG Oral Tablet"|"60894"|"Nausea (Symptom)"|"2"|"0.5"  
"17218"|"Prochlorperazine Maleate 10 MG Oral Tablet"|"80524"|"Adenocarcinoma Of The Breast"|"2"|"1"  
"17218"|"Prochlorperazine Maleate 10 MG Oral Tablet"|"87702"|"Nausea With Vomiting"|"2"|"0.5"  
"17218"|"Prochlorperazine Maleate 10 MG Oral Tablet"|"167197"|"Lump Or Mass In Breast"|"2"|"1"  
"17218"|"Prochlorperazine Maleate 10 MG Oral Tablet"|"179542"|"Malignant Breast Neoplasm"|"2"|"1"  
"17218"|"Prochlorperazine Maleate 10 MG Oral Tablet"|"278808"|"Breast Cancer"|"9"|"0.529412"  
"17219"|"Procrit 10000 UNIT/ML Injection Solution"|"77962"|"Anemia"|"3"|"0.428571"  
"17219"|"Procrit 10000 UNIT/ML Injection Solution"|"77983"|"Anemia Of Chronic Disease"|"2"|"0.5"  
"17219"|"Procrit 10000 UNIT/ML Injection Solution"|"278753"|"Anemia Of Chronic Kidney Disease"|"3"|"0.375"  
"17229"|"Proglycem 50 MG/ML Oral Suspension"|"69456"|"Hypoglycemia"|"3"|"1"  
"17239"|"Promethazine HCl 25 MG/ML Injection Solution"|"60894"|"Nausea (Symptom)"|"2"|"0.666667"  
"17239"|"Promethazine HCl 25 MG/ML Injection Solution"|"74533"|"Migraine Headache"|"2"|"0.5"  
"17241"|"Promethazine HCl 25 MG Oral Tablet"|"60894"|"Nausea (Symptom)"|"51"|"0.614458"  
"17241"|"Promethazine HCl 25 MG Oral Tablet"|"60895"|"Vomiting (Symptom)"|"3"|"0.6"  
"17241"|"Promethazine HCl 25 MG Oral Tablet"|"60899"|"Abdominal Pain"|"4"|"0.1"  
"17241"|"Promethazine HCl 25 MG Oral Tablet"|"64579"|"Gastroenteritis"|"13"|"0.52"  
"17241"|"Promethazine HCl 25 MG Oral Tablet"|"64610"|"Viral Gastroenteritis"|"5"|"0.5"  
"17241"|"Promethazine HCl 25 MG Oral Tablet"|"64748"|"Gastroparesis"|"2"|"0.333333"  
"17241"|"Promethazine HCl 25 MG Oral Tablet"|"65354"|"Chronic Pancreatitis"|"3"|"0.75"  
"17241"|"Promethazine HCl 25 MG Oral Tablet"|"66133"|"Dysmenorrhea"|"3"|"0.375"  
"17241"|"Promethazine HCl 25 MG Oral Tablet"|"66274"|"Female Infertility"|"4"|"0.571429"  
"17241"|"Promethazine HCl 25 MG Oral Tablet"|"66394"|"Hyperemesis Gravidarum"|"2"|"1"  
"17241"|"Promethazine HCl 25 MG Oral Tablet"|"69402"|"Diabetes Mellitus Poorly Controlled"|"3"|"0.15"  
"17241"|"Promethazine HCl 25 MG Oral Tablet"|"73488"|"Acute Medial Meniscus Tear"|"2"|"0.666667"  
"17241"|"Promethazine HCl 25 MG Oral Tablet"|"74533"|"Migraine Headache"|"10"|"0.151515"  
"17241"|"Promethazine HCl 25 MG Oral Tablet"|"74534"|"Classic Migraine (With Aura)"|"4"|"0.333333"  
"17241"|"Promethazine HCl 25 MG Oral Tablet"|"74535"|"Classic Migraine (With Aura) With Intractable Migraine"|"2"|"1"  
"17241"|"Promethazine HCl 25 MG Oral Tablet"|"74537"|"Common Migraine (Without Aura)"|"3"|"0.230769"  
"17241"|"Promethazine HCl 25 MG Oral Tablet"|"74538"|"Common Migraine (Without Aura) With Intractable Migraine"|"4"|"0.666667"  
"17241"|"Promethazine HCl 25 MG Oral Tablet"|"76702"|"Viral Infection"|"2"|"0.666667"  
"17241"|"Promethazine HCl 25 MG Oral Tablet"|"80664"|"Leiomyoma Of The Uterus"|"2"|"0.25"  
"17241"|"Promethazine HCl 25 MG Oral Tablet"|"80847"|"Renal Cell Carcinoma"|"3"|"0.5"  
"17241"|"Promethazine HCl 25 MG Oral Tablet"|"87702"|"Nausea With Vomiting"|"65"|"0.844156"  
"17241"|"Promethazine HCl 25 MG Oral Tablet"|"166843"|"Nephrolithiasis Of The Right Kidney"|"2"|"1"  
"17241"|"Promethazine HCl 25 MG Oral Tablet"|"260217"|"Esophageal Cancer"|"2"|"0.4"  
"17241"|"Promethazine HCl 25 MG Oral Tablet"|"274406"|"Pregnancy Test Positive"|"3"|"0.375"  
"17241"|"Promethazine HCl 25 MG Oral Tablet"|"278812"|"Prostate Cancer"|"10"|"0.588235"  
"17241"|"Promethazine HCl 25 MG Oral Tablet"|"282704"|"Acute Gastritis"|"3"|"0.375"  
"17244"|"Promethazine VC/Codeine 6.25-5-10 MG/5ML Oral Syrup"|"60869"|"Cough"|"2"|"0.666667"  
"17253"|"Propranolol HCl 20 MG/5ML Oral Solution"|"63467"|"Hypertension"|"3"|"0.428571"  
"17255"|"Propranolol HCl 10 MG Oral Tablet"|"61118"|"Anxiety (Symptom)"|"6"|"0.428571"  
"17255"|"Propranolol HCl 10 MG Oral Tablet"|"63470"|"Benign Essential Hypertension"|"5"|"0.294118"  
"17255"|"Propranolol HCl 10 MG Oral Tablet"|"64701"|"Esophageal Varices"|"2"|"0.285714"  
"17255"|"Propranolol HCl 10 MG Oral Tablet"|"65286"|"Cirrhosis"|"4"|"0.25"  
"17255"|"Propranolol HCl 10 MG Oral Tablet"|"65299"|"Portal Hypertension"|"2"|"0.4"  
"17255"|"Propranolol HCl 10 MG Oral Tablet"|"69231"|"Hyperthyroidism"|"4"|"0.190476"  
"17255"|"Propranolol HCl 10 MG Oral Tablet"|"69234"|"Graves' Disease"|"5"|"0.625"  
"17255"|"Propranolol HCl 10 MG Oral Tablet"|"74537"|"Common Migraine (Without Aura)"|"2"|"0.333333"  
"17255"|"Propranolol HCl 10 MG Oral Tablet"|"75104"|"Familial (Benign Essential) Tremor"|"9"|"0.9"

"17255"|"Propranolol HCl 10 MG Oral Tablet"|"76232"|"Paranoid Schizophrenia"|"2"|"1"  
"17255"|"Propranolol HCl 10 MG Oral Tablet"|"76536"|"Generalized Anxiety Disorder"|"2"|"1"  
"17255"|"Propranolol HCl 10 MG Oral Tablet"|"165548"|"Tremor"|"2"|"0.666667"  
"17255"|"Propranolol HCl 10 MG Oral Tablet"|"282270"|"Palpitations"|"5"|"0.555556"  
"17258"|"Propylthiouracil 50 MG Oral Tablet"|"69231"|"Hyperthyroidism"|"6"|"0.375"  
"17258"|"Propylthiouracil 50 MG Oral Tablet"|"69234"|"Graves' Disease"|"7"|"0.5"  
"17290"|"HydrOXYzine HCl 50 MG Oral Tablet"|"61029"|"Itching (Pruritus)"|"4"|"0.8"  
"17290"|"HydrOXYzine HCl 50 MG Oral Tablet"|"76363"|"Major Depression, Recurrent With Psychotic Features"|"2"|"1"  
"17290"|"HydrOXYzine HCl 50 MG Oral Tablet"|"88375"|"Skin: A Rash"|"3"|"0.5"  
"17319"|"Ibuprofen 200 MG Oral Tablet"|"60828"|"Headache"|"3"|"0.5"  
"17319"|"Ibuprofen 200 MG Oral Tablet"|"66133"|"Dysmenorrhea"|"2"|"0.666667"  
"17319"|"Ibuprofen 200 MG Oral Tablet"|"73666"|"Backache"|"2"|"0.666667"  
"17319"|"Ibuprofen 200 MG Oral Tablet"|"77891"|"Acute Upper Respiratory Infection"|"2"|"0.222222"  
"17320"|"Ibuprofen 400 MG Oral Tablet"|"31947"|"Lumbago"|"3"|"0.375"  
"17320"|"Ibuprofen 400 MG Oral Tablet"|"66133"|"Dysmenorrhea"|"3"|"0.375"  
"17320"|"Ibuprofen 400 MG Oral Tablet"|"70549"|"Costochondritis (Tietze's Syndrome)"|"3"|"0.25"  
"17320"|"Ibuprofen 400 MG Oral Tablet"|"73405"|"Shoulder Sprain"|"3"|"1"  
"17320"|"Ibuprofen 400 MG Oral Tablet"|"73564"|"Lateral Epicondylitis"|"2"|"0.666667"  
"17320"|"Ibuprofen 400 MG Oral Tablet"|"74529"|"Headache Syndromes"|"3"|"0.3"  
"17320"|"Ibuprofen 400 MG Oral Tablet"|"75812"|"Myalgia And Myositis"|"2"|"0.333333"  
"17320"|"Ibuprofen 400 MG Oral Tablet"|"85623"|"Joint Pain, Localized In The Knee"|"3"|"0.214286"  
"17320"|"Ibuprofen 400 MG Oral Tablet"|"85638"|"Ankle Joint Pain"|"3"|"0.333333"  
"17320"|"Ibuprofen 400 MG Oral Tablet"|"85686"|"Pain In The Arms"|"3"|"0.6"  
"17320"|"Ibuprofen 400 MG Oral Tablet"|"90945"|"Joint Pain, Localized In The Right Shoulder"|"2"|"0.5"  
"17320"|"Ibuprofen 400 MG Oral Tablet"|"91089"|"Lower Back Pain"|"8"|"0.421053"  
"17320"|"Ibuprofen 400 MG Oral Tablet"|"288921"|"Chronic Pain"|"2"|"0.666667"  
"17335"|"Pyrazinamide 500 MG Oral Tablet"|"77275"|"Tuberculosis"|"2"|"0.4"  
"17366"|"Ranitidine HCl 75 MG/5ML Oral Syrup"|"60899"|"Abdominal Pain"|"4"|"1"  
"17366"|"Ranitidine HCl 75 MG/5ML Oral Syrup"|"64688"|"Esophageal Reflux"|"4"|"0.5"  
"17383"|"Imuran 50 MG Oral Tablet"|"70472"|"Systemic Lupus Erythematosus"|"2"|"0.666667"  
"17393"|"Indomethacin 50 MG Oral Capsule"|"70384"|"Gout"|"19"|"0.655172"  
"17393"|"Indomethacin 50 MG Oral Capsule"|"70387"|"Chronic Gout"|"6"|"0.666667"  
"17393"|"Indomethacin 50 MG Oral Capsule"|"70706"|"Ankylosing Spondylitis"|"2"|"0.666667"  
"17393"|"Indomethacin 50 MG Oral Capsule"|"257996"|"Arthritis"|"3"|"0.272727"  
"17463"|"Isosorbide Dinitrate 10 MG Oral Tablet"|"62975"|"Coronary Artery Disease"|"4"|"0.5"  
"17464"|"Isosorbide Dinitrate 20 MG Oral Tablet"|"62975"|"Coronary Artery Disease"|"4"|"0.363636"  
"17464"|"Isosorbide Dinitrate 20 MG Oral Tablet"|"63470"|"Benign Essential Hypertension"|"2"|"0.4"  
"17465"|"Isosorbide Dinitrate 30 MG Oral Tablet"|"62975"|"Coronary Artery Disease"|"7"|"0.25"  
"17465"|"Isosorbide Dinitrate 30 MG Oral Tablet"|"63467"|"Hypertension"|"5"|"0.15625"  
"17517"|"Kenalog 40 MG/ML Injection Suspension"|"278350"|"Eczema"|"3"|"0.375"  
"17535"|"Klor-Con 20 MEQ Oral Packet"|"63467"|"Hypertension"|"4"|"0.137931"  
"17535"|"Klor-Con 20 MEQ Oral Packet"|"63470"|"Benign Essential Hypertension"|"2"|"0.285714"  
"17535"|"Klor-Con 20 MEQ Oral Packet"|"68089"|"Hypokalemia"|"2"|"1"  
"17560"|"Reglan 5 MG Oral Tablet"|"70475"|"Scleroderma"|"3"|"0.6"  
"17737"|"Sebulex 2-2 % External Shampoo"|"70116"|"Tinea Capitis"|"6"|"1"  
"17781"|"Silver Sulfadiazine 1 % External Cream"|"69660"|"Chronic Cutaneous Ulcer"|"3"|"0.75"  
"17781"|"Silver Sulfadiazine 1 % External Cream"|"81584"|"Burns"|"13"|"0.928571"  
"17781"|"Silver Sulfadiazine 1 % External Cream"|"81684"|"Multiple Partial Thickness (Second Degree) Burns Of The Face, Head, And Neck"|"2"|"0.666667"  
"17781"|"Silver Sulfadiazine 1 % External Cream"|"81810"|"Full Thickness (Third Degree) Burns Of Multiple Sites Of Wrists And Hands"|"2"|"1"  
"17781"|"Silver Sulfadiazine 1 % External Cream"|"81869"|"Partial Thickness (Second Degree) Burns Of Multiple Sites Of The Lower Limbs"|"2"|"1"

"17781"|"Silver Sulfadiazine 1 % External Cream"|"284497"|"Partial Thickness (2nd Degree) Burns Of The Right Chest Wall"|"2"|"0.666667"

"17783"|"Simethicone 80 MG Oral Tablet Chewable"|"60899"|"Abdominal Pain"|"5"|"0.5"

"17783"|"Simethicone 80 MG Oral Tablet Chewable"|"64688"|"Esophageal Reflux"|"3"|"0.5"

"17783"|"Simethicone 80 MG Oral Tablet Chewable"|"166777"|"Constipation"|"2"|"0.285714"

"17783"|"Simethicone 80 MG Oral Tablet Chewable"|"282714"|"Bloating"|"2"|"0.5"

"17784"|"Simethicone 40 MG/0.6ML Oral Suspension"|"115885"|"Abdominal Distention"|"2"|"1"

"17833"|"Levothroid 25 MCG Oral Tablet"|"69258"|"Hypothyroidism"|"9"|"0.642857"

"17834"|"Levothroid 112 MCG Oral Tablet"|"69258"|"Hypothyroidism"|"9"|"0.6"

"17835"|"Levothroid 125 MCG Oral Tablet"|"69258"|"Hypothyroidism"|"6"|"0.461538"

"17835"|"Levothroid 125 MCG Oral Tablet"|"69266"|"Congenital Hypothyroidism"|"2"|"1"

"17836"|"Levothroid 175 MCG Oral Tablet"|"69258"|"Hypothyroidism"|"2"|"0.4"

"17839"|"Levothyroxine Sodium 25 MCG Oral Tablet"|"69258"|"Hypothyroidism"|"104"|"0.626506"

"17839"|"Levothyroxine Sodium 25 MCG Oral Tablet"|"69259"|"Primary Hypothyroidism"|"3"|"0.5"

"17839"|"Levothyroxine Sodium 25 MCG Oral Tablet"|"69266"|"Congenital Hypothyroidism"|"12"|"0.545455"

"17839"|"Levothyroxine Sodium 25 MCG Oral Tablet"|"69283"|"Hashimoto's Thyroiditis"|"2"|"0.666667"

"17839"|"Levothyroxine Sodium 25 MCG Oral Tablet"|"76361"|"Moderate Recurrent Major Depression"|"2"|"0.5"

"17839"|"Levothyroxine Sodium 25 MCG Oral Tablet"|"168206"|"Subclinical Hypothyroidism"|"3"|"0.5"

"17839"|"Levothyroxine Sodium 25 MCG Oral Tablet"|"247286"|"Thyroid Function Tests Nonspecific Abnormal Findings"|"6"|"1"

"17840"|"Levothyroxine Sodium 125 MCG Oral Tablet"|"69214"|"Hypopituitarism"|"6"|"0.666667"

"17840"|"Levothyroxine Sodium 125 MCG Oral Tablet"|"69231"|"Hyperthyroidism"|"4"|"0.16"

"17840"|"Levothyroxine Sodium 125 MCG Oral Tablet"|"69234"|"Graves' Disease"|"3"|"0.166667"

"17840"|"Levothyroxine Sodium 125 MCG Oral Tablet"|"69258"|"Hypothyroidism"|"183"|"0.720472"

"17840"|"Levothyroxine Sodium 125 MCG Oral Tablet"|"69259"|"Primary Hypothyroidism"|"2"|"0.666667"

"17840"|"Levothyroxine Sodium 125 MCG Oral Tablet"|"69260"|"Hypothyroidism Postablative"|"6"|"0.75"

"17840"|"Levothyroxine Sodium 125 MCG Oral Tablet"|"69261"|"Postsurgical Primary Hypothyroidism"|"6"|"0.666667"

"17840"|"Levothyroxine Sodium 125 MCG Oral Tablet"|"69262"|"Post Radio-iodine Therapy Hypothyroidism"|"3"|"0.6"

"17840"|"Levothyroxine Sodium 125 MCG Oral Tablet"|"69266"|"Congenital Hypothyroidism"|"17"|"0.944444"

"17840"|"Levothyroxine Sodium 125 MCG Oral Tablet"|"69283"|"Hashimoto's Thyroiditis"|"2"|"0.4"

"17840"|"Levothyroxine Sodium 125 MCG Oral Tablet"|"69314"|"Papillary Carcinoma Of The Thyroid Gland"|"3"|"0.428571"

"17840"|"Levothyroxine Sodium 125 MCG Oral Tablet"|"258928"|"Thyroid Cancer"|"2"|"0.333333"

"17855"|"Lidocaine HCl 4 % External Solution"|"60828"|"Headache"|"3"|"0.75"

"17855"|"Lidocaine HCl 4 % External Solution"|"62614"|"Deviated Nasal Septum (Acquired)"|"2"|"0.333333"

"17862"|"Lidocaine Viscous 2 % Mouth/Throat Solution"|"62760"|"Acute Pharyngitis"|"5"|"0.833333"

"17862"|"Lidocaine Viscous 2 % Mouth/Throat Solution"|"62766"|"Acute Viral Pharyngitis"|"2"|"0.666667"

"17877"|"Lithium Carbonate 150 MG Oral Capsule"|"76307"|"Bipolar Disorder"|"3"|"0.5"

"17877"|"Lithium Carbonate 150 MG Oral Capsule"|"275553"|"Bipolar I Disorder, Most Recent Episode"|"2"|"1"

"17895"|"Loperamide HCl 2 MG Oral Capsule"|"60902"|"Diarrhea (Symptom)"|"4"|"0.5"

"17895"|"Loperamide HCl 2 MG Oral Capsule"|"64579"|"Gastroenteritis"|"2"|"0.5"

"17896"|"Loperamide HCl 1 MG/5ML Oral Liquid"|"64978"|"Short Bowel Syndrome"|"2"|"1"

"17898"|"Loperamide HCl 2 MG Oral Tablet"|"60902"|"Diarrhea (Symptom)"|"4"|"0.8"

"17898"|"Loperamide HCl 2 MG Oral Tablet"|"65076"|"Irritable Bowel Syndrome"|"2"|"0.666667"

"17904"|"LORazepam 0.5 MG Oral Tablet"|"61048"|"Memory Lapses Or Loss"|"4"|"0.2"

"17904"|"LORazepam 0.5 MG Oral Tablet"|"61108"|"Insomnia"|"11"|"0.234043"

"17904"|"LORazepam 0.5 MG Oral Tablet"|"61118"|"Anxiety (Symptom)"|"38"|"0.633333"

"17904"|"LORazepam 0.5 MG Oral Tablet"|"65076"|"Irritable Bowel Syndrome"|"2"|"0.25"

"17904"|"LORazepam 0.5 MG Oral Tablet"|"75001"|"Partial Complex Psychomotor Seizure"|"2"|"0.666667"

"17904"|"LORazepam 0.5 MG Oral Tablet"|"75080"|"Parkinson's Disease"|"3"|"0.375"

"17904"|"LORazepam 0.5 MG Oral Tablet"|"76272"|"Schizoaffective Disorder"|"2"|"0.5"

"17904"|"LORazepam 0.5 MG Oral Tablet"|"76307"|"Bipolar Disorder"|"2"|"0.25"

"17904"|"LORazepam 0.5 MG Oral Tablet"|"76348"|"Bipolar II Disorder"|"2"|"1"  
"17904"|"LORazepam 0.5 MG Oral Tablet"|"76352"|"Major Depression, Single Episode"|"2"|"0.666667"  
"17904"|"LORazepam 0.5 MG Oral Tablet"|"76357"|"Major Depression, Recurrent"|"5"|"0.5"  
"17904"|"LORazepam 0.5 MG Oral Tablet"|"76536"|"Generalized Anxiety Disorder"|"7"|"0.538462"  
"17904"|"LORazepam 0.5 MG Oral Tablet"|"76538"|"Panic Disorder With Agoraphobia"|"3"|"0.6"  
"17904"|"LORazepam 0.5 MG Oral Tablet"|"76587"|"Anxiety Disorder NOS"|"11"|"0.611111"  
"17904"|"LORazepam 0.5 MG Oral Tablet"|"76680"|"Adjustment Disorder With Anxiety"|"2"|"0.5"  
"17904"|"LORazepam 0.5 MG Oral Tablet"|"166550"|"Vocal Cord Disorder"|"2"|"1"  
"17904"|"LORazepam 0.5 MG Oral Tablet"|"251600"|"Dementia"|"3"|"0.157895"  
"17904"|"LORazepam 0.5 MG Oral Tablet"|"275592"|"Post-traumatic Stress Disorder"|"2"|"0.333333"  
"17905"|"LORazepam 1 MG Oral Tablet"|"60828"|"Headache"|"3"|"0.125"  
"17905"|"LORazepam 1 MG Oral Tablet"|"61108"|"Insomnia"|"5"|"0.147059"  
"17905"|"LORazepam 1 MG Oral Tablet"|"61118"|"Anxiety (Symptom)"|"22"|"0.611111"  
"17905"|"LORazepam 1 MG Oral Tablet"|"63484"|"Pulmonary Hypertension"|"2"|"0.4"  
"17905"|"LORazepam 1 MG Oral Tablet"|"64205"|"Chronic Obstructive Pulmonary Disease"|"2"|"0.2"  
"17905"|"LORazepam 1 MG Oral Tablet"|"70455"|"Rheumatoid Arthritis"|"2"|"1"  
"17905"|"LORazepam 1 MG Oral Tablet"|"74990"|"Convulsive Grand Mal Seizure With Intractable Seizure"|"2"|"0.5"  
"17905"|"LORazepam 1 MG Oral Tablet"|"75002"|"Partial Complex Psychomotor Seizure With Intractable Seizure"|"6"|"0.545455"  
"17905"|"LORazepam 1 MG Oral Tablet"|"75125"|"Multiple Sclerosis"|"5"|"0.416667"  
"17905"|"LORazepam 1 MG Oral Tablet"|"75358"|"Cerebral Vasculitis"|"2"|"0.666667"  
"17905"|"LORazepam 1 MG Oral Tablet"|"75931"|"Anxiety Disorder Due To General Medical Condition"|"2"|"0.666667"  
"17905"|"LORazepam 1 MG Oral Tablet"|"76357"|"Major Depression, Recurrent"|"2"|"0.333333"  
"17905"|"LORazepam 1 MG Oral Tablet"|"76536"|"Generalized Anxiety Disorder"|"2"|"0.333333"  
"17905"|"LORazepam 1 MG Oral Tablet"|"76537"|"Panic Disorder Without Agoraphobia"|"3"|"1"  
"17905"|"LORazepam 1 MG Oral Tablet"|"76543"|"Claustrophobia"|"2"|"0.666667"  
"17905"|"LORazepam 1 MG Oral Tablet"|"76587"|"Anxiety Disorder NOS"|"4"|"0.4"  
"17905"|"LORazepam 1 MG Oral Tablet"|"115846"|"Back Muscle Spasm"|"2"|"0.666667"  
"17905"|"LORazepam 1 MG Oral Tablet"|"173419"|"Cervical Radiculopathy"|"2"|"0.4"  
"17905"|"LORazepam 1 MG Oral Tablet"|"252550"|"Generalized Convulsive Tonic Seizure With Intractable Seizure"|"2"|"0.666667"  
"17905"|"LORazepam 1 MG Oral Tablet"|"252570"|"Partial Complex Seizure With Secondary Generalization With Intractable Seizure"|"4"|"0.571429"  
"17915"|"Sodium Bicarbonate 650 MG Oral Tablet"|"65655"|"Renal Tubular Acidosis"|"5"|"0.5"  
"17915"|"Sodium Bicarbonate 650 MG Oral Tablet"|"69535"|"Metabolic Acidosis"|"10"|"0.555556"  
"17915"|"Sodium Bicarbonate 650 MG Oral Tablet"|"274605"|"Chronic Kidney Disease, Stage 2"|"2"|"0.5"  
"17915"|"Sodium Bicarbonate 650 MG Oral Tablet"|"274606"|"Chronic Kidney Disease, Stage 3"|"9"|"0.346154"  
"17915"|"Sodium Bicarbonate 650 MG Oral Tablet"|"274640"|"Chronic Kidney Disease, Stage 5"|"2"|"0.333333"  
"17915"|"Sodium Bicarbonate 650 MG Oral Tablet"|"274671"|"Chronic Kidney Disease, Stage"|"2"|"0.666667"  
"17915"|"Sodium Bicarbonate 650 MG Oral Tablet"|"274672"|"Chronic Kidney Disease, Stage 4"|"8"|"0.421053"  
"17917"|"Sodium Chloride 2.5 MEQ/ML Injection Solution"|"69464"|"Congenital Adrenal Hyperplasia"|"2"|"0.5"  
"17917"|"Sodium Chloride 2.5 MEQ/ML Injection Solution"|"69465"|"21-hydroxylase Deficiency (Salt Losing)"|"2"|"0.666667"  
"17922"|"Sodium Chloride 3 % Inhalation Nebulization Solution"|"32925"|"Chronic Respiratory Failure"|"5"|"1"  
"17938"|"Sodium Polystyrene Sulfonate Oral Powder"|"68087"|"Hyperkalemia"|"7"|"0.388889"  
"17938"|"Sodium Polystyrene Sulfonate Oral Powder"|"274606"|"Chronic Kidney Disease, Stage 3"|"6"|"0.4"  
"17938"|"Sodium Polystyrene Sulfonate Oral Powder"|"274672"|"Chronic Kidney Disease, Stage 4"|"3"|"0.6"  
"17954"|"Solu-CORTEF 100 MG Injection Solution Reconstituted"|"69214"|"Hypopituitarism"|"7"|"0.777778"  
"17954"|"Solu-CORTEF 100 MG Injection Solution Reconstituted"|"69464"|"Congenital Adrenal Hyperplasia"|"14"|"0.875"  
"17963"|"Soma 350 MG Oral Tablet"|"288921"|"Chronic Pain"|"2"|"0.4"  
"18013"|"Lubriderm External Lotion"|"70112"|"Atopic Dermatitis"|"5"|"0.5"  
"18013"|"Lubriderm External Lotion"|"278350"|"Eczema"|"6"|"0.428571"

"18023"|"Lupron Depot-Ped 11.25 MG Intramuscular Kit"|"69556"|"Precocious Puberty"|"7"|"0.777778"  
"18023"|"Lupron Depot-Ped 11.25 MG Intramuscular Kit"|"69557"|"Idiopathic Precocious Puberty"|"2"|"1"  
"18024"|"Lupron Depot-Ped 15 MG Intramuscular Kit"|"69556"|"Precocious Puberty"|"10"|"1"  
"18024"|"Lupron Depot-Ped 15 MG Intramuscular Kit"|"69557"|"Idiopathic Precocious Puberty"|"2"|"1"  
"18025"|"Lupron Depot-Ped 7.5 MG Intramuscular Kit"|"69556"|"Precocious Puberty"|"2"|"1"  
"18053"|"Macrobid 100 MG Oral Capsule"|"60928"|"Pain During Urination (Dysuria)"|"2"|"0.4"  
"18053"|"Macrobid 100 MG Oral Capsule"|"65762"|"Urinary Tract Infection"|"35"|"0.795455"  
"18055"|"Macrochantin 25 MG Oral Capsule"|"65764"|"Urinary Tract Infection, Geriatric Presentation"|"3"|"0.75"  
"18065"|"Magnesium Citrate 1.745 GM/30ML Oral Solution"|"166777"|"Constipation"|"3"|"0.5"  
"18125"|"Meclizine HCl 25 MG Oral Tablet Chewable"|"252601"|"Vertigo"|"2"|"0.5"  
"18146"|"Spironolactone 25 MG Oral Tablet"|"63173"|"Cardiomyopathy"|"5"|"0.192308"  
"18146"|"Spironolactone 25 MG Oral Tablet"|"63174"|"Dilated Cardiomyopathy"|"6"|"0.25"  
"18146"|"Spironolactone 25 MG Oral Tablet"|"63175"|"Ischemic Cardiomyopathy"|"6"|"0.2"  
"18146"|"Spironolactone 25 MG Oral Tablet"|"63217"|"Congestive Heart Failure"|"60"|"0.428571"  
"18146"|"Spironolactone 25 MG Oral Tablet"|"63219"|"Left Heart Failure"|"2"|"0.4"  
"18146"|"Spironolactone 25 MG Oral Tablet"|"63224"|"Congestive Heart Failure With Systolic And Diastolic  
Dysfunction"|"3"|"0.333333"  
"18146"|"Spironolactone 25 MG Oral Tablet"|"63467"|"Hypertension"|"28"|"0.145078"  
"18146"|"Spironolactone 25 MG Oral Tablet"|"63468"|"Essential Hypertension"|"16"|"0.168421"  
"18146"|"Spironolactone 25 MG Oral Tablet"|"63470"|"Benign Essential Hypertension"|"7"|"0.102941"  
"18146"|"Spironolactone 25 MG Oral Tablet"|"65290"|"Cirrhosis Due To Hepatitis C"|"2"|"0.4"  
"18146"|"Spironolactone 25 MG Oral Tablet"|"65302"|"Ascites"|"2"|"0.285714"  
"18146"|"Spironolactone 25 MG Oral Tablet"|"69194"|"Endocrine Disorder"|"2"|"1"  
"18146"|"Spironolactone 25 MG Oral Tablet"|"69549"|"Polycystic Ovarian Syndrome"|"4"|"0.307692"  
"18146"|"Spironolactone 25 MG Oral Tablet"|"250862"|"Chronic Combined Systolic And Diastolic Congestive Heart  
Failure"|"2"|"0.222222"  
"18146"|"Spironolactone 25 MG Oral Tablet"|"250918"|"Chronic Systolic Congestive Heart Failure"|"4"|"0.210526"  
"18146"|"Spironolactone 25 MG Oral Tablet"|"251468"|"Limb Swelling"|"3"|"0.428571"  
"18146"|"Spironolactone 25 MG Oral Tablet"|"282680"|"Edema"|"4"|"0.173913"  
"18183"|"MedroxyPROGESTERone Acetate 10 MG Oral Tablet"|"60957"|"Menses Abnormal"|"2"|"1"  
"18183"|"MedroxyPROGESTERone Acetate 10 MG Oral Tablet"|"66015"|"Ovarian Disorders"|"2"|"0.4"  
"18183"|"MedroxyPROGESTERone Acetate 10 MG Oral Tablet"|"66016"|"Oligomenorrhea"|"13"|"0.722222"  
"18183"|"MedroxyPROGESTERone Acetate 10 MG Oral Tablet"|"66070"|"Menorrhagia"|"7"|"0.466667"  
"18183"|"MedroxyPROGESTERone Acetate 10 MG Oral Tablet"|"66076"|"Menopausal Disorder"|"2"|"1"  
"18183"|"MedroxyPROGESTERone Acetate 10 MG Oral Tablet"|"66139"|"Amenorrhea"|"19"|"0.826087"  
"18183"|"MedroxyPROGESTERone Acetate 10 MG Oral Tablet"|"66140"|"Primary Amenorrhea"|"2"|"1"  
"18183"|"MedroxyPROGESTERone Acetate 10 MG Oral Tablet"|"66141"|"Secondary Amenorrhea"|"7"|"0.583333"  
"18183"|"MedroxyPROGESTERone Acetate 10 MG Oral Tablet"|"66143"|"Metrorrhagia"|"4"|"0.571429"  
"18183"|"MedroxyPROGESTERone Acetate 10 MG Oral Tablet"|"69214"|"Hypopituitarism"|"2"|"1"  
"18183"|"MedroxyPROGESTERone Acetate 10 MG Oral Tablet"|"69402"|"Diabetes Mellitus Poorly  
Controlled"|"2"|"0.285714"  
"18183"|"MedroxyPROGESTERone Acetate 10 MG Oral Tablet"|"69546"|"Dysfunctional Uterine  
Bleeding"|"7"|"0.777778"  
"18183"|"MedroxyPROGESTERone Acetate 10 MG Oral Tablet"|"69549"|"Polycystic Ovarian Syndrome"|"54"|"0.75"  
"18183"|"MedroxyPROGESTERone Acetate 10 MG Oral Tablet"|"88042"|"Irregular Length Of Menstrual  
Periods"|"2"|"0.666667"  
"18183"|"MedroxyPROGESTERone Acetate 10 MG Oral Tablet"|"288609"|"Menometrorrhagia"|"4"|"0.363636"  
"18184"|"MedroxyPROGESTERone Acetate 5 MG Oral Tablet"|"80664"|"Leiomyoma Of The Uterus"|"2"|"1"  
"18213"|"Mephyton 5 MG Oral Tablet"|"67695"|"Cystic Fibrosis"|"3"|"0.75"  
"18221"|"Mestinon 180 MG Oral Tablet Extended Release"|"75733"|"Myasthenia Gravis"|"6"|"0.666667"  
"18240"|"Sulfamethoxazole-TMP DS 800-160 MG Oral Tablet"|"60928"|"Pain During Urination  
(Dysuria)"|"15"|"0.357143"  
"18240"|"Sulfamethoxazole-TMP DS 800-160 MG Oral Tablet"|"62577"|"Sinusitis"|"8"|"0.235294"  
"18240"|"Sulfamethoxazole-TMP DS 800-160 MG Oral Tablet"|"62578"|"Acute Sinusitis"|"23"|"0.319444"

"18240""Sulfamethoxazole-TMP DS 800-160 MG Oral Tablet""62580""Acute Maxillary Sinusitis""9""0.375"

"18240""Sulfamethoxazole-TMP DS 800-160 MG Oral Tablet""62582""Acute Ethmoidal Sinusitis""2""0.285714"

"18240""Sulfamethoxazole-TMP DS 800-160 MG Oral Tablet""62585""Chronic Sinusitis""4""0.222222"

"18240""Sulfamethoxazole-TMP DS 800-160 MG Oral Tablet""62586""Chronic Maxillary Sinusitis""10""0.175439"

"18240""Sulfamethoxazole-TMP DS 800-160 MG Oral Tablet""62587""Chronic Frontal Sinusitis""8""0.177778"

"18240""Sulfamethoxazole-TMP DS 800-160 MG Oral Tablet""62588""Chronic Ethmoidal Sinusitis""41""0.630769"

"18240""Sulfamethoxazole-TMP DS 800-160 MG Oral Tablet""62591""Nasal Polyps""4""0.173913"

"18240""Sulfamethoxazole-TMP DS 800-160 MG Oral Tablet""64118""Acute Bronchitis""5""0.113636"

"18240""Sulfamethoxazole-TMP DS 800-160 MG Oral Tablet""64524""Empyema""2""1"

"18240""Sulfamethoxazole-TMP DS 800-160 MG Oral Tablet""65752""Cystitis""12""0.387097"

"18240""Sulfamethoxazole-TMP DS 800-160 MG Oral Tablet""65753""Acute Cystitis""15""0.340909"

"18240""Sulfamethoxazole-TMP DS 800-160 MG Oral Tablet""65762""Urinary Tract Infection""155""0.698198"

"18240""Sulfamethoxazole-TMP DS 800-160 MG Oral Tablet""65770""Acute Urinary Retention""2""0.285714"

"18240""Sulfamethoxazole-TMP DS 800-160 MG Oral Tablet""65831""Prostatitis""2""0.2"

"18240""Sulfamethoxazole-TMP DS 800-160 MG Oral Tablet""65832""Acute Bacterial Prostatitis""2""1"

"18240""Sulfamethoxazole-TMP DS 800-160 MG Oral Tablet""66258""Vulvar Abscess""3""1"

"18240""Sulfamethoxazole-TMP DS 800-160 MG Oral Tablet""69447""Diabetic Foot Ulcer""2""0.285714"

"18240""Sulfamethoxazole-TMP DS 800-160 MG Oral Tablet""69785""Hidradenitis Suppurativa""3""0.272727"

"18240""Sulfamethoxazole-TMP DS 800-160 MG Oral Tablet""69834""Ingrowing Nail With Infection""2""0.666667"

"18240""Sulfamethoxazole-TMP DS 800-160 MG Oral Tablet""69920""Sebaceous Cyst""4""0.222222"

"18240""Sulfamethoxazole-TMP DS 800-160 MG Oral Tablet""69968""Carbuncle""17""0.653846"

"18240""Sulfamethoxazole-TMP DS 800-160 MG Oral Tablet""69970""Carbuncle On The Face""2""1"

"18240""Sulfamethoxazole-TMP DS 800-160 MG Oral Tablet""69986""Carbuncle In The Groin""3""0.6"

"18240""Sulfamethoxazole-TMP DS 800-160 MG Oral Tablet""69999""Cellulitis""35""0.492958"

"18240""Sulfamethoxazole-TMP DS 800-160 MG Oral Tablet""70000""Facial Cellulitis""2""0.5"

"18240""Sulfamethoxazole-TMP DS 800-160 MG Oral Tablet""70005""Cellulitis Of The Forearm""2""1"

"18240""Sulfamethoxazole-TMP DS 800-160 MG Oral Tablet""70006""Cellulitis Of The Arm""2""1"

"18240""Sulfamethoxazole-TMP DS 800-160 MG Oral Tablet""70010""Cellulitis Of The Trunk""3""1"

"18240""Sulfamethoxazole-TMP DS 800-160 MG Oral Tablet""70011""Cellulitis Of The Buttocks""2""0.5"

"18240""Sulfamethoxazole-TMP DS 800-160 MG Oral Tablet""70016""Cellulitis Of The Leg""13""0.8125"

"18240""Sulfamethoxazole-TMP DS 800-160 MG Oral Tablet""70017""Cellulitis Of The Ankle""4""1"

"18240""Sulfamethoxazole-TMP DS 800-160 MG Oral Tablet""70018""Cellulitis Of The Foot""3""0.6"

"18240""Sulfamethoxazole-TMP DS 800-160 MG Oral Tablet""70027""Folliculitis""20""0.487805"

"18240""Sulfamethoxazole-TMP DS 800-160 MG Oral Tablet""70029""Furuncle""12""0.545455"

"18240""Sulfamethoxazole-TMP DS 800-160 MG Oral Tablet""70031""Furuncle On The Face""3""0.75"

"18240""Sulfamethoxazole-TMP DS 800-160 MG Oral Tablet""70035""Furuncle In The Axilla""2""0.666667"

"18240""Sulfamethoxazole-TMP DS 800-160 MG Oral Tablet""70037""Furuncle On The Upper Arm""2""0.666667"

"18240""Sulfamethoxazole-TMP DS 800-160 MG Oral Tablet""70060""Impetigo""2""0.222222"

"18240""Sulfamethoxazole-TMP DS 800-160 MG Oral Tablet""70080""Skin Abscess""13""0.52"

"18240""Sulfamethoxazole-TMP DS 800-160 MG Oral Tablet""70081""Skin Abscess Of The Face""6""1"

"18240""Sulfamethoxazole-TMP DS 800-160 MG Oral Tablet""70088""Skin Abscess Of The Groin""3""0.75"

"18240""Sulfamethoxazole-TMP DS 800-160 MG Oral Tablet""70094""Skin Abscess Of The Buttocks""7""0.875"

"18240""Sulfamethoxazole-TMP DS 800-160 MG Oral Tablet""70475""Scleroderma""6""0.461538"

"18240""Sulfamethoxazole-TMP DS 800-160 MG Oral Tablet""70477""Scleroderma With Pulmonary Involvement""2""0.4"

"18240""Sulfamethoxazole-TMP DS 800-160 MG Oral Tablet""70598""Polymyositis / Dermatomyositis""3""1"

"18240""Sulfamethoxazole-TMP DS 800-160 MG Oral Tablet""70640""Wegener's Granulomatosis""9""0.9"

"18240""Sulfamethoxazole-TMP DS 800-160 MG Oral Tablet""74027""Osteomyelitis""5""0.416667"

"18240""Sulfamethoxazole-TMP DS 800-160 MG Oral Tablet""76835""HIV Infection""33""0.392857"

"18240""Sulfamethoxazole-TMP DS 800-160 MG Oral Tablet""76842""Acquired Immunodeficiency Syndrome

(AIDS)"|27|"0.509434"  
"18240|"Sulfamethoxazole-TMP DS 800-160 MG Oral Tablet|"81336|"Infected Nonvenomous Insect Bite|"2|"1"  
"18240|"Sulfamethoxazole-TMP DS 800-160 MG Oral Tablet|"82334|"Open Wound Of The Leg|"2|"0.666667"  
"18240|"Sulfamethoxazole-TMP DS 800-160 MG Oral Tablet|"83136|"Bite From A Venomous Spider|"3|"1"  
"18240|"Sulfamethoxazole-TMP DS 800-160 MG Oral Tablet|"124553|"Pustules|"2|"0.5"  
"18240|"Sulfamethoxazole-TMP DS 800-160 MG Oral Tablet|"167165|"Epididymitis Of The Left Testicle|"2|"1"  
"18240|"Sulfamethoxazole-TMP DS 800-160 MG Oral Tablet|"168612|"Cellulitis Of The Right  
Leg|"2|"0.333333"  
"18240|"Sulfamethoxazole-TMP DS 800-160 MG Oral Tablet|"168623|"Cellulitis Of The Left First  
Toe|"2|"0.666667"  
"18240|"Sulfamethoxazole-TMP DS 800-160 MG Oral Tablet|"251467|"Limb Pain|"6|"0.15"  
"18240|"Sulfamethoxazole-TMP DS 800-160 MG Oral Tablet|"251528|"Acute Otitis Media|"3|"0.2"  
"18240|"Sulfamethoxazole-TMP DS 800-160 MG Oral Tablet|"258023|"Infected Superficial Thigh Injury|"2|"1"  
"18240|"Sulfamethoxazole-TMP DS 800-160 MG Oral Tablet|"258835|"Bronchitis|"3|"0.115385"  
"18240|"Sulfamethoxazole-TMP DS 800-160 MG Oral Tablet|"278464|"Skin Abscess Of The Left Buttock|"2|"1"  
"18240|"Sulfamethoxazole-TMP DS 800-160 MG Oral Tablet|"278472|"Pustular Folliculitis|"4|"0.666667"  
"18240|"Sulfamethoxazole-TMP DS 800-160 MG Oral Tablet|"278552|"Furunculosis|"3|"0.5"  
"18240|"Sulfamethoxazole-TMP DS 800-160 MG Oral Tablet|"278637|"Skin Abscess Of The Right  
Leg|"2|"0.666667"  
"18240|"Sulfamethoxazole-TMP DS 800-160 MG Oral Tablet|"282676|"Lymphadenopathy|"2|"0.4"  
"18240|"Sulfamethoxazole-TMP DS 800-160 MG Oral Tablet|"283037|"Hematuria|"3|"0.25"  
"18240|"Sulfamethoxazole-TMP DS 800-160 MG Oral Tablet|"283233|"Abscess Of The Scrotum|"3|"0.75"  
"18240|"Sulfamethoxazole-TMP DS 800-160 MG Oral Tablet|"288990|"Perianal Abscess|"2|"0.5"  
"18240|"Sulfamethoxazole-TMP DS 800-160 MG Oral Tablet|"291776|"Vulvar Furuncle|"2|"1"  
"18240|"Sulfamethoxazole-TMP DS 800-160 MG Oral Tablet|"293641|"Methicillin Resistant Staphylococcus  
Aureus Infection|"2|"0.285714"  
"18293|"Synthroid 25 MCG Oral Tablet|"69258|"Hypothyroidism|"16|"0.326531"  
"18293|"Synthroid 25 MCG Oral Tablet|"69266|"Congenital Hypothyroidism|"2|"0.4"  
"18294|"Synthroid 75 MCG Oral Tablet|"69258|"Hypothyroidism|"63|"0.496063"  
"18294|"Synthroid 75 MCG Oral Tablet|"69266|"Congenital Hypothyroidism|"13|"0.684211"  
"18294|"Synthroid 75 MCG Oral Tablet|"69283|"Hashimoto's Thyroiditis|"2|"0.5"  
"18329|"TEGretol 200 MG Oral Tablet|"252566|"Partial Complex Seizure|"2|"0.5"  
"18333|"Temazepam 15 MG Oral Capsule|"61108|"Insomnia|"15|"0.6"  
"18333|"Temazepam 15 MG Oral Capsule|"75080|"Parkinson's Disease|"2|"0.285714"  
"18333|"Temazepam 15 MG Oral Capsule|"76351|"Depression|"5|"0.2"  
"18333|"Temazepam 15 MG Oral Capsule|"76357|"Major Depression, Recurrent|"4|"0.8"  
"18334|"Temazepam 30 MG Oral Capsule|"61108|"Insomnia|"11|"0.647059"  
"18334|"Temazepam 30 MG Oral Capsule|"76388|"Bipolar Disorder NOS|"2|"0.4"  
"18345|"Terazol 7 0.4 % Vaginal Cream|"66214|"Candida Albicans Vaginitis|"6|"1"  
"18345|"Terazol 7 0.4 % Vaginal Cream|"77211|"Vaginal Candidiasis|"8|"0.727273"  
"18345|"Terazol 7 0.4 % Vaginal Cream|"288790|"Bacterial Vaginosis|"2|"0.2"  
"18354|"Tetracycline HCl 250 MG Oral Capsule|"69913|"Rosacea|"2|"0.333333"  
"18374|"Methocarbamol 750 MG Oral Tablet|"31947|"Lumbago|"3|"0.214286"  
"18374|"Methocarbamol 750 MG Oral Tablet|"73403|"Neck Sprain|"2|"1"  
"18374|"Methocarbamol 750 MG Oral Tablet|"73454|"Lumbar Sprain|"3|"1"  
"18374|"Methocarbamol 750 MG Oral Tablet|"73464|"Lower Back Sprain|"4|"0.8"  
"18374|"Methocarbamol 750 MG Oral Tablet|"73666|"Backache|"3|"0.1875"  
"18374|"Methocarbamol 750 MG Oral Tablet|"74530|"Tension-type Headache|"5|"0.357143"  
"18374|"Methocarbamol 750 MG Oral Tablet|"75717|"Cervicalgia|"9|"0.346154"  
"18374|"Methocarbamol 750 MG Oral Tablet|"75811|"Muscle Spasm|"10|"0.434783"  
"18374|"Methocarbamol 750 MG Oral Tablet|"91056|"Upper Back Pain (Between Shoulder Blades)"|"2|"0.666667"  
"18374|"Methocarbamol 750 MG Oral Tablet|"91089|"Lower Back Pain|"25|"0.555556"  
"18374|"Methocarbamol 750 MG Oral Tablet|"115846|"Back Muscle Spasm|"6|"0.461538"  
"18374|"Methocarbamol 750 MG Oral Tablet|"172080|"Neck Strain|"2|"0.5"

"18374"|"Methocarbamol 750 MG Oral Tablet"|"172081"|"Shoulder Strain"|"3"|"1"  
"18374"|"Methocarbamol 750 MG Oral Tablet"|"173442"|"Lumbar Radiculopathy"|"4"|"0.4"  
"18374"|"Methocarbamol 750 MG Oral Tablet"|"288921"|"Chronic Pain"|"2"|"0.333333"  
"18374"|"Methocarbamol 750 MG Oral Tablet"|"288977"|"Fibromyalgia"|"2"|"0.333333"  
"18374"|"Methocarbamol 750 MG Oral Tablet"|"298920"|"Right Back Strain"|"3"|"1"  
"18374"|"Methocarbamol 750 MG Oral Tablet"|"298955"|"Multiple Muscle Strains"|"3"|"0.75"  
"18382"|"Methylphenidate HCl 5 MG Oral Tablet"|"75818"|"Attention-deficit Hyperactivity Disorder"|"7"|"0.583333"  
"18382"|"Methylphenidate HCl 5 MG Oral Tablet"|"75819"|"ADHD, Predominantly Inattentive Type"|"2"|"0.666667"  
"18382"|"Methylphenidate HCl 5 MG Oral Tablet"|"275486"|"ADHD, Combined Type"|"4"|"0.8"  
"18385"|"Metoclopramide HCl 10 MG Oral Tablet"|"60894"|"Nausea (Symptom)"|"6"|"0.352941"  
"18385"|"Metoclopramide HCl 10 MG Oral Tablet"|"60895"|"Vomiting (Symptom)"|"3"|"0.6"  
"18385"|"Metoclopramide HCl 10 MG Oral Tablet"|"60899"|"Abdominal Pain"|"3"|"0.1875"  
"18385"|"Metoclopramide HCl 10 MG Oral Tablet"|"64570"|"Food Poisoning"|"2"|"1"  
"18385"|"Metoclopramide HCl 10 MG Oral Tablet"|"64688"|"Esophageal Reflux"|"10"|"0.277778"  
"18385"|"Metoclopramide HCl 10 MG Oral Tablet"|"64748"|"Gastroparesis"|"4"|"0.285714"  
"18385"|"Metoclopramide HCl 10 MG Oral Tablet"|"69445"|"Diabetic Gastropathy"|"4"|"0.4"  
"18385"|"Metoclopramide HCl 10 MG Oral Tablet"|"74533"|"Migraine Headache"|"3"|"0.214286"  
"18385"|"Metoclopramide HCl 10 MG Oral Tablet"|"87702"|"Nausea With Vomiting"|"7"|"0.411765"  
"18385"|"Metoclopramide HCl 10 MG Oral Tablet"|"278812"|"Prostate Cancer"|"2"|"0.4"  
"18386"|"Metoclopramide HCl 5 MG Oral Tablet"|"60894"|"Nausea (Symptom)"|"4"|"0.5"  
"18386"|"Metoclopramide HCl 5 MG Oral Tablet"|"60899"|"Abdominal Pain"|"3"|"0.5"  
"18386"|"Metoclopramide HCl 5 MG Oral Tablet"|"64680"|"Chronic Reflux Esophagitis"|"8"|"0.571429"  
"18386"|"Metoclopramide HCl 5 MG Oral Tablet"|"64748"|"Gastroparesis"|"5"|"0.5"  
"18386"|"Metoclopramide HCl 5 MG Oral Tablet"|"70475"|"Scleroderma"|"6"|"0.375"  
"18386"|"Metoclopramide HCl 5 MG Oral Tablet"|"87702"|"Nausea With Vomiting"|"4"|"0.8"  
"18387"|"Metoprolol Tartrate 100 MG Oral Tablet"|"62916"|"Atrial Fibrillation"|"7"|"0.28"  
"18387"|"Metoprolol Tartrate 100 MG Oral Tablet"|"62975"|"Coronary Artery Disease"|"5"|"0.111111"  
"18387"|"Metoprolol Tartrate 100 MG Oral Tablet"|"63467"|"Hypertension"|"41"|"0.310606"  
"18387"|"Metoprolol Tartrate 100 MG Oral Tablet"|"63468"|"Essential Hypertension"|"24"|"0.45283"  
"18387"|"Metoprolol Tartrate 100 MG Oral Tablet"|"63470"|"Benign Essential Hypertension"|"23"|"0.46"  
"18388"|"Metoprolol Tartrate 50 MG Oral Tablet"|"62916"|"Atrial Fibrillation"|"11"|"0.289474"  
"18388"|"Metoprolol Tartrate 50 MG Oral Tablet"|"62975"|"Coronary Artery Disease"|"15"|"0.135135"  
"18388"|"Metoprolol Tartrate 50 MG Oral Tablet"|"62978"|"Coronary Arteriosclerosis"|"2"|"0.222222"  
"18388"|"Metoprolol Tartrate 50 MG Oral Tablet"|"63467"|"Hypertension"|"85"|"0.291096"  
"18388"|"Metoprolol Tartrate 50 MG Oral Tablet"|"63468"|"Essential Hypertension"|"44"|"0.44"  
"18388"|"Metoprolol Tartrate 50 MG Oral Tablet"|"63470"|"Benign Essential Hypertension"|"45"|"0.436893"  
"18388"|"Metoprolol Tartrate 50 MG Oral Tablet"|"69231"|"Hyperthyroidism"|"2"|"0.222222"  
"18391"|"MetroNIDAZOLE 500 MG Oral Tablet"|"60902"|"Diarrhea (Symptom)"|"15"|"0.306122"  
"18391"|"MetroNIDAZOLE 500 MG Oral Tablet"|"64579"|"Gastroenteritis"|"4"|"0.2"  
"18391"|"MetroNIDAZOLE 500 MG Oral Tablet"|"64629"|"Clostridium Difficile Colitis"|"2"|"0.666667"  
"18391"|"MetroNIDAZOLE 500 MG Oral Tablet"|"64632"|"Giardiasis"|"2"|"1"  
"18391"|"MetroNIDAZOLE 500 MG Oral Tablet"|"64934"|"Small Bowel Bacterial Overgrowth"|"3"|"1"  
"18391"|"MetroNIDAZOLE 500 MG Oral Tablet"|"64980"|"Crohn's Disease"|"4"|"0.444444"  
"18391"|"MetroNIDAZOLE 500 MG Oral Tablet"|"65061"|"Diverticulosis"|"2"|"0.25"  
"18391"|"MetroNIDAZOLE 500 MG Oral Tablet"|"65062"|"Colonic Diverticulosis"|"3"|"0.333333"  
"18391"|"MetroNIDAZOLE 500 MG Oral Tablet"|"65065"|"Diverticulitis Of Colon"|"11"|"0.44"  
"18391"|"MetroNIDAZOLE 500 MG Oral Tablet"|"66213"|"Vaginitis"|"83"|"0.535484"  
"18391"|"MetroNIDAZOLE 500 MG Oral Tablet"|"66216"|"Nonspecific Vaginitis"|"6"|"0.461538"  
"18391"|"MetroNIDAZOLE 500 MG Oral Tablet"|"66217"|"Trichomonas Vaginalis Vaginitis"|"25"|"0.641026"  
"18391"|"MetroNIDAZOLE 500 MG Oral Tablet"|"66249"|"Vulvovaginitis"|"3"|"0.6"  
"18391"|"MetroNIDAZOLE 500 MG Oral Tablet"|"66254"|"Trichomonas Vulvovaginitis"|"70"|"0.833333"  
"18391"|"MetroNIDAZOLE 500 MG Oral Tablet"|"74644"|"Brain Abscess"|"2"|"1"  
"18391"|"MetroNIDAZOLE 500 MG Oral Tablet"|"76976"|"Helicobacter Pylori (H. Pylori) Infection"|"2"|"0.25"  
"18391"|"MetroNIDAZOLE 500 MG Oral Tablet"|"77833"|"Trichomoniasis"|"7"|"0.7"

"18391"|"MetroNIDAZOLE 500 MG Oral Tablet"|"77837"|"Urogenital Trichomoniasis"|"2"|"0.666667"  
"18391"|"MetroNIDAZOLE 500 MG Oral Tablet"|"77872"|"Pelvic Inflammatory Disease"|"6"|"0.5"  
"18391"|"MetroNIDAZOLE 500 MG Oral Tablet"|"116896"|"Vaginal Discharge (On Exam)"|"3"|"0.428571"  
"18391"|"MetroNIDAZOLE 500 MG Oral Tablet"|"282704"|"Acute Gastritis"|"2"|"0.2"  
"18391"|"MetroNIDAZOLE 500 MG Oral Tablet"|"288761"|"Vaginal Discharge"|"42"|"0.407767"  
"18391"|"MetroNIDAZOLE 500 MG Oral Tablet"|"288790"|"Bacterial Vaginosis"|"927"|"0.941117"  
"18436"|"Minocycline HCl 100 MG Oral Capsule"|"62588"|"Chronic Ethmoidal Sinusitis"|"7"|"0.583333"  
"18436"|"Minocycline HCl 100 MG Oral Capsule"|"69606"|"Acne"|"2"|"0.2"  
"18436"|"Minocycline HCl 100 MG Oral Capsule"|"69607"|"Acne Vulgaris"|"3"|"0.75"  
"18436"|"Minocycline HCl 100 MG Oral Capsule"|"69999"|"Cellulitis"|"2"|"0.333333"  
"18436"|"Minocycline HCl 100 MG Oral Capsule"|"74027"|"Osteomyelitis"|"3"|"1"  
"18437"|"Minocycline HCl 50 MG Oral Capsule"|"69606"|"Acne"|"4"|"0.666667"  
"18437"|"Minocycline HCl 50 MG Oral Capsule"|"69607"|"Acne Vulgaris"|"2"|"1"  
"18557"|"Morphine Sulfate 15 MG Oral Tablet"|"60899"|"Abdominal Pain"|"2"|"0.5"  
"18557"|"Morphine Sulfate 15 MG Oral Tablet"|"288921"|"Chronic Pain"|"2"|"0.222222"  
"18703"|"Transderm-Scop 1.5 MG Transdermal Patch 72 Hour"|"62516"|"Motion Sickness"|"6"|"1"  
"18703"|"Transderm-Scop 1.5 MG Transdermal Patch 72 Hour"|"252601"|"Vertigo"|"2"|"0.5"  
"18703"|"Transderm-Scop 1.5 MG Transdermal Patch 72 Hour"|"274499"|"Seasickness"|"6"|"0.857143"  
"18703"|"Transderm-Scop 1.5 MG Transdermal Patch 72 Hour"|"274511"|"Travel Sickness"|"5"|"0.714286"  
"18712"|"TraZODone HCl 100 MG Oral Tablet"|"30261"|"Bipolar I Disorder, Most Recent Episode, Depressed - Severe With Psychotic Features"|"3"|"1"  
"18712"|"TraZODone HCl 100 MG Oral Tablet"|"61103"|"Sleep Disturbances"|"2"|"1"  
"18712"|"TraZODone HCl 100 MG Oral Tablet"|"61108"|"Insomnia"|"31"|"0.574074"  
"18712"|"TraZODone HCl 100 MG Oral Tablet"|"75929"|"Mood Disorder Due To General Medical Condition"|"5"|"0.833333"  
"18712"|"TraZODone HCl 100 MG Oral Tablet"|"76212"|"Psychosis"|"3"|"0.5"  
"18712"|"TraZODone HCl 100 MG Oral Tablet"|"76213"|"Schizophrenia"|"2"|"0.5"  
"18712"|"TraZODone HCl 100 MG Oral Tablet"|"76232"|"Paranoid Schizophrenia"|"5"|"0.833333"  
"18712"|"TraZODone HCl 100 MG Oral Tablet"|"76238"|"Paranoid Schizophrenia, Stable"|"2"|"0.666667"  
"18712"|"TraZODone HCl 100 MG Oral Tablet"|"76250"|"Residual Schizophrenia"|"2"|"1"  
"18712"|"TraZODone HCl 100 MG Oral Tablet"|"76272"|"Schizoaffective Disorder"|"6"|"0.75"  
"18712"|"TraZODone HCl 100 MG Oral Tablet"|"76276"|"Schizoaffective Disorder - Chronic (With Residual Symptoms)"|"2"|"0.666667"  
"18712"|"TraZODone HCl 100 MG Oral Tablet"|"76306"|"Episodic Mood Disorders"|"3"|"0.428571"  
"18712"|"TraZODone HCl 100 MG Oral Tablet"|"76307"|"Bipolar Disorder"|"2"|"0.2"  
"18712"|"TraZODone HCl 100 MG Oral Tablet"|"76351"|"Depression"|"22"|"0.297297"  
"18712"|"TraZODone HCl 100 MG Oral Tablet"|"76357"|"Major Depression, Recurrent"|"14"|"0.608696"  
"18712"|"TraZODone HCl 100 MG Oral Tablet"|"76361"|"Moderate Recurrent Major Depression"|"2"|"0.4"  
"18712"|"TraZODone HCl 100 MG Oral Tablet"|"76363"|"Major Depression, Recurrent With Psychotic Features"|"8"|"0.888889"  
"18712"|"TraZODone HCl 100 MG Oral Tablet"|"76388"|"Bipolar Disorder NOS"|"6"|"0.4"  
"18712"|"TraZODone HCl 100 MG Oral Tablet"|"76536"|"Generalized Anxiety Disorder"|"5"|"0.227273"  
"18712"|"TraZODone HCl 100 MG Oral Tablet"|"76587"|"Anxiety Disorder NOS"|"3"|"0.230769"  
"18712"|"TraZODone HCl 100 MG Oral Tablet"|"251627"|"Adjustment Disorder With Depressed Mood"|"2"|"1"  
"18712"|"TraZODone HCl 100 MG Oral Tablet"|"275526"|"Severe Recurrent Major Depression Without Psychotic Features"|"2"|"1"  
"18712"|"TraZODone HCl 100 MG Oral Tablet"|"275592"|"Post-traumatic Stress Disorder"|"3"|"0.272727"  
"18713"|"TraZODone HCl 150 MG Oral Tablet"|"61108"|"Insomnia"|"6"|"0.6"  
"18713"|"TraZODone HCl 150 MG Oral Tablet"|"75929"|"Mood Disorder Due To General Medical Condition"|"2"|"0.666667"  
"18713"|"TraZODone HCl 150 MG Oral Tablet"|"76307"|"Bipolar Disorder"|"3"|"0.25"  
"18713"|"TraZODone HCl 150 MG Oral Tablet"|"76351"|"Depression"|"6"|"0.25"  
"18713"|"TraZODone HCl 150 MG Oral Tablet"|"251467"|"Limb Pain"|"2"|"0.25"  
"18721"|"Naproxen Sodium 550 MG Oral Tablet"|"66133"|"Dysmenorrhea"|"6"|"0.75"

"18721"|"Naproxen Sodium 550 MG Oral Tablet"|"70455"|"Rheumatoid Arthritis"|"2"|"1"  
"18721"|"Naproxen Sodium 550 MG Oral Tablet"|"80664"|"Leiomyoma Of The Uterus"|"3"|"0.5"  
"18721"|"Naproxen Sodium 550 MG Oral Tablet"|"172080"|"Neck Strain"|"2"|"1"  
"18804"|"Niacin 500 MG Oral Tablet"|"67970"|"Hyperlipidemia"|"12"|"0.285714"  
"18805"|"Niacin CR 1000 MG Oral Tablet Extended Release"|"67970"|"Hyperlipidemia"|"3"|"0.5"  
"18807"|"Niacin CR 500 MG Oral Tablet Extended Release"|"67970"|"Hyperlipidemia"|"3"|"0.75"  
"18818"|"Triamcinolone Acetonide 0.025 % External Cream"|"69710"|"Contact Dermatitis"|"3"|"0.230769"  
"18818"|"Triamcinolone Acetonide 0.025 % External Cream"|"70112"|"Atopic Dermatitis"|"13"|"0.619048"  
"18818"|"Triamcinolone Acetonide 0.025 % External Cream"|"93705"|"Dermatitis"|"4"|"0.4"  
"18818"|"Triamcinolone Acetonide 0.025 % External Cream"|"278350"|"Eczema"|"34"|"0.755556"  
"18819"|"Triamcinolone Acetonide 0.1 % External Cream"|"69710"|"Contact Dermatitis"|"20"|"0.392157"  
"18819"|"Triamcinolone Acetonide 0.1 % External Cream"|"69753"|"Eczematoid Dermatitis"|"14"|"0.518519"  
"18819"|"Triamcinolone Acetonide 0.1 % External Cream"|"69806"|"Lichen Simplex Chronicus"|"2"|"1"  
"18819"|"Triamcinolone Acetonide 0.1 % External Cream"|"69885"|"Pityriasis Rosea"|"3"|"0.6"  
"18819"|"Triamcinolone Acetonide 0.1 % External Cream"|"69918"|"Keloid Scar"|"2"|"0.5"  
"18819"|"Triamcinolone Acetonide 0.1 % External Cream"|"69942"|"Allergic Urticaria"|"7"|"0.636364"  
"18819"|"Triamcinolone Acetonide 0.1 % External Cream"|"69964"|"Xerosis Cutis"|"4"|"0.5"  
"18819"|"Triamcinolone Acetonide 0.1 % External Cream"|"70112"|"Atopic Dermatitis"|"75"|"0.576923"  
"18819"|"Triamcinolone Acetonide 0.1 % External Cream"|"70126"|"Tinea Versicolor"|"2"|"0.4"  
"18819"|"Triamcinolone Acetonide 0.1 % External Cream"|"70719"|"Psoriatic Arthropathy"|"2"|"0.666667"  
"18819"|"Triamcinolone Acetonide 0.1 % External Cream"|"81335"|"Multiple Nonvenomous Insect Bites"|"2"|"0.4"  
"18819"|"Triamcinolone Acetonide 0.1 % External Cream"|"93705"|"Dermatitis"|"31"|"0.607843"  
"18819"|"Triamcinolone Acetonide 0.1 % External Cream"|"258010"|"Allergic Reaction"|"2"|"0.4"  
"18819"|"Triamcinolone Acetonide 0.1 % External Cream"|"278317"|"Dermatitis Due To Contact With Poison Ivy"|"3"|"0.5"  
"18819"|"Triamcinolone Acetonide 0.1 % External Cream"|"278350"|"Eczema"|"91"|"0.572327"  
"18819"|"Triamcinolone Acetonide 0.1 % External Cream"|"288764"|"Vulvodynia"|"6"|"0.857143"  
"18819"|"Triamcinolone Acetonide 0.1 % External Cream"|"298801"|"Dyshidrotic Eczema"|"2"|"0.666667"  
"18820"|"Triamcinolone Acetonide 0.025 % External Lotion"|"278350"|"Eczema"|"2"|"0.666667"  
"18821"|"Triamcinolone Acetonide 0.1 % External Lotion"|"70112"|"Atopic Dermatitis"|"4"|"0.4"  
"18821"|"Triamcinolone Acetonide 0.1 % External Lotion"|"93705"|"Dermatitis"|"2"|"0.5"  
"18821"|"Triamcinolone Acetonide 0.1 % External Lotion"|"278350"|"Eczema"|"9"|"0.642857"  
"18822"|"Triamcinolone Acetonide 0.025 % External Ointment"|"70112"|"Atopic Dermatitis"|"6"|"0.545455"  
"18822"|"Triamcinolone Acetonide 0.025 % External Ointment"|"278350"|"Eczema"|"17"|"0.73913"  
"18823"|"Triamcinolone Acetonide 0.1 % External Ointment"|"69710"|"Contact Dermatitis"|"7"|"0.4375"  
"18823"|"Triamcinolone Acetonide 0.1 % External Ointment"|"69753"|"Eczematoid Dermatitis"|"2"|"0.2"  
"18823"|"Triamcinolone Acetonide 0.1 % External Ointment"|"69964"|"Xerosis Cutis"|"2"|"0.666667"  
"18823"|"Triamcinolone Acetonide 0.1 % External Ointment"|"70112"|"Atopic Dermatitis"|"22"|"0.468085"  
"18823"|"Triamcinolone Acetonide 0.1 % External Ointment"|"88375"|"Skin: A Rash"|"2"|"0.666667"  
"18823"|"Triamcinolone Acetonide 0.1 % External Ointment"|"93705"|"Dermatitis"|"5"|"0.5"  
"18823"|"Triamcinolone Acetonide 0.1 % External Ointment"|"191631"|"Gastrostomy Care"|"3"|"0.6"  
"18823"|"Triamcinolone Acetonide 0.1 % External Ointment"|"278350"|"Eczema"|"60"|"0.618557"  
"18828"|"Triamterene-HCTZ 37.5-25 MG Oral Tablet"|"63467"|"Hypertension"|"25"|"0.287356"  
"18828"|"Triamterene-HCTZ 37.5-25 MG Oral Tablet"|"63468"|"Essential Hypertension"|"17"|"0.404762"  
"18828"|"Triamterene-HCTZ 37.5-25 MG Oral Tablet"|"63470"|"Benign Essential Hypertension"|"16"|"0.5"  
"18828"|"Triamterene-HCTZ 37.5-25 MG Oral Tablet"|"250579"|"Blood Pressure Isolated Elevated"|"2"|"1"  
"18828"|"Triamterene-HCTZ 37.5-25 MG Oral Tablet"|"282680"|"Edema"|"3"|"0.375"  
"18829"|"Triamterene-HCTZ 50-25 MG CAPS"|"63467"|"Hypertension"|"2"|"0.333333"  
"18829"|"Triamterene-HCTZ 50-25 MG CAPS"|"63468"|"Essential Hypertension"|"3"|"0.75"  
"18830"|"Triamterene-HCTZ 75-50 MG Oral Tablet"|"63467"|"Hypertension"|"10"|"0.322581"  
"18830"|"Triamterene-HCTZ 75-50 MG Oral Tablet"|"63468"|"Essential Hypertension"|"11"|"0.647059"  
"18830"|"Triamterene-HCTZ 75-50 MG Oral Tablet"|"63470"|"Benign Essential Hypertension"|"12"|"0.6"  
"18849"|"Trihexyphenidyl HCl 5 MG Oral Tablet"|"76276"|"Schizoaffective Disorder - Chronic (With Residual Symptoms)"|"2"|"1"

"18961""Nortriptyline HCl 10 MG Oral Capsule""74533""Migraine Headache""8""0.275862"  
"18961""Nortriptyline HCl 10 MG Oral Capsule""74551""Non-migrainous Vascular Headache""3""0.428571"  
"18961""Nortriptyline HCl 10 MG Oral Capsule""75125""Multiple Sclerosis""2""0.2"  
"18961""Nortriptyline HCl 10 MG Oral Capsule""75582""Spinal Adhesive Arachnoiditis""2""1"  
"18961""Nortriptyline HCl 10 MG Oral Capsule""75701""Meralgia Paresthetica""2""1"  
"18961""Nortriptyline HCl 10 MG Oral Capsule""76610""Chronic Pain Syndrome""6""0.75"  
"18962""Nortriptyline HCl 50 MG Oral Capsule""76351""Depression""3""0.3"  
"18971""NovoLIN N 100 UNIT/ML Subcutaneous Suspension""66433""Pregnancy Complicated By Diabetes Mellitus""13""0.866667"  
"18971""NovoLIN N 100 UNIT/ML Subcutaneous Suspension""69380""Diabetes Mellitus""25""0.384615"  
"18971""NovoLIN N 100 UNIT/ML Subcutaneous Suspension""69381""Type II Diabetes Mellitus""5""0.227273"  
"18971""NovoLIN N 100 UNIT/ML Subcutaneous Suspension""69382""Type II Diabetes Mellitus - Uncomplicated, Uncontrolled""3""0.375"  
"18971""NovoLIN N 100 UNIT/ML Subcutaneous Suspension""69387""Type I Diabetes Mellitus""3""0.3"  
"18971""NovoLIN N 100 UNIT/ML Subcutaneous Suspension""69388""Type I Diabetes Mellitus - Uncontrolled""2""0.5"  
"18971""NovoLIN N 100 UNIT/ML Subcutaneous Suspension""69402""Diabetes Mellitus Poorly Controlled""7""0.291667"  
"18971""NovoLIN N 100 UNIT/ML Subcutaneous Suspension""258942""Type II Diabetes Mellitus - Uncomplicated, Controlled""3""0.6"  
"19050""Unisom 25 MG Oral Tablet""87702""Nausea With Vomiting""3""1"  
"19082""Valproic Acid 250 MG Oral Capsule""60828""Headache""5""0.555556"  
"19082""Valproic Acid 250 MG Oral Capsule""61124""Highly Irritable""2""1"  
"19082""Valproic Acid 250 MG Oral Capsule""74533""Migraine Headache""5""0.3125"  
"19082""Valproic Acid 250 MG Oral Capsule""74537""Common Migraine (Without Aura)""3""0.75"  
"19082""Valproic Acid 250 MG Oral Capsule""74551""Non-migrainous Vascular Headache""2""1"  
"19082""Valproic Acid 250 MG Oral Capsule""74988""Seizure Disorder""2""0.2"  
"19082""Valproic Acid 250 MG Oral Capsule""75020""Alzheimer's Disease""2""0.4"  
"19082""Valproic Acid 250 MG Oral Capsule""76343""Bipolar I Disorder, Most Recent Episode, Depressed - Moderate""2""1"  
"19082""Valproic Acid 250 MG Oral Capsule""163354""Demonstrated Behavior Psychomotor Agitation""3""1"  
"19082""Valproic Acid 250 MG Oral Capsule""251600""Dementia""3""0.428571"  
"19082""Valproic Acid 250 MG Oral Capsule""252573""Frontotemporal Dementia""4""0.666667"  
"19082""Valproic Acid 250 MG Oral Capsule""297231""Epilepsy""2""0.666667"  
"19125""Nutralderm External Lotion""70112""Atopic Dermatitis""5""0.5"  
"19125""Nutralderm External Lotion""278350""Eczema""9""0.692308"  
"19135""Nystatin 100000 UNIT/GM External Cream""66213""Vaginitis""2""0.4"  
"19135""Nystatin 100000 UNIT/GM External Cream""66250""Candida Albicans Vulvovaginitis""7""0.583333"  
"19135""Nystatin 100000 UNIT/GM External Cream""70124""Tinea Corporis""3""0.166667"  
"19135""Nystatin 100000 UNIT/GM External Cream""70126""Tinea Versicolor""2""1"  
"19135""Nystatin 100000 UNIT/GM External Cream""70130""Diaper Rash""69""0.514925"  
"19135""Nystatin 100000 UNIT/GM External Cream""77205""Candidiasis""46""0.554217"  
"19135""Nystatin 100000 UNIT/GM External Cream""77210""Cutaneous Candidiasis""66""0.725275"  
"19135""Nystatin 100000 UNIT/GM External Cream""77211""Vaginal Candidiasis""3""0.428571"  
"19135""Nystatin 100000 UNIT/GM External Cream""77216""Genitourinary Candidiasis""4""0.363636"  
"19135""Nystatin 100000 UNIT/GM External Cream""88375""Skin: A Rash""4""0.4"  
"19135""Nystatin 100000 UNIT/GM External Cream""168632""Tinea Cruris Of The Groin""2""1"  
"19135""Nystatin 100000 UNIT/GM External Cream""173522""Candidal Intertrigo""17""0.515152"  
"19135""Nystatin 100000 UNIT/GM External Cream""278139""Neonatal Candidiasis Of The Diaper Region""36""0.467532"  
"19135""Nystatin 100000 UNIT/GM External Cream""283255""Balanitis""4""1"  
"19136""Nystatin 100000 UNIT/ML Mouth/Throat Suspension""70472""Systemic Lupus Erythematosus""2""0.2"  
"19136""Nystatin 100000 UNIT/ML Mouth/Throat Suspension""76842""Acquired Immunodeficiency Syndrome (AIDS)""2""0.222222"

"19136""Nystatin 100000 UNIT/ML Mouth/Throat Suspension""77205""Candidiasis""10""0.37037"  
"19136""Nystatin 100000 UNIT/ML Mouth/Throat Suspension""77206""Oral Thrush""203""0.72242"  
"19136""Nystatin 100000 UNIT/ML Mouth/Throat Suspension""278812""Prostate Cancer""2""0.222222"  
"19136""Nystatin 100000 UNIT/ML Mouth/Throat Suspension""288997""Oral Thrush Of Newborn""37""0.685185"  
"19139""Nystatin-Triamcinolone 100000-0.1 UNIT/GM-% External Cream""69710""Contact Dermatitis""2""0.5"  
"19139""Nystatin-Triamcinolone 100000-0.1 UNIT/GM-% External Cream""70126""Tinea Versicolor""2""1"  
"19139""Nystatin-Triamcinolone 100000-0.1 UNIT/GM-% External Cream""77205""Candidiasis""3""0.75"  
"19139""Nystatin-Triamcinolone 100000-0.1 UNIT/GM-% External Cream""88375""Skin: A Rash""2""1"  
"19139""Nystatin-Triamcinolone 100000-0.1 UNIT/GM-% External Cream""168632""Tinea Cruris Of The Groin""2""1"  
"19276""Vitamin B-12 1000 MCG Oral Tablet""77962""Anemia""2""0.5"  
"19276""Vitamin B-12 1000 MCG Oral Tablet""257948""Vitamin B12 Deficiency""8""0.571429"  
"19284""Vitamin B-6 100 MG Oral Tablet""77403""Latent Tuberculosis""2""0.666667"  
"19286""Vitamin B-6 25 MG Oral Tablet""74988""Seizure Disorder""2""0.666667"  
"19286""Vitamin B-6 25 MG Oral Tablet""77403""Latent Tuberculosis""2""0.5"  
"19293""Vitamin C 250 MG Oral Tablet""80830""Malignant Neoplasm Of The Prostate Gland""4""1"  
"19293""Vitamin C 250 MG Oral Tablet""278812""Prostate Cancer""11""0.647059"  
"19313""Oxistat 1 % External Cream""70124""Tinea Corporis""12""0.923077"  
"19316""Oxybutynin Chloride 5 MG Oral Tablet""65769""Neurogenic Bladder""6""0.857143"  
"19316""Oxybutynin Chloride 5 MG Oral Tablet""65777""Urge Incontinence Of Urine""2""0.4"  
"19316""Oxybutynin Chloride 5 MG Oral Tablet""65855""Female Stress Incontinence""4""0.666667"  
"19316""Oxybutynin Chloride 5 MG Oral Tablet""75125""Multiple Sclerosis""4""0.25"  
"19316""Oxybutynin Chloride 5 MG Oral Tablet""87902""Urinary Frequency More Than Twice At Night (Nocturia)""2""0.5"  
"19316""Oxybutynin Chloride 5 MG Oral Tablet""289131""Benign Prostatic Hypertrophy""2""0.333333"  
"19316""Oxybutynin Chloride 5 MG Oral Tablet""296638""Urinary Incontinence""9""0.75"  
"19374""Warfarin Sodium 2 MG Oral Tablet""62916""Atrial Fibrillation""18""0.5625"  
"19374""Warfarin Sodium 2 MG Oral Tablet""64277""Pulmonary Embolism""3""0.6"  
"19374""Warfarin Sodium 2 MG Oral Tablet""77961""Protein S Deficiency""2""1"  
"19375""Warfarin Sodium 2.5 MG Oral Tablet""62916""Atrial Fibrillation""30""0.483871"  
"19375""Warfarin Sodium 2.5 MG Oral Tablet""63217""Congestive Heart Failure""4""0.133333"  
"19376""Warfarin Sodium 5 MG Oral Tablet""62914""Atrial Flutter""4""0.2"  
"19376""Warfarin Sodium 5 MG Oral Tablet""62916""Atrial Fibrillation""102""0.579545"  
"19376""Warfarin Sodium 5 MG Oral Tablet""62917""Paroxysmal Atrial Fibrillation""4""0.363636"  
"19376""Warfarin Sodium 5 MG Oral Tablet""63217""Congestive Heart Failure""7""0.101449"  
"19376""Warfarin Sodium 5 MG Oral Tablet""63271""Aortic Stenosis""2""0.2"  
"19376""Warfarin Sodium 5 MG Oral Tablet""63303""Mitral Valve Disorder""2""0.333333"  
"19376""Warfarin Sodium 5 MG Oral Tablet""63484""Pulmonary Hypertension""2""0.2"  
"19376""Warfarin Sodium 5 MG Oral Tablet""63726""Atherosclerosis Of The Extremities With Intermittent Claudication""2""0.333333"  
"19376""Warfarin Sodium 5 MG Oral Tablet""63746""Venous Thrombosis""2""0.333333"  
"19376""Warfarin Sodium 5 MG Oral Tablet""64041""Thromboembolic Disease""3""0.75"  
"19376""Warfarin Sodium 5 MG Oral Tablet""64067""Thrombophlebitis Of Deep Vessels Of The Lower Extremity""3""0.272727"  
"19376""Warfarin Sodium 5 MG Oral Tablet""64277""Pulmonary Embolism""9""0.243243"  
"19376""Warfarin Sodium 5 MG Oral Tablet""75356""Cerebral Embolism - With Cerebral Infarction""3""0.272727"  
"19376""Warfarin Sodium 5 MG Oral Tablet""78050""Antiphospholipid Syndrome""3""0.6"  
"19376""Warfarin Sodium 5 MG Oral Tablet""201186""Ischemic Stroke""2""0.2"  
"19376""Warfarin Sodium 5 MG Oral Tablet""257802""Venous Thrombosis Of The Deep Vessels Of The Lower Extremity""7""0.259259"  
"19376""Warfarin Sodium 5 MG Oral Tablet""257804""Venous Thrombosis Of The Deep Vessels Of The Distal Lower Extremity""2""0.4"  
"19376""Warfarin Sodium 5 MG Oral Tablet""259451""Primary Hypercoagulable State""2""0.5"

"19376"|"Warfarin Sodium 5 MG Oral Tablet"|"296985"|"Acute Venous Thrombosis Of The Deep Vessels Of The Lower Extremity"|"4"|"0.5"  
"19376"|"Warfarin Sodium 5 MG Oral Tablet"|"297004"|"Acute Venous Thrombosis Of The Deep Vessels Of The Distal Lower Extremity"|"2"|"0.5"  
"19377"|"Warfarin Sodium 7.5 MG Oral Tablet"|"62916"|"Atrial Fibrillation"|"8"|"0.333333"  
"19377"|"Warfarin Sodium 7.5 MG Oral Tablet"|"63484"|"Pulmonary Hypertension"|"2"|"0.4"  
"19377"|"Warfarin Sodium 7.5 MG Oral Tablet"|"64041"|"Thromboembolic Disease"|"2"|"1"  
"19377"|"Warfarin Sodium 7.5 MG Oral Tablet"|"75187"|"Stroke Of The Left Posterior Cerebral Artery"|"2"|"1"  
"19377"|"Warfarin Sodium 7.5 MG Oral Tablet"|"93460"|"Taking Blood Thinners For A Long Time"|"2"|"0.222222"  
"19384"|"Wellbutrin 75 MG Oral Tablet"|"76351"|"Depression"|"5"|"0.555556"  
"19427"|"Paxil 30 MG Oral Tablet"|"76351"|"Depression"|"2"|"0.333333"  
"19452"|"Xanax 2 MG Oral Tablet"|"61118"|"Anxiety (Symptom)"|"2"|"0.5"  
"19498"|"Zocor 20 MG Oral Tablet"|"67970"|"Hyperlipidemia"|"9"|"0.1875"  
"19501"|"Zofran 4 MG Oral Tablet"|"66394"|"Hyperemesis Gravidarum"|"2"|"1"  
"19502"|"Zoloft 100 MG Oral Tablet"|"76351"|"Depression"|"7"|"0.189189"  
"19502"|"Zoloft 100 MG Oral Tablet"|"76363"|"Major Depression, Recurrent With Psychotic Features"|"2"|"0.666667"  
"19511"|"Acyclovir 200 MG Oral Capsule"|"76781"|"Herpes Simplex"|"3"|"0.5"  
"19511"|"Acyclovir 200 MG Oral Capsule"|"76786"|"Herpes Simplex Acute Gingivostomatitis"|"2"|"0.666667"  
"19512"|"Acyclovir 400 MG Oral Tablet"|"76781"|"Herpes Simplex"|"18"|"0.75"  
"19512"|"Acyclovir 400 MG Oral Tablet"|"76782"|"Herpes Simplex Type I"|"2"|"0.666667"  
"19512"|"Acyclovir 400 MG Oral Tablet"|"76783"|"Herpes Simplex Type II"|"13"|"0.764706"  
"19512"|"Acyclovir 400 MG Oral Tablet"|"76794"|"Herpes Zoster (Shingles)"|"2"|"0.4"  
"19512"|"Acyclovir 400 MG Oral Tablet"|"76835"|"HIV Infection"|"6"|"0.375"  
"19512"|"Acyclovir 400 MG Oral Tablet"|"76842"|"Acquired Immunodeficiency Syndrome (AIDS)"|"2"|"0.25"  
"19517"|"Aspirin 81 MG Oral Tablet"|"62975"|"Coronary Artery Disease"|"72"|"0.174334"  
"19517"|"Aspirin 81 MG Oral Tablet"|"62978"|"Coronary Arteriosclerosis"|"7"|"0.189189"  
"19517"|"Aspirin 81 MG Oral Tablet"|"63148"|"2-vessel Coronary Artery Stenosis"|"2"|"0.4"  
"19517"|"Aspirin 81 MG Oral Tablet"|"63173"|"Cardiomyopathy"|"3"|"0.115385"  
"19517"|"Aspirin 81 MG Oral Tablet"|"63224"|"Congestive Heart Failure With Systolic And Diastolic Dysfunction"|"2"|"0.25"  
"19517"|"Aspirin 81 MG Oral Tablet"|"63467"|"Hypertension"|"20"|"0.0198413"  
"19517"|"Aspirin 81 MG Oral Tablet"|"63470"|"Benign Essential Hypertension"|"12"|"0.0530973"  
"19517"|"Aspirin 81 MG Oral Tablet"|"63526"|"Hypoplastic Left Heart Syndrome"|"3"|"1"  
"19517"|"Aspirin 81 MG Oral Tablet"|"70472"|"Systemic Lupus Erythematosus"|"4"|"0.181818"  
"19517"|"Aspirin 81 MG Oral Tablet"|"75032"|"Vascular Dementia"|"13"|"0.52"  
"19517"|"Aspirin 81 MG Oral Tablet"|"78050"|"Antiphospholipid Syndrome"|"2"|"0.285714"  
"19518"|"Atenolol-Chlorthalidone 100-25 MG Oral Tablet"|"63467"|"Hypertension"|"8"|"0.470588"  
"19518"|"Atenolol-Chlorthalidone 100-25 MG Oral Tablet"|"63468"|"Essential Hypertension"|"5"|"0.625"  
"19518"|"Atenolol-Chlorthalidone 100-25 MG Oral Tablet"|"63470"|"Benign Essential Hypertension"|"3"|"0.428571"  
"19519"|"Atenolol-Chlorthalidone 50-25 MG Oral Tablet"|"63467"|"Hypertension"|"13"|"0.361111"  
"19519"|"Atenolol-Chlorthalidone 50-25 MG Oral Tablet"|"63468"|"Essential Hypertension"|"8"|"0.470588"  
"19519"|"Atenolol-Chlorthalidone 50-25 MG Oral Tablet"|"63470"|"Benign Essential Hypertension"|"12"|"0.631579"  
"19528"|"Bumetanide 1 MG Oral Tablet"|"63217"|"Congestive Heart Failure"|"2"|"0.285714"  
"19529"|"BuPROPion HCl 75 MG Oral Tablet"|"76307"|"Bipolar Disorder"|"2"|"0.666667"  
"19529"|"BuPROPion HCl 75 MG Oral Tablet"|"76351"|"Depression"|"29"|"0.707317"  
"19529"|"BuPROPion HCl 75 MG Oral Tablet"|"76357"|"Major Depression, Recurrent"|"10"|"0.714286"  
"19529"|"BuPROPion HCl 75 MG Oral Tablet"|"76383"|"Dysthymic Disorder"|"3"|"0.75"  
"19529"|"BuPROPion HCl 75 MG Oral Tablet"|"76388"|"Bipolar Disorder NOS"|"2"|"0.5"  
"19529"|"BuPROPion HCl 75 MG Oral Tablet"|"76536"|"Generalized Anxiety Disorder"|"3"|"0.3"  
"19572"|"Perphenazine 16 MG Oral Tablet"|"76272"|"Schizoaffective Disorder"|"2"|"1"  
"19581"|"Captopril 25 MG Oral Tablet"|"63468"|"Essential Hypertension"|"2"|"0.4"  
"19590"|"Chlorhexidine Gluconate 0.12 % Mouth/Throat Solution"|"62803"|"Acute Gingivitis"|"2"|"1"  
"19590"|"Chlorhexidine Gluconate 0.12 % Mouth/Throat Solution"|"71094"|"Closed Fracture Of The Lower Jaw - Multiple Sites"|"3"|"0.6"

"19590"|"Chlorhexidine Gluconate 0.12 % Mouth/Throat Solution"|"71097"|"Open Fracture Of Mandible / Lower Jaw"|"2"|"0.333333"

"19590"|"Chlorhexidine Gluconate 0.12 % Mouth/Throat Solution"|"82407"|"Gunshot Wound Of The Face"|"2"|"1"

"19597"|"Clobetasol Propionate 0.05 % External Solution"|"70135"|"Seborrheic Dermatitis"|"5"|"1"

"19598"|"Clonazepam 0.5 MG Oral Tablet"|"30261"|"Bipolar I Disorder, Most Recent Episode, Depressed - Severe With Psychotic Features"|"2"|"1"

"19598"|"Clonazepam 0.5 MG Oral Tablet"|"61108"|"Insomnia"|"13"|"0.183099"

"19598"|"Clonazepam 0.5 MG Oral Tablet"|"61118"|"Anxiety (Symptom)"|"45"|"0.542169"

"19598"|"Clonazepam 0.5 MG Oral Tablet"|"74988"|"Seizure Disorder"|"12"|"0.16"

"19598"|"Clonazepam 0.5 MG Oral Tablet"|"75002"|"Partial Complex Psychomotor Seizure With Intractable Seizure"|"3"|"0.230769"

"19598"|"Clonazepam 0.5 MG Oral Tablet"|"75052"|"Tardive Dyskinesia"|"2"|"0.5"

"19598"|"Clonazepam 0.5 MG Oral Tablet"|"75054"|"Restless Legs Syndrome"|"6"|"0.25"

"19598"|"Clonazepam 0.5 MG Oral Tablet"|"75080"|"Parkinson's Disease"|"13"|"0.317073"

"19598"|"Clonazepam 0.5 MG Oral Tablet"|"75104"|"Familial (Benign Essential) Tremor"|"4"|"0.266667"

"19598"|"Clonazepam 0.5 MG Oral Tablet"|"75125"|"Multiple Sclerosis"|"12"|"0.3"

"19598"|"Clonazepam 0.5 MG Oral Tablet"|"75929"|"Mood Disorder Due To General Medical Condition"|"2"|"0.666667"

"19598"|"Clonazepam 0.5 MG Oral Tablet"|"75932"|"Anxiety Disorder Due To General Medical Condition With Generalized Anxiety"|"2"|"0.333333"

"19598"|"Clonazepam 0.5 MG Oral Tablet"|"75933"|"Anxiety Disorder Due To General Medical Condition With Panic Attacks"|"2"|"1"

"19598"|"Clonazepam 0.5 MG Oral Tablet"|"76232"|"Paranoid Schizophrenia"|"3"|"1"

"19598"|"Clonazepam 0.5 MG Oral Tablet"|"76238"|"Paranoid Schizophrenia, Stable"|"2"|"1"

"19598"|"Clonazepam 0.5 MG Oral Tablet"|"76250"|"Residual Schizophrenia"|"2"|"1"

"19598"|"Clonazepam 0.5 MG Oral Tablet"|"76272"|"Schizoaffective Disorder"|"5"|"0.833333"

"19598"|"Clonazepam 0.5 MG Oral Tablet"|"76276"|"Schizoaffective Disorder - Chronic (With Residual Symptoms)"|"3"|"0.75"

"19598"|"Clonazepam 0.5 MG Oral Tablet"|"76306"|"Episodic Mood Disorders"|"2"|"0.25"

"19598"|"Clonazepam 0.5 MG Oral Tablet"|"76307"|"Bipolar Disorder"|"4"|"0.190476"

"19598"|"Clonazepam 0.5 MG Oral Tablet"|"76329"|"Bipolar I Disorder, Most Recent Episode, Mixed In Partial Remission"|"2"|"0.666667"

"19598"|"Clonazepam 0.5 MG Oral Tablet"|"76339"|"Bipolar I Disorder, Most Recent Episode, Depressed"|"2"|"0.4"

"19598"|"Clonazepam 0.5 MG Oral Tablet"|"76343"|"Bipolar I Disorder, Most Recent Episode, Depressed - Moderate"|"2"|"0.666667"

"19598"|"Clonazepam 0.5 MG Oral Tablet"|"76352"|"Major Depression, Single Episode"|"2"|"0.4"

"19598"|"Clonazepam 0.5 MG Oral Tablet"|"76357"|"Major Depression, Recurrent"|"11"|"0.289474"

"19598"|"Clonazepam 0.5 MG Oral Tablet"|"76361"|"Moderate Recurrent Major Depression"|"3"|"0.157895"

"19598"|"Clonazepam 0.5 MG Oral Tablet"|"76363"|"Major Depression, Recurrent With Psychotic Features"|"4"|"0.666667"

"19598"|"Clonazepam 0.5 MG Oral Tablet"|"76388"|"Bipolar Disorder NOS"|"4"|"0.307692"

"19598"|"Clonazepam 0.5 MG Oral Tablet"|"76395"|"Primary Insomnia"|"2"|"0.5"

"19598"|"Clonazepam 0.5 MG Oral Tablet"|"76414"|"REM Sleep Behavior Syndrome"|"7"|"0.636364"

"19598"|"Clonazepam 0.5 MG Oral Tablet"|"76536"|"Generalized Anxiety Disorder"|"36"|"0.654545"

"19598"|"Clonazepam 0.5 MG Oral Tablet"|"76537"|"Panic Disorder Without Agoraphobia"|"24"|"0.631579"

"19598"|"Clonazepam 0.5 MG Oral Tablet"|"76538"|"Panic Disorder With Agoraphobia"|"12"|"0.666667"

"19598"|"Clonazepam 0.5 MG Oral Tablet"|"76541"|"Social Phobia"|"2"|"0.666667"

"19598"|"Clonazepam 0.5 MG Oral Tablet"|"76546"|"Obsessive Compulsive Disorder"|"3"|"0.214286"

"19598"|"Clonazepam 0.5 MG Oral Tablet"|"76548"|"Chronic Post-traumatic Stress Disorder"|"2"|"0.333333"

"19598"|"Clonazepam 0.5 MG Oral Tablet"|"76587"|"Anxiety Disorder NOS"|"27"|"0.586957"

"19598"|"Clonazepam 0.5 MG Oral Tablet"|"76680"|"Adjustment Disorder With Anxiety"|"13"|"0.65"

"19598"|"Clonazepam 0.5 MG Oral Tablet"|"163664"|"Mood Irritable"|"2"|"1"

"19598"|"Clonazepam 0.5 MG Oral Tablet"|"165548"|"Tremor"|"3"|"0.214286"

"19598"|"Clonazepam 0.5 MG Oral Tablet"|"165611"|"Myoclonus"|"2"|"0.25"

"19598"|"Clonazepam 0.5 MG Oral Tablet"|"196089"|"Adjustment Disorder With Anxiety And Depressed Mood"|"8"|"0.666667"  
"19598"|"Clonazepam 0.5 MG Oral Tablet"|"201177"|"Quadriplegic Cerebral Palsy With Spasticity"|"2"|"0.25"  
"19598"|"Clonazepam 0.5 MG Oral Tablet"|"252551"|"Generalized Convulsive Tonic-clonic Seizure"|"2"|"0.666667"  
"19598"|"Clonazepam 0.5 MG Oral Tablet"|"252576"|"Focal Torsion Dystonia"|"3"|"0.6"  
"19598"|"Clonazepam 0.5 MG Oral Tablet"|"252581"|"Idiopathic Dystonia Musculorum Deformans"|"2"|"1"  
"19598"|"Clonazepam 0.5 MG Oral Tablet"|"275496"|"Autistic Disorder"|"2"|"0.25"  
"19598"|"Clonazepam 0.5 MG Oral Tablet"|"275526"|"Severe Recurrent Major Depression Without Psychotic Features"|"2"|"0.333333"  
"19598"|"Clonazepam 0.5 MG Oral Tablet"|"275590"|"Organic REM Sleep Behavior Disorder"|"2"|"1"  
"19598"|"Clonazepam 0.5 MG Oral Tablet"|"275592"|"Post-traumatic Stress Disorder"|"9"|"0.321429"  
"19598"|"Clonazepam 0.5 MG Oral Tablet"|"275602"|"Organic Periodic Limb Movement Sleep Disorder"|"2"|"0.333333"  
"19598"|"Clonazepam 0.5 MG Oral Tablet"|"275604"|"Depression With Anxiety"|"3"|"0.333333"  
"19598"|"Clonazepam 0.5 MG Oral Tablet"|"288830"|"Orofacial Dyskinesia"|"3"|"1"  
"19598"|"Clonazepam 0.5 MG Oral Tablet"|"288856"|"Spasms"|"2"|"0.333333"  
"19598"|"Clonazepam 0.5 MG Oral Tablet"|"292509"|"Multisystem Atrophy"|"2"|"0.285714"  
"19598"|"Clonazepam 0.5 MG Oral Tablet"|"297231"|"Epilepsy"|"2"|"0.25"  
"19603"|"Cyclophosphamide 25 MG Oral Tablet"|"70475"|"Scleroderma"|"3"|"0.6"  
"19606"|"Desmopressin Acetate 4 MCG/ML Injection Solution"|"69542"|"Central Diabetes Insipidus"|"2"|"1"  
"19607"|"Desonide 0.05 % External Ointment"|"278350"|"Eczema"|"3"|"0.6"  
"19640"|"Phenazopyridine HCl 100 MG Oral Tablet"|"60928"|"Pain During Urination (Dysuria)"|"3"|"0.5"  
"19640"|"Phenazopyridine HCl 100 MG Oral Tablet"|"65753"|"Acute Cystitis"|"2"|"0.666667"  
"19640"|"Phenazopyridine HCl 100 MG Oral Tablet"|"65762"|"Urinary Tract Infection"|"12"|"0.75"  
"19641"|"Phenazopyridine HCl 200 MG Oral Tablet"|"60928"|"Pain During Urination (Dysuria)"|"7"|"0.7"  
"19641"|"Phenazopyridine HCl 200 MG Oral Tablet"|"65762"|"Urinary Tract Infection"|"14"|"0.518519"  
"19641"|"Phenazopyridine HCl 200 MG Oral Tablet"|"65856"|"Urethral Stricture"|"3"|"0.6"  
"19651"|"PHENobarbital 20 MG/5ML Oral Elixir"|"61040"|"Convulsions"|"3"|"0.3"  
"19651"|"PHENobarbital 20 MG/5ML Oral Elixir"|"67888"|"Convulsions In Newborn"|"3"|"0.272727"  
"19651"|"PHENobarbital 20 MG/5ML Oral Elixir"|"74988"|"Seizure Disorder"|"38"|"0.558824"  
"19651"|"PHENobarbital 20 MG/5ML Oral Elixir"|"297231"|"Epilepsy"|"2"|"0.5"  
"19652"|"PHENobarbital 100 MG Oral Tablet"|"74988"|"Seizure Disorder"|"3"|"0.428571"  
"19652"|"PHENobarbital 100 MG Oral Tablet"|"297231"|"Epilepsy"|"2"|"1"  
"19653"|"PHENobarbital 30 MG Oral Tablet"|"74988"|"Seizure Disorder"|"10"|"0.47619"  
"19654"|"PHENobarbital 32.4 MG Oral Tablet"|"74988"|"Seizure Disorder"|"2"|"1"  
"19655"|"PHENobarbital 60 MG Oral Tablet"|"252546"|"Generalized Convulsive Seizure"|"3"|"1"  
"19656"|"PHENobarbital 64.8 MG Oral Tablet"|"74988"|"Seizure Disorder"|"2"|"0.2"  
"19657"|"PHENobarbital 97.2 MG Oral Tablet"|"74988"|"Seizure Disorder"|"2"|"0.666667"  
"19663"|"Phentermine HCl 37.5 MG Oral Tablet"|"68102"|"Overweight"|"2"|"1"  
"19663"|"Phentermine HCl 37.5 MG Oral Tablet"|"283296"|"Abnormal Weight Gain"|"5"|"0.625"  
"19665"|"Estradiol 1 MG Oral Tablet"|"66073"|"Menopause"|"7"|"0.636364"  
"19665"|"Estradiol 1 MG Oral Tablet"|"66076"|"Menopausal Disorder"|"6"|"0.545455"  
"19665"|"Estradiol 1 MG Oral Tablet"|"69551"|"Ovarian Failure"|"4"|"1"  
"19665"|"Estradiol 1 MG Oral Tablet"|"167200"|"Premature Menopause"|"5"|"0.714286"  
"19665"|"Estradiol 1 MG Oral Tablet"|"195794"|"Symptomatic Menopause"|"7"|"0.7"  
"19666"|"Estradiol 2 MG Oral Tablet"|"66274"|"Female Infertility"|"2"|"1"  
"19666"|"Estradiol 2 MG Oral Tablet"|"195794"|"Symptomatic Menopause"|"2"|"0.666667"  
"19668"|"Ethambutol HCl 400 MG Oral Tablet"|"77275"|"Tuberculosis"|"2"|"0.333333"  
"19668"|"Ethambutol HCl 400 MG Oral Tablet"|"77650"|"Atypical Mycobacterial Infection"|"2"|"0.4"  
"19670"|"Famotidine 20 MG Oral Tablet"|"60891"|"Heartburn"|"19"|"0.904762"  
"19670"|"Famotidine 20 MG Oral Tablet"|"60899"|"Abdominal Pain"|"12"|"0.428571"  
"19670"|"Famotidine 20 MG Oral Tablet"|"62984"|"Atypical Chest Pain"|"4"|"0.25"  
"19670"|"Famotidine 20 MG Oral Tablet"|"64680"|"Chronic Reflux Esophagitis"|"7"|"0.538462"  
"19670"|"Famotidine 20 MG Oral Tablet"|"64688"|"Esophageal Reflux"|"46"|"0.589744"

"19670"|"Famotidine 20 MG Oral Tablet"|"64763"|"Gastritis"|"8"|"0.5"  
"19670"|"Famotidine 20 MG Oral Tablet"|"65674"|"Nephrotic Syndrome"|"2"|"0.4"  
"19670"|"Famotidine 20 MG Oral Tablet"|"116196"|"Abdomen Tenderness Direct Epigastric"|"2"|"0.4"  
"19670"|"Famotidine 20 MG Oral Tablet"|"258010"|"Allergic Reaction"|"2"|"1"  
"19670"|"Famotidine 20 MG Oral Tablet"|"274611"|"Nephritis Due To SLE"|"2"|"0.666667"  
"19670"|"Famotidine 20 MG Oral Tablet"|"276379"|"Heartburn With Regurgitation"|"2"|"1"  
"19670"|"Famotidine 20 MG Oral Tablet"|"282704"|"Acute Gastritis"|"4"|"0.571429"  
"19673"|"Gentamicin Sulfate Powder"|"62588"|"Chronic Ethmoidal Sinusitis"|"2"|"0.5"  
"19674"|"GlyBURIDE 1.25 MG Oral Tablet"|"69380"|"Diabetes Mellitus"|"5"|"0.625"  
"19678"|"Haloperidol Decanoate 50 MG/ML Intramuscular Solution"|"76232"|"Paranoid Schizophrenia"|"2"|"1"  
"19693"|"Hydroquinone 4 % External Cream"|"93705"|"Dermatitis"|"2"|"0.666667"  
"19693"|"Hydroquinone 4 % External Cream"|"246990"|"Dyschromia"|"3"|"1"  
"19693"|"Hydroquinone 4 % External Cream"|"250903"|"Varicose Veins With Pain"|"2"|"0.666667"  
"19694"|"Hydroxychloroquine Sulfate 200 MG Oral Tablet"|"67760"|"Connective Tissue Defect"|"3"|"1"  
"19694"|"Hydroxychloroquine Sulfate 200 MG Oral Tablet"|"69731"|"Chronic Lupus Erythematosus"|"3"|"0.333333"  
"19694"|"Hydroxychloroquine Sulfate 200 MG Oral Tablet"|"69732"|"Discoid Lupus Erythematosus"|"4"|"0.363636"  
"19694"|"Hydroxychloroquine Sulfate 200 MG Oral Tablet"|"69824"|"Morphea (Localized Scleroderma)"|"2"|"0.666667"  
"19694"|"Hydroxychloroquine Sulfate 200 MG Oral Tablet"|"70455"|"Rheumatoid Arthritis"|"74"|"0.778947"  
"19694"|"Hydroxychloroquine Sulfate 200 MG Oral Tablet"|"70461"|"Juvenile Rheumatoid Arthritis"|"2"|"1"  
"19694"|"Hydroxychloroquine Sulfate 200 MG Oral Tablet"|"70472"|"Systemic Lupus Erythematosus"|"158"|"0.840426"  
"19694"|"Hydroxychloroquine Sulfate 200 MG Oral Tablet"|"70474"|"Mixed Connective Tissue Disease"|"3"|"0.428571"  
"19694"|"Hydroxychloroquine Sulfate 200 MG Oral Tablet"|"70475"|"Scleroderma"|"21"|"0.617647"  
"19694"|"Hydroxychloroquine Sulfate 200 MG Oral Tablet"|"70477"|"Scleroderma With Pulmonary Involvement"|"3"|"0.6"  
"19694"|"Hydroxychloroquine Sulfate 200 MG Oral Tablet"|"70478"|"Sjogren's Syndrome"|"50"|"0.675676"  
"19694"|"Hydroxychloroquine Sulfate 200 MG Oral Tablet"|"70479"|"Sicca Syndrome"|"9"|"0.529412"  
"19694"|"Hydroxychloroquine Sulfate 200 MG Oral Tablet"|"70550"|"Relapsing Polychondritis"|"2"|"1"  
"19694"|"Hydroxychloroquine Sulfate 200 MG Oral Tablet"|"70598"|"Polymyositis / Dermatomyositis"|"7"|"0.875"  
"19694"|"Hydroxychloroquine Sulfate 200 MG Oral Tablet"|"70600"|"Typical Dermatomyositis (Type II)"|"4"|"0.8"  
"19694"|"Hydroxychloroquine Sulfate 200 MG Oral Tablet"|"70602"|"Childhood Dermatomyositis (Type IV)"|"4"|"1"  
"19694"|"Hydroxychloroquine Sulfate 200 MG Oral Tablet"|"70703"|"Asymmetrical Polyarticular Inflammation"|"3"|"0.6"  
"19694"|"Hydroxychloroquine Sulfate 200 MG Oral Tablet"|"70704"|"Symmetric Polyarticular Inflammation"|"13"|"0.722222"  
"19694"|"Hydroxychloroquine Sulfate 200 MG Oral Tablet"|"74290"|"Palindromic Rheumatism"|"2"|"0.666667"  
"19694"|"Hydroxychloroquine Sulfate 200 MG Oral Tablet"|"74299"|"Palindromic Rheumatism Of Multiple Sites"|"2"|"1"  
"19694"|"Hydroxychloroquine Sulfate 200 MG Oral Tablet"|"78050"|"Antiphospholipid Syndrome"|"3"|"0.428571"  
"19694"|"Hydroxychloroquine Sulfate 200 MG Oral Tablet"|"257996"|"Arthritis"|"4"|"0.148148"  
"19694"|"Hydroxychloroquine Sulfate 200 MG Oral Tablet"|"274611"|"Nephritis Due To SLE"|"6"|"0.206897"  
"19694"|"Hydroxychloroquine Sulfate 200 MG Oral Tablet"|"278685"|"Arthralgias In Multiple Sites"|"4"|"0.210526"  
"19694"|"Hydroxychloroquine Sulfate 200 MG Oral Tablet"|"288977"|"Fibromyalgia"|"3"|"0.130435"  
"19694"|"Hydroxychloroquine Sulfate 200 MG Oral Tablet"|"296649"|"Diffuse Connective Tissue Disorder"|"7"|"0.875"  
"19695"|"Hydroxyurea 500 MG Oral Capsule"|"78011"|"Sickle Cell Anemia"|"4"|"0.5"  
"19695"|"Hydroxyurea 500 MG Oral Capsule"|"78035"|"Sickle Cell Hb-SS Disease"|"15"|"0.833333"  
"19696"|"Hyoscyamine 0.15 MG TABS"|"65076"|"Irritable Bowel Syndrome"|"3"|"1"  
"19698"|"Ibuprofen 100 MG/5ML Oral Suspension"|"62403"|"Otitis Media Of The Left Ear"|"2"|"0.285714"  
"19698"|"Ibuprofen 100 MG/5ML Oral Suspension"|"62760"|"Acute Pharyngitis"|"2"|"0.5"  
"19698"|"Ibuprofen 100 MG/5ML Oral Suspension"|"77891"|"Acute Upper Respiratory Infection"|"3"|"0.125"  
"19698"|"Ibuprofen 100 MG/5ML Oral Suspension"|"78008"|"Sickle Cell Hb-SC Disease"|"2"|"0.5"

"19698"|"Ibuprofen 100 MG/5ML Oral Suspension"|"78035"|"Sickle Cell Hb-SS Disease"|"4"|"1"  
"19698"|"Ibuprofen 100 MG/5ML Oral Suspension"|"85614"|"Joint Pain, Localized In The Hip"|"2"|"0.666667"  
"19698"|"Ibuprofen 100 MG/5ML Oral Suspension"|"288959"|"Pyrexia"|"3"|"1"  
"19700"|"Indapamide 1.25 MG Oral Tablet"|"63467"|"Hypertension"|"2"|"0.285714"  
"19703"|"Ketorolac Tromethamine 10 MG Oral Tablet"|"60899"|"Abdominal Pain"|"2"|"0.5"  
"19703"|"Ketorolac Tromethamine 10 MG Oral Tablet"|"75728"|"Sciatica"|"2"|"0.666667"  
"19703"|"Ketorolac Tromethamine 10 MG Oral Tablet"|"75811"|"Muscle Spasm"|"2"|"1"  
"19704"|"Labetalol HCl 100 MG Oral Tablet"|"63467"|"Hypertension"|"17"|"0.414634"  
"19704"|"Labetalol HCl 100 MG Oral Tablet"|"63468"|"Essential Hypertension"|"3"|"0.1875"  
"19704"|"Labetalol HCl 100 MG Oral Tablet"|"63470"|"Benign Essential Hypertension"|"4"|"0.285714"  
"19704"|"Labetalol HCl 100 MG Oral Tablet"|"66386"|"Pregnancy Complicated By Hypertension - Antepartum Condition Or Prior Complicated Delivery"|"2"|"1"  
"19705"|"Labetalol HCl 200 MG Oral Tablet"|"62975"|"Coronary Artery Disease"|"2"|"0.222222"  
"19705"|"Labetalol HCl 200 MG Oral Tablet"|"63467"|"Hypertension"|"20"|"0.322581"  
"19705"|"Labetalol HCl 200 MG Oral Tablet"|"63468"|"Essential Hypertension"|"14"|"0.466667"  
"19705"|"Labetalol HCl 200 MG Oral Tablet"|"63470"|"Benign Essential Hypertension"|"7"|"0.411765"  
"19705"|"Labetalol HCl 200 MG Oral Tablet"|"65689"|"Nephrosclerosis With Benign Hypertension"|"2"|"1"  
"19705"|"Labetalol HCl 200 MG Oral Tablet"|"66386"|"Pregnancy Complicated By Hypertension - Antepartum Condition Or Prior Complicated Delivery"|"2"|"0.5"  
"19706"|"Labetalol HCl 300 MG Oral Tablet"|"63467"|"Hypertension"|"9"|"0.375"  
"19706"|"Labetalol HCl 300 MG Oral Tablet"|"63468"|"Essential Hypertension"|"6"|"0.5"  
"19706"|"Labetalol HCl 300 MG Oral Tablet"|"63470"|"Benign Essential Hypertension"|"2"|"0.5"  
"19706"|"Labetalol HCl 300 MG Oral Tablet"|"66386"|"Pregnancy Complicated By Hypertension - Antepartum Condition Or Prior Complicated Delivery"|"2"|"1"  
"19707"|"Levothyroxine Sodium 88 MCG Oral Tablet"|"69214"|"Hypopituitarism"|"4"|"0.5"  
"19707"|"Levothyroxine Sodium 88 MCG Oral Tablet"|"69258"|"Hypothyroidism"|"134"|"0.694301"  
"19707"|"Levothyroxine Sodium 88 MCG Oral Tablet"|"69259"|"Primary Hypothyroidism"|"7"|"0.538462"  
"19707"|"Levothyroxine Sodium 88 MCG Oral Tablet"|"69260"|"Hypothyroidism Postablative"|"2"|"1"  
"19707"|"Levothyroxine Sodium 88 MCG Oral Tablet"|"69262"|"Post Radio-iodine Therapy Hypothyroidism"|"2"|"0.5"  
"19707"|"Levothyroxine Sodium 88 MCG Oral Tablet"|"69266"|"Congenital Hypothyroidism"|"16"|"0.8"  
"19707"|"Levothyroxine Sodium 88 MCG Oral Tablet"|"69283"|"Hashimoto's Thyroiditis"|"3"|"0.6"  
"19707"|"Levothyroxine Sodium 88 MCG Oral Tablet"|"168206"|"Subclinical Hypothyroidism"|"2"|"0.5"  
"19707"|"Levothyroxine Sodium 88 MCG Oral Tablet"|"247286"|"Thyroid Function Tests Nonspecific Abnormal Findings"|"3"|"1"  
"19708"|"Levothyroxine Sodium 112 MCG Oral Tablet"|"69214"|"Hypopituitarism"|"2"|"0.5"  
"19708"|"Levothyroxine Sodium 112 MCG Oral Tablet"|"69258"|"Hypothyroidism"|"111"|"0.735099"  
"19708"|"Levothyroxine Sodium 112 MCG Oral Tablet"|"69260"|"Hypothyroidism Postablative"|"4"|"0.8"  
"19708"|"Levothyroxine Sodium 112 MCG Oral Tablet"|"69262"|"Post Radio-iodine Therapy Hypothyroidism"|"2"|"0.333333"  
"19708"|"Levothyroxine Sodium 112 MCG Oral Tablet"|"69263"|"Secondary Hypothyroidism"|"2"|"0.666667"  
"19708"|"Levothyroxine Sodium 112 MCG Oral Tablet"|"69266"|"Congenital Hypothyroidism"|"8"|"0.727273"  
"19709"|"Levothyroxine Sodium 175 MCG Oral Tablet"|"69234"|"Graves' Disease"|"3"|"0.6"  
"19709"|"Levothyroxine Sodium 175 MCG Oral Tablet"|"69258"|"Hypothyroidism"|"59"|"0.694118"  
"19709"|"Levothyroxine Sodium 175 MCG Oral Tablet"|"69261"|"Postsurgical Primary Hypothyroidism"|"6"|"0.75"  
"19709"|"Levothyroxine Sodium 175 MCG Oral Tablet"|"69269"|"Iatrogenic Hypothyroidism"|"2"|"0.4"  
"19718"|"Phenytoin Sodium Extended 100 MG Oral Capsule"|"61040"|"Convulsions"|"8"|"0.615385"  
"19718"|"Phenytoin Sodium Extended 100 MG Oral Capsule"|"74988"|"Seizure Disorder"|"38"|"0.481013"  
"19718"|"Phenytoin Sodium Extended 100 MG Oral Capsule"|"74989"|"Generalized Convulsive Grand Mal Seizure"|"6"|"0.6"  
"19718"|"Phenytoin Sodium Extended 100 MG Oral Capsule"|"74990"|"Convulsive Grand Mal Seizure With Intractable Seizure"|"3"|"0.5"  
"19718"|"Phenytoin Sodium Extended 100 MG Oral Capsule"|"75002"|"Partial Complex Psychomotor Seizure With Intractable Seizure"|"6"|"0.6"  
"19718"|"Phenytoin Sodium Extended 100 MG Oral Capsule"|"75486"|"Trigeminal Neuralgia"|"3"|"1"

"19718""Phenytoin Sodium Extended 100 MG Oral Capsule""252546""Generalized Convulsive Seizure""8""0.470588"  
"19718""Phenytoin Sodium Extended 100 MG Oral Capsule""252547""Generalized Convulsive Clonic Seizure""3""0.6"  
"19718""Phenytoin Sodium Extended 100 MG Oral Capsule""252550""Generalized Convulsive Tonic Seizure With Intractable Seizure""2""0.666667"  
"19718""Phenytoin Sodium Extended 100 MG Oral Capsule""252551""Generalized Convulsive Tonic-clonic Seizure""2""0.666667"  
"19718""Phenytoin Sodium Extended 100 MG Oral Capsule""252552""Generalized Convulsive Tonic-clonic Seizure With Intractable Seizure""3""0.6"  
"19718""Phenytoin Sodium Extended 100 MG Oral Capsule""252566""Partial Complex Seizure""8""0.615385"  
"19718""Phenytoin Sodium Extended 100 MG Oral Capsule""252569""Partial Complex Seizure With Secondary Generalization""4""0.8"  
"19718""Phenytoin Sodium Extended 100 MG Oral Capsule""288824""Convulsive Disorder""3""0.428571"  
"19718""Phenytoin Sodium Extended 100 MG Oral Capsule""297231""Epilepsy""7""0.583333"  
"19740""Piroxicam 10 MG Oral Capsule""91089""Lower Back Pain""2""1"  
"19746""Plaquenil 200 MG Oral Tablet""70455""Rheumatoid Arthritis""15""0.652174"  
"19746""Plaquenil 200 MG Oral Tablet""70472""Systemic Lupus Erythematosus""24""0.571429"  
"19746""Plaquenil 200 MG Oral Tablet""70475""Scleroderma""2""0.4"  
"19746""Plaquenil 200 MG Oral Tablet""70478""Sjogren's Syndrome""4""0.25"  
"19746""Plaquenil 200 MG Oral Tablet""70600""Typical Dermatomyositis (Type II)""2""1"  
"19802""Mebendazole 100 MG Oral Tablet Chewable""69897""Pruritus Ani""3""0.6"  
"19802""Mebendazole 100 MG Oral Tablet Chewable""77741""Enterobiasis (Pinworm)""9""0.75"  
"19827""Propoxyphene N-APAP 100-650 MG TABS""60899""Abdominal Pain""3""0.214286"  
"19827""Propoxyphene N-APAP 100-650 MG TABS""62614""Deviated Nasal Septum (Acquired)""2""0.333333"  
"19827""Propoxyphene N-APAP 100-650 MG TABS""65354""Chronic Pancreatitis""2""1"  
"19827""Propoxyphene N-APAP 100-650 MG TABS""70193""Localized Osteoarthritis Of The Knee""2""1"  
"19827""Propoxyphene N-APAP 100-650 MG TABS""70455""Rheumatoid Arthritis""7""0.411765"  
"19827""Propoxyphene N-APAP 100-650 MG TABS""74534""Classic Migraine (With Aura)""2""0.25"  
"19827""Propoxyphene N-APAP 100-650 MG TABS""85633""Pain In The Leg (Below The Knee)""2""0.5"  
"19827""Propoxyphene N-APAP 100-650 MG TABS""85644""Foot Pain (Soft Tissue)""3""0.25"  
"19827""Propoxyphene N-APAP 100-650 MG TABS""91079""Midback Pain""2""0.666667"  
"19827""Propoxyphene N-APAP 100-650 MG TABS""91089""Lower Back Pain""4""0.25"  
"19827""Propoxyphene N-APAP 100-650 MG TABS""257996""Arthritis""4""0.129032"  
"19827""Propoxyphene N-APAP 100-650 MG TABS""288933""Peripheral Neuropathy""5""0.333333"  
"19827""Propoxyphene N-APAP 100-650 MG TABS""288977""Fibromyalgia""2""0.25"  
"19830""Ranitidine HCl 150 MG Oral Tablet""60891""Heartburn""2""0.666667"  
"19830""Ranitidine HCl 150 MG Oral Tablet""60899""Abdominal Pain""6""0.352941"  
"19830""Ranitidine HCl 150 MG Oral Tablet""62984""Atypical Chest Pain""2""0.222222"  
"19830""Ranitidine HCl 150 MG Oral Tablet""64688""Esophageal Reflux""26""0.619048"  
"19830""Ranitidine HCl 150 MG Oral Tablet""69941""Urticaria""2""1"  
"19833""Rifampin 300 MG Oral Capsule""69968""Carbuncle""4""1"  
"19833""Rifampin 300 MG Oral Capsule""69999""Cellulitis""11""0.647059"  
"19833""Rifampin 300 MG Oral Capsule""70011""Cellulitis Of The Buttocks""3""0.75"  
"19833""Rifampin 300 MG Oral Capsule""70027""Folliculitis""3""0.333333"  
"19833""Rifampin 300 MG Oral Capsule""70029""Furuncle""3""0.75"  
"19833""Rifampin 300 MG Oral Capsule""70080""Skin Abscess""2""0.333333"  
"19833""Rifampin 300 MG Oral Capsule""70088""Skin Abscess Of The Groin""2""0.666667"  
"19833""Rifampin 300 MG Oral Capsule""74027""Osteomyelitis""7""0.875"  
"19833""Rifampin 300 MG Oral Capsule""77275""Tuberculosis""3""0.428571"  
"19833""Rifampin 300 MG Oral Capsule""77403""Latent Tuberculosis""5""0.714286"  
"19833""Rifampin 300 MG Oral Capsule""77650""Atypical Mycobacterial Infection""2""0.666667"  
"19833""Rifampin 300 MG Oral Capsule""278472""Pustular Folliculitis""2""0.666667"  
"19833""Rifampin 300 MG Oral Capsule""278552""Furunculosis""3""1"

"19840"|"Spironolactone 100 MG Oral Tablet"|"63467"|"Hypertension"|"3"|"0.15"  
"19840"|"Spironolactone 100 MG Oral Tablet"|"65286"|"Cirrhosis"|"5"|"0.454545"  
"19840"|"Spironolactone 100 MG Oral Tablet"|"69508"|"Aldosteronism"|"2"|"0.666667"  
"19840"|"Spironolactone 100 MG Oral Tablet"|"69549"|"Polycystic Ovarian Syndrome"|"8"|"0.571429"  
"19840"|"Spironolactone 100 MG Oral Tablet"|"288796"|"Premenstrual Syndromes"|"2"|"1"  
"19841"|"Spironolactone 50 MG Oral Tablet"|"63217"|"Congestive Heart Failure"|"5"|"0.263158"  
"19841"|"Spironolactone 50 MG Oral Tablet"|"63467"|"Hypertension"|"8"|"0.137931"  
"19841"|"Spironolactone 50 MG Oral Tablet"|"63468"|"Essential Hypertension"|"4"|"0.2"  
"19841"|"Spironolactone 50 MG Oral Tablet"|"69194"|"Endocrine Disorder"|"9"|"0.9"  
"19841"|"Spironolactone 50 MG Oral Tablet"|"69549"|"Polycystic Ovarian Syndrome"|"40"|"0.740741"  
"19841"|"Spironolactone 50 MG Oral Tablet"|"69606"|"Acne"|"4"|"0.5"  
"19841"|"Spironolactone 50 MG Oral Tablet"|"69607"|"Acne Vulgaris"|"2"|"1"  
"19841"|"Spironolactone 50 MG Oral Tablet"|"138023"|"Alopecia"|"6"|"0.857143"  
"19841"|"Spironolactone 50 MG Oral Tablet"|"278396"|"Hirsutism"|"4"|"0.5"  
"19846"|"Tretinoin 0.05 % External Cream"|"69606"|"Acne"|"3"|"0.6"  
"19847"|"Tretinoin 0.1 % External Cream"|"69606"|"Acne"|"3"|"0.6"  
"19892"|"Tessalon Perles 100 MG Oral Capsule"|"60869"|"Cough"|"4"|"0.363636"  
"19909"|"Phenex-2 Oral Powder"|"75807"|"Phenylketonuria"|"5"|"1"  
"19935"|"Potassium Chloride 20 MEQ/15ML (10%) Oral Liquid"|"63470"|"Benign Essential Hypertension"|"2"|"0.666667"  
"19935"|"Potassium Chloride 20 MEQ/15ML (10%) Oral Liquid"|"68089"|"Hypokalemia"|"2"|"0.666667"  
"19945"|"Povidone-Iodine 10 % External Solution"|"62588"|"Chronic Ethmoidal Sinusitis"|"2"|"0.5"  
"19960"|"PredniSONE 1 MG Oral Tablet"|"70455"|"Rheumatoid Arthritis"|"38"|"0.808511"  
"19960"|"PredniSONE 1 MG Oral Tablet"|"70472"|"Systemic Lupus Erythematosus"|"18"|"0.666667"  
"19960"|"PredniSONE 1 MG Oral Tablet"|"70475"|"Scleroderma"|"2"|"0.666667"  
"19960"|"PredniSONE 1 MG Oral Tablet"|"70478"|"Sjogren's Syndrome"|"2"|"0.222222"  
"19960"|"PredniSONE 1 MG Oral Tablet"|"70500"|"Polymyalgia Rheumatica"|"31"|"0.815789"  
"19960"|"PredniSONE 1 MG Oral Tablet"|"70550"|"Relapsing Polychondritis"|"3"|"0.75"  
"19960"|"PredniSONE 1 MG Oral Tablet"|"70598"|"Polymyositis / Dermatomyositis"|"3"|"0.75"  
"19960"|"PredniSONE 1 MG Oral Tablet"|"70600"|"Typical Dermatomyositis (Type II)"|"3"|"0.6"  
"19960"|"PredniSONE 1 MG Oral Tablet"|"70620"|"Sarcoidosis"|"3"|"0.75"  
"19960"|"PredniSONE 1 MG Oral Tablet"|"70638"|"Temporal Arteritis"|"3"|"0.75"  
"19960"|"PredniSONE 1 MG Oral Tablet"|"70703"|"Asymmetrical Polyarticular Inflammation"|"3"|"1"  
"19960"|"PredniSONE 1 MG Oral Tablet"|"70704"|"Symmetric Polyarticular Inflammation"|"4"|"0.571429"  
"19960"|"PredniSONE 1 MG Oral Tablet"|"75812"|"Myalgia And Myositis"|"2"|"0.666667"  
"19961"|"PredniSONE 20 MG Oral Tablet"|"60863"|"Difficulty Breathing (Dyspnea)"|"4"|"0.133333"  
"19961"|"PredniSONE 20 MG Oral Tablet"|"60869"|"Cough"|"12"|"0.166667"  
"19961"|"PredniSONE 20 MG Oral Tablet"|"60874"|"Wheezing"|"3"|"0.333333"  
"19961"|"PredniSONE 20 MG Oral Tablet"|"61040"|"Convulsions"|"2"|"0.5"  
"19961"|"PredniSONE 20 MG Oral Tablet"|"62578"|"Acute Sinusitis"|"7"|"0.21875"  
"19961"|"PredniSONE 20 MG Oral Tablet"|"64118"|"Acute Bronchitis"|"11"|"0.244444"  
"19961"|"PredniSONE 20 MG Oral Tablet"|"64180"|"Reactive Airway Disease"|"2"|"0.222222"  
"19961"|"PredniSONE 20 MG Oral Tablet"|"64181"|"Asthma"|"47"|"0.288344"  
"19961"|"PredniSONE 20 MG Oral Tablet"|"64184"|"Moderate Persistent Asthma"|"2"|"0.333333"  
"19961"|"PredniSONE 20 MG Oral Tablet"|"64205"|"Chronic Obstructive Pulmonary Disease"|"13"|"0.309524"  
"19961"|"PredniSONE 20 MG Oral Tablet"|"64223"|"Bronchiectasis"|"3"|"0.6"  
"19961"|"PredniSONE 20 MG Oral Tablet"|"64294"|"Pulmonary Fibrosis"|"4"|"0.363636"  
"19961"|"PredniSONE 20 MG Oral Tablet"|"64980"|"Crohn's Disease"|"3"|"0.375"  
"19961"|"PredniSONE 20 MG Oral Tablet"|"65041"|"Ulcerative Colitis"|"2"|"0.4"  
"19961"|"PredniSONE 20 MG Oral Tablet"|"65674"|"Nephrotic Syndrome"|"6"|"0.4"  
"19961"|"PredniSONE 20 MG Oral Tablet"|"65675"|"Nephrotic Syndrome Due To Minimal Change Glomerulonephritis"|"3"|"0.6"  
"19961"|"PredniSONE 20 MG Oral Tablet"|"69710"|"Contact Dermatitis"|"10"|"0.47619"  
"19961"|"PredniSONE 20 MG Oral Tablet"|"69731"|"Chronic Lupus Erythematosus"|"2"|"1"

"19961"|"PredniSONE 20 MG Oral Tablet"|"69941"|"Urticaria"|"3"|"0.375"  
"19961"|"PredniSONE 20 MG Oral Tablet"|"69942"|"Allergic Urticaria"|"8"|"0.5"  
"19961"|"PredniSONE 20 MG Oral Tablet"|"69948"|"Idiopathic Urticaria"|"3"|"0.75"  
"19961"|"PredniSONE 20 MG Oral Tablet"|"69950"|"Heat Urticaria"|"2"|"1"  
"19961"|"PredniSONE 20 MG Oral Tablet"|"70112"|"Atopic Dermatitis"|"3"|"0.166667"  
"19961"|"PredniSONE 20 MG Oral Tablet"|"70384"|"Gout"|"10"|"0.384615"  
"19961"|"PredniSONE 20 MG Oral Tablet"|"70386"|"Acute Gout"|"3"|"0.428571"  
"19961"|"PredniSONE 20 MG Oral Tablet"|"70387"|"Chronic Gout"|"2"|"0.4"  
"19961"|"PredniSONE 20 MG Oral Tablet"|"70472"|"Systemic Lupus Erythematosus"|"13"|"0.351351"  
"19961"|"PredniSONE 20 MG Oral Tablet"|"70475"|"Scleroderma"|"2"|"0.333333"  
"19961"|"PredniSONE 20 MG Oral Tablet"|"70477"|"Scleroderma With Pulmonary Involvement"|"2"|"0.666667"  
"19961"|"PredniSONE 20 MG Oral Tablet"|"70478"|"Sjogren's Syndrome"|"3"|"0.25"  
"19961"|"PredniSONE 20 MG Oral Tablet"|"70598"|"Polymyositis / Dermatomyositis:"|"6"|"0.75"  
"19961"|"PredniSONE 20 MG Oral Tablet"|"70599"|"Typical Polymyositis (Type I)"|"2"|"1"  
"19961"|"PredniSONE 20 MG Oral Tablet"|"70602"|"Childhood Dermatomyositis (Type IV)"|"2"|"1"  
"19961"|"PredniSONE 20 MG Oral Tablet"|"70620"|"Sarcoidosis"|"11"|"0.458333"  
"19961"|"PredniSONE 20 MG Oral Tablet"|"70637"|"Vasculitides"|"3"|"0.3"  
"19961"|"PredniSONE 20 MG Oral Tablet"|"70638"|"Temporal Arteritis"|"5"|"1"  
"19961"|"PredniSONE 20 MG Oral Tablet"|"70640"|"Wegener's Granulomatosis"|"2"|"0.666667"  
"19961"|"PredniSONE 20 MG Oral Tablet"|"70642"|"Microscopic Polyarteritis Nodosa"|"2"|"0.666667"  
"19961"|"PredniSONE 20 MG Oral Tablet"|"70645"|"Henoch-Schonlein Purpura"|"2"|"0.666667"  
"19961"|"PredniSONE 20 MG Oral Tablet"|"70648"|"Behcet's Syndrome"|"3"|"1"  
"19961"|"PredniSONE 20 MG Oral Tablet"|"74640"|"Meningeal Sarcoidosis"|"4"|"0.666667"  
"19961"|"PredniSONE 20 MG Oral Tablet"|"75124"|"Demyelinating Disorders"|"3"|"0.3"  
"19961"|"PredniSONE 20 MG Oral Tablet"|"75500"|"Bell's Palsy"|"8"|"0.8"  
"19961"|"PredniSONE 20 MG Oral Tablet"|"75617"|"Chronic Inflammatory Demyelinating Polyneuropathy"|"2"|"0.285714"  
"19961"|"PredniSONE 20 MG Oral Tablet"|"75728"|"Sciatica"|"2"|"0.25"  
"19961"|"PredniSONE 20 MG Oral Tablet"|"75733"|"Myasthenia Gravis"|"2"|"0.333333"  
"19961"|"PredniSONE 20 MG Oral Tablet"|"76794"|"Herpes Zoster (Shingles)"|"3"|"0.3"  
"19961"|"PredniSONE 20 MG Oral Tablet"|"87060"|"Hoarseness"|"2"|"0.25"  
"19961"|"PredniSONE 20 MG Oral Tablet"|"88375"|"Skin: A Rash"|"6"|"0.315789"  
"19961"|"PredniSONE 20 MG Oral Tablet"|"90952"|"Joint Pain, Localized In The Left Shoulder"|"2"|"0.4"  
"19961"|"PredniSONE 20 MG Oral Tablet"|"91089"|"Lower Back Pain"|"3"|"0.107143"  
"19961"|"PredniSONE 20 MG Oral Tablet"|"93705"|"Dermatitis"|"4"|"0.363636"  
"19961"|"PredniSONE 20 MG Oral Tablet"|"166748"|"Asthma With Acute Exacerbation"|"17"|"0.447368"  
"19961"|"PredniSONE 20 MG Oral Tablet"|"173419"|"Cervical Radiculopathy"|"4"|"0.666667"  
"19961"|"PredniSONE 20 MG Oral Tablet"|"247012"|"Shortness Of Breath"|"4"|"0.16"  
"19961"|"PredniSONE 20 MG Oral Tablet"|"258010"|"Allergic Reaction"|"8"|"0.666667"  
"19961"|"PredniSONE 20 MG Oral Tablet"|"258835"|"Bronchitis"|"3"|"0.125"  
"19961"|"PredniSONE 20 MG Oral Tablet"|"274575"|"Glomerulonephritis"|"2"|"1"  
"19961"|"PredniSONE 20 MG Oral Tablet"|"274611"|"Nephritis Due To SLE"|"5"|"0.333333"  
"19961"|"PredniSONE 20 MG Oral Tablet"|"277913"|"Chronic Interstitial Lung Disease"|"2"|"0.222222"  
"19961"|"PredniSONE 20 MG Oral Tablet"|"278317"|"Dermatitis Due To Contact With Poison Ivy"|"7"|"0.875"  
"19961"|"PredniSONE 20 MG Oral Tablet"|"288804"|"Encephalitis"|"3"|"0.6"  
"19962"|"PredniSONE 50 MG Oral Tablet"|"64181"|"Asthma"|"2"|"0.285714"  
"19962"|"PredniSONE 50 MG Oral Tablet"|"75125"|"Multiple Sclerosis"|"14"|"0.777778"  
"19965"|"Premarin 1.25 MG Oral Tablet"|"69214"|"Hypopituitarism"|"3"|"1"  
"20054"|"Proctofoam HC 1-1 % Rectal Foam"|"65128"|"Hemorrhoids"|"7"|"0.4375"  
"20054"|"Proctofoam HC 1-1 % Rectal Foam"|"65134"|"Internal Hemorrhoids"|"5"|"1"  
"20054"|"Proctofoam HC 1-1 % Rectal Foam"|"65141"|"External Hemorrhoids"|"8"|"0.8"  
"20054"|"Proctofoam HC 1-1 % Rectal Foam"|"65142"|"Thrombosed External Hemorrhoids"|"2"|"1"  
"20054"|"Proctofoam HC 1-1 % Rectal Foam"|"65150"|"Anal Fissure"|"8"|"0.727273"  
"20059"|"Progesterone 50 MG/ML Intramuscular Oil"|"66274"|"Female Infertility"|"2"|"0.666667"

"20059"|"Progesterone 50 MG/ML Intramuscular Oil"|"69549"|"Polycystic Ovarian Syndrome"|"2"|"0.5"  
"20070"|"Carafate 1 GM/10ML Oral Suspension"|"64688"|"Esophageal Reflux"|"4"|"0.266667"  
"20092"|"RisperDAL 3 MG Oral Tablet"|"76238"|"Paranoid Schizophrenia, Stable"|"2"|"1"  
"20093"|"RisperDAL 4 MG Oral Tablet"|"76234"|"Paranoid Schizophrenia, Chronic"|"2"|"1"  
"20095"|"Pulmozyme 1 MG/ML Inhalation Solution"|"32925"|"Chronic Respiratory Failure"|"3"|"0.428571"  
"20095"|"Pulmozyme 1 MG/ML Inhalation Solution"|"67695"|"Cystic Fibrosis"|"10"|"0.625"  
"20095"|"Pulmozyme 1 MG/ML Inhalation Solution"|"277913"|"Chronic Interstitial Lung Disease"|"2"|"0.666667"  
"20113"|"Potassium Chloride CR 10 MEQ Oral Tablet Extended Release"|"63217"|"Congestive Heart Failure"|"4"|"0.333333"  
"20113"|"Potassium Chloride CR 10 MEQ Oral Tablet Extended Release"|"63467"|"Hypertension"|"4"|"0.137931"  
"20113"|"Potassium Chloride CR 10 MEQ Oral Tablet Extended Release"|"63470"|"Benign Essential Hypertension"|"5"|"0.294118"  
"20113"|"Potassium Chloride CR 10 MEQ Oral Tablet Extended Release"|"68089"|"Hypokalemia"|"5"|"0.5"  
"20118"|"Tussionex Pennkinetic ER 10-8 MG/5ML Oral Liquid Extended Release"|"60869"|"Cough"|"7"|"0.35"  
"20118"|"Tussionex Pennkinetic ER 10-8 MG/5ML Oral Liquid Extended Release"|"77890"|"Upper Respiratory Infection"|"4"|"0.285714"  
"20208"|"Promethazine HCl 12.5 MG Oral Tablet"|"60894"|"Nausea (Symptom)"|"25"|"0.694444"  
"20208"|"Promethazine HCl 12.5 MG Oral Tablet"|"60895"|"Vomiting (Symptom)"|"3"|"0.6"  
"20208"|"Promethazine HCl 12.5 MG Oral Tablet"|"64579"|"Gastroenteritis"|"5"|"0.263158"  
"20208"|"Promethazine HCl 12.5 MG Oral Tablet"|"64610"|"Viral Gastroenteritis"|"5"|"0.454545"  
"20208"|"Promethazine HCl 12.5 MG Oral Tablet"|"64621"|"Infectious Gastroenteritis"|"2"|"1"  
"20208"|"Promethazine HCl 12.5 MG Oral Tablet"|"70477"|"Scleroderma With Pulmonary Involvement"|"2"|"1"  
"20208"|"Promethazine HCl 12.5 MG Oral Tablet"|"87702"|"Nausea With Vomiting"|"23"|"0.676471"  
"20208"|"Promethazine HCl 12.5 MG Oral Tablet"|"252601"|"Vertigo"|"4"|"0.4"  
"20208"|"Promethazine HCl 12.5 MG Oral Tablet"|"274406"|"Pregnancy Test Positive"|"2"|"0.666667"  
"20208"|"Promethazine HCl 12.5 MG Oral Tablet"|"282704"|"Acute Gastritis"|"3"|"0.6"  
"20211"|"Promethazine-Codeine 6.25-10 MG/5ML Oral Syrup"|"60869"|"Cough"|"3"|"0.333333"  
"20211"|"Promethazine-Codeine 6.25-10 MG/5ML Oral Syrup"|"64118"|"Acute Bronchitis"|"2"|"0.333333"  
"20211"|"Promethazine-Codeine 6.25-10 MG/5ML Oral Syrup"|"77891"|"Acute Upper Respiratory Infection"|"3"|"0.272727"  
"20211"|"Promethazine-Codeine 6.25-10 MG/5ML Oral Syrup"|"277914"|"Acute Bronchitis With Bronchospasm"|"2"|"0.666667"  
"20226"|"Propranolol HCl 20 MG Oral Tablet"|"60828"|"Headache"|"2"|"0.5"  
"20226"|"Propranolol HCl 20 MG Oral Tablet"|"63467"|"Hypertension"|"4"|"0.108108"  
"20226"|"Propranolol HCl 20 MG Oral Tablet"|"63468"|"Essential Hypertension"|"2"|"0.333333"  
"20226"|"Propranolol HCl 20 MG Oral Tablet"|"63470"|"Benign Essential Hypertension"|"2"|"0.2"  
"20226"|"Propranolol HCl 20 MG Oral Tablet"|"69231"|"Hyperthyroidism"|"6"|"0.6"  
"20226"|"Propranolol HCl 20 MG Oral Tablet"|"69234"|"Graves' Disease"|"8"|"0.727273"  
"20226"|"Propranolol HCl 20 MG Oral Tablet"|"74533"|"Migraine Headache"|"3"|"0.272727"  
"20226"|"Propranolol HCl 20 MG Oral Tablet"|"75104"|"Familial (Benign Essential) Tremor"|"5"|"0.625"  
"20226"|"Propranolol HCl 20 MG Oral Tablet"|"250579"|"Blood Pressure Isolated Elevated"|"2"|"0.4"  
"20227"|"Propranolol HCl 60 MG Oral Tablet"|"63468"|"Essential Hypertension"|"2"|"0.5"  
"20263"|"Pyridoxine HCl 25 MG Oral Tablet"|"77403"|"Latent Tuberculosis"|"2"|"0.666667"  
"20263"|"Pyridoxine HCl 25 MG Oral Tablet"|"87702"|"Nausea With Vomiting"|"3"|"0.6"  
"20263"|"Pyridoxine HCl 25 MG Oral Tablet"|"200624"|"Tuberculin PPD Induration Positive Interpretation"|"8"|"0.8"  
"20264"|"Pyridoxine HCl 50 MG Oral Tablet"|"77403"|"Latent Tuberculosis"|"9"|"0.692308"  
"20264"|"Pyridoxine HCl 50 MG Oral Tablet"|"94415"|"Exposed To Tuberculosis"|"2"|"0.666667"  
"20264"|"Pyridoxine HCl 50 MG Oral Tablet"|"200624"|"Tuberculin PPD Induration Positive Interpretation"|"5"|"0.625"  
"20304"|"DiphenhydrAMINE HCl 12.5 MG/5ML Oral Liquid"|"61029"|"Itching (Pruritus)"|"3"|"1"  
"20304"|"DiphenhydrAMINE HCl 12.5 MG/5ML Oral Liquid"|"62598"|"Allergic Rhinitis"|"10"|"0.294118"  
"20304"|"DiphenhydrAMINE HCl 12.5 MG/5ML Oral Liquid"|"64565"|"Upper Respiratory Tract Disorders"|"3"|"0.3"  
"20304"|"DiphenhydrAMINE HCl 12.5 MG/5ML Oral Liquid"|"70112"|"Atopic Dermatitis"|"8"|"0.32"  
"20304"|"DiphenhydrAMINE HCl 12.5 MG/5ML Oral Liquid"|"77704"|"Scabies"|"4"|"0.571429"

"20304"|"DiphenhydrAMINE HCl 12.5 MG/5ML Oral Liquid"|"81335"|"Multiple Nonvenomous Insect Bites"|"3"|"0.5"  
"20304"|"DiphenhydrAMINE HCl 12.5 MG/5ML Oral Liquid"|"83137"|"Nonvenomous Insect Bite"|"2"|"0.5"  
"20304"|"DiphenhydrAMINE HCl 12.5 MG/5ML Oral Liquid"|"278350"|"Eczema"|"7"|"0.269231"  
"20314"|"Ipratropium Bromide 0.02 % Inhalation Solution"|"60869"|"Cough"|"2"|"0.222222"  
"20314"|"Ipratropium Bromide 0.02 % Inhalation Solution"|"64181"|"Asthma"|"6"|"0.375"  
"20314"|"Ipratropium Bromide 0.02 % Inhalation Solution"|"64205"|"Chronic Obstructive Pulmonary Disease"|"14"|"0.7"  
"20314"|"Ipratropium Bromide 0.02 % Inhalation Solution"|"64210"|"Diffuse Obstructive Chronic Bronchitis"|"3"|"0.75"  
"20314"|"Ipratropium Bromide 0.02 % Inhalation Solution"|"64212"|"Emphysema"|"3"|"0.6"  
"20468"|"Retrovir 10 MG/ML Intravenous Solution"|"76835"|"HIV Infection"|"2"|"0.285714"  
"20468"|"Retrovir 10 MG/ML Intravenous Solution"|"94386"|"Exposed To HIV Infection"|"2"|"0.222222"  
"20490"|"Ritalin 10 MG Oral Tablet"|"75819"|"ADHD, Predominantly Inattentive Type"|"2"|"0.666667"  
"20490"|"Ritalin 10 MG Oral Tablet"|"275486"|"ADHD, Combined Type"|"2"|"0.666667"  
"20490"|"Ritalin 10 MG Oral Tablet"|"275492"|"ADHD, Predominantly Hyperactive - Impulsive"|"2"|"1"  
"20491"|"Ritalin 5 MG Oral Tablet"|"75818"|"Attention-deficit Hyperactivity Disorder"|"6"|"0.666667"  
"20598"|"Saline Nasal Spray 0.65 % Nasal Solution"|"62577"|"Sinusitis"|"4"|"0.571429"  
"20598"|"Saline Nasal Spray 0.65 % Nasal Solution"|"62598"|"Allergic Rhinitis"|"16"|"0.516129"  
"20598"|"Saline Nasal Spray 0.65 % Nasal Solution"|"62611"|"Chronic Rhinitis"|"2"|"0.666667"  
"20598"|"Saline Nasal Spray 0.65 % Nasal Solution"|"62616"|"Epistaxis"|"2"|"0.5"  
"20598"|"Saline Nasal Spray 0.65 % Nasal Solution"|"64565"|"Upper Respiratory Tract Disorders"|"4"|"0.2"  
"20598"|"Saline Nasal Spray 0.65 % Nasal Solution"|"77890"|"Upper Respiratory Infection"|"4"|"0.4"  
"20598"|"Saline Nasal Spray 0.65 % Nasal Solution"|"87028"|"Nasal Passage Blockage (Stuffiness)"|"5"|"0.384615"  
"20618"|"Milk of Magnesia 400 MG/5ML Oral Suspension"|"65055"|"Chronic Constipation"|"3"|"0.75"  
"20618"|"Milk of Magnesia 400 MG/5ML Oral Suspension"|"166777"|"Constipation"|"6"|"0.666667"  
"20638"|"Naproxen Sodium 220 MG Oral Tablet"|"257996"|"Arthritis"|"2"|"0.666667"  
"20638"|"Naproxen Sodium 220 MG Oral Tablet"|"278685"|"Arthralgias In Multiple Sites"|"2"|"0.666667"  
"20691"|"Senokot 8.6 MG Oral Tablet"|"166777"|"Constipation"|"2"|"0.666667"  
"20911"|"Simethicone 125 MG Oral Tablet Chewable"|"60905"|"Flatus"|"2"|"0.666667"  
"20964"|"Sodium Chloride 1 GM Oral Tablet"|"68085"|"Hyponatremia"|"3"|"0.6"  
"20984"|"Catapres-TTS-1 0.1 MG/24HR Transdermal Patch Weekly"|"63467"|"Hypertension"|"2"|"0.4"  
"20986"|"Diflucan 150 MG Oral Tablet"|"66214"|"Candida Albicans Vaginitis"|"2"|"1"  
"20994"|"Bisacodyl EC 5 MG Oral Tablet Delayed Release"|"166777"|"Constipation"|"10"|"0.5"  
"21069"|"Riboflavin 100 MG Oral Capsule"|"257912"|"Disorder Of Mitochondrial Metabolism"|"20"|"0.833333"  
"21160"|"OneTouch Test In Vitro Strip"|"69380"|"Diabetes Mellitus"|"10"|"0.25641"  
"21160"|"OneTouch Test In Vitro Strip"|"69381"|"Type II Diabetes Mellitus"|"8"|"0.296296"  
"21160"|"OneTouch Test In Vitro Strip"|"69382"|"Type II Diabetes Mellitus - Uncomplicated, Uncontrolled"|"2"|"0.285714"  
"21160"|"OneTouch Test In Vitro Strip"|"69387"|"Type I Diabetes Mellitus"|"3"|"0.5"  
"21160"|"OneTouch Test In Vitro Strip"|"69388"|"Type I Diabetes Mellitus - Uncontrolled"|"8"|"0.8"  
"21160"|"OneTouch Test In Vitro Strip"|"69402"|"Diabetes Mellitus Poorly Controlled"|"27"|"0.75"  
"21189"|"Levoxyl 100 MCG Oral Tablet"|"69258"|"Hypothyroidism"|"33"|"0.673469"  
"21190"|"Levoxyl 150 MCG Oral Tablet"|"69258"|"Hypothyroidism"|"23"|"0.821429"  
"21191"|"Levoxyl 200 MCG Oral Tablet"|"69258"|"Hypothyroidism"|"3"|"0.6"  
"21192"|"Levoxyl 88 MCG Oral Tablet"|"69258"|"Hypothyroidism"|"8"|"0.296296"  
"21192"|"Levoxyl 88 MCG Oral Tablet"|"69266"|"Congenital Hypothyroidism"|"2"|"1"  
"21192"|"Levoxyl 88 MCG Oral Tablet"|"69283"|"Hashimoto's Thyroiditis"|"3"|"1"  
"21235"|"Acetaminophen-Codeine #3 300-30 MG Oral Tablet"|"60828"|"Headache"|"10"|"0.263158"  
"21235"|"Acetaminophen-Codeine #3 300-30 MG Oral Tablet"|"60844"|"Tooth Pain"|"2"|"0.666667"  
"21235"|"Acetaminophen-Codeine #3 300-30 MG Oral Tablet"|"60869"|"Cough"|"12"|"0.324324"  
"21235"|"Acetaminophen-Codeine #3 300-30 MG Oral Tablet"|"60899"|"Abdominal Pain"|"5"|"0.151515"  
"21235"|"Acetaminophen-Codeine #3 300-30 MG Oral Tablet"|"62586"|"Chronic Maxillary Sinusitis"|"3"|"0.25"  
"21235"|"Acetaminophen-Codeine #3 300-30 MG Oral Tablet"|"62587"|"Chronic Frontal Sinusitis"|"4"|"0.5"

"21235"|"Acetaminophen-Codeine #3 300-30 MG Oral Tablet"|"62588"|"Chronic Ethmoidal Sinusitis"|"6"|"0.75"  
"21235"|"Acetaminophen-Codeine #3 300-30 MG Oral Tablet"|"64118"|"Acute Bronchitis"|"5"|"0.15625"  
"21235"|"Acetaminophen-Codeine #3 300-30 MG Oral Tablet"|"64119"|"Influenza"|"2"|"0.333333"  
"21235"|"Acetaminophen-Codeine #3 300-30 MG Oral Tablet"|"70146"|"Osteoarthritis"|"3"|"0.166667"  
"21235"|"Acetaminophen-Codeine #3 300-30 MG Oral Tablet"|"70386"|"Acute Gout"|"3"|"1"  
"21235"|"Acetaminophen-Codeine #3 300-30 MG Oral Tablet"|"70455"|"Rheumatoid Arthritis"|"4"|"0.4"  
"21235"|"Acetaminophen-Codeine #3 300-30 MG Oral Tablet"|"73666"|"Backache"|"4"|"0.222222"  
"21235"|"Acetaminophen-Codeine #3 300-30 MG Oral Tablet"|"74530"|"Tension-type Headache"|"3"|"0.375"  
"21235"|"Acetaminophen-Codeine #3 300-30 MG Oral Tablet"|"74535"|"Classic Migraine (With Aura) With  
Intractable Migraine"|"2"|"0.666667"  
"21235"|"Acetaminophen-Codeine #3 300-30 MG Oral Tablet"|"74538"|"Common Migraine (Without Aura) With  
Intractable Migraine"|"2"|"0.4"  
"21235"|"Acetaminophen-Codeine #3 300-30 MG Oral Tablet"|"75588"|"Cervical Spine Stenosis"|"2"|"0.666667"  
"21235"|"Acetaminophen-Codeine #3 300-30 MG Oral Tablet"|"76794"|"Herpes Zoster (Shingles)"|"3"|"0.428571"  
"21235"|"Acetaminophen-Codeine #3 300-30 MG Oral Tablet"|"77891"|"Acute Upper Respiratory  
Infection"|"6"|"0.157895"  
"21235"|"Acetaminophen-Codeine #3 300-30 MG Oral Tablet"|"78008"|"Sickle Cell Hb-SC Disease"|"2"|"1"  
"21235"|"Acetaminophen-Codeine #3 300-30 MG Oral Tablet"|"78035"|"Sickle Cell Hb-SS Disease"|"4"|"0.8"  
"21235"|"Acetaminophen-Codeine #3 300-30 MG Oral Tablet"|"78371"|"Benign Nasal Cavity Neoplasm"|"2"|"1"  
"21235"|"Acetaminophen-Codeine #3 300-30 MG Oral Tablet"|"85614"|"Joint Pain, Localized In The Hip"|"2"|"0.2"  
"21235"|"Acetaminophen-Codeine #3 300-30 MG Oral Tablet"|"85623"|"Joint Pain, Localized In The  
Knee"|"4"|"0.173913"  
"21235"|"Acetaminophen-Codeine #3 300-30 MG Oral Tablet"|"85701"|"Joint Pain, Localized In The  
Shoulder"|"5"|"0.333333"  
"21235"|"Acetaminophen-Codeine #3 300-30 MG Oral Tablet"|"91089"|"Lower Back Pain"|"11"|"0.314286"  
"21235"|"Acetaminophen-Codeine #3 300-30 MG Oral Tablet"|"259187"|"Internal Derangement Of Knee"|"3"|"0.75"  
"21259"|"Aspirin EC 81 MG Oral Tablet Delayed Release"|"63217"|"Congestive Heart Failure"|"2"|"0.25"  
"21297"|"Spironolactone Powder"|"32925"|"Chronic Respiratory Failure"|"4"|"0.444444"  
"21297"|"Spironolactone Powder"|"63484"|"Pulmonary Hypertension"|"5"|"0.25"  
"21297"|"Spironolactone Powder"|"63526"|"Hypoplastic Left Heart Syndrome"|"3"|"0.5"  
"21297"|"Spironolactone Powder"|"63598"|"Ventricular Septal Defect"|"2"|"0.222222"  
"21297"|"Spironolactone Powder"|"67885"|"Bronchopulmonary Dysplasia Of Fetus Or Newborn"|"3"|"0.428571"  
"21297"|"Spironolactone Powder"|"278128"|"Chronic Lung Disease Of Newborn"|"4"|"0.4"  
"21298"|"Spironolactone-HCTZ 25-25 MG Oral Tablet"|"63468"|"Essential Hypertension"|"4"|"0.666667"  
"21526"|"Sinemet CR 50-200 MG Oral Tablet Extended Release"|"75080"|"Parkinson's Disease"|"2"|"0.285714"  
"21593"|"Terazosin HCl 2 MG Oral Capsule"|"62975"|"Coronary Artery Disease"|"2"|"0.222222"  
"21593"|"Terazosin HCl 2 MG Oral Capsule"|"63467"|"Hypertension"|"6"|"0.461538"  
"21593"|"Terazosin HCl 2 MG Oral Capsule"|"63468"|"Essential Hypertension"|"3"|"0.375"  
"21593"|"Terazosin HCl 2 MG Oral Capsule"|"63470"|"Benign Essential Hypertension"|"3"|"0.6"  
"21593"|"Terazosin HCl 2 MG Oral Capsule"|"289131"|"Benign Prostatic Hypertrophy"|"2"|"0.333333"  
"21594"|"Terazosin HCl 10 MG Oral Capsule"|"63467"|"Hypertension"|"3"|"0.214286"  
"21594"|"Terazosin HCl 10 MG Oral Capsule"|"63470"|"Benign Essential Hypertension"|"3"|"0.5"  
"21594"|"Terazosin HCl 10 MG Oral Capsule"|"289131"|"Benign Prostatic Hypertrophy"|"2"|"0.333333"  
"21636"|"Indomethacin CR 75 MG Oral Capsule Extended Release"|"70384"|"Gout"|"3"|"0.333333"  
"21636"|"Indomethacin CR 75 MG Oral Capsule Extended Release"|"70387"|"Chronic Gout"|"2"|"0.666667"  
"21636"|"Indomethacin CR 75 MG Oral Capsule Extended Release"|"70455"|"Rheumatoid Arthritis"|"3"|"1"  
"21636"|"Indomethacin CR 75 MG Oral Capsule Extended Release"|"70706"|"Ankylosing Spondylitis"|"4"|"1"  
"21636"|"Indomethacin CR 75 MG Oral Capsule Extended Release"|"70719"|"Psoriatic Arthropathy"|"2"|"1"  
"21667"|"Sulfamethoxazole-Trimethoprim 400-80 MG Oral Tablet"|"62578"|"Acute Sinusitis"|"3"|"0.333333"  
"21667"|"Sulfamethoxazole-Trimethoprim 400-80 MG Oral Tablet"|"62586"|"Chronic Maxillary Sinusitis"|"2"|"1"  
"21667"|"Sulfamethoxazole-Trimethoprim 400-80 MG Oral Tablet"|"64118"|"Acute Bronchitis"|"3"|"0.3"  
"21667"|"Sulfamethoxazole-Trimethoprim 400-80 MG Oral Tablet"|"65762"|"Urinary Tract Infection"|"19"|"0.575758"  
"21667"|"Sulfamethoxazole-Trimethoprim 400-80 MG Oral Tablet"|"69606"|"Acne"|"2"|"0.4"  
"21667"|"Sulfamethoxazole-Trimethoprim 400-80 MG Oral Tablet"|"69999"|"Cellulitis"|"4"|"0.5"

"21667"|"Sulfamethoxazole-Trimethoprim 400-80 MG Oral Tablet"|"70027"|"Folliculitis"|"3"|"0.428571"  
"21667"|"Sulfamethoxazole-Trimethoprim 400-80 MG Oral Tablet"|"76842"|"Acquired Immunodeficiency Syndrome (AIDS)"|"2"|"0.666667"  
"21667"|"Sulfamethoxazole-Trimethoprim 400-80 MG Oral Tablet"|"274606"|"Chronic Kidney Disease, Stage 3"|"2"|"0.333333"  
"21669"|"SulfaSALAZine 500 MG Oral Tablet"|"64980"|"Crohn's Disease"|"6"|"0.6"  
"21669"|"SulfaSALAZine 500 MG Oral Tablet"|"65041"|"Ulcerative Colitis"|"6"|"0.857143"  
"21669"|"SulfaSALAZine 500 MG Oral Tablet"|"65103"|"Proctitis"|"2"|"0.666667"  
"21669"|"SulfaSALAZine 500 MG Oral Tablet"|"70455"|"Rheumatoid Arthritis"|"30"|"0.857143"  
"21669"|"SulfaSALAZine 500 MG Oral Tablet"|"70480"|"Arthritis Of Inflammatory Bowel Disease"|"2"|"0.666667"  
"21669"|"SulfaSALAZine 500 MG Oral Tablet"|"70706"|"Ankylosing Spondylitis"|"2"|"0.5"  
"21669"|"SulfaSALAZine 500 MG Oral Tablet"|"70719"|"Psoriatic Arthropathy"|"3"|"1"  
"21669"|"SulfaSALAZine 500 MG Oral Tablet"|"70722"|"Spondylitis"|"2"|"1"  
"21669"|"SulfaSALAZine 500 MG Oral Tablet"|"296854"|"Spondyloarthropathy"|"2"|"1"  
"21707"|"Clotrimazole Anti-Fungal 1 % External Cream"|"70124"|"Tinea Corporis"|"3"|"0.75"  
"21740"|"Bromfenex PD 6-60 MG CPCR"|"77891"|"Acute Upper Respiratory Infection"|"2"|"1"  
"21744"|"GlyBURIDE Micronized 1.5 MG Oral Tablet"|"69380"|"Diabetes Mellitus"|"4"|"1"  
"21745"|"GlyBURIDE Micronized 3 MG Oral Tablet"|"69380"|"Diabetes Mellitus"|"5"|"0.555556"  
"21745"|"GlyBURIDE Micronized 3 MG Oral Tablet"|"69402"|"Diabetes Mellitus Poorly Controlled"|"3"|"1"  
"21762"|"Cozaar 25 MG Oral Tablet"|"63467"|"Hypertension"|"8"|"0.216216"  
"21762"|"Cozaar 25 MG Oral Tablet"|"63468"|"Essential Hypertension"|"4"|"0.307692"  
"21795"|"MethylPREDNISolone (Pak) 4 MG Oral Tablet"|"60869"|"Cough"|"13"|"0.309524"  
"21795"|"MethylPREDNISolone (Pak) 4 MG Oral Tablet"|"60874"|"Wheezing"|"2"|"1"  
"21795"|"MethylPREDNISolone (Pak) 4 MG Oral Tablet"|"60886"|"Difficulty Swallowing (Dysphagia)"|"2"|"0.666667"  
"21795"|"MethylPREDNISolone (Pak) 4 MG Oral Tablet"|"62350"|"Acute Serous Otitis Media"|"4"|"1"  
"21795"|"MethylPREDNISolone (Pak) 4 MG Oral Tablet"|"62529"|"Sensorineural Hearing Loss"|"3"|"0.75"  
"21795"|"MethylPREDNISolone (Pak) 4 MG Oral Tablet"|"62561"|"Eustachian Tube Dysfunction"|"19"|"0.904762"  
"21795"|"MethylPREDNISolone (Pak) 4 MG Oral Tablet"|"62586"|"Chronic Maxillary Sinusitis"|"6"|"0.206897"  
"21795"|"MethylPREDNISolone (Pak) 4 MG Oral Tablet"|"62587"|"Chronic Frontal Sinusitis"|"9"|"0.5"  
"21795"|"MethylPREDNISolone (Pak) 4 MG Oral Tablet"|"62588"|"Chronic Ethmoidal Sinusitis"|"12"|"0.352941"  
"21795"|"MethylPREDNISolone (Pak) 4 MG Oral Tablet"|"62589"|"Chronic Sphenoidal Sinusitis"|"2"|"0.4"  
"21795"|"MethylPREDNISolone (Pak) 4 MG Oral Tablet"|"62598"|"Allergic Rhinitis"|"9"|"0.138462"  
"21795"|"MethylPREDNISolone (Pak) 4 MG Oral Tablet"|"62599"|"Allergic Rhinitis Due To Pollen"|"3"|"0.428571"  
"21795"|"MethylPREDNISolone (Pak) 4 MG Oral Tablet"|"62611"|"Chronic Rhinitis"|"6"|"0.545455"  
"21795"|"MethylPREDNISolone (Pak) 4 MG Oral Tablet"|"62733"|"Acute Tonsillitis"|"2"|"1"  
"21795"|"MethylPREDNISolone (Pak) 4 MG Oral Tablet"|"64118"|"Acute Bronchitis"|"4"|"0.190476"  
"21795"|"MethylPREDNISolone (Pak) 4 MG Oral Tablet"|"69710"|"Contact Dermatitis"|"3"|"0.25"  
"21795"|"MethylPREDNISolone (Pak) 4 MG Oral Tablet"|"69941"|"Urticaria"|"2"|"0.285714"  
"21795"|"MethylPREDNISolone (Pak) 4 MG Oral Tablet"|"69948"|"Idiopathic Urticaria"|"2"|"1"  
"21795"|"MethylPREDNISolone (Pak) 4 MG Oral Tablet"|"70384"|"Gout"|"3"|"0.272727"  
"21795"|"MethylPREDNISolone (Pak) 4 MG Oral Tablet"|"73464"|"Lower Back Sprain"|"3"|"0.75"  
"21795"|"MethylPREDNISolone (Pak) 4 MG Oral Tablet"|"74537"|"Common Migraine (Without Aura)"|"3"|"0.333333"  
"21795"|"MethylPREDNISolone (Pak) 4 MG Oral Tablet"|"74538"|"Common Migraine (Without Aura) With Intractable Migraine"|"2"|"0.666667"  
"21795"|"MethylPREDNISolone (Pak) 4 MG Oral Tablet"|"77890"|"Upper Respiratory Infection"|"3"|"0.125"  
"21795"|"MethylPREDNISolone (Pak) 4 MG Oral Tablet"|"77891"|"Acute Upper Respiratory Infection"|"5"|"0.142857"  
"21795"|"MethylPREDNISolone (Pak) 4 MG Oral Tablet"|"88375"|"Skin: A Rash"|"4"|"0.5"  
"21795"|"MethylPREDNISolone (Pak) 4 MG Oral Tablet"|"91089"|"Lower Back Pain"|"6"|"0.352941"  
"21795"|"MethylPREDNISolone (Pak) 4 MG Oral Tablet"|"109994"|"Larynx Edema"|"2"|"0.666667"  
"21795"|"MethylPREDNISolone (Pak) 4 MG Oral Tablet"|"166748"|"Asthma With Acute Exacerbation"|"7"|"0.583333"

"21795"|"MethylPREDNISolone (Pak) 4 MG Oral Tablet"|"173418"|"Radiculopathy"|"2"|"0.666667"  
"21795"|"MethylPREDNISolone (Pak) 4 MG Oral Tablet"|"258010"|"Allergic Reaction"|"5"|"0.714286"  
"21795"|"MethylPREDNISolone (Pak) 4 MG Oral Tablet"|"258835"|"Bronchitis"|"2"|"0.285714"  
"21795"|"MethylPREDNISolone (Pak) 4 MG Oral Tablet"|"278317"|"Dermatitis Due To Contact With Poison Ivy"|"2"|"1"  
"21806"|"PredniSONE (Pak) 5 MG Oral Tablet"|"64181"|"Asthma"|"2"|"0.5"  
"21827"|"MeproN 750 MG/5ML Oral Suspension"|"76835"|"HIV Infection"|"2"|"0.285714"  
"21830"|"Hyzaar 50-12.5 MG Oral Tablet"|"63467"|"Hypertension"|"4"|"0.181818"  
"21830"|"Hyzaar 50-12.5 MG Oral Tablet"|"63468"|"Essential Hypertension"|"4"|"0.333333"  
"21831"|"Hydrocodone-Acetaminophen 7.5-650 MG Oral Tablet"|"91089"|"Lower Back Pain"|"2"|"0.5"  
"22009"|"Diclofenac Sodium 75 MG Oral Tablet Delayed Release"|"70166"|"Localized Primary Osteoarthritis Of The Knee"|"2"|"1"  
"22009"|"Diclofenac Sodium 75 MG Oral Tablet Delayed Release"|"70455"|"Rheumatoid Arthritis"|"7"|"0.875"  
"22009"|"Diclofenac Sodium 75 MG Oral Tablet Delayed Release"|"70719"|"Psoriatic Arthropathy"|"3"|"1"  
"22044"|"Neoral 25 MG Oral Capsule"|"65675"|"Nephrotic Syndrome Due To Minimal Change Glomerulonephritis"|"2"|"1"  
"22044"|"Neoral 25 MG Oral Capsule"|"166834"|"Renal Transplant Recipient Of The Right Kidney"|"2"|"1"  
"22045"|"Neoral 100 MG Oral Capsule"|"65674"|"Nephrotic Syndrome"|"2"|"0.666667"  
"22154"|"Suprax 400 MG Oral Tablet"|"62578"|"Acute Sinusitis"|"6"|"0.666667"  
"22154"|"Suprax 400 MG Oral Tablet"|"65762"|"Urinary Tract Infection"|"5"|"0.625"  
"22154"|"Suprax 400 MG Oral Tablet"|"65878"|"Acute Gonorrhea"|"4"|"1"  
"22154"|"Suprax 400 MG Oral Tablet"|"251528"|"Acute Otitis Media"|"2"|"0.5"  
"22154"|"Suprax 400 MG Oral Tablet"|"274516"|"Acute Pharyngitis Streptococcus"|"2"|"0.5"  
"22154"|"Suprax 400 MG Oral Tablet"|"274533"|"Sore Throat"|"2"|"0.5"  
"22168"|"Synthroid 88 MCG Oral Tablet"|"69258"|"Hypothyroidism"|"53"|"0.519608"  
"22168"|"Synthroid 88 MCG Oral Tablet"|"69260"|"Hypothyroidism Postablative"|"2"|"1"  
"22168"|"Synthroid 88 MCG Oral Tablet"|"69266"|"Congenital Hypothyroidism"|"13"|"0.8125"  
"22169"|"Synthroid 112 MCG Oral Tablet"|"69258"|"Hypothyroidism"|"53"|"0.569892"  
"22169"|"Synthroid 112 MCG Oral Tablet"|"69259"|"Primary Hypothyroidism"|"2"|"0.666667"  
"22169"|"Synthroid 112 MCG Oral Tablet"|"69260"|"Hypothyroidism Postablative"|"3"|"0.6"  
"22169"|"Synthroid 112 MCG Oral Tablet"|"69266"|"Congenital Hypothyroidism"|"6"|"0.857143"  
"22169"|"Synthroid 112 MCG Oral Tablet"|"69283"|"Hashimoto's Thyroiditis"|"2"|"0.333333"  
"22170"|"Synthroid 175 MCG Oral Tablet"|"69258"|"Hypothyroidism"|"17"|"0.548387"  
"22170"|"Synthroid 175 MCG Oral Tablet"|"69260"|"Hypothyroidism Postablative"|"2"|"1"  
"22170"|"Synthroid 175 MCG Oral Tablet"|"69261"|"Postsurgical Primary Hypothyroidism"|"3"|"0.6"  
"22171"|"Synthroid 200 MCG Oral Tablet"|"69258"|"Hypothyroidism"|"10"|"0.357143"  
"22171"|"Synthroid 200 MCG Oral Tablet"|"69261"|"Postsurgical Primary Hypothyroidism"|"2"|"0.666667"  
"22287"|"Epivir 150 MG Oral Tablet"|"76835"|"HIV Infection"|"8"|"0.571429"  
"22326"|"Ovcon-50 50-1 MCG-MG Oral Tablet"|"69546"|"Dysfunctional Uterine Bleeding"|"2"|"1"  
"22333"|"Nystatin Powder (XX)"|"66250"|"Candida Albicans Vulvovaginitis"|"2"|"0.5"  
"22333"|"Nystatin Powder (XX)"|"77205"|"Candidiasis"|"3"|"1"  
"22333"|"Nystatin Powder (XX)"|"77210"|"Cutaneous Candidiasis"|"3"|"1"  
"22333"|"Nystatin Powder (XX)"|"77211"|"Vaginal Candidiasis"|"2"|"0.666667"  
"22333"|"Nystatin Powder (XX)"|"189833"|"Tracheostomy Care Requirement"|"2"|"1"  
"22360"|"Zestoretic 10-12.5 MG Oral Tablet"|"63467"|"Hypertension"|"2"|"0.666667"  
"22374"|"Aurodex 1.4-5.4 % Otic Solution"|"62344"|"Acute Suppurative Otitis Media"|"2"|"1"  
"22374"|"Aurodex 1.4-5.4 % Otic Solution"|"62543"|"Earache"|"4"|"0.8"  
"22379"|"Imdur 30 MG Oral Tablet Extended Release 24 Hour"|"63470"|"Benign Essential Hypertension"|"2"|"0.666667"  
"22391"|"OxyCONTIN 40 MG Oral Tablet Extended Release 12 Hour"|"91089"|"Lower Back Pain"|"2"|"0.666667"  
"22418"|"Clotrimazole AF 1 % External Cream"|"70122"|"Tinea Pedis"|"2"|"1"  
"22418"|"Clotrimazole AF 1 % External Cream"|"70124"|"Tinea Corporis"|"2"|"0.5"  
"22550"|"Bactroban Nasal 2 % Nasal Ointment"|"62588"|"Chronic Ethmoidal Sinusitis"|"5"|"0.625"  
"22550"|"Bactroban Nasal 2 % Nasal Ointment"|"69968"|"Carbuncle"|"3"|"0.75"

"22550"|"Bactroban Nasal 2 % Nasal Ointment"|"69999"|"Cellulitis"|"2"|"0.25"  
"22550"|"Bactroban Nasal 2 % Nasal Ointment"|"70027"|"Folliculitis"|"2"|"0.2"  
"22550"|"Bactroban Nasal 2 % Nasal Ointment"|"70080"|"Skin Abscess"|"4"|"0.4"  
"22550"|"Bactroban Nasal 2 % Nasal Ointment"|"278472"|"Pustular Folliculitis"|"2"|"1"  
"22550"|"Bactroban Nasal 2 % Nasal Ointment"|"278634"|"Skin Abscess Of The Right Buttock"|"2"|"0.666667"  
"22550"|"Bactroban Nasal 2 % Nasal Ointment"|"292748"|"Carrier Of Infectious Disease Staphylococcus Aureus Methicillin Resistant"|"3"|"0.75"  
"22550"|"Bactroban Nasal 2 % Nasal Ointment"|"293641"|"Methicillin Resistant Staphylococcus Aureus Infection"|"6"|"0.75"  
"22552"|"Ranitidine HCl 75 MG Oral Tablet"|"60899"|"Abdominal Pain"|"2"|"0.666667"  
"22553"|"Acetaminophen 160 MG/5ML Oral Elixir"|"77891"|"Acute Upper Respiratory Infection"|"2"|"0.222222"  
"22585"|"Amikacin Sulfate Powder"|"62588"|"Chronic Ethmoidal Sinusitis"|"4"|"1"  
"22620"|"Hydrochlorothiazide Powder"|"32925"|"Chronic Respiratory Failure"|"4"|"0.5"  
"22620"|"Hydrochlorothiazide Powder"|"63484"|"Pulmonary Hypertension"|"7"|"0.35"  
"22620"|"Hydrochlorothiazide Powder"|"67885"|"Bronchopulmonary Dysplasia Of Fetus Or Newborn"|"4"|"0.4"  
"22620"|"Hydrochlorothiazide Powder"|"278128"|"Chronic Lung Disease Of Newborn"|"4"|"0.444444"  
"22635"|"SulfaSALazine Powder"|"296627"|"Colitis"|"3"|"0.75"  
"22686"|"TEGretol XR 200 MG Oral Tablet Extended Release 12 Hour"|"74988"|"Seizure Disorder"|"3"|"0.25"  
"22711"|"Melatonin 5 MG Oral Tablet"|"80831"|"Adenocarcinoma Of The Prostate Gland"|"2"|"1"  
"22711"|"Melatonin 5 MG Oral Tablet"|"80847"|"Renal Cell Carcinoma"|"4"|"1"  
"22711"|"Melatonin 5 MG Oral Tablet"|"278812"|"Prostate Cancer"|"2"|"0.333333"  
"22755"|"Tetracycline HCl 500 MG Oral Capsule"|"69607"|"Acne Vulgaris"|"2"|"1"  
"22755"|"Tetracycline HCl 500 MG Oral Capsule"|"76976"|"Helicobacter Pylori (H. Pylori) Infection"|"5"|"1"  
"22788"|"HumaLOG 100 UNIT/ML Subcutaneous Solution"|"69380"|"Diabetes Mellitus"|"14"|"0.150538"  
"22788"|"HumaLOG 100 UNIT/ML Subcutaneous Solution"|"69381"|"Type II Diabetes Mellitus"|"5"|"0.131579"  
"22788"|"HumaLOG 100 UNIT/ML Subcutaneous Solution"|"69382"|"Type II Diabetes Mellitus - Uncomplicated, Uncontrolled"|"6"|"0.5"  
"22788"|"HumaLOG 100 UNIT/ML Subcutaneous Solution"|"69387"|"Type I Diabetes Mellitus"|"25"|"0.423729"  
"22788"|"HumaLOG 100 UNIT/ML Subcutaneous Solution"|"69388"|"Type I Diabetes Mellitus - Uncontrolled"|"58"|"0.753247"  
"22788"|"HumaLOG 100 UNIT/ML Subcutaneous Solution"|"69401"|"Diabetes Mellitus Under Control"|"2"|"0.333333"  
"22788"|"HumaLOG 100 UNIT/ML Subcutaneous Solution"|"69402"|"Diabetes Mellitus Poorly Controlled"|"31"|"0.563636"  
"22890"|"Dovonex 0.005 % External Cream"|"69901"|"Psoriasis"|"2"|"0.4"  
"22931"|"ZyPREXA 5 MG Oral Tablet"|"30261"|"Bipolar I Disorder, Most Recent Episode, Depressed - Severe With Psychotic Features"|"3"|"1"  
"22931"|"ZyPREXA 5 MG Oral Tablet"|"76272"|"Schizoaffective Disorder"|"3"|"0.75"  
"22931"|"ZyPREXA 5 MG Oral Tablet"|"76276"|"Schizoaffective Disorder - Chronic (With Residual Symptoms)"|"2"|"0.666667"  
"22931"|"ZyPREXA 5 MG Oral Tablet"|"76307"|"Bipolar Disorder"|"2"|"0.333333"  
"22931"|"ZyPREXA 5 MG Oral Tablet"|"76339"|"Bipolar I Disorder, Most Recent Episode, Depressed"|"2"|"0.666667"  
"22931"|"ZyPREXA 5 MG Oral Tablet"|"76363"|"Major Depression, Recurrent With Psychotic Features"|"2"|"1"  
"22931"|"ZyPREXA 5 MG Oral Tablet"|"76388"|"Bipolar Disorder NOS"|"3"|"0.75"  
"22931"|"ZyPREXA 5 MG Oral Tablet"|"251600"|"Dementia"|"2"|"0.4"  
"22933"|"ZyPREXA 10 MG Oral Tablet"|"76213"|"Schizophrenia"|"3"|"0.75"  
"22933"|"ZyPREXA 10 MG Oral Tablet"|"76272"|"Schizoaffective Disorder"|"4"|"1"  
"22933"|"ZyPREXA 10 MG Oral Tablet"|"76276"|"Schizoaffective Disorder - Chronic (With Residual Symptoms)"|"3"|"0.6"  
"22933"|"ZyPREXA 10 MG Oral Tablet"|"76339"|"Bipolar I Disorder, Most Recent Episode, Depressed"|"2"|"1"  
"22933"|"ZyPREXA 10 MG Oral Tablet"|"76351"|"Depression"|"2"|"0.2"  
"22933"|"ZyPREXA 10 MG Oral Tablet"|"76388"|"Bipolar Disorder NOS"|"4"|"0.8"  
"22940"|"Helidac Oral Miscellaneous"|"76976"|"Helicobacter Pylori (H. Pylori) Infection"|"6"|"0.857143"  
"22941"|"Elmiron 100 MG Oral Capsule"|"65756"|"Chronic Interstitial Cystitis"|"3"|"0.375"

"22941"|"Elmiron 100 MG Oral Capsule"|"65777"|"Urge Incontinence Of Urine"|"2"|"1"  
"22978"|"Senna 8.6 MG Oral Tablet"|"65055"|"Chronic Constipation"|"3"|"0.75"  
"22978"|"Senna 8.6 MG Oral Tablet"|"166777"|"Constipation"|"12"|"0.75"  
"23036"|"Thiamine HCl 100 MG Oral Tablet"|"75957"|"Alcohol Abuse"|"2"|"0.666667"  
"23036"|"Thiamine HCl 100 MG Oral Tablet"|"257912"|"Disorder Of Mitochondrial Metabolism"|"2"|"1"  
"23139"|"Denavir 1 % External Cream"|"76782"|"Herpes Simplex Type I"|"6"|"1"  
"23167"|"Levaquin 250 MG Oral Tablet"|"65753"|"Acute Cystitis"|"2"|"0.666667"  
"23167"|"Levaquin 250 MG Oral Tablet"|"65762"|"Urinary Tract Infection"|"8"|"0.615385"  
"23167"|"Levaquin 250 MG Oral Tablet"|"77890"|"Upper Respiratory Infection"|"2"|"1"  
"23170"|"Topamax 100 MG Oral Tablet"|"74988"|"Seizure Disorder"|"10"|"0.25"  
"23170"|"Topamax 100 MG Oral Tablet"|"74992"|"Generalized Convulsive Myoclonic Seizure With Intractable Seizure"|"2"|"1"  
"23170"|"Topamax 100 MG Oral Tablet"|"75001"|"Partial Complex Psychomotor Seizure"|"2"|"0.5"  
"23170"|"Topamax 100 MG Oral Tablet"|"75002"|"Partial Complex Psychomotor Seizure With Intractable Seizure"|"6"|"0.545455"  
"23170"|"Topamax 100 MG Oral Tablet"|"252546"|"Generalized Convulsive Seizure"|"3"|"0.375"  
"23170"|"Topamax 100 MG Oral Tablet"|"252552"|"Generalized Convulsive Tonic-clonic Seizure With Intractable Seizure"|"5"|"0.833333"  
"23170"|"Topamax 100 MG Oral Tablet"|"252566"|"Partial Complex Seizure"|"3"|"0.6"  
"23170"|"Topamax 100 MG Oral Tablet"|"252570"|"Partial Complex Seizure With Secondary Generalization With Intractable Seizure"|"2"|"0.285714"  
"23170"|"Topamax 100 MG Oral Tablet"|"288815"|"Partial Simple Seizure Without Impairment Of Consciousness"|"2"|"1"  
"23170"|"Topamax 100 MG Oral Tablet"|"289879"|"Generalized Convulsive Myoclonic Seizure, Juvenile With Intractable Seizure"|"3"|"1"  
"23178"|"HumuLIN R U-500 (CONCENTRATED) 500 UNIT/ML Subcutaneous Solution"|"69380"|"Diabetes Mellitus"|"2"|"0.285714"  
"23178"|"HumuLIN R U-500 (CONCENTRATED) 500 UNIT/ML Subcutaneous Solution"|"69402"|"Diabetes Mellitus Poorly Controlled"|"6"|"0.857143"  
"23203"|"Lipitor 10 MG Oral Tablet"|"67969"|"Familial Combined Hyperlipidemia"|"3"|"0.428571"  
"23203"|"Lipitor 10 MG Oral Tablet"|"67970"|"Hyperlipidemia"|"229"|"0.537559"  
"23203"|"Lipitor 10 MG Oral Tablet"|"67974"|"Frederickson Type IIB Hyperlipidemia"|"2"|"0.5"  
"23203"|"Lipitor 10 MG Oral Tablet"|"68098"|"Lipoid Metabolism Disorder"|"10"|"0.384615"  
"23203"|"Lipitor 10 MG Oral Tablet"|"257908"|"Essential Hypertriglyceridemia"|"3"|"0.3"  
"23203"|"Lipitor 10 MG Oral Tablet"|"283291"|"Hypercholesterolemia"|"21"|"0.446809"  
"23203"|"Lipitor 10 MG Oral Tablet"|"283292"|"Essential Hypercholesterolemia"|"23"|"0.479167"  
"23203"|"Lipitor 10 MG Oral Tablet"|"291485"|"Dyslipidemia"|"36"|"0.545455"  
"23204"|"Lipitor 20 MG Oral Tablet"|"62975"|"Coronary Artery Disease"|"18"|"0.0886699"  
"23204"|"Lipitor 20 MG Oral Tablet"|"67969"|"Familial Combined Hyperlipidemia"|"5"|"0.357143"  
"23204"|"Lipitor 20 MG Oral Tablet"|"67970"|"Hyperlipidemia"|"303"|"0.578244"  
"23204"|"Lipitor 20 MG Oral Tablet"|"67974"|"Frederickson Type IIB Hyperlipidemia"|"4"|"0.8"  
"23204"|"Lipitor 20 MG Oral Tablet"|"67978"|"Familial Hypercholesterolemia"|"4"|"0.444444"  
"23204"|"Lipitor 20 MG Oral Tablet"|"68098"|"Lipoid Metabolism Disorder"|"10"|"0.588235"  
"23204"|"Lipitor 20 MG Oral Tablet"|"247966"|"Serum Total Cholesterol Was Elevated"|"3"|"0.230769"  
"23204"|"Lipitor 20 MG Oral Tablet"|"257908"|"Essential Hypertriglyceridemia"|"7"|"0.411765"  
"23204"|"Lipitor 20 MG Oral Tablet"|"283291"|"Hypercholesterolemia"|"21"|"0.477273"  
"23204"|"Lipitor 20 MG Oral Tablet"|"283292"|"Essential Hypercholesterolemia"|"32"|"0.492308"  
"23204"|"Lipitor 20 MG Oral Tablet"|"291485"|"Dyslipidemia"|"38"|"0.487179"  
"23269"|"Warfarin Sodium 6 MG Oral Tablet"|"62916"|"Atrial Fibrillation"|"4"|"0.333333"  
"23269"|"Warfarin Sodium 6 MG Oral Tablet"|"257802"|"Venous Thrombosis Of The Deep Vessels Of The Lower Extremity"|"2"|"0.666667"  
"23342"|"Valtrex 1 GM Oral Tablet"|"66213"|"Vaginitis"|"2"|"0.666667"  
"23342"|"Valtrex 1 GM Oral Tablet"|"76783"|"Herpes Simplex Type II"|"4"|"0.5"  
"23379"|"Intron-A 10000000 UNIT/ML Injection Solution"|"181372"|"Renal Carcinoma"|"2"|"1"

"23422"|"Butalbital-APAP-Caffeine 50-325-40 MG Oral Tablet"|"60828"|"Headache"|"9"|"0.45"  
"23422"|"Butalbital-APAP-Caffeine 50-325-40 MG Oral Tablet"|"74530"|"Tension-type Headache"|"2"|"0.25"  
"23422"|"Butalbital-APAP-Caffeine 50-325-40 MG Oral Tablet"|"74533"|"Migraine Headache"|"9"|"0.409091"  
"23422"|"Butalbital-APAP-Caffeine 50-325-40 MG Oral Tablet"|"74534"|"Classic Migraine (With Aura)"|"3"|"0.5"  
"23422"|"Butalbital-APAP-Caffeine 50-325-40 MG Oral Tablet"|"74537"|"Common Migraine (Without  
Aura)"|"10"|"0.625"  
"23482"|"Patanol 0.1 % Ophthalmic Solution"|"61417"|"Conjunctivitis"|"3"|"0.6"  
"23482"|"Patanol 0.1 % Ophthalmic Solution"|"61418"|"Acute Conjunctivitis"|"4"|"0.571429"  
"23482"|"Patanol 0.1 % Ophthalmic Solution"|"61421"|"Acute Vernal Conjunctivitis"|"5"|"0.625"  
"23482"|"Patanol 0.1 % Ophthalmic Solution"|"61423"|"Acute Atopic Conjunctivitis"|"3"|"0.5"  
"23482"|"Patanol 0.1 % Ophthalmic Solution"|"61433"|"Chronic Allergic Conjunctivitis"|"23"|"0.621622"  
"23482"|"Patanol 0.1 % Ophthalmic Solution"|"62598"|"Allergic Rhinitis"|"24"|"0.333333"  
"23482"|"Patanol 0.1 % Ophthalmic Solution"|"93702"|"Allergies"|"3"|"0.1875"  
"23671"|"Condyllox 0.5 % External Gel"|"76875"|"Condyloma Acuminatum"|"2"|"0.666667"  
"23800"|"Coreg 25 MG Oral Tablet"|"63468"|"Essential Hypertension"|"3"|"0.25"  
"23804"|"ZyPREXA 2.5 MG Oral Tablet"|"30261"|"Bipolar I Disorder, Most Recent Episode, Depressed - Severe With  
Psychotic Features"|"2"|"1"  
"23804"|"ZyPREXA 2.5 MG Oral Tablet"|"61118"|"Anxiety (Symptom)"|"2"|"0.666667"  
"23816"|"Lovenox 40 MG/0.4ML Subcutaneous Solution"|"257802"|"Venous Thrombosis Of The Deep Vessels Of The  
Lower Extremity"|"3"|"0.75"  
"23823"|"Tazorac 0.05 % External Gel"|"69606"|"Acne"|"2"|"1"  
"23886"|"Mirapex 0.25 MG Oral Tablet"|"75054"|"Restless Legs Syndrome"|"2"|"0.4"  
"23887"|"Mirapex 1 MG Oral Tablet"|"75080"|"Parkinson's Disease"|"2"|"0.25"  
"23919"|"CellCept 500 MG Oral Tablet"|"70475"|"Scleroderma"|"2"|"1"  
"23992"|"Femara 2.5 MG Oral Tablet"|"278808"|"Breast Cancer"|"3"|"0.3"  
"23992"|"Femara 2.5 MG Oral Tablet"|"292025"|"Short Stature"|"3"|"1"  
"24025"|"Niaspan 750 MG Oral Tablet Extended Release"|"67970"|"Hyperlipidemia"|"6"|"0.5"  
"24025"|"Niaspan 750 MG Oral Tablet Extended Release"|"67988"|"Familial Hypertriglyceridemia"|"2"|"1"  
"24025"|"Niaspan 750 MG Oral Tablet Extended Release"|"291485"|"Dyslipidemia"|"2"|"0.5"  
"24078"|"SEROquel 200 MG Oral Tablet"|"76232"|"Paranoid Schizophrenia"|"2"|"1"  
"24078"|"SEROquel 200 MG Oral Tablet"|"76327"|"Bipolar I Disorder, Most Recent Episode, Mixed Severe With  
Psychotic Features"|"2"|"1"  
"24078"|"SEROquel 200 MG Oral Tablet"|"76329"|"Bipolar I Disorder, Most Recent Episode, Mixed In Partial  
Remission"|"2"|"1"  
"24078"|"SEROquel 200 MG Oral Tablet"|"76351"|"Depression"|"4"|"0.5"  
"24078"|"SEROquel 200 MG Oral Tablet"|"76388"|"Bipolar Disorder NOS"|"4"|"0.571429"  
"24086"|"Avapro 75 MG Oral Tablet"|"63467"|"Hypertension"|"3"|"0.230769"  
"24086"|"Avapro 75 MG Oral Tablet"|"63468"|"Essential Hypertension"|"3"|"1"  
"24104"|"Nasonex 50 MCG/ACT Nasal Suspension"|"28293"|"Rhinitis Medicamentosa"|"2"|"0.666667"  
"24104"|"Nasonex 50 MCG/ACT Nasal Suspension"|"60869"|"Cough"|"14"|"0.16092"  
"24104"|"Nasonex 50 MCG/ACT Nasal Suspension"|"62577"|"Sinusitis"|"8"|"0.16"  
"24104"|"Nasonex 50 MCG/ACT Nasal Suspension"|"62578"|"Acute Sinusitis"|"30"|"0.361446"  
"24104"|"Nasonex 50 MCG/ACT Nasal Suspension"|"62580"|"Acute Maxillary Sinusitis"|"6"|"0.230769"  
"24104"|"Nasonex 50 MCG/ACT Nasal Suspension"|"62586"|"Chronic Maxillary Sinusitis"|"7"|"0.148936"  
"24104"|"Nasonex 50 MCG/ACT Nasal Suspension"|"62587"|"Chronic Frontal Sinusitis"|"4"|"0.129032"  
"24104"|"Nasonex 50 MCG/ACT Nasal Suspension"|"62588"|"Chronic Ethmoidal Sinusitis"|"9"|"0.176471"  
"24104"|"Nasonex 50 MCG/ACT Nasal Suspension"|"62597"|"Rhinitis"|"7"|"0.583333"  
"24104"|"Nasonex 50 MCG/ACT Nasal Suspension"|"62598"|"Allergic Rhinitis"|"332"|"0.721739"  
"24104"|"Nasonex 50 MCG/ACT Nasal Suspension"|"62599"|"Allergic Rhinitis Due To Pollen"|"4"|"0.222222"  
"24104"|"Nasonex 50 MCG/ACT Nasal Suspension"|"62606"|"Allergic Rhinitis Due To Dust Mite"|"3"|"0.6"  
"24104"|"Nasonex 50 MCG/ACT Nasal Suspension"|"62611"|"Chronic Rhinitis"|"15"|"0.319149"  
"24104"|"Nasonex 50 MCG/ACT Nasal Suspension"|"62615"|"Hypertrophied Nasal Turbinate"|"3"|"0.15"  
"24104"|"Nasonex 50 MCG/ACT Nasal Suspension"|"64181"|"Asthma"|"13"|"0.0485075"  
"24104"|"Nasonex 50 MCG/ACT Nasal Suspension"|"76408"|"Adult Sleep Apnea"|"2"|"0.222222"

"24104"|"Nasonex 50 MCG/ACT Nasal Suspension"|"77891"|"Acute Upper Respiratory Infection"|"13"|"0.135417"  
"24104"|"Nasonex 50 MCG/ACT Nasal Suspension"|"87011"|"Drip Or Drainage Down Throat From Above"|"8"|"0.421053"  
"24104"|"Nasonex 50 MCG/ACT Nasal Suspension"|"87028"|"Nasal Passage Blockage (Stuffiness)"|"11"|"0.5"  
"24104"|"Nasonex 50 MCG/ACT Nasal Suspension"|"106693"|"Nasal Discharge Rhinorrhea"|"2"|"0.4"  
"24104"|"Nasonex 50 MCG/ACT Nasal Suspension"|"292142"|"Allergic Rhinitis Due To Mold"|"2"|"0.4"  
"24112"|"Effexor XR 75 MG Oral Capsule Extended Release 24 Hour"|"76351"|"Depression"|"5"|"0.192308"  
"24112"|"Effexor XR 75 MG Oral Capsule Extended Release 24 Hour"|"76536"|"Generalized Anxiety Disorder"|"2"|"0.4"  
"24113"|"Effexor XR 150 MG Oral Capsule Extended Release 24 Hour"|"76351"|"Depression"|"5"|"0.192308"  
"24219"|"Rituxan 10 MG/ML Intravenous Concentrate"|"70455"|"Rheumatoid Arthritis"|"14"|"0.875"  
"24235"|"Serevent Diskus 50 MCG/DOSE Inhalation Aerosol Powder Breath Activated"|"64181"|"Asthma"|"3"|"1"  
"24238"|"Evista 60 MG Oral Tablet"|"69340"|"Osteopenia"|"5"|"0.5"  
"24238"|"Evista 60 MG Oral Tablet"|"69341"|"Osteoporosis"|"9"|"0.473684"  
"24251"|"Zomig 2.5 MG Oral Tablet"|"60828"|"Headache"|"2"|"0.5"  
"24251"|"Zomig 2.5 MG Oral Tablet"|"74533"|"Migraine Headache"|"5"|"0.454545"  
"24251"|"Zomig 2.5 MG Oral Tablet"|"74534"|"Classic Migraine (With Aura)"|"2"|"1"  
"24251"|"Zomig 2.5 MG Oral Tablet"|"293498"|"Chronic Common Migraine (Without Aura)"|"3"|"1"  
"24255"|"Zomig 5 MG Oral Tablet"|"74533"|"Migraine Headache"|"5"|"0.416667"  
"24255"|"Zomig 5 MG Oral Tablet"|"74537"|"Common Migraine (Without Aura)"|"2"|"0.5"  
"24255"|"Zomig 5 MG Oral Tablet"|"74538"|"Common Migraine (Without Aura) With Intractable Migraine"|"2"|"0.666667"  
"24261"|"Bactroban 2 % External Cream"|"69663"|"Decubitus Ulcer"|"2"|"1"  
"24261"|"Bactroban 2 % External Cream"|"69710"|"Contact Dermatitis"|"5"|"0.166667"  
"24261"|"Bactroban 2 % External Cream"|"69847"|"Papular Urticaria"|"22"|"0.814815"  
"24261"|"Bactroban 2 % External Cream"|"69968"|"Carbuncle"|"5"|"0.714286"  
"24261"|"Bactroban 2 % External Cream"|"69999"|"Cellulitis"|"2"|"0.222222"  
"24261"|"Bactroban 2 % External Cream"|"70027"|"Folliculitis"|"4"|"0.235294"  
"24261"|"Bactroban 2 % External Cream"|"70050"|"Furuncle On The Buttock"|"2"|"0.666667"  
"24261"|"Bactroban 2 % External Cream"|"70060"|"Impetigo"|"8"|"0.5"  
"24261"|"Bactroban 2 % External Cream"|"70112"|"Atopic Dermatitis"|"7"|"0.184211"  
"24261"|"Bactroban 2 % External Cream"|"81260"|"Nonvenomous Insect Bite Of The Face"|"3"|"0.2"  
"24261"|"Bactroban 2 % External Cream"|"81336"|"Infected Nonvenomous Insect Bite"|"3"|"0.6"  
"24261"|"Bactroban 2 % External Cream"|"88375"|"Skin: A Rash"|"3"|"0.428571"  
"24261"|"Bactroban 2 % External Cream"|"93705"|"Dermatitis"|"5"|"0.294118"  
"24261"|"Bactroban 2 % External Cream"|"124553"|"Pustules"|"2"|"0.666667"  
"24261"|"Bactroban 2 % External Cream"|"278350"|"Eczema"|"4"|"0.166667"  
"24261"|"Bactroban 2 % External Cream"|"278552"|"Furunculosis"|"5"|"1"  
"24261"|"Bactroban 2 % External Cream"|"293641"|"Methicillin Resistant Staphylococcus Aureus Infection"|"3"|"0.75"  
"24272"|"Regranex 0.01 % External Gel"|"69447"|"Diabetic Foot Ulcer"|"4"|"1"  
"24285"|"Carbatrol 300 MG Oral Capsule Extended Release 12 Hour"|"74988"|"Seizure Disorder"|"3"|"0.3"  
"24285"|"Carbatrol 300 MG Oral Capsule Extended Release 12 Hour"|"75001"|"Partial Complex Psychomotor Seizure"|"3"|"0.75"  
"24285"|"Carbatrol 300 MG Oral Capsule Extended Release 12 Hour"|"75002"|"Partial Complex Psychomotor Seizure With Intractable Seizure"|"2"|"0.333333"  
"24285"|"Carbatrol 300 MG Oral Capsule Extended Release 12 Hour"|"252566"|"Partial Complex Seizure"|"3"|"1"  
"24285"|"Carbatrol 300 MG Oral Capsule Extended Release 12 Hour"|"252570"|"Partial Complex Seizure With Secondary Generalization With Intractable Seizure"|"2"|"1"  
"24287"|"Plavix 75 MG Oral Tablet"|"62916"|"Atrial Fibrillation"|"11"|"0.115789"  
"24287"|"Plavix 75 MG Oral Tablet"|"62975"|"Coronary Artery Disease"|"404"|"0.5"  
"24287"|"Plavix 75 MG Oral Tablet"|"62978"|"Coronary Arteriosclerosis"|"24"|"0.324324"  
"24287"|"Plavix 75 MG Oral Tablet"|"62983"|"Arteriosclerotic Cardiovascular Disease (ASCVD)"|"3"|"0.5"  
"24287"|"Plavix 75 MG Oral Tablet"|"63012"|"Chronic Diffuse Ischemic Heart Disease"|"2"|"0.333333"  
"24287"|"Plavix 75 MG Oral Tablet"|"63148"|"2-vessel Coronary Artery Stenosis"|"17"|"0.414634"

"24287"|"Plavix 75 MG Oral Tablet"|"63217"|"Congestive Heart Failure"|"19"|"0.113772"  
"24287"|"Plavix 75 MG Oral Tablet"|"63467"|"Hypertension"|"16"|"0.0169851"  
"24287"|"Plavix 75 MG Oral Tablet"|"63499"|"Atrial Septal Defect"|"3"|"0.176471"  
"24287"|"Plavix 75 MG Oral Tablet"|"63628"|"Patent Foramen Ovale"|"3"|"0.176471"  
"24287"|"Plavix 75 MG Oral Tablet"|"63723"|"Atherosclerosis"|"5"|"0.16129"  
"24287"|"Plavix 75 MG Oral Tablet"|"63738"|"Peripheral Vascular Disease"|"13"|"0.0977444"  
"24287"|"Plavix 75 MG Oral Tablet"|"63765"|"Carotid Artery Stenosis"|"13"|"0.185714"  
"24287"|"Plavix 75 MG Oral Tablet"|"67970"|"Hyperlipidemia"|"12"|"0.0137143"  
"24287"|"Plavix 75 MG Oral Tablet"|"75032"|"Vascular Dementia"|"6"|"0.428571"  
"24287"|"Plavix 75 MG Oral Tablet"|"75153"|"Transient Ischemic Attack"|"17"|"0.161905"  
"24287"|"Plavix 75 MG Oral Tablet"|"75172"|"Stroke Syndrome"|"14"|"0.0546875"  
"24287"|"Plavix 75 MG Oral Tablet"|"75178"|"Stroke Of The Left Middle Cerebral Artery"|"2"|"0.4"  
"24287"|"Plavix 75 MG Oral Tablet"|"75353"|"Cerebral Artery Thrombosis"|"2"|"0.285714"  
"24287"|"Plavix 75 MG Oral Tablet"|"75354"|"Cerebral Artery Thrombosis - With Cerebral  
Infarction"|"14"|"0.222222"  
"24287"|"Plavix 75 MG Oral Tablet"|"75356"|"Cerebral Embolism - With Cerebral Infarction"|"5"|"0.147059"  
"24287"|"Plavix 75 MG Oral Tablet"|"75369"|"Late CVD Effects: Cognitive Deficits"|"2"|"0.4"  
"24287"|"Plavix 75 MG Oral Tablet"|"83961"|"Aortic Valve Replacement"|"2"|"0.666667"  
"24287"|"Plavix 75 MG Oral Tablet"|"201182"|"Ischemic Embolic Stroke"|"2"|"0.25"  
"24287"|"Plavix 75 MG Oral Tablet"|"201186"|"Ischemic Stroke"|"10"|"0.175439"  
"24287"|"Plavix 75 MG Oral Tablet"|"260898"|"Kidney Cancer"|"2"|"0.2"  
"24287"|"Plavix 75 MG Oral Tablet"|"288850"|"Cerebral Artery Occlusion With Cerebral Infarction"|"3"|"0.3"  
"24311"|"Singulair 5 MG Oral Tablet Chewable"|"62598"|"Allergic Rhinitis"|"88"|"0.497175"  
"24311"|"Singulair 5 MG Oral Tablet Chewable"|"64180"|"Reactive Airway Disease"|"3"|"0.1875"  
"24311"|"Singulair 5 MG Oral Tablet Chewable"|"64181"|"Asthma"|"63"|"0.321429"  
"24311"|"Singulair 5 MG Oral Tablet Chewable"|"64182"|"Mild Intermittent Asthma"|"3"|"0.125"  
"24311"|"Singulair 5 MG Oral Tablet Chewable"|"64183"|"Mild Persistent Asthma"|"4"|"0.307692"  
"24311"|"Singulair 5 MG Oral Tablet Chewable"|"64186"|"Extrinsic Asthma"|"3"|"0.6"  
"24311"|"Singulair 5 MG Oral Tablet Chewable"|"64190"|"Exercise-induced Asthma"|"3"|"0.230769"  
"24311"|"Singulair 5 MG Oral Tablet Chewable"|"258832"|"Cough Variant Asthma"|"2"|"0.285714"  
"24311"|"Singulair 5 MG Oral Tablet Chewable"|"289126"|"Eosinophilic Esophagitis"|"3"|"0.75"  
"24332"|"Sulfamethoxazole-Trimethoprim 200-40 MG/5ML Oral Suspension"|"60928"|"Pain During Urination  
(Dysuria)"|"4"|"0.307692"  
"24332"|"Sulfamethoxazole-Trimethoprim 200-40 MG/5ML Oral Suspension"|"62343"|"Otitis Media"|"3"|"0.12"  
"24332"|"Sulfamethoxazole-Trimethoprim 200-40 MG/5ML Oral Suspension"|"62719"|"Acute  
Tracheitis"|"2"|"0.222222"  
"24332"|"Sulfamethoxazole-Trimethoprim 200-40 MG/5ML Oral  
Suspension"|"65631"|"Hydronephrosis"|"4"|"0.235294"  
"24332"|"Sulfamethoxazole-Trimethoprim 200-40 MG/5ML Oral Suspension"|"65745"|"Vesicoureteral  
Reflux"|"17"|"0.447368"  
"24332"|"Sulfamethoxazole-Trimethoprim 200-40 MG/5ML Oral Suspension"|"65762"|"Urinary Tract  
Infection"|"29"|"0.386667"  
"24332"|"Sulfamethoxazole-Trimethoprim 200-40 MG/5ML Oral Suspension"|"65763"|"Urinary Tract Infection,  
Pediatric Presentation"|"3"|"0.272727"  
"24332"|"Sulfamethoxazole-Trimethoprim 200-40 MG/5ML Oral Suspension"|"65769"|"Neurogenic  
Bladder"|"2"|"0.333333"  
"24332"|"Sulfamethoxazole-Trimethoprim 200-40 MG/5ML Oral Suspension"|"69999"|"Cellulitis"|"10"|"0.416667"  
"24332"|"Sulfamethoxazole-Trimethoprim 200-40 MG/5ML Oral Suspension"|"70027"|"Folliculitis"|"3"|"0.333333"  
"24332"|"Sulfamethoxazole-Trimethoprim 200-40 MG/5ML Oral Suspension"|"70050"|"Furuncle On The  
Buttock"|"6"|"0.857143"  
"24332"|"Sulfamethoxazole-Trimethoprim 200-40 MG/5ML Oral Suspension"|"70060"|"Impetigo"|"9"|"0.5"  
"24332"|"Sulfamethoxazole-Trimethoprim 200-40 MG/5ML Oral Suspension"|"70094"|"Skin Abscess Of The  
Buttocks"|"3"|"0.6"  
"24332"|"Sulfamethoxazole-Trimethoprim 200-40 MG/5ML Oral Suspension"|"76835"|"HIV Infection"|"4"|"0.8"

"24332"|"Sulfamethoxazole-Trimethoprim 200-40 MG/5ML Oral Suspension"|"78152"|"Immunodeficiency Disorders"|"2"|"0.285714"

"24332"|"Sulfamethoxazole-Trimethoprim 200-40 MG/5ML Oral Suspension"|"78154"|"DiGeorge Syndrome"|"2"|"0.285714"

"24332"|"Sulfamethoxazole-Trimethoprim 200-40 MG/5ML Oral Suspension"|"166828"|"Hydronephrosis On The Left"|"6"|"0.5"

"24332"|"Sulfamethoxazole-Trimethoprim 200-40 MG/5ML Oral Suspension"|"166997"|"Vesicoureteral Reflux With Nephropathy Of The Left Kidney"|"3"|"0.6"

"24332"|"Sulfamethoxazole-Trimethoprim 200-40 MG/5ML Oral Suspension"|"251528"|"Acute Otitis Media"|"5"|"0.135135"

"24332"|"Sulfamethoxazole-Trimethoprim 200-40 MG/5ML Oral Suspension"|"278526"|"Skin Abscess Of The Left Thigh"|"2"|"0.666667"

"24332"|"Sulfamethoxazole-Trimethoprim 200-40 MG/5ML Oral Suspension"|"278552"|"Furunculosis"|"5"|"0.833333"

"24346"|"Prandin 0.5 MG Oral Tablet"|"69380"|"Diabetes Mellitus"|"4"|"0.5"

"24346"|"Prandin 0.5 MG Oral Tablet"|"69381"|"Type II Diabetes Mellitus"|"3"|"0.375"

"24397"|"Viagra 25 MG Oral Tablet"|"65952"|"Organic Impotence"|"2"|"1"

"24397"|"Viagra 25 MG Oral Tablet"|"76651"|"Male Erectile Disorder"|"25"|"0.833333"

"24397"|"Viagra 25 MG Oral Tablet"|"76661"|"Male Erectile Disorder Due To Physical Condition"|"2"|"1"

"24398"|"Trivora (28) Oral Tablet"|"85949"|"Birth Control Method - Oral Contraceptives"|"2"|"1"

"24398"|"Trivora (28) Oral Tablet"|"187792"|"Gynecologic Services Contraceptive Management"|"5"|"0.625"

"24398"|"Trivora (28) Oral Tablet"|"250989"|"Oral Contraceptives"|"2"|"0.666667"

"24420"|"Adderall 10 MG Oral Tablet"|"75818"|"Attention-deficit Hyperactivity Disorder"|"2"|"0.222222"

"24420"|"Adderall 10 MG Oral Tablet"|"75819"|"ADHD, Predominantly Inattentive Type"|"8"|"0.571429"

"24421"|"Adderall 20 MG Oral Tablet"|"75819"|"ADHD, Predominantly Inattentive Type"|"9"|"0.5625"

"24421"|"Adderall 20 MG Oral Tablet"|"275486"|"ADHD, Combined Type"|"2"|"1"

"24422"|"Adderall 30 MG Oral Tablet"|"75818"|"Attention-deficit Hyperactivity Disorder"|"2"|"0.4"

"24478"|"Verapamil HCl CR 240 MG Oral Capsule Extended Release 24 Hour"|"63467"|"Hypertension"|"8"|"0.285714"

"24478"|"Verapamil HCl CR 240 MG Oral Capsule Extended Release 24 Hour"|"63468"|"Essential Hypertension"|"8"|"0.5"

"24478"|"Verapamil HCl CR 240 MG Oral Capsule Extended Release 24 Hour"|"63470"|"Benign Essential Hypertension"|"11"|"0.6875"

"24499"|"Lovenox 80 MG/0.8ML Subcutaneous Solution"|"64277"|"Pulmonary Embolism"|"3"|"0.428571"

"24529"|"Droxia 300 MG Oral Capsule"|"78035"|"Sickle Cell Hb-SS Disease"|"3"|"0.75"

"24531"|"Maxalt 10 MG Oral Tablet"|"60828"|"Headache"|"8"|"0.444444"

"24531"|"Maxalt 10 MG Oral Tablet"|"74533"|"Migraine Headache"|"9"|"0.243243"

"24531"|"Maxalt 10 MG Oral Tablet"|"74534"|"Classic Migraine (With Aura)"|"4"|"0.333333"

"24531"|"Maxalt 10 MG Oral Tablet"|"74537"|"Common Migraine (Without Aura)"|"4"|"0.5"

"24531"|"Maxalt 10 MG Oral Tablet"|"74538"|"Common Migraine (Without Aura) With Intractable Migraine"|"2"|"0.5"

"24532"|"Maxalt-MLT 5 MG Oral Tablet Dispersible"|"74529"|"Headache Syndromes"|"2"|"0.5"

"24532"|"Maxalt-MLT 5 MG Oral Tablet Dispersible"|"74533"|"Migraine Headache"|"6"|"0.461538"

"24532"|"Maxalt-MLT 5 MG Oral Tablet Dispersible"|"74537"|"Common Migraine (Without Aura)"|"2"|"0.5"

"24533"|"Maxalt-MLT 10 MG Oral Tablet Dispersible"|"74533"|"Migraine Headache"|"12"|"0.461538"

"24533"|"Maxalt-MLT 10 MG Oral Tablet Dispersible"|"74534"|"Classic Migraine (With Aura)"|"5"|"0.555556"

"24533"|"Maxalt-MLT 10 MG Oral Tablet Dispersible"|"74537"|"Common Migraine (Without Aura)"|"4"|"0.571429"

"24533"|"Maxalt-MLT 10 MG Oral Tablet Dispersible"|"293541"|"New Daily Persistent Headache"|"4"|"0.8"

"24548"|"Acetamin 500 MG Oral Tablet"|"70146"|"Osteoarthritis"|"2"|"0.666667"

"24566"|"Oscal 500/200 D-3 500-200 MG-UNIT Oral Tablet"|"69341"|"Osteoporosis"|"2"|"0.222222"

"24567"|"CeleXA 20 MG Oral Tablet"|"76307"|"Bipolar Disorder"|"2"|"0.5"

"24567"|"CeleXA 20 MG Oral Tablet"|"76351"|"Depression"|"3"|"0.1"

"24654"|"Remicade 100 MG Intravenous Solution Reconstituted"|"64980"|"Crohn's Disease"|"4"|"0.4"

"24654"|"Remicade 100 MG Intravenous Solution Reconstituted"|"70455"|"Rheumatoid Arthritis"|"12"|"0.923077"

"24654"|"Remicade 100 MG Intravenous Solution Reconstituted"|"70706"|"Ankylosing Spondylitis"|"8"|"0.888889"

"24654"|"Remicade 100 MG Intravenous Solution Reconstituted"|"70719"|"Psoriatic Arthropathy"|"5"|"1"  
"24658"|"CombiPatch 0.05-0.14 MG/DAY Transdermal Patch Biweekly"|"195794"|"Symptomatic Menopause"|"2"|"1"  
"24659"|"Arava 20 MG Oral Tablet"|"70455"|"Rheumatoid Arthritis"|"5"|"0.384615"  
"24665"|"Sustiva 200 MG Oral Capsule"|"76835"|"HIV Infection"|"2"|"0.666667"  
"24690"|"Bicillin L-A 1200000 UNIT/2ML Intramuscular Suspension"|"62760"|"Acute Pharyngitis"|"3"|"0.5"  
"24690"|"Bicillin L-A 1200000 UNIT/2ML Intramuscular Suspension"|"77891"|"Acute Upper Respiratory  
Infection"|"2"|"0.666667"  
"24690"|"Bicillin L-A 1200000 UNIT/2ML Intramuscular Suspension"|"166549"|"Acute Streptococcal  
Tonsillitis"|"5"|"1"  
"24690"|"Bicillin L-A 1200000 UNIT/2ML Intramuscular Suspension"|"251575"|"Streptococcal Sore  
Throat"|"7"|"0.777778"  
"24690"|"Bicillin L-A 1200000 UNIT/2ML Intramuscular Suspension"|"274516"|"Acute Pharyngitis  
Streptococcus"|"3"|"1"  
"24691"|"Bicillin L-A 2400000 UNIT/4ML Intramuscular Suspension"|"77097"|"Syphilis"|"4"|"0.666667"  
"24691"|"Bicillin L-A 2400000 UNIT/4ML Intramuscular Suspension"|"77114"|"Latent Late Syphilis"|"2"|"1"  
"24693"|"Atacand 32 MG Oral Tablet"|"63467"|"Hypertension"|"8"|"0.347826"  
"24693"|"Atacand 32 MG Oral Tablet"|"63468"|"Essential Hypertension"|"4"|"0.444444"  
"24693"|"Atacand 32 MG Oral Tablet"|"63470"|"Benign Essential Hypertension"|"4"|"0.666667"  
"24717"|"Pepcid AC 10 MG Oral Tablet Chewable"|"64688"|"Esophageal Reflux"|"2"|"1"  
"24777"|"Isosorbide Mononitrate CR 60 MG Oral Tablet Extended Release 24 Hour"|"62975"|"Coronary Artery  
Disease"|"41"|"0.455556"  
"24777"|"Isosorbide Mononitrate CR 60 MG Oral Tablet Extended Release 24 Hour"|"62984"|"Atypical Chest  
Pain"|"2"|"0.285714"  
"24777"|"Isosorbide Mononitrate CR 60 MG Oral Tablet Extended Release 24 Hour"|"62987"|"Angina  
Pectoris"|"3"|"0.3"  
"24777"|"Isosorbide Mononitrate CR 60 MG Oral Tablet Extended Release 24 Hour"|"63217"|"Congestive Heart  
Failure"|"23"|"0.365079"  
"24777"|"Isosorbide Mononitrate CR 60 MG Oral Tablet Extended Release 24  
Hour"|"63467"|"Hypertension"|"11"|"0.111111"  
"24777"|"Isosorbide Mononitrate CR 60 MG Oral Tablet Extended Release 24 Hour"|"63468"|"Essential  
Hypertension"|"9"|"0.157895"  
"24777"|"Isosorbide Mononitrate CR 60 MG Oral Tablet Extended Release 24 Hour"|"63470"|"Benign Essential  
Hypertension"|"6"|"0.136364"  
"24777"|"Isosorbide Mononitrate CR 60 MG Oral Tablet Extended Release 24 Hour"|"250918"|"Chronic Systolic  
Congestive Heart Failure"|"2"|"0.333333"  
"24829"|"SandoSTATIN LAR Depot 30 MG Intramuscular Kit"|"258894"|"Acromegaly"|"2"|"1"  
"24850"|"CeleBREX 100 MG Oral Capsule"|"70146"|"Osteoarthritis"|"10"|"0.4"  
"24850"|"CeleBREX 100 MG Oral Capsule"|"70217"|"Osteoarthritis Of The Hand"|"2"|"0.666667"  
"24850"|"CeleBREX 100 MG Oral Capsule"|"70455"|"Rheumatoid Arthritis"|"2"|"0.5"  
"24850"|"CeleBREX 100 MG Oral Capsule"|"70500"|"Polymyalgia Rheumatica"|"2"|"0.666667"  
"24850"|"CeleBREX 100 MG Oral Capsule"|"73666"|"Backache"|"2"|"0.222222"  
"24850"|"CeleBREX 100 MG Oral Capsule"|"75717"|"Cervicalgia"|"2"|"0.2"  
"24850"|"CeleBREX 100 MG Oral Capsule"|"85623"|"Joint Pain, Localized In The Knee"|"6"|"0.352941"  
"24850"|"CeleBREX 100 MG Oral Capsule"|"91089"|"Lower Back Pain"|"7"|"0.4375"  
"24850"|"CeleBREX 100 MG Oral Capsule"|"92456"|"Joint Pain, Localized In More Than One Joint"|"2"|"0.666667"  
"24850"|"CeleBREX 100 MG Oral Capsule"|"168811"|"Traumatic Arthritis Of The Ankle"|"2"|"1"  
"24850"|"CeleBREX 100 MG Oral Capsule"|"251467"|"Limb Pain"|"2"|"0.285714"  
"24850"|"CeleBREX 100 MG Oral Capsule"|"257996"|"Arthritis"|"3"|"0.157895"  
"24850"|"CeleBREX 100 MG Oral Capsule"|"278685"|"Arthralgias In Multiple Sites"|"3"|"0.75"  
"24850"|"CeleBREX 100 MG Oral Capsule"|"288977"|"Fibromyalgia"|"2"|"0.25"  
"24857"|"Isosorbide Mononitrate CR 30 MG Oral Tablet Extended Release 24 Hour"|"62975"|"Coronary Artery  
Disease"|"61"|"0.455224"  
"24857"|"Isosorbide Mononitrate CR 30 MG Oral Tablet Extended Release 24 Hour"|"62978"|"Coronary  
Arteriosclerosis"|"6"|"0.26087"

"24857"|"Isosorbide Mononitrate CR 30 MG Oral Tablet Extended Release 24 Hour"|"62985"|"Chest Pain"|"5"|"0.25"  
"24857"|"Isosorbide Mononitrate CR 30 MG Oral Tablet Extended Release 24 Hour"|"62987"|"Angina  
Pectoris"|"5"|"0.277778"  
"24857"|"Isosorbide Mononitrate CR 30 MG Oral Tablet Extended Release 24  
Hour"|"63173"|"Cardiomyopathy"|"4"|"0.444444"  
"24857"|"Isosorbide Mononitrate CR 30 MG Oral Tablet Extended Release 24 Hour"|"63217"|"Congestive Heart  
Failure"|"18"|"0.310345"  
"24857"|"Isosorbide Mononitrate CR 30 MG Oral Tablet Extended Release 24 Hour"|"63222"|"Left Heart Failure -  
Class III"|"2"|"0.4"  
"24857"|"Isosorbide Mononitrate CR 30 MG Oral Tablet Extended Release 24 Hour"|"63271"|"Aortic  
Stenosis"|"2"|"0.285714"  
"24857"|"Isosorbide Mononitrate CR 30 MG Oral Tablet Extended Release 24  
Hour"|"63467"|"Hypertension"|"25"|"0.163399"  
"24857"|"Isosorbide Mononitrate CR 30 MG Oral Tablet Extended Release 24 Hour"|"63468"|"Essential  
Hypertension"|"13"|"0.178082"  
"24857"|"Isosorbide Mononitrate CR 30 MG Oral Tablet Extended Release 24 Hour"|"63470"|"Benign Essential  
Hypertension"|"10"|"0.153846"  
"24857"|"Isosorbide Mononitrate CR 30 MG Oral Tablet Extended Release 24 Hour"|"250918"|"Chronic Systolic  
Congestive Heart Failure"|"2"|"0.285714"  
"24860"|"Glyset 25 MG Oral Tablet"|"69401"|"Diabetes Mellitus Under Control"|"2"|"0.666667"  
"24869"|"HumuLIN 70/30 Pen 70-30 % Subcutaneous Suspension"|"69382"|"Type II Diabetes Mellitus -  
Uncomplicated, Uncontrolled"|"2"|"0.666667"  
"24870"|"HumuLIN N Pen 100 UNIT/ML Subcutaneous Suspension"|"69380"|"Diabetes Mellitus"|"4"|"0.266667"  
"24870"|"HumuLIN N Pen 100 UNIT/ML Subcutaneous Suspension"|"69381"|"Type II Diabetes Mellitus"|"3"|"0.6"  
"24870"|"HumuLIN N Pen 100 UNIT/ML Subcutaneous Suspension"|"69401"|"Diabetes Mellitus Under  
Control"|"2"|"0.666667"  
"24870"|"HumuLIN N Pen 100 UNIT/ML Subcutaneous Suspension"|"69402"|"Diabetes Mellitus Poorly  
Controlled"|"3"|"0.6"  
"24913"|"Kristalose 20 GM Oral Packet"|"65055"|"Chronic Constipation"|"2"|"1"  
"24913"|"Kristalose 20 GM Oral Packet"|"166777"|"Constipation"|"4"|"0.571429"  
"24923"|"Provigil 200 MG Oral Tablet"|"75125"|"Multiple Sclerosis"|"11"|"0.323529"  
"24923"|"Provigil 200 MG Oral Tablet"|"76397"|"Primary Hypersomnia"|"2"|"1"  
"24923"|"Provigil 200 MG Oral Tablet"|"76409"|"Narcolepsy"|"3"|"0.5"  
"24923"|"Provigil 200 MG Oral Tablet"|"173466"|"Obstructive Sleep Apnea"|"2"|"0.4"  
"24923"|"Provigil 200 MG Oral Tablet"|"275608"|"Idiopathic Organic Hypersomnia"|"2"|"1"  
"25014"|"MiraLax Oral Powder"|"166777"|"Constipation"|"5"|"0.25"  
"25023"|"Ortho Tri-Cyclen (28) 0.18/0.215/0.25 MG-35 MCG Oral Tablet"|"69549"|"Polycystic Ovarian  
Syndrome"|"6"|"0.857143"  
"25023"|"Ortho Tri-Cyclen (28) 0.18/0.215/0.25 MG-35 MCG Oral Tablet"|"69606"|"Acne"|"2"|"0.4"  
"25023"|"Ortho Tri-Cyclen (28) 0.18/0.215/0.25 MG-35 MCG Oral Tablet"|"187792"|"Gynecologic Services  
Contraceptive Management"|"11"|"0.52381"  
"25023"|"Ortho Tri-Cyclen (28) 0.18/0.215/0.25 MG-35 MCG Oral Tablet"|"250989"|"Oral  
Contraceptives"|"5"|"0.714286"  
"25023"|"Ortho Tri-Cyclen (28) 0.18/0.215/0.25 MG-35 MCG Oral Tablet"|"250996"|"Contraceptives"|"2"|"0.4"  
"25024"|"Ortho-Cyclen (28) 0.25-35 MG-MCG Oral Tablet"|"66133"|"Dysmenorrhea"|"4"|"0.8"  
"25024"|"Ortho-Cyclen (28) 0.25-35 MG-MCG Oral Tablet"|"69549"|"Polycystic Ovarian Syndrome"|"6"|"0.857143"  
"25024"|"Ortho-Cyclen (28) 0.25-35 MG-MCG Oral Tablet"|"250989"|"Oral Contraceptives"|"3"|"0.6"  
"25053"|"Avalide 300-12.5 MG Oral Tablet"|"63467"|"Hypertension"|"3"|"0.15"  
"25053"|"Avalide 300-12.5 MG Oral Tablet"|"63468"|"Essential Hypertension"|"6"|"0.545455"  
"25053"|"Avalide 300-12.5 MG Oral Tablet"|"63470"|"Benign Essential Hypertension"|"7"|"0.7"  
"25085"|"Nizoral A-D 1 % External Shampoo"|"70135"|"Seborrheic Dermatitis"|"2"|"1"  
"25108"|"Verapamil HCl CR 360 MG Oral Capsule Extended Release 24  
Hour"|"63467"|"Hypertension"|"2"|"0.285714"  
"25108"|"Verapamil HCl CR 360 MG Oral Capsule Extended Release 24 Hour"|"63470"|"Benign Essential

Hypertension"|"4"|"1"  
"25111"|"Avandia 2 MG Oral Tablet"|"69381"|"Type II Diabetes Mellitus"|"2"|"0.333333"  
"25112"|"Avandia 8 MG Oral Tablet"|"69380"|"Diabetes Mellitus"|"2"|"0.4"  
"25134"|"Coenzyme Q10 200 MG Oral Tablet"|"257912"|"Disorder Of Mitochondrial Metabolism"|"3"|"1"  
"25188"|"Actos 15 MG Oral Tablet"|"65712"|"Diabetic Nephropathy Type II - Uncontrolled"|"2"|"1"  
"25188"|"Actos 15 MG Oral Tablet"|"69380"|"Diabetes Mellitus"|"38"|"0.327586"  
"25188"|"Actos 15 MG Oral Tablet"|"69381"|"Type II Diabetes Mellitus"|"17"|"0.265625"  
"25188"|"Actos 15 MG Oral Tablet"|"69382"|"Type II Diabetes Mellitus - Uncomplicated, Uncontrolled"|"7"|"0.4375"  
"25188"|"Actos 15 MG Oral Tablet"|"69401"|"Diabetes Mellitus Under Control"|"5"|"0.555556"  
"25188"|"Actos 15 MG Oral Tablet"|"69402"|"Diabetes Mellitus Poorly Controlled"|"27"|"0.45"  
"25292"|"Neurontin 800 MG Oral Tablet"|"69424"|"Diabetic Peripheral Neuropathy"|"2"|"0.5"  
"25294"|"Humatrope 6 MG Injection Solution Reconstituted"|"67803"|"Turner Syndrome"|"2"|"0.666667"  
"25294"|"Humatrope 6 MG Injection Solution Reconstituted"|"69214"|"Hypopituitarism"|"2"|"0.666667"  
"25295"|"Humatrope 12 MG Injection Solution Reconstituted"|"67687"|"Growth Hormone Deficiency (Pituitary Dwarfism)"|"3"|"0.6"  
"25295"|"Humatrope 12 MG Injection Solution Reconstituted"|"67803"|"Turner Syndrome"|"3"|"1"  
"25297"|"Stromectol 3 MG Oral Tablet"|"77704"|"Scabies"|"2"|"1"  
"25306"|"Aciphex 20 MG Oral Tablet Delayed Release"|"60891"|"Heartburn"|"2"|"0.333333"  
"25306"|"Aciphex 20 MG Oral Tablet Delayed Release"|"60899"|"Abdominal Pain"|"2"|"1"  
"25306"|"Aciphex 20 MG Oral Tablet Delayed Release"|"64680"|"Chronic Reflux Esophagitis"|"4"|"0.333333"  
"25306"|"Aciphex 20 MG Oral Tablet Delayed Release"|"64688"|"Esophageal Reflux"|"11"|"0.392857"  
"25306"|"Aciphex 20 MG Oral Tablet Delayed Release"|"64708"|"Barrett's Esophagus"|"2"|"0.5"  
"25314"|"Apri 0.15-30 MG-MCG Oral Tablet"|"187792"|"Gynecologic Services Contraceptive Management"|"4"|"0.5"  
"25314"|"Apri 0.15-30 MG-MCG Oral Tablet"|"250989"|"Oral Contraceptives"|"4"|"1"  
"25467"|"Carbidopa-Levodopa CR 50-200 MG Oral Tablet Extended Release"|"75080"|"Parkinson's Disease"|"23"|"0.621622"  
"25539"|"Comtan 200 MG Oral Tablet"|"75080"|"Parkinson's Disease"|"15"|"0.75"  
"25692"|"Bisacodyl Laxative 5 MG Oral Tablet Delayed Release"|"166777"|"Constipation"|"3"|"0.6"  
"25701"|"ZyPREXA 15 MG Oral Tablet"|"76232"|"Paranoid Schizophrenia"|"2"|"1"  
"25701"|"ZyPREXA 15 MG Oral Tablet"|"76272"|"Schizoaffective Disorder"|"2"|"1"  
"25702"|"Benzonatate 200 MG Oral Capsule"|"60869"|"Cough"|"83"|"0.614815"  
"25702"|"Benzonatate 200 MG Oral Capsule"|"62578"|"Acute Sinusitis"|"6"|"0.122449"  
"25702"|"Benzonatate 200 MG Oral Capsule"|"62596"|"Common Cold"|"4"|"0.4"  
"25702"|"Benzonatate 200 MG Oral Capsule"|"62598"|"Allergic Rhinitis"|"12"|"0.109091"  
"25702"|"Benzonatate 200 MG Oral Capsule"|"62760"|"Acute Pharyngitis"|"5"|"0.227273"  
"25702"|"Benzonatate 200 MG Oral Capsule"|"62766"|"Acute Viral Pharyngitis"|"2"|"0.4"  
"25702"|"Benzonatate 200 MG Oral Capsule"|"64118"|"Acute Bronchitis"|"24"|"0.436364"  
"25702"|"Benzonatate 200 MG Oral Capsule"|"64119"|"Influenza"|"3"|"0.375"  
"25702"|"Benzonatate 200 MG Oral Capsule"|"77890"|"Upper Respiratory Infection"|"12"|"0.25"  
"25702"|"Benzonatate 200 MG Oral Capsule"|"77891"|"Acute Upper Respiratory Infection"|"88"|"0.633094"  
"25702"|"Benzonatate 200 MG Oral Capsule"|"87587"|"Coughing Up Sputum Yellow"|"2"|"1"  
"25702"|"Benzonatate 200 MG Oral Capsule"|"274533"|"Sore Throat"|"2"|"0.333333"  
"25702"|"Benzonatate 200 MG Oral Capsule"|"277914"|"Acute Bronchitis With Bronchospasm"|"2"|"1"  
"25702"|"Benzonatate 200 MG Oral Capsule"|"297216"|"Acute Nasopharyngitis"|"4"|"0.8"  
"25722"|"Aromasin 25 MG Oral Tablet"|"278808"|"Breast Cancer"|"2"|"1"  
"25725"|"Rhinocort Aqua 32 MCG/ACT Nasal Suspension"|"62586"|"Chronic Maxillary Sinusitis"|"5"|"0.333333"  
"25725"|"Rhinocort Aqua 32 MCG/ACT Nasal Suspension"|"62588"|"Chronic Ethmoidal Sinusitis"|"5"|"0.333333"  
"25725"|"Rhinocort Aqua 32 MCG/ACT Nasal Suspension"|"62597"|"Rhinitis"|"2"|"0.666667"  
"25725"|"Rhinocort Aqua 32 MCG/ACT Nasal Suspension"|"62598"|"Allergic Rhinitis"|"46"|"0.575"  
"25725"|"Rhinocort Aqua 32 MCG/ACT Nasal Suspension"|"62599"|"Allergic Rhinitis Due To Pollen"|"6"|"0.666667"  
"25725"|"Rhinocort Aqua 32 MCG/ACT Nasal Suspension"|"62611"|"Chronic Rhinitis"|"13"|"0.722222"  
"25725"|"Rhinocort Aqua 32 MCG/ACT Nasal Suspension"|"62615"|"Hypertrophied Nasal Turbinate"|"3"|"0.176471"  
"25725"|"Rhinocort Aqua 32 MCG/ACT Nasal Suspension"|"62616"|"Epistaxis"|"2"|"0.222222"  
"25725"|"Rhinocort Aqua 32 MCG/ACT Nasal Suspension"|"87028"|"Nasal Passage Blockage (Stuffiness)"|"3"|"0.75"

"25734"|"Trileptal 300 MG Oral Tablet"|"74988"|"Seizure Disorder"|"5"|"0.2"  
"25734"|"Trileptal 300 MG Oral Tablet"|"75002"|"Partial Complex Psychomotor Seizure With Intractable Seizure"|"3"|"0.272727"  
"25734"|"Trileptal 300 MG Oral Tablet"|"75125"|"Multiple Sclerosis"|"2"|"0.666667"  
"25734"|"Trileptal 300 MG Oral Tablet"|"252566"|"Partial Complex Seizure"|"5"|"0.555556"  
"25735"|"Trileptal 600 MG Oral Tablet"|"74988"|"Seizure Disorder"|"4"|"0.210526"  
"25735"|"Trileptal 600 MG Oral Tablet"|"75001"|"Partial Complex Psychomotor Seizure"|"3"|"0.75"  
"25735"|"Trileptal 600 MG Oral Tablet"|"75002"|"Partial Complex Psychomotor Seizure With Intractable Seizure"|"14"|"0.823529"  
"25756"|"Tikosyn 500 MCG Oral Capsule"|"62916"|"Atrial Fibrillation"|"5"|"1"  
"25779"|"Allegra 180 MG TABS"|"62598"|"Allergic Rhinitis"|"6"|"0.162162"  
"25780"|"Keppra 250 MG Oral Tablet"|"74988"|"Seizure Disorder"|"4"|"0.266667"  
"25781"|"Keppra 500 MG Oral Tablet"|"74988"|"Seizure Disorder"|"15"|"0.176471"  
"25781"|"Keppra 500 MG Oral Tablet"|"74990"|"Convulsive Grand Mal Seizure With Intractable Seizure"|"2"|"0.4"  
"25781"|"Keppra 500 MG Oral Tablet"|"74994"|"Nonconvulsive (Petit Mal) Seizure With Intractable Seizure"|"2"|"1"  
"25781"|"Keppra 500 MG Oral Tablet"|"75001"|"Partial Complex Psychomotor Seizure"|"3"|"0.375"  
"25781"|"Keppra 500 MG Oral Tablet"|"75002"|"Partial Complex Psychomotor Seizure With Intractable Seizure"|"9"|"0.36"  
"25781"|"Keppra 500 MG Oral Tablet"|"252549"|"Generalized Convulsive Tonic Seizure"|"2"|"0.5"  
"25781"|"Keppra 500 MG Oral Tablet"|"252551"|"Generalized Convulsive Tonic-clonic Seizure"|"3"|"0.428571"  
"25781"|"Keppra 500 MG Oral Tablet"|"252566"|"Partial Complex Seizure"|"4"|"0.285714"  
"25781"|"Keppra 500 MG Oral Tablet"|"252570"|"Partial Complex Seizure With Secondary Generalization With Intractable Seizure"|"3"|"0.3"  
"25781"|"Keppra 500 MG Oral Tablet"|"252571"|"Partial Complex Seizure With Memory Disturbances"|"2"|"1"  
"25781"|"Keppra 500 MG Oral Tablet"|"297231"|"Epilepsy"|"3"|"0.230769"  
"25790"|"Evoxic 30 MG Oral Capsule"|"62635"|"Salivary Secretion Disturbance: Xerostomia"|"2"|"0.5"  
"25790"|"Evoxic 30 MG Oral Capsule"|"70455"|"Rheumatoid Arthritis"|"3"|"0.272727"  
"25790"|"Evoxic 30 MG Oral Capsule"|"70472"|"Systemic Lupus Erythematosus"|"5"|"0.5"  
"25790"|"Evoxic 30 MG Oral Capsule"|"70478"|"Sjogren's Syndrome"|"39"|"0.847826"  
"25790"|"Evoxic 30 MG Oral Capsule"|"70479"|"Sicca Syndrome"|"8"|"0.727273"  
"25799"|"Isosorbide Mononitrate CR 120 MG Oral Tablet Extended Release 24 Hour"|"62975"|"Coronary Artery Disease"|"7"|"0.538462"  
"25799"|"Isosorbide Mononitrate CR 120 MG Oral Tablet Extended Release 24 Hour"|"63217"|"Congestive Heart Failure"|"7"|"0.538462"  
"25799"|"Isosorbide Mononitrate CR 120 MG Oral Tablet Extended Release 24 Hour"|"63467"|"Hypertension"|"3"|"0.157895"  
"25799"|"Isosorbide Mononitrate CR 120 MG Oral Tablet Extended Release 24 Hour"|"63468"|"Essential Hypertension"|"2"|"0.222222"  
"25826"|"Zonegran 100 MG Oral Capsule"|"75002"|"Partial Complex Psychomotor Seizure With Intractable Seizure"|"4"|"0.4"  
"25826"|"Zonegran 100 MG Oral Capsule"|"289878"|"Generalized Convulsive Myoclonic Seizure, Juvenile"|"2"|"1"  
"25847"|"Tobramycin Sulfate 0.3 % Ophthalmic Solution"|"61417"|"Conjunctivitis"|"5"|"0.714286"  
"25847"|"Tobramycin Sulfate 0.3 % Ophthalmic Solution"|"61418"|"Acute Conjunctivitis"|"10"|"0.909091"  
"25847"|"Tobramycin Sulfate 0.3 % Ophthalmic Solution"|"287495"|"Acute Conjunctivitis Of The Left Eye"|"5"|"1"  
"25868"|"Tolnaftate 1 % External Cream"|"70124"|"Tinea Corporis"|"2"|"1"  
"25900"|"TraZODone HCl 50 MG Oral Tablet"|"61103"|"Sleep Disturbances"|"28"|"0.823529"  
"25900"|"TraZODone HCl 50 MG Oral Tablet"|"61108"|"Insomnia"|"110"|"0.700637"  
"25900"|"TraZODone HCl 50 MG Oral Tablet"|"61118"|"Anxiety (Symptom)"|"6"|"0.113208"  
"25900"|"TraZODone HCl 50 MG Oral Tablet"|"75835"|"Disruptive Behavior Disorder, Childhood Onset"|"2"|"1"  
"25900"|"TraZODone HCl 50 MG Oral Tablet"|"75929"|"Mood Disorder Due To General Medical Condition"|"5"|"0.555556"  
"25900"|"TraZODone HCl 50 MG Oral Tablet"|"75930"|"Mood Disorder Of Unknown (Axis III) Etiology"|"2"|"0.5"  
"25900"|"TraZODone HCl 50 MG Oral Tablet"|"76213"|"Schizophrenia"|"2"|"1"  
"25900"|"TraZODone HCl 50 MG Oral Tablet"|"76232"|"Paranoid Schizophrenia"|"6"|"0.857143"

"25900"|"TraZODone HCl 50 MG Oral Tablet"|"76245"|"Undifferentiated Schizophrenia"|"2"|"1"  
"25900"|"TraZODone HCl 50 MG Oral Tablet"|"76272"|"Schizoaffective Disorder"|"8"|"0.888889"  
"25900"|"TraZODone HCl 50 MG Oral Tablet"|"76306"|"Episodic Mood Disorders"|"6"|"0.333333"  
"25900"|"TraZODone HCl 50 MG Oral Tablet"|"76325"|"Bipolar I Disorder, Most Recent Episode, Mixed -  
Moderate"|"3"|"0.75"  
"25900"|"TraZODone HCl 50 MG Oral Tablet"|"76348"|"Bipolar II Disorder"|"4"|"0.571429"  
"25900"|"TraZODone HCl 50 MG Oral Tablet"|"76351"|"Depression"|"36"|"0.1875"  
"25900"|"TraZODone HCl 50 MG Oral Tablet"|"76352"|"Major Depression, Single Episode"|"2"|"0.333333"  
"25900"|"TraZODone HCl 50 MG Oral Tablet"|"76357"|"Major Depression, Recurrent"|"24"|"0.5"  
"25900"|"TraZODone HCl 50 MG Oral Tablet"|"76361"|"Moderate Recurrent Major Depression"|"16"|"0.666667"  
"25900"|"TraZODone HCl 50 MG Oral Tablet"|"76363"|"Major Depression, Recurrent With Psychotic  
Features"|"3"|"0.75"  
"25900"|"TraZODone HCl 50 MG Oral Tablet"|"76364"|"Recurrent Major Depression In Partial Remission"|"3"|"0.75"  
"25900"|"TraZODone HCl 50 MG Oral Tablet"|"76383"|"Dysthymic Disorder"|"3"|"0.5"  
"25900"|"TraZODone HCl 50 MG Oral Tablet"|"76388"|"Bipolar Disorder NOS"|"8"|"0.285714"  
"25900"|"TraZODone HCl 50 MG Oral Tablet"|"76392"|"Bipolar Disorder, Manic, With Psychotic Features"|"2"|"1"  
"25900"|"TraZODone HCl 50 MG Oral Tablet"|"76395"|"Primary Insomnia"|"5"|"0.3125"  
"25900"|"TraZODone HCl 50 MG Oral Tablet"|"76536"|"Generalized Anxiety Disorder"|"4"|"0.148148"  
"25900"|"TraZODone HCl 50 MG Oral Tablet"|"76546"|"Obsessive Compulsive Disorder"|"2"|"0.2"  
"25900"|"TraZODone HCl 50 MG Oral Tablet"|"76587"|"Anxiety Disorder NOS"|"8"|"0.285714"  
"25900"|"TraZODone HCl 50 MG Oral Tablet"|"79148"|"Malignant Pancreatic Neoplasm"|"2"|"1"  
"25900"|"TraZODone HCl 50 MG Oral Tablet"|"163354"|"Demonstrated Behavior Psychomotor  
Agitation"|"2"|"0.333333"  
"25900"|"TraZODone HCl 50 MG Oral Tablet"|"196089"|"Adjustment Disorder With Anxiety And Depressed  
Mood"|"3"|"0.333333"  
"25900"|"TraZODone HCl 50 MG Oral Tablet"|"251600"|"Dementia"|"21"|"0.283784"  
"25900"|"TraZODone HCl 50 MG Oral Tablet"|"251627"|"Adjustment Disorder With Depressed Mood"|"4"|"0.571429"  
"25900"|"TraZODone HCl 50 MG Oral Tablet"|"275526"|"Severe Recurrent Major Depression Without Psychotic  
Features"|"2"|"0.666667"  
"25900"|"TraZODone HCl 50 MG Oral Tablet"|"275538"|"Moderate Single Episode Major Depression"|"2"|"1"  
"25900"|"TraZODone HCl 50 MG Oral Tablet"|"275542"|"Persistent Insomnia"|"2"|"0.666667"  
"25900"|"TraZODone HCl 50 MG Oral Tablet"|"275592"|"Post-traumatic Stress Disorder"|"3"|"0.230769"  
"25900"|"TraZODone HCl 50 MG Oral Tablet"|"275604"|"Depression With Anxiety"|"3"|"0.3"  
"25900"|"TraZODone HCl 50 MG Oral Tablet"|"289876"|"Alzheimer's Disease With Behavioral  
Disturbance"|"7"|"0.636364"  
"25920"|"Triamcinolone Acetonide 0.5 % External Cream"|"69710"|"Contact Dermatitis"|"3"|"0.375"  
"25920"|"Triamcinolone Acetonide 0.5 % External Cream"|"69753"|"Eczematoid Dermatitis"|"2"|"1"  
"25920"|"Triamcinolone Acetonide 0.5 % External Cream"|"88375"|"Skin: A Rash"|"4"|"0.8"  
"25920"|"Triamcinolone Acetonide 0.5 % External Cream"|"93705"|"Dermatitis"|"4"|"0.8"  
"25920"|"Triamcinolone Acetonide 0.5 % External Cream"|"278317"|"Dermatitis Due To Contact With Poison  
Ivy"|"4"|"0.8"  
"25920"|"Triamcinolone Acetonide 0.5 % External Cream"|"278350"|"Eczema"|"4"|"0.4"  
"25920"|"Triamcinolone Acetonide 0.5 % External Cream"|"288764"|"Vulvodynia"|"5"|"1"  
"25921"|"Triamcinolone Acetonide 0.5 % External Ointment"|"93705"|"Dermatitis"|"3"|"0.6"  
"25921"|"Triamcinolone Acetonide 0.5 % External Ointment"|"278350"|"Eczema"|"5"|"0.714286"  
"25922"|"Triamcinolone Acetonide 40 MG/ML Injection Suspension"|"62598"|"Allergic Rhinitis"|"4"|"0.142857"  
"25922"|"Triamcinolone Acetonide 40 MG/ML Injection Suspension"|"69710"|"Contact Dermatitis"|"3"|"0.333333"  
"25922"|"Triamcinolone Acetonide 40 MG/ML Injection Suspension"|"70112"|"Atopic Dermatitis"|"5"|"0.277778"  
"25922"|"Triamcinolone Acetonide 40 MG/ML Injection Suspension"|"93705"|"Dermatitis"|"3"|"0.5"  
"25922"|"Triamcinolone Acetonide 40 MG/ML Injection Suspension"|"257996"|"Arthritis"|"2"|"1"  
"25922"|"Triamcinolone Acetonide 40 MG/ML Injection Suspension"|"278317"|"Dermatitis Due To Contact With  
Poison Ivy"|"2"|"1"  
"25922"|"Triamcinolone Acetonide 40 MG/ML Injection Suspension"|"278350"|"Eczema"|"20"|"0.645161"  
"25923"|"Triamcinolone Acetonide 0.1 % Mouth/Throat Paste"|"62678"|"Aphthous Ulcer"|"4"|"1"

"25942"|"Trihexyphenidyl HCl 2 MG Oral Tablet"|"75080"|"Parkinson's Disease"|"4"|"0.8"  
"26116"|"Verapamil HCl 120 MG Oral Tablet"|"63467"|"Hypertension"|"7"|"0.304348"  
"26116"|"Verapamil HCl 120 MG Oral Tablet"|"63468"|"Essential Hypertension"|"4"|"0.4"  
"26116"|"Verapamil HCl 120 MG Oral Tablet"|"63470"|"Benign Essential Hypertension"|"5"|"0.714286"  
"26125"|"Vicodin 5-500 MG Oral Tablet"|"288921"|"Chronic Pain"|"2"|"0.4"  
"26170"|"Vitamin B-12 100 MCG Oral Tablet"|"77962"|"Anemia"|"2"|"0.666667"  
"26177"|"Vitamin B-6 50 MG Oral Tablet"|"77403"|"Latent Tuberculosis"|"8"|"0.727273"  
"26216"|"Warfarin Sodium 10 MG Oral Tablet"|"62916"|"Atrial Fibrillation"|"5"|"0.416667"  
"26216"|"Warfarin Sodium 10 MG Oral Tablet"|"63746"|"Venous Thrombosis"|"2"|"0.666667"  
"26216"|"Warfarin Sodium 10 MG Oral Tablet"|"64277"|"Pulmonary Embolism"|"3"|"0.333333"  
"26216"|"Warfarin Sodium 10 MG Oral Tablet"|"93460"|"Taking Blood Thinners For A Long Time"|"2"|"0.2"  
"26216"|"Warfarin Sodium 10 MG Oral Tablet"|"257802"|"Venous Thrombosis Of The Deep Vessels Of The Lower Extremity"|"2"|"0.333333"  
"26216"|"Warfarin Sodium 10 MG Oral Tablet"|"285039"|"Taking Medication For A Long Time"|"2"|"0.333333"  
"26291"|"Zofran 8 MG Oral Tablet"|"66394"|"Hyperemesis Gravidarum"|"2"|"1"  
"26297"|"Zovirax 5 % External Ointment"|"76781"|"Herpes Simplex"|"4"|"0.571429"  
"26297"|"Zovirax 5 % External Ointment"|"76782"|"Herpes Simplex Type I"|"5"|"0.714286"  
"26297"|"Zovirax 5 % External Ointment"|"76783"|"Herpes Simplex Type II"|"5"|"0.714286"  
"26297"|"Zovirax 5 % External Ointment"|"76786"|"Herpes Simplex Acute Gingivostomatitis"|"3"|"0.75"  
"26297"|"Zovirax 5 % External Ointment"|"76794"|"Herpes Zoster (Shingles)"|"3"|"0.6"  
"26304"|"Acetaminophen 80 MG/0.8ML Oral Suspension"|"77891"|"Acute Upper Respiratory Infection"|"3"|"0.176471"  
"26304"|"Acetaminophen 80 MG/0.8ML Oral Suspension"|"85607"|"Fever (Symptom)"|"4"|"0.5"  
"26304"|"Acetaminophen 80 MG/0.8ML Oral Suspension"|"251528"|"Acute Otitis Media"|"3"|"0.230769"  
"26305"|"Acyclovir 200 MG/5ML Oral Suspension"|"76781"|"Herpes Simplex"|"3"|"1"  
"26306"|"Acyclovir 800 MG Oral Tablet"|"76781"|"Herpes Simplex"|"3"|"0.75"  
"26306"|"Acyclovir 800 MG Oral Tablet"|"76794"|"Herpes Zoster (Shingles)"|"6"|"0.6"  
"26310"|"Amiodarone HCl 200 MG Oral Tablet"|"62891"|"Rhythm Disorder"|"3"|"0.333333"  
"26310"|"Amiodarone HCl 200 MG Oral Tablet"|"62914"|"Atrial Flutter"|"4"|"0.285714"  
"26310"|"Amiodarone HCl 200 MG Oral Tablet"|"62916"|"Atrial Fibrillation"|"40"|"0.421053"  
"26310"|"Amiodarone HCl 200 MG Oral Tablet"|"62917"|"Paroxysmal Atrial Fibrillation"|"3"|"0.272727"  
"26310"|"Amiodarone HCl 200 MG Oral Tablet"|"62947"|"Ventricular Tachycardia"|"7"|"0.368421"  
"26310"|"Amiodarone HCl 200 MG Oral Tablet"|"62975"|"Coronary Artery Disease"|"11"|"0.171875"  
"26310"|"Amiodarone HCl 200 MG Oral Tablet"|"63217"|"Congestive Heart Failure"|"10"|"0.185185"  
"26310"|"Amiodarone HCl 200 MG Oral Tablet"|"63470"|"Benign Essential Hypertension"|"5"|"0.151515"  
"26310"|"Amiodarone HCl 200 MG Oral Tablet"|"282270"|"Palpitations"|"2"|"0.4"  
"26316"|"AzaTHIOprine 50 MG Oral Tablet"|"64294"|"Pulmonary Fibrosis"|"2"|"0.666667"  
"26316"|"AzaTHIOprine 50 MG Oral Tablet"|"64980"|"Crohn's Disease"|"8"|"0.571429"  
"26316"|"AzaTHIOprine 50 MG Oral Tablet"|"65041"|"Ulcerative Colitis"|"2"|"0.5"  
"26316"|"AzaTHIOprine 50 MG Oral Tablet"|"70472"|"Systemic Lupus Erythematosus"|"24"|"0.705882"  
"26316"|"AzaTHIOprine 50 MG Oral Tablet"|"70475"|"Scleroderma"|"7"|"0.466667"  
"26316"|"AzaTHIOprine 50 MG Oral Tablet"|"70598"|"Polymyositis / Dermatomyositis"|"6"|"0.6"  
"26316"|"AzaTHIOprine 50 MG Oral Tablet"|"70599"|"Typical Polymyositis (Type I)"|"6"|"0.857143"  
"26316"|"AzaTHIOprine 50 MG Oral Tablet"|"70600"|"Typical Dermatomyositis (Type II)"|"3"|"0.6"  
"26316"|"AzaTHIOprine 50 MG Oral Tablet"|"70620"|"Sarcoidosis"|"3"|"0.75"  
"26316"|"AzaTHIOprine 50 MG Oral Tablet"|"70637"|"Vasculitides"|"4"|"0.666667"  
"26316"|"AzaTHIOprine 50 MG Oral Tablet"|"70640"|"Wegener's Granulomatosis"|"10"|"0.833333"  
"26316"|"AzaTHIOprine 50 MG Oral Tablet"|"70642"|"Microscopic Polyarteritis Nodosa"|"2"|"0.666667"  
"26316"|"AzaTHIOprine 50 MG Oral Tablet"|"70648"|"Behcet's Syndrome"|"3"|"0.6"  
"26316"|"AzaTHIOprine 50 MG Oral Tablet"|"75127"|"Devic Disease"|"2"|"0.666667"  
"26316"|"AzaTHIOprine 50 MG Oral Tablet"|"75358"|"Cerebral Vasculitis"|"2"|"1"  
"26316"|"AzaTHIOprine 50 MG Oral Tablet"|"75617"|"Chronic Inflammatory Demyelinating Polyneuropathy"|"2"|"0.5"  
"26316"|"AzaTHIOprine 50 MG Oral Tablet"|"75733"|"Myasthenia Gravis"|"9"|"1"

"26316"|"AzaTHIOprine 50 MG Oral Tablet"|"77924"|"Idiopathic Thrombocytopenic Purpura"|"2"|"1"  
"26316"|"AzaTHIOprine 50 MG Oral Tablet"|"277913"|"Chronic Interstitial Lung Disease"|"3"|"0.75"  
"26318"|"Benazepril HCl 10 MG Oral Tablet"|"63467"|"Hypertension"|"8"|"0.421053"  
"26318"|"Benazepril HCl 10 MG Oral Tablet"|"63468"|"Essential Hypertension"|"7"|"0.466667"  
"26318"|"Benazepril HCl 10 MG Oral Tablet"|"63470"|"Benign Essential Hypertension"|"6"|"0.545455"  
"26323"|"Bromocriptine Mesylate 2.5 MG Oral Tablet"|"69200"|"Pituitary Prolactinoma"|"3"|"0.375"  
"26323"|"Bromocriptine Mesylate 2.5 MG Oral Tablet"|"69201"|"Prolactinoma Microadenoma"|"2"|"1"  
"26323"|"Bromocriptine Mesylate 2.5 MG Oral Tablet"|"69202"|"Prolactinoma Macroadenoma"|"2"|"1"  
"26323"|"Bromocriptine Mesylate 2.5 MG Oral Tablet"|"278177"|"Hyperprolactinemia"|"9"|"0.75"  
"26329"|"BuPROPion HCl 100 MG Oral Tablet"|"76351"|"Depression"|"6"|"0.428571"  
"26338"|"Calcium Carbonate Antacid 500 MG Oral Tablet Chewable"|"274672"|"Chronic Kidney Disease, Stage 4"|"3"|"1"  
"26344"|"Captopril 12.5 MG Oral Tablet"|"63467"|"Hypertension"|"2"|"1"  
"26345"|"Captopril 50 MG Oral Tablet"|"70475"|"Scleroderma"|"2"|"1"  
"26346"|"Carbidopa-Levodopa 10-100 MG Oral Tablet"|"75080"|"Parkinson's Disease"|"3"|"0.214286"  
"26346"|"Carbidopa-Levodopa 10-100 MG Oral Tablet"|"293598"|"Parkinsonism"|"3"|"0.75"  
"26347"|"Carbidopa-Levodopa 25-100 MG Oral Tablet"|"75080"|"Parkinson's Disease"|"79"|"0.731481"  
"26347"|"Carbidopa-Levodopa 25-100 MG Oral Tablet"|"252575"|"Dementia With Lewy Bodies"|"6"|"0.666667"  
"26347"|"Carbidopa-Levodopa 25-100 MG Oral Tablet"|"252576"|"Focal Torsion Dystonia"|"3"|"0.75"  
"26347"|"Carbidopa-Levodopa 25-100 MG Oral Tablet"|"289885"|"Parkinsonism (Secondary)"|"3"|"0.5"  
"26347"|"Carbidopa-Levodopa 25-100 MG Oral Tablet"|"292509"|"Multisystem Atrophy"|"4"|"0.571429"  
"26347"|"Carbidopa-Levodopa 25-100 MG Oral Tablet"|"293598"|"Parkinsonism"|"3"|"0.75"  
"26348"|"Carbidopa-Levodopa 25-250 MG Oral Tablet"|"75080"|"Parkinson's Disease"|"17"|"0.73913"  
"26348"|"Carbidopa-Levodopa 25-250 MG Oral Tablet"|"289885"|"Parkinsonism (Secondary)"|"2"|"1"  
"26354"|"Cholestyramine 4 GM Oral Packet"|"60902"|"Diarrhea (Symptom)"|"2"|"0.5"  
"26354"|"Cholestyramine 4 GM Oral Packet"|"67970"|"Hyperlipidemia"|"5"|"0.3125"  
"26355"|"Cholestyramine 4 GM/DOSE Oral Powder"|"64978"|"Short Bowel Syndrome"|"2"|"1"  
"26361"|"Clobetasol Propionate 0.05 % External Cream"|"69805"|"Lichen Sclerosus Et Atrophicus"|"4"|"0.8"  
"26361"|"Clobetasol Propionate 0.05 % External Cream"|"69901"|"Psoriasis"|"2"|"0.285714"  
"26361"|"Clobetasol Propionate 0.05 % External Cream"|"288764"|"Vulvodynia"|"5"|"0.833333"  
"26363"|"ClomiPRAMINE HCl 25 MG Oral Capsule"|"76546"|"Obsessive Compulsive Disorder"|"3"|"1"  
"26365"|"Clonazepam 1 MG Oral Tablet"|"61108"|"Insomnia"|"5"|"0.178571"  
"26365"|"Clonazepam 1 MG Oral Tablet"|"61118"|"Anxiety (Symptom)"|"26"|"0.634146"  
"26365"|"Clonazepam 1 MG Oral Tablet"|"74988"|"Seizure Disorder"|"5"|"0.185185"  
"26365"|"Clonazepam 1 MG Oral Tablet"|"74990"|"Convulsive Grand Mal Seizure With Intractable Seizure"|"2"|"1"  
"26365"|"Clonazepam 1 MG Oral Tablet"|"75002"|"Partial Complex Psychomotor Seizure With Intractable Seizure"|"4"|"0.8"  
"26365"|"Clonazepam 1 MG Oral Tablet"|"75054"|"Restless Legs Syndrome"|"7"|"0.5"  
"26365"|"Clonazepam 1 MG Oral Tablet"|"75080"|"Parkinson's Disease"|"4"|"0.190476"  
"26365"|"Clonazepam 1 MG Oral Tablet"|"75125"|"Multiple Sclerosis"|"4"|"0.25"  
"26365"|"Clonazepam 1 MG Oral Tablet"|"76325"|"Bipolar I Disorder, Most Recent Episode, Mixed - Moderate"|"2"|"1"  
"26365"|"Clonazepam 1 MG Oral Tablet"|"76348"|"Bipolar II Disorder"|"3"|"0.333333"  
"26365"|"Clonazepam 1 MG Oral Tablet"|"76351"|"Depression"|"10"|"0.138889"  
"26365"|"Clonazepam 1 MG Oral Tablet"|"76357"|"Major Depression, Recurrent"|"6"|"0.25"  
"26365"|"Clonazepam 1 MG Oral Tablet"|"76361"|"Moderate Recurrent Major Depression"|"2"|"0.333333"  
"26365"|"Clonazepam 1 MG Oral Tablet"|"76366"|"Chronic Major Depression"|"2"|"0.4"  
"26365"|"Clonazepam 1 MG Oral Tablet"|"76388"|"Bipolar Disorder NOS"|"6"|"0.6"  
"26365"|"Clonazepam 1 MG Oral Tablet"|"76536"|"Generalized Anxiety Disorder"|"17"|"0.607143"  
"26365"|"Clonazepam 1 MG Oral Tablet"|"76537"|"Panic Disorder Without Agoraphobia"|"7"|"0.291667"  
"26365"|"Clonazepam 1 MG Oral Tablet"|"76538"|"Panic Disorder With Agoraphobia"|"5"|"0.833333"  
"26365"|"Clonazepam 1 MG Oral Tablet"|"76587"|"Anxiety Disorder NOS"|"16"|"0.64"  
"26365"|"Clonazepam 1 MG Oral Tablet"|"76680"|"Adjustment Disorder With Anxiety"|"5"|"0.833333"  
"26365"|"Clonazepam 1 MG Oral Tablet"|"165548"|"Tremor"|"2"|"0.5"

"26365"|"Clonazepam 1 MG Oral Tablet"|"196089"|"Adjustment Disorder With Anxiety And Depressed Mood"|"5"|"0.833333"

"26365"|"Clonazepam 1 MG Oral Tablet"|"275590"|"Organic REM Sleep Behavior Disorder"|"2"|"1"

"26365"|"Clonazepam 1 MG Oral Tablet"|"275592"|"Post-traumatic Stress Disorder"|"4"|"0.333333"

"26365"|"Clonazepam 1 MG Oral Tablet"|"275604"|"Depression With Anxiety"|"4"|"0.666667"

"26365"|"Clonazepam 1 MG Oral Tablet"|"297231"|"Epilepsy"|"2"|"0.25"

"26366"|"Clonazepam 2 MG Oral Tablet"|"61108"|"Insomnia"|"2"|"0.5"

"26366"|"Clonazepam 2 MG Oral Tablet"|"75054"|"Restless Legs Syndrome"|"2"|"1"

"26366"|"Clonazepam 2 MG Oral Tablet"|"76587"|"Anxiety Disorder NOS"|"2"|"0.666667"

"26366"|"Clonazepam 2 MG Oral Tablet"|"275604"|"Depression With Anxiety"|"2"|"0.5"

"26370"|"Colistimethate Sodium 150 MG Injection Solution Reconstituted"|"62587"|"Chronic Frontal Sinusitis"|"2"|"0.666667"

"26370"|"Colistimethate Sodium 150 MG Injection Solution Reconstituted"|"62588"|"Chronic Ethmoidal Sinusitis"|"2"|"0.5"

"26372"|"Cyclophosphamide 50 MG Oral Tablet"|"80831"|"Adenocarcinoma Of The Prostate Gland"|"2"|"0.4"

"26372"|"Cyclophosphamide 50 MG Oral Tablet"|"278812"|"Prostate Cancer"|"13"|"0.684211"

"26374"|"CycloSPORINE 100 MG Oral Capsule"|"34588"|"Proteinuria"|"2"|"0.5"

"26380"|"Desoximetasone 0.25 % External Ointment"|"278350"|"Eczema"|"2"|"1"

"26396"|"Etodolac 400 MG Oral Tablet"|"70146"|"Osteoarthritis"|"2"|"0.666667"

"26396"|"Etodolac 400 MG Oral Tablet"|"70455"|"Rheumatoid Arthritis"|"6"|"1"

"26398"|"Fluconazole 100 MG Oral Tablet"|"65762"|"Urinary Tract Infection"|"2"|"0.333333"

"26398"|"Fluconazole 100 MG Oral Tablet"|"66214"|"Candida Albicans Vaginitis"|"2"|"1"

"26398"|"Fluconazole 100 MG Oral Tablet"|"76842"|"Acquired Immunodeficiency Syndrome (AIDS)"|"2"|"0.285714"

"26398"|"Fluconazole 100 MG Oral Tablet"|"77206"|"Oral Thrush"|"5"|"0.714286"

"26398"|"Fluconazole 100 MG Oral Tablet"|"77207"|"Esophageal Candidiasis"|"2"|"0.666667"

"26398"|"Fluconazole 100 MG Oral Tablet"|"77216"|"Genitourinary Candidiasis"|"2"|"1"

"26398"|"Fluconazole 100 MG Oral Tablet"|"79148"|"Malignant Pancreatic Neoplasm"|"2"|"1"

"26398"|"Fluconazole 100 MG Oral Tablet"|"173522"|"Candidal Intertrigo"|"3"|"1"

"26403"|"GlipiZIDE 10 MG Oral Tablet"|"69380"|"Diabetes Mellitus"|"26"|"0.295455"

"26403"|"GlipiZIDE 10 MG Oral Tablet"|"69381"|"Type II Diabetes Mellitus"|"17"|"0.34"

"26403"|"GlipiZIDE 10 MG Oral Tablet"|"69382"|"Type II Diabetes Mellitus - Uncomplicated, Uncontrolled"|"4"|"0.235294"

"26403"|"GlipiZIDE 10 MG Oral Tablet"|"69402"|"Diabetes Mellitus Poorly Controlled"|"16"|"0.444444"

"26403"|"GlipiZIDE 10 MG Oral Tablet"|"258942"|"Type II Diabetes Mellitus - Uncomplicated, Controlled"|"3"|"0.428571"

"26404"|"GlipiZIDE 5 MG Oral Tablet"|"69380"|"Diabetes Mellitus"|"43"|"0.477778"

"26404"|"GlipiZIDE 5 MG Oral Tablet"|"69381"|"Type II Diabetes Mellitus"|"16"|"0.390244"

"26404"|"GlipiZIDE 5 MG Oral Tablet"|"69382"|"Type II Diabetes Mellitus - Uncomplicated, Uncontrolled"|"7"|"0.35"

"26404"|"GlipiZIDE 5 MG Oral Tablet"|"69402"|"Diabetes Mellitus Poorly Controlled"|"10"|"0.416667"

"26405"|"GlyBURIDE 2.5 MG Oral Tablet"|"66433"|"Pregnancy Complicated By Diabetes Mellitus"|"6"|"0.857143"

"26405"|"GlyBURIDE 2.5 MG Oral Tablet"|"69380"|"Diabetes Mellitus"|"14"|"0.388889"

"26405"|"GlyBURIDE 2.5 MG Oral Tablet"|"69381"|"Type II Diabetes Mellitus"|"7"|"0.28"

"26405"|"GlyBURIDE 2.5 MG Oral Tablet"|"69382"|"Type II Diabetes Mellitus - Uncomplicated, Uncontrolled"|"4"|"0.571429"

"26405"|"GlyBURIDE 2.5 MG Oral Tablet"|"69395"|"Gestational Diabetes Mellitus"|"6"|"0.857143"

"26405"|"GlyBURIDE 2.5 MG Oral Tablet"|"69401"|"Diabetes Mellitus Under Control"|"3"|"0.6"

"26405"|"GlyBURIDE 2.5 MG Oral Tablet"|"69402"|"Diabetes Mellitus Poorly Controlled"|"3"|"0.333333"

"26406"|"GuaiFENesin 200 MG Oral Tablet"|"60869"|"Cough"|"2"|"0.333333"

"26406"|"GuaiFENesin 200 MG Oral Tablet"|"77891"|"Acute Upper Respiratory Infection"|"14"|"0.736842"

"26408"|"GuanFACINE HCl 1 MG Oral Tablet"|"75818"|"Attention-deficit Hyperactivity Disorder"|"6"|"0.857143"

"26408"|"GuanFACINE HCl 1 MG Oral Tablet"|"252543"|"Encephalopathy"|"2"|"0.333333"

"26408"|"GuanFACINE HCl 1 MG Oral Tablet"|"275486"|"ADHD, Combined Type"|"13"|"0.8125"

"26408"|"GuanFACINE HCl 1 MG Oral Tablet"|"275492"|"ADHD, Predominantly Hyperactive - Impulsive"|"3"|"0.75"

"26409"|"GuanFACINE HCl 2 MG Oral Tablet"|"63468"|"Essential Hypertension"|"2"|"1"  
"26410"|"Haloperidol Decanoate 100 MG/ML Intramuscular Solution"|"76232"|"Paranoid Schizophrenia"|"2"|"0.666667"  
"26410"|"Haloperidol Decanoate 100 MG/ML Intramuscular Solution"|"76237"|"Paranoid Schizophrenia In Remission"|"2"|"1"  
"26410"|"Haloperidol Decanoate 100 MG/ML Intramuscular Solution"|"76272"|"Schizoaffective Disorder"|"2"|"0.666667"  
"26416"|"Hydrocortisone Valerate 0.2 % External Ointment"|"278350"|"Eczema"|"3"|"1"  
"26416"|"Hydrocortisone Valerate 0.2 % External Ointment"|"298801"|"Dyshidrotic Eczema"|"2"|"1"  
"26421"|"Isosorbide Mononitrate 10 MG Oral Tablet"|"62975"|"Coronary Artery Disease"|"2"|"0.666667"  
"26422"|"Ketoconazole 200 MG Oral Tablet"|"70124"|"Tinea Corporis"|"2"|"0.285714"  
"26422"|"Ketoconazole 200 MG Oral Tablet"|"70126"|"Tinea Versicolor"|"17"|"0.772727"  
"26422"|"Ketoconazole 200 MG Oral Tablet"|"80830"|"Malignant Neoplasm Of The Prostate Gland"|"4"|"0.8"  
"26422"|"Ketoconazole 200 MG Oral Tablet"|"80831"|"Adenocarcinoma Of The Prostate Gland"|"3"|"0.25"  
"26422"|"Ketoconazole 200 MG Oral Tablet"|"181267"|"Carcinoma Of The Prostate Gland"|"2"|"1"  
"26422"|"Ketoconazole 200 MG Oral Tablet"|"278812"|"Prostate Cancer"|"43"|"0.754386"  
"26432"|"Magnesium Oxide 400 MG Oral Tablet"|"292316"|"Gitelman's Syndrome"|"2"|"1"  
"26433"|"Methimazole 10 MG Oral Tablet"|"69231"|"Hyperthyroidism"|"32"|"0.695652"  
"26433"|"Methimazole 10 MG Oral Tablet"|"69234"|"Graves' Disease"|"28"|"0.595745"  
"26433"|"Methimazole 10 MG Oral Tablet"|"69237"|"Toxic Nodular Goiter"|"2"|"0.5"  
"26433"|"Methimazole 10 MG Oral Tablet"|"69294"|"Solitary Thyroid Nodule"|"2"|"0.4"  
"26434"|"Methimazole 5 MG Oral Tablet"|"69231"|"Hyperthyroidism"|"17"|"0.772727"  
"26434"|"Methimazole 5 MG Oral Tablet"|"69234"|"Graves' Disease"|"9"|"0.642857"  
"26443"|"Naproxen 125 MG/5ML Oral Suspension"|"278685"|"Arthralgias In Multiple Sites"|"2"|"0.666667"  
"26452"|"Oxybutynin Chloride 5 MG/5ML Oral Syrup"|"65769"|"Neurogenic Bladder"|"3"|"1"  
"26457"|"Permethrin 5 % External Cream"|"61029"|"Itching (Pruritus)"|"3"|"0.5"  
"26457"|"Permethrin 5 % External Cream"|"77704"|"Scabies"|"91"|"0.798246"  
"26457"|"Permethrin 5 % External Cream"|"77807"|"Pediculosis"|"3"|"1"  
"26457"|"Permethrin 5 % External Cream"|"88375"|"Skin: A Rash"|"3"|"0.375"  
"26465"|"PrednisoLONE 15 MG/5ML Oral Syrup"|"60874"|"Wheezing"|"4"|"0.2"  
"26465"|"PrednisoLONE 15 MG/5ML Oral Syrup"|"64180"|"Reactive Airway Disease"|"7"|"0.318182"  
"26465"|"PrednisoLONE 15 MG/5ML Oral Syrup"|"64181"|"Asthma"|"16"|"0.202532"  
"26465"|"PrednisoLONE 15 MG/5ML Oral Syrup"|"64202"|"Bronchiolitis"|"6"|"0.333333"  
"26465"|"PrednisoLONE 15 MG/5ML Oral Syrup"|"65674"|"Nephrotic Syndrome"|"2"|"0.5"  
"26465"|"PrednisoLONE 15 MG/5ML Oral Syrup"|"69214"|"Hypopituitarism"|"4"|"0.8"  
"26465"|"PrednisoLONE 15 MG/5ML Oral Syrup"|"69464"|"Congenital Adrenal Hyperplasia"|"10"|"0.909091"  
"26465"|"PrednisoLONE 15 MG/5ML Oral Syrup"|"69465"|"21-hydroxylase Deficiency (Salt Losing)"|"2"|"0.5"  
"26465"|"PrednisoLONE 15 MG/5ML Oral Syrup"|"166748"|"Asthma With Acute Exacerbation"|"4"|"0.222222"  
"26465"|"PrednisoLONE 15 MG/5ML Oral Syrup"|"258832"|"Cough Variant Asthma"|"2"|"0.5"  
"26465"|"PrednisoLONE 15 MG/5ML Oral Syrup"|"277913"|"Chronic Interstitial Lung Disease"|"2"|"0.4"  
"26468"|"Propranolol-HCTZ 80-25 MG Oral Tablet"|"63467"|"Hypertension"|"2"|"1"  
"26470"|"Ranitidine HCl 150 MG Oral Capsule"|"60891"|"Heartburn"|"3"|"1"  
"26470"|"Ranitidine HCl 150 MG Oral Capsule"|"60899"|"Abdominal Pain"|"3"|"0.6"  
"26470"|"Ranitidine HCl 150 MG Oral Capsule"|"64688"|"Esophageal Reflux"|"8"|"0.470588"  
"26472"|"Ranitidine HCl 300 MG Oral Tablet"|"64688"|"Esophageal Reflux"|"2"|"0.285714"  
"26474"|"Rifampin 150 MG Oral Capsule"|"60869"|"Cough"|"2"|"1"  
"26480"|"Sucralfate 1 GM/10ML Oral Suspension"|"64688"|"Esophageal Reflux"|"4"|"0.8"  
"26481"|"Sucralfate 1 GM Oral Tablet"|"64680"|"Chronic Reflux Esophagitis"|"2"|"0.5"  
"26481"|"Sucralfate 1 GM Oral Tablet"|"64688"|"Esophageal Reflux"|"7"|"0.388889"  
"26481"|"Sucralfate 1 GM Oral Tablet"|"64763"|"Gastritis"|"2"|"0.2"  
"26481"|"Sucralfate 1 GM Oral Tablet"|"64825"|"Peptic Ulcer"|"2"|"0.666667"  
"26484"|"Tamoxifen Citrate 20 MG Oral Tablet"|"179542"|"Malignant Breast Neoplasm"|"2"|"0.666667"  
"26484"|"Tamoxifen Citrate 20 MG Oral Tablet"|"278808"|"Breast Cancer"|"9"|"0.529412"  
"26485"|"Temazepam 7.5 MG Oral Capsule"|"61108"|"Insomnia"|"11"|"0.916667"

"26492"|"TraZODone HCl 300 MG Oral Tablet"|"76351"|"Depression"|"2"|"0.5"  
"26492"|"TraZODone HCl 300 MG Oral Tablet"|"76357"|"Major Depression, Recurrent"|"2"|"1"  
"26493"|"Tretinoin 0.025 % External Cream"|"69606"|"Acne"|"9"|"0.5"  
"26493"|"Tretinoin 0.025 % External Cream"|"69607"|"Acne Vulgaris"|"4"|"1"  
"26494"|"Tretinoin 0.025 % External Gel"|"69606"|"Acne"|"7"|"0.875"  
"26494"|"Tretinoin 0.025 % External Gel"|"69607"|"Acne Vulgaris"|"8"|"1"  
"26496"|"Polymyxin B-Trimethoprim 10000-0.1 UNIT/ML-% Ophthalmic Solution"|"61417"|"Conjunctivitis"|"3"|"0.375"  
"26496"|"Polymyxin B-Trimethoprim 10000-0.1 UNIT/ML-% Ophthalmic Solution"|"61418"|"Acute Conjunctivitis"|"6"|"0.545455"  
"26496"|"Polymyxin B-Trimethoprim 10000-0.1 UNIT/ML-% Ophthalmic Solution"|"166478"|"Acute Bacterial Conjunctivitis"|"10"|"1"  
"26496"|"Polymyxin B-Trimethoprim 10000-0.1 UNIT/ML-% Ophthalmic Solution"|"287562"|"Acute Conjunctivitis Of Both Eyes"|"3"|"1"  
"26501"|"Warfarin Sodium 1 MG Oral Tablet"|"62916"|"Atrial Fibrillation"|"10"|"0.416667"  
"26501"|"Warfarin Sodium 1 MG Oral Tablet"|"63217"|"Congestive Heart Failure"|"3"|"0.375"  
"26501"|"Warfarin Sodium 1 MG Oral Tablet"|"64277"|"Pulmonary Embolism"|"2"|"0.333333"  
"26501"|"Warfarin Sodium 1 MG Oral Tablet"|"80830"|"Malignant Neoplasm Of The Prostate Gland"|"3"|"0.75"  
"26501"|"Warfarin Sodium 1 MG Oral Tablet"|"278812"|"Prostate Cancer"|"28"|"0.777778"  
"26544"|"Butalbital-APAP-Caffeine 50-325-40 MG Oral Capsule"|"60828"|"Headache"|"2"|"0.666667"  
"26544"|"Butalbital-APAP-Caffeine 50-325-40 MG Oral Capsule"|"74533"|"Migraine Headache"|"2"|"0.333333"  
"26571"|"Doc-Q-Lace 100 MG Oral Capsule"|"166777"|"Constipation"|"4"|"0.571429"  
"26582"|"Diltiazem HCl CR 120 MG Oral Capsule Extended Release 12 Hour"|"63467"|"Hypertension"|"2"|"0.4"  
"26582"|"Diltiazem HCl CR 120 MG Oral Capsule Extended Release 12 Hour"|"63468"|"Essential Hypertension"|"2"|"1"  
"26598"|"Robafen AC 100-10 MG/5ML Oral Syrup"|"60869"|"Cough"|"6"|"0.857143"  
"26608"|"Guaiatussin AC 100-10 MG/5ML Oral Syrup"|"60869"|"Cough"|"3"|"1"  
"26608"|"Guaiatussin AC 100-10 MG/5ML Oral Syrup"|"64118"|"Acute Bronchitis"|"3"|"0.6"  
"26619"|"Meclizine HCl 12.5 MG Oral Tablet"|"61038"|"Dizziness"|"21"|"0.567568"  
"26619"|"Meclizine HCl 12.5 MG Oral Tablet"|"75490"|"Benign Paroxysmal Positional Vertigo"|"9"|"0.692308"  
"26619"|"Meclizine HCl 12.5 MG Oral Tablet"|"75493"|"Vertigo Of Central Origin"|"2"|"0.5"  
"26619"|"Meclizine HCl 12.5 MG Oral Tablet"|"252601"|"Vertigo"|"19"|"0.730769"  
"26620"|"Meclizine HCl 25 MG Oral Tablet"|"60894"|"Nausea (Symptom)"|"2"|"0.285714"  
"26620"|"Meclizine HCl 25 MG Oral Tablet"|"61038"|"Dizziness"|"20"|"0.526316"  
"26620"|"Meclizine HCl 25 MG Oral Tablet"|"62510"|"Labyrinthitis"|"3"|"1"  
"26620"|"Meclizine HCl 25 MG Oral Tablet"|"75490"|"Benign Paroxysmal Positional Vertigo"|"19"|"0.730769"  
"26620"|"Meclizine HCl 25 MG Oral Tablet"|"87702"|"Nausea With Vomiting"|"2"|"0.4"  
"26620"|"Meclizine HCl 25 MG Oral Tablet"|"252601"|"Vertigo"|"38"|"0.716981"  
"26636"|"RisperDAL 1 MG Oral Tablet"|"30261"|"Bipolar I Disorder, Most Recent Episode, Depressed - Severe With Psychotic Features"|"2"|"1"  
"26636"|"RisperDAL 1 MG Oral Tablet"|"76212"|"Psychosis"|"2"|"1"  
"26636"|"RisperDAL 1 MG Oral Tablet"|"76351"|"Depression"|"2"|"0.333333"  
"26642"|"Theophylline CR 200 MG Oral Tablet Extended Release 12 Hour"|"64181"|"Asthma"|"4"|"1"  
"26704"|"Estradiol 0.5 MG Oral Tablet"|"60977"|"Menopause Has Occurred"|"2"|"0.666667"  
"26704"|"Estradiol 0.5 MG Oral Tablet"|"66076"|"Menopausal Disorder"|"2"|"0.666667"  
"26704"|"Estradiol 0.5 MG Oral Tablet"|"93473"|"Taking Female Hormones For Postmenopausal HRT"|"3"|"0.5"  
"26704"|"Estradiol 0.5 MG Oral Tablet"|"195794"|"Symptomatic Menopause"|"8"|"0.888889"  
"26785"|"Accu-Chek Advantage Test In Vitro Strip"|"69381"|"Type II Diabetes Mellitus"|"2"|"0.666667"  
"26805"|"Triamterene-HCTZ 37.5-25 MG Oral Capsule"|"63232"|"Benign Hypertensive Heart Disease"|"2"|"1"  
"26805"|"Triamterene-HCTZ 37.5-25 MG Oral Capsule"|"63467"|"Hypertension"|"50"|"0.423729"  
"26805"|"Triamterene-HCTZ 37.5-25 MG Oral Capsule"|"63468"|"Essential Hypertension"|"23"|"0.442308"  
"26805"|"Triamterene-HCTZ 37.5-25 MG Oral Capsule"|"63470"|"Benign Essential Hypertension"|"22"|"0.468085"  
"26820"|"DiphenhydrAMINE Cough 12.5 MG/5ML SYRP"|"69847"|"Papular Urticaria"|"2"|"0.666667"  
"26838"|"Glycopyrrolate Powder"|"292064"|"Dysphagia"|"2"|"0.4"

"26898"|"Verapamil HCl CR 240 MG Oral Tablet Extended Release"|"63467"|"Hypertension"|"9"|"0.391304"  
"26898"|"Verapamil HCl CR 240 MG Oral Tablet Extended Release"|"63468"|"Essential Hypertension"|"2"|"0.222222"  
"26898"|"Verapamil HCl CR 240 MG Oral Tablet Extended Release"|"63470"|"Benign Essential  
Hypertension"|"2"|"0.285714"  
"26957"|"Verapamil HCl CR 120 MG Oral Tablet Extended Release"|"63467"|"Hypertension"|"3"|"0.428571"  
"26957"|"Verapamil HCl CR 120 MG Oral Tablet Extended Release"|"63468"|"Essential Hypertension"|"3"|"0.6"  
"27138"|"Potassium Chloride CR 10 MEQ Oral Capsule Extended Release"|"63217"|"Congestive Heart  
Failure"|"5"|"0.277778"  
"27138"|"Potassium Chloride CR 10 MEQ Oral Capsule Extended Release"|"63467"|"Hypertension"|"6"|"0.139535"  
"27138"|"Potassium Chloride CR 10 MEQ Oral Capsule Extended Release"|"63468"|"Essential  
Hypertension"|"3"|"0.1875"  
"27138"|"Potassium Chloride CR 10 MEQ Oral Capsule Extended Release"|"63470"|"Benign Essential  
Hypertension"|"10"|"0.277778"  
"27138"|"Potassium Chloride CR 10 MEQ Oral Capsule Extended Release"|"68089"|"Hypokalemia"|"6"|"0.5"  
"27138"|"Potassium Chloride CR 10 MEQ Oral Capsule Extended Release"|"75811"|"Muscle Spasm"|"2"|"0.4"  
"27138"|"Potassium Chloride CR 10 MEQ Oral Capsule Extended Release"|"274669"|"Chronic Renal  
Insufficiency"|"2"|"0.666667"  
"27138"|"Potassium Chloride CR 10 MEQ Oral Capsule Extended Release"|"282680"|"Edema"|"2"|"0.333333"  
"27281"|"Levoxyl 25 MCG Oral Tablet"|"69258"|"Hypothyroidism"|"7"|"0.538462"  
"27281"|"Levoxyl 25 MCG Oral Tablet"|"69259"|"Primary Hypothyroidism"|"2"|"1"  
"27282"|"Levoxyl 50 MCG Oral Tablet"|"69258"|"Hypothyroidism"|"26"|"0.577778"  
"27283"|"Levoxyl 75 MCG Oral Tablet"|"69214"|"Hypopituitarism"|"2"|"0.666667"  
"27283"|"Levoxyl 75 MCG Oral Tablet"|"69258"|"Hypothyroidism"|"27"|"0.613636"  
"27283"|"Levoxyl 75 MCG Oral Tablet"|"69266"|"Congenital Hypothyroidism"|"3"|"1"  
"27284"|"Levoxyl 125 MCG Oral Tablet"|"69258"|"Hypothyroidism"|"24"|"0.705882"  
"27286"|"Levoxyl 175 MCG Oral Tablet"|"69258"|"Hypothyroidism"|"8"|"0.571429"  
"27287"|"Levoxyl 112 MCG Oral Tablet"|"69258"|"Hypothyroidism"|"18"|"0.529412"  
"27288"|"Levoxyl 137 MCG Oral Tablet"|"69258"|"Hypothyroidism"|"11"|"0.916667"  
"27336"|"Eucerin External Cream"|"69964"|"Xerosis Cutis"|"3"|"1"  
"27336"|"Eucerin External Cream"|"70112"|"Atopic Dermatitis"|"2"|"0.5"  
"27336"|"Eucerin External Cream"|"278350"|"Eczema"|"8"|"0.727273"  
"27385"|"E.E.S. Granules 200 MG/5ML Oral Suspension Reconstituted"|"64748"|"Gastroparesis"|"2"|"0.5"  
"27400"|"LaMICtal 100 MG Oral Tablet"|"74988"|"Seizure Disorder"|"7"|"0.225806"  
"27400"|"LaMICtal 100 MG Oral Tablet"|"74997"|"Partial Simple Seizure"|"2"|"1"  
"27400"|"LaMICtal 100 MG Oral Tablet"|"75001"|"Partial Complex Psychomotor Seizure"|"3"|"0.6"  
"27400"|"LaMICtal 100 MG Oral Tablet"|"75002"|"Partial Complex Psychomotor Seizure With Intractable  
Seizure"|"6"|"0.428571"  
"27400"|"LaMICtal 100 MG Oral Tablet"|"76357"|"Major Depression, Recurrent"|"2"|"0.666667"  
"27400"|"LaMICtal 100 MG Oral Tablet"|"252546"|"Generalized Convulsive Seizure"|"2"|"0.4"  
"27400"|"LaMICtal 100 MG Oral Tablet"|"252566"|"Partial Complex Seizure"|"2"|"0.25"  
"27400"|"LaMICtal 100 MG Oral Tablet"|"252570"|"Partial Complex Seizure With Secondary Generalization With  
Intractable Seizure"|"3"|"0.375"  
"27400"|"LaMICtal 100 MG Oral Tablet"|"297231"|"Epilepsy"|"5"|"0.454545"  
"27401"|"LaMICtal 150 MG Oral Tablet"|"75002"|"Partial Complex Psychomotor Seizure With Intractable  
Seizure"|"4"|"0.571429"  
"27402"|"LaMICtal 200 MG Oral Tablet"|"75002"|"Partial Complex Psychomotor Seizure With Intractable  
Seizure"|"9"|"0.75"  
"27402"|"LaMICtal 200 MG Oral Tablet"|"76307"|"Bipolar Disorder"|"4"|"0.25"  
"27402"|"LaMICtal 200 MG Oral Tablet"|"252546"|"Generalized Convulsive Seizure"|"3"|"0.6"  
"27402"|"LaMICtal 200 MG Oral Tablet"|"252550"|"Generalized Convulsive Tonic Seizure With Intractable  
Seizure"|"2"|"1"  
"27402"|"LaMICtal 200 MG Oral Tablet"|"252552"|"Generalized Convulsive Tonic-clonic Seizure With Intractable  
Seizure"|"2"|"0.666667"  
"27402"|"LaMICtal 200 MG Oral Tablet"|"252566"|"Partial Complex Seizure"|"2"|"0.4"

"27402"|"LaMICtal 200 MG Oral Tablet"|"289878"|"Generalized Convulsive Myoclonic Seizure, Juvenile"|"2"|"0.666667"  
"27447"|"LaMICtal 25 MG Oral Tablet"|"74988"|"Seizure Disorder"|"3"|"0.157895"  
"27447"|"LaMICtal 25 MG Oral Tablet"|"74989"|"Generalized Convulsive Grand Mal Seizure"|"3"|"1"  
"27447"|"LaMICtal 25 MG Oral Tablet"|"75002"|"Partial Complex Psychomotor Seizure With Intractable Seizure"|"2"|"0.4"  
"27447"|"LaMICtal 25 MG Oral Tablet"|"252550"|"Generalized Convulsive Tonic Seizure With Intractable Seizure"|"2"|"0.666667"  
"27548"|"Prempro 0.625-2.5 MG Oral Tablet"|"60977"|"Menopause Has Occurred"|"2"|"1"  
"27548"|"Prempro 0.625-2.5 MG Oral Tablet"|"66073"|"Menopause"|"3"|"0.75"  
"27616"|"Terazosin HCl 1 MG Oral Capsule"|"289131"|"Benign Prostatic Hypertrophy"|"2"|"0.666667"  
"27617"|"Terazosin HCl 5 MG Oral Capsule"|"63467"|"Hypertension"|"3"|"0.142857"  
"27617"|"Terazosin HCl 5 MG Oral Capsule"|"63468"|"Essential Hypertension"|"4"|"0.4"  
"27617"|"Terazosin HCl 5 MG Oral Capsule"|"63470"|"Benign Essential Hypertension"|"2"|"0.4"  
"27650"|"Folic Acid Powder"|"296627"|"Colitis"|"2"|"1"  
"27672"|"Ultram 50 MG Oral Tablet"|"75125"|"Multiple Sclerosis"|"2"|"0.222222"  
"27673"|"Miconazole 3 200 MG Vaginal Suppository"|"77211"|"Vaginal Candidiasis"|"5"|"1"  
"27707"|"Poly-Vi-Sol/Iron Oral Solution"|"77962"|"Anemia"|"8"|"0.228571"  
"27748"|"Cozaar 50 MG Oral Tablet"|"63467"|"Hypertension"|"8"|"0.101266"  
"27748"|"Cozaar 50 MG Oral Tablet"|"63468"|"Essential Hypertension"|"4"|"0.148148"  
"27748"|"Cozaar 50 MG Oral Tablet"|"63470"|"Benign Essential Hypertension"|"5"|"0.185185"  
"27782"|"Loestrin 1/20 (21) 1-20 MG-MCG Oral Tablet"|"69549"|"Polycystic Ovarian Syndrome"|"2"|"0.666667"  
"27782"|"Loestrin 1/20 (21) 1-20 MG-MCG Oral Tablet"|"187792"|"Gynecologic Services Contraceptive Management"|"8"|"0.727273"  
"27782"|"Loestrin 1/20 (21) 1-20 MG-MCG Oral Tablet"|"187795"|"Gynecologic Services Prescription Of Contraceptive Agents"|"2"|"0.666667"  
"27782"|"Loestrin 1/20 (21) 1-20 MG-MCG Oral Tablet"|"250989"|"Oral Contraceptives"|"4"|"0.666667"  
"27783"|"Loestrin 1.5/30 (21) 1.5-30 MG-MCG Oral Tablet"|"187792"|"Gynecologic Services Contraceptive Management"|"3"|"1"  
"27828"|"Hydrocodone-Acetaminophen 7.5-500 MG Oral Tablet"|"60828"|"Headache"|"3"|"0.214286"  
"27828"|"Hydrocodone-Acetaminophen 7.5-500 MG Oral Tablet"|"62588"|"Chronic Ethmoidal Sinusitis"|"2"|"0.666667"  
"27828"|"Hydrocodone-Acetaminophen 7.5-500 MG Oral Tablet"|"70146"|"Osteoarthritis"|"2"|"0.333333"  
"27828"|"Hydrocodone-Acetaminophen 7.5-500 MG Oral Tablet"|"70455"|"Rheumatoid Arthritis"|"2"|"0.4"  
"27828"|"Hydrocodone-Acetaminophen 7.5-500 MG Oral Tablet"|"73666"|"Backache"|"3"|"0.176471"  
"27828"|"Hydrocodone-Acetaminophen 7.5-500 MG Oral Tablet"|"80847"|"Renal Cell Carcinoma"|"2"|"1"  
"27828"|"Hydrocodone-Acetaminophen 7.5-500 MG Oral Tablet"|"90952"|"Joint Pain, Localized In The Left Shoulder"|"2"|"0.5"  
"27828"|"Hydrocodone-Acetaminophen 7.5-500 MG Oral Tablet"|"91089"|"Lower Back Pain"|"7"|"0.333333"  
"27828"|"Hydrocodone-Acetaminophen 7.5-500 MG Oral Tablet"|"173442"|"Lumbar Radiculopathy"|"2"|"0.5"  
"27828"|"Hydrocodone-Acetaminophen 7.5-500 MG Oral Tablet"|"251261"|"Pelvic Pain"|"2"|"1"  
"27828"|"Hydrocodone-Acetaminophen 7.5-500 MG Oral Tablet"|"251467"|"Limb Pain"|"3"|"0.375"  
"27828"|"Hydrocodone-Acetaminophen 7.5-500 MG Oral Tablet"|"288921"|"Chronic Pain"|"2"|"0.25"  
"27829"|"Hydrocodone-Acetaminophen 7.5-750 MG Oral Tablet"|"70146"|"Osteoarthritis"|"3"|"0.214286"  
"27829"|"Hydrocodone-Acetaminophen 7.5-750 MG Oral Tablet"|"70455"|"Rheumatoid Arthritis"|"8"|"0.727273"  
"27829"|"Hydrocodone-Acetaminophen 7.5-750 MG Oral Tablet"|"74529"|"Headache Syndromes"|"2"|"0.666667"  
"27829"|"Hydrocodone-Acetaminophen 7.5-750 MG Oral Tablet"|"75579"|"Spondylosis Without Myelopathy"|"2"|"0.666667"  
"27829"|"Hydrocodone-Acetaminophen 7.5-750 MG Oral Tablet"|"75587"|"Lumbar Canal Stenosis"|"2"|"0.5"  
"27829"|"Hydrocodone-Acetaminophen 7.5-750 MG Oral Tablet"|"81092"|"Non-Hodgkin's Lymphoma"|"2"|"1"  
"27829"|"Hydrocodone-Acetaminophen 7.5-750 MG Oral Tablet"|"85614"|"Joint Pain, Localized In The Hip"|"3"|"0.333333"  
"27829"|"Hydrocodone-Acetaminophen 7.5-750 MG Oral Tablet"|"85623"|"Joint Pain, Localized In The Knee"|"5"|"0.384615"

"27829""Hydrocodone-Acetaminophen 7.5-750 MG Oral Tablet""85644""Foot Pain (Soft Tissue)""2""0.666667"  
"27829""Hydrocodone-Acetaminophen 7.5-750 MG Oral Tablet""85701""Joint Pain, Localized In The  
Shoulder""2""0.333333"  
"27829""Hydrocodone-Acetaminophen 7.5-750 MG Oral Tablet""90952""Joint Pain, Localized In The Left  
Shoulder""2""0.666667"  
"27829""Hydrocodone-Acetaminophen 7.5-750 MG Oral Tablet""91089""Lower Back Pain""10""0.37037"  
"27829""Hydrocodone-Acetaminophen 7.5-750 MG Oral Tablet""288977""Fibromyalgia""2""0.25"  
"27830""Hydrocodone-Acetaminophen 5-500 MG Oral Tablet""31947""Lumbago""6""0.142857"  
"27830""Hydrocodone-Acetaminophen 5-500 MG Oral Tablet""34444""Mucosal Cyst""2""1"  
"27830""Hydrocodone-Acetaminophen 5-500 MG Oral Tablet""60828""Headache""11""0.101852"  
"27830""Hydrocodone-Acetaminophen 5-500 MG Oral Tablet""60844""Tooth Pain""6""0.4"  
"27830""Hydrocodone-Acetaminophen 5-500 MG Oral Tablet""60899""Abdominal Pain""21""0.228261"  
"27830""Hydrocodone-Acetaminophen 5-500 MG Oral Tablet""62585""Chronic Sinusitis""5""0.147059"  
"27830""Hydrocodone-Acetaminophen 5-500 MG Oral Tablet""62586""Chronic Maxillary  
Sinusitis""44""0.357724"  
"27830""Hydrocodone-Acetaminophen 5-500 MG Oral Tablet""62587""Chronic Frontal Sinusitis""21""0.238636"  
"27830""Hydrocodone-Acetaminophen 5-500 MG Oral Tablet""62588""Chronic Ethmoidal  
Sinusitis""61""0.521368"  
"27830""Hydrocodone-Acetaminophen 5-500 MG Oral Tablet""62589""Chronic Sphenoidal Sinusitis""5""0.15625"  
"27830""Hydrocodone-Acetaminophen 5-500 MG Oral Tablet""62590""Chronic Pansinusitis""5""0.555556"  
"27830""Hydrocodone-Acetaminophen 5-500 MG Oral Tablet""62591""Nasal Polyps""5""0.119048"  
"27830""Hydrocodone-Acetaminophen 5-500 MG Oral Tablet""62592""Inverted Nasal Papilloma""5""0.5"  
"27830""Hydrocodone-Acetaminophen 5-500 MG Oral Tablet""62614""Deviated Nasal Septum  
(Acquired)""15""0.192308"  
"27830""Hydrocodone-Acetaminophen 5-500 MG Oral Tablet""62641""Parotitis""2""0.5"  
"27830""Hydrocodone-Acetaminophen 5-500 MG Oral Tablet""62753""Adenoid Hypertrophy""2""0.4"  
"27830""Hydrocodone-Acetaminophen 5-500 MG Oral Tablet""62760""Acute Pharyngitis""3""0.111111"  
"27830""Hydrocodone-Acetaminophen 5-500 MG Oral Tablet""65508""Post Abdominal Surgery""2""1"  
"27830""Hydrocodone-Acetaminophen 5-500 MG Oral Tablet""65662""Nephrolithiasis""4""0.16"  
"27830""Hydrocodone-Acetaminophen 5-500 MG Oral Tablet""66022""Ovarian Cyst""4""0.266667"  
"27830""Hydrocodone-Acetaminophen 5-500 MG Oral Tablet""66133""Dysmenorrhea""6""0.4"  
"27830""Hydrocodone-Acetaminophen 5-500 MG Oral Tablet""66274""Female Infertility""3""0.428571"  
"27830""Hydrocodone-Acetaminophen 5-500 MG Oral Tablet""66368""Cesarean Delivery - Delivered""6""0.75"  
"27830""Hydrocodone-Acetaminophen 5-500 MG Oral Tablet""69424""Diabetic Peripheral  
Neuropathy""4""0.133333"  
"27830""Hydrocodone-Acetaminophen 5-500 MG Oral Tablet""69663""Decubitus Ulcer""2""0.285714"  
"27830""Hydrocodone-Acetaminophen 5-500 MG Oral Tablet""69968""Carbuncle""3""0.333333"  
"27830""Hydrocodone-Acetaminophen 5-500 MG Oral Tablet""70016""Cellulitis Of The Leg""4""0.571429"  
"27830""Hydrocodone-Acetaminophen 5-500 MG Oral Tablet""70080""Skin Abscess""2""0.222222"  
"27830""Hydrocodone-Acetaminophen 5-500 MG Oral Tablet""70146""Osteoarthritis""14""0.177215"  
"27830""Hydrocodone-Acetaminophen 5-500 MG Oral Tablet""70196""Generalized Osteoarthritis""2""0.222222"  
"27830""Hydrocodone-Acetaminophen 5-500 MG Oral Tablet""70219""Osteoarthritis Of The Knee""10""0.37037"  
"27830""Hydrocodone-Acetaminophen 5-500 MG Oral Tablet""70221""Osteoarthritis Of Multiple Sites""4""0.5"  
"27830""Hydrocodone-Acetaminophen 5-500 MG Oral Tablet""70293""Arthropathy""2""1"  
"27830""Hydrocodone-Acetaminophen 5-500 MG Oral Tablet""70386""Acute Gout""3""0.272727"  
"27830""Hydrocodone-Acetaminophen 5-500 MG Oral Tablet""70455""Rheumatoid Arthritis""24""0.347826"  
"27830""Hydrocodone-Acetaminophen 5-500 MG Oral Tablet""70472""Systemic Lupus  
Erythematosus""7""0.184211"  
"27830""Hydrocodone-Acetaminophen 5-500 MG Oral Tablet""70475""Scleroderma""5""0.25"  
"27830""Hydrocodone-Acetaminophen 5-500 MG Oral Tablet""70638""Temporal Arteritis""2""0.666667"  
"27830""Hydrocodone-Acetaminophen 5-500 MG Oral Tablet""70703""Asymmetrical Polyarticular  
Inflammation""2""1"  
"27830""Hydrocodone-Acetaminophen 5-500 MG Oral Tablet""70706""Ankylosing Spondylitis""5""0.833333"  
"27830""Hydrocodone-Acetaminophen 5-500 MG Oral Tablet""71075""Fracture Of Facial Bones""3""0.75"

"27830""Hydrocodone-Acetaminophen 5-500 MG Oral Tablet""71076""Closed Fracture Of Facial Bones""2""1"  
"27830""Hydrocodone-Acetaminophen 5-500 MG Oral Tablet""71094""Closed Fracture Of The Lower Jaw -  
Multiple Sites""2""0.5"  
"27830""Hydrocodone-Acetaminophen 5-500 MG Oral Tablet""72681""Closed Bimalleolar Fracture""3""1"  
"27830""Hydrocodone-Acetaminophen 5-500 MG Oral Tablet""73421""Elbow Sprain""2""0.666667"  
"27830""Hydrocodone-Acetaminophen 5-500 MG Oral Tablet""73431""Wrist Sprain""3""0.75"  
"27830""Hydrocodone-Acetaminophen 5-500 MG Oral Tablet""73454""Lumbar Sprain""2""1"  
"27830""Hydrocodone-Acetaminophen 5-500 MG Oral Tablet""73464""Lower Back Sprain""7""0.466667"  
"27830""Hydrocodone-Acetaminophen 5-500 MG Oral Tablet""73666""Backache""25""0.268817"  
"27830""Hydrocodone-Acetaminophen 5-500 MG Oral Tablet""73696""Cervical Spondylosis With  
Myelopathy""2""1"  
"27830""Hydrocodone-Acetaminophen 5-500 MG Oral Tablet""73993""Acquired Deformity Of Nose""2""0.5"  
"27830""Hydrocodone-Acetaminophen 5-500 MG Oral Tablet""74106""Chronic Osteomyelitis""2""0.666667"  
"27830""Hydrocodone-Acetaminophen 5-500 MG Oral Tablet""74279""Hydrarthrosis Of The Knee / Patella / Tibia /  
Fibula""2""0.666667"  
"27830""Hydrocodone-Acetaminophen 5-500 MG Oral Tablet""74534""Classic Migraine (With  
Aura)""4""0.173913"  
"27830""Hydrocodone-Acetaminophen 5-500 MG Oral Tablet""74585""Cerebrospinal Fluid  
Rhinorrhea""3""0.428571"  
"27830""Hydrocodone-Acetaminophen 5-500 MG Oral Tablet""74963""Hereditary Hemorrhagic Telangiectasia  
(Osler-Rendu-Weber)""2""1"  
"27830""Hydrocodone-Acetaminophen 5-500 MG Oral Tablet""75002""Partial Complex Psychomotor Seizure With  
Intractable Seizure""2""0.285714"  
"27830""Hydrocodone-Acetaminophen 5-500 MG Oral Tablet""75487""Atypical Face Pain""2""0.222222"  
"27830""Hydrocodone-Acetaminophen 5-500 MG Oral Tablet""75717""Cervicalgia""5""0.108696"  
"27830""Hydrocodone-Acetaminophen 5-500 MG Oral Tablet""75728""Sciatica""6""0.285714"  
"27830""Hydrocodone-Acetaminophen 5-500 MG Oral Tablet""75811""Muscle Spasm""6""0.15"  
"27830""Hydrocodone-Acetaminophen 5-500 MG Oral Tablet""75812""Myalgia And Myositis""5""0.172414"  
"27830""Hydrocodone-Acetaminophen 5-500 MG Oral Tablet""76610""Chronic Pain Syndrome""4""0.222222"  
"27830""Hydrocodone-Acetaminophen 5-500 MG Oral Tablet""76794""Herpes Zoster (Shingles)""11""0.34375"  
"27830""Hydrocodone-Acetaminophen 5-500 MG Oral Tablet""76847""AIDS Polyneuropathy""2""0.666667"  
"27830""Hydrocodone-Acetaminophen 5-500 MG Oral Tablet""78035""Sickle Cell Hb-SS Disease""2""0.4"  
"27830""Hydrocodone-Acetaminophen 5-500 MG Oral Tablet""78371""Benign Nasal Cavity Neoplasm""2""0.5"  
"27830""Hydrocodone-Acetaminophen 5-500 MG Oral Tablet""78405""Malignant Neoplasm Of The Maxillary  
Sinus""2""1"  
"27830""Hydrocodone-Acetaminophen 5-500 MG Oral Tablet""80664""Leiomyoma Of The Uterus""5""0.217391"  
"27830""Hydrocodone-Acetaminophen 5-500 MG Oral Tablet""80847""Renal Cell Carcinoma""4""0.307692"  
"27830""Hydrocodone-Acetaminophen 5-500 MG Oral Tablet""81584""Burns""3""0.6"  
"27830""Hydrocodone-Acetaminophen 5-500 MG Oral Tablet""81810""Full Thickness (Third Degree) Burns Of  
Multiple Sites Of Wrists And Hands""2""1"  
"27830""Hydrocodone-Acetaminophen 5-500 MG Oral Tablet""82470""Traumatic Amputation Of  
Finger(S)""4""0.8"  
"27830""Hydrocodone-Acetaminophen 5-500 MG Oral Tablet""82650""Motor Vehicle Collision With Another  
Motor Vehicle On A Road""2""1"  
"27830""Hydrocodone-Acetaminophen 5-500 MG Oral Tablet""82948""Accident Caused By Explosion - Explosive  
Material""2""1"  
"27830""Hydrocodone-Acetaminophen 5-500 MG Oral Tablet""83233""Shoulder Injury""2""0.666667"  
"27830""Hydrocodone-Acetaminophen 5-500 MG Oral Tablet""83245""Ankle Injury""4""0.8"  
"27830""Hydrocodone-Acetaminophen 5-500 MG Oral Tablet""85604""Generalized Pain""2""0.666667"  
"27830""Hydrocodone-Acetaminophen 5-500 MG Oral Tablet""85614""Joint Pain, Localized In The  
Hip""13""0.270833"  
"27830""Hydrocodone-Acetaminophen 5-500 MG Oral Tablet""85623""Joint Pain, Localized In The  
Knee""37""0.33945"  
"27830""Hydrocodone-Acetaminophen 5-500 MG Oral Tablet""85633""Pain In The Leg (Below The

Knee)"|6|0.272727"  
"27830|Hydrocodone-Acetaminophen 5-500 MG Oral Tablet|85638|Ankle Joint Pain|9|0.236842"  
"27830|Hydrocodone-Acetaminophen 5-500 MG Oral Tablet|85644|Foot Pain (Soft Tissue)|4|0.129032"  
"27830|Hydrocodone-Acetaminophen 5-500 MG Oral Tablet|85649|Joint Pain In The Toes|2|0.222222"  
"27830|Hydrocodone-Acetaminophen 5-500 MG Oral Tablet|85658|Diffuse Joint Pains  
(Arthralgias)|4|0.363636"  
"27830|Hydrocodone-Acetaminophen 5-500 MG Oral Tablet|85691|Neck Pain|9|0.375"  
"27830|Hydrocodone-Acetaminophen 5-500 MG Oral Tablet|85701|Joint Pain, Localized In The  
Shoulder|8|0.190476"  
"27830|Hydrocodone-Acetaminophen 5-500 MG Oral Tablet|85707|Back Pain|2|0.285714"  
"27830|Hydrocodone-Acetaminophen 5-500 MG Oral Tablet|87740|Abdominal Pain In The Left Lower Belly  
(LLQ)|2|0.25"  
"27830|Hydrocodone-Acetaminophen 5-500 MG Oral Tablet|90945|Joint Pain, Localized In The Right  
Shoulder|5|0.454545"  
"27830|Hydrocodone-Acetaminophen 5-500 MG Oral Tablet|90952|Joint Pain, Localized In The Left  
Shoulder|4|0.307692"  
"27830|Hydrocodone-Acetaminophen 5-500 MG Oral Tablet|91079|Midback Pain|5|0.454545"  
"27830|Hydrocodone-Acetaminophen 5-500 MG Oral Tablet|91089|Lower Back Pain|74|0.506849"  
"27830|Hydrocodone-Acetaminophen 5-500 MG Oral Tablet|92456|Joint Pain, Localized In More Than One  
Joint|2|0.5"  
"27830|Hydrocodone-Acetaminophen 5-500 MG Oral Tablet|96964|Dehiscence Of Surgical  
Wound|2|0.285714"  
"27830|Hydrocodone-Acetaminophen 5-500 MG Oral Tablet|115862|Costovertebral Angle Tenderness|2|0.5"  
"27830|Hydrocodone-Acetaminophen 5-500 MG Oral Tablet|155099|(Lower) Leg Localized  
Swelling|3|0.125"  
"27830|Hydrocodone-Acetaminophen 5-500 MG Oral Tablet|166843|Nephrolithiasis Of The Right  
Kidney|3|0.75"  
"27830|Hydrocodone-Acetaminophen 5-500 MG Oral Tablet|169023|Fracture Of The Nasal Bones|4|0.5"  
"27830|Hydrocodone-Acetaminophen 5-500 MG Oral Tablet|172080|Neck Strain|2|0.4"  
"27830|Hydrocodone-Acetaminophen 5-500 MG Oral Tablet|172086|Lumbar Strain|2|0.333333"  
"27830|Hydrocodone-Acetaminophen 5-500 MG Oral Tablet|172705|Lumbar Spondylosis (L3 -  
L4)|2|0.666667"  
"27830|Hydrocodone-Acetaminophen 5-500 MG Oral Tablet|173419|Cervical Radiculopathy|3|0.2"  
"27830|Hydrocodone-Acetaminophen 5-500 MG Oral Tablet|173442|Lumbar Radiculopathy|7|0.333333"  
"27830|Hydrocodone-Acetaminophen 5-500 MG Oral Tablet|201752|Squamous Cell Carcinoma|2|0.5"  
"27830|Hydrocodone-Acetaminophen 5-500 MG Oral Tablet|250903|Varicose Veins With Pain|2|0.333333"  
"27830|Hydrocodone-Acetaminophen 5-500 MG Oral Tablet|251261|Pelvic Pain|8|0.533333"  
"27830|Hydrocodone-Acetaminophen 5-500 MG Oral Tablet|251467|Limb Pain|18|0.272727"  
"27830|Hydrocodone-Acetaminophen 5-500 MG Oral Tablet|252496|Female Pelvic Pain|5|0.263158"  
"27830|Hydrocodone-Acetaminophen 5-500 MG Oral Tablet|257996|Arthritis|14|0.0773481"  
"27830|Hydrocodone-Acetaminophen 5-500 MG Oral Tablet|259138|Rib Fracture|2|1"  
"27830|Hydrocodone-Acetaminophen 5-500 MG Oral Tablet|264622|Neck Cervical Mass Anterior  
Submandibular (\_\_\_cm)|2|0.5"  
"27830|Hydrocodone-Acetaminophen 5-500 MG Oral Tablet|264652|Neck Cervical Mass Left (\_\_\_cm)|2|1"  
"27830|Hydrocodone-Acetaminophen 5-500 MG Oral Tablet|278685|Arthralgias In Multiple  
Sites|3|0.176471"  
"27830|Hydrocodone-Acetaminophen 5-500 MG Oral Tablet|278781|Lung Cancer|3|0.157895"  
"27830|Hydrocodone-Acetaminophen 5-500 MG Oral Tablet|282272|Anterior Wall Chest Pain With  
Respiration|2|0.25"  
"27830|Hydrocodone-Acetaminophen 5-500 MG Oral Tablet|282676|Lymphadenopathy|4|0.285714"  
"27830|Hydrocodone-Acetaminophen 5-500 MG Oral Tablet|288895|Chronic Pain Due To Trauma|3|0.5"  
"27830|Hydrocodone-Acetaminophen 5-500 MG Oral Tablet|288921|Chronic Pain|17|0.404762"  
"27830|Hydrocodone-Acetaminophen 5-500 MG Oral Tablet|288933|Peripheral Neuropathy|6|0.111111"  
"27830|Hydrocodone-Acetaminophen 5-500 MG Oral Tablet|292512|Piriformis Syndrome|2|0.4"

"27830"|"Hydrocodone-Acetaminophen 5-500 MG Oral Tablet"|"296997"|"Peripheral Arterial Disease"|"2"|"0.666667"  
"27876"|"Prevacid 30 MG Oral Capsule Delayed Release"|"64680"|"Chronic Reflux Esophagitis"|"6"|"0.461538"  
"27876"|"Prevacid 30 MG Oral Capsule Delayed Release"|"64688"|"Esophageal Reflux"|"15"|"0.214286"  
"27951"|"Zithromax 1 GM Oral Packet"|"65847"|"Urethritis"|"2"|"0.5"  
"27951"|"Zithromax 1 GM Oral Packet"|"65848"|"Chlamydia Trachomatis Urethritis"|"5"|"0.833333"  
"27951"|"Zithromax 1 GM Oral Packet"|"76934"|"Chlamydial Infections"|"3"|"0.5"  
"27951"|"Zithromax 1 GM Oral Packet"|"77894"|"Venereal Disease Due To Chlamydia Trachomatis"|"2"|"0.666667"  
"27972"|"Diclofenac Sodium 50 MG Oral Tablet Delayed Release"|"91089"|"Lower Back Pain"|"2"|"0.666667"  
"28077"|"Valtrex 500 MG Oral Tablet"|"66540"|"Pregnancy Complicated By Herpes Simplex"|"2"|"1"  
"28077"|"Valtrex 500 MG Oral Tablet"|"76781"|"Herpes Simplex"|"9"|"0.375"  
"28077"|"Valtrex 500 MG Oral Tablet"|"76782"|"Herpes Simplex Type I"|"2"|"0.666667"  
"28077"|"Valtrex 500 MG Oral Tablet"|"76783"|"Herpes Simplex Type II"|"8"|"0.296296"  
"28117"|"Citric Acid-Sodium Citrate 334-500 MG/5ML Oral Solution"|"65655"|"Renal Tubular Acidosis"|"4"|"0.5"  
"28117"|"Citric Acid-Sodium Citrate 334-500 MG/5ML Oral Solution"|"69535"|"Metabolic Acidosis"|"5"|"0.5"  
"28117"|"Citric Acid-Sodium Citrate 334-500 MG/5ML Oral Solution"|"274606"|"Chronic Kidney Disease, Stage 3"|"6"|"0.5"  
"28117"|"Citric Acid-Sodium Citrate 334-500 MG/5ML Oral Solution"|"274669"|"Chronic Renal Insufficiency"|"3"|"0.75"  
"28117"|"Citric Acid-Sodium Citrate 334-500 MG/5ML Oral Solution"|"274672"|"Chronic Kidney Disease, Stage 4"|"5"|"0.5"  
"28136"|"Androderm 2.5 MG/24HR Transdermal Patch 24 Hour"|"69588"|"Hypogonadism"|"6"|"1"  
"28172"|"Guaifenesin-DM 100-10 MG/5ML Oral Syrup"|"60869"|"Cough"|"2"|"0.666667"  
"28172"|"Guaifenesin-DM 100-10 MG/5ML Oral Syrup"|"77891"|"Acute Upper Respiratory Infection"|"4"|"0.444444"  
"28183"|"PredniSONE (Pak) 10 MG Oral Tablet"|"73666"|"Backache"|"2"|"0.666667"  
"28183"|"PredniSONE (Pak) 10 MG Oral Tablet"|"75733"|"Myasthenia Gravis"|"2"|"1"  
"28186"|"Nutropin 10 MG Subcutaneous Solution Reconstituted"|"292025"|"Short Stature"|"2"|"1"  
"28194"|"Epivir 10 MG/ML Oral Solution"|"76835"|"HIV Infection"|"11"|"0.916667"  
"28270"|"Acetaminophen-Codeine #4 300-60 MG Oral Tablet"|"91089"|"Lower Back Pain"|"2"|"0.666667"  
"28272"|"Accu-Chek Instant Glucose Test STRP"|"69380"|"Diabetes Mellitus"|"2"|"1"  
"28337"|"DDAVP 0.2 MG Oral Tablet"|"69214"|"Hypopituitarism"|"2"|"0.666667"  
"28338"|"Rilutek 50 MG Oral Tablet"|"75688"|"Motor Neuron Disease"|"3"|"0.6"  
"28340"|"Lupron Depot 22.5 MG Intramuscular Kit"|"80830"|"Malignant Neoplasm Of The Prostate Gland"|"2"|"0.285714"  
"28340"|"Lupron Depot 22.5 MG Intramuscular Kit"|"80831"|"Adenocarcinoma Of The Prostate Gland"|"3"|"0.428571"  
"28340"|"Lupron Depot 22.5 MG Intramuscular Kit"|"278808"|"Breast Cancer"|"2"|"0.666667"  
"28340"|"Lupron Depot 22.5 MG Intramuscular Kit"|"278812"|"Prostate Cancer"|"22"|"0.628571"  
"28354"|"Arimidex 1 MG Oral Tablet"|"278808"|"Breast Cancer"|"5"|"0.217391"  
"28360"|"Cytra-2 500-334 MG/5ML Oral Solution"|"65655"|"Renal Tubular Acidosis"|"2"|"1"  
"28360"|"Cytra-2 500-334 MG/5ML Oral Solution"|"274606"|"Chronic Kidney Disease, Stage 3"|"3"|"1"  
"28360"|"Cytra-2 500-334 MG/5ML Oral Solution"|"274672"|"Chronic Kidney Disease, Stage 4"|"3"|"0.75"  
"28416"|"Norvir 100 MG Oral Capsule"|"76835"|"HIV Infection"|"58"|"0.716049"  
"28416"|"Norvir 100 MG Oral Capsule"|"76842"|"Acquired Immunodeficiency Syndrome (AIDS)"|"23"|"0.534884"  
"28432"|"Paxil 10 MG Oral Tablet"|"76351"|"Depression"|"2"|"0.222222"  
"28508"|"Amitriptyline HCl Powder"|"60899"|"Abdominal Pain"|"2"|"0.5"  
"28508"|"Amitriptyline HCl Powder"|"64688"|"Esophageal Reflux"|"5"|"0.294118"  
"28508"|"Amitriptyline HCl Powder"|"64748"|"Gastroparesis"|"3"|"0.75"  
"28508"|"Amitriptyline HCl Powder"|"87741"|"Abdominal Pain Around The Belly Button (Periumbilical)"|"2"|"1"  
"28508"|"Amitriptyline HCl Powder"|"87743"|"Diffuse Abdominal Pain"|"7"|"0.777778"  
"28508"|"Amitriptyline HCl Powder"|"257912"|"Disorder Of Mitochondrial Metabolism"|"2"|"0.2"  
"28508"|"Amitriptyline HCl Powder"|"282695"|"Cyclic Vomiting Syndrome"|"2"|"1"  
"28508"|"Amitriptyline HCl Powder"|"292064"|"Dysphagia"|"2"|"0.222222"  
"28514"|"Bethanechol Chloride Powder"|"64688"|"Esophageal Reflux"|"8"|"0.8"  
"28517"|"Baclofen Powder"|"201177"|"Quadriplegic Cerebral Palsy With Spasticity"|"2"|"0.4"  
"28547"|"Furosemide Powder"|"67885"|"Bronchopulmonary Dysplasia Of Fetus Or Newborn"|"2"|"1"

"28555"|"Avonex 30 MCG Intramuscular Kit"|"75125"|"Multiple Sclerosis"|"3"|"0.3"  
"28632"|"TEGretol XR 100 MG Oral Tablet Extended Release 12 Hour"|"74988"|"Seizure Disorder"|"4"|"0.571429"  
"28632"|"TEGretol XR 100 MG Oral Tablet Extended Release 12 Hour"|"75001"|"Partial Complex Psychomotor  
Seizure"|"3"|"1"  
"28632"|"TEGretol XR 100 MG Oral Tablet Extended Release 12 Hour"|"252566"|"Partial Complex  
Seizure"|"2"|"0.666667"  
"28635"|"Nasacort AQ 55 MCG/ACT Nasal Aerosol Solution"|"60869"|"Cough"|"5"|"0.151515"  
"28635"|"Nasacort AQ 55 MCG/ACT Nasal Aerosol Solution"|"62578"|"Acute Sinusitis"|"5"|"0.238095"  
"28635"|"Nasacort AQ 55 MCG/ACT Nasal Aerosol Solution"|"62580"|"Acute Maxillary Sinusitis"|"2"|"0.222222"  
"28635"|"Nasacort AQ 55 MCG/ACT Nasal Aerosol Solution"|"62586"|"Chronic Maxillary Sinusitis"|"3"|"0.166667"  
"28635"|"Nasacort AQ 55 MCG/ACT Nasal Aerosol Solution"|"62587"|"Chronic Frontal Sinusitis"|"2"|"0.25"  
"28635"|"Nasacort AQ 55 MCG/ACT Nasal Aerosol Solution"|"62588"|"Chronic Ethmoidal Sinusitis"|"6"|"0.4"  
"28635"|"Nasacort AQ 55 MCG/ACT Nasal Aerosol Solution"|"62598"|"Allergic Rhinitis"|"79"|"0.617188"  
"28635"|"Nasacort AQ 55 MCG/ACT Nasal Aerosol Solution"|"62599"|"Allergic Rhinitis Due To  
Pollen"|"5"|"0.833333"  
"28635"|"Nasacort AQ 55 MCG/ACT Nasal Aerosol Solution"|"64181"|"Asthma"|"14"|"0.222222"  
"28635"|"Nasacort AQ 55 MCG/ACT Nasal Aerosol Solution"|"77891"|"Acute Upper Respiratory  
Infection"|"6"|"0.146341"  
"28675"|"Xalatan 0.005 % Ophthalmic Solution"|"62066"|"Glaucoma"|"5"|"0.131579"  
"28681"|"Remeron 15 MG Oral Tablet"|"76351"|"Depression"|"13"|"0.684211"  
"28708"|"Viramune 200 MG Oral Tablet"|"76835"|"HIV Infection"|"15"|"0.789474"  
"28708"|"Viramune 200 MG Oral Tablet"|"76842"|"Acquired Immunodeficiency Syndrome (AIDS)"|"3"|"0.75"  
"28784"|"Nystop 100000 UNIT/GM External Powder"|"189833"|"Tracheostomy Care Requirement"|"5"|"0.833333"  
"28792"|"Claritin-D 12 Hour 5-120 MG Oral Tablet Extended Release 12 Hour"|"62598"|"Allergic  
Rhinitis"|"11"|"0.55"  
"28792"|"Claritin-D 12 Hour 5-120 MG Oral Tablet Extended Release 12 Hour"|"64118"|"Acute Bronchitis"|"3"|"0.6"  
"28792"|"Claritin-D 12 Hour 5-120 MG Oral Tablet Extended Release 12 Hour"|"77891"|"Acute Upper Respiratory  
Infection"|"4"|"0.444444"  
"28792"|"Claritin-D 12 Hour 5-120 MG Oral Tablet Extended Release 12 Hour"|"289113"|"Acute Rhinitis"|"2"|"1"  
"28859"|"Proventil HFA 108 (90 Base) MCG/ACT Inhalation Aerosol Solution"|"60863"|"Difficulty Breathing  
(Dyspnea)"|"5"|"0.166667"  
"28859"|"Proventil HFA 108 (90 Base) MCG/ACT Inhalation Aerosol Solution"|"60869"|"Cough"|"22"|"0.305556"  
"28859"|"Proventil HFA 108 (90 Base) MCG/ACT Inhalation Aerosol Solution"|"60874"|"Wheezing"|"11"|"0.34375"  
"28859"|"Proventil HFA 108 (90 Base) MCG/ACT Inhalation Aerosol Solution"|"63484"|"Pulmonary  
Hypertension"|"2"|"0.222222"  
"28859"|"Proventil HFA 108 (90 Base) MCG/ACT Inhalation Aerosol Solution"|"64118"|"Acute  
Bronchitis"|"23"|"0.396552"  
"28859"|"Proventil HFA 108 (90 Base) MCG/ACT Inhalation Aerosol Solution"|"64180"|"Reactive Airway  
Disease"|"17"|"0.414634"  
"28859"|"Proventil HFA 108 (90 Base) MCG/ACT Inhalation Aerosol Solution"|"64181"|"Asthma"|"128"|"0.522449"  
"28859"|"Proventil HFA 108 (90 Base) MCG/ACT Inhalation Aerosol Solution"|"64186"|"Extrinsic  
Asthma"|"5"|"0.833333"  
"28859"|"Proventil HFA 108 (90 Base) MCG/ACT Inhalation Aerosol Solution"|"64190"|"Exercise-induced  
Asthma"|"6"|"0.6"  
"28859"|"Proventil HFA 108 (90 Base) MCG/ACT Inhalation Aerosol  
Solution"|"64202"|"Bronchiolitis"|"10"|"0.588235"  
"28859"|"Proventil HFA 108 (90 Base) MCG/ACT Inhalation Aerosol Solution"|"64205"|"Chronic Obstructive  
Pulmonary Disease"|"12"|"0.387097"  
"28859"|"Proventil HFA 108 (90 Base) MCG/ACT Inhalation Aerosol Solution"|"64206"|"Chronic  
Bronchitis"|"2"|"0.285714"  
"28859"|"Proventil HFA 108 (90 Base) MCG/ACT Inhalation Aerosol Solution"|"64212"|"Emphysema"|"3"|"0.333333"  
"28859"|"Proventil HFA 108 (90 Base) MCG/ACT Inhalation Aerosol  
Solution"|"64223"|"Bronchiectasis"|"2"|"0.333333"  
"28859"|"Proventil HFA 108 (90 Base) MCG/ACT Inhalation Aerosol Solution"|"77891"|"Acute Upper Respiratory

Infection"|"7"|"0.1"  
"28859"|"Proventil HFA 108 (90 Base) MCG/ACT Inhalation Aerosol Solution"|"166748"|"Asthma With Acute Exacerbation"|"3"|"0.2"  
"28859"|"Proventil HFA 108 (90 Base) MCG/ACT Inhalation Aerosol Solution"|"247012"|"Shortness Of Breath"|"7"|"0.333333"  
"28859"|"Proventil HFA 108 (90 Base) MCG/ACT Inhalation Aerosol Solution"|"258832"|"Cough Variant Asthma"|"2"|"0.333333"  
"28859"|"Proventil HFA 108 (90 Base) MCG/ACT Inhalation Aerosol Solution"|"258835"|"Bronchitis"|"3"|"0.157895"  
"28859"|"Proventil HFA 108 (90 Base) MCG/ACT Inhalation Aerosol Solution"|"277885"|"Bronchospasm"|"6"|"0.666667"  
"28859"|"Proventil HFA 108 (90 Base) MCG/ACT Inhalation Aerosol Solution"|"277914"|"Acute Bronchitis With Bronchospasm"|"5"|"0.454545"  
"28859"|"Proventil HFA 108 (90 Base) MCG/ACT Inhalation Aerosol Solution"|"297031"|"Intermittent Asthma"|"5"|"0.625"  
"28890"|"Ammonium Lactate 12 % External Cream"|"69794"|"Keratosis Pilaris"|"5"|"0.714286"  
"28890"|"Ammonium Lactate 12 % External Cream"|"69964"|"Xerosis Cutis"|"3"|"1"  
"28924"|"Estring 2 MG Vaginal Ring"|"61011"|"Inadequacy Of Lubrication Of Vaginal Mucosa"|"2"|"1"  
"28924"|"Estring 2 MG Vaginal Ring"|"116888"|"Vaginal Mucosa Atrophy"|"2"|"1"  
"28999"|"Combivent 18-103 MCG/ACT Inhalation Aerosol"|"60863"|"Difficulty Breathing (Dyspnea)"|"4"|"0.25"  
"28999"|"Combivent 18-103 MCG/ACT Inhalation Aerosol"|"60869"|"Cough"|"6"|"0.15"  
"28999"|"Combivent 18-103 MCG/ACT Inhalation Aerosol"|"60874"|"Wheezing"|"2"|"0.285714"  
"28999"|"Combivent 18-103 MCG/ACT Inhalation Aerosol"|"64118"|"Acute Bronchitis"|"12"|"0.545455"  
"28999"|"Combivent 18-103 MCG/ACT Inhalation Aerosol"|"64180"|"Reactive Airway Disease"|"2"|"0.333333"  
"28999"|"Combivent 18-103 MCG/ACT Inhalation Aerosol"|"64181"|"Asthma"|"24"|"0.444444"  
"28999"|"Combivent 18-103 MCG/ACT Inhalation Aerosol"|"64205"|"Chronic Obstructive Pulmonary Disease"|"34"|"0.557377"  
"28999"|"Combivent 18-103 MCG/ACT Inhalation Aerosol"|"64206"|"Chronic Bronchitis"|"8"|"0.727273"  
"28999"|"Combivent 18-103 MCG/ACT Inhalation Aerosol"|"64212"|"Emphysema"|"6"|"0.6"  
"28999"|"Combivent 18-103 MCG/ACT Inhalation Aerosol"|"166748"|"Asthma With Acute Exacerbation"|"3"|"0.5"  
"28999"|"Combivent 18-103 MCG/ACT Inhalation Aerosol"|"247012"|"Shortness Of Breath"|"6"|"0.285714"  
"29025"|"Aricept 5 MG Oral Tablet"|"35314"|"Personality Change Due To Axis III Etiology"|"3"|"1"  
"29025"|"Aricept 5 MG Oral Tablet"|"61048"|"Memory Lapses Or Loss"|"23"|"0.575"  
"29025"|"Aricept 5 MG Oral Tablet"|"75020"|"Alzheimer's Disease"|"15"|"0.405405"  
"29025"|"Aricept 5 MG Oral Tablet"|"75021"|"Alzheimer's Disease Early Onset"|"2"|"0.666667"  
"29025"|"Aricept 5 MG Oral Tablet"|"75032"|"Vascular Dementia"|"2"|"0.2"  
"29025"|"Aricept 5 MG Oral Tablet"|"75920"|"Dementia Of Unknown (Axis III) Etiology"|"2"|"0.5"  
"29025"|"Aricept 5 MG Oral Tablet"|"163751"|"Cognitive Functions Current Level Impaired"|"2"|"0.4"  
"29025"|"Aricept 5 MG Oral Tablet"|"251600"|"Dementia"|"29"|"0.391892"  
"29025"|"Aricept 5 MG Oral Tablet"|"252575"|"Dementia With Lewy Bodies"|"3"|"0.75"  
"29026"|"Aricept 10 MG Oral Tablet"|"61048"|"Memory Lapses Or Loss"|"36"|"0.514286"  
"29026"|"Aricept 10 MG Oral Tablet"|"75020"|"Alzheimer's Disease"|"36"|"0.423529"  
"29026"|"Aricept 10 MG Oral Tablet"|"75021"|"Alzheimer's Disease Early Onset"|"3"|"0.75"  
"29026"|"Aricept 10 MG Oral Tablet"|"75032"|"Vascular Dementia"|"6"|"0.26087"  
"29026"|"Aricept 10 MG Oral Tablet"|"75082"|"Parkinson's Disease With Dementia"|"3"|"0.75"  
"29026"|"Aricept 10 MG Oral Tablet"|"75920"|"Dementia Of Unknown (Axis III) Etiology"|"2"|"0.5"  
"29026"|"Aricept 10 MG Oral Tablet"|"163751"|"Cognitive Functions Current Level Impaired"|"5"|"0.454545"  
"29026"|"Aricept 10 MG Oral Tablet"|"251600"|"Dementia"|"55"|"0.398551"  
"29026"|"Aricept 10 MG Oral Tablet"|"252573"|"Frontotemporal Dementia"|"6"|"0.666667"  
"29026"|"Aricept 10 MG Oral Tablet"|"252575"|"Dementia With Lewy Bodies"|"8"|"0.727273"  
"29057"|"Levaquin 500 MG Oral Tablet"|"60869"|"Cough"|"12"|"0.171429"  
"29057"|"Levaquin 500 MG Oral Tablet"|"60928"|"Pain During Urination (Dysuria)"|"2"|"0.2"  
"29057"|"Levaquin 500 MG Oral Tablet"|"62577"|"Sinusitis"|"2"|"0.2"  
"29057"|"Levaquin 500 MG Oral Tablet"|"62578"|"Acute Sinusitis"|"10"|"0.277778"  
"29057"|"Levaquin 500 MG Oral Tablet"|"62580"|"Acute Maxillary Sinusitis"|"4"|"0.363636"

"29057"|"Levaquin 500 MG Oral Tablet"|"62586"|"Chronic Maxillary Sinusitis"|"6"|"0.157895"  
"29057"|"Levaquin 500 MG Oral Tablet"|"62587"|"Chronic Frontal Sinusitis"|"10"|"0.30303"  
"29057"|"Levaquin 500 MG Oral Tablet"|"62588"|"Chronic Ethmoidal Sinusitis"|"23"|"0.489362"  
"29057"|"Levaquin 500 MG Oral Tablet"|"64118"|"Acute Bronchitis"|"17"|"0.377778"  
"29057"|"Levaquin 500 MG Oral Tablet"|"64126"|"Pneumonia"|"10"|"0.37037"  
"29057"|"Levaquin 500 MG Oral Tablet"|"64170"|"Bronchopneumonia"|"3"|"0.75"  
"29057"|"Levaquin 500 MG Oral Tablet"|"64205"|"Chronic Obstructive Pulmonary Disease"|"3"|"0.12"  
"29057"|"Levaquin 500 MG Oral Tablet"|"64223"|"Bronchiectasis"|"6"|"0.545455"  
"29057"|"Levaquin 500 MG Oral Tablet"|"65065"|"Diverticulitis Of Colon"|"2"|"0.285714"  
"29057"|"Levaquin 500 MG Oral Tablet"|"65622"|"Pyelonephritis"|"2"|"0.5"  
"29057"|"Levaquin 500 MG Oral Tablet"|"65762"|"Urinary Tract Infection"|"20"|"0.465116"  
"29057"|"Levaquin 500 MG Oral Tablet"|"65764"|"Urinary Tract Infection, Geriatric Presentation"|"2"|"0.666667"  
"29057"|"Levaquin 500 MG Oral Tablet"|"65831"|"Prostatitis"|"8"|"0.666667"  
"29057"|"Levaquin 500 MG Oral Tablet"|"65856"|"Urethral Stricture"|"2"|"0.5"  
"29057"|"Levaquin 500 MG Oral Tablet"|"70000"|"Facial Cellulitis"|"2"|"1"  
"29057"|"Levaquin 500 MG Oral Tablet"|"76976"|"Helicobacter Pylori (H. Pylori) Infection"|"2"|"0.666667"  
"29057"|"Levaquin 500 MG Oral Tablet"|"77890"|"Upper Respiratory Infection"|"4"|"0.181818"  
"29057"|"Levaquin 500 MG Oral Tablet"|"77891"|"Acute Upper Respiratory Infection"|"9"|"0.25"  
"29057"|"Levaquin 500 MG Oral Tablet"|"77894"|"Venereal Disease Due To Chlamydia Trachomatis"|"2"|"1"  
"29057"|"Levaquin 500 MG Oral Tablet"|"87587"|"Coughing Up Sputum Yellow"|"3"|"0.75"  
"29057"|"Levaquin 500 MG Oral Tablet"|"166743"|"Community-acquired Pneumonia"|"3"|"0.75"  
"29057"|"Levaquin 500 MG Oral Tablet"|"168530"|"Chronic Nondecubitus Ulcer Of The Ankle"|"2"|"0.666667"  
"29057"|"Levaquin 500 MG Oral Tablet"|"199805"|"Serology Prostate-specific Antigen (PSA)  
Elevated"|"13"|"0.481481"  
"29057"|"Levaquin 500 MG Oral Tablet"|"250613"|"Fever (On Exam)"|"3"|"0.5"  
"29057"|"Levaquin 500 MG Oral Tablet"|"277876"|"Lobar Pneumonia"|"2"|"0.666667"  
"29058"|"Topamax 25 MG Oral Tablet"|"61040"|"Convulsions"|"2"|"0.4"  
"29058"|"Topamax 25 MG Oral Tablet"|"74529"|"Headache Syndromes"|"2"|"0.285714"  
"29058"|"Topamax 25 MG Oral Tablet"|"74533"|"Migraine Headache"|"4"|"0.121212"  
"29058"|"Topamax 25 MG Oral Tablet"|"74988"|"Seizure Disorder"|"9"|"0.243243"  
"29058"|"Topamax 25 MG Oral Tablet"|"74992"|"Generalized Convulsive Myoclonic Seizure With Intractable  
Seizure"|"3"|"1"  
"29058"|"Topamax 25 MG Oral Tablet"|"75001"|"Partial Complex Psychomotor Seizure"|"2"|"0.4"  
"29058"|"Topamax 25 MG Oral Tablet"|"75002"|"Partial Complex Psychomotor Seizure With Intractable  
Seizure"|"5"|"0.555556"  
"29058"|"Topamax 25 MG Oral Tablet"|"252550"|"Generalized Convulsive Tonic Seizure With Intractable  
Seizure"|"2"|"1"  
"29058"|"Topamax 25 MG Oral Tablet"|"252570"|"Partial Complex Seizure With Secondary Generalization With  
Intractable Seizure"|"3"|"0.75"  
"29058"|"Topamax 25 MG Oral Tablet"|"297231"|"Epilepsy"|"5"|"0.5"  
"29059"|"Topamax 200 MG Oral Tablet"|"74988"|"Seizure Disorder"|"3"|"0.214286"  
"29059"|"Topamax 200 MG Oral Tablet"|"75002"|"Partial Complex Psychomotor Seizure With Intractable  
Seizure"|"7"|"0.7"  
"29059"|"Topamax 200 MG Oral Tablet"|"252566"|"Partial Complex Seizure"|"2"|"0.666667"  
"29060"|"L-Arginine Powder"|"257912"|"Disorder Of Mitochondrial Metabolism"|"2"|"0.5"  
"29067"|"Hydrochlorothiazide 12.5 MG Oral Capsule"|"63467"|"Hypertension"|"106"|"0.378571"  
"29067"|"Hydrochlorothiazide 12.5 MG Oral Capsule"|"63468"|"Essential Hypertension"|"65"|"0.457746"  
"29067"|"Hydrochlorothiazide 12.5 MG Oral Capsule"|"63470"|"Benign Essential Hypertension"|"75"|"0.535714"  
"29067"|"Hydrochlorothiazide 12.5 MG Oral Capsule"|"63471"|"Accelerated Essential Hypertension"|"2"|"0.666667"  
"29067"|"Hydrochlorothiazide 12.5 MG Oral Capsule"|"64099"|"Dependent Edema Due To Inactivity"|"2"|"0.666667"  
"29067"|"Hydrochlorothiazide 12.5 MG Oral Capsule"|"68087"|"Hyperkalemia"|"2"|"0.2"  
"29067"|"Hydrochlorothiazide 12.5 MG Oral Capsule"|"69401"|"Diabetes Mellitus Under Control"|"2"|"0.5"  
"29067"|"Hydrochlorothiazide 12.5 MG Oral Capsule"|"250579"|"Blood Pressure Isolated Elevated"|"13"|"0.309524"  
"29067"|"Hydrochlorothiazide 12.5 MG Oral Capsule"|"257959"|"Hypercalciuria"|"2"|"0.666667"

"29067"|"Hydrochlorothiazide 12.5 MG Oral Capsule"|"270715"|"ACP Staging Stage 2 Hypertension: Greater Than Or = 160/100"|"2"|"0.5"

"29067"|"Hydrochlorothiazide 12.5 MG Oral Capsule"|"282327"|"Prehypertension"|"2"|"0.5"

"29075"|"Astelin 137 MCG/SPRAY Nasal Solution"|"62598"|"Allergic Rhinitis"|"10"|"0.208333"

"29086"|"Azulfidine EN-tabs 500 MG Oral Tablet Delayed Release"|"70455"|"Rheumatoid Arthritis"|"6"|"0.857143"

"29086"|"Azulfidine EN-tabs 500 MG Oral Tablet Delayed Release"|"70706"|"Ankylosing Spondylitis"|"2"|"1"

"29086"|"Azulfidine EN-tabs 500 MG Oral Tablet Delayed Release"|"70722"|"Spondylitis"|"2"|"1"

"29151"|"Diovan 160 MG CAPS"|"63468"|"Essential Hypertension"|"2"|"0.285714"

"29156"|"Warfarin Sodium 3 MG Oral Tablet"|"62916"|"Atrial Fibrillation"|"17"|"0.586207"

"29265"|"Procrit 20000 UNIT/ML Injection Solution"|"77962"|"Anemia"|"5"|"0.357143"

"29265"|"Procrit 20000 UNIT/ML Injection Solution"|"274606"|"Chronic Kidney Disease, Stage 3"|"2"|"0.25"

"29265"|"Procrit 20000 UNIT/ML Injection Solution"|"278753"|"Anemia Of Chronic Kidney Disease"|"9"|"0.5625"

"29267"|"Norco 10-325 MG Oral Tablet"|"81584"|"Burns"|"7"|"0.7"

"29267"|"Norco 10-325 MG Oral Tablet"|"82311"|"Open Wound Of The Forearm With Tendon Involvement"|"2"|"0.666667"

"29267"|"Norco 10-325 MG Oral Tablet"|"82470"|"Traumatic Amputation Of Finger(S)"|"2"|"1"

"29278"|"Claritin Reditabs 10 MG Oral Tablet Dispersible"|"62598"|"Allergic Rhinitis"|"9"|"0.75"

"29344"|"Hydrocodone-Acetaminophen 10-500 MG Oral Tablet"|"64980"|"Crohn's Disease"|"2"|"1"

"29344"|"Hydrocodone-Acetaminophen 10-500 MG Oral Tablet"|"69660"|"Chronic Cutaneous Ulcer"|"2"|"1"

"29344"|"Hydrocodone-Acetaminophen 10-500 MG Oral Tablet"|"75590"|"Postlaminectomy Syndrome (Lumbar)"|"2"|"1"

"29344"|"Hydrocodone-Acetaminophen 10-500 MG Oral Tablet"|"75594"|"Spinal Stenosis"|"2"|"0.333333"

"29344"|"Hydrocodone-Acetaminophen 10-500 MG Oral Tablet"|"81224"|"Malignant Neoplasm Of The Head, Face, Or Neck"|"2"|"1"

"29344"|"Hydrocodone-Acetaminophen 10-500 MG Oral Tablet"|"85623"|"Joint Pain, Localized In The Knee"|"6"|"0.5"

"29344"|"Hydrocodone-Acetaminophen 10-500 MG Oral Tablet"|"91089"|"Lower Back Pain"|"3"|"0.230769"

"29344"|"Hydrocodone-Acetaminophen 10-500 MG Oral Tablet"|"257996"|"Arthritis"|"3"|"0.115385"

"29344"|"Hydrocodone-Acetaminophen 10-500 MG Oral Tablet"|"288921"|"Chronic Pain"|"6"|"0.5"

"29440"|"Viracept 250 MG Oral Tablet"|"76835"|"HIV Infection"|"2"|"1"

"29621"|"RA Antiseptic Mouth Rinse Mouth/Throat Liquid"|"106838"|"Odor Of Breath Fetor Oris"|"3"|"1"

"29727"|"Lupron Depot 11.25 MG Intramuscular Kit"|"66070"|"Menorrhagia"|"3"|"0.75"

"29727"|"Lupron Depot 11.25 MG Intramuscular Kit"|"69556"|"Precocious Puberty"|"3"|"1"

"29727"|"Lupron Depot 11.25 MG Intramuscular Kit"|"80664"|"Leiomyoma Of The Uterus"|"2"|"0.4"

"29729"|"Androderm 5 MG/24HR Transdermal Patch 24 Hour"|"69588"|"Hypogonadism"|"8"|"0.727273"

"29744"|"Hydrocodone-Acetaminophen 10-650 MG Oral Tablet"|"70455"|"Rheumatoid Arthritis"|"3"|"0.75"

"29744"|"Hydrocodone-Acetaminophen 10-650 MG Oral Tablet"|"74533"|"Migraine Headache"|"2"|"0.285714"

"29744"|"Hydrocodone-Acetaminophen 10-650 MG Oral Tablet"|"85701"|"Joint Pain, Localized In The Shoulder"|"2"|"0.4"

"29744"|"Hydrocodone-Acetaminophen 10-650 MG Oral Tablet"|"91089"|"Lower Back Pain"|"8"|"0.5"

"29744"|"Hydrocodone-Acetaminophen 10-650 MG Oral Tablet"|"173442"|"Lumbar Radiculopathy"|"2"|"0.4"

"29755"|"Lipitor 40 MG Oral Tablet"|"62975"|"Coronary Artery Disease"|"26"|"0.104418"

"29755"|"Lipitor 40 MG Oral Tablet"|"63148"|"2-vessel Coronary Artery Stenosis"|"3"|"0.2"

"29755"|"Lipitor 40 MG Oral Tablet"|"67969"|"Familial Combined Hyperlipidemia"|"7"|"0.7"

"29755"|"Lipitor 40 MG Oral Tablet"|"67970"|"Hyperlipidemia"|"261"|"0.540373"

"29755"|"Lipitor 40 MG Oral Tablet"|"67974"|"Frederickson Type IIB Hyperlipidemia"|"3"|"0.6"

"29755"|"Lipitor 40 MG Oral Tablet"|"68098"|"Lipoid Metabolism Disorder"|"6"|"0.4"

"29755"|"Lipitor 40 MG Oral Tablet"|"75354"|"Cerebral Artery Thrombosis - With Cerebral Infarction"|"5"|"0.227273"

"29755"|"Lipitor 40 MG Oral Tablet"|"257908"|"Essential Hypertriglyceridemia"|"2"|"0.25"

"29755"|"Lipitor 40 MG Oral Tablet"|"283291"|"Hypercholesterolemia"|"18"|"0.514286"

"29755"|"Lipitor 40 MG Oral Tablet"|"283292"|"Essential Hypercholesterolemia"|"17"|"0.395349"

"29755"|"Lipitor 40 MG Oral Tablet"|"291485"|"Dyslipidemia"|"29"|"0.467742"

"29836"|"Mirapex 0.125 MG Oral Tablet"|"75054"|"Restless Legs Syndrome"|"2"|"0.285714"

"29840"|"Pentoxifylline CR 400 MG Oral Tablet Extended Release"|"63722"|"Intermittent Claudication"|"2"|"0.25"

"29840""Pentoxifylline CR 400 MG Oral Tablet Extended Release""63738""Peripheral Vascular Disease""6""0.428571"

"29840""Pentoxifylline CR 400 MG Oral Tablet Extended Release""63758""Raynaud's Disease""3""0.272727"

"29840""Pentoxifylline CR 400 MG Oral Tablet Extended Release""69660""Chronic Cutaneous Ulcer""2""0.4"

"29840""Pentoxifylline CR 400 MG Oral Tablet Extended Release""70475""Scleroderma""5""0.416667"

"29840""Pentoxifylline CR 400 MG Oral Tablet Extended Release""168530""Chronic Nondecubitus Ulcer Of The Ankle""2""0.4"

"29840""Pentoxifylline CR 400 MG Oral Tablet Extended Release""282672""Venous Insufficiency""2""0.25"

"29868""Warfarin Sodium 4 MG Oral Tablet""62916""Atrial Fibrillation""14""0.466667"

"29868""Warfarin Sodium 4 MG Oral Tablet""62917""Paroxysmal Atrial Fibrillation""2""0.666667"

"29868""Warfarin Sodium 4 MG Oral Tablet""64277""Pulmonary Embolism""3""0.6"

"29868""Warfarin Sodium 4 MG Oral Tablet""257802""Venous Thrombosis Of The Deep Vessels Of The Lower Extremity""2""0.333333"

"29868""Warfarin Sodium 4 MG Oral Tablet""296985""Acute Venous Thrombosis Of The Deep Vessels Of The Lower Extremity""2""0.666667"

"29913""Melatonin 5 MG Oral Capsule""79017""Hepatocellular Carcinoma Of The Liver""2""1"

"29913""Melatonin 5 MG Oral Capsule""80831""Adenocarcinoma Of The Prostate Gland""2""0.666667"

"29913""Melatonin 5 MG Oral Capsule""80847""Renal Cell Carcinoma""7""0.875"

"29913""Melatonin 5 MG Oral Capsule""181372""Renal Carcinoma""2""1"

"29913""Melatonin 5 MG Oral Capsule""260898""Kidney Cancer""2""0.5"

"29913""Melatonin 5 MG Oral Capsule""278812""Prostate Cancer""12""0.75"

"29961""Niaspan 500 MG Oral Tablet Extended Release""62975""Coronary Artery Disease""13""0.101562"

"29961""Niaspan 500 MG Oral Tablet Extended Release""67970""Hyperlipidemia""123""0.559091"

"29961""Niaspan 500 MG Oral Tablet Extended Release""67978""Familial Hypercholesterolemia""2""0.5"

"29961""Niaspan 500 MG Oral Tablet Extended Release""67988""Familial Hypertriglyceridemia""3""0.428571"

"29961""Niaspan 500 MG Oral Tablet Extended Release""69402""Diabetes Mellitus Poorly Controlled""5""0.111111"

"29961""Niaspan 500 MG Oral Tablet Extended Release""257908""Essential Hypertriglyceridemia""4""0.333333"

"29961""Niaspan 500 MG Oral Tablet Extended Release""283291""Hypercholesterolemia""2""0.285714"

"29961""Niaspan 500 MG Oral Tablet Extended Release""283292""Essential Hypercholesterolemia""11""0.458333"

"29961""Niaspan 500 MG Oral Tablet Extended Release""291485""Dyslipidemia""13""0.382353"

"29962""Niaspan 1000 MG Oral Tablet Extended Release""67970""Hyperlipidemia""45""0.523256"

"29962""Niaspan 1000 MG Oral Tablet Extended Release""283291""Hypercholesterolemia""3""1"

"29962""Niaspan 1000 MG Oral Tablet Extended Release""291485""Dyslipidemia""10""0.714286"

"29971""Imitrex 20 MG/ACT Nasal Solution""74533""Migraine Headache""4""0.8"

"30018""Combivir 150-300 MG Oral Tablet""76835""HIV Infection""25""0.657895"

"30018""Combivir 150-300 MG Oral Tablet""76842""Acquired Immunodeficiency Syndrome (AIDS)""5""0.454545"

"30025""SEROquel 25 MG Oral Tablet""61048""Memory Lapses Or Loss""5""0.277778"

"30025""SEROquel 25 MG Oral Tablet""61118""Anxiety (Symptom)""4""0.235294"

"30025""SEROquel 25 MG Oral Tablet""61234""Hallucinations (Imagined Perceptions Not Based In Reality)""2""1"

"30025""SEROquel 25 MG Oral Tablet""75020""Alzheimer's Disease""8""0.258065"

"30025""SEROquel 25 MG Oral Tablet""75080""Parkinson's Disease""4""0.190476"

"30025""SEROquel 25 MG Oral Tablet""75834""Disruptive Behavior Disorder""2""1"

"30025""SEROquel 25 MG Oral Tablet""75835""Disruptive Behavior Disorder, Childhood Onset""3""1"

"30025""SEROquel 25 MG Oral Tablet""76212""Psychosis""7""0.7"

"30025""SEROquel 25 MG Oral Tablet""76290""Atypical Psychosis""2""1"

"30025""SEROquel 25 MG Oral Tablet""76306""Episodic Mood Disorders""2""0.333333"

"30025""SEROquel 25 MG Oral Tablet""76307""Bipolar Disorder""5""0.416667"

"30025""SEROquel 25 MG Oral Tablet""76351""Depression""14""0.208955"

"30025""SEROquel 25 MG Oral Tablet""76352""Major Depression, Single Episode""2""0.5"

"30025""SEROquel 25 MG Oral Tablet""76361""Moderate Recurrent Major Depression""2""0.4"

"30025""SEROquel 25 MG Oral Tablet""76388""Bipolar Disorder NOS""3""0.428571"

"30025"|"SEROquel 25 MG Oral Tablet"|"76587"|"Anxiety Disorder NOS"|"2"|"0.4"  
"30025"|"SEROquel 25 MG Oral Tablet"|"163354"|"Demonstrated Behavior Psychomotor Agitation"|"3"|"0.6"  
"30025"|"SEROquel 25 MG Oral Tablet"|"163837"|"Hallucination Visual"|"9"|"0.818182"  
"30025"|"SEROquel 25 MG Oral Tablet"|"173457"|"Dementia Of Known (Axis III) Etiology With Behavioral Disturbance"|"2"|"1"  
"30025"|"SEROquel 25 MG Oral Tablet"|"251600"|"Dementia"|"23"|"0.479167"  
"30025"|"SEROquel 25 MG Oral Tablet"|"252575"|"Dementia With Lewy Bodies"|"4"|"0.5"  
"30025"|"SEROquel 25 MG Oral Tablet"|"275483"|"Dementia Of Alzheimer's Type"|"2"|"0.5"  
"30025"|"SEROquel 25 MG Oral Tablet"|"275592"|"Post-traumatic Stress Disorder"|"2"|"0.333333"  
"30025"|"SEROquel 25 MG Oral Tablet"|"289876"|"Alzheimer's Disease With Behavioral Disturbance"|"7"|"0.538462"  
"30026"|"SEROquel 100 MG Oral Tablet"|"30261"|"Bipolar I Disorder, Most Recent Episode, Depressed - Severe With Psychotic Features"|"4"|"1"  
"30026"|"SEROquel 100 MG Oral Tablet"|"61108"|"Insomnia"|"3"|"0.1875"  
"30026"|"SEROquel 100 MG Oral Tablet"|"75020"|"Alzheimer's Disease"|"2"|"0.285714"  
"30026"|"SEROquel 100 MG Oral Tablet"|"76306"|"Episodic Mood Disorders"|"2"|"0.666667"  
"30026"|"SEROquel 100 MG Oral Tablet"|"76307"|"Bipolar Disorder"|"4"|"0.4"  
"30026"|"SEROquel 100 MG Oral Tablet"|"76329"|"Bipolar I Disorder, Most Recent Episode, Mixed In Partial Remission"|"2"|"0.666667"  
"30026"|"SEROquel 100 MG Oral Tablet"|"76343"|"Bipolar I Disorder, Most Recent Episode, Depressed - Moderate"|"3"|"1"  
"30026"|"SEROquel 100 MG Oral Tablet"|"76348"|"Bipolar II Disorder"|"7"|"1"  
"30026"|"SEROquel 100 MG Oral Tablet"|"76351"|"Depression"|"6"|"0.214286"  
"30026"|"SEROquel 100 MG Oral Tablet"|"76357"|"Major Depression, Recurrent"|"3"|"0.6"  
"30026"|"SEROquel 100 MG Oral Tablet"|"76361"|"Moderate Recurrent Major Depression"|"2"|"0.666667"  
"30026"|"SEROquel 100 MG Oral Tablet"|"76388"|"Bipolar Disorder NOS"|"9"|"0.473684"  
"30026"|"SEROquel 100 MG Oral Tablet"|"252573"|"Frontotemporal Dementia"|"2"|"1"  
"30026"|"SEROquel 100 MG Oral Tablet"|"275592"|"Post-traumatic Stress Disorder"|"2"|"0.4"  
"30031"|"Avapro 150 MG Oral Tablet"|"63467"|"Hypertension"|"24"|"0.387097"  
"30031"|"Avapro 150 MG Oral Tablet"|"63468"|"Essential Hypertension"|"7"|"0.304348"  
"30031"|"Avapro 150 MG Oral Tablet"|"63470"|"Benign Essential Hypertension"|"9"|"0.321429"  
"30032"|"Avapro 300 MG Oral Tablet"|"63467"|"Hypertension"|"20"|"0.408163"  
"30032"|"Avapro 300 MG Oral Tablet"|"63468"|"Essential Hypertension"|"8"|"0.333333"  
"30032"|"Avapro 300 MG Oral Tablet"|"63470"|"Benign Essential Hypertension"|"18"|"0.5625"  
"30055"|"Aspir-81 81 MG Oral Tablet Delayed Release"|"62916"|"Atrial Fibrillation"|"2"|"0.222222"  
"30055"|"Aspir-81 81 MG Oral Tablet Delayed Release"|"62975"|"Coronary Artery Disease"|"4"|"0.166667"  
"30055"|"Aspir-81 81 MG Oral Tablet Delayed Release"|"63765"|"Carotid Artery Stenosis"|"2"|"0.4"  
"30055"|"Aspir-81 81 MG Oral Tablet Delayed Release"|"75354"|"Cerebral Artery Thrombosis - With Cerebral Infarction"|"3"|"0.333333"  
"30101"|"Arthrotec 75-200 MG-MCG Oral Tablet"|"70706"|"Ankylosing Spondylitis"|"4"|"1"  
"30150"|"Tobi 300 MG/5ML Inhalation Nebulization Solution"|"32925"|"Chronic Respiratory Failure"|"4"|"0.444444"  
"30150"|"Tobi 300 MG/5ML Inhalation Nebulization Solution"|"62718"|"Tracheitis"|"3"|"0.3"  
"30150"|"Tobi 300 MG/5ML Inhalation Nebulization Solution"|"62719"|"Acute Tracheitis"|"3"|"0.5"  
"30150"|"Tobi 300 MG/5ML Inhalation Nebulization Solution"|"64223"|"Bronchiectasis"|"2"|"0.4"  
"30150"|"Tobi 300 MG/5ML Inhalation Nebulization Solution"|"67695"|"Cystic Fibrosis"|"8"|"0.470588"  
"30150"|"Tobi 300 MG/5ML Inhalation Nebulization Solution"|"278128"|"Chronic Lung Disease Of Newborn"|"2"|"0.5"  
"30152"|"Propecia 1 MG Oral Tablet"|"138023"|"Alopecia"|"11"|"0.578947"  
"30171"|"Butalbital-ASA-Caffeine 50-325-40 MG Oral Capsule"|"60828"|"Headache"|"4"|"0.8"  
"30171"|"Butalbital-ASA-Caffeine 50-325-40 MG Oral Capsule"|"74533"|"Migraine Headache"|"3"|"0.333333"  
"30182"|"Prevpac Oral Miscellaneous"|"64764"|"Gastritis Due To H. Pylori"|"2"|"0.666667"  
"30182"|"Prevpac Oral Miscellaneous"|"76976"|"Helicobacter Pylori (H. Pylori) Infection"|"7"|"0.636364"  
"30182"|"Prevpac Oral Miscellaneous"|"87736"|"Abdominal Pain In The Central Upper Belly (Epigastric)"|"3"|"0.6"  
"30195"|"Carbatrol 200 MG Oral Capsule Extended Release 12 Hour"|"74988"|"Seizure Disorder"|"3"|"0.25"  
"30195"|"Carbatrol 200 MG Oral Capsule Extended Release 12 Hour"|"75001"|"Partial Complex Psychomotor

Seizure"|"2"|"1"  
"30195"|"Carbatrol 200 MG Oral Capsule Extended Release 12 Hour"|"75002"|"Partial Complex Psychomotor Seizure With Intractable Seizure"|"4"|"0.571429"  
"30195"|"Carbatrol 200 MG Oral Capsule Extended Release 12 Hour"|"252566"|"Partial Complex Seizure"|"2"|"0.4"  
"30202"|"Tasmar 100 MG Oral Tablet"|"75080"|"Parkinson's Disease"|"2"|"1"  
"30224"|"Singulair 10 MG Oral Tablet"|"60869"|"Cough"|"18"|"0.191489"  
"30224"|"Singulair 10 MG Oral Tablet"|"62585"|"Chronic Sinusitis"|"4"|"0.173913"  
"30224"|"Singulair 10 MG Oral Tablet"|"62586"|"Chronic Maxillary Sinusitis"|"10"|"0.12987"  
"30224"|"Singulair 10 MG Oral Tablet"|"62588"|"Chronic Ethmoidal Sinusitis"|"20"|"0.243902"  
"30224"|"Singulair 10 MG Oral Tablet"|"62591"|"Nasal Polyps"|"4"|"0.125"  
"30224"|"Singulair 10 MG Oral Tablet"|"62598"|"Allergic Rhinitis"|"116"|"0.414286"  
"30224"|"Singulair 10 MG Oral Tablet"|"62599"|"Allergic Rhinitis Due To Pollen"|"4"|"0.5"  
"30224"|"Singulair 10 MG Oral Tablet"|"64181"|"Asthma"|"124"|"0.345404"  
"30224"|"Singulair 10 MG Oral Tablet"|"64183"|"Mild Persistent Asthma"|"5"|"0.416667"  
"30224"|"Singulair 10 MG Oral Tablet"|"64184"|"Moderate Persistent Asthma"|"4"|"0.363636"  
"30224"|"Singulair 10 MG Oral Tablet"|"64190"|"Exercise-induced Asthma"|"5"|"0.384615"  
"30224"|"Singulair 10 MG Oral Tablet"|"64205"|"Chronic Obstructive Pulmonary Disease"|"8"|"0.190476"  
"30224"|"Singulair 10 MG Oral Tablet"|"64294"|"Pulmonary Fibrosis"|"2"|"0.4"  
"30224"|"Singulair 10 MG Oral Tablet"|"166748"|"Asthma With Acute Exacerbation"|"5"|"0.138889"  
"30224"|"Singulair 10 MG Oral Tablet"|"258832"|"Cough Variant Asthma"|"5"|"0.227273"  
"30224"|"Singulair 10 MG Oral Tablet"|"297031"|"Intermittent Asthma"|"5"|"0.357143"  
"30258"|"Prandin 1 MG Oral Tablet"|"69380"|"Diabetes Mellitus"|"6"|"0.5"  
"30258"|"Prandin 1 MG Oral Tablet"|"69402"|"Diabetes Mellitus Poorly Controlled"|"2"|"0.666667"  
"30259"|"Prandin 2 MG Oral Tablet"|"69380"|"Diabetes Mellitus"|"2"|"0.222222"  
"30265"|"Potassium Citrate-Citric Acid 1100-334 MG/5ML Oral Solution"|"65655"|"Renal Tubular Acidosis"|"3"|"0.75"  
"30267"|"Diovan HCT 80-12.5 MG Oral Tablet"|"63467"|"Hypertension"|"15"|"0.294118"  
"30267"|"Diovan HCT 80-12.5 MG Oral Tablet"|"63468"|"Essential Hypertension"|"7"|"0.411765"  
"30267"|"Diovan HCT 80-12.5 MG Oral Tablet"|"63470"|"Benign Essential Hypertension"|"11"|"0.52381"  
"30268"|"Diovan HCT 160-12.5 MG Oral Tablet"|"63467"|"Hypertension"|"40"|"0.45977"  
"30268"|"Diovan HCT 160-12.5 MG Oral Tablet"|"63468"|"Essential Hypertension"|"12"|"0.413793"  
"30268"|"Diovan HCT 160-12.5 MG Oral Tablet"|"63470"|"Benign Essential Hypertension"|"18"|"0.486486"  
"30304"|"Bicillin C-R 1200000 UNIT/2ML Intramuscular Suspension"|"62760"|"Acute Pharyngitis"|"2"|"0.666667"  
"30304"|"Bicillin C-R 1200000 UNIT/2ML Intramuscular Suspension"|"166549"|"Acute Streptococcal Tonsillitis"|"5"|"1"  
"30304"|"Bicillin C-R 1200000 UNIT/2ML Intramuscular Suspension"|"274516"|"Acute Pharyngitis Streptococcus"|"2"|"1"  
"30304"|"Bicillin C-R 1200000 UNIT/2ML Intramuscular Suspension"|"274534"|"Acute Sore Throat"|"2"|"0.4"  
"30325"|"Detrol 1 MG Oral Tablet"|"65778"|"Urge And Stress Incontinence"|"2"|"1"  
"30327"|"Viagra 50 MG Oral Tablet"|"65952"|"Organic Impotence"|"2"|"1"  
"30327"|"Viagra 50 MG Oral Tablet"|"69387"|"Type I Diabetes Mellitus"|"2"|"0.666667"  
"30327"|"Viagra 50 MG Oral Tablet"|"75125"|"Multiple Sclerosis"|"2"|"1"  
"30327"|"Viagra 50 MG Oral Tablet"|"76651"|"Male Erectile Disorder"|"59"|"0.678161"  
"30327"|"Viagra 50 MG Oral Tablet"|"76658"|"Sexual Dysfunction, NOS"|"2"|"1"  
"30327"|"Viagra 50 MG Oral Tablet"|"76661"|"Male Erectile Disorder Due To Physical Condition"|"9"|"0.9"  
"30328"|"Viagra 100 MG Oral Tablet"|"61002"|"Changed Sexual Interest (Libido): Decreased"|"3"|"0.75"  
"30328"|"Viagra 100 MG Oral Tablet"|"63758"|"Raynaud's Disease"|"2"|"0.5"  
"30328"|"Viagra 100 MG Oral Tablet"|"65952"|"Organic Impotence"|"6"|"0.666667"  
"30328"|"Viagra 100 MG Oral Tablet"|"69588"|"Hypogonadism"|"3"|"0.142857"  
"30328"|"Viagra 100 MG Oral Tablet"|"69660"|"Chronic Cutaneous Ulcer"|"4"|"1"  
"30328"|"Viagra 100 MG Oral Tablet"|"76651"|"Male Erectile Disorder"|"117"|"0.78"  
"30328"|"Viagra 100 MG Oral Tablet"|"76661"|"Male Erectile Disorder Due To Physical Condition"|"6"|"0.75"  
"30328"|"Viagra 100 MG Oral Tablet"|"80830"|"Malignant Neoplasm Of The Prostate Gland"|"2"|"0.222222"  
"30333"|"Excedrin Migraine 250-250-65 MG Oral Tablet"|"60828"|"Headache"|"3"|"0.5"

"30355"|"Pacerone 200 MG Oral Tablet"|"62916"|"Atrial Fibrillation"|"3"|"0.230769"  
"30362"|"Xeloda 500 MG Oral Tablet"|"79066"|"Malignant Neoplasm Of The Gallbladder"|"2"|"1"  
"30362"|"Xeloda 500 MG Oral Tablet"|"79148"|"Malignant Pancreatic Neoplasm"|"2"|"1"  
"30362"|"Xeloda 500 MG Oral Tablet"|"260217"|"Esophageal Cancer"|"3"|"1"  
"30362"|"Xeloda 500 MG Oral Tablet"|"260319"|"Colon Cancer"|"2"|"0.5"  
"30362"|"Xeloda 500 MG Oral Tablet"|"278808"|"Breast Cancer"|"2"|"0.666667"  
"30367"|"Cortisporin-TC 3.3-3-10-0.5 MG/ML Otic Suspension"|"62322"|"Otitis Externa"|"6"|"0.857143"  
"30367"|"Cortisporin-TC 3.3-3-10-0.5 MG/ML Otic Suspension"|"62557"|"Eustachian Tube Block"|"2"|"0.666667"  
"30374"|"Prometrium 100 MG Oral Capsule"|"66076"|"Menopausal Disorder"|"4"|"0.8"  
"30374"|"Prometrium 100 MG Oral Capsule"|"195794"|"Symptomatic Menopause"|"5"|"0.555556"  
"30376"|"Bismuth 262 MG Oral Tablet Chewable"|"76976"|"Helicobacter Pylori (H. Pylori) Infection"|"2"|"1"  
"30437"|"Droxia 400 MG Oral Capsule"|"78011"|"Sickle Cell Anemia"|"2"|"1"  
"30437"|"Droxia 400 MG Oral Capsule"|"78035"|"Sickle Cell Hb-SS Disease"|"2"|"0.666667"  
"30438"|"Maxalt 5 MG Oral Tablet"|"74533"|"Migraine Headache"|"6"|"0.75"  
"30438"|"Maxalt 5 MG Oral Tablet"|"74534"|"Classic Migraine (With Aura)"|"3"|"0.6"  
"30438"|"Maxalt 5 MG Oral Tablet"|"75125"|"Multiple Sclerosis"|"2"|"0.666667"  
"30449"|"Cipro HC 0.2-1 % Otic Suspension"|"62322"|"Otitis Externa"|"3"|"0.6"  
"30449"|"Cipro HC 0.2-1 % Otic Suspension"|"62329"|"Acute Otitis Externa"|"3"|"0.5"  
"30480"|"Actonel 30 MG Oral Tablet"|"69340"|"Osteopenia"|"4"|"1"  
"30480"|"Actonel 30 MG Oral Tablet"|"69341"|"Osteoporosis"|"4"|"0.666667"  
"30593"|"Atacand 8 MG Oral Tablet"|"63468"|"Essential Hypertension"|"2"|"0.666667"  
"30594"|"Atacand 16 MG Oral Tablet"|"63467"|"Hypertension"|"11"|"0.5"  
"30600"|"Accu-Chek Comfort Curve In Vitro Strip"|"69380"|"Diabetes Mellitus"|"5"|"0.555556"  
"30600"|"Accu-Chek Comfort Curve In Vitro Strip"|"69381"|"Type II Diabetes Mellitus"|"3"|"0.428571"  
"30692"|"Enbrel 25 MG Subcutaneous Kit"|"70455"|"Rheumatoid Arthritis"|"16"|"0.727273"  
"30692"|"Enbrel 25 MG Subcutaneous Kit"|"70706"|"Ankylosing Spondylitis"|"3"|"0.6"  
"30692"|"Enbrel 25 MG Subcutaneous Kit"|"70719"|"Psoriatic Arthropathy"|"4"|"1"  
"30714"|"Micardis 40 MG Oral Tablet"|"63467"|"Hypertension"|"3"|"0.176471"  
"30714"|"Micardis 40 MG Oral Tablet"|"63468"|"Essential Hypertension"|"4"|"0.666667"  
"30714"|"Micardis 40 MG Oral Tablet"|"63470"|"Benign Essential Hypertension"|"3"|"0.428571"  
"30715"|"Micardis 80 MG Oral Tablet"|"63467"|"Hypertension"|"8"|"0.363636"  
"30715"|"Micardis 80 MG Oral Tablet"|"63468"|"Essential Hypertension"|"4"|"0.4"  
"30715"|"Micardis 80 MG Oral Tablet"|"63470"|"Benign Essential Hypertension"|"4"|"0.8"  
"30722"|"Hyzaar 100-25 MG Oral Tablet"|"63467"|"Hypertension"|"5"|"0.142857"  
"30722"|"Hyzaar 100-25 MG Oral Tablet"|"63468"|"Essential Hypertension"|"11"|"0.44"  
"30722"|"Hyzaar 100-25 MG Oral Tablet"|"63470"|"Benign Essential Hypertension"|"2"|"0.222222"  
"30735"|"Thyrogen 1.1 MG Intramuscular Solution Reconstituted"|"258928"|"Thyroid Cancer"|"6"|"0.666667"  
"30742"|"Ziagen 300 MG Oral Tablet"|"76835"|"HIV Infection"|"14"|"0.666667"  
"30742"|"Ziagen 300 MG Oral Tablet"|"76842"|"Acquired Immunodeficiency Syndrome (AIDS)"|"4"|"0.444444"  
"30743"|"Ziagen 20 MG/ML Oral Solution"|"76835"|"HIV Infection"|"6"|"0.75"  
"30761"|"CeleBREX 200 MG Oral Capsule"|"31947"|"Lumbago"|"2"|"0.222222"  
"30761"|"CeleBREX 200 MG Oral Capsule"|"70146"|"Osteoarthritis"|"22"|"0.431373"  
"30761"|"CeleBREX 200 MG Oral Capsule"|"70160"|"Localized Primary Osteoarthritis Of The Hand"|"2"|"0.666667"  
"30761"|"CeleBREX 200 MG Oral Capsule"|"70182"|"Localized Secondary Osteoarthritis Of The Hip"|"2"|"1"  
"30761"|"CeleBREX 200 MG Oral Capsule"|"70193"|"Localized Osteoarthritis Of The Knee"|"2"|"0.4"  
"30761"|"CeleBREX 200 MG Oral Capsule"|"70219"|"Osteoarthritis Of The Knee"|"7"|"0.466667"  
"30761"|"CeleBREX 200 MG Oral Capsule"|"70221"|"Osteoarthritis Of Multiple Sites"|"2"|"0.25"  
"30761"|"CeleBREX 200 MG Oral Capsule"|"70222"|"Osteoarthrosis"|"3"|"0.6"  
"30761"|"CeleBREX 200 MG Oral Capsule"|"70455"|"Rheumatoid Arthritis"|"31"|"0.607843"  
"30761"|"CeleBREX 200 MG Oral Capsule"|"70472"|"Systemic Lupus Erythematosus"|"2"|"0.25"  
"30761"|"CeleBREX 200 MG Oral Capsule"|"70475"|"Scleroderma"|"2"|"0.333333"  
"30761"|"CeleBREX 200 MG Oral Capsule"|"70702"|"Polyarthropathy Of Multiple Sites"|"2"|"1"  
"30761"|"CeleBREX 200 MG Oral Capsule"|"70703"|"Asymmetrical Polyarticular Inflammation"|"2"|"1"  
"30761"|"CeleBREX 200 MG Oral Capsule"|"70704"|"Symmetric Polyarticular Inflammation"|"2"|"0.285714"

"30761"|"CeleBREX 200 MG Oral Capsule"|"70706"|"Ankylosing Spondylitis"|"23"|"0.766667"  
"30761"|"CeleBREX 200 MG Oral Capsule"|"70719"|"Psoriatic Arthropathy"|"6"|"0.6"  
"30761"|"CeleBREX 200 MG Oral Capsule"|"70722"|"Spondylitis"|"7"|"0.7"  
"30761"|"CeleBREX 200 MG Oral Capsule"|"73666"|"Backache"|"6"|"0.2"  
"30761"|"CeleBREX 200 MG Oral Capsule"|"75812"|"Myalgia And Myositis"|"2"|"0.25"  
"30761"|"CeleBREX 200 MG Oral Capsule"|"80847"|"Renal Cell Carcinoma"|"2"|"1"  
"30761"|"CeleBREX 200 MG Oral Capsule"|"85614"|"Joint Pain, Localized In The Hip"|"4"|"0.266667"  
"30761"|"CeleBREX 200 MG Oral Capsule"|"85623"|"Joint Pain, Localized In The Knee"|"12"|"0.272727"  
"30761"|"CeleBREX 200 MG Oral Capsule"|"85701"|"Joint Pain, Localized In The Shoulder"|"7"|"0.259259"  
"30761"|"CeleBREX 200 MG Oral Capsule"|"85707"|"Back Pain"|"2"|"0.5"  
"30761"|"CeleBREX 200 MG Oral Capsule"|"91089"|"Lower Back Pain"|"10"|"0.333333"  
"30761"|"CeleBREX 200 MG Oral Capsule"|"153808"|"Knee Swelling"|"2"|"1"  
"30761"|"CeleBREX 200 MG Oral Capsule"|"251467"|"Limb Pain"|"4"|"0.25"  
"30761"|"CeleBREX 200 MG Oral Capsule"|"278685"|"Arthralgias In Multiple Sites"|"6"|"0.428571"  
"30761"|"CeleBREX 200 MG Oral Capsule"|"278812"|"Prostate Cancer"|"6"|"0.333333"  
"30761"|"CeleBREX 200 MG Oral Capsule"|"288977"|"Fibromyalgia"|"5"|"0.263158"  
"30761"|"CeleBREX 200 MG Oral Capsule"|"296649"|"Diffuse Connective Tissue Disorder"|"2"|"1"  
"30761"|"CeleBREX 200 MG Oral Capsule"|"297053"|"Reactive Arthritis"|"2"|"1"  
"30773"|"Cozaar 100 MG Oral Tablet"|"63467"|"Hypertension"|"9"|"0.176471"  
"30773"|"Cozaar 100 MG Oral Tablet"|"63470"|"Benign Essential Hypertension"|"6"|"0.3"  
"30781"|"HumaLOG Pen 100 UNIT/ML SOLN"|"69380"|"Diabetes Mellitus"|"6"|"0.428571"  
"30781"|"HumaLOG Pen 100 UNIT/ML SOLN"|"69381"|"Type II Diabetes Mellitus"|"2"|"0.666667"  
"30781"|"HumaLOG Pen 100 UNIT/ML SOLN"|"69387"|"Type I Diabetes Mellitus"|"5"|"0.714286"  
"30781"|"HumaLOG Pen 100 UNIT/ML SOLN"|"69388"|"Type I Diabetes Mellitus - Uncontrolled"|"2"|"0.333333"  
"30781"|"HumaLOG Pen 100 UNIT/ML SOLN"|"69402"|"Diabetes Mellitus Poorly Controlled"|"2"|"0.5"  
"30821"|"Kristalose 10 GM Oral Packet"|"166777"|"Constipation"|"11"|"0.916667"  
"30833"|"Coenzyme Q10 100 MG Oral Capsule"|"67970"|"Hyperlipidemia"|"5"|"0.454545"  
"30833"|"Coenzyme Q10 100 MG Oral Capsule"|"257912"|"Disorder Of Mitochondrial Metabolism"|"15"|"0.789474"  
"30844"|"Butalbital-APAP 50-325 MG Oral Tablet"|"60828"|"Headache"|"4"|"1"  
"30844"|"Butalbital-APAP 50-325 MG Oral Tablet"|"74533"|"Migraine Headache"|"2"|"0.5"  
"30847"|"Provigil 100 MG Oral Tablet"|"75125"|"Multiple Sclerosis"|"3"|"0.176471"  
"30847"|"Provigil 100 MG Oral Tablet"|"76357"|"Major Depression, Recurrent"|"2"|"0.666667"  
"30847"|"Provigil 100 MG Oral Tablet"|"76404"|"Sleep-wake Schedule Disorder, Frequently Changing"|"2"|"1"  
"30847"|"Provigil 100 MG Oral Tablet"|"76409"|"Narcolepsy"|"5"|"0.625"  
"30847"|"Provigil 100 MG Oral Tablet"|"173466"|"Obstructive Sleep Apnea"|"2"|"0.25"  
"30847"|"Provigil 100 MG Oral Tablet"|"252573"|"Frontotemporal Dementia"|"2"|"1"  
"30847"|"Provigil 100 MG Oral Tablet"|"252681"|"Fatigue"|"2"|"0.285714"  
"30847"|"Provigil 100 MG Oral Tablet"|"275545"|"Organic Hypersomnia"|"2"|"0.666667"  
"30849"|"Magnesium Oxide 400 MG Oral Capsule"|"68109"|"Hypomagnesemia"|"4"|"1"  
"30899"|"Zebutal 50-500-40 MG Oral Capsule"|"74534"|"Classic Migraine (With Aura)"|"2"|"1"  
"30934"|"Vivelle-Dot 0.05 MG/24HR Transdermal Patch Biweekly"|"66076"|"Menopausal Disorder"|"2"|"0.5"  
"30961"|"Xopenex 0.63 MG/3ML Inhalation Nebulization Solution"|"32925"|"Chronic Respiratory Failure"|"5"|"0.714286"  
"30961"|"Xopenex 0.63 MG/3ML Inhalation Nebulization Solution"|"60869"|"Cough"|"2"|"0.333333"  
"30961"|"Xopenex 0.63 MG/3ML Inhalation Nebulization Solution"|"64118"|"Acute Bronchitis"|"2"|"0.4"  
"30961"|"Xopenex 0.63 MG/3ML Inhalation Nebulization Solution"|"64180"|"Reactive Airway Disease"|"2"|"0.2"  
"30961"|"Xopenex 0.63 MG/3ML Inhalation Nebulization Solution"|"64181"|"Asthma"|"5"|"0.172414"  
"30961"|"Xopenex 0.63 MG/3ML Inhalation Nebulization Solution"|"64202"|"Bronchiolitis"|"2"|"1"  
"30961"|"Xopenex 0.63 MG/3ML Inhalation Nebulization Solution"|"64205"|"Chronic Obstructive Pulmonary Disease"|"9"|"0.642857"  
"30961"|"Xopenex 0.63 MG/3ML Inhalation Nebulization Solution"|"64223"|"Bronchiectasis"|"2"|"0.5"  
"30961"|"Xopenex 0.63 MG/3ML Inhalation Nebulization Solution"|"166748"|"Asthma With Acute Exacerbation"|"2"|"0.4"  
"30962"|"Xopenex 1.25 MG/3ML Inhalation Nebulization Solution"|"60869"|"Cough"|"3"|"0.375"

"30962"|"Xopenex 1.25 MG/3ML Inhalation Nebulization Solution"|"63484"|"Pulmonary Hypertension"|"2"|"0.4"  
"30962"|"Xopenex 1.25 MG/3ML Inhalation Nebulization Solution"|"64181"|"Asthma"|"12"|"0.315789"  
"30962"|"Xopenex 1.25 MG/3ML Inhalation Nebulization Solution"|"64205"|"Chronic Obstructive Pulmonary  
Disease"|"7"|"0.538462"  
"30962"|"Xopenex 1.25 MG/3ML Inhalation Nebulization Solution"|"77891"|"Acute Upper Respiratory  
Infection"|"2"|"0.222222"  
"30969"|"Ortho-Novum 7/7/7 (28) 0.5/0.75/1-35 MG-MCG Oral Tablet"|"250989"|"Oral Contraceptives"|"2"|"1"  
"30987"|"Ortho-Novum 1/35 (28) 1-35 MG-MCG Oral Tablet"|"66070"|"Menorrhagia"|"3"|"0.5"  
"30987"|"Ortho-Novum 1/35 (28) 1-35 MG-MCG Oral Tablet"|"69546"|"Dysfunctional Uterine Bleeding"|"3"|"0.5"  
"30988"|"Ovcon-35 (28) 0.4-35 MG-MCG Oral Tablet"|"66070"|"Menorrhagia"|"2"|"0.666667"  
"30988"|"Ovcon-35 (28) 0.4-35 MG-MCG Oral Tablet"|"69549"|"Polycystic Ovarian Syndrome"|"2"|"0.333333"  
"30992"|"Necon 1/35 (28) 1-35 MG-MCG Oral Tablet"|"88052"|"Bleeding Between Periods"|"2"|"1"  
"30992"|"Necon 1/35 (28) 1-35 MG-MCG Oral Tablet"|"187792"|"Gynecologic Services Contraceptive  
Management"|"2"|"0.666667"  
"30992"|"Necon 1/35 (28) 1-35 MG-MCG Oral Tablet"|"250989"|"Oral Contraceptives"|"2"|"1"  
"30995"|"Levora 0.15/30 (28) 0.15-30 MG-MCG Oral Tablet"|"187795"|"Gynecologic Services Prescription Of  
Contraceptive Agents"|"2"|"1"  
"30995"|"Levora 0.15/30 (28) 0.15-30 MG-MCG Oral Tablet"|"250989"|"Oral Contraceptives"|"3"|"1"  
"31005"|"Avalide 150-12.5 MG Oral Tablet"|"63467"|"Hypertension"|"10"|"0.357143"  
"31005"|"Avalide 150-12.5 MG Oral Tablet"|"63468"|"Essential Hypertension"|"5"|"0.384615"  
"31005"|"Avalide 150-12.5 MG Oral Tablet"|"63470"|"Benign Essential Hypertension"|"4"|"0.5"  
"31034"|"Chlorhexidine Gluconate 20 % Solution"|"278552"|"Furunculosis"|"2"|"1"  
"31037"|"Glucagon Emergency 1 MG Injection Kit"|"69387"|"Type I Diabetes Mellitus"|"22"|"0.415094"  
"31037"|"Glucagon Emergency 1 MG Injection Kit"|"69388"|"Type I Diabetes Mellitus -  
Uncontrolled"|"96"|"0.834783"  
"31037"|"Glucagon Emergency 1 MG Injection Kit"|"69402"|"Diabetes Mellitus Poorly Controlled"|"6"|"0.5"  
"31037"|"Glucagon Emergency 1 MG Injection Kit"|"69456"|"Hypoglycemia"|"3"|"1"  
"31047"|"Verapamil HCl CR 120 MG Oral Capsule Extended Release 24  
Hour"|"63467"|"Hypertension"|"4"|"0.444444"  
"31047"|"Verapamil HCl CR 120 MG Oral Capsule Extended Release 24 Hour"|"63470"|"Benign Essential  
Hypertension"|"4"|"1"  
"31053"|"Avandia 4 MG Oral Tablet"|"69380"|"Diabetes Mellitus"|"2"|"0.285714"  
"31081"|"Ru-Tuss DM 45-15-100 MG/5ML Oral Syrup"|"60869"|"Cough"|"2"|"1"  
"31136"|"Actos 30 MG Oral Tablet"|"69380"|"Diabetes Mellitus"|"33"|"0.336735"  
"31136"|"Actos 30 MG Oral Tablet"|"69381"|"Type II Diabetes Mellitus"|"21"|"0.396226"  
"31136"|"Actos 30 MG Oral Tablet"|"69382"|"Type II Diabetes Mellitus - Uncomplicated,  
Uncontrolled"|"4"|"0.222222"  
"31136"|"Actos 30 MG Oral Tablet"|"69401"|"Diabetes Mellitus Under Control"|"7"|"0.875"  
"31136"|"Actos 30 MG Oral Tablet"|"69402"|"Diabetes Mellitus Poorly Controlled"|"25"|"0.568182"  
"31136"|"Actos 30 MG Oral Tablet"|"69549"|"Polycystic Ovarian Syndrome"|"2"|"0.4"  
"31137"|"Actos 45 MG Oral Tablet"|"69380"|"Diabetes Mellitus"|"24"|"0.461538"  
"31137"|"Actos 45 MG Oral Tablet"|"69381"|"Type II Diabetes Mellitus"|"11"|"0.354839"  
"31137"|"Actos 45 MG Oral Tablet"|"69382"|"Type II Diabetes Mellitus - Uncomplicated, Uncontrolled"|"6"|"0.6"  
"31137"|"Actos 45 MG Oral Tablet"|"69402"|"Diabetes Mellitus Poorly Controlled"|"4"|"0.285714"  
"31137"|"Actos 45 MG Oral Tablet"|"258942"|"Type II Diabetes Mellitus - Uncomplicated, Controlled"|"3"|"0.6"  
"31259"|"PROzac 40 MG Oral Capsule"|"76351"|"Depression"|"2"|"0.222222"  
"31260"|"Low-Ogestrel 0.3-30 MG-MCG Oral Tablet"|"250989"|"Oral Contraceptives"|"2"|"0.666667"  
"31309"|"Lidoderm 5 % External Patch"|"70146"|"Osteoarthritis"|"16"|"0.4"  
"31309"|"Lidoderm 5 % External Patch"|"70219"|"Osteoarthritis Of The Knee"|"5"|"0.3125"  
"31309"|"Lidoderm 5 % External Patch"|"70455"|"Rheumatoid Arthritis"|"9"|"0.346154"  
"31309"|"Lidoderm 5 % External Patch"|"70475"|"Scleroderma"|"2"|"0.666667"  
"31309"|"Lidoderm 5 % External Patch"|"73666"|"Backache"|"7"|"0.269231"  
"31309"|"Lidoderm 5 % External Patch"|"75579"|"Spondylosis Without Myelopathy"|"4"|"1"  
"31309"|"Lidoderm 5 % External Patch"|"75587"|"Lumbar Canal Stenosis"|"2"|"0.333333"

"31309"|"Lidoderm 5 % External Patch"|"75601"|"Polyneuropathy"|"2"|"0.25"

"31309"|"Lidoderm 5 % External Patch"|"75613"|"Postherpetic Polyneuropathy"|"2"|"0.4"

"31309"|"Lidoderm 5 % External Patch"|"76610"|"Chronic Pain Syndrome"|"2"|"0.25"

"31309"|"Lidoderm 5 % External Patch"|"85623"|"Joint Pain, Localized In The Knee"|"8"|"0.32"

"31309"|"Lidoderm 5 % External Patch"|"85658"|"Diffuse Joint Pains (Arthralgias)"|"2"|"0.5"

"31309"|"Lidoderm 5 % External Patch"|"85691"|"Neck Pain"|"2"|"0.285714"

"31309"|"Lidoderm 5 % External Patch"|"85701"|"Joint Pain, Localized In The Shoulder"|"3"|"0.25"

"31309"|"Lidoderm 5 % External Patch"|"90952"|"Joint Pain, Localized In The Left Shoulder"|"2"|"0.666667"

"31309"|"Lidoderm 5 % External Patch"|"91089"|"Lower Back Pain"|"26"|"0.45614"

"31309"|"Lidoderm 5 % External Patch"|"91115"|"Lower Back Pain Chronic"|"2"|"0.5"

"31309"|"Lidoderm 5 % External Patch"|"115846"|"Back Muscle Spasm"|"2"|"0.4"

"31309"|"Lidoderm 5 % External Patch"|"251467"|"Limb Pain"|"3"|"0.15"

"31309"|"Lidoderm 5 % External Patch"|"257996"|"Arthritis"|"9"|"0.25"

"31309"|"Lidoderm 5 % External Patch"|"288921"|"Chronic Pain"|"8"|"0.307692"

"31470"|"GlucaGen 1 MG Injection Solution Reconstituted"|"69388"|"Type I Diabetes Mellitus - Uncontrolled"|"3"|"1"

"31482"|"Prometrium 200 MG Oral Capsule"|"66015"|"Ovarian Disorders"|"2"|"1"

"31482"|"Prometrium 200 MG Oral Capsule"|"66139"|"Amenorrhea"|"4"|"0.8"

"31482"|"Prometrium 200 MG Oral Capsule"|"69549"|"Polycystic Ovarian Syndrome"|"3"|"0.75"

"31482"|"Prometrium 200 MG Oral Capsule"|"69551"|"Ovarian Failure"|"4"|"0.8"

"31482"|"Prometrium 200 MG Oral Capsule"|"167200"|"Premature Menopause"|"4"|"0.8"

"31482"|"Prometrium 200 MG Oral Capsule"|"195794"|"Symptomatic Menopause"|"2"|"0.5"

"31483"|"Tamiflu 75 MG Oral Capsule"|"64119"|"Influenza"|"33"|"0.622642"

"31483"|"Tamiflu 75 MG Oral Capsule"|"64120"|"Influenza Type A"|"6"|"0.75"

"31483"|"Tamiflu 75 MG Oral Capsule"|"76702"|"Viral Infection"|"5"|"0.714286"

"31483"|"Tamiflu 75 MG Oral Capsule"|"77891"|"Acute Upper Respiratory Infection"|"11"|"0.354839"

"31483"|"Tamiflu 75 MG Oral Capsule"|"250613"|"Fever (On Exam)"|"2"|"0.666667"

"31483"|"Tamiflu 75 MG Oral Capsule"|"277898"|"Influenza A(H2N2)"|"2"|"1"

"31483"|"Tamiflu 75 MG Oral Capsule"|"277900"|"Influenza With Other URI Manifestations"|"3"|"0.375"

"31541"|"Lodosyn 25 MG Oral Tablet"|"75080"|"Parkinson's Disease"|"2"|"0.666667"

"31564"|"Aggrenox 25-200 MG Oral Capsule Extended Release 12 Hour"|"75032"|"Vascular Dementia"|"2"|"0.285714"

"31564"|"Aggrenox 25-200 MG Oral Capsule Extended Release 12 Hour"|"75153"|"Transient Ischemic Attack"|"5"|"0.2"

"31564"|"Aggrenox 25-200 MG Oral Capsule Extended Release 12 Hour"|"75354"|"Cerebral Artery Thrombosis - With Cerebral Infarction"|"6"|"0.545455"

"31564"|"Aggrenox 25-200 MG Oral Capsule Extended Release 12 Hour"|"75356"|"Cerebral Embolism - With Cerebral Infarction"|"3"|"0.333333"

"31564"|"Aggrenox 25-200 MG Oral Capsule Extended Release 12 Hour"|"201186"|"Ischemic Stroke"|"3"|"0.2"

"31582"|"Avelox 400 MG Oral Tablet"|"60869"|"Cough"|"7"|"0.269231"

"31582"|"Avelox 400 MG Oral Tablet"|"62577"|"Sinusitis"|"2"|"0.5"

"31582"|"Avelox 400 MG Oral Tablet"|"62578"|"Acute Sinusitis"|"6"|"0.461538"

"31582"|"Avelox 400 MG Oral Tablet"|"62580"|"Acute Maxillary Sinusitis"|"2"|"0.333333"

"31582"|"Avelox 400 MG Oral Tablet"|"62582"|"Acute Ethmoidal Sinusitis"|"4"|"0.5"

"31582"|"Avelox 400 MG Oral Tablet"|"62585"|"Chronic Sinusitis"|"3"|"0.375"

"31582"|"Avelox 400 MG Oral Tablet"|"62588"|"Chronic Ethmoidal Sinusitis"|"13"|"0.464286"

"31582"|"Avelox 400 MG Oral Tablet"|"63484"|"Pulmonary Hypertension"|"3"|"0.25"

"31582"|"Avelox 400 MG Oral Tablet"|"64118"|"Acute Bronchitis"|"13"|"0.565217"

"31582"|"Avelox 400 MG Oral Tablet"|"64159"|"Atypical Mycobacterium Avium Intracellulare Pneumonia"|"2"|"1"

"31582"|"Avelox 400 MG Oral Tablet"|"64205"|"Chronic Obstructive Pulmonary Disease"|"5"|"0.238095"

"31582"|"Avelox 400 MG Oral Tablet"|"64206"|"Chronic Bronchitis"|"2"|"0.5"

"31582"|"Avelox 400 MG Oral Tablet"|"64223"|"Bronchiectasis"|"3"|"0.6"

"31582"|"Avelox 400 MG Oral Tablet"|"70620"|"Sarcoidosis"|"2"|"0.333333"

"31582"|"Avelox 400 MG Oral Tablet"|"74027"|"Osteomyelitis"|"4"|"0.666667"

"31582"|"Avelox 400 MG Oral Tablet"|"77890"|"Upper Respiratory Infection"|"3"|"0.25"

"31582"|"Avelox 400 MG Oral Tablet"|"77891"|"Acute Upper Respiratory Infection"|"4"|"0.181818"  
"31582"|"Avelox 400 MG Oral Tablet"|"85607"|"Fever (Symptom)"|"2"|"1"  
"31582"|"Avelox 400 MG Oral Tablet"|"166743"|"Community-acquired Pneumonia"|"2"|"0.333333"  
"31582"|"Avelox 400 MG Oral Tablet"|"251528"|"Acute Otitis Media"|"2"|"0.4"  
"31636"|"Icar 15 MG/1.25ML Oral Suspension"|"77962"|"Anemia"|"4"|"0.444444"  
"31636"|"Icar 15 MG/1.25ML Oral Suspension"|"77968"|"Iron Deficiency"|"2"|"0.5"  
"31659"|"Trileptal 150 MG Oral Tablet"|"75124"|"Demyelinating Disorders"|"2"|"0.666667"  
"31659"|"Trileptal 150 MG Oral Tablet"|"75125"|"Multiple Sclerosis"|"4"|"0.571429"  
"31659"|"Trileptal 150 MG Oral Tablet"|"75486"|"Trigeminal Neuralgia"|"2"|"1"  
"31660"|"Femhrt 1/5 1-5 MG-MCG Oral Tablet"|"60977"|"Menopause Has Occurred"|"4"|"0.8"  
"31660"|"Femhrt 1/5 1-5 MG-MCG Oral Tablet"|"195794"|"Symptomatic Menopause"|"3"|"1"  
"31676"|"Nitrolingual 0.4 MG/SPRAY Translingual Solution"|"62975"|"Coronary Artery Disease"|"10"|"0.4"  
"31678"|"Tikosyn 125 MCG Oral Capsule"|"62916"|"Atrial Fibrillation"|"2"|"1"  
"31679"|"Tikosyn 250 MCG Oral Capsule"|"62916"|"Atrial Fibrillation"|"4"|"0.8"  
"31710"|"Precision Xtra Blood Glucose In Vitro Strip"|"69380"|"Diabetes Mellitus"|"4"|"0.285714"  
"31710"|"Precision Xtra Blood Glucose In Vitro Strip"|"69381"|"Type II Diabetes Mellitus"|"3"|"0.428571"  
"31710"|"Precision Xtra Blood Glucose In Vitro Strip"|"69402"|"Diabetes Mellitus Poorly Controlled"|"2"|"0.5"  
"31712"|"Singulair 4 MG Oral Tablet Chewable"|"60869"|"Cough"|"3"|"0.333333"  
"31712"|"Singulair 4 MG Oral Tablet Chewable"|"62585"|"Chronic Sinusitis"|"2"|"0.333333"  
"31712"|"Singulair 4 MG Oral Tablet Chewable"|"62598"|"Allergic Rhinitis"|"51"|"0.481132"  
"31712"|"Singulair 4 MG Oral Tablet Chewable"|"64180"|"Reactive Airway Disease"|"4"|"0.129032"  
"31712"|"Singulair 4 MG Oral Tablet Chewable"|"64181"|"Asthma"|"33"|"0.275"  
"31712"|"Singulair 4 MG Oral Tablet Chewable"|"64190"|"Exercise-induced Asthma"|"2"|"1"  
"31712"|"Singulair 4 MG Oral Tablet Chewable"|"297031"|"Intermittent Asthma"|"2"|"0.666667"  
"31754"|"Protonix 40 MG Oral Tablet Delayed Release"|"64688"|"Esophageal Reflux"|"9"|"0.236842"  
"97447"|"Benzoyl Peroxide 5 % LIQD"|"69606"|"Acne"|"4"|"0.666667"  
"97447"|"Benzoyl Peroxide 5 % LIQD"|"69607"|"Acne Vulgaris"|"2"|"0.666667"  
"97450"|"Cobal-1000 1000 MCG/ML SOLN"|"257948"|"Vitamin B12 Deficiency"|"2"|"1"  
"97473"|"Iron 325 (65 Fe) MG Oral Tablet"|"66444"|"Pregnancy Complicated By Anemia"|"2"|"1"  
"97473"|"Iron 325 (65 Fe) MG Oral Tablet"|"77962"|"Anemia"|"21"|"0.456522"  
"97473"|"Iron 325 (65 Fe) MG Oral Tablet"|"77968"|"Iron Deficiency"|"6"|"0.545455"  
"97520"|"Testosterone Cypionate 100 MG/ML Intramuscular Oil"|"69214"|"Hypopituitarism"|"2"|"1"  
"97542"|"BusPIRone HCl 10 MG Oral Tablet"|"61118"|"Anxiety (Symptom)"|"10"|"0.588235"  
"97542"|"BusPIRone HCl 10 MG Oral Tablet"|"74537"|"Common Migraine (Without Aura)"|"2"|"0.666667"  
"97542"|"BusPIRone HCl 10 MG Oral Tablet"|"75930"|"Mood Disorder Of Unknown (Axis III) Etiology"|"2"|"1"  
"97542"|"BusPIRone HCl 10 MG Oral Tablet"|"76343"|"Bipolar I Disorder, Most Recent Episode, Depressed - Moderate"|"2"|"1"  
"97542"|"BusPIRone HCl 10 MG Oral Tablet"|"76351"|"Depression"|"5"|"0.277778"  
"97542"|"BusPIRone HCl 10 MG Oral Tablet"|"76388"|"Bipolar Disorder NOS"|"3"|"0.75"  
"97542"|"BusPIRone HCl 10 MG Oral Tablet"|"76536"|"Generalized Anxiety Disorder"|"9"|"0.692308"  
"97542"|"BusPIRone HCl 10 MG Oral Tablet"|"76537"|"Panic Disorder Without Agoraphobia"|"5"|"0.555556"  
"97542"|"BusPIRone HCl 10 MG Oral Tablet"|"76587"|"Anxiety Disorder NOS"|"3"|"0.5"  
"97542"|"BusPIRone HCl 10 MG Oral Tablet"|"275592"|"Post-traumatic Stress Disorder"|"2"|"0.666667"  
"97543"|"BusPIRone HCl 5 MG Oral Tablet"|"60828"|"Headache"|"13"|"0.722222"  
"97543"|"BusPIRone HCl 5 MG Oral Tablet"|"61070"|"Tingling (Paresthesia)"|"2"|"0.666667"  
"97543"|"BusPIRone HCl 5 MG Oral Tablet"|"61118"|"Anxiety (Symptom)"|"9"|"0.45"  
"97543"|"BusPIRone HCl 5 MG Oral Tablet"|"74530"|"Tension-type Headache"|"5"|"0.625"  
"97543"|"BusPIRone HCl 5 MG Oral Tablet"|"74537"|"Common Migraine (Without Aura)"|"2"|"0.5"  
"97543"|"BusPIRone HCl 5 MG Oral Tablet"|"76306"|"Episodic Mood Disorders"|"2"|"1"  
"97543"|"BusPIRone HCl 5 MG Oral Tablet"|"76357"|"Major Depression, Recurrent"|"2"|"0.5"  
"97543"|"BusPIRone HCl 5 MG Oral Tablet"|"76361"|"Moderate Recurrent Major Depression"|"3"|"0.6"  
"97543"|"BusPIRone HCl 5 MG Oral Tablet"|"76536"|"Generalized Anxiety Disorder"|"4"|"0.444444"  
"97543"|"BusPIRone HCl 5 MG Oral Tablet"|"76537"|"Panic Disorder Without Agoraphobia"|"3"|"0.428571"  
"97543"|"BusPIRone HCl 5 MG Oral Tablet"|"76587"|"Anxiety Disorder NOS"|"3"|"0.375"

"97543"|"BusPIRone HCl 5 MG Oral Tablet"|"76680"|"Adjustment Disorder With Anxiety"|"4"|"0.5"  
"97543"|"BusPIRone HCl 5 MG Oral Tablet"|"196089"|"Adjustment Disorder With Anxiety And Depressed  
Mood"|"2"|"1"  
"97543"|"BusPIRone HCl 5 MG Oral Tablet"|"251600"|"Dementia"|"2"|"0.333333"  
"97544"|"Butorphanol Tartrate 10 MG/ML Nasal Solution"|"74533"|"Migraine Headache"|"2"|"0.4"  
"97545"|"Calcitriol 0.25 MCG Oral Capsule"|"65645"|"Renal Osteodystrophy"|"5"|"0.416667"  
"97545"|"Calcitriol 0.25 MCG Oral Capsule"|"65655"|"Renal Tubular Acidosis"|"2"|"0.666667"  
"97545"|"Calcitriol 0.25 MCG Oral Capsule"|"68107"|"Hypocalcemia"|"3"|"0.333333"  
"97545"|"Calcitriol 0.25 MCG Oral Capsule"|"69341"|"Osteoporosis"|"2"|"0.4"  
"97545"|"Calcitriol 0.25 MCG Oral Capsule"|"69353"|"Secondary Hyperparathyroidism"|"10"|"0.909091"  
"97545"|"Calcitriol 0.25 MCG Oral Capsule"|"69362"|"Hypoparathyroidism"|"2"|"0.25"  
"97545"|"Calcitriol 0.25 MCG Oral Capsule"|"69366"|"Pseudo Hypoparathyroidism"|"2"|"1"  
"97545"|"Calcitriol 0.25 MCG Oral Capsule"|"258937"|"Renal Secondary Hyperparathyroidism"|"7"|"0.466667"  
"97545"|"Calcitriol 0.25 MCG Oral Capsule"|"274639"|"Chronic Kidney Disease (NKF Classification)"|"2"|"0.2"  
"97545"|"Calcitriol 0.25 MCG Oral Capsule"|"274671"|"Chronic Kidney Disease, Stage"|"2"|"1"  
"97545"|"Calcitriol 0.25 MCG Oral Capsule"|"274672"|"Chronic Kidney Disease, Stage 4"|"3"|"0.1875"  
"97546"|"Calcitriol 0.5 MCG Oral Capsule"|"28146"|"Chronic Renal Failure"|"2"|"0.285714"  
"97546"|"Calcitriol 0.5 MCG Oral Capsule"|"68093"|"Hypophosphatemic Rickets"|"2"|"1"  
"97546"|"Calcitriol 0.5 MCG Oral Capsule"|"68107"|"Hypocalcemia"|"3"|"0.6"  
"97546"|"Calcitriol 0.5 MCG Oral Capsule"|"69353"|"Secondary Hyperparathyroidism"|"3"|"1"  
"97546"|"Calcitriol 0.5 MCG Oral Capsule"|"69362"|"Hypoparathyroidism"|"2"|"0.4"  
"97546"|"Calcitriol 0.5 MCG Oral Capsule"|"69366"|"Pseudo Hypoparathyroidism"|"2"|"1"  
"97546"|"Calcitriol 0.5 MCG Oral Capsule"|"258937"|"Renal Secondary Hyperparathyroidism"|"3"|"0.428571"  
"97546"|"Calcitriol 0.5 MCG Oral Capsule"|"274672"|"Chronic Kidney Disease, Stage 4"|"3"|"0.428571"  
"97547"|"Cefadroxil 500 MG Oral Capsule"|"34444"|"Mucosal Cyst"|"2"|"1"  
"97547"|"Cefadroxil 500 MG Oral Capsule"|"62585"|"Chronic Sinusitis"|"4"|"0.25"  
"97547"|"Cefadroxil 500 MG Oral Capsule"|"62586"|"Chronic Maxillary Sinusitis"|"43"|"0.383929"  
"97547"|"Cefadroxil 500 MG Oral Capsule"|"62587"|"Chronic Frontal Sinusitis"|"17"|"0.220779"  
"97547"|"Cefadroxil 500 MG Oral Capsule"|"62588"|"Chronic Ethmoidal Sinusitis"|"62"|"0.584906"  
"97547"|"Cefadroxil 500 MG Oral Capsule"|"62589"|"Chronic Sphenoidal Sinusitis"|"5"|"0.192308"  
"97547"|"Cefadroxil 500 MG Oral Capsule"|"62590"|"Chronic Pansinusitis"|"2"|"0.285714"  
"97547"|"Cefadroxil 500 MG Oral Capsule"|"62592"|"Inverted Nasal Papilloma"|"4"|"0.571429"  
"97547"|"Cefadroxil 500 MG Oral Capsule"|"62614"|"Deviated Nasal Septum (Acquired)"|"13"|"0.245283"  
"97547"|"Cefadroxil 500 MG Oral Capsule"|"62616"|"Epistaxis"|"2"|"0.25"  
"97547"|"Cefadroxil 500 MG Oral Capsule"|"69236"|"Graves' Ophthalmopathy"|"2"|"1"  
"97547"|"Cefadroxil 500 MG Oral Capsule"|"69660"|"Chronic Cutaneous Ulcer"|"7"|"0.538462"  
"97547"|"Cefadroxil 500 MG Oral Capsule"|"74585"|"Cerebrospinal Fluid Rhinorrhea"|"4"|"0.666667"  
"97547"|"Cefadroxil 500 MG Oral Capsule"|"74963"|"Hereditary Hemorrhagic Telangiectasia (Osler-Rendu-  
Weber)"|"2"|"1"  
"97547"|"Cefadroxil 500 MG Oral Capsule"|"78365"|"Nasal Cavity Neoplasm"|"2"|"0.4"  
"97547"|"Cefadroxil 500 MG Oral Capsule"|"78367"|"Malignant Nasal Cavity Neoplasm"|"2"|"0.666667"  
"97547"|"Cefadroxil 500 MG Oral Capsule"|"78371"|"Benign Nasal Cavity Neoplasm"|"2"|"0.5"  
"97547"|"Cefadroxil 500 MG Oral Capsule"|"169023"|"Fracture Of The Nasal Bones"|"2"|"1"  
"97547"|"Cefadroxil 500 MG Oral Capsule"|"258020"|"Infected Superficial Injury Of Fingers"|"5"|"1"  
"97551"|"Cephalexin 250 MG Oral Capsule"|"65762"|"Urinary Tract Infection"|"5"|"0.454545"  
"97551"|"Cephalexin 250 MG Oral Capsule"|"69999"|"Cellulitis"|"9"|"0.5625"  
"97551"|"Cephalexin 250 MG Oral Capsule"|"70027"|"Folliculitis"|"3"|"1"  
"97551"|"Cephalexin 250 MG Oral Capsule"|"88375"|"Skin: A Rash"|"2"|"0.4"  
"97552"|"Cephalexin 500 MG Oral Capsule"|"65753"|"Acute Cystitis"|"2"|"0.25"  
"97552"|"Cephalexin 500 MG Oral Capsule"|"65762"|"Urinary Tract Infection"|"57"|"0.626374"  
"97552"|"Cephalexin 500 MG Oral Capsule"|"65764"|"Urinary Tract Infection, Geriatric Presentation"|"8"|"0.727273"  
"97552"|"Cephalexin 500 MG Oral Capsule"|"65988"|"Breast Atrophy"|"2"|"1"  
"97552"|"Cephalexin 500 MG Oral Capsule"|"67343"|"Obstetrical Surgical Wound Complications - Postpartum  
Condition Or Complication"|"2"|"0.666667"

"97552"|"Cephalexin 500 MG Oral Capsule"|"67695"|"Cystic Fibrosis"|"2"|"0.2"  
"97552"|"Cephalexin 500 MG Oral Capsule"|"69834"|"Ingrowing Nail With Infection"|"2"|"0.5"  
"97552"|"Cephalexin 500 MG Oral Capsule"|"69920"|"Sebaceous Cyst"|"2"|"0.4"  
"97552"|"Cephalexin 500 MG Oral Capsule"|"69968"|"Carbuncle"|"2"|"1"  
"97552"|"Cephalexin 500 MG Oral Capsule"|"69999"|"Cellulitis"|"14"|"0.518519"  
"97552"|"Cephalexin 500 MG Oral Capsule"|"70016"|"Cellulitis Of The Leg"|"5"|"0.833333"  
"97552"|"Cephalexin 500 MG Oral Capsule"|"70027"|"Folliculitis"|"6"|"0.333333"  
"97552"|"Cephalexin 500 MG Oral Capsule"|"70060"|"Impetigo"|"2"|"0.666667"  
"97552"|"Cephalexin 500 MG Oral Capsule"|"70061"|"Paronychia"|"2"|"0.4"  
"97552"|"Cephalexin 500 MG Oral Capsule"|"70063"|"Paronychia Of The Toe(S)"|"3"|"0.75"  
"97552"|"Cephalexin 500 MG Oral Capsule"|"73600"|"Olecranon Bursitis"|"2"|"0.666667"  
"97552"|"Cephalexin 500 MG Oral Capsule"|"73993"|"Acquired Deformity Of Nose"|"2"|"1"  
"97552"|"Cephalexin 500 MG Oral Capsule"|"77174"|"Wound Infection"|"2"|"0.666667"  
"97552"|"Cephalexin 500 MG Oral Capsule"|"79752"|"Benign Skin Neoplasm"|"2"|"0.666667"  
"97552"|"Cephalexin 500 MG Oral Capsule"|"81322"|"Abrasion Of The Foot"|"2"|"0.666667"  
"97552"|"Cephalexin 500 MG Oral Capsule"|"81584"|"Burns"|"2"|"0.666667"  
"97552"|"Cephalexin 500 MG Oral Capsule"|"155099"|"Lower Leg Localized Swelling"|"2"|"0.25"  
"97552"|"Cephalexin 500 MG Oral Capsule"|"182913"|"Infection Of An Abdominal Incision"|"2"|"1"  
"97552"|"Cephalexin 500 MG Oral Capsule"|"196605"|"Rapid Bacterial Antigen Ident Kit Streptococcus Group B"|"2"|"1"  
"97552"|"Cephalexin 500 MG Oral Capsule"|"251467"|"Limb Pain"|"4"|"0.25"  
"97552"|"Cephalexin 500 MG Oral Capsule"|"274711"|"End Stage Renal Disease"|"2"|"0.5"  
"97552"|"Cephalexin 500 MG Oral Capsule"|"282676"|"Lymphadenopathy"|"2"|"0.333333"  
"97553"|"Clindamycin HCl 300 MG Oral Capsule"|"60844"|"Tooth Pain"|"4"|"0.5"  
"97553"|"Clindamycin HCl 300 MG Oral Capsule"|"62586"|"Chronic Maxillary Sinusitis"|"4"|"0.173913"  
"97553"|"Clindamycin HCl 300 MG Oral Capsule"|"62587"|"Chronic Frontal Sinusitis"|"3"|"0.176471"  
"97553"|"Clindamycin HCl 300 MG Oral Capsule"|"62588"|"Chronic Ethmoidal Sinusitis"|"5"|"0.263158"  
"97553"|"Clindamycin HCl 300 MG Oral Capsule"|"62590"|"Chronic Pansinusitis"|"2"|"0.666667"  
"97553"|"Clindamycin HCl 300 MG Oral Capsule"|"62641"|"Parotitis"|"3"|"0.6"  
"97553"|"Clindamycin HCl 300 MG Oral Capsule"|"69402"|"Diabetes Mellitus Poorly Controlled"|"3"|"0.136364"  
"97553"|"Clindamycin HCl 300 MG Oral Capsule"|"69785"|"Hidradenitis Suppurativa"|"2"|"0.333333"  
"97553"|"Clindamycin HCl 300 MG Oral Capsule"|"69999"|"Cellulitis"|"22"|"0.564103"  
"97553"|"Clindamycin HCl 300 MG Oral Capsule"|"70006"|"Cellulitis Of The Arm"|"2"|"1"  
"97553"|"Clindamycin HCl 300 MG Oral Capsule"|"70016"|"Cellulitis Of The Leg"|"6"|"0.6"  
"97553"|"Clindamycin HCl 300 MG Oral Capsule"|"70018"|"Cellulitis Of The Foot"|"2"|"0.4"  
"97553"|"Clindamycin HCl 300 MG Oral Capsule"|"70027"|"Folliculitis"|"8"|"0.5"  
"97553"|"Clindamycin HCl 300 MG Oral Capsule"|"70029"|"Furuncle"|"3"|"0.5"  
"97553"|"Clindamycin HCl 300 MG Oral Capsule"|"70034"|"Furuncle On The Neck"|"2"|"1"  
"97553"|"Clindamycin HCl 300 MG Oral Capsule"|"70035"|"Furuncle In The Axilla"|"2"|"0.666667"  
"97553"|"Clindamycin HCl 300 MG Oral Capsule"|"70060"|"Impetigo"|"3"|"0.5"  
"97553"|"Clindamycin HCl 300 MG Oral Capsule"|"70080"|"Skin Abscess"|"5"|"0.5"  
"97553"|"Clindamycin HCl 300 MG Oral Capsule"|"70081"|"Skin Abscess Of The Face"|"2"|"0.666667"  
"97553"|"Clindamycin HCl 300 MG Oral Capsule"|"70094"|"Skin Abscess Of The Buttocks"|"2"|"0.666667"  
"97553"|"Clindamycin HCl 300 MG Oral Capsule"|"71075"|"Fracture Of Facial Bones"|"2"|"1"  
"97553"|"Clindamycin HCl 300 MG Oral Capsule"|"74963"|"Hereditary Hemorrhagic Telangiectasia (Osler-Rendu-Weber)"|"2"|"1"  
"97553"|"Clindamycin HCl 300 MG Oral Capsule"|"77174"|"Wound Infection"|"2"|"0.666667"  
"97553"|"Clindamycin HCl 300 MG Oral Capsule"|"82407"|"Gunshot Wound Of The Face"|"2"|"0.666667"  
"97553"|"Clindamycin HCl 300 MG Oral Capsule"|"168612"|"Cellulitis Of The Right Leg"|"4"|"0.8"  
"97553"|"Clindamycin HCl 300 MG Oral Capsule"|"278472"|"Pustular Folliculitis"|"3"|"0.75"  
"97553"|"Clindamycin HCl 300 MG Oral Capsule"|"278474"|"Furuncle In The Right Axilla"|"3"|"1"  
"97553"|"Clindamycin HCl 300 MG Oral Capsule"|"278634"|"Skin Abscess Of The Right Buttock"|"2"|"0.666667"  
"97553"|"Clindamycin HCl 300 MG Oral Capsule"|"288522"|"Periodontal Abscess"|"2"|"0.5"  
"97553"|"Clindamycin HCl 300 MG Oral Capsule"|"288790"|"Bacterial Vaginosis"|"10"|"0.37037"

"97554"|"Clindamycin Phosphate 1 % External Gel"|"69606"|"Acne"|"7"|"0.388889"  
"97555"|"Doxazosin Mesylate 1 MG Oral Tablet"|"63467"|"Hypertension"|"12"|"0.387097"  
"97555"|"Doxazosin Mesylate 1 MG Oral Tablet"|"63468"|"Essential Hypertension"|"3"|"0.333333"  
"97555"|"Doxazosin Mesylate 1 MG Oral Tablet"|"289131"|"Benign Prostatic Hypertrophy"|"2"|"0.25"  
"97556"|"Doxazosin Mesylate 2 MG Oral Tablet"|"62975"|"Coronary Artery Disease"|"4"|"0.153846"  
"97556"|"Doxazosin Mesylate 2 MG Oral Tablet"|"63467"|"Hypertension"|"20"|"0.31746"  
"97556"|"Doxazosin Mesylate 2 MG Oral Tablet"|"63468"|"Essential Hypertension"|"10"|"0.384615"  
"97556"|"Doxazosin Mesylate 2 MG Oral Tablet"|"63470"|"Benign Essential Hypertension"|"12"|"0.48"  
"97556"|"Doxazosin Mesylate 2 MG Oral Tablet"|"289130"|"Benign Prostatic Hypertrophy With Urinary  
Obstruction"|"2"|"1"  
"97556"|"Doxazosin Mesylate 2 MG Oral Tablet"|"289131"|"Benign Prostatic Hypertrophy"|"4"|"0.444444"  
"97557"|"Doxazosin Mesylate 4 MG Oral Tablet"|"62975"|"Coronary Artery Disease"|"6"|"0.176471"  
"97557"|"Doxazosin Mesylate 4 MG Oral Tablet"|"63467"|"Hypertension"|"28"|"0.35443"  
"97557"|"Doxazosin Mesylate 4 MG Oral Tablet"|"63468"|"Essential Hypertension"|"18"|"0.409091"  
"97557"|"Doxazosin Mesylate 4 MG Oral Tablet"|"63470"|"Benign Essential Hypertension"|"16"|"0.516129"  
"97557"|"Doxazosin Mesylate 4 MG Oral Tablet"|"289131"|"Benign Prostatic Hypertrophy"|"6"|"0.315789"  
"97558"|"Doxazosin Mesylate 8 MG Oral Tablet"|"63467"|"Hypertension"|"7"|"0.21875"  
"97558"|"Doxazosin Mesylate 8 MG Oral Tablet"|"63468"|"Essential Hypertension"|"8"|"0.4"  
"97558"|"Doxazosin Mesylate 8 MG Oral Tablet"|"63470"|"Benign Essential Hypertension"|"8"|"0.571429"  
"97559"|"Doxycycline Monohydrate 100 MG Oral Capsule"|"60928"|"Pain During Urination (Dysuria)"|"3"|"1"  
"97559"|"Doxycycline Monohydrate 100 MG Oral Capsule"|"65847"|"Urethritis"|"2"|"0.666667"  
"97559"|"Doxycycline Monohydrate 100 MG Oral Capsule"|"69606"|"Acne"|"2"|"0.4"  
"97559"|"Doxycycline Monohydrate 100 MG Oral Capsule"|"296447"|"Preventive Medicine Counseling About  
Travel"|"2"|"0.666667"  
"97561"|"Enalapril Maleate 10 MG Oral Tablet"|"63467"|"Hypertension"|"45"|"0.387931"  
"97561"|"Enalapril Maleate 10 MG Oral Tablet"|"63468"|"Essential Hypertension"|"20"|"0.444444"  
"97561"|"Enalapril Maleate 10 MG Oral Tablet"|"63470"|"Benign Essential Hypertension"|"23"|"0.45098"  
"97562"|"Enalapril Maleate 2.5 MG Oral Tablet"|"63467"|"Hypertension"|"4"|"0.153846"  
"97562"|"Enalapril Maleate 2.5 MG Oral Tablet"|"63468"|"Essential Hypertension"|"5"|"0.416667"  
"97562"|"Enalapril Maleate 2.5 MG Oral Tablet"|"63470"|"Benign Essential Hypertension"|"5"|"0.625"  
"97562"|"Enalapril Maleate 2.5 MG Oral Tablet"|"63490"|"Congenital Heart Disease"|"2"|"1"  
"97562"|"Enalapril Maleate 2.5 MG Oral Tablet"|"69380"|"Diabetes Mellitus"|"6"|"0.24"  
"97562"|"Enalapril Maleate 2.5 MG Oral Tablet"|"282327"|"Prehypertension"|"2"|"1"  
"97563"|"Enalapril Maleate 20 MG Oral Tablet"|"62975"|"Coronary Artery Disease"|"5"|"0.125"  
"97563"|"Enalapril Maleate 20 MG Oral Tablet"|"63217"|"Congestive Heart Failure"|"3"|"0.130435"  
"97563"|"Enalapril Maleate 20 MG Oral Tablet"|"63467"|"Hypertension"|"59"|"0.395973"  
"97563"|"Enalapril Maleate 20 MG Oral Tablet"|"63468"|"Essential Hypertension"|"28"|"0.405797"  
"97563"|"Enalapril Maleate 20 MG Oral Tablet"|"63470"|"Benign Essential Hypertension"|"33"|"0.492537"  
"97563"|"Enalapril Maleate 20 MG Oral Tablet"|"63472"|"Malignant Essential Hypertension"|"2"|"0.5"  
"97564"|"Enalapril Maleate 5 MG Oral Tablet"|"34588"|"Proteinuria"|"2"|"0.4"  
"97564"|"Enalapril Maleate 5 MG Oral Tablet"|"62975"|"Coronary Artery Disease"|"3"|"0.142857"  
"97564"|"Enalapril Maleate 5 MG Oral Tablet"|"63467"|"Hypertension"|"23"|"0.291139"  
"97564"|"Enalapril Maleate 5 MG Oral Tablet"|"63468"|"Essential Hypertension"|"16"|"0.470588"  
"97564"|"Enalapril Maleate 5 MG Oral Tablet"|"63470"|"Benign Essential Hypertension"|"17"|"0.548387"  
"97565"|"Enalapril-Hydrochlorothiazide 10-25 MG Oral Tablet"|"63467"|"Hypertension"|"10"|"0.526316"  
"97565"|"Enalapril-Hydrochlorothiazide 10-25 MG Oral Tablet"|"63468"|"Essential Hypertension"|"5"|"0.555556"  
"97565"|"Enalapril-Hydrochlorothiazide 10-25 MG Oral Tablet"|"63470"|"Benign Essential Hypertension"|"3"|"0.375"  
"97567"|"Etoposide 50 MG Oral Capsule"|"181267"|"Carcinoma Of The Prostate Gland"|"2"|"1"  
"97567"|"Etoposide 50 MG Oral Capsule"|"278812"|"Prostate Cancer"|"9"|"0.9"  
"97569"|"Famotidine 40 MG Oral Tablet"|"60899"|"Abdominal Pain"|"2"|"0.25"  
"97569"|"Famotidine 40 MG Oral Tablet"|"64680"|"Chronic Reflux Esophagitis"|"2"|"0.5"  
"97569"|"Famotidine 40 MG Oral Tablet"|"64688"|"Esophageal Reflux"|"10"|"0.47619"  
"97570"|"FLUoxetine HCl 10 MG Oral Capsule"|"61118"|"Anxiety (Symptom)"|"5"|"0.714286"  
"97570"|"FLUoxetine HCl 10 MG Oral Capsule"|"76307"|"Bipolar Disorder"|"2"|"0.333333"

"97570"|"FLUoxetine HCl 10 MG Oral Capsule"|"76351"|"Depression"|"9"|"0.36"  
"97570"|"FLUoxetine HCl 10 MG Oral Capsule"|"76357"|"Major Depression, Recurrent"|"7"|"1"  
"97570"|"FLUoxetine HCl 10 MG Oral Capsule"|"76361"|"Moderate Recurrent Major Depression"|"4"|"0.5"  
"97570"|"FLUoxetine HCl 10 MG Oral Capsule"|"76391"|"Premenstrual Disorder"|"2"|"0.4"  
"97570"|"FLUoxetine HCl 10 MG Oral Capsule"|"76538"|"Panic Disorder With Agoraphobia"|"2"|"1"  
"97570"|"FLUoxetine HCl 10 MG Oral Capsule"|"76546"|"Obsessive Compulsive Disorder"|"2"|"1"  
"97570"|"FLUoxetine HCl 10 MG Oral Capsule"|"288796"|"Premenstrual Syndromes"|"2"|"1"  
"97571"|"FLUoxetine HCl 20 MG Oral Capsule"|"61118"|"Anxiety (Symptom)"|"7"|"0.4375"  
"97571"|"FLUoxetine HCl 20 MG Oral Capsule"|"75125"|"Multiple Sclerosis"|"4"|"0.307692"  
"97571"|"FLUoxetine HCl 20 MG Oral Capsule"|"75929"|"Mood Disorder Due To General Medical Condition"|"2"|"1"  
"97571"|"FLUoxetine HCl 20 MG Oral Capsule"|"76306"|"Episodic Mood Disorders"|"2"|"1"  
"97571"|"FLUoxetine HCl 20 MG Oral Capsule"|"76307"|"Bipolar Disorder"|"3"|"0.428571"  
"97571"|"FLUoxetine HCl 20 MG Oral Capsule"|"76351"|"Depression"|"55"|"0.625"  
"97571"|"FLUoxetine HCl 20 MG Oral Capsule"|"76357"|"Major Depression, Recurrent"|"10"|"0.714286"  
"97571"|"FLUoxetine HCl 20 MG Oral Capsule"|"76361"|"Moderate Recurrent Major Depression"|"4"|"0.8"  
"97571"|"FLUoxetine HCl 20 MG Oral Capsule"|"76388"|"Bipolar Disorder NOS"|"4"|"0.5"  
"97571"|"FLUoxetine HCl 20 MG Oral Capsule"|"76546"|"Obsessive Compulsive Disorder"|"5"|"0.714286"  
"97571"|"FLUoxetine HCl 20 MG Oral Capsule"|"275592"|"Post-traumatic Stress Disorder"|"2"|"0.333333"  
"97571"|"FLUoxetine HCl 20 MG Oral Capsule"|"275604"|"Depression With Anxiety"|"4"|"1"  
"97573"|"FluvoxaMINE Maleate 100 MG Oral Tablet"|"76536"|"Generalized Anxiety Disorder"|"2"|"1"  
"97573"|"FluvoxaMINE Maleate 100 MG Oral Tablet"|"76546"|"Obsessive Compulsive Disorder"|"5"|"0.833333"  
"97574"|"FluvoxaMINE Maleate 50 MG Oral Tablet"|"76546"|"Obsessive Compulsive Disorder"|"4"|"0.8"  
"97578"|"Ketoconazole 2 % External Cream"|"61029"|"Itching (Pruritus)"|"2"|"0.333333"  
"97578"|"Ketoconazole 2 % External Cream"|"65134"|"Internal Hemorrhoids"|"2"|"1"  
"97578"|"Ketoconazole 2 % External Cream"|"70115"|"Dermatophytosis"|"3"|"0.25"  
"97578"|"Ketoconazole 2 % External Cream"|"70116"|"Tinea Capitis"|"6"|"0.4"  
"97578"|"Ketoconazole 2 % External Cream"|"70121"|"Tinea Cruris"|"8"|"0.470588"  
"97578"|"Ketoconazole 2 % External Cream"|"70122"|"Tinea Pedis"|"17"|"0.772727"  
"97578"|"Ketoconazole 2 % External Cream"|"70124"|"Tinea Corporis"|"38"|"0.730769"  
"97578"|"Ketoconazole 2 % External Cream"|"70126"|"Tinea Versicolor"|"15"|"0.882353"  
"97578"|"Ketoconazole 2 % External Cream"|"76835"|"HIV Infection"|"3"|"0.2"  
"97578"|"Ketoconazole 2 % External Cream"|"77211"|"Vaginal Candidiasis"|"3"|"0.428571"  
"97578"|"Ketoconazole 2 % External Cream"|"88375"|"Skin: A Rash"|"10"|"0.714286"  
"97578"|"Ketoconazole 2 % External Cream"|"168628"|"Tinea Facialis"|"2"|"0.666667"  
"97578"|"Ketoconazole 2 % External Cream"|"168632"|"Tinea Cruris Of The Groin"|"5"|"0.454545"  
"97578"|"Ketoconazole 2 % External Cream"|"168633"|"Tinea Cruris Of The Perianal Area"|"2"|"0.5"  
"97578"|"Ketoconazole 2 % External Cream"|"173522"|"Candidal Intertrigo"|"8"|"0.666667"  
"97578"|"Ketoconazole 2 % External Cream"|"283255"|"Balanitis"|"3"|"0.6"  
"97579"|"Levothyroxine Sodium 137 MCG Oral Tablet"|"69214"|"Hypopituitarism"|"3"|"0.5"  
"97579"|"Levothyroxine Sodium 137 MCG Oral Tablet"|"69258"|"Hypothyroidism"|"51"|"0.689189"  
"97579"|"Levothyroxine Sodium 137 MCG Oral Tablet"|"69260"|"Hypothyroidism Postablative"|"3"|"1"  
"97579"|"Levothyroxine Sodium 137 MCG Oral Tablet"|"69262"|"Post Radio-iodine Therapy Hypothyroidism"|"4"|"0.8"  
"97579"|"Levothyroxine Sodium 137 MCG Oral Tablet"|"69266"|"Congenital Hypothyroidism"|"3"|"0.75"  
"97580"|"Lovastatin 10 MG Oral Tablet"|"63467"|"Hypertension"|"3"|"0.214286"  
"97580"|"Lovastatin 10 MG Oral Tablet"|"67970"|"Hyperlipidemia"|"7"|"0.411765"  
"97581"|"Lovastatin 20 MG Oral Tablet"|"67970"|"Hyperlipidemia"|"28"|"0.491228"  
"97581"|"Lovastatin 20 MG Oral Tablet"|"283291"|"Hypercholesterolemia"|"2"|"0.5"  
"97581"|"Lovastatin 20 MG Oral Tablet"|"283292"|"Essential Hypercholesterolemia"|"4"|"0.5"  
"97581"|"Lovastatin 20 MG Oral Tablet"|"291485"|"Dyslipidemia"|"3"|"0.3"  
"97582"|"Lovastatin 40 MG Oral Tablet"|"67970"|"Hyperlipidemia"|"22"|"0.4"  
"97582"|"Lovastatin 40 MG Oral Tablet"|"291485"|"Dyslipidemia"|"5"|"0.625"  
"97583"|"Megestrol Acetate 40 MG/ML Oral Suspension"|"76442"|"Failure To Thrive In Childhood"|"7"|"0.636364"  
"97583"|"Megestrol Acetate 40 MG/ML Oral Suspension"|"97576"|"Failure To Gain Weight"|"2"|"1"

"97583"|"Megestrol Acetate 40 MG/ML Oral Suspension"|"283277"|"Abnormal Weight Loss"|"2"|"0.4"  
"97591"|"Nabumetone 500 MG Oral Tablet"|"70455"|"Rheumatoid Arthritis"|"7"|"0.777778"  
"97591"|"Nabumetone 500 MG Oral Tablet"|"85614"|"Joint Pain, Localized In The Hip"|"2"|"0.5"  
"97591"|"Nabumetone 500 MG Oral Tablet"|"278685"|"Arthralgias In Multiple Sites"|"2"|"1"  
"97592"|"Nabumetone 750 MG Oral Tablet"|"70221"|"Osteoarthritis Of Multiple Sites"|"2"|"1"  
"97592"|"Nabumetone 750 MG Oral Tablet"|"70455"|"Rheumatoid Arthritis"|"2"|"0.4"  
"97592"|"Nabumetone 750 MG Oral Tablet"|"288977"|"Fibromyalgia"|"2"|"1"  
"97593"|"Nicotine Polacrilex 2 MG Mouth/Throat Gum"|"76090"|"Nicotine Dependence"|"2"|"0.5"  
"97598"|"Oxaprozin 600 MG Oral Tablet"|"70455"|"Rheumatoid Arthritis"|"3"|"1"  
"97605"|"Primidone 50 MG Oral Tablet"|"74988"|"Seizure Disorder"|"2"|"0.4"  
"97605"|"Primidone 50 MG Oral Tablet"|"75104"|"Familial (Benign Essential) Tremor"|"14"|"0.583333"  
"97605"|"Primidone 50 MG Oral Tablet"|"75106"|"Drug-induced Essential Tremor"|"2"|"0.666667"  
"97605"|"Primidone 50 MG Oral Tablet"|"165548"|"Tremor"|"6"|"0.5"  
"97608"|"Propafenone HCl 150 MG Oral Tablet"|"62916"|"Atrial Fibrillation"|"4"|"0.444444"  
"97609"|"Propafenone HCl 225 MG Oral Tablet"|"62916"|"Atrial Fibrillation"|"2"|"0.222222"  
"97610"|"Propafenone HCl 300 MG Oral Tablet"|"62914"|"Atrial Flutter"|"2"|"0.666667"  
"97610"|"Propafenone HCl 300 MG Oral Tablet"|"62916"|"Atrial Fibrillation"|"4"|"0.5"  
"97612"|"Sotalol HCl 160 MG Oral Tablet"|"62916"|"Atrial Fibrillation"|"2"|"0.666667"  
"97614"|"Sotalol HCl 80 MG Oral Tablet"|"62916"|"Atrial Fibrillation"|"9"|"0.45"  
"97614"|"Sotalol HCl 80 MG Oral Tablet"|"63217"|"Congestive Heart Failure"|"2"|"0.222222"  
"97614"|"Sotalol HCl 80 MG Oral Tablet"|"63468"|"Essential Hypertension"|"3"|"0.214286"  
"97622"|"Valproic Acid 250 MG/5ML Oral Syrup"|"74988"|"Seizure Disorder"|"14"|"0.482759"  
"97622"|"Valproic Acid 250 MG/5ML Oral Syrup"|"75001"|"Partial Complex Psychomotor Seizure"|"2"|"1"  
"97639"|"Acetaminophen-Codeine 120-12 MG/5ML Oral Solution"|"62743"|"Chronic Tonsillitis"|"4"|"0.8"  
"97639"|"Acetaminophen-Codeine 120-12 MG/5ML Oral Solution"|"62745"|"Tonsillar Hypertrophy"|"5"|"0.714286"  
"97639"|"Acetaminophen-Codeine 120-12 MG/5ML Oral Solution"|"78008"|"Sickle Cell Hb-SC Disease"|"3"|"0.5"  
"97639"|"Acetaminophen-Codeine 120-12 MG/5ML Oral Solution"|"78035"|"Sickle Cell Hb-SS Disease"|"8"|"0.727273"  
"97647"|"Motrin 40 MG/ML Oral Suspension"|"77891"|"Acute Upper Respiratory Infection"|"2"|"1"  
"97651"|"Sotalol HCl 120 MG Oral Tablet"|"62947"|"Ventricular Tachycardia"|"3"|"1"  
"97652"|"Enalapril-Hydrochlorothiazide 5-12.5 MG Oral Tablet"|"63467"|"Hypertension"|"10"|"0.714286"  
"97652"|"Enalapril-Hydrochlorothiazide 5-12.5 MG Oral Tablet"|"63468"|"Essential Hypertension"|"2"|"0.5"  
"97652"|"Enalapril-Hydrochlorothiazide 5-12.5 MG Oral Tablet"|"63470"|"Benign Essential Hypertension"|"5"|"0.714286"  
"97661"|"Amoxicillin 500 MG Oral Tablet"|"62322"|"Otitis Externa"|"2"|"1"  
"97661"|"Amoxicillin 500 MG Oral Tablet"|"62343"|"Otitis Media"|"2"|"0.5"  
"97661"|"Amoxicillin 500 MG Oral Tablet"|"62577"|"Sinusitis"|"7"|"0.583333"  
"97661"|"Amoxicillin 500 MG Oral Tablet"|"62578"|"Acute Sinusitis"|"12"|"0.413793"  
"97661"|"Amoxicillin 500 MG Oral Tablet"|"62580"|"Acute Maxillary Sinusitis"|"5"|"0.555556"  
"97661"|"Amoxicillin 500 MG Oral Tablet"|"62582"|"Acute Ethmoidal Sinusitis"|"2"|"1"  
"97661"|"Amoxicillin 500 MG Oral Tablet"|"62588"|"Chronic Ethmoidal Sinusitis"|"2"|"0.666667"  
"97661"|"Amoxicillin 500 MG Oral Tablet"|"62760"|"Acute Pharyngitis"|"20"|"0.740741"  
"97661"|"Amoxicillin 500 MG Oral Tablet"|"64118"|"Acute Bronchitis"|"6"|"0.285714"  
"97661"|"Amoxicillin 500 MG Oral Tablet"|"64764"|"Gastritis Due To H. Pylori"|"2"|"0.666667"  
"97661"|"Amoxicillin 500 MG Oral Tablet"|"65762"|"Urinary Tract Infection"|"27"|"0.586957"  
"97661"|"Amoxicillin 500 MG Oral Tablet"|"74027"|"Osteomyelitis"|"3"|"1"  
"97661"|"Amoxicillin 500 MG Oral Tablet"|"76976"|"Helicobacter Pylori (H. Pylori) Infection"|"4"|"1"  
"97661"|"Amoxicillin 500 MG Oral Tablet"|"77890"|"Upper Respiratory Infection"|"8"|"0.380952"  
"97661"|"Amoxicillin 500 MG Oral Tablet"|"77891"|"Acute Upper Respiratory Infection"|"10"|"0.243902"  
"97661"|"Amoxicillin 500 MG Oral Tablet"|"251528"|"Acute Otitis Media"|"8"|"0.727273"  
"97661"|"Amoxicillin 500 MG Oral Tablet"|"251575"|"Streptococcal Sore Throat"|"2"|"0.4"  
"97661"|"Amoxicillin 500 MG Oral Tablet"|"274516"|"Acute Pharyngitis Streptococcus"|"5"|"1"  
"97661"|"Amoxicillin 500 MG Oral Tablet"|"274533"|"Sore Throat"|"3"|"0.75"  
"97661"|"Amoxicillin 500 MG Oral Tablet"|"274534"|"Acute Sore Throat"|"5"|"0.555556"

"97662"|"FLUoxetine HCl 20 MG Oral Tablet"|"61118"|"Anxiety (Symptom)"|"5"|"0.625"  
"97662"|"FLUoxetine HCl 20 MG Oral Tablet"|"75124"|"Demyelinating Disorders"|"2"|"0.4"  
"97662"|"FLUoxetine HCl 20 MG Oral Tablet"|"75125"|"Multiple Sclerosis"|"7"|"0.388889"  
"97662"|"FLUoxetine HCl 20 MG Oral Tablet"|"76351"|"Depression"|"20"|"0.487805"  
"97662"|"FLUoxetine HCl 20 MG Oral Tablet"|"76357"|"Major Depression, Recurrent"|"3"|"0.6"  
"97662"|"FLUoxetine HCl 20 MG Oral Tablet"|"76364"|"Recurrent Major Depression In Partial  
Remission"|"2"|"0.666667"  
"97662"|"FLUoxetine HCl 20 MG Oral Tablet"|"76388"|"Bipolar Disorder NOS"|"2"|"0.666667"  
"97662"|"FLUoxetine HCl 20 MG Oral Tablet"|"76536"|"Generalized Anxiety Disorder"|"4"|"0.571429"  
"97662"|"FLUoxetine HCl 20 MG Oral Tablet"|"76546"|"Obsessive Compulsive Disorder"|"4"|"0.666667"  
"97663"|"BusPIRone HCl 15 MG Oral Tablet"|"61118"|"Anxiety (Symptom)"|"10"|"0.833333"  
"97663"|"BusPIRone HCl 15 MG Oral Tablet"|"74533"|"Migraine Headache"|"2"|"0.333333"  
"97663"|"BusPIRone HCl 15 MG Oral Tablet"|"74537"|"Common Migraine (Without Aura)"|"2"|"0.4"  
"97663"|"BusPIRone HCl 15 MG Oral Tablet"|"76351"|"Depression"|"4"|"0.25"  
"97663"|"BusPIRone HCl 15 MG Oral Tablet"|"76536"|"Generalized Anxiety Disorder"|"5"|"1"  
"97663"|"BusPIRone HCl 15 MG Oral Tablet"|"76587"|"Anxiety Disorder NOS"|"4"|"0.666667"  
"97669"|"Bisoprolol Fumarate 10 MG Oral Tablet"|"63467"|"Hypertension"|"3"|"0.333333"  
"97669"|"Bisoprolol Fumarate 10 MG Oral Tablet"|"63470"|"Benign Essential Hypertension"|"2"|"1"  
"97670"|"Bisoprolol Fumarate 5 MG Oral Tablet"|"63467"|"Hypertension"|"4"|"0.266667"  
"97670"|"Bisoprolol Fumarate 5 MG Oral Tablet"|"63468"|"Essential Hypertension"|"2"|"0.4"  
"97688"|"Permethrin 1 % External Lotion"|"77704"|"Scabies"|"11"|"0.846154"  
"97693"|"FLUoxetine HCl 40 MG Oral Capsule"|"75125"|"Multiple Sclerosis"|"2"|"0.222222"  
"97693"|"FLUoxetine HCl 40 MG Oral Capsule"|"76351"|"Depression"|"19"|"0.38"  
"97693"|"FLUoxetine HCl 40 MG Oral Capsule"|"76352"|"Major Depression, Single Episode"|"2"|"0.666667"  
"97693"|"FLUoxetine HCl 40 MG Oral Capsule"|"76357"|"Major Depression, Recurrent"|"6"|"0.461538"  
"97693"|"FLUoxetine HCl 40 MG Oral Capsule"|"76361"|"Moderate Recurrent Major Depression"|"5"|"0.714286"  
"97693"|"FLUoxetine HCl 40 MG Oral Capsule"|"76364"|"Recurrent Major Depression In Partial  
Remission"|"2"|"0.666667"  
"97693"|"FLUoxetine HCl 40 MG Oral Capsule"|"76388"|"Bipolar Disorder NOS"|"2"|"0.5"  
"97693"|"FLUoxetine HCl 40 MG Oral Capsule"|"76536"|"Generalized Anxiety Disorder"|"2"|"0.4"  
"97693"|"FLUoxetine HCl 40 MG Oral Capsule"|"76546"|"Obsessive Compulsive Disorder"|"3"|"0.428571"  
"97693"|"FLUoxetine HCl 40 MG Oral Capsule"|"76587"|"Anxiety Disorder NOS"|"3"|"0.428571"  
"97693"|"FLUoxetine HCl 40 MG Oral Capsule"|"76680"|"Adjustment Disorder With Anxiety"|"2"|"0.666667"  
"97693"|"FLUoxetine HCl 40 MG Oral Capsule"|"275604"|"Depression With Anxiety"|"2"|"1"  
"97724"|"Amoxicillin 875 MG Oral Tablet"|"62343"|"Otitis Media"|"2"|"0.666667"  
"97724"|"Amoxicillin 875 MG Oral Tablet"|"62402"|"Otitis Media Of The Right Ear"|"2"|"1"  
"97724"|"Amoxicillin 875 MG Oral Tablet"|"62577"|"Sinusitis"|"9"|"0.529412"  
"97724"|"Amoxicillin 875 MG Oral Tablet"|"62578"|"Acute Sinusitis"|"14"|"0.451613"  
"97724"|"Amoxicillin 875 MG Oral Tablet"|"62580"|"Acute Maxillary Sinusitis"|"6"|"0.461538"  
"97724"|"Amoxicillin 875 MG Oral Tablet"|"62582"|"Acute Ethmoidal Sinusitis"|"2"|"0.666667"  
"97724"|"Amoxicillin 875 MG Oral Tablet"|"62586"|"Chronic Maxillary Sinusitis"|"4"|"0.333333"  
"97724"|"Amoxicillin 875 MG Oral Tablet"|"62733"|"Acute Tonsillitis"|"2"|"0.666667"  
"97724"|"Amoxicillin 875 MG Oral Tablet"|"62760"|"Acute Pharyngitis"|"7"|"0.388889"  
"97724"|"Amoxicillin 875 MG Oral Tablet"|"251528"|"Acute Otitis Media"|"12"|"0.75"  
"97724"|"Amoxicillin 875 MG Oral Tablet"|"251575"|"Streptococcal Sore Throat"|"3"|"0.5"  
"97734"|"FLUoxetine HCl 10 MG Oral Tablet"|"76351"|"Depression"|"8"|"0.571429"  
"97734"|"FLUoxetine HCl 10 MG Oral Tablet"|"76536"|"Generalized Anxiety Disorder"|"3"|"1"  
"97734"|"FLUoxetine HCl 10 MG Oral Tablet"|"76546"|"Obsessive Compulsive Disorder"|"2"|"1"  
"97734"|"FLUoxetine HCl 10 MG Oral Tablet"|"283296"|"Abnormal Weight Gain"|"2"|"0.666667"  
"97755"|"Acetaminophen 160 MG/5ML Oral Liquid"|"77891"|"Acute Upper Respiratory Infection"|"5"|"0.454545"  
"97757"|"BusPIRone HCl 30 MG Oral Tablet"|"76351"|"Depression"|"4"|"0.571429"  
"97790"|"Nicotine 7 MG/24HR Transdermal Patch 24 Hour"|"85752"|"Tobacco Use"|"5"|"0.625"  
"97792"|"Nicotine 14 MG/24HR Transdermal Patch 24 Hour"|"64205"|"Chronic Obstructive Pulmonary  
Disease"|"2"|"0.285714"

"97792"|"Nicotine 14 MG/24HR Transdermal Patch 24 Hour"|"76090"|"Nicotine Dependence"|"4"|"0.571429"  
"97792"|"Nicotine 14 MG/24HR Transdermal Patch 24 Hour"|"85752"|"Tobacco Use"|"7"|"0.466667"  
"97793"|"Nicotine 21 MG/24HR Transdermal Patch 24 Hour"|"76090"|"Nicotine Dependence"|"5"|"0.5"  
"97793"|"Nicotine 21 MG/24HR Transdermal Patch 24 Hour"|"76091"|"Nicotine Dependence - Continuous"|"2"|"1"  
"97793"|"Nicotine 21 MG/24HR Transdermal Patch 24 Hour"|"85752"|"Tobacco Use"|"5"|"0.3125"  
"97814"|"Carbidopa-Levodopa CR 25-100 MG Oral Tablet Extended Release"|"75080"|"Parkinson's Disease"|"19"|"0.791667"  
"97814"|"Carbidopa-Levodopa CR 25-100 MG Oral Tablet Extended Release"|"292509"|"Multisystem Atrophy"|"2"|"1"  
"97828"|"Zyvox 600 MG Oral Tablet"|"77650"|"Atypical Mycobacterial Infection"|"2"|"0.666667"  
"97873"|"Vagifem 25 MCG TABS"|"61011"|"Inadequacy Of Lubrication Of Vaginal Mucosa"|"2"|"0.666667"  
"97873"|"Vagifem 25 MCG TABS"|"66218"|"Postmenopausal Atrophic Vaginitis"|"2"|"0.5"  
"97873"|"Vagifem 25 MCG TABS"|"116888"|"Vaginal Mucosa Atrophy"|"2"|"0.666667"  
"97874"|"Cleocin 100 MG Vaginal Suppository"|"288790"|"Bacterial Vaginosis"|"2"|"0.666667"  
"97880"|"Methylin ER 10 MG TBCR"|"275486"|"ADHD, Combined Type"|"2"|"1"  
"97887"|"Hydrocodone-Acetaminophen 10-325 MG Oral Tablet"|"31947"|"Lumbago"|"4"|"0.285714"  
"97887"|"Hydrocodone-Acetaminophen 10-325 MG Oral Tablet"|"60899"|"Abdominal Pain"|"7"|"0.333333"  
"97887"|"Hydrocodone-Acetaminophen 10-325 MG Oral Tablet"|"70166"|"Localized Primary Osteoarthritis Of The Knee"|"2"|"0.4"  
"97887"|"Hydrocodone-Acetaminophen 10-325 MG Oral Tablet"|"70455"|"Rheumatoid Arthritis"|"4"|"0.181818"  
"97887"|"Hydrocodone-Acetaminophen 10-325 MG Oral Tablet"|"70475"|"Scleroderma"|"4"|"0.8"  
"97887"|"Hydrocodone-Acetaminophen 10-325 MG Oral Tablet"|"71075"|"Fracture Of Facial Bones"|"3"|"0.75"  
"97887"|"Hydrocodone-Acetaminophen 10-325 MG Oral Tablet"|"71119"|"Fracture Of The Vertebral Column"|"2"|"1"  
"97887"|"Hydrocodone-Acetaminophen 10-325 MG Oral Tablet"|"72931"|"Malunion Of Fracture"|"2"|"1"  
"97887"|"Hydrocodone-Acetaminophen 10-325 MG Oral Tablet"|"72932"|"Nonunion Of Fracture"|"2"|"0.5"  
"97887"|"Hydrocodone-Acetaminophen 10-325 MG Oral Tablet"|"73488"|"Acute Medial Meniscus Tear"|"2"|"0.333333"  
"97887"|"Hydrocodone-Acetaminophen 10-325 MG Oral Tablet"|"73666"|"Backache"|"10"|"0.232558"  
"97887"|"Hydrocodone-Acetaminophen 10-325 MG Oral Tablet"|"74011"|"Aseptic Necrosis Of The Femoral Head"|"2"|"1"  
"97887"|"Hydrocodone-Acetaminophen 10-325 MG Oral Tablet"|"76610"|"Chronic Pain Syndrome"|"6"|"0.285714"  
"97887"|"Hydrocodone-Acetaminophen 10-325 MG Oral Tablet"|"78430"|"Malignant Oropharyngeal Neoplasm"|"2"|"1"  
"97887"|"Hydrocodone-Acetaminophen 10-325 MG Oral Tablet"|"78431"|"Malignant Neoplasm Of The Tonsil (Oropharyngeal)"|"2"|"1"  
"97887"|"Hydrocodone-Acetaminophen 10-325 MG Oral Tablet"|"79017"|"Hepatocellular Carcinoma Of The Liver"|"5"|"0.625"  
"97887"|"Hydrocodone-Acetaminophen 10-325 MG Oral Tablet"|"80847"|"Renal Cell Carcinoma"|"5"|"0.625"  
"97887"|"Hydrocodone-Acetaminophen 10-325 MG Oral Tablet"|"81224"|"Malignant Neoplasm Of The Head, Face, Or Neck"|"2"|"1"  
"97887"|"Hydrocodone-Acetaminophen 10-325 MG Oral Tablet"|"82328"|"Open Wound Of The Hip/Thigh Region"|"2"|"1"  
"97887"|"Hydrocodone-Acetaminophen 10-325 MG Oral Tablet"|"85604"|"Generalized Pain"|"2"|"0.666667"  
"97887"|"Hydrocodone-Acetaminophen 10-325 MG Oral Tablet"|"85614"|"Joint Pain, Localized In The Hip"|"7"|"0.241379"  
"97887"|"Hydrocodone-Acetaminophen 10-325 MG Oral Tablet"|"85623"|"Joint Pain, Localized In The Knee"|"8"|"0.205128"  
"97887"|"Hydrocodone-Acetaminophen 10-325 MG Oral Tablet"|"85638"|"Ankle Joint Pain"|"8"|"0.222222"  
"97887"|"Hydrocodone-Acetaminophen 10-325 MG Oral Tablet"|"85644"|"Foot Pain (Soft Tissue)"|"2"|"0.222222"  
"97887"|"Hydrocodone-Acetaminophen 10-325 MG Oral Tablet"|"85701"|"Joint Pain, Localized In The Shoulder"|"5"|"0.384615"  
"97887"|"Hydrocodone-Acetaminophen 10-325 MG Oral Tablet"|"91089"|"Lower Back Pain"|"21"|"0.381818"  
"97887"|"Hydrocodone-Acetaminophen 10-325 MG Oral Tablet"|"166827"|"Hydronephrosis On The Right"|"2"|"1"  
"97887"|"Hydrocodone-Acetaminophen 10-325 MG Oral Tablet"|"168811"|"Traumatic Arthritis Of The

Ankle|"3|"0.428571"  
"97887|"Hydrocodone-Acetaminophen 10-325 MG Oral Tablet|"168814|"Traumatic Arthritis Of The Foot|"2|"1"  
"97887|"Hydrocodone-Acetaminophen 10-325 MG Oral Tablet|"172086|"Lumbar Strain|"3|"0.6"  
"97887|"Hydrocodone-Acetaminophen 10-325 MG Oral Tablet|"202911|"Aftercare Following Surgery|"3|"1"  
"97887|"Hydrocodone-Acetaminophen 10-325 MG Oral Tablet|"251467|"Limb Pain|"49|"0.556818"  
"97887|"Hydrocodone-Acetaminophen 10-325 MG Oral Tablet|"252496|"Female Pelvic Pain|"2|"0.4"  
"97887|"Hydrocodone-Acetaminophen 10-325 MG Oral Tablet|"259138|"Rib Fracture|"34|"1"  
"97887|"Hydrocodone-Acetaminophen 10-325 MG Oral Tablet|"278691|"Lumbar Facet Syndrome|"2|"0.5"  
"97887|"Hydrocodone-Acetaminophen 10-325 MG Oral Tablet|"278808|"Breast Cancer|"3|"0.12"  
"97887|"Hydrocodone-Acetaminophen 10-325 MG Oral Tablet|"278812|"Prostate Cancer|"2|"0.4"  
"97887|"Hydrocodone-Acetaminophen 10-325 MG Oral Tablet|"288920|"Acute Post-thoracotomy  
Pain|"2|"0.666667"  
"97887|"Hydrocodone-Acetaminophen 10-325 MG Oral Tablet|"288921|"Chronic Pain|"15|"0.416667"  
"97887|"Hydrocodone-Acetaminophen 10-325 MG Oral Tablet|"288977|"Fibromyalgia|"3|"0.103448"  
"97893|"Estradiol 0.05 MG/24HR Transdermal Patch Weekly|"195794|"Symptomatic Menopause|"2|"1"  
"97894|"Estradiol 0.1 MG/24HR Transdermal Patch Weekly|"69214|"Hypopituitarism|"2|"1"  
"97980|"Calcium + D 600-200 MG-UNIT Oral Tablet|"69340|"Osteopenia|"2|"0.333333"  
"97980|"Calcium + D 600-200 MG-UNIT Oral Tablet|"69341|"Osteoporosis|"8|"0.363636"  
"97989|"Desmopressin Acetate Spray 0.01 % Nasal Solution|"69214|"Hypopituitarism|"2|"0.666667"  
"97989|"Desmopressin Acetate Spray 0.01 % Nasal Solution|"69542|"Central Diabetes Insipidus|"2|"0.666667"  
"97989|"Desmopressin Acetate Spray 0.01 % Nasal Solution|"75880|"Enuresis|"4|"0.8"  
"97991|"Keppra 750 MG Oral Tablet|"74988|"Seizure Disorder|"5|"0.2"  
"97991|"Keppra 750 MG Oral Tablet|"75001|"Partial Complex Psychomotor Seizure|"3|"1"  
"97991|"Keppra 750 MG Oral Tablet|"75002|"Partial Complex Psychomotor Seizure With Intractable  
Seizure|"5|"0.454545"  
"97991|"Keppra 750 MG Oral Tablet|"252546|"Generalized Convulsive Seizure|"2|"0.666667"  
"98029|"Folic Acid 5 MG Oral Capsule|"257912|"Disorder Of Mitochondrial Metabolism|"6|"1"  
"98043|"Lipitor 80 MG Oral Tablet|"62975|"Coronary Artery Disease|"19|"0.131034"  
"98043|"Lipitor 80 MG Oral Tablet|"62978|"Coronary Arteriosclerosis|"3|"0.214286"  
"98043|"Lipitor 80 MG Oral Tablet|"63148|"2-vessel Coronary Artery Stenosis|"2|"0.25"  
"98043|"Lipitor 80 MG Oral Tablet|"67969|"Familial Combined Hyperlipidemia|"3|"0.6"  
"98043|"Lipitor 80 MG Oral Tablet|"67970|"Hyperlipidemia|"104|"0.512315"  
"98043|"Lipitor 80 MG Oral Tablet|"283291|"Hypercholesterolemia|"4|"0.5"  
"98043|"Lipitor 80 MG Oral Tablet|"283292|"Essential Hypercholesterolemia|"6|"0.352941"  
"98043|"Lipitor 80 MG Oral Tablet|"291485|"Dyslipidemia|"12|"0.521739"  
"98066|"Malarone 250-100 MG Oral Tablet|"296447|"Preventive Medicine Counseling About Travel|"4|"1"  
"98108|"Concerta 18 MG Oral Tablet Extended Release|"75818|"Attention-deficit Hyperactivity  
Disorder|"13|"0.565217"  
"98108|"Concerta 18 MG Oral Tablet Extended Release|"75819|"ADHD, Predominantly Inattentive  
Type|"7|"0.636364"  
"98108|"Concerta 18 MG Oral Tablet Extended Release|"275486|"ADHD, Combined Type|"22|"0.733333"  
"98108|"Concerta 18 MG Oral Tablet Extended Release|"275492|"ADHD, Predominantly Hyperactive -  
Impulsive|"7|"0.7"  
"98109|"Concerta 36 MG Oral Tablet Extended Release|"75818|"Attention-deficit Hyperactivity  
Disorder|"12|"0.461538"  
"98109|"Concerta 36 MG Oral Tablet Extended Release|"75819|"ADHD, Predominantly Inattentive  
Type|"6|"0.666667"  
"98109|"Concerta 36 MG Oral Tablet Extended Release|"275486|"ADHD, Combined Type|"22|"0.785714"  
"98109|"Concerta 36 MG Oral Tablet Extended Release|"291687|"Attention Deficit Disorder Without  
Hyperactivity|"2|"0.25"  
"98120|"Vaniqa 13.9 % External Cream|"60996|"Excessive Facial Or Body Hair (Hirsutism)"|"2|"0.666667"  
"98120|"Vaniqa 13.9 % External Cream|"278396|"Hirsutism|"5|"0.714286"  
"98130|"Neomycin-Polymyxin-HC 3.5-10000-1 Otic Suspension|"62322|"Otitis Externa|"4|"0.8"  
"98130|"Neomycin-Polymyxin-HC 3.5-10000-1 Otic Suspension|"62329|"Acute Otitis Externa|"2|"1"

"98131"|"Antipyrine-Benzocaine 54-14 MG/ML Otic Solution"|"265990"|"Earache (Symptom)"|"2"|"0.666667"  
"98138"|"CycloSPORINE Modified 25 MG Oral Capsule"|"166834"|"Renal Transplant Recipient Of The Right  
Kidney"|"2"|"1"  
"98138"|"CycloSPORINE Modified 25 MG Oral Capsule"|"192220"|"Renal Transplant"|"3"|"0.5"  
"98140"|"Depakote ER 500 MG Oral Tablet Extended Release 24 Hour"|"30261"|"Bipolar I Disorder, Most Recent  
Episode, Depressed - Severe With Psychotic Features"|"2"|"1"  
"98140"|"Depakote ER 500 MG Oral Tablet Extended Release 24 Hour"|"74988"|"Seizure Disorder"|"3"|"0.142857"  
"98140"|"Depakote ER 500 MG Oral Tablet Extended Release 24 Hour"|"75000"|"Partial Simple Seizure With  
Intractable Seizure"|"2"|"1"  
"98140"|"Depakote ER 500 MG Oral Tablet Extended Release 24 Hour"|"75002"|"Partial Complex Psychomotor  
Seizure With Intractable Seizure"|"3"|"0.5"  
"98140"|"Depakote ER 500 MG Oral Tablet Extended Release 24 Hour"|"76233"|"Paranoid Schizophrenia,  
Subchronic"|"2"|"1"  
"98140"|"Depakote ER 500 MG Oral Tablet Extended Release 24 Hour"|"76238"|"Paranoid Schizophrenia,  
Stable"|"3"|"1"  
"98140"|"Depakote ER 500 MG Oral Tablet Extended Release 24 Hour"|"76306"|"Episodic Mood Disorders"|"2"|"0.5"  
"98140"|"Depakote ER 500 MG Oral Tablet Extended Release 24 Hour"|"76329"|"Bipolar I Disorder, Most Recent  
Episode, Mixed In Partial Remission"|"2"|"1"  
"98140"|"Depakote ER 500 MG Oral Tablet Extended Release 24 Hour"|"76388"|"Bipolar Disorder NOS"|"2"|"0.4"  
"98140"|"Depakote ER 500 MG Oral Tablet Extended Release 24 Hour"|"252546"|"Generalized Convulsive  
Seizure"|"5"|"0.5"  
"98140"|"Depakote ER 500 MG Oral Tablet Extended Release 24 Hour"|"252551"|"Generalized Convulsive Tonic-  
clonic Seizure"|"3"|"0.75"  
"98140"|"Depakote ER 500 MG Oral Tablet Extended Release 24 Hour"|"252552"|"Generalized Convulsive Tonic-  
clonic Seizure With Intractable Seizure"|"2"|"0.5"  
"98140"|"Depakote ER 500 MG Oral Tablet Extended Release 24 Hour"|"252570"|"Partial Complex Seizure With  
Secondary Generalization With Intractable Seizure"|"2"|"0.4"  
"98140"|"Depakote ER 500 MG Oral Tablet Extended Release 24 Hour"|"289878"|"Generalized Convulsive Myoclonic  
Seizure, Juvenile"|"4"|"1"  
"98140"|"Depakote ER 500 MG Oral Tablet Extended Release 24 Hour"|"289879"|"Generalized Convulsive Myoclonic  
Seizure, Juvenile With Intractable Seizure"|"2"|"0.666667"  
"98140"|"Depakote ER 500 MG Oral Tablet Extended Release 24 Hour"|"289881"|"Petit Mal Seizure, Juvenile With  
Intractable Seizure"|"2"|"1"  
"98142"|"Differin 0.1 % External Cream"|"69606"|"Acne"|"4"|"0.8"  
"98143"|"Welchol 625 MG Oral Tablet"|"67970"|"Hyperlipidemia"|"29"|"0.467742"  
"98143"|"Welchol 625 MG Oral Tablet"|"69402"|"Diabetes Mellitus Poorly Controlled"|"3"|"0.2"  
"98143"|"Welchol 625 MG Oral Tablet"|"291485"|"Dyslipidemia"|"5"|"0.714286"  
"98183"|"Renagel 800 MG Oral Tablet"|"274711"|"End Stage Renal Disease"|"4"|"0.108108"  
"98193"|"Kaletra 400-100 MG/5ML Oral Solution"|"76835"|"HIV Infection"|"14"|"1"  
"98204"|"Atacand HCT 32-12.5 MG Oral Tablet"|"63467"|"Hypertension"|"4"|"0.5"  
"98211"|"Senna 8.8 MG/5ML Oral Syrup"|"166777"|"Constipation"|"3"|"0.5"  
"98215"|"Qvar 40 MCG/ACT Inhalation Aerosol Solution"|"62598"|"Allergic Rhinitis"|"4"|"0.235294"  
"98215"|"Qvar 40 MCG/ACT Inhalation Aerosol Solution"|"64181"|"Asthma"|"14"|"0.388889"  
"98216"|"Qvar 80 MCG/ACT Inhalation Aerosol Solution"|"60869"|"Cough"|"4"|"0.571429"  
"98216"|"Qvar 80 MCG/ACT Inhalation Aerosol Solution"|"64181"|"Asthma"|"22"|"0.611111"  
"98238"|"Levaquin 750 MG Oral Tablet"|"60869"|"Cough"|"2"|"0.222222"  
"98238"|"Levaquin 750 MG Oral Tablet"|"62578"|"Acute Sinusitis"|"2"|"0.285714"  
"98238"|"Levaquin 750 MG Oral Tablet"|"62586"|"Chronic Maxillary Sinusitis"|"3"|"0.230769"  
"98238"|"Levaquin 750 MG Oral Tablet"|"62587"|"Chronic Frontal Sinusitis"|"2"|"0.222222"  
"98238"|"Levaquin 750 MG Oral Tablet"|"62588"|"Chronic Ethmoidal Sinusitis"|"5"|"0.416667"  
"98238"|"Levaquin 750 MG Oral Tablet"|"64118"|"Acute Bronchitis"|"5"|"0.5"  
"98238"|"Levaquin 750 MG Oral Tablet"|"64223"|"Bronchiectasis"|"3"|"1"  
"98238"|"Levaquin 750 MG Oral Tablet"|"64294"|"Pulmonary Fibrosis"|"2"|"1"  
"98238"|"Levaquin 750 MG Oral Tablet"|"76842"|"Acquired Immunodeficiency Syndrome (AIDS)"|"2"|"0.285714"

"98238"|"Levaquin 750 MG Oral Tablet"|"77890"|"Upper Respiratory Infection"|"3"|"0.3"  
"98238"|"Levaquin 750 MG Oral Tablet"|"77891"|"Acute Upper Respiratory Infection"|"3"|"0.375"  
"98238"|"Levaquin 750 MG Oral Tablet"|"166748"|"Asthma With Acute Exacerbation"|"2"|"0.666667"  
"98241"|"Imitrex 100 MG Oral Tablet"|"74533"|"Migraine Headache"|"3"|"0.1875"  
"98242"|"Glucophage XR 500 MG Oral Tablet Extended Release 24 Hour"|"69380"|"Diabetes Mellitus"|"4"|"0.307692"  
"98242"|"Glucophage XR 500 MG Oral Tablet Extended Release 24 Hour"|"69381"|"Type II Diabetes Mellitus"|"2"|"0.222222"  
"98242"|"Glucophage XR 500 MG Oral Tablet Extended Release 24 Hour"|"69402"|"Diabetes Mellitus Poorly Controlled"|"6"|"0.666667"  
"98266"|"Fosamax 70 MG Oral Tablet"|"69341"|"Osteoporosis"|"6"|"0.171429"  
"98266"|"Fosamax 70 MG Oral Tablet"|"93474"|"Taking Medication - Steroids"|"2"|"0.666667"  
"98280"|"Unithroid 75 MCG Oral Tablet"|"69258"|"Hypothyroidism"|"2"|"1"  
"98290"|"Tazorac 0.1 % External Cream"|"69606"|"Acne"|"2"|"0.666667"  
"98327"|"Trizivir 300-150-300 MG Oral Tablet"|"76835"|"HIV Infection"|"11"|"0.733333"  
"98329"|"Lescol XL 80 MG Oral Tablet Extended Release 24 Hour"|"67970"|"Hyperlipidemia"|"4"|"0.363636"  
"98329"|"Lescol XL 80 MG Oral Tablet Extended Release 24 Hour"|"283292"|"Essential Hypercholesterolemia"|"2"|"0.4"  
"98333"|"Micardis 20 MG Oral Tablet"|"63467"|"Hypertension"|"4"|"0.5"  
"98333"|"Micardis 20 MG Oral Tablet"|"63470"|"Benign Essential Hypertension"|"2"|"0.333333"  
"98344"|"HumaLOG Mix 75/25 75-25 % Subcutaneous Suspension"|"69380"|"Diabetes Mellitus"|"3"|"0.103448"  
"98344"|"HumaLOG Mix 75/25 75-25 % Subcutaneous Suspension"|"69402"|"Diabetes Mellitus Poorly Controlled"|"26"|"0.8125"  
"98354"|"ZyPREXA 20 MG Oral Tablet"|"76213"|"Schizophrenia"|"2"|"0.4"  
"98354"|"ZyPREXA 20 MG Oral Tablet"|"76232"|"Paranoid Schizophrenia"|"2"|"0.666667"  
"98354"|"ZyPREXA 20 MG Oral Tablet"|"76234"|"Paranoid Schizophrenia, Chronic"|"2"|"1"  
"98354"|"ZyPREXA 20 MG Oral Tablet"|"76250"|"Residual Schizophrenia"|"2"|"1"  
"98354"|"ZyPREXA 20 MG Oral Tablet"|"76272"|"Schizoaffective Disorder"|"4"|"1"  
"98355"|"SEROquel 300 MG Oral Tablet"|"30261"|"Bipolar I Disorder, Most Recent Episode, Depressed - Severe With Psychotic Features"|"2"|"1"  
"98355"|"SEROquel 300 MG Oral Tablet"|"76234"|"Paranoid Schizophrenia, Chronic"|"2"|"1"  
"98355"|"SEROquel 300 MG Oral Tablet"|"76272"|"Schizoaffective Disorder"|"3"|"0.6"  
"98355"|"SEROquel 300 MG Oral Tablet"|"76306"|"Episodic Mood Disorders"|"2"|"1"  
"98355"|"SEROquel 300 MG Oral Tablet"|"76327"|"Bipolar I Disorder, Most Recent Episode, Mixed Severe With Psychotic Features"|"2"|"1"  
"98355"|"SEROquel 300 MG Oral Tablet"|"76343"|"Bipolar I Disorder, Most Recent Episode, Depressed - Moderate"|"5"|"1"  
"98355"|"SEROquel 300 MG Oral Tablet"|"76348"|"Bipolar II Disorder"|"5"|"0.714286"  
"98355"|"SEROquel 300 MG Oral Tablet"|"76351"|"Depression"|"3"|"0.214286"  
"98355"|"SEROquel 300 MG Oral Tablet"|"76357"|"Major Depression, Recurrent"|"2"|"0.666667"  
"98355"|"SEROquel 300 MG Oral Tablet"|"76388"|"Bipolar Disorder NOS"|"4"|"0.8"  
"98365"|"Colazal 750 MG Oral Capsule"|"64980"|"Crohn's Disease"|"2"|"1"  
"98397"|"Cartia XT 120 MG Oral Capsule Extended Release 24 Hour"|"63467"|"Hypertension"|"2"|"0.222222"  
"98398"|"Cartia XT 180 MG Oral Capsule Extended Release 24 Hour"|"63467"|"Hypertension"|"2"|"0.285714"  
"98399"|"Cartia XT 240 MG Oral Capsule Extended Release 24 Hour"|"63468"|"Essential Hypertension"|"3"|"0.75"  
"98402"|"Cardizem CD 360 MG Oral Capsule Extended Release 24 Hour"|"63470"|"Benign Essential Hypertension"|"2"|"1"  
"98425"|"Concerta 54 MG Oral Tablet Extended Release"|"75818"|"Attention-deficit Hyperactivity Disorder"|"10"|"0.526316"  
"98425"|"Concerta 54 MG Oral Tablet Extended Release"|"75819"|"ADHD, Predominantly Inattentive Type"|"2"|"0.666667"  
"98425"|"Concerta 54 MG Oral Tablet Extended Release"|"275486"|"ADHD, Combined Type"|"16"|"0.727273"  
"98450"|"Clotrimazole-Betamethasone 1-0.05 % External Cream"|"66213"|"Vaginitis"|"2"|"0.4"  
"98450"|"Clotrimazole-Betamethasone 1-0.05 % External Cream"|"66214"|"Candida Albicans

Vaginitis|"4|"0.444444"  
"98450|"Clotrimazole-Betamethasone 1-0.05 % External Cream|"66249|"Vulvovaginitis|"2|"1"  
"98450|"Clotrimazole-Betamethasone 1-0.05 % External Cream|"66250|"Candida Albicans  
Vulvovaginitis|"6|"0.857143"  
"98450|"Clotrimazole-Betamethasone 1-0.05 % External Cream|"70112|"Atopic Dermatitis|"3|"0.428571"  
"98450|"Clotrimazole-Betamethasone 1-0.05 % External Cream|"70115|"Dermatophytosis|"2|"0.5"  
"98450|"Clotrimazole-Betamethasone 1-0.05 % External Cream|"70126|"Tinea Versicolor|"3|"1"  
"98450|"Clotrimazole-Betamethasone 1-0.05 % External Cream|"70131|"Intertrigo|"3|"1"  
"98450|"Clotrimazole-Betamethasone 1-0.05 % External Cream|"70135|"Seborrheic Dermatitis|"5|"0.625"  
"98450|"Clotrimazole-Betamethasone 1-0.05 % External Cream|"77211|"Vaginal Candidiasis|"3|"0.333333"  
"98450|"Clotrimazole-Betamethasone 1-0.05 % External Cream|"88375|"Skin: A Rash|"9|"0.692308"  
"98450|"Clotrimazole-Betamethasone 1-0.05 % External Cream|"93705|"Dermatitis|"10|"0.769231"  
"98450|"Clotrimazole-Betamethasone 1-0.05 % External Cream|"288764|"Vulvodynia|"2|"1"  
"98452|"Detrol LA 2 MG Oral Capsule Extended Release 24 Hour|"65777|"Urge Incontinence Of Urine|"4|"0.8"  
"98452|"Detrol LA 2 MG Oral Capsule Extended Release 24 Hour|"296638|"Urinary Incontinence|"2|"1"  
"98453|"Detrol LA 4 MG Oral Capsule Extended Release 24 Hour|"65751|"Bladder Disorders|"2|"0.666667"  
"98453|"Detrol LA 4 MG Oral Capsule Extended Release 24 Hour|"65769|"Neurogenic Bladder|"4|"0.5"  
"98453|"Detrol LA 4 MG Oral Capsule Extended Release 24 Hour|"65777|"Urge Incontinence Of Urine|"6|"0.75"  
"98453|"Detrol LA 4 MG Oral Capsule Extended Release 24 Hour|"65855|"Female Stress  
Incontinence|"4|"0.571429"  
"98453|"Detrol LA 4 MG Oral Capsule Extended Release 24 Hour|"75125|"Multiple Sclerosis|"5|"0.25"  
"98453|"Detrol LA 4 MG Oral Capsule Extended Release 24 Hour|"87901|"Urinary Frequency  
Increased|"2|"0.666667"  
"98453|"Detrol LA 4 MG Oral Capsule Extended Release 24 Hour|"257849|"Overflow Incontinence|"2|"1"  
"98453|"Detrol LA 4 MG Oral Capsule Extended Release 24 Hour|"296638|"Urinary Incontinence|"6|"0.375"  
"98463|"Micardis HCT 40-12.5 MG Oral Tablet|"63468|"Essential Hypertension|"2|"0.666667"  
"98466|"Protopic 0.03 % External Ointment|"70112|"Atopic Dermatitis|"10|"0.666667"  
"98466|"Protopic 0.03 % External Ointment|"278350|"Eczema|"6|"0.4"  
"98467|"Protopic 0.1 % External Ointment|"69753|"Eczematoid Dermatitis|"3|"0.428571"  
"98467|"Protopic 0.1 % External Ointment|"70112|"Atopic Dermatitis|"4|"0.571429"  
"98467|"Protopic 0.1 % External Ointment|"278350|"Eczema|"4|"0.5"  
"98491|"Tamiflu 12 MG/ML Oral Suspension Reconstituted|"64119|"Influenza|"6|"0.666667"  
"98498|"OneTouch Ultra Blue In Vitro Strip|"69380|"Diabetes Mellitus|"55|"0.25"  
"98498|"OneTouch Ultra Blue In Vitro Strip|"69381|"Type II Diabetes Mellitus|"43|"0.346774"  
"98498|"OneTouch Ultra Blue In Vitro Strip|"69382|"Type II Diabetes Mellitus - Uncomplicated,  
Uncontrolled|"5|"0.238095"  
"98498|"OneTouch Ultra Blue In Vitro Strip|"69387|"Type I Diabetes Mellitus|"17|"0.303571"  
"98498|"OneTouch Ultra Blue In Vitro Strip|"69388|"Type I Diabetes Mellitus - Uncontrolled|"94|"0.854545"  
"98498|"OneTouch Ultra Blue In Vitro Strip|"69401|"Diabetes Mellitus Under Control|"5|"0.454545"  
"98498|"OneTouch Ultra Blue In Vitro Strip|"69402|"Diabetes Mellitus Poorly Controlled|"90|"0.625"  
"98498|"OneTouch Ultra Blue In Vitro Strip|"69461|"Prediabetes|"2|"0.5"  
"98508|"BenzaClin 1-5 % External Gel|"69606|"Acne|"2|"0.285714"  
"98589|"Sodium Chloride 0.65 % Nasal Solution|"62598|"Allergic Rhinitis|"4|"0.666667"  
"98649|"Epidrin 325-65-100 MG Oral Capsule|"60828|"Headache|"3|"1"  
"98649|"Epidrin 325-65-100 MG Oral Capsule|"74529|"Headache Syndromes|"2|"1"  
"98649|"Epidrin 325-65-100 MG Oral Capsule|"74533|"Migraine Headache|"2|"0.666667"  
"98649|"Epidrin 325-65-100 MG Oral Capsule|"74537|"Common Migraine (Without Aura)"|"2|"1"  
"98649|"Epidrin 325-65-100 MG Oral Capsule|"74538|"Common Migraine (Without Aura) With Intractable  
Migraine|"3|"1"  
"98649|"Epidrin 325-65-100 MG Oral Capsule|"293541|"New Daily Persistent Headache|"5|"1"  
"98651|"NexIUM 20 MG Oral Capsule Delayed Release|"60869|"Cough|"4|"0.142857"  
"98651|"NexIUM 20 MG Oral Capsule Delayed Release|"60891|"Heartburn|"2|"0.333333"  
"98651|"NexIUM 20 MG Oral Capsule Delayed Release|"60895|"Vomiting (Symptom)"|"3|"1"  
"98651|"NexIUM 20 MG Oral Capsule Delayed Release|"60899|"Abdominal Pain|"16|"0.444444"

"98651"|"NexIUM 20 MG Oral Capsule Delayed Release"|"62984"|"Atypical Chest Pain"|"3"|"0.214286"  
"98651"|"NexIUM 20 MG Oral Capsule Delayed Release"|"64680"|"Chronic Reflux Esophagitis"|"11"|"0.647059"  
"98651"|"NexIUM 20 MG Oral Capsule Delayed Release"|"64688"|"Esophageal Reflux"|"66"|"0.578947"  
"98651"|"NexIUM 20 MG Oral Capsule Delayed Release"|"64762"|"Dyspepsia"|"2"|"0.5"  
"98651"|"NexIUM 20 MG Oral Capsule Delayed Release"|"87702"|"Nausea With Vomiting"|"3"|"0.6"  
"98651"|"NexIUM 20 MG Oral Capsule Delayed Release"|"87736"|"Abdominal Pain In The Central Upper Belly (Epigastric)"|"3"|"0.75"  
"98651"|"NexIUM 20 MG Oral Capsule Delayed Release"|"87738"|"Abdominal Pain In The Left Upper Belly (LUQ)"|"3"|"1"  
"98651"|"NexIUM 20 MG Oral Capsule Delayed Release"|"116196"|"Abdomen Tenderness Direct Epigastric"|"2"|"0.4"  
"98651"|"NexIUM 20 MG Oral Capsule Delayed Release"|"289114"|"Laryngopharyngeal Reflux"|"4"|"0.666667"  
"98652"|"NexIUM 40 MG Oral Capsule Delayed Release"|"60891"|"Heartburn"|"22"|"0.431373"  
"98652"|"NexIUM 40 MG Oral Capsule Delayed Release"|"60894"|"Nausea (Symptom)"|"7"|"0.112903"  
"98652"|"NexIUM 40 MG Oral Capsule Delayed Release"|"60896"|"Vomiting Blood (Hematemesis)"|"3"|"0.75"  
"98652"|"NexIUM 40 MG Oral Capsule Delayed Release"|"60899"|"Abdominal Pain"|"44"|"0.252874"  
"98652"|"NexIUM 40 MG Oral Capsule Delayed Release"|"64678"|"Esophagitis"|"7"|"0.4375"  
"98652"|"NexIUM 40 MG Oral Capsule Delayed Release"|"64680"|"Chronic Reflux Esophagitis"|"110"|"0.597826"  
"98652"|"NexIUM 40 MG Oral Capsule Delayed Release"|"64688"|"Esophageal Reflux"|"454"|"0.61186"  
"98652"|"NexIUM 40 MG Oral Capsule Delayed Release"|"64708"|"Barrett's Esophagus"|"3"|"0.15"  
"98652"|"NexIUM 40 MG Oral Capsule Delayed Release"|"64748"|"Gastroparesis"|"5"|"0.263158"  
"98652"|"NexIUM 40 MG Oral Capsule Delayed Release"|"64762"|"Dyspepsia"|"4"|"0.2"  
"98652"|"NexIUM 40 MG Oral Capsule Delayed Release"|"64763"|"Gastritis"|"21"|"0.221053"  
"98652"|"NexIUM 40 MG Oral Capsule Delayed Release"|"64781"|"Chronic Atrophic Gastritis"|"2"|"1"  
"98652"|"NexIUM 40 MG Oral Capsule Delayed Release"|"64786"|"Chronic Antral Gastritis"|"2"|"0.4"  
"98652"|"NexIUM 40 MG Oral Capsule Delayed Release"|"64787"|"Chronic Antral H. Pylori Associated Gastritis"|"2"|"0.4"  
"98652"|"NexIUM 40 MG Oral Capsule Delayed Release"|"64825"|"Peptic Ulcer"|"9"|"0.132353"  
"98652"|"NexIUM 40 MG Oral Capsule Delayed Release"|"64826"|"Gastric Ulcer"|"4"|"0.190476"  
"98652"|"NexIUM 40 MG Oral Capsule Delayed Release"|"69445"|"Diabetic Gastropathy"|"2"|"0.2"  
"98652"|"NexIUM 40 MG Oral Capsule Delayed Release"|"70455"|"Rheumatoid Arthritis"|"15"|"0.192308"  
"98652"|"NexIUM 40 MG Oral Capsule Delayed Release"|"70472"|"Systemic Lupus Erythematosus"|"9"|"0.157895"  
"98652"|"NexIUM 40 MG Oral Capsule Delayed Release"|"70475"|"Scleroderma"|"22"|"0.354839"  
"98652"|"NexIUM 40 MG Oral Capsule Delayed Release"|"70477"|"Scleroderma With Pulmonary Involvement"|"3"|"0.333333"  
"98652"|"NexIUM 40 MG Oral Capsule Delayed Release"|"70598"|"Polymyositis / Dermatomyositis"|"2"|"0.2"  
"98652"|"NexIUM 40 MG Oral Capsule Delayed Release"|"70640"|"Wegener's Granulomatosis"|"3"|"0.75"  
"98652"|"NexIUM 40 MG Oral Capsule Delayed Release"|"70706"|"Ankylosing Spondylitis"|"2"|"0.333333"  
"98652"|"NexIUM 40 MG Oral Capsule Delayed Release"|"76976"|"Helicobacter Pylori (H. Pylori) Infection"|"4"|"0.25"  
"98652"|"NexIUM 40 MG Oral Capsule Delayed Release"|"80847"|"Renal Cell Carcinoma"|"3"|"0.25"  
"98652"|"NexIUM 40 MG Oral Capsule Delayed Release"|"87060"|"Hoarseness"|"5"|"0.185185"  
"98652"|"NexIUM 40 MG Oral Capsule Delayed Release"|"87736"|"Abdominal Pain In The Central Upper Belly (Epigastric)"|"18"|"0.4"  
"98652"|"NexIUM 40 MG Oral Capsule Delayed Release"|"87737"|"Abdominal Pain In The Right Upper Belly (RUQ)"|"4"|"0.235294"  
"98652"|"NexIUM 40 MG Oral Capsule Delayed Release"|"87739"|"Abdominal Pain In The Right Lower Belly (RLQ)"|"2"|"0.222222"  
"98652"|"NexIUM 40 MG Oral Capsule Delayed Release"|"87743"|"Diffuse Abdominal Pain"|"9"|"0.692308"  
"98652"|"NexIUM 40 MG Oral Capsule Delayed Release"|"87744"|"Abdominal Pain In Multiple Locations"|"2"|"0.333333"  
"98652"|"NexIUM 40 MG Oral Capsule Delayed Release"|"116196"|"Abdomen Tenderness Direct Epigastric"|"5"|"0.208333"  
"98652"|"NexIUM 40 MG Oral Capsule Delayed Release"|"116197"|"Abdomen Tenderness Direct RUQ"|"3"|"0.3"  
"98652"|"NexIUM 40 MG Oral Capsule Delayed Release"|"260217"|"Esophageal Cancer"|"2"|"0.222222"

"98652"|"NexIUM 40 MG Oral Capsule Delayed Release"|"278812"|"Prostate Cancer"|"4"|"0.121212"  
"98652"|"NexIUM 40 MG Oral Capsule Delayed Release"|"282704"|"Acute Gastritis"|"10"|"0.37037"  
"98652"|"NexIUM 40 MG Oral Capsule Delayed Release"|"289114"|"Laryngopharyngeal Reflux"|"16"|"0.533333"  
"98652"|"NexIUM 40 MG Oral Capsule Delayed Release"|"289126"|"Eosinophilic Esophagitis"|"2"|"0.5"  
"98652"|"NexIUM 40 MG Oral Capsule Delayed Release"|"292064"|"Dysphagia"|"6"|"0.139535"  
"98653"|"Advair Diskus 100-50 MCG/DOSE MISC"|"64211"|"Chronic Asthmatic Bronchitis"|"2"|"1"  
"98655"|"Advair Diskus 250-50 MCG/DOSE MISC"|"64180"|"Reactive Airway Disease"|"3"|"0.25"  
"98655"|"Advair Diskus 250-50 MCG/DOSE MISC"|"64181"|"Asthma"|"12"|"0.096"  
"98655"|"Advair Diskus 250-50 MCG/DOSE MISC"|"64199"|"Chronic Obstructive Asthma"|"2"|"0.666667"  
"98655"|"Advair Diskus 250-50 MCG/DOSE MISC"|"64205"|"Chronic Obstructive Pulmonary  
Disease"|"8"|"0.133333"  
"98656"|"Advair Diskus 500-50 MCG/DOSE MISC"|"64205"|"Chronic Obstructive Pulmonary  
Disease"|"3"|"0.272727"  
"98694"|"Geodon 40 MG Oral Capsule"|"76212"|"Psychosis"|"2"|"1"  
"98694"|"Geodon 40 MG Oral Capsule"|"76307"|"Bipolar Disorder"|"2"|"0.666667"  
"98694"|"Geodon 40 MG Oral Capsule"|"76388"|"Bipolar Disorder NOS"|"2"|"0.666667"  
"98695"|"Geodon 60 MG Oral Capsule"|"76212"|"Psychosis"|"2"|"1"  
"98695"|"Geodon 60 MG Oral Capsule"|"76272"|"Schizoaffective Disorder"|"2"|"0.666667"  
"98695"|"Geodon 60 MG Oral Capsule"|"76307"|"Bipolar Disorder"|"2"|"0.666667"  
"98696"|"Geodon 80 MG Oral Capsule"|"76272"|"Schizoaffective Disorder"|"4"|"0.8"  
"98696"|"Geodon 80 MG Oral Capsule"|"76307"|"Bipolar Disorder"|"2"|"0.222222"  
"98697"|"Geodon 20 MG Oral Capsule"|"76388"|"Bipolar Disorder NOS"|"2"|"0.666667"  
"98727"|"Zithromax Z-Pak 250 MG Oral Tablet"|"62578"|"Acute Sinusitis"|"3"|"0.230769"  
"98727"|"Zithromax Z-Pak 250 MG Oral Tablet"|"64118"|"Acute Bronchitis"|"9"|"0.321429"  
"98727"|"Zithromax Z-Pak 250 MG Oral Tablet"|"77891"|"Acute Upper Respiratory Infection"|"31"|"0.659574"  
"98740"|"Toprol XL 25 MG Oral Tablet Extended Release 24 Hour"|"63467"|"Hypertension"|"14"|"0.16092"  
"98740"|"Toprol XL 25 MG Oral Tablet Extended Release 24 Hour"|"63468"|"Essential Hypertension"|"5"|"0.25"  
"98826"|"BusPIRone HCl 7.5 MG Oral Tablet"|"76538"|"Panic Disorder With Agoraphobia"|"2"|"0.666667"  
"98866"|"Foradil Aerolizer 12 MCG Inhalation Capsule"|"64181"|"Asthma"|"2"|"0.5"  
"98870"|"Lantus 100 UNIT/ML Subcutaneous Solution"|"69380"|"Diabetes Mellitus"|"72"|"0.285714"  
"98870"|"Lantus 100 UNIT/ML Subcutaneous Solution"|"69381"|"Type II Diabetes Mellitus"|"32"|"0.329897"  
"98870"|"Lantus 100 UNIT/ML Subcutaneous Solution"|"69382"|"Type II Diabetes Mellitus - Uncomplicated,  
Uncontrolled"|"21"|"0.428571"  
"98870"|"Lantus 100 UNIT/ML Subcutaneous Solution"|"69386"|"Type II Diabetes Mellitus With Complication -  
Uncontrolled"|"2"|"0.333333"  
"98870"|"Lantus 100 UNIT/ML Subcutaneous Solution"|"69387"|"Type I Diabetes Mellitus"|"14"|"0.341463"  
"98870"|"Lantus 100 UNIT/ML Subcutaneous Solution"|"69388"|"Type I Diabetes Mellitus -  
Uncontrolled"|"18"|"0.382979"  
"98870"|"Lantus 100 UNIT/ML Subcutaneous Solution"|"69402"|"Diabetes Mellitus Poorly  
Controlled"|"85"|"0.586207"  
"98870"|"Lantus 100 UNIT/ML Subcutaneous Solution"|"258942"|"Type II Diabetes Mellitus - Uncomplicated,  
Controlled"|"8"|"0.727273"  
"98893"|"Metadate CD 20 MG Oral Capsule Extended Release"|"275486"|"ADHD, Combined Type"|"2"|"1"  
"98913"|"Advil 200 MG Oral Capsule"|"73493"|"Ankle Sprain"|"2"|"1"  
"98926"|"Flomax 0.4 MG CP24"|"65825"|"Benign Prostatic Hyperplasia"|"3"|"0.2"  
"98926"|"Flomax 0.4 MG CP24"|"278753"|"Anemia Of Chronic Kidney Disease"|"2"|"0.4"  
"98995"|"Aviane 0.1-20 MG-MCG Oral Tablet"|"85949"|"Birth Control Method - Oral Contraceptives"|"2"|"0.5"  
"98995"|"Aviane 0.1-20 MG-MCG Oral Tablet"|"187792"|"Gynecologic Services Contraceptive  
Management"|"6"|"0.75"  
"98995"|"Aviane 0.1-20 MG-MCG Oral Tablet"|"250989"|"Oral Contraceptives"|"4"|"0.571429"  
"98996"|"CeleXA 10 MG Oral Tablet"|"76351"|"Depression"|"5"|"0.357143"  
"99048"|"Natalvit Oral Tablet"|"274406"|"Pregnancy Test Positive"|"2"|"1"  
"99049"|"Aspirin EC Low Dose 81 MG Oral Tablet Delayed Release"|"62975"|"Coronary Artery Disease"|"2"|"0.5"  
"99096"|"Yasmin 28 3-0.03 MG Oral Tablet"|"66133"|"Dysmenorrhea"|"2"|"0.5"

"99096"|"Yasmin 28 3-0.03 MG Oral Tablet"|"69549"|"Polycystic Ovarian Syndrome"|"10"|"0.47619"  
"99096"|"Yasmin 28 3-0.03 MG Oral Tablet"|"182924"|"Preventive Medicine New Patient Evaluation Adult 18-39"|"2"|"0.5"  
"99096"|"Yasmin 28 3-0.03 MG Oral Tablet"|"187792"|"Gynecologic Services Contraceptive Management"|"14"|"0.666667"  
"99096"|"Yasmin 28 3-0.03 MG Oral Tablet"|"187793"|"Gynecologic Services Contraceptive General Counseling"|"2"|"0.5"  
"99096"|"Yasmin 28 3-0.03 MG Oral Tablet"|"250989"|"Oral Contraceptives"|"3"|"0.375"  
"99211"|"Trileptal 300 MG/5ML Oral Suspension"|"74988"|"Seizure Disorder"|"10"|"0.25641"  
"99211"|"Trileptal 300 MG/5ML Oral Suspension"|"297231"|"Epilepsy"|"4"|"1"  
"99334"|"Axert 12.5 MG Oral Tablet"|"74533"|"Migraine Headache"|"3"|"0.5"  
"99334"|"Axert 12.5 MG Oral Tablet"|"74537"|"Common Migraine (Without Aura)"|"2"|"1"  
"99562"|"Rapamune 1 MG Oral Tablet"|"74884"|"Subependymal Giant Cell Astrocytoma"|"2"|"1"  
"99562"|"Rapamune 1 MG Oral Tablet"|"166834"|"Renal Transplant Recipient Of The Right Kidney"|"3"|"1"  
"99562"|"Rapamune 1 MG Oral Tablet"|"278812"|"Prostate Cancer"|"2"|"1"  
"99587"|"Icar 15 MG Oral Tablet Chewable"|"77962"|"Anemia"|"2"|"0.5"  
"99634"|"Nitro-Bid 2 % Transdermal Ointment"|"63759"|"Raynaud's Phenomenon"|"2"|"0.666667"  
"99634"|"Nitro-Bid 2 % Transdermal Ointment"|"70475"|"Scleroderma"|"2"|"0.4"  
"99643"|"Diovan 320 MG Oral Tablet"|"62975"|"Coronary Artery Disease"|"4"|"0.1"  
"99643"|"Diovan 320 MG Oral Tablet"|"63467"|"Hypertension"|"38"|"0.316667"  
"99643"|"Diovan 320 MG Oral Tablet"|"63468"|"Essential Hypertension"|"20"|"0.51282"  
"99643"|"Diovan 320 MG Oral Tablet"|"63470"|"Benign Essential Hypertension"|"16"|"0.390244"  
"99670"|"NovoLOG 100 UNIT/ML Subcutaneous Solution"|"69380"|"Diabetes Mellitus"|"29"|"0.160221"  
"99670"|"NovoLOG 100 UNIT/ML Subcutaneous Solution"|"69381"|"Type II Diabetes Mellitus"|"17"|"0.303571"  
"99670"|"NovoLOG 100 UNIT/ML Subcutaneous Solution"|"69382"|"Type II Diabetes Mellitus - Uncomplicated, Uncontrolled"|"6"|"0.3"  
"99670"|"NovoLOG 100 UNIT/ML Subcutaneous Solution"|"69387"|"Type I Diabetes Mellitus"|"33"|"0.407407"  
"99670"|"NovoLOG 100 UNIT/ML Subcutaneous Solution"|"69388"|"Type I Diabetes Mellitus - Uncontrolled"|"89"|"0.760684"  
"99670"|"NovoLOG 100 UNIT/ML Subcutaneous Solution"|"69401"|"Diabetes Mellitus Under Control"|"2"|"0.285714"  
"99670"|"NovoLOG 100 UNIT/ML Subcutaneous Solution"|"69402"|"Diabetes Mellitus Poorly Controlled"|"73"|"0.675926"  
"99670"|"NovoLOG 100 UNIT/ML Subcutaneous Solution"|"258942"|"Type II Diabetes Mellitus - Uncomplicated, Controlled"|"3"|"0.6"  
"99703"|"Accu-Chek Compact In Vitro Strip"|"69380"|"Diabetes Mellitus"|"3"|"0.333333"  
"99703"|"Accu-Chek Compact In Vitro Strip"|"69381"|"Type II Diabetes Mellitus"|"4"|"0.666667"  
"99703"|"Accu-Chek Compact In Vitro Strip"|"69402"|"Diabetes Mellitus Poorly Controlled"|"3"|"0.375"  
"99704"|"Accu-Chek Active In Vitro Strip"|"69380"|"Diabetes Mellitus"|"5"|"0.416667"  
"99704"|"Accu-Chek Active In Vitro Strip"|"69382"|"Type II Diabetes Mellitus - Uncomplicated, Uncontrolled"|"2"|"1"  
"99704"|"Accu-Chek Active In Vitro Strip"|"69402"|"Diabetes Mellitus Poorly Controlled"|"2"|"0.285714"  
"99715"|"Klor-Con M10 10 MEQ Oral Tablet Extended Release"|"63217"|"Congestive Heart Failure"|"3"|"0.375"  
"99715"|"Klor-Con M10 10 MEQ Oral Tablet Extended Release"|"63468"|"Essential Hypertension"|"4"|"0.285714"  
"99715"|"Klor-Con M10 10 MEQ Oral Tablet Extended Release"|"68089"|"Hypokalemia"|"4"|"0.666667"  
"99718"|"Klor-Con M20 20 MEQ Oral Tablet Extended Release"|"62975"|"Coronary Artery Disease"|"5"|"0.121951"  
"99718"|"Klor-Con M20 20 MEQ Oral Tablet Extended Release"|"63217"|"Congestive Heart Failure"|"6"|"0.162162"  
"99718"|"Klor-Con M20 20 MEQ Oral Tablet Extended Release"|"63468"|"Essential Hypertension"|"7"|"0.148936"  
"99718"|"Klor-Con M20 20 MEQ Oral Tablet Extended Release"|"63470"|"Benign Essential Hypertension"|"6"|"0.176471"  
"99718"|"Klor-Con M20 20 MEQ Oral Tablet Extended Release"|"68089"|"Hypokalemia"|"8"|"0.5"  
"99765"|"Loestrin Fe 1.5/30 1.5-30 MG-MCG Oral Tablet"|"66087"|"Endometriosis"|"2"|"1"  
"99766"|"Loestrin Fe 1/20 1-20 MG-MCG Oral Tablet"|"187792"|"Gynecologic Services Contraceptive Management"|"4"|"1"  
"99768"|"Microgestin FE 1/20 1-20 MG-MCG Oral Tablet"|"187792"|"Gynecologic Services Contraceptive

Management|"9|"0.642857"  
"99781|"Flonase 50 MCG/ACT Nasal Suspension|"62585|"Chronic Sinusitis|"2|"0.285714"  
"99781|"Flonase 50 MCG/ACT Nasal Suspension|"62598|"Allergic Rhinitis|"10|"0.188679"  
"99784|"Toprol XL 50 MG Oral Tablet Extended Release 24 Hour|"62975|"Coronary Artery  
Disease|"4|"0.117647"  
"99784|"Toprol XL 50 MG Oral Tablet Extended Release 24 Hour|"63467|"Hypertension|"12|"0.134831"  
"99784|"Toprol XL 50 MG Oral Tablet Extended Release 24 Hour|"63468|"Essential Hypertension|"6|"0.206897"  
"99784|"Toprol XL 50 MG Oral Tablet Extended Release 24 Hour|"63470|"Benign Essential  
Hypertension|"5|"0.185185"  
"99786|"Toprol XL 100 MG Oral Tablet Extended Release 24 Hour|"63468|"Essential  
Hypertension|"4|"0.222222"  
"99827|"Zomig ZMT 5 MG Oral Tablet Dispersible|"74533|"Migraine Headache|"3|"0.428571"  
"99827|"Zomig ZMT 5 MG Oral Tablet Dispersible|"74537|"Common Migraine (Without Aura)"|"4|"0.8"  
"99827|"Zomig ZMT 5 MG Oral Tablet Dispersible|"74538|"Common Migraine (Without Aura) With Intractable  
Migraine|"2|"0.5"  
"99834|"Phenylade MTE Amino Acid Blend Oral Packet|"75807|"Phenylketonuria|"2|"0.666667"  
"99849|"PC Pediatric Electrolyte Oral Solution|"60902|"Diarrhea (Symptom)"|"3|"1"  
"99889|"Norditropin 15 MG/1.5ML SOLN|"67687|"Growth Hormone Deficiency (Pituitary Dwarfism)"|"2|"0.5"  
"99889|"Norditropin 15 MG/1.5ML SOLN|"69214|"Hypopituitarism|"3|"0.6"  
"99892|"Entocort EC 3 MG Oral Capsule Extended Release 24 Hour|"64980|"Crohn's Disease|"4|"0.666667"  
"99900|"Adderall XR 10 MG Oral Capsule Extended Release 24 Hour|"75818|"Attention-deficit Hyperactivity  
Disorder|"11|"0.733333"  
"99900|"Adderall XR 10 MG Oral Capsule Extended Release 24 Hour|"75819|"ADHD, Predominantly Inattentive  
Type|"7|"0.583333"  
"99900|"Adderall XR 10 MG Oral Capsule Extended Release 24 Hour|"275486|"ADHD, Combined  
Type|"6|"0.857143"  
"99901|"Adderall XR 20 MG Oral Capsule Extended Release 24 Hour|"75818|"Attention-deficit Hyperactivity  
Disorder|"12|"0.545455"  
"99901|"Adderall XR 20 MG Oral Capsule Extended Release 24 Hour|"75819|"ADHD, Predominantly Inattentive  
Type|"10|"0.714286"  
"99901|"Adderall XR 20 MG Oral Capsule Extended Release 24 Hour|"275486|"ADHD, Combined  
Type|"6|"0.666667"  
"99901|"Adderall XR 20 MG Oral Capsule Extended Release 24 Hour|"291687|"Attention Deficit Disorder Without  
Hyperactivity|"4|"0.571429"  
"99902|"Adderall XR 30 MG Oral Capsule Extended Release 24 Hour|"75818|"Attention-deficit Hyperactivity  
Disorder|"4|"0.444444"  
"99902|"Adderall XR 30 MG Oral Capsule Extended Release 24 Hour|"75819|"ADHD, Predominantly Inattentive  
Type|"5|"0.833333"  
"99902|"Adderall XR 30 MG Oral Capsule Extended Release 24 Hour|"75820|"ATTENTION-DEFICIT  
DISORDER WITH HYPERACTIVITY|"2|"1"  
"99902|"Adderall XR 30 MG Oral Capsule Extended Release 24 Hour|"275486|"ADHD, Combined  
Type|"4|"0.666667"  
"99958|"FreeStyle Test In Vitro Strip|"69380|"Diabetes Mellitus|"23|"0.45098"  
"99958|"FreeStyle Test In Vitro Strip|"69381|"Type II Diabetes Mellitus|"6|"0.26087"  
"99958|"FreeStyle Test In Vitro Strip|"69382|"Type II Diabetes Mellitus - Uncomplicated, Uncontrolled|"3|"0.25"  
"99958|"FreeStyle Test In Vitro Strip|"69387|"Type I Diabetes Mellitus|"5|"0.555556"  
"99958|"FreeStyle Test In Vitro Strip|"69388|"Type I Diabetes Mellitus - Uncontrolled|"2|"0.25"  
"99958|"FreeStyle Test In Vitro Strip|"69401|"Diabetes Mellitus Under Control|"2|"0.666667"  
"99958|"FreeStyle Test In Vitro Strip|"69402|"Diabetes Mellitus Poorly Controlled|"13|"0.65"  
"99960|"Viread 300 MG Oral Tablet|"76835|"HIV Infection|"10|"0.625"  
"99960|"Viread 300 MG Oral Tablet|"76842|"Acquired Immunodeficiency Syndrome (AIDS)"|"3|"0.428571"  
"100002|"Diovan 80 MG Oral Tablet|"34588|"Proteinuria|"5|"0.454545"  
"100002|"Diovan 80 MG Oral Tablet|"63217|"Congestive Heart Failure|"3|"0.125"  
"100002|"Diovan 80 MG Oral Tablet|"63467|"Hypertension|"47|"0.356061"

"100002"|"Diovan 80 MG Oral Tablet"|"63468"|"Essential Hypertension"|"14"|"0.358974"  
"100002"|"Diovan 80 MG Oral Tablet"|"63470"|"Benign Essential Hypertension"|"26"|"0.52"  
"100009"|"Diovan 160 MG Oral Tablet"|"63467"|"Hypertension"|"78"|"0.395939"  
"100009"|"Diovan 160 MG Oral Tablet"|"63468"|"Essential Hypertension"|"29"|"0.5"  
"100009"|"Diovan 160 MG Oral Tablet"|"63470"|"Benign Essential Hypertension"|"32"|"0.484848"  
"100036"|"Kineret 100 MG/0.67ML Subcutaneous Solution"|"70460"|"Adult Still's Disease"|"2"|"1"  
"100104"|"Frova 2.5 MG Oral Tablet"|"74533"|"Migraine Headache"|"3"|"0.3"  
"100104"|"Frova 2.5 MG Oral Tablet"|"74537"|"Common Migraine (Without Aura)"|"3"|"0.5"  
"100104"|"Frova 2.5 MG Oral Tablet"|"74538"|"Common Migraine (Without Aura) With Intractable Migraine"|"2"|"1"  
"100105"|"Tracleer 62.5 MG Oral Tablet"|"63484"|"Pulmonary Hypertension"|"3"|"0.5"  
"100106"|"Tracleer 125 MG Oral Tablet"|"63484"|"Pulmonary Hypertension"|"21"|"0.875"  
"100106"|"Tracleer 125 MG Oral Tablet"|"63488"|"Secondary Pulmonary Hypertension"|"8"|"0.571429"  
"100186"|"Clarinox 5 MG Oral Tablet"|"62598"|"Allergic Rhinitis"|"27"|"0.54"  
"100186"|"Clarinox 5 MG Oral Tablet"|"87011"|"Drip Or Drainage Down Throat From Above"|"2"|"0.666667"  
"100210"|"Aspirin 81 MG Oral Tablet Delayed Release"|"62975"|"Coronary Artery Disease"|"7"|"0.318182"  
"100210"|"Aspirin 81 MG Oral Tablet Delayed Release"|"63217"|"Congestive Heart Failure"|"2"|"0.25"  
"100217"|"Lisinopril 20 MG Oral Tablet"|"62975"|"Coronary Artery Disease"|"38"|"0.116923"  
"100217"|"Lisinopril 20 MG Oral Tablet"|"63173"|"Cardiomyopathy"|"3"|"0.142857"  
"100217"|"Lisinopril 20 MG Oral Tablet"|"63174"|"Dilated Cardiomyopathy"|"6"|"0.4"  
"100217"|"Lisinopril 20 MG Oral Tablet"|"63217"|"Congestive Heart Failure"|"18"|"0.119205"  
"100217"|"Lisinopril 20 MG Oral Tablet"|"63233"|"Benign Hypertensive Heart Disease With Congestive Heart Failure"|"3"|"0.75"  
"100217"|"Lisinopril 20 MG Oral Tablet"|"63285"|"Mitral Regurgitation"|"3"|"0.2"  
"100217"|"Lisinopril 20 MG Oral Tablet"|"63467"|"Hypertension"|"357"|"0.407534"  
"100217"|"Lisinopril 20 MG Oral Tablet"|"63468"|"Essential Hypertension"|"185"|"0.528571"  
"100217"|"Lisinopril 20 MG Oral Tablet"|"63469"|"Systolic Hypertension"|"2"|"0.5"  
"100217"|"Lisinopril 20 MG Oral Tablet"|"63470"|"Benign Essential Hypertension"|"162"|"0.529412"  
"100217"|"Lisinopril 20 MG Oral Tablet"|"63471"|"Accelerated Essential Hypertension"|"3"|"0.272727"  
"100217"|"Lisinopril 20 MG Oral Tablet"|"65676"|"Nephrotic Syndrome Due To Focal Segmental Sclerosing Glomerulonephritis"|"2"|"0.5"  
"100217"|"Lisinopril 20 MG Oral Tablet"|"69388"|"Type I Diabetes Mellitus - Uncontrolled"|"3"|"0.230769"  
"100217"|"Lisinopril 20 MG Oral Tablet"|"70475"|"Scleroderma"|"3"|"0.333333"  
"100217"|"Lisinopril 20 MG Oral Tablet"|"250862"|"Chronic Combined Systolic And Diastolic Congestive Heart Failure"|"2"|"0.285714"  
"100217"|"Lisinopril 20 MG Oral Tablet"|"250864"|"Diastolic Congestive Heart Failure"|"2"|"0.4"  
"100217"|"Lisinopril 20 MG Oral Tablet"|"270712"|"ACP Staging Stage 1 Hypertension: 140-159 / 90-99"|"3"|"0.333333"  
"100217"|"Lisinopril 20 MG Oral Tablet"|"270715"|"ACP Staging Stage 2 Hypertension: Greater Than Or = 160/100"|"2"|"0.333333"  
"100217"|"Lisinopril 20 MG Oral Tablet"|"274604"|"Chronic Kidney Disease, Stage 1"|"2"|"0.333333"  
"100217"|"Lisinopril 20 MG Oral Tablet"|"274611"|"Nephritis Due To SLE"|"2"|"0.5"  
"100220"|"Mineral Oil Rectal Enema"|"166777"|"Constipation"|"2"|"1"  
"100228"|"SulfaSALazine 500 MG Oral Tablet Delayed Release"|"70455"|"Rheumatoid Arthritis"|"12"|"0.923077"  
"100228"|"SulfaSALazine 500 MG Oral Tablet Delayed Release"|"70706"|"Ankylosing Spondylitis"|"8"|"1"  
"100228"|"SulfaSALazine 500 MG Oral Tablet Delayed Release"|"70722"|"Spondylitis"|"4"|"1"  
"100229"|"Testosterone Cypionate 200 MG/ML Intramuscular Oil"|"69214"|"Hypopituitarism"|"2"|"0.5"  
"100229"|"Testosterone Cypionate 200 MG/ML Intramuscular Oil"|"69588"|"Hypogonadism"|"13"|"0.65"  
"100229"|"Testosterone Cypionate 200 MG/ML Intramuscular Oil"|"69597"|"Micropenis"|"2"|"0.5"  
"100229"|"Testosterone Cypionate 200 MG/ML Intramuscular Oil"|"76651"|"Male Erectile Disorder"|"2"|"0.25"  
"100229"|"Testosterone Cypionate 200 MG/ML Intramuscular Oil"|"168513"|"Hypogonadotropic Hypogonadism"|"3"|"0.75"  
"100239"|"Cefuroxime Axetil 250 MG Oral Tablet"|"65762"|"Urinary Tract Infection"|"2"|"0.666667"  
"100240"|"Cefuroxime Axetil 500 MG Oral Tablet"|"62578"|"Acute Sinusitis"|"2"|"0.666667"  
"100240"|"Cefuroxime Axetil 500 MG Oral Tablet"|"62588"|"Chronic Ethmoidal Sinusitis"|"2"|"0.666667"

"100240""Cefuroxime Axetil 500 MG Oral Tablet""64126""Pneumonia""3""0.75"  
"100240""Cefuroxime Axetil 500 MG Oral Tablet""251528""Acute Otitis Media""2""0.666667"  
"100245""Desonide 0.05 % External Lotion""70112""Atopic Dermatitis""2""0.4"  
"100245""Desonide 0.05 % External Lotion""278350""Eczema""7""0.875"  
"100246""Flecainide Acetate 100 MG Oral Tablet""62908""Automatic Atrial Tachycardia""2""0.5"  
"100246""Flecainide Acetate 100 MG Oral Tablet""62916""Atrial Fibrillation""15""0.714286"  
"100246""Flecainide Acetate 100 MG Oral Tablet""62926""Premature Ventricular Contractions""2""1"  
"100247""Flecainide Acetate 150 MG Oral Tablet""62916""Atrial Fibrillation""8""0.8"  
"100248""Flecainide Acetate 50 MG Oral Tablet""62908""Automatic Atrial Tachycardia""2""1"  
"100248""Flecainide Acetate 50 MG Oral Tablet""62916""Atrial Fibrillation""12""0.75"  
"100249""Fludrocortisone Acetate 0.1 MG Oral Tablet""61038""Dizziness""2""0.666667"  
"100249""Fludrocortisone Acetate 0.1 MG Oral Tablet""61041""Fainting (Syncope)""4""0.444444"  
"100249""Fludrocortisone Acetate 0.1 MG Oral Tablet""69464""Congenital Adrenal Hyperplasia""19""0.863636"  
"100249""Fludrocortisone Acetate 0.1 MG Oral Tablet""69465""21-hydroxylase Deficiency (Salt  
Losing)""5""0.625"  
"100249""Fludrocortisone Acetate 0.1 MG Oral Tablet""69526""Hypotension""2""1"  
"100249""Fludrocortisone Acetate 0.1 MG Oral Tablet""69527""Orthostatic Hypotension""7""0.538462"  
"100249""Fludrocortisone Acetate 0.1 MG Oral Tablet""75080""Parkinson's Disease""2""0.222222"  
"100249""Fludrocortisone Acetate 0.1 MG Oral Tablet""291853""Adrenal Insufficiency""5""0.833333"  
"100249""Fludrocortisone Acetate 0.1 MG Oral Tablet""291855""Addisonian Crisis""2""1"  
"100253""Lisinopril 10 MG Oral Tablet""34588""Proteinuria""17""0.265625"  
"100253""Lisinopril 10 MG Oral Tablet""62975""Coronary Artery Disease""34""0.107256"  
"100253""Lisinopril 10 MG Oral Tablet""63148""2-vessel Coronary Artery Stenosis""3""0.272727"  
"100253""Lisinopril 10 MG Oral Tablet""63173""Cardiomyopathy""7""0.269231"  
"100253""Lisinopril 10 MG Oral Tablet""63174""Dilated Cardiomyopathy""6""0.25"  
"100253""Lisinopril 10 MG Oral Tablet""63217""Congestive Heart Failure""21""0.157895"  
"100253""Lisinopril 10 MG Oral Tablet""63224""Congestive Heart Failure With Systolic And Diastolic  
Dysfunction""2""0.666667"  
"100253""Lisinopril 10 MG Oral Tablet""63233""Benign Hypertensive Heart Disease With Congestive Heart  
Failure""3""0.375"  
"100253""Lisinopril 10 MG Oral Tablet""63285""Mitral Regurgitation""4""0.190476"  
"100253""Lisinopril 10 MG Oral Tablet""63467""Hypertension""355""0.378465"  
"100253""Lisinopril 10 MG Oral Tablet""63468""Essential Hypertension""168""0.491228"  
"100253""Lisinopril 10 MG Oral Tablet""63470""Benign Essential Hypertension""183""0.554545"  
"100253""Lisinopril 10 MG Oral Tablet""63471""Accelerated Essential Hypertension""3""0.25"  
"100253""Lisinopril 10 MG Oral Tablet""65674""Nephrotic Syndrome""2""0.25"  
"100253""Lisinopril 10 MG Oral Tablet""69380""Diabetes Mellitus""18""0.0336449"  
"100253""Lisinopril 10 MG Oral Tablet""70472""Systemic Lupus Erythematosus""4""0.137931"  
"100253""Lisinopril 10 MG Oral Tablet""250579""Blood Pressure Isolated Elevated""16""0.258065"  
"100253""Lisinopril 10 MG Oral Tablet""270712""ACP Staging Stage 1 Hypertension: 140-159 / 90-  
99""3""0.428571"  
"100253""Lisinopril 10 MG Oral Tablet""270715""ACP Staging Stage 2 Hypertension: Greater Than Or =  
160/100""5""0.555556"  
"100253""Lisinopril 10 MG Oral Tablet""274611""Nephritis Due To SLE""2""0.25"  
"100253""Lisinopril 10 MG Oral Tablet""274717""Microalbuminuria""7""0.269231"  
"100253""Lisinopril 10 MG Oral Tablet""282327""Prehypertension""2""0.285714"  
"100254""Lisinopril 40 MG Oral Tablet""62975""Coronary Artery Disease""20""0.0877193"  
"100254""Lisinopril 40 MG Oral Tablet""63148""2-vessel Coronary Artery Stenosis""2""0.2"  
"100254""Lisinopril 40 MG Oral Tablet""63467""Hypertension""261""0.442373"  
"100254""Lisinopril 40 MG Oral Tablet""63468""Essential Hypertension""127""0.477444"  
"100254""Lisinopril 40 MG Oral Tablet""63470""Benign Essential Hypertension""118""0.515284"  
"100254""Lisinopril 40 MG Oral Tablet""63471""Accelerated Essential Hypertension""4""0.266667"  
"100254""Lisinopril 40 MG Oral Tablet""65689""Nephrosclerosis With Benign Hypertension""2""0.5"  
"100254""Lisinopril 40 MG Oral Tablet""270712""ACP Staging Stage 1 Hypertension: 140-159 / 90-

99|"2|"0.285714"  
"100254|"Lisinopril 40 MG Oral Tablet|"274672|"Chronic Kidney Disease, Stage 4|"2|"0.25"  
"100255|"Lisinopril 5 MG Oral Tablet|"34588|"Proteinuria|"18|"0.409091"  
"100255|"Lisinopril 5 MG Oral Tablet|"62975|"Coronary Artery Disease|"21|"0.107143"  
"100255|"Lisinopril 5 MG Oral Tablet|"63217|"Congestive Heart Failure|"16|"0.192771"  
"100255|"Lisinopril 5 MG Oral Tablet|"63224|"Congestive Heart Failure With Systolic And Diastolic  
Dysfunction|"3|"1"  
"100255|"Lisinopril 5 MG Oral Tablet|"63467|"Hypertension|"159|"0.355705"  
"100255|"Lisinopril 5 MG Oral Tablet|"63468|"Essential Hypertension|"68|"0.444444"  
"100255|"Lisinopril 5 MG Oral Tablet|"63470|"Benign Essential Hypertension|"77|"0.531034"  
"100255|"Lisinopril 5 MG Oral Tablet|"65578|"Primary IgA Nephritis|"2|"0.666667"  
"100255|"Lisinopril 5 MG Oral Tablet|"65674|"Nephrotic Syndrome|"3|"0.333333"  
"100255|"Lisinopril 5 MG Oral Tablet|"69380|"Diabetes Mellitus|"17|"0.062963"  
"100255|"Lisinopril 5 MG Oral Tablet|"69388|"Type I Diabetes Mellitus - Uncontrolled|"4|"0.25"  
"100255|"Lisinopril 5 MG Oral Tablet|"69402|"Diabetes Mellitus Poorly Controlled|"9|"0.142857"  
"100255|"Lisinopril 5 MG Oral Tablet|"70475|"Scleroderma|"3|"0.3"  
"100255|"Lisinopril 5 MG Oral Tablet|"75356|"Cerebral Embolism - With Cerebral Infarction|"2|"0.222222"  
"100255|"Lisinopril 5 MG Oral Tablet|"80847|"Renal Cell Carcinoma|"2|"0.666667"  
"100255|"Lisinopril 5 MG Oral Tablet|"250579|"Blood Pressure Isolated Elevated|"8|"0.216216"  
"100255|"Lisinopril 5 MG Oral Tablet|"250862|"Chronic Combined Systolic And Diastolic Congestive Heart  
Failure|"2|"0.666667"  
"100255|"Lisinopril 5 MG Oral Tablet|"250918|"Chronic Systolic Congestive Heart Failure|"2|"0.333333"  
"100255|"Lisinopril 5 MG Oral Tablet|"270715|"ACP Staging Stage 2 Hypertension: Greater Than Or =  
160/100|"2|"0.5"  
"100255|"Lisinopril 5 MG Oral Tablet|"274717|"Microalbuminuria|"7|"0.466667"  
"100256|"Lisinopril-Hydrochlorothiazide 20-12.5 MG Oral Tablet|"63467|"Hypertension|"75|"0.340909"  
"100256|"Lisinopril-Hydrochlorothiazide 20-12.5 MG Oral Tablet|"63468|"Essential Hypertension|"83|"0.643411"  
"100256|"Lisinopril-Hydrochlorothiazide 20-12.5 MG Oral Tablet|"63470|"Benign Essential  
Hypertension|"76|"0.649573"  
"100256|"Lisinopril-Hydrochlorothiazide 20-12.5 MG Oral Tablet|"63471|"Accelerated Essential  
Hypertension|"2|"0.5"  
"100257|"Lisinopril-Hydrochlorothiazide 20-25 MG Oral Tablet|"63467|"Hypertension|"114|"0.497817"  
"100257|"Lisinopril-Hydrochlorothiazide 20-25 MG Oral Tablet|"63468|"Essential Hypertension|"63|"0.623762"  
"100257|"Lisinopril-Hydrochlorothiazide 20-25 MG Oral Tablet|"63470|"Benign Essential  
Hypertension|"71|"0.612069"  
"100257|"Lisinopril-Hydrochlorothiazide 20-25 MG Oral Tablet|"257908|"Essential  
Hypertriglyceridemia|"2|"0.666667"  
"100257|"Lisinopril-Hydrochlorothiazide 20-25 MG Oral Tablet|"270712|"ACP Staging Stage 1 Hypertension: 140-  
159 / 90-99|"2|"0.4"  
"100258|"Mefloquine HCl 250 MG Oral Tablet|"265849|"Need For Prophylactic Antibiotics|"11|"1"  
"100258|"Mefloquine HCl 250 MG Oral Tablet|"296447|"Preventive Medicine Counseling About  
Travel|"3|"0.428571"  
"100259|"MetFORMIN HCl 500 MG Oral Tablet|"66433|"Pregnancy Complicated By Diabetes  
Mellitus|"2|"0.666667"  
"100259|"MetFORMIN HCl 500 MG Oral Tablet|"67902|"Metabolic Disorders|"6|"0.333333"  
"100259|"MetFORMIN HCl 500 MG Oral Tablet|"69380|"Diabetes Mellitus|"296|"0.372796"  
"100259|"MetFORMIN HCl 500 MG Oral Tablet|"69381|"Type II Diabetes Mellitus|"129|"0.369628"  
"100259|"MetFORMIN HCl 500 MG Oral Tablet|"69382|"Type II Diabetes Mellitus - Uncomplicated,  
Uncontrolled|"32|"0.421053"  
"100259|"MetFORMIN HCl 500 MG Oral Tablet|"69386|"Type II Diabetes Mellitus With Complication -  
Uncontrolled|"2|"0.222222"  
"100259|"MetFORMIN HCl 500 MG Oral Tablet|"69388|"Type I Diabetes Mellitus - Uncontrolled|"7|"0.4375"  
"100259|"MetFORMIN HCl 500 MG Oral Tablet|"69401|"Diabetes Mellitus Under Control|"15|"0.555556"  
"100259|"MetFORMIN HCl 500 MG Oral Tablet|"69402|"Diabetes Mellitus Poorly Controlled|"90|"0.508475"

"100259"|"MetFORMIN HCl 500 MG Oral Tablet"|"69459"|"Alimentary Hypoglycemia"|"2"|"1"  
"100259"|"MetFORMIN HCl 500 MG Oral Tablet"|"69461"|"Prediabetes"|"30"|"0.545455"  
"100259"|"MetFORMIN HCl 500 MG Oral Tablet"|"69549"|"Polycystic Ovarian Syndrome"|"34"|"0.435897"  
"100259"|"MetFORMIN HCl 500 MG Oral Tablet"|"69605"|"Acanthosis Nigricans"|"11"|"0.314286"  
"100259"|"MetFORMIN HCl 500 MG Oral Tablet"|"79017"|"Hepatocellular Carcinoma Of The Liver"|"6"|"0.5"  
"100259"|"MetFORMIN HCl 500 MG Oral Tablet"|"79148"|"Malignant Pancreatic Neoplasm"|"3"|"0.428571"  
"100259"|"MetFORMIN HCl 500 MG Oral Tablet"|"80841"|"Malignant Neoplasm Of The Kidney"|"2"|"1"  
"100259"|"MetFORMIN HCl 500 MG Oral Tablet"|"80847"|"Renal Cell Carcinoma"|"25"|"0.892857"  
"100259"|"MetFORMIN HCl 500 MG Oral Tablet"|"167265"|"Dysmetabolic Syndrome X"|"4"|"0.235294"  
"100259"|"MetFORMIN HCl 500 MG Oral Tablet"|"181372"|"Renal Carcinoma"|"3"|"0.6"  
"100259"|"MetFORMIN HCl 500 MG Oral Tablet"|"181397"|"Adenoid Squamous Cell Carcinoma Of The Kidney"|"2"|"1"  
"100259"|"MetFORMIN HCl 500 MG Oral Tablet"|"247787"|"Endocrine Laboratory Tests Nonspecific Abnormal Findings"|"2"|"0.5"  
"100259"|"MetFORMIN HCl 500 MG Oral Tablet"|"258942"|"Type II Diabetes Mellitus - Uncomplicated, Controlled"|"18"|"0.428571"  
"100259"|"MetFORMIN HCl 500 MG Oral Tablet"|"258964"|"Impaired Fasting Glucose"|"3"|"0.25"  
"100259"|"MetFORMIN HCl 500 MG Oral Tablet"|"258965"|"Impaired Glucose Tolerance Test"|"2"|"0.666667"  
"100259"|"MetFORMIN HCl 500 MG Oral Tablet"|"260344"|"Liver Cancer"|"3"|"0.75"  
"100259"|"MetFORMIN HCl 500 MG Oral Tablet"|"260898"|"Kidney Cancer"|"9"|"0.6"  
"100259"|"MetFORMIN HCl 500 MG Oral Tablet"|"278285"|"Abnormal Glucose"|"3"|"0.2"  
"100259"|"MetFORMIN HCl 500 MG Oral Tablet"|"278297"|"Glucose Intolerance"|"4"|"0.285714"  
"100259"|"MetFORMIN HCl 500 MG Oral Tablet"|"278396"|"Hirsutism"|"4"|"0.4"  
"100259"|"MetFORMIN HCl 500 MG Oral Tablet"|"278812"|"Prostate Cancer"|"13"|"0.382353"  
"100259"|"MetFORMIN HCl 500 MG Oral Tablet"|"283296"|"Abnormal Weight Gain"|"6"|"0.157895"  
"100260"|"Misoprostol 100 MCG Oral Tablet"|"66176"|"Cervical Stenosis/Stricture"|"3"|"0.75"  
"100261"|"Misoprostol 200 MCG Oral Tablet"|"66070"|"Menorrhagia"|"2"|"0.666667"  
"100261"|"Misoprostol 200 MCG Oral Tablet"|"66074"|"Postmenopausal Bleeding"|"2"|"0.5"  
"100261"|"Misoprostol 200 MCG Oral Tablet"|"66567"|"Abortion"|"2"|"1"  
"100261"|"Misoprostol 200 MCG Oral Tablet"|"66698"|"Missed Abortion"|"5"|"1"  
"100261"|"Misoprostol 200 MCG Oral Tablet"|"80664"|"Leiomyoma Of The Uterus"|"2"|"0.666667"  
"100262"|"Mometasone Furoate 0.1 % External Ointment"|"70112"|"Atopic Dermatitis"|"20"|"0.952381"  
"100262"|"Mometasone Furoate 0.1 % External Ointment"|"93705"|"Dermatitis"|"4"|"1"  
"100262"|"Mometasone Furoate 0.1 % External Ointment"|"278350"|"Eczema"|"4"|"0.8"  
"100264"|"Nizatidine 150 MG Oral Capsule"|"64688"|"Esophageal Reflux"|"4"|"0.666667"  
"100268"|"Tretinoin 0.01 % External Gel"|"69606"|"Acne"|"5"|"0.714286"  
"100270"|"Lisinopril 2.5 MG Oral Tablet"|"34588"|"Proteinuria"|"2"|"0.222222"  
"100270"|"Lisinopril 2.5 MG Oral Tablet"|"62975"|"Coronary Artery Disease"|"7"|"0.152174"  
"100270"|"Lisinopril 2.5 MG Oral Tablet"|"63173"|"Cardiomyopathy"|"3"|"0.375"  
"100270"|"Lisinopril 2.5 MG Oral Tablet"|"63217"|"Congestive Heart Failure"|"5"|"0.15625"  
"100270"|"Lisinopril 2.5 MG Oral Tablet"|"63467"|"Hypertension"|"24"|"0.244898"  
"100270"|"Lisinopril 2.5 MG Oral Tablet"|"63468"|"Essential Hypertension"|"8"|"0.222222"  
"100270"|"Lisinopril 2.5 MG Oral Tablet"|"63470"|"Benign Essential Hypertension"|"14"|"0.4375"  
"100270"|"Lisinopril 2.5 MG Oral Tablet"|"65674"|"Nephrotic Syndrome"|"3"|"1"  
"100270"|"Lisinopril 2.5 MG Oral Tablet"|"69382"|"Type II Diabetes Mellitus - Uncomplicated, Uncontrolled"|"3"|"0.6"  
"100270"|"Lisinopril 2.5 MG Oral Tablet"|"69402"|"Diabetes Mellitus Poorly Controlled"|"4"|"0.190476"  
"100270"|"Lisinopril 2.5 MG Oral Tablet"|"70472"|"Systemic Lupus Erythematosus"|"2"|"0.333333"  
"100270"|"Lisinopril 2.5 MG Oral Tablet"|"250579"|"Blood Pressure Isolated Elevated"|"4"|"0.5"  
"100270"|"Lisinopril 2.5 MG Oral Tablet"|"274717"|"Microalbuminuria"|"5"|"0.384615"  
"100274"|"TraMADol HCl 50 MG Oral Tablet"|"31947"|"Lumbago"|"4"|"0.173913"  
"100274"|"TraMADol HCl 50 MG Oral Tablet"|"60828"|"Headache"|"11"|"0.142857"  
"100274"|"TraMADol HCl 50 MG Oral Tablet"|"62588"|"Chronic Ethmoidal Sinusitis"|"2"|"0.2"  
"100274"|"TraMADol HCl 50 MG Oral Tablet"|"69424"|"Diabetic Peripheral Neuropathy"|"4"|"0.129032"

"100274"|"TraMADol HCl 50 MG Oral Tablet"|"69434"|"Diabetic Autonomic Neuropathy"|"2"|"0.5"  
"100274"|"TraMADol HCl 50 MG Oral Tablet"|"69660"|"Chronic Cutaneous Ulcer"|"3"|"0.3"  
"100274"|"TraMADol HCl 50 MG Oral Tablet"|"70146"|"Osteoarthritis"|"52"|"0.376812"  
"100274"|"TraMADol HCl 50 MG Oral Tablet"|"70188"|"Localized Osteoarthritis Of The Shoulder"|"2"|"0.666667"  
"100274"|"TraMADol HCl 50 MG Oral Tablet"|"70191"|"Localized Osteoarthritis Of The Hand"|"4"|"0.5"  
"100274"|"TraMADol HCl 50 MG Oral Tablet"|"70193"|"Localized Osteoarthritis Of The Knee"|"6"|"0.352941"  
"100274"|"TraMADol HCl 50 MG Oral Tablet"|"70196"|"Generalized Osteoarthritis"|"3"|"0.333333"  
"100274"|"TraMADol HCl 50 MG Oral Tablet"|"70219"|"Osteoarthritis Of The Knee"|"13"|"0.393939"  
"100274"|"TraMADol HCl 50 MG Oral Tablet"|"70221"|"Osteoarthritis Of Multiple Sites"|"9"|"0.6"  
"100274"|"TraMADol HCl 50 MG Oral Tablet"|"70382"|"Arthropathy Of Multiple Sites"|"4"|"0.5"  
"100274"|"TraMADol HCl 50 MG Oral Tablet"|"70384"|"Gout"|"4"|"0.148148"  
"100274"|"TraMADol HCl 50 MG Oral Tablet"|"70388"|"Chronic Tophaceous Gout"|"2"|"0.666667"  
"100274"|"TraMADol HCl 50 MG Oral Tablet"|"70455"|"Rheumatoid Arthritis"|"52"|"0.611765"  
"100274"|"TraMADol HCl 50 MG Oral Tablet"|"70472"|"Systemic Lupus Erythematosus"|"21"|"0.466667"  
"100274"|"TraMADol HCl 50 MG Oral Tablet"|"70475"|"Scleroderma"|"17"|"0.566667"  
"100274"|"TraMADol HCl 50 MG Oral Tablet"|"70479"|"Sicca Syndrome"|"2"|"0.5"  
"100274"|"TraMADol HCl 50 MG Oral Tablet"|"70500"|"Polymyalgia Rheumatica"|"3"|"0.15"  
"100274"|"TraMADol HCl 50 MG Oral Tablet"|"70704"|"Symmetric Polyarticular Inflammation"|"2"|"0.25"  
"100274"|"TraMADol HCl 50 MG Oral Tablet"|"70706"|"Ankylosing Spondylitis"|"4"|"0.5"  
"100274"|"TraMADol HCl 50 MG Oral Tablet"|"70719"|"Psoriatic Arthropathy"|"4"|"0.5"  
"100274"|"TraMADol HCl 50 MG Oral Tablet"|"70721"|"Sacroiliitis"|"3"|"0.5"  
"100274"|"TraMADol HCl 50 MG Oral Tablet"|"70722"|"Spondylitis"|"2"|"0.5"  
"100274"|"TraMADol HCl 50 MG Oral Tablet"|"73450"|"Sprained Ribs"|"2"|"0.666667"  
"100274"|"TraMADol HCl 50 MG Oral Tablet"|"73454"|"Lumbar Sprain"|"2"|"0.5"  
"100274"|"TraMADol HCl 50 MG Oral Tablet"|"73458"|"Chronic Strained Lumbosacral Ligament"|"2"|"0.666667"  
"100274"|"TraMADol HCl 50 MG Oral Tablet"|"73464"|"Lower Back Sprain"|"3"|"0.3"  
"100274"|"TraMADol HCl 50 MG Oral Tablet"|"73551"|"Tendonitis"|"4"|"0.307692"  
"100274"|"TraMADol HCl 50 MG Oral Tablet"|"73578"|"Tendonitis Of The Achilles Tendon"|"2"|"0.666667"  
"100274"|"TraMADol HCl 50 MG Oral Tablet"|"73608"|"Subacromial Bursitis"|"2"|"0.222222"  
"100274"|"TraMADol HCl 50 MG Oral Tablet"|"73666"|"Backache"|"30"|"0.294118"  
"100274"|"TraMADol HCl 50 MG Oral Tablet"|"73671"|"Lumbar Disc Degeneration"|"2"|"0.4"  
"100274"|"TraMADol HCl 50 MG Oral Tablet"|"73698"|"Lumbar Spondylosis"|"3"|"0.375"  
"100274"|"TraMADol HCl 50 MG Oral Tablet"|"73700"|"Lumbar Spondylosis With Myelopathy"|"3"|"1"  
"100274"|"TraMADol HCl 50 MG Oral Tablet"|"74006"|"Avascular Necrosis"|"3"|"0.428571"  
"100274"|"TraMADol HCl 50 MG Oral Tablet"|"74530"|"Tension-type Headache"|"4"|"0.181818"  
"100274"|"TraMADol HCl 50 MG Oral Tablet"|"74534"|"Classic Migraine (With Aura)"|"3"|"0.142857"  
"100274"|"TraMADol HCl 50 MG Oral Tablet"|"75125"|"Multiple Sclerosis"|"7"|"0.225806"  
"100274"|"TraMADol HCl 50 MG Oral Tablet"|"75486"|"Trigeminal Neuralgia"|"2"|"0.25"  
"100274"|"TraMADol HCl 50 MG Oral Tablet"|"75579"|"Spondylosis Without Myelopathy"|"4"|"0.666667"  
"100274"|"TraMADol HCl 50 MG Oral Tablet"|"75601"|"Polyneuropathy"|"3"|"0.3"  
"100274"|"TraMADol HCl 50 MG Oral Tablet"|"75717"|"Cervicalgia"|"5"|"0.16129"  
"100274"|"TraMADol HCl 50 MG Oral Tablet"|"75728"|"Sciatica"|"5"|"0.217391"  
"100274"|"TraMADol HCl 50 MG Oral Tablet"|"75812"|"Myalgia And Myositis"|"11"|"0.314286"  
"100274"|"TraMADol HCl 50 MG Oral Tablet"|"76610"|"Chronic Pain Syndrome"|"4"|"0.235294"  
"100274"|"TraMADol HCl 50 MG Oral Tablet"|"76847"|"AIDS Polyneuropathy"|"2"|"0.666667"  
"100274"|"TraMADol HCl 50 MG Oral Tablet"|"85614"|"Joint Pain, Localized In The Hip"|"24"|"0.387097"  
"100274"|"TraMADol HCl 50 MG Oral Tablet"|"85623"|"Joint Pain, Localized In The Knee"|"39"|"0.375"  
"100274"|"TraMADol HCl 50 MG Oral Tablet"|"85638"|"Ankle Joint Pain"|"14"|"0.311111"  
"100274"|"TraMADol HCl 50 MG Oral Tablet"|"85644"|"Foot Pain (Soft Tissue)"|"6"|"0.214286"  
"100274"|"TraMADol HCl 50 MG Oral Tablet"|"85649"|"Joint Pain In The Toes"|"2"|"0.25"  
"100274"|"TraMADol HCl 50 MG Oral Tablet"|"85658"|"Diffuse Joint Pains (Arthralgias)"|"5"|"0.333333"  
"100274"|"TraMADol HCl 50 MG Oral Tablet"|"85660"|"Joint Pain Fingers"|"2"|"0.285714"  
"100274"|"TraMADol HCl 50 MG Oral Tablet"|"85673"|"Joint Pain, Localized In The Wrist"|"3"|"0.333333"  
"100274"|"TraMADol HCl 50 MG Oral Tablet"|"85701"|"Joint Pain, Localized In The Shoulder"|"11"|"0.23913"

"100274"|"TraMADol HCl 50 MG Oral Tablet"|"90945"|"Joint Pain, Localized In The Right Shoulder"|"7"|"0.583333"  
"100274"|"TraMADol HCl 50 MG Oral Tablet"|"90952"|"Joint Pain, Localized In The Left Shoulder"|"2"|"0.285714"  
"100274"|"TraMADol HCl 50 MG Oral Tablet"|"91079"|"Midback Pain"|"8"|"0.571429"  
"100274"|"TraMADol HCl 50 MG Oral Tablet"|"91089"|"Lower Back Pain"|"60"|"0.397351"  
"100274"|"TraMADol HCl 50 MG Oral Tablet"|"91115"|"Lower Back Pain Chronic"|"2"|"0.285714"  
"100274"|"TraMADol HCl 50 MG Oral Tablet"|"92472"|"Muscle Aches, Generalized (Myalgias)"|"2"|"0.4"  
"100274"|"TraMADol HCl 50 MG Oral Tablet"|"163669"|"Drowsy"|"2"|"0.4"  
"100274"|"TraMADol HCl 50 MG Oral Tablet"|"168811"|"Traumatic Arthritis Of The Ankle"|"3"|"0.75"  
"100274"|"TraMADol HCl 50 MG Oral Tablet"|"173419"|"Cervical Radiculopathy"|"4"|"0.266667"  
"100274"|"TraMADol HCl 50 MG Oral Tablet"|"173442"|"Lumbar Radiculopathy"|"3"|"0.130435"  
"100274"|"TraMADol HCl 50 MG Oral Tablet"|"251467"|"Limb Pain"|"34"|"0.395349"  
"100274"|"TraMADol HCl 50 MG Oral Tablet"|"252625"|"Diabetic Polyneuropathy"|"2"|"0.4"  
"100274"|"TraMADol HCl 50 MG Oral Tablet"|"257996"|"Arthritis"|"26"|"0.192593"  
"100274"|"TraMADol HCl 50 MG Oral Tablet"|"274672"|"Chronic Kidney Disease, Stage 4"|"3"|"0.3"  
"100274"|"TraMADol HCl 50 MG Oral Tablet"|"278685"|"Arthralgias In Multiple Sites"|"12"|"0.461538"  
"100274"|"TraMADol HCl 50 MG Oral Tablet"|"278691"|"Lumbar Facet Syndrome"|"2"|"0.4"  
"100274"|"TraMADol HCl 50 MG Oral Tablet"|"282272"|"Anterior Wall Chest Pain With Respiration"|"2"|"0.285714"  
"100274"|"TraMADol HCl 50 MG Oral Tablet"|"288918"|"Acute Pain"|"2"|"1"  
"100274"|"TraMADol HCl 50 MG Oral Tablet"|"288921"|"Chronic Pain"|"19"|"0.395833"  
"100274"|"TraMADol HCl 50 MG Oral Tablet"|"288977"|"Fibromyalgia"|"15"|"0.3125"  
"100274"|"TraMADol HCl 50 MG Oral Tablet"|"292512"|"Piriformis Syndrome"|"2"|"0.25"  
"100275"|"MetFORMIN HCl 850 MG Oral Tablet"|"69380"|"Diabetes Mellitus"|"25"|"0.480769"  
"100275"|"MetFORMIN HCl 850 MG Oral Tablet"|"69381"|"Type II Diabetes Mellitus"|"7"|"0.259259"  
"100275"|"MetFORMIN HCl 850 MG Oral Tablet"|"69382"|"Type II Diabetes Mellitus - Uncomplicated, Uncontrolled"|"3"|"0.428571"  
"100275"|"MetFORMIN HCl 850 MG Oral Tablet"|"69402"|"Diabetes Mellitus Poorly Controlled"|"4"|"0.333333"  
"100276"|"TiZANidine HCl 2 MG Oral Tablet"|"75125"|"Multiple Sclerosis"|"6"|"0.461538"  
"100276"|"TiZANidine HCl 2 MG Oral Tablet"|"91089"|"Lower Back Pain"|"2"|"0.333333"  
"100276"|"TiZANidine HCl 2 MG Oral Tablet"|"288921"|"Chronic Pain"|"2"|"0.333333"  
"100277"|"TiZANidine HCl 4 MG Oral Tablet"|"31947"|"Lumbago"|"3"|"0.375"  
"100277"|"TiZANidine HCl 4 MG Oral Tablet"|"70455"|"Rheumatoid Arthritis"|"2"|"0.666667"  
"100277"|"TiZANidine HCl 4 MG Oral Tablet"|"75125"|"Multiple Sclerosis"|"6"|"0.5"  
"100277"|"TiZANidine HCl 4 MG Oral Tablet"|"75579"|"Spondylosis Without Myelopathy"|"2"|"1"  
"100277"|"TiZANidine HCl 4 MG Oral Tablet"|"85691"|"Neck Pain"|"2"|"0.4"  
"100277"|"TiZANidine HCl 4 MG Oral Tablet"|"91089"|"Lower Back Pain"|"4"|"0.266667"  
"100277"|"TiZANidine HCl 4 MG Oral Tablet"|"165488"|"Hemispasticity Of Left Side - (Nondominant Side)"|"2"|"0.666667"  
"100279"|"Chlorhexidine Gluconate 2 % External Liquid"|"70094"|"Skin Abscess Of The Buttocks"|"2"|"1"  
"100283"|"Torseamide 10 MG Oral Tablet"|"63467"|"Hypertension"|"2"|"0.333333"  
"100283"|"Torseamide 10 MG Oral Tablet"|"63470"|"Benign Essential Hypertension"|"3"|"0.6"  
"100284"|"Torseamide 20 MG Oral Tablet"|"63217"|"Congestive Heart Failure"|"3"|"0.2"  
"100284"|"Torseamide 20 MG Oral Tablet"|"63467"|"Hypertension"|"6"|"0.171429"  
"100284"|"Torseamide 20 MG Oral Tablet"|"63468"|"Essential Hypertension"|"3"|"0.176471"  
"100284"|"Torseamide 20 MG Oral Tablet"|"155099"|"Lower Leg Localized Swelling"|"2"|"1"  
"100284"|"Torseamide 20 MG Oral Tablet"|"250918"|"Chronic Systolic Congestive Heart Failure"|"2"|"1"  
"100284"|"Torseamide 20 MG Oral Tablet"|"282680"|"Edema"|"2"|"0.4"  
"100296"|"MetFORMIN HCl 1000 MG Oral Tablet"|"69380"|"Diabetes Mellitus"|"135"|"0.340909"  
"100296"|"MetFORMIN HCl 1000 MG Oral Tablet"|"69381"|"Type II Diabetes Mellitus"|"64"|"0.297674"  
"100296"|"MetFORMIN HCl 1000 MG Oral Tablet"|"69382"|"Type II Diabetes Mellitus - Uncomplicated, Uncontrolled"|"25"|"0.471698"  
"100296"|"MetFORMIN HCl 1000 MG Oral Tablet"|"69401"|"Diabetes Mellitus Under Control"|"10"|"0.625"  
"100296"|"MetFORMIN HCl 1000 MG Oral Tablet"|"69402"|"Diabetes Mellitus Poorly Controlled"|"74"|"0.521127"  
"100296"|"MetFORMIN HCl 1000 MG Oral Tablet"|"69461"|"Prediabetes"|"2"|"0.5"  
"100296"|"MetFORMIN HCl 1000 MG Oral Tablet"|"69549"|"Polycystic Ovarian Syndrome"|"5"|"0.217391"

"100296"|"MetFORMIN HCl 1000 MG Oral Tablet"|"80831"|"Adenocarcinoma Of The Prostate Gland"|"3"|"0.6"  
"100296"|"MetFORMIN HCl 1000 MG Oral Tablet"|"80847"|"Renal Cell Carcinoma"|"2"|"0.5"  
"100296"|"MetFORMIN HCl 1000 MG Oral Tablet"|"258942"|"Type II Diabetes Mellitus - Uncomplicated, Controlled"|"12"|"0.444444"  
"100296"|"MetFORMIN HCl 1000 MG Oral Tablet"|"260898"|"Kidney Cancer"|"3"|"0.6"  
"100296"|"MetFORMIN HCl 1000 MG Oral Tablet"|"278285"|"Abnormal Glucose"|"2"|"0.285714"  
"100296"|"MetFORMIN HCl 1000 MG Oral Tablet"|"278812"|"Prostate Cancer"|"5"|"0.238095"  
"100296"|"MetFORMIN HCl 1000 MG Oral Tablet"|"283296"|"Abnormal Weight Gain"|"3"|"0.214286"  
"100297"|"Lisinopril 30 MG Oral Tablet"|"63467"|"Hypertension"|"7"|"0.291667"  
"100297"|"Lisinopril 30 MG Oral Tablet"|"63468"|"Essential Hypertension"|"6"|"0.545455"  
"100297"|"Lisinopril 30 MG Oral Tablet"|"63470"|"Benign Essential Hypertension"|"5"|"0.5"  
"100298"|"Lisinopril-Hydrochlorothiazide 10-12.5 MG Oral Tablet"|"34588"|"Proteinuria"|"2"|"0.333333"  
"100298"|"Lisinopril-Hydrochlorothiazide 10-12.5 MG Oral Tablet"|"63467"|"Hypertension"|"80"|"0.430108"  
"100298"|"Lisinopril-Hydrochlorothiazide 10-12.5 MG Oral Tablet"|"63468"|"Essential Hypertension"|"39"|"0.47561"  
"100298"|"Lisinopril-Hydrochlorothiazide 10-12.5 MG Oral Tablet"|"63470"|"Benign Essential Hypertension"|"61"|"0.73494"  
"100298"|"Lisinopril-Hydrochlorothiazide 10-12.5 MG Oral Tablet"|"76835"|"HIV Infection"|"3"|"0.272727"  
"100298"|"Lisinopril-Hydrochlorothiazide 10-12.5 MG Oral Tablet"|"250579"|"Blood Pressure Isolated Elevated"|"5"|"0.217391"  
"100306"|"Nitroglycerin 0.1 MG/HR Transdermal Patch 24 Hour"|"63758"|"Raynaud's Disease"|"4"|"0.5"  
"100306"|"Nitroglycerin 0.1 MG/HR Transdermal Patch 24 Hour"|"69660"|"Chronic Cutaneous Ulcer"|"4"|"0.8"  
"100308"|"Nitroglycerin 0.4 MG/HR Transdermal Patch 24 Hour"|"62975"|"Coronary Artery Disease"|"3"|"0.3"  
"100311"|"Chlorhexidine Gluconate 4 % External Liquid"|"69968"|"Carbuncle"|"2"|"0.5"  
"100311"|"Chlorhexidine Gluconate 4 % External Liquid"|"70027"|"Folliculitis"|"2"|"0.285714"  
"100311"|"Chlorhexidine Gluconate 4 % External Liquid"|"291776"|"Vulvar Furuncle"|"2"|"1"  
"100317"|"Diltiazem HCl Coated Beads 120 MG Oral Capsule Extended Release 24 Hour"|"63467"|"Hypertension"|"2"|"0.2"  
"100317"|"Diltiazem HCl Coated Beads 120 MG Oral Capsule Extended Release 24 Hour"|"63468"|"Essential Hypertension"|"3"|"0.75"  
"100318"|"Diltiazem HCl Coated Beads 180 MG Oral Capsule Extended Release 24 Hour"|"62916"|"Atrial Fibrillation"|"4"|"0.5"  
"100318"|"Diltiazem HCl Coated Beads 180 MG Oral Capsule Extended Release 24 Hour"|"63468"|"Essential Hypertension"|"2"|"0.4"  
"100318"|"Diltiazem HCl Coated Beads 180 MG Oral Capsule Extended Release 24 Hour"|"63470"|"Benign Essential Hypertension"|"3"|"0.75"  
"100319"|"Diltiazem HCl Coated Beads 240 MG Oral Capsule Extended Release 24 Hour"|"63467"|"Hypertension"|"8"|"0.363636"  
"100319"|"Diltiazem HCl Coated Beads 240 MG Oral Capsule Extended Release 24 Hour"|"63468"|"Essential Hypertension"|"7"|"0.7"  
"100319"|"Diltiazem HCl Coated Beads 240 MG Oral Capsule Extended Release 24 Hour"|"63470"|"Benign Essential Hypertension"|"9"|"0.75"  
"100320"|"Diltiazem HCl Coated Beads 300 MG Oral Capsule Extended Release 24 Hour"|"63470"|"Benign Essential Hypertension"|"2"|"1"  
"100321"|"Diltiazem HCl CR 120 MG Oral Capsule Extended Release 24 Hour"|"62916"|"Atrial Fibrillation"|"4"|"0.444444"  
"100321"|"Diltiazem HCl CR 120 MG Oral Capsule Extended Release 24 Hour"|"63467"|"Hypertension"|"3"|"0.230769"  
"100321"|"Diltiazem HCl CR 120 MG Oral Capsule Extended Release 24 Hour"|"63468"|"Essential Hypertension"|"2"|"0.333333"  
"100321"|"Diltiazem HCl CR 120 MG Oral Capsule Extended Release 24 Hour"|"63470"|"Benign Essential Hypertension"|"3"|"0.5"  
"100322"|"Diltiazem HCl CR 180 MG Oral Capsule Extended Release 24 Hour"|"63468"|"Essential Hypertension"|"2"|"0.4"  
"100323"|"Diltiazem HCl CR 240 MG Oral Capsule Extended Release 24 Hour"|"63467"|"Hypertension"|"6"|"0.4"

"100323"|"Diltiazem HCl CR 240 MG Oral Capsule Extended Release 24 Hour"|"63468"|"Essential Hypertension"|"7"|"0.777778"  
"100340"|"Senna-S 8.6-50 MG Oral Tablet"|"166777"|"Constipation"|"3"|"1"  
"100357"|"Trelstar LA 11.25 MG Intramuscular Suspension Reconstituted"|"80830"|"Malignant Neoplasm Of The Prostate Gland"|"2"|"0.666667"  
"100378"|"Elidel 1 % External Cream"|"69753"|"Eczematoid Dermatitis"|"2"|"0.666667"  
"100378"|"Elidel 1 % External Cream"|"70112"|"Atopic Dermatitis"|"7"|"0.388889"  
"100378"|"Elidel 1 % External Cream"|"278350"|"Eczema"|"13"|"0.619048"  
"100416"|"MiraLax Oral Packet"|"166777"|"Constipation"|"2"|"0.222222"  
"100494"|"Sustiva 600 MG Oral Tablet"|"76835"|"HIV Infection"|"13"|"0.684211"  
"100502"|"Ventolin HFA 108 (90 Base) MCG/ACT Inhalation Aerosol Solution"|"60863"|"Difficulty Breathing (Dyspnea)"|"5"|"0.238095"  
"100502"|"Ventolin HFA 108 (90 Base) MCG/ACT Inhalation Aerosol Solution"|"60869"|"Cough"|"13"|"0.224138"  
"100502"|"Ventolin HFA 108 (90 Base) MCG/ACT Inhalation Aerosol Solution"|"60874"|"Wheezing"|"5"|"0.333333"  
"100502"|"Ventolin HFA 108 (90 Base) MCG/ACT Inhalation Aerosol Solution"|"64118"|"Acute Bronchitis"|"25"|"0.555556"  
"100502"|"Ventolin HFA 108 (90 Base) MCG/ACT Inhalation Aerosol Solution"|"64180"|"Reactive Airway Disease"|"15"|"0.555556"  
"100502"|"Ventolin HFA 108 (90 Base) MCG/ACT Inhalation Aerosol Solution"|"64181"|"Asthma"|"91"|"0.486631"  
"100502"|"Ventolin HFA 108 (90 Base) MCG/ACT Inhalation Aerosol Solution"|"64183"|"Mild Persistent Asthma"|"3"|"0.5"  
"100502"|"Ventolin HFA 108 (90 Base) MCG/ACT Inhalation Aerosol Solution"|"64184"|"Moderate Persistent Asthma"|"4"|"0.444444"  
"100502"|"Ventolin HFA 108 (90 Base) MCG/ACT Inhalation Aerosol Solution"|"64190"|"Exercise-induced Asthma"|"11"|"0.733333"  
"100502"|"Ventolin HFA 108 (90 Base) MCG/ACT Inhalation Aerosol Solution"|"64202"|"Bronchiolitis"|"9"|"0.642857"  
"100502"|"Ventolin HFA 108 (90 Base) MCG/ACT Inhalation Aerosol Solution"|"64205"|"Chronic Obstructive Pulmonary Disease"|"9"|"0.36"  
"100502"|"Ventolin HFA 108 (90 Base) MCG/ACT Inhalation Aerosol Solution"|"70620"|"Sarcoidosis"|"2"|"0.5"  
"100502"|"Ventolin HFA 108 (90 Base) MCG/ACT Inhalation Aerosol Solution"|"76702"|"Viral Infection"|"2"|"0.285714"  
"100502"|"Ventolin HFA 108 (90 Base) MCG/ACT Inhalation Aerosol Solution"|"77890"|"Upper Respiratory Infection"|"5"|"0.135135"  
"100502"|"Ventolin HFA 108 (90 Base) MCG/ACT Inhalation Aerosol Solution"|"87587"|"Coughing Up Sputum Yellow"|"3"|"0.75"  
"100502"|"Ventolin HFA 108 (90 Base) MCG/ACT Inhalation Aerosol Solution"|"166748"|"Asthma With Acute Exacerbation"|"2"|"0.222222"  
"100502"|"Ventolin HFA 108 (90 Base) MCG/ACT Inhalation Aerosol Solution"|"247012"|"Shortness Of Breath"|"4"|"0.307692"  
"100502"|"Ventolin HFA 108 (90 Base) MCG/ACT Inhalation Aerosol Solution"|"258835"|"Bronchitis"|"5"|"0.384615"  
"100502"|"Ventolin HFA 108 (90 Base) MCG/ACT Inhalation Aerosol Solution"|"277876"|"Lobar Pneumonia"|"2"|"0.5"  
"100502"|"Ventolin HFA 108 (90 Base) MCG/ACT Inhalation Aerosol Solution"|"277885"|"Bronchospasm"|"2"|"0.666667"  
"100502"|"Ventolin HFA 108 (90 Base) MCG/ACT Inhalation Aerosol Solution"|"297031"|"Intermittent Asthma"|"7"|"0.538462"  
"100517"|"Clindamycin Phosphate 1 % External Lotion"|"69606"|"Acne"|"5"|"1"  
"100517"|"Clindamycin Phosphate 1 % External Lotion"|"69607"|"Acne Vulgaris"|"2"|"0.666667"  
"100545"|"Flunisolide 0.025 % Nasal Solution"|"62598"|"Allergic Rhinitis"|"18"|"0.666667"  
"100557"|"Xopenex 0.31 MG/3ML Inhalation Nebulization Solution"|"64180"|"Reactive Airway Disease"|"3"|"0.6"  
"100557"|"Xopenex 0.31 MG/3ML Inhalation Nebulization Solution"|"64181"|"Asthma"|"4"|"0.363636"  
"100600"|"Rebif 22 MCG/0.5ML Subcutaneous Solution"|"75125"|"Multiple Sclerosis"|"3"|"0.375"  
"100601"|"Rebif 44 MCG/0.5ML Subcutaneous Solution"|"75125"|"Multiple Sclerosis"|"15"|"0.333333"

"100613"|"Ortho Evra 150-20 MCG/24HR Transdermal Patch Weekly"|"66133"|"Dysmenorrhea"|"2"|"0.666667"  
"100613"|"Ortho Evra 150-20 MCG/24HR Transdermal Patch Weekly"|"187792"|"Gynecologic Services Contraceptive Management"|"8"|"0.571429"  
"100613"|"Ortho Evra 150-20 MCG/24HR Transdermal Patch Weekly"|"187795"|"Gynecologic Services Prescription Of Contraceptive Agents"|"2"|"1"  
"100613"|"Ortho Evra 150-20 MCG/24HR Transdermal Patch Weekly"|"250996"|"Contraceptives"|"5"|"0.833333"  
"100625"|"Coenzyme Q10 30 MG/5ML Oral Liquid"|"257912"|"Disorder Of Mitochondrial Metabolism"|"11"|"0.733333"  
"100722"|"Concerta 27 MG Oral Tablet Extended Release"|"75818"|"Attention-deficit Hyperactivity Disorder"|"12"|"0.521739"  
"100722"|"Concerta 27 MG Oral Tablet Extended Release"|"75819"|"ADHD, Predominantly Inattentive Type"|"3"|"1"  
"100722"|"Concerta 27 MG Oral Tablet Extended Release"|"75820"|"ATTENTION-DEFICIT DISORDER WITH HYPERACTIVITY"|"2"|"1"  
"100722"|"Concerta 27 MG Oral Tablet Extended Release"|"275486"|"ADHD, Combined Type"|"13"|"0.764706"  
"100722"|"Concerta 27 MG Oral Tablet Extended Release"|"275492"|"ADHD, Predominantly Hyperactive - Impulsive"|"2"|"0.5"  
"100745"|"Kariva 0.15-0.02/0.01 MG (21/5) Oral Tablet"|"66016"|"Oligomenorrhea"|"2"|"1"  
"100745"|"Kariva 0.15-0.02/0.01 MG (21/5) Oral Tablet"|"69194"|"Endocrine Disorder"|"2"|"1"  
"100745"|"Kariva 0.15-0.02/0.01 MG (21/5) Oral Tablet"|"69549"|"Polycystic Ovarian Syndrome"|"7"|"0.583333"  
"100745"|"Kariva 0.15-0.02/0.01 MG (21/5) Oral Tablet"|"187792"|"Gynecologic Services Contraceptive Management"|"6"|"0.75"  
"100762"|"Diovan HCT 160-25 MG Oral Tablet"|"63467"|"Hypertension"|"28"|"0.341463"  
"100762"|"Diovan HCT 160-25 MG Oral Tablet"|"63468"|"Essential Hypertension"|"21"|"0.456522"  
"100762"|"Diovan HCT 160-25 MG Oral Tablet"|"63470"|"Benign Essential Hypertension"|"27"|"0.642857"  
"100799"|"Benicar 5 MG Oral Tablet"|"63467"|"Hypertension"|"3"|"0.333333"  
"100799"|"Benicar 5 MG Oral Tablet"|"63468"|"Essential Hypertension"|"3"|"0.6"  
"100799"|"Benicar 5 MG Oral Tablet"|"63470"|"Benign Essential Hypertension"|"3"|"0.5"  
"100800"|"Benicar 20 MG Oral Tablet"|"62975"|"Coronary Artery Disease"|"4"|"0.125"  
"100800"|"Benicar 20 MG Oral Tablet"|"63467"|"Hypertension"|"36"|"0.375"  
"100800"|"Benicar 20 MG Oral Tablet"|"63468"|"Essential Hypertension"|"11"|"0.37931"  
"100800"|"Benicar 20 MG Oral Tablet"|"63470"|"Benign Essential Hypertension"|"20"|"0.645161"  
"100801"|"Benicar 40 MG Oral Tablet"|"63467"|"Hypertension"|"47"|"0.415929"  
"100801"|"Benicar 40 MG Oral Tablet"|"63468"|"Essential Hypertension"|"26"|"0.541667"  
"100801"|"Benicar 40 MG Oral Tablet"|"63470"|"Benign Essential Hypertension"|"10"|"0.555556"  
"100818"|"Copaxone 20 MG/ML Subcutaneous Kit"|"75124"|"Demyelinating Disorders"|"5"|"0.357143"  
"100818"|"Copaxone 20 MG/ML Subcutaneous Kit"|"75125"|"Multiple Sclerosis"|"46"|"0.484211"  
"100830"|"Miconazole Nitrate 100 MG Vaginal Suppository"|"77211"|"Vaginal Candidiasis"|"2"|"1"  
"100841"|"Tev-Tropin 5 MG Subcutaneous Solution Reconstituted"|"98853"|"Short Stature (On Exam)"|"2"|"0.5"  
"100841"|"Tev-Tropin 5 MG Subcutaneous Solution Reconstituted"|"292025"|"Short Stature"|"3"|"1"  
"100890"|"Actonel 35 MG Oral Tablet"|"69340"|"Osteopenia"|"19"|"0.44186"  
"100890"|"Actonel 35 MG Oral Tablet"|"69341"|"Osteoporosis"|"33"|"0.532258"  
"100890"|"Actonel 35 MG Oral Tablet"|"69342"|"Postmenopausal Osteoporosis"|"2"|"0.5"  
"100890"|"Actonel 35 MG Oral Tablet"|"69343"|"Osteoporosis Senile"|"2"|"1"  
"100945"|"Retin-A Micro 0.04 % External Gel"|"69606"|"Acne"|"3"|"0.6"  
"100971"|"Adderall XR 5 MG Oral Capsule Extended Release 24 Hour"|"75818"|"Attention-deficit Hyperactivity Disorder"|"4"|"0.666667"  
"100971"|"Adderall XR 5 MG Oral Capsule Extended Release 24 Hour"|"275486"|"ADHD, Combined Type"|"7"|"1"  
"100972"|"Adderall XR 15 MG Oral Capsule Extended Release 24 Hour"|"75818"|"Attention-deficit Hyperactivity Disorder"|"4"|"1"  
"100972"|"Adderall XR 15 MG Oral Capsule Extended Release 24 Hour"|"275486"|"ADHD, Combined Type"|"5"|"1"  
"100972"|"Adderall XR 15 MG Oral Capsule Extended Release 24 Hour"|"291687"|"Attention Deficit Disorder Without Hyperactivity"|"2"|"0.666667"  
"100973"|"Adderall XR 25 MG Oral Capsule Extended Release 24 Hour"|"75818"|"Attention-deficit Hyperactivity Disorder"|"3"|"0.375"

"100973"|"Adderall XR 25 MG Oral Capsule Extended Release 24 Hour"|"275486"|"ADHD, Combined Type"|"2"|"0.4"

"101012"|"Nutropin AQ Pen 10 MG/2ML Subcutaneous Solution"|"67687"|"Growth Hormone Deficiency (Pituitary Dwarfism)"|"4"|"0.571429"

"101012"|"Nutropin AQ Pen 10 MG/2ML Subcutaneous Solution"|"69214"|"Hypopituitarism"|"2"|"0.5"

"101012"|"Nutropin AQ Pen 10 MG/2ML Subcutaneous Solution"|"292025"|"Short Stature"|"3"|"0.5"

"101025"|"NuvaRing 0.12-0.015 MG/24HR Vaginal Ring"|"66070"|"Menorrhagia"|"2"|"0.666667"

"101025"|"NuvaRing 0.12-0.015 MG/24HR Vaginal Ring"|"69549"|"Polycystic Ovarian Syndrome"|"4"|"0.444444"

"101025"|"NuvaRing 0.12-0.015 MG/24HR Vaginal Ring"|"98416"|"Birth Control Method"|"4"|"0.8"

"101025"|"NuvaRing 0.12-0.015 MG/24HR Vaginal Ring"|"187792"|"Gynecologic Services Contraceptive Management"|"56"|"0.727273"

"101025"|"NuvaRing 0.12-0.015 MG/24HR Vaginal Ring"|"187793"|"Gynecologic Services Contraceptive General Counseling"|"4"|"0.285714"

"101025"|"NuvaRing 0.12-0.015 MG/24HR Vaginal Ring"|"187795"|"Gynecologic Services Prescription Of Contraceptive Agents"|"10"|"0.909091"

"101025"|"NuvaRing 0.12-0.015 MG/24HR Vaginal Ring"|"250989"|"Oral Contraceptives"|"6"|"0.75"

"101025"|"NuvaRing 0.12-0.015 MG/24HR Vaginal Ring"|"250996"|"Contraceptives"|"7"|"1"

"101025"|"NuvaRing 0.12-0.015 MG/24HR Vaginal Ring"|"298824"|"Birth Control Method - Contraceptive Vaginal Ring"|"4"|"0.666667"

"101117"|"Ritalin LA 20 MG Oral Capsule Extended Release 24 Hour"|"75818"|"Attention-deficit Hyperactivity Disorder"|"2"|"0.666667"

"101120"|"Amoxicillin-Pot Clavulanate 200-28.5 MG Oral Tablet Chewable"|"64181"|"Asthma"|"2"|"0.666667"

"101121"|"Amoxicillin-Pot Clavulanate 400-57 MG Oral Tablet Chewable"|"62578"|"Acute Sinusitis"|"2"|"1"

"101121"|"Amoxicillin-Pot Clavulanate 400-57 MG Oral Tablet Chewable"|"64181"|"Asthma"|"4"|"0.285714"

"101121"|"Amoxicillin-Pot Clavulanate 400-57 MG Oral Tablet Chewable"|"251528"|"Acute Otitis Media"|"2"|"0.666667"

"101122"|"Amoxicillin-Pot Clavulanate 500-125 MG Oral Tablet"|"62355"|"Acute Mucooid Otitis Media"|"2"|"1"

"101122"|"Amoxicillin-Pot Clavulanate 500-125 MG Oral Tablet"|"62365"|"Acute Nonsuppurative Otitis Media"|"3"|"0.428571"

"101122"|"Amoxicillin-Pot Clavulanate 500-125 MG Oral Tablet"|"62403"|"Otitis Media Of The Left Ear"|"2"|"1"

"101122"|"Amoxicillin-Pot Clavulanate 500-125 MG Oral Tablet"|"62577"|"Sinusitis"|"9"|"0.5"

"101122"|"Amoxicillin-Pot Clavulanate 500-125 MG Oral Tablet"|"62578"|"Acute Sinusitis"|"37"|"0.552239"

"101122"|"Amoxicillin-Pot Clavulanate 500-125 MG Oral Tablet"|"62580"|"Acute Maxillary Sinusitis"|"3"|"0.5"

"101122"|"Amoxicillin-Pot Clavulanate 500-125 MG Oral Tablet"|"62585"|"Chronic Sinusitis"|"4"|"0.5"

"101122"|"Amoxicillin-Pot Clavulanate 500-125 MG Oral Tablet"|"62614"|"Deviated Nasal Septum (Acquired)"|"2"|"0.25"

"101122"|"Amoxicillin-Pot Clavulanate 500-125 MG Oral Tablet"|"62760"|"Acute Pharyngitis"|"8"|"0.5"

"101122"|"Amoxicillin-Pot Clavulanate 500-125 MG Oral Tablet"|"64118"|"Acute Bronchitis"|"3"|"0.15"

"101122"|"Amoxicillin-Pot Clavulanate 500-125 MG Oral Tablet"|"65762"|"Urinary Tract Infection"|"33"|"0.66"

"101122"|"Amoxicillin-Pot Clavulanate 500-125 MG Oral Tablet"|"69999"|"Cellulitis"|"3"|"0.375"

"101122"|"Amoxicillin-Pot Clavulanate 500-125 MG Oral Tablet"|"77891"|"Acute Upper Respiratory Infection"|"9"|"0.18"

"101122"|"Amoxicillin-Pot Clavulanate 500-125 MG Oral Tablet"|"251528"|"Acute Otitis Media"|"4"|"0.25"

"101122"|"Amoxicillin-Pot Clavulanate 500-125 MG Oral Tablet"|"274516"|"Acute Pharyngitis Streptococcus"|"2"|"0.5"

"101123"|"Amoxicillin-Pot Clavulanate 875-125 MG Oral Tablet"|"60832"|"Facial Pain"|"3"|"0.375"

"101123"|"Amoxicillin-Pot Clavulanate 875-125 MG Oral Tablet"|"60869"|"Cough"|"12"|"0.166667"

"101123"|"Amoxicillin-Pot Clavulanate 875-125 MG Oral Tablet"|"62343"|"Otitis Media"|"3"|"0.214286"

"101123"|"Amoxicillin-Pot Clavulanate 875-125 MG Oral Tablet"|"62344"|"Acute Suppurative Otitis Media"|"5"|"1"

"101123"|"Amoxicillin-Pot Clavulanate 875-125 MG Oral Tablet"|"62345"|"Acute Suppurative Otitis Media With Spontaneous Rupture Of The Ear Drum"|"3"|"0.75"

"101123"|"Amoxicillin-Pot Clavulanate 875-125 MG Oral Tablet"|"62348"|"Acute Suppurative Otitis Media Of The Left Ear"|"3"|"0.75"

"101123"|"Amoxicillin-Pot Clavulanate 875-125 MG Oral Tablet"|"62350"|"Acute Serous Otitis Media"|"6"|"0.6"

"101123"|"Amoxicillin-Pot Clavulanate 875-125 MG Oral Tablet"|"62352"|"Acute Serous Otitis Media Of The Right Ear"|"4"|"0.8"

"101123"|"Amoxicillin-Pot Clavulanate 875-125 MG Oral Tablet"|"62353"|"Acute Serous Otitis Media Of The Left Ear"|"5"|"0.714286"

"101123"|"Amoxicillin-Pot Clavulanate 875-125 MG Oral Tablet"|"62365"|"Acute Nonsuppurative Otitis Media"|"4"|"0.666667"

"101123"|"Amoxicillin-Pot Clavulanate 875-125 MG Oral Tablet"|"62403"|"Otitis Media Of The Left Ear"|"2"|"0.5"

"101123"|"Amoxicillin-Pot Clavulanate 875-125 MG Oral Tablet"|"62577"|"Sinusitis"|"19"|"0.44186"

"101123"|"Amoxicillin-Pot Clavulanate 875-125 MG Oral Tablet"|"62578"|"Acute Sinusitis"|"121"|"0.650538"

"101123"|"Amoxicillin-Pot Clavulanate 875-125 MG Oral Tablet"|"62580"|"Acute Maxillary Sinusitis"|"20"|"0.625"

"101123"|"Amoxicillin-Pot Clavulanate 875-125 MG Oral Tablet"|"62581"|"Acute Frontal Sinusitis"|"3"|"0.428571"

"101123"|"Amoxicillin-Pot Clavulanate 875-125 MG Oral Tablet"|"62585"|"Chronic Sinusitis"|"16"|"0.410256"

"101123"|"Amoxicillin-Pot Clavulanate 875-125 MG Oral Tablet"|"62586"|"Chronic Maxillary Sinusitis"|"33"|"0.354839"

"101123"|"Amoxicillin-Pot Clavulanate 875-125 MG Oral Tablet"|"62587"|"Chronic Frontal Sinusitis"|"13"|"0.213115"

"101123"|"Amoxicillin-Pot Clavulanate 875-125 MG Oral Tablet"|"62588"|"Chronic Ethmoidal Sinusitis"|"47"|"0.505376"

"101123"|"Amoxicillin-Pot Clavulanate 875-125 MG Oral Tablet"|"62591"|"Nasal Polyps"|"9"|"0.321429"

"101123"|"Amoxicillin-Pot Clavulanate 875-125 MG Oral Tablet"|"62597"|"Rhinitis"|"3"|"0.333333"

"101123"|"Amoxicillin-Pot Clavulanate 875-125 MG Oral Tablet"|"62732"|"Tonsillitis"|"2"|"0.4"

"101123"|"Amoxicillin-Pot Clavulanate 875-125 MG Oral Tablet"|"62733"|"Acute Tonsillitis"|"5"|"0.625"

"101123"|"Amoxicillin-Pot Clavulanate 875-125 MG Oral Tablet"|"62743"|"Chronic Tonsillitis"|"4"|"0.5"

"101123"|"Amoxicillin-Pot Clavulanate 875-125 MG Oral Tablet"|"62745"|"Tonsillar Hypertrophy"|"2"|"0.285714"

"101123"|"Amoxicillin-Pot Clavulanate 875-125 MG Oral Tablet"|"62759"|"Pharyngitis"|"7"|"0.411765"

"101123"|"Amoxicillin-Pot Clavulanate 875-125 MG Oral Tablet"|"62760"|"Acute Pharyngitis"|"27"|"0.6"

"101123"|"Amoxicillin-Pot Clavulanate 875-125 MG Oral Tablet"|"62761"|"Group A Streptococcus: B Hemolytic Pharyngitis"|"2"|"0.5"

"101123"|"Amoxicillin-Pot Clavulanate 875-125 MG Oral Tablet"|"64118"|"Acute Bronchitis"|"7"|"0.145833"

"101123"|"Amoxicillin-Pot Clavulanate 875-125 MG Oral Tablet"|"65762"|"Urinary Tract Infection"|"14"|"0.341463"

"101123"|"Amoxicillin-Pot Clavulanate 875-125 MG Oral Tablet"|"69999"|"Cellulitis"|"7"|"0.4375"

"101123"|"Amoxicillin-Pot Clavulanate 875-125 MG Oral Tablet"|"71075"|"Fracture Of Facial Bones"|"3"|"0.6"

"101123"|"Amoxicillin-Pot Clavulanate 875-125 MG Oral Tablet"|"74585"|"Cerebrospinal Fluid Rhinorrhea"|"2"|"0.4"

"101123"|"Amoxicillin-Pot Clavulanate 875-125 MG Oral Tablet"|"75487"|"Atypical Face Pain"|"4"|"0.235294"

"101123"|"Amoxicillin-Pot Clavulanate 875-125 MG Oral Tablet"|"77890"|"Upper Respiratory Infection"|"13"|"0.254902"

"101123"|"Amoxicillin-Pot Clavulanate 875-125 MG Oral Tablet"|"77891"|"Acute Upper Respiratory Infection"|"21"|"0.228261"

"101123"|"Amoxicillin-Pot Clavulanate 875-125 MG Oral Tablet"|"81224"|"Malignant Neoplasm Of The Head, Face, Or Neck"|"2"|"1"

"101123"|"Amoxicillin-Pot Clavulanate 875-125 MG Oral Tablet"|"85696"|"Lump Or Swelling In The Neck"|"2"|"1"

"101123"|"Amoxicillin-Pot Clavulanate 875-125 MG Oral Tablet"|"110813"|"Lymph Nodes Enlarged"|"2"|"0.4"

"101123"|"Amoxicillin-Pot Clavulanate 875-125 MG Oral Tablet"|"166549"|"Acute Streptococcal Tonsillitis"|"3"|"1"

"101123"|"Amoxicillin-Pot Clavulanate 875-125 MG Oral Tablet"|"168577"|"Ingrowing Toenail"|"2"|"0.4"

"101123"|"Amoxicillin-Pot Clavulanate 875-125 MG Oral Tablet"|"196605"|"Rapid Bacterial Antigen Ident Kit Streptococcus Group B"|"2"|"1"

"101123"|"Amoxicillin-Pot Clavulanate 875-125 MG Oral Tablet"|"250613"|"Fever (On Exam)"|"2"|"0.666667"

"101123"|"Amoxicillin-Pot Clavulanate 875-125 MG Oral Tablet"|"251528"|"Acute Otitis Media"|"14"|"0.56"

"101123"|"Amoxicillin-Pot Clavulanate 875-125 MG Oral Tablet"|"251575"|"Streptococcal Sore Throat"|"12"|"0.666667"

"101123"|"Amoxicillin-Pot Clavulanate 875-125 MG Oral Tablet"|"274445"|"Chronic Otitis Externa"|"2"|"0.4"

"101123"|"Amoxicillin-Pot Clavulanate 875-125 MG Oral Tablet"|"274516"|"Acute Pharyngitis Streptococcus"|"11"|"0.647059"

"101123"|"Amoxicillin-Pot Clavulanate 875-125 MG Oral Tablet"|"274533"|"Sore Throat"|"3"|"0.333333"

"101123"|"Amoxicillin-Pot Clavulanate 875-125 MG Oral Tablet"|"274534"|"Acute Sore Throat"|"7"|"0.304348"  
"101123"|"Amoxicillin-Pot Clavulanate 875-125 MG Oral Tablet"|"282676"|"Lymphadenopathy"|"4"|"0.444444"  
"101124"|"Amoxicillin-Pot Clavulanate 200-28.5 MG/5ML Oral Suspension Reconstituted"|"251528"|"Acute Otitis Media"|"2"|"0.5"  
"101125"|"Amoxicillin-Pot Clavulanate 400-57 MG/5ML Oral Suspension Reconstituted"|"62344"|"Acute Suppurative Otitis Media"|"3"|"0.75"  
"101125"|"Amoxicillin-Pot Clavulanate 400-57 MG/5ML Oral Suspension Reconstituted"|"62577"|"Sinusitis"|"5"|"0.625"  
"101125"|"Amoxicillin-Pot Clavulanate 400-57 MG/5ML Oral Suspension Reconstituted"|"62578"|"Acute Sinusitis"|"4"|"0.363636"  
"101125"|"Amoxicillin-Pot Clavulanate 400-57 MG/5ML Oral Suspension Reconstituted"|"251528"|"Acute Otitis Media"|"16"|"0.592593"  
"101185"|"Vivelle-Dot 0.025 MG/24HR Transdermal Patch Biweekly"|"67803"|"Turner Syndrome"|"3"|"1"  
"101211"|"Adeks CHEW"|"67695"|"Cystic Fibrosis"|"5"|"0.714286"  
"101214"|"Senna-Docusate Sodium 8.6-50 MG Oral Tablet"|"65055"|"Chronic Constipation"|"7"|"0.875"  
"101214"|"Senna-Docusate Sodium 8.6-50 MG Oral Tablet"|"166777"|"Constipation"|"9"|"0.642857"  
"101226"|"Zithromax 500 MG Oral Tablet"|"76934"|"Chlamydial Infections"|"11"|"1"  
"101226"|"Zithromax 500 MG Oral Tablet"|"94409"|"Exposed To Gonorrhea"|"2"|"0.5"  
"101266"|"Cenestin 0.3 MG Oral Tablet"|"195794"|"Symptomatic Menopause"|"2"|"0.5"  
"101320"|"Lexapro 10 MG Oral Tablet"|"61118"|"Anxiety (Symptom)"|"46"|"0.464646"  
"101320"|"Lexapro 10 MG Oral Tablet"|"75080"|"Parkinson's Disease"|"8"|"0.222222"  
"101320"|"Lexapro 10 MG Oral Tablet"|"75929"|"Mood Disorder Due To General Medical Condition"|"3"|"1"  
"101320"|"Lexapro 10 MG Oral Tablet"|"75935"|"Anxiety Disorder Of Unknown (Axis III) Etiology"|"6"|"0.461538"  
"101320"|"Lexapro 10 MG Oral Tablet"|"76272"|"Schizoaffective Disorder"|"2"|"0.666667"  
"101320"|"Lexapro 10 MG Oral Tablet"|"76306"|"Episodic Mood Disorders"|"3"|"0.5"  
"101320"|"Lexapro 10 MG Oral Tablet"|"76307"|"Bipolar Disorder"|"3"|"0.2"  
"101320"|"Lexapro 10 MG Oral Tablet"|"76325"|"Bipolar I Disorder, Most Recent Episode, Mixed - Moderate"|"2"|"1"  
"101320"|"Lexapro 10 MG Oral Tablet"|"76351"|"Depression"|"163"|"0.5"  
"101320"|"Lexapro 10 MG Oral Tablet"|"76357"|"Major Depression, Recurrent"|"7"|"0.411765"  
"101320"|"Lexapro 10 MG Oral Tablet"|"76359"|"Major Depression, Recurrent With Melancholia"|"2"|"1"  
"101320"|"Lexapro 10 MG Oral Tablet"|"76361"|"Moderate Recurrent Major Depression"|"5"|"0.5"  
"101320"|"Lexapro 10 MG Oral Tablet"|"76363"|"Major Depression, Recurrent With Psychotic Features"|"2"|"1"  
"101320"|"Lexapro 10 MG Oral Tablet"|"76364"|"Recurrent Major Depression In Partial Remission"|"2"|"0.5"  
"101320"|"Lexapro 10 MG Oral Tablet"|"76366"|"Chronic Major Depression"|"3"|"0.75"  
"101320"|"Lexapro 10 MG Oral Tablet"|"76388"|"Bipolar Disorder NOS"|"6"|"0.5"  
"101320"|"Lexapro 10 MG Oral Tablet"|"76389"|"Atypical Depressive Disorder"|"3"|"0.333333"  
"101320"|"Lexapro 10 MG Oral Tablet"|"76536"|"Generalized Anxiety Disorder"|"12"|"0.461538"  
"101320"|"Lexapro 10 MG Oral Tablet"|"76537"|"Panic Disorder Without Agoraphobia"|"4"|"0.444444"  
"101320"|"Lexapro 10 MG Oral Tablet"|"76587"|"Anxiety Disorder NOS"|"16"|"0.421053"  
"101320"|"Lexapro 10 MG Oral Tablet"|"76680"|"Adjustment Disorder With Anxiety"|"6"|"0.428571"  
"101320"|"Lexapro 10 MG Oral Tablet"|"76681"|"Adjustment Disorder With Anxiety And Prolonged Depressed Mood"|"3"|"0.75"  
"101320"|"Lexapro 10 MG Oral Tablet"|"76682"|"Adjustment Disorder With Anxious Mood"|"2"|"0.5"  
"101320"|"Lexapro 10 MG Oral Tablet"|"196089"|"Adjustment Disorder With Anxiety And Depressed Mood"|"8"|"0.533333"  
"101320"|"Lexapro 10 MG Oral Tablet"|"275500"|"Cognitive Disorder"|"2"|"1"  
"101320"|"Lexapro 10 MG Oral Tablet"|"275526"|"Severe Recurrent Major Depression Without Psychotic Features"|"3"|"0.75"  
"101320"|"Lexapro 10 MG Oral Tablet"|"275592"|"Post-traumatic Stress Disorder"|"4"|"0.5"  
"101320"|"Lexapro 10 MG Oral Tablet"|"275604"|"Depression With Anxiety"|"14"|"0.666667"  
"101320"|"Lexapro 10 MG Oral Tablet"|"289876"|"Alzheimer's Disease With Behavioral Disturbance"|"2"|"0.333333"  
"101321"|"Lexapro 20 MG Oral Tablet"|"61118"|"Anxiety (Symptom)"|"11"|"0.261905"  
"101321"|"Lexapro 20 MG Oral Tablet"|"75080"|"Parkinson's Disease"|"3"|"0.2"  
"101321"|"Lexapro 20 MG Oral Tablet"|"76272"|"Schizoaffective Disorder"|"3"|"1"

"101321"|"Lexapro 20 MG Oral Tablet"|"76306"|"Episodic Mood Disorders"|"2"|"0.5"  
"101321"|"Lexapro 20 MG Oral Tablet"|"76307"|"Bipolar Disorder"|"2"|"0.222222"  
"101321"|"Lexapro 20 MG Oral Tablet"|"76325"|"Bipolar I Disorder, Most Recent Episode, Mixed - Moderate"|"2"|"1"  
"101321"|"Lexapro 20 MG Oral Tablet"|"76343"|"Bipolar I Disorder, Most Recent Episode, Depressed -  
Moderate"|"2"|"0.666667"  
"101321"|"Lexapro 20 MG Oral Tablet"|"76351"|"Depression"|"88"|"0.517647"  
"101321"|"Lexapro 20 MG Oral Tablet"|"76352"|"Major Depression, Single Episode"|"2"|"0.4"  
"101321"|"Lexapro 20 MG Oral Tablet"|"76357"|"Major Depression, Recurrent"|"9"|"0.642857"  
"101321"|"Lexapro 20 MG Oral Tablet"|"76361"|"Moderate Recurrent Major Depression"|"5"|"0.555556"  
"101321"|"Lexapro 20 MG Oral Tablet"|"76363"|"Major Depression, Recurrent With Psychotic Features"|"2"|"1"  
"101321"|"Lexapro 20 MG Oral Tablet"|"76366"|"Chronic Major Depression"|"2"|"0.333333"  
"101321"|"Lexapro 20 MG Oral Tablet"|"76383"|"Dysthymic Disorder"|"2"|"1"  
"101321"|"Lexapro 20 MG Oral Tablet"|"76388"|"Bipolar Disorder NOS"|"4"|"0.571429"  
"101321"|"Lexapro 20 MG Oral Tablet"|"76389"|"Atypical Depressive Disorder"|"2"|"0.333333"  
"101321"|"Lexapro 20 MG Oral Tablet"|"76536"|"Generalized Anxiety Disorder"|"9"|"0.45"  
"101321"|"Lexapro 20 MG Oral Tablet"|"76537"|"Panic Disorder Without Agoraphobia"|"4"|"0.363636"  
"101321"|"Lexapro 20 MG Oral Tablet"|"76587"|"Anxiety Disorder NOS"|"6"|"0.352941"  
"101321"|"Lexapro 20 MG Oral Tablet"|"76679"|"Adjustment Disorder"|"2"|"0.666667"  
"101321"|"Lexapro 20 MG Oral Tablet"|"76680"|"Adjustment Disorder With Anxiety"|"2"|"0.5"  
"101321"|"Lexapro 20 MG Oral Tablet"|"275526"|"Severe Recurrent Major Depression Without Psychotic  
Features"|"4"|"1"  
"101321"|"Lexapro 20 MG Oral Tablet"|"275592"|"Post-traumatic Stress Disorder"|"3"|"0.6"  
"101321"|"Lexapro 20 MG Oral Tablet"|"275604"|"Depression With Anxiety"|"7"|"0.777778"  
"101353"|"Diovan 40 MG Oral Tablet"|"34588"|"Proteinuria"|"2"|"0.4"  
"101353"|"Diovan 40 MG Oral Tablet"|"63467"|"Hypertension"|"15"|"0.357143"  
"101353"|"Diovan 40 MG Oral Tablet"|"63468"|"Essential Hypertension"|"5"|"0.454545"  
"101353"|"Diovan 40 MG Oral Tablet"|"63470"|"Benign Essential Hypertension"|"6"|"0.428571"  
"101357"|"SMZ-TMP DS 800-160 MG Oral Tablet"|"62578"|"Acute Sinusitis"|"2"|"0.5"  
"101357"|"SMZ-TMP DS 800-160 MG Oral Tablet"|"65762"|"Urinary Tract Infection"|"7"|"0.777778"  
"101357"|"SMZ-TMP DS 800-160 MG Oral Tablet"|"69968"|"Carbuncle"|"3"|"0.6"  
"101357"|"SMZ-TMP DS 800-160 MG Oral Tablet"|"69999"|"Cellulitis"|"2"|"0.4"  
"101357"|"SMZ-TMP DS 800-160 MG Oral Tablet"|"70027"|"Folliculitis"|"2"|"0.666667"  
"101357"|"SMZ-TMP DS 800-160 MG Oral Tablet"|"76835"|"HIV Infection"|"2"|"0.666667"  
"101367"|"Cortic-ND 10-10-1 MG/ML Otic Solution"|"251528"|"Acute Otitis Media"|"2"|"1"  
"101409"|"Synthroid 137 MCG Oral Tablet"|"69258"|"Hypothyroidism"|"15"|"0.555556"  
"101409"|"Synthroid 137 MCG Oral Tablet"|"69261"|"Postsurgical Primary Hypothyroidism"|"2"|"1"  
"101409"|"Synthroid 137 MCG Oral Tablet"|"69266"|"Congenital Hypothyroidism"|"3"|"1"  
"101441"|"Ortho Tri-Cyclen Lo 0.18/0.215/0.25 MG-25 MCG Oral Tablet"|"66070"|"Menorrhagia"|"2"|"0.4"  
"101441"|"Ortho Tri-Cyclen Lo 0.18/0.215/0.25 MG-25 MCG Oral Tablet"|"66133"|"Dysmenorrhea"|"5"|"0.555556"  
"101441"|"Ortho Tri-Cyclen Lo 0.18/0.215/0.25 MG-25 MCG Oral Tablet"|"69549"|"Polycystic Ovarian  
Syndrome"|"14"|"0.56"  
"101441"|"Ortho Tri-Cyclen Lo 0.18/0.215/0.25 MG-25 MCG Oral Tablet"|"69606"|"Acne"|"3"|"0.176471"  
"101441"|"Ortho Tri-Cyclen Lo 0.18/0.215/0.25 MG-25 MCG Oral Tablet"|"85949"|"Birth Control Method - Oral  
Contraceptives"|"2"|"0.666667"  
"101441"|"Ortho Tri-Cyclen Lo 0.18/0.215/0.25 MG-25 MCG Oral Tablet"|"88042"|"Irregular Length Of Menstrual  
Periods"|"3"|"0.6"  
"101441"|"Ortho Tri-Cyclen Lo 0.18/0.215/0.25 MG-25 MCG Oral Tablet"|"182924"|"Preventive Medicine New  
Patient Evaluation Adult 18-39"|"2"|"0.5"  
"101441"|"Ortho Tri-Cyclen Lo 0.18/0.215/0.25 MG-25 MCG Oral Tablet"|"187792"|"Gynecologic Services  
Contraceptive Management"|"20"|"0.689655"  
"101441"|"Ortho Tri-Cyclen Lo 0.18/0.215/0.25 MG-25 MCG Oral Tablet"|"250989"|"Oral  
Contraceptives"|"14"|"0.736842"  
"101441"|"Ortho Tri-Cyclen Lo 0.18/0.215/0.25 MG-25 MCG Oral Tablet"|"250996"|"Contraceptives"|"3"|"0.75"  
"101441"|"Ortho Tri-Cyclen Lo 0.18/0.215/0.25 MG-25 MCG Oral Tablet"|"279038"|"Inquiry And Counseling:"

Family Planning|"3|"0.6"  
"101452|"NovoLOG Mix 70/30 70-30 % Subcutaneous Suspension|"69380|"Diabetes Mellitus|"12|"0.48"  
"101452|"NovoLOG Mix 70/30 70-30 % Subcutaneous Suspension|"69402|"Diabetes Mellitus Poorly  
Controlled|"7|"0.636364"  
"101472|"Hematogen FA 200-250-0.01-1 MG Oral Capsule|"77962|"Anemia|"2|"1"  
"101505|"Saline 0.9 % Solution|"62598|"Allergic Rhinitis|"2|"0.333333"  
"101505|"Saline 0.9 % Solution|"64202|"Bronchiolitis|"2|"0.4"  
"101505|"Saline 0.9 % Solution|"87028|"Nasal Passage Blockage (Stuffiness)"|"4|"0.444444"  
"101566|"Sprintec 28 0.25-35 MG-MCG Oral Tablet|"66016|"Oligomenorrhea|"3|"1"  
"101566|"Sprintec 28 0.25-35 MG-MCG Oral Tablet|"66070|"Menorrhagia|"6|"0.75"  
"101566|"Sprintec 28 0.25-35 MG-MCG Oral Tablet|"66141|"Secondary Amenorrhea|"2|"0.666667"  
"101566|"Sprintec 28 0.25-35 MG-MCG Oral Tablet|"69549|"Polycystic Ovarian Syndrome|"2|"0.25"  
"101566|"Sprintec 28 0.25-35 MG-MCG Oral Tablet|"187795|"Gynecologic Services Prescription Of Contraceptive  
Agents|"2|"1"  
"101566|"Sprintec 28 0.25-35 MG-MCG Oral Tablet|"250989|"Oral Contraceptives|"5|"0.714286"  
"103814|"Econazole Nitrate 1 % External Cream|"69380|"Diabetes Mellitus|"5|"0.3125"  
"103814|"Econazole Nitrate 1 % External Cream|"69381|"Type II Diabetes Mellitus|"2|"0.222222"  
"103815|"Ethosuximide 250 MG Oral Capsule|"252552|"Generalized Convulsive Tonic-clonic Seizure With  
Intractable Seizure|"2|"1"  
"103815|"Ethosuximide 250 MG Oral Capsule|"297231|"Epilepsy|"2|"1"  
"103821|"Promethazine HCl 25 MG Rectal Suppository|"60894|"Nausea (Symptom)"|"2|"0.5"  
"103821|"Promethazine HCl 25 MG Rectal Suppository|"64579|"Gastroenteritis|"3|"0.75"  
"103821|"Promethazine HCl 25 MG Rectal Suppository|"66394|"Hyperemesis Gravidarum|"2|"1"  
"103821|"Promethazine HCl 25 MG Rectal Suppository|"87702|"Nausea With Vomiting|"8|"0.571429"  
"103838|"Omeprazole 20 MG Oral Capsule Delayed Release|"60886|"Difficulty Swallowing (Dysphagia)"|"3|"0.5"  
"103838|"Omeprazole 20 MG Oral Capsule Delayed Release|"60891|"Heartburn|"5|"0.555556"  
"103838|"Omeprazole 20 MG Oral Capsule Delayed Release|"60894|"Nausea (Symptom)"|"5|"0.357143"  
"103838|"Omeprazole 20 MG Oral Capsule Delayed Release|"60899|"Abdominal Pain|"6|"0.157895"  
"103838|"Omeprazole 20 MG Oral Capsule Delayed Release|"64231|"Tracheal Stenosis|"2|"0.666667"  
"103838|"Omeprazole 20 MG Oral Capsule Delayed Release|"64678|"Esophagitis|"2|"0.333333"  
"103838|"Omeprazole 20 MG Oral Capsule Delayed Release|"64680|"Chronic Reflux Esophagitis|"19|"0.475"  
"103838|"Omeprazole 20 MG Oral Capsule Delayed Release|"64688|"Esophageal Reflux|"133|"0.60181"  
"103838|"Omeprazole 20 MG Oral Capsule Delayed Release|"64763|"Gastritis|"12|"0.352941"  
"103838|"Omeprazole 20 MG Oral Capsule Delayed Release|"64764|"Gastritis Due To H. Pylori|"2|"0.5"  
"103838|"Omeprazole 20 MG Oral Capsule Delayed Release|"70455|"Rheumatoid Arthritis|"9|"0.375"  
"103838|"Omeprazole 20 MG Oral Capsule Delayed Release|"70475|"Scleroderma|"6|"0.428571"  
"103838|"Omeprazole 20 MG Oral Capsule Delayed Release|"75125|"Multiple Sclerosis|"3|"0.230769"  
"103838|"Omeprazole 20 MG Oral Capsule Delayed Release|"87736|"Abdominal Pain In The Central Upper Belly  
(Epigastric)"|"2|"0.333333"  
"103838|"Omeprazole 20 MG Oral Capsule Delayed Release|"116196|"Abdomen Tenderness Direct  
Epigastric|"2|"0.333333"  
"103838|"Omeprazole 20 MG Oral Capsule Delayed Release|"282704|"Acute Gastritis|"2|"0.25"  
"103838|"Omeprazole 20 MG Oral Capsule Delayed Release|"289114|"Laryngopharyngeal Reflux|"20|"0.909091"  
"103901|"Epivir 300 MG Oral Tablet|"76835|"HIV Infection|"6|"0.75"  
"103933|"Calcionate 1.8 GM/5ML Oral Syrup|"78154|"DiGeorge Syndrome|"2|"0.666667"  
"103947|"Avandamet 2-500 MG Oral Tablet|"69380|"Diabetes Mellitus|"3|"0.6"  
"104058|"Zetia 10 MG Oral Tablet|"62975|"Coronary Artery Disease|"14|"0.0909091"  
"104058|"Zetia 10 MG Oral Tablet|"62978|"Coronary Arteriosclerosis|"3|"0.176471"  
"104058|"Zetia 10 MG Oral Tablet|"67969|"Familial Combined Hyperlipidemia|"7|"0.466667"  
"104058|"Zetia 10 MG Oral Tablet|"67970|"Hyperlipidemia|"162|"0.554794"  
"104058|"Zetia 10 MG Oral Tablet|"67974|"Frederickson Type IIB Hyperlipidemia|"7|"0.636364"  
"104058|"Zetia 10 MG Oral Tablet|"68098|"Lipoid Metabolism Disorder|"3|"0.25"  
"104058|"Zetia 10 MG Oral Tablet|"247966|"Serum Total Cholesterol Was Elevated|"3|"0.333333"  
"104058|"Zetia 10 MG Oral Tablet|"283291|"Hypercholesterolemia|"4|"0.222222"

"104058"|"Zetia 10 MG Oral Tablet"|"283292"|"Essential Hypercholesterolemia"|"7"|"0.259259"  
"104058"|"Zetia 10 MG Oral Tablet"|"291485"|"Dyslipidemia"|"7"|"0.259259"  
"104099"|"Avodart 0.5 MG Oral Capsule"|"257887"|"Benign Prostatic Hyperplasia With Urinary  
Obstruction"|"2"|"0.666667"  
"104099"|"Avodart 0.5 MG Oral Capsule"|"289131"|"Benign Prostatic Hypertrophy"|"8"|"0.4"  
"104187"|"CeleBREX 400 MG Oral Capsule"|"278812"|"Prostate Cancer"|"2"|"1"  
"104197"|"Abilify 10 MG Oral Tablet"|"30250"|"Bipolar I Disorder, Most Recent Episode, Mixed"|"2"|"0.666667"  
"104197"|"Abilify 10 MG Oral Tablet"|"76212"|"Psychosis"|"5"|"0.833333"  
"104197"|"Abilify 10 MG Oral Tablet"|"76272"|"Schizoaffective Disorder"|"3"|"0.75"  
"104197"|"Abilify 10 MG Oral Tablet"|"76306"|"Episodic Mood Disorders"|"2"|"0.5"  
"104197"|"Abilify 10 MG Oral Tablet"|"76325"|"Bipolar I Disorder, Most Recent Episode, Mixed - Moderate"|"3"|"1"  
"104197"|"Abilify 10 MG Oral Tablet"|"76329"|"Bipolar I Disorder, Most Recent Episode, Mixed In Partial  
Remission"|"2"|"1"  
"104197"|"Abilify 10 MG Oral Tablet"|"76343"|"Bipolar I Disorder, Most Recent Episode, Depressed -  
Moderate"|"3"|"0.75"  
"104197"|"Abilify 10 MG Oral Tablet"|"76351"|"Depression"|"5"|"0.263158"  
"104197"|"Abilify 10 MG Oral Tablet"|"76357"|"Major Depression, Recurrent"|"3"|"0.6"  
"104197"|"Abilify 10 MG Oral Tablet"|"76363"|"Major Depression, Recurrent With Psychotic Features"|"3"|"1"  
"104197"|"Abilify 10 MG Oral Tablet"|"76388"|"Bipolar Disorder NOS"|"6"|"0.545455"  
"104198"|"Abilify 15 MG Oral Tablet"|"76272"|"Schizoaffective Disorder"|"2"|"0.5"  
"104198"|"Abilify 15 MG Oral Tablet"|"76276"|"Schizoaffective Disorder - Chronic (With Residual  
Symptoms)"|"2"|"1"  
"104198"|"Abilify 15 MG Oral Tablet"|"76329"|"Bipolar I Disorder, Most Recent Episode, Mixed In Partial  
Remission"|"2"|"1"  
"104198"|"Abilify 15 MG Oral Tablet"|"76351"|"Depression"|"2"|"0.5"  
"104198"|"Abilify 15 MG Oral Tablet"|"76388"|"Bipolar Disorder NOS"|"2"|"0.666667"  
"104199"|"Abilify 20 MG Oral Tablet"|"76232"|"Paranoid Schizophrenia"|"3"|"0.75"  
"104199"|"Abilify 20 MG Oral Tablet"|"76250"|"Residual Schizophrenia"|"2"|"1"  
"104199"|"Abilify 20 MG Oral Tablet"|"76329"|"Bipolar I Disorder, Most Recent Episode, Mixed In Partial  
Remission"|"2"|"1"  
"104200"|"Abilify 30 MG Oral Tablet"|"76245"|"Undifferentiated Schizophrenia"|"3"|"1"  
"104200"|"Abilify 30 MG Oral Tablet"|"76272"|"Schizoaffective Disorder"|"3"|"0.6"  
"104200"|"Abilify 30 MG Oral Tablet"|"76343"|"Bipolar I Disorder, Most Recent Episode, Depressed -  
Moderate"|"2"|"1"  
"104200"|"Abilify 30 MG Oral Tablet"|"76388"|"Bipolar Disorder NOS"|"2"|"1"  
"104220"|"Depakote ER 250 MG Oral Tablet Extended Release 24 Hour"|"74988"|"Seizure Disorder"|"2"|"0.285714"  
"104220"|"Depakote ER 250 MG Oral Tablet Extended Release 24 Hour"|"76388"|"Bipolar Disorder NOS"|"2"|"1"  
"104220"|"Depakote ER 250 MG Oral Tablet Extended Release 24 Hour"|"252552"|"Generalized Convulsive Tonic-  
clonic Seizure With Intractable Seizure"|"2"|"1"  
"104251"|"Clobetasol Propionate E 0.05 % External Cream"|"70112"|"Atopic Dermatitis"|"2"|"1"  
"104253"|"Strattera 10 MG Oral Capsule"|"75818"|"Attention-deficit Hyperactivity Disorder"|"2"|"0.4"  
"104253"|"Strattera 10 MG Oral Capsule"|"75819"|"ADHD, Predominantly Inattentive Type"|"2"|"1"  
"104253"|"Strattera 10 MG Oral Capsule"|"275486"|"ADHD, Combined Type"|"3"|"0.75"  
"104253"|"Strattera 10 MG Oral Capsule"|"291687"|"Attention Deficit Disorder Without Hyperactivity"|"2"|"0.666667"  
"104254"|"Strattera 25 MG Oral Capsule"|"75818"|"Attention-deficit Hyperactivity Disorder"|"4"|"0.444444"  
"104254"|"Strattera 25 MG Oral Capsule"|"75819"|"ADHD, Predominantly Inattentive Type"|"2"|"0.4"  
"104254"|"Strattera 25 MG Oral Capsule"|"275486"|"ADHD, Combined Type"|"12"|"0.75"  
"104254"|"Strattera 25 MG Oral Capsule"|"275492"|"ADHD, Predominantly Hyperactive - Impulsive"|"2"|"0.666667"  
"104255"|"Strattera 40 MG Oral Capsule"|"75818"|"Attention-deficit Hyperactivity Disorder"|"7"|"0.583333"  
"104255"|"Strattera 40 MG Oral Capsule"|"75819"|"ADHD, Predominantly Inattentive Type"|"7"|"0.466667"  
"104255"|"Strattera 40 MG Oral Capsule"|"76587"|"Anxiety Disorder NOS"|"2"|"1"  
"104255"|"Strattera 40 MG Oral Capsule"|"275486"|"ADHD, Combined Type"|"10"|"0.909091"  
"104255"|"Strattera 40 MG Oral Capsule"|"291687"|"Attention Deficit Disorder Without Hyperactivity"|"2"|"0.666667"  
"104256"|"Strattera 18 MG Oral Capsule"|"75818"|"Attention-deficit Hyperactivity Disorder"|"3"|"0.6"

"104256"|"Strattera 18 MG Oral Capsule"|"75819"|"ADHD, Predominantly Inattentive Type"|"3"|"1"  
"104256"|"Strattera 18 MG Oral Capsule"|"275486"|"ADHD, Combined Type"|"4"|"0.666667"  
"104256"|"Strattera 18 MG Oral Capsule"|"275496"|"Autistic Disorder"|"2"|"0.333333"  
"104257"|"Strattera 60 MG Oral Capsule"|"75818"|"Attention-deficit Hyperactivity Disorder"|"3"|"1"  
"104267"|"Hydrocodone-Acetaminophen 5-325 MG Oral Tablet"|"60828"|"Headache"|"4"|"0.190476"  
"104267"|"Hydrocodone-Acetaminophen 5-325 MG Oral Tablet"|"60844"|"Tooth Pain"|"2"|"0.666667"  
"104267"|"Hydrocodone-Acetaminophen 5-325 MG Oral Tablet"|"60899"|"Abdominal Pain"|"3"|"0.166667"  
"104267"|"Hydrocodone-Acetaminophen 5-325 MG Oral Tablet"|"63738"|"Peripheral Vascular Disease"|"2"|"0.2"  
"104267"|"Hydrocodone-Acetaminophen 5-325 MG Oral Tablet"|"69447"|"Diabetic Foot Ulcer"|"2"|"0.666667"  
"104267"|"Hydrocodone-Acetaminophen 5-325 MG Oral Tablet"|"70146"|"Osteoarthritis"|"3"|"0.230769"  
"104267"|"Hydrocodone-Acetaminophen 5-325 MG Oral Tablet"|"70148"|"Localized Primary Osteoarthritis"|"2"|"1"  
"104267"|"Hydrocodone-Acetaminophen 5-325 MG Oral Tablet"|"70455"|"Rheumatoid Arthritis"|"3"|"0.3"  
"104267"|"Hydrocodone-Acetaminophen 5-325 MG Oral Tablet"|"70721"|"Sacroiliitis"|"2"|"1"  
"104267"|"Hydrocodone-Acetaminophen 5-325 MG Oral Tablet"|"74529"|"Headache Syndromes"|"2"|"0.5"  
"104267"|"Hydrocodone-Acetaminophen 5-325 MG Oral Tablet"|"75728"|"Sciatica"|"2"|"0.285714"  
"104267"|"Hydrocodone-Acetaminophen 5-325 MG Oral Tablet"|"76610"|"Chronic Pain Syndrome"|"2"|"0.4"  
"104267"|"Hydrocodone-Acetaminophen 5-325 MG Oral Tablet"|"76794"|"Herpes Zoster (Shingles)"|"2"|"1"  
"104267"|"Hydrocodone-Acetaminophen 5-325 MG Oral Tablet"|"78035"|"Sickle Cell Hb-SS Disease"|"2"|"0.666667"  
"104267"|"Hydrocodone-Acetaminophen 5-325 MG Oral Tablet"|"80847"|"Renal Cell Carcinoma"|"3"|"0.75"  
"104267"|"Hydrocodone-Acetaminophen 5-325 MG Oral Tablet"|"85614"|"Joint Pain, Localized In The Hip"|"6"|"0.315789"  
"104267"|"Hydrocodone-Acetaminophen 5-325 MG Oral Tablet"|"85638"|"Ankle Joint Pain"|"3"|"0.176471"  
"104267"|"Hydrocodone-Acetaminophen 5-325 MG Oral Tablet"|"90945"|"Joint Pain, Localized In The Right Shoulder"|"2"|"0.5"  
"104267"|"Hydrocodone-Acetaminophen 5-325 MG Oral Tablet"|"91089"|"Lower Back Pain"|"12"|"0.428571"  
"104267"|"Hydrocodone-Acetaminophen 5-325 MG Oral Tablet"|"166827"|"Hydronephrosis On The Right"|"2"|"1"  
"104267"|"Hydrocodone-Acetaminophen 5-325 MG Oral Tablet"|"166843"|"Nephrolithiasis Of The Right Kidney"|"2"|"1"  
"104267"|"Hydrocodone-Acetaminophen 5-325 MG Oral Tablet"|"173442"|"Lumbar Radiculopathy"|"2"|"0.25"  
"104267"|"Hydrocodone-Acetaminophen 5-325 MG Oral Tablet"|"251467"|"Limb Pain"|"24"|"0.615385"  
"104267"|"Hydrocodone-Acetaminophen 5-325 MG Oral Tablet"|"259138"|"Rib Fracture"|"2"|"1"  
"104267"|"Hydrocodone-Acetaminophen 5-325 MG Oral Tablet"|"259187"|"Internal Derangement Of Knee"|"2"|"1"  
"104267"|"Hydrocodone-Acetaminophen 5-325 MG Oral Tablet"|"278812"|"Prostate Cancer"|"7"|"0.538462"  
"104267"|"Hydrocodone-Acetaminophen 5-325 MG Oral Tablet"|"283136"|"Bladder Cancer"|"2"|"0.5"  
"104267"|"Hydrocodone-Acetaminophen 5-325 MG Oral Tablet"|"288895"|"Chronic Pain Due To Trauma"|"2"|"0.666667"  
"104267"|"Hydrocodone-Acetaminophen 5-325 MG Oral Tablet"|"288921"|"Chronic Pain"|"9"|"0.409091"  
"104278"|"Errin 0.35 MG Oral Tablet"|"187792"|"Gynecologic Services Contraceptive Management"|"5"|"1"  
"104295"|"Hydrocodone-Acetaminophen 7.5-325 MG Oral Tablet"|"60899"|"Abdominal Pain"|"3"|"0.25"  
"104295"|"Hydrocodone-Acetaminophen 7.5-325 MG Oral Tablet"|"73666"|"Backache"|"3"|"0.272727"  
"104295"|"Hydrocodone-Acetaminophen 7.5-325 MG Oral Tablet"|"85614"|"Joint Pain, Localized In The Hip"|"2"|"0.5"  
"104295"|"Hydrocodone-Acetaminophen 7.5-325 MG Oral Tablet"|"85691"|"Neck Pain"|"2"|"0.666667"  
"104295"|"Hydrocodone-Acetaminophen 7.5-325 MG Oral Tablet"|"91089"|"Lower Back Pain"|"10"|"0.47619"  
"104295"|"Hydrocodone-Acetaminophen 7.5-325 MG Oral Tablet"|"251467"|"Limb Pain"|"21"|"0.75"  
"104295"|"Hydrocodone-Acetaminophen 7.5-325 MG Oral Tablet"|"257996"|"Arthritis"|"4"|"0.285714"  
"104295"|"Hydrocodone-Acetaminophen 7.5-325 MG Oral Tablet"|"288921"|"Chronic Pain"|"5"|"0.357143"  
"104773"|"BD Insulin Syringe 27.5G X 5/8"|"2 ML Miscellaneous"|"69380"|"Diabetes Mellitus"|"2"|"0.666667"  
"105252"|"Lancets Miscellaneous"|"69380"|"Diabetes Mellitus"|"22"|"0.468085"  
"105252"|"Lancets Miscellaneous"|"69381"|"Type II Diabetes Mellitus"|"9"|"0.36"  
"105252"|"Lancets Miscellaneous"|"69382"|"Type II Diabetes Mellitus - Uncomplicated, Uncontrolled"|"2"|"0.333333"  
"105252"|"Lancets Miscellaneous"|"69387"|"Type I Diabetes Mellitus"|"4"|"0.444444"  
"105252"|"Lancets Miscellaneous"|"69388"|"Type I Diabetes Mellitus - Uncontrolled"|"2"|"0.666667"  
"105252"|"Lancets Miscellaneous"|"69402"|"Diabetes Mellitus Poorly Controlled"|"16"|"0.64"

"105252"|"Lancets Miscellaneous"|"69461"|"Prediabetes"|"2"|"1"  
"105583"|"Accu-Chek Soft Touch Lancets Miscellaneous"|"69380"|"Diabetes Mellitus"|"3"|"0.6"  
"105761"|"Vitamin D 400 UNIT Oral Tablet"|"68058"|"Vitamin D Deficiency"|"2"|"0.222222"  
"105901"|"OneTouch Basic System w/Device Kit"|"69380"|"Diabetes Mellitus"|"2"|"0.4"  
"105901"|"OneTouch Basic System w/Device Kit"|"69381"|"Type II Diabetes Mellitus"|"2"|"1"  
"106525"|"BD Ultra-Fine Lancets Miscellaneous"|"69381"|"Type II Diabetes Mellitus"|"9"|"0.264706"  
"106525"|"BD Ultra-Fine Lancets Miscellaneous"|"69388"|"Type I Diabetes Mellitus - Uncontrolled"|"11"|"0.846154"  
"106525"|"BD Ultra-Fine Lancets Miscellaneous"|"69402"|"Diabetes Mellitus Poorly Controlled"|"33"|"0.702128"  
"106628"|"Nebulizer Device"|"64181"|"Asthma"|"2"|"0.333333"  
"106628"|"Nebulizer Device"|"64205"|"Chronic Obstructive Pulmonary Disease"|"5"|"0.625"  
"106628"|"Nebulizer Device"|"277994"|"Emphysematous Chronic Bronchitis"|"2"|"1"  
"106629"|"Peak Flow Meter Device"|"64181"|"Asthma"|"2"|"0.5"  
"106868"|"BD Insulin Syringe Ultrafine 29G X 1/2\ 1 ML Miscellaneous"|"69402"|"Diabetes Mellitus Poorly Controlled"|"3"|"1"  
"106872"|"Insulin Syringe/Needle 28G X 1/2\ 1 ML Miscellaneous"|"70704"|"Symmetric Polyarticular Inflammation"|"2"|"1"  
"106990"|"Insulin Syringe 29G X 1/2\ 0.5 ML Miscellaneous"|"69380"|"Diabetes Mellitus"|"4"|"0.4"  
"106990"|"Insulin Syringe 29G X 1/2\ 0.5 ML Miscellaneous"|"69381"|"Type II Diabetes Mellitus"|"2"|"0.285714"  
"106990"|"Insulin Syringe 29G X 1/2\ 0.5 ML Miscellaneous"|"69402"|"Diabetes Mellitus Poorly Controlled"|"7"|"0.583333"  
"106991"|"Insulin Syringe 28G X 1/2\ 1 ML Miscellaneous"|"69388"|"Type I Diabetes Mellitus - Uncontrolled"|"2"|"1"  
"106991"|"Insulin Syringe 28G X 1/2\ 1 ML Miscellaneous"|"69402"|"Diabetes Mellitus Poorly Controlled"|"3"|"0.75"  
"106992"|"Insulin Syringe 28G X 1/2\ 0.5 ML Miscellaneous"|"69380"|"Diabetes Mellitus"|"2"|"0.5"  
"107003"|"Syringe 25G X 5/8\ 3 ML Miscellaneous"|"257948"|"Vitamin B12 Deficiency"|"2"|"1"  
"107014"|"Syringe 21G X 1\ 3 ML Miscellaneous"|"69588"|"Hypogonadism"|"2"|"1"  
"107301"|"Insulin Syringe 29G X 1/2\ 1 ML Miscellaneous"|"69380"|"Diabetes Mellitus"|"5"|"0.333333"  
"107301"|"Insulin Syringe 29G X 1/2\ 1 ML Miscellaneous"|"69381"|"Type II Diabetes Mellitus"|"2"|"0.25"  
"107301"|"Insulin Syringe 29G X 1/2\ 1 ML Miscellaneous"|"69382"|"Type II Diabetes Mellitus - Uncomplicated, Uncontrolled"|"2"|"0.5"  
"107301"|"Insulin Syringe 29G X 1/2\ 1 ML Miscellaneous"|"69402"|"Diabetes Mellitus Poorly Controlled"|"9"|"0.529412"  
"107301"|"Insulin Syringe 29G X 1/2\ 1 ML Miscellaneous"|"70455"|"Rheumatoid Arthritis"|"3"|"0.6"  
"107386"|"Nebulizer Miscellaneous"|"64181"|"Asthma"|"2"|"1"  
"107533"|"Lancets Thin Miscellaneous"|"69380"|"Diabetes Mellitus"|"3"|"0.428571"  
"107533"|"Lancets Thin Miscellaneous"|"69402"|"Diabetes Mellitus Poorly Controlled"|"2"|"0.666667"  
"107628"|"BD Pen Miscellaneous"|"69381"|"Type II Diabetes Mellitus"|"7"|"0.4375"  
"107628"|"BD Pen Miscellaneous"|"69402"|"Diabetes Mellitus Poorly Controlled"|"7"|"0.875"  
"108129"|"Accu-Chek Softclix Lancets Miscellaneous"|"69380"|"Diabetes Mellitus"|"3"|"0.3"  
"108129"|"Accu-Chek Softclix Lancets Miscellaneous"|"69381"|"Type II Diabetes Mellitus"|"3"|"0.75"  
"108129"|"Accu-Chek Softclix Lancets Miscellaneous"|"69402"|"Diabetes Mellitus Poorly Controlled"|"3"|"0.6"  
"108271"|"Wrist Splint Miscellaneous"|"74315"|"Carpal Tunnel Syndrome"|"3"|"1"  
"108483"|"4-Aminopyridine Powder"|"75125"|"Multiple Sclerosis"|"11"|"0.478261"  
"108511"|"Betamethasone Powder"|"62585"|"Chronic Sinusitis"|"2"|"0.666667"  
"108511"|"Betamethasone Powder"|"62586"|"Chronic Maxillary Sinusitis"|"5"|"0.294118"  
"108511"|"Betamethasone Powder"|"62587"|"Chronic Frontal Sinusitis"|"4"|"0.266667"  
"108511"|"Betamethasone Powder"|"62588"|"Chronic Ethmoidal Sinusitis"|"11"|"0.5"  
"108588"|"BD Pen Mini Miscellaneous"|"69381"|"Type II Diabetes Mellitus"|"5"|"0.833333"  
"108588"|"BD Pen Mini Miscellaneous"|"69402"|"Diabetes Mellitus Poorly Controlled"|"4"|"0.8"  
"108608"|"Riboflavin Powder"|"257912"|"Disorder Of Mitochondrial Metabolism"|"2"|"0.5"  
"108640"|"Captopril Powder"|"63217"|"Congestive Heart Failure"|"2"|"0.4"  
"108640"|"Captopril Powder"|"63490"|"Congenital Heart Disease"|"6"|"0.285714"  
"108640"|"Captopril Powder"|"63516"|"Tricuspid Atresia"|"2"|"0.333333"  
"108640"|"Captopril Powder"|"63526"|"Hypoplastic Left Heart Syndrome"|"8"|"0.8"

"108640"|"Captopril Powder"|"63530"|"Complete Atrioventricular Canal"|"2"|"0.4"  
"108640"|"Captopril Powder"|"63598"|"Ventricular Septal Defect"|"6"|"0.222222"  
"108781"|"BD Pen Needle Short U/F 31G X 8 MM Miscellaneous"|"69380"|"Diabetes Mellitus"|"23"|"0.188525"  
"108781"|"BD Pen Needle Short U/F 31G X 8 MM Miscellaneous"|"69381"|"Type II Diabetes Mellitus"|"33"|"0.44"  
"108781"|"BD Pen Needle Short U/F 31G X 8 MM Miscellaneous"|"69382"|"Type II Diabetes Mellitus -  
Uncomplicated, Uncontrolled"|"13"|"0.684211"  
"108781"|"BD Pen Needle Short U/F 31G X 8 MM Miscellaneous"|"69387"|"Type I Diabetes  
Mellitus"|"12"|"0.571429"  
"108781"|"BD Pen Needle Short U/F 31G X 8 MM Miscellaneous"|"69388"|"Type I Diabetes Mellitus -  
Uncontrolled"|"33"|"0.804878"  
"108781"|"BD Pen Needle Short U/F 31G X 8 MM Miscellaneous"|"69401"|"Diabetes Mellitus Under  
Control"|"2"|"0.333333"  
"108781"|"BD Pen Needle Short U/F 31G X 8 MM Miscellaneous"|"69402"|"Diabetes Mellitus Poorly  
Controlled"|"81"|"0.72973"  
"108968"|"OneTouch FinePoint Lancets Miscellaneous"|"69380"|"Diabetes Mellitus"|"8"|"0.380952"  
"108968"|"OneTouch FinePoint Lancets Miscellaneous"|"69381"|"Type II Diabetes Mellitus"|"3"|"0.3"  
"108968"|"OneTouch FinePoint Lancets Miscellaneous"|"69388"|"Type I Diabetes Mellitus - Uncontrolled"|"3"|"0.6"  
"108968"|"OneTouch FinePoint Lancets Miscellaneous"|"69402"|"Diabetes Mellitus Poorly  
Controlled"|"10"|"0.833333"  
"108990"|"Colistimethate Sodium Powder"|"62582"|"Acute Ethmoidal Sinusitis"|"10"|"0.833333"  
"108990"|"Colistimethate Sodium Powder"|"62588"|"Chronic Ethmoidal Sinusitis"|"31"|"0.72093"  
"109042"|"Blood Pressure Kit KIT"|"63470"|"Benign Essential Hypertension"|"2"|"1"  
"109066"|"Enalapril Maleate Powder"|"63467"|"Hypertension"|"2"|"1"  
"109468"|"Blood Pressure Cuff Miscellaneous"|"63467"|"Hypertension"|"4"|"0.8"  
"109771"|"OneTouch Lancets Miscellaneous"|"69380"|"Diabetes Mellitus"|"11"|"0.37931"  
"109771"|"OneTouch Lancets Miscellaneous"|"69381"|"Type II Diabetes Mellitus"|"4"|"0.285714"  
"109771"|"OneTouch Lancets Miscellaneous"|"69382"|"Type II Diabetes Mellitus - Uncomplicated,  
Uncontrolled"|"2"|"0.5"  
"109771"|"OneTouch Lancets Miscellaneous"|"69387"|"Type I Diabetes Mellitus"|"3"|"1"  
"109771"|"OneTouch Lancets Miscellaneous"|"69388"|"Type I Diabetes Mellitus - Uncontrolled"|"3"|"1"  
"109771"|"OneTouch Lancets Miscellaneous"|"69401"|"Diabetes Mellitus Under Control"|"2"|"1"  
"109771"|"OneTouch Lancets Miscellaneous"|"69402"|"Diabetes Mellitus Poorly Controlled"|"9"|"0.818182"  
"109939"|"FreeStyle System KIT"|"69380"|"Diabetes Mellitus"|"2"|"0.285714"  
"109939"|"FreeStyle System KIT"|"69381"|"Type II Diabetes Mellitus"|"2"|"0.666667"  
"109939"|"FreeStyle System KIT"|"69402"|"Diabetes Mellitus Poorly Controlled"|"2"|"0.666667"  
"109940"|"FreeStyle Lancets Miscellaneous"|"69380"|"Diabetes Mellitus"|"27"|"0.3375"  
"109940"|"FreeStyle Lancets Miscellaneous"|"69381"|"Type II Diabetes Mellitus"|"14"|"0.35"  
"109940"|"FreeStyle Lancets Miscellaneous"|"69382"|"Type II Diabetes Mellitus - Uncomplicated,  
Uncontrolled"|"3"|"0.333333"  
"109940"|"FreeStyle Lancets Miscellaneous"|"69387"|"Type I Diabetes Mellitus"|"4"|"0.5"  
"109940"|"FreeStyle Lancets Miscellaneous"|"69388"|"Type I Diabetes Mellitus - Uncontrolled"|"9"|"0.642857"  
"109940"|"FreeStyle Lancets Miscellaneous"|"69401"|"Diabetes Mellitus Under Control"|"2"|"1"  
"109940"|"FreeStyle Lancets Miscellaneous"|"69402"|"Diabetes Mellitus Poorly Controlled"|"31"|"0.645833"  
"109940"|"FreeStyle Lancets Miscellaneous"|"278297"|"Glucose Intolerance"|"2"|"0.5"  
"109968"|"Blood Pressure Monitor KIT"|"63467"|"Hypertension"|"6"|"0.5"  
"109968"|"Blood Pressure Monitor KIT"|"250579"|"Blood Pressure Isolated Elevated"|"2"|"0.666667"  
"110137"|"OneTouch Ultra System w/Device Kit"|"69380"|"Diabetes Mellitus"|"3"|"1"  
"110139"|"OneTouch UltraSoft Lancets Miscellaneous"|"69380"|"Diabetes Mellitus"|"13"|"0.448276"  
"110139"|"OneTouch UltraSoft Lancets Miscellaneous"|"69381"|"Type II Diabetes Mellitus"|"9"|"0.642857"  
"110139"|"OneTouch UltraSoft Lancets Miscellaneous"|"69388"|"Type I Diabetes Mellitus - Uncontrolled"|"2"|"0.5"  
"110139"|"OneTouch UltraSoft Lancets Miscellaneous"|"69401"|"Diabetes Mellitus Under Control"|"3"|"1"  
"110139"|"OneTouch UltraSoft Lancets Miscellaneous"|"69402"|"Diabetes Mellitus Poorly Controlled"|"6"|"0.461538"  
"110192"|"BD Insulin Syringe Ultrafine 30G X 1/2\`1 ML Miscellaneous"|"69382"|"Type II Diabetes Mellitus -  
Uncomplicated, Uncontrolled"|"2"|"0.4"

"110192"|"BD Insulin Syringe Ultrafine 30G X 1/2\`1 ML Miscellaneous"|"69402"|"Diabetes Mellitus Poorly Controlled"|"12"|"0.923077"  
"110193"|"BD Insulin Syringe Ultrafine 30G X 1/2\`0.5 ML Miscellaneous"|"69402"|"Diabetes Mellitus Poorly Controlled"|"10"|"0.769231"  
"110194"|"BD Insulin Syringe Ultrafine 30G X 1/2\`0.3 ML Miscellaneous"|"69402"|"Diabetes Mellitus Poorly Controlled"|"8"|"0.8"  
"110452"|"Itraconazole Powder"|"62588"|"Chronic Ethmoidal Sinusitis"|"2"|"0.666667"  
"110469"|"Insulin Syringe 30G X 1/2\`0.5 ML Miscellaneous"|"69380"|"Diabetes Mellitus"|"8"|"0.333333"  
"110469"|"Insulin Syringe 30G X 1/2\`0.5 ML Miscellaneous"|"69402"|"Diabetes Mellitus Poorly Controlled"|"13"|"0.684211"  
"110475"|"Accu-Chek Active Care Kit KIT"|"69380"|"Diabetes Mellitus"|"2"|"0.285714"  
"110475"|"Accu-Chek Active Care Kit KIT"|"69381"|"Type II Diabetes Mellitus"|"2"|"0.5"  
"110942"|"Insulin Syringe 29G X 1/2\`0.3 ML Miscellaneous"|"69380"|"Diabetes Mellitus"|"3"|"0.272727"  
"110942"|"Insulin Syringe 29G X 1/2\`0.3 ML Miscellaneous"|"69381"|"Type II Diabetes Mellitus"|"2"|"0.333333"  
"110942"|"Insulin Syringe 29G X 1/2\`0.3 ML Miscellaneous"|"69402"|"Diabetes Mellitus Poorly Controlled"|"8"|"0.666667"  
"110945"|"Insulin Syringe 30G X 5/16\`0.5 ML Miscellaneous"|"69380"|"Diabetes Mellitus"|"3"|"0.3"  
"110945"|"Insulin Syringe 30G X 5/16\`0.5 ML Miscellaneous"|"69388"|"Type I Diabetes Mellitus - Uncontrolled"|"2"|"0.666667"  
"110945"|"Insulin Syringe 30G X 5/16\`0.5 ML Miscellaneous"|"69402"|"Diabetes Mellitus Poorly Controlled"|"5"|"0.5"  
"110946"|"Insulin Syringe 30G X 1/2\`1 ML MISC"|"69402"|"Diabetes Mellitus Poorly Controlled"|"4"|"0.444444"  
"110947"|"Insulin Syringe 30G X 5/16\`1 ML Miscellaneous"|"69402"|"Diabetes Mellitus Poorly Controlled"|"3"|"0.6"  
"110948"|"Insulin Syringe 30G X 5/16\`0.3 ML Miscellaneous"|"69380"|"Diabetes Mellitus"|"5"|"0.238095"  
"110948"|"Insulin Syringe 30G X 5/16\`0.3 ML Miscellaneous"|"69381"|"Type II Diabetes Mellitus"|"2"|"0.222222"  
"110948"|"Insulin Syringe 30G X 5/16\`0.3 ML Miscellaneous"|"69388"|"Type I Diabetes Mellitus - Uncontrolled"|"2"|"0.666667"  
"110948"|"Insulin Syringe 30G X 5/16\`0.3 ML Miscellaneous"|"69402"|"Diabetes Mellitus Poorly Controlled"|"8"|"0.5"  
"110950"|"Insulin Syringe 31G X 5/16\`1 ML Miscellaneous"|"69380"|"Diabetes Mellitus"|"2"|"0.5"  
"110950"|"Insulin Syringe 31G X 5/16\`1 ML Miscellaneous"|"69402"|"Diabetes Mellitus Poorly Controlled"|"3"|"0.75"  
"110951"|"Insulin Syringe 31G X 5/16\`0.3 ML Miscellaneous"|"69380"|"Diabetes Mellitus"|"2"|"0.4"  
"110952"|"Insulin Syringe 31G X 5/16\`0.5 ML Miscellaneous"|"69380"|"Diabetes Mellitus"|"3"|"0.428571"  
"110952"|"Insulin Syringe 31G X 5/16\`0.5 ML Miscellaneous"|"69401"|"Diabetes Mellitus Under Control"|"2"|"0.666667"  
"110952"|"Insulin Syringe 31G X 5/16\`0.5 ML Miscellaneous"|"69402"|"Diabetes Mellitus Poorly Controlled"|"6"|"0.75"  
"111007"|"CVS Auto Pressure Monitor KIT"|"63467"|"Hypertension"|"2"|"1"  
"111033"|"BD Lancet Ultrafine 33G Miscellaneous"|"69381"|"Type II Diabetes Mellitus"|"3"|"0.333333"  
"111033"|"BD Lancet Ultrafine 33G Miscellaneous"|"69387"|"Type I Diabetes Mellitus"|"5"|"0.625"  
"111033"|"BD Lancet Ultrafine 33G Miscellaneous"|"69388"|"Type I Diabetes Mellitus - Uncontrolled"|"20"|"0.869565"  
"111033"|"BD Lancet Ultrafine 33G Miscellaneous"|"69402"|"Diabetes Mellitus Poorly Controlled"|"16"|"0.8"  
"111241"|"Benzoyl Peroxide-Erythromycin 5-3 % External Gel"|"69606"|"Acne"|"4"|"0.8"  
"111249"|"Loratadine 10 MG Oral Tablet"|"61029"|"Itching (Pruritus)"|"2"|"0.333333"  
"111249"|"Loratadine 10 MG Oral Tablet"|"62578"|"Acute Sinusitis"|"6"|"0.162162"  
"111249"|"Loratadine 10 MG Oral Tablet"|"62585"|"Chronic Sinusitis"|"2"|"0.222222"  
"111249"|"Loratadine 10 MG Oral Tablet"|"62598"|"Allergic Rhinitis"|"221"|"0.663664"  
"111249"|"Loratadine 10 MG Oral Tablet"|"62599"|"Allergic Rhinitis Due To Pollen"|"2"|"0.666667"  
"111249"|"Loratadine 10 MG Oral Tablet"|"64181"|"Asthma"|"11"|"0.0614525"  
"111249"|"Loratadine 10 MG Oral Tablet"|"64565"|"Upper Respiratory Tract Disorders"|"3"|"0.428571"  
"111249"|"Loratadine 10 MG Oral Tablet"|"77891"|"Acute Upper Respiratory Infection"|"13"|"0.191176"  
"111249"|"Loratadine 10 MG Oral Tablet"|"87011"|"Drip Or Drainage Down Throat From Above"|"3"|"0.3"

"111249"|"Loratadine 10 MG Oral Tablet"|"93702"|"Allergies"|"7"|"0.170732"  
"111249"|"Loratadine 10 MG Oral Tablet"|"251528"|"Acute Otitis Media"|"2"|"0.2"  
"111249"|"Loratadine 10 MG Oral Tablet"|"289113"|"Acute Rhinitis"|"2"|"1"  
"111251"|"PARoxetine HCl 20 MG Oral Tablet"|"61118"|"Anxiety (Symptom)"|"13"|"0.619048"  
"111251"|"PARoxetine HCl 20 MG Oral Tablet"|"75935"|"Anxiety Disorder Of Unknown (Axis III)  
Etiology"|"2"|"0.666667"  
"111251"|"PARoxetine HCl 20 MG Oral Tablet"|"76306"|"Episodic Mood Disorders"|"2"|"1"  
"111251"|"PARoxetine HCl 20 MG Oral Tablet"|"76351"|"Depression"|"38"|"0.558824"  
"111251"|"PARoxetine HCl 20 MG Oral Tablet"|"76352"|"Major Depression, Single Episode"|"7"|"1"  
"111251"|"PARoxetine HCl 20 MG Oral Tablet"|"76359"|"Major Depression, Recurrent With Melancholia"|"2"|"0.5"  
"111251"|"PARoxetine HCl 20 MG Oral Tablet"|"76361"|"Moderate Recurrent Major Depression"|"2"|"0.5"  
"111251"|"PARoxetine HCl 20 MG Oral Tablet"|"76536"|"Generalized Anxiety Disorder"|"8"|"0.571429"  
"111251"|"PARoxetine HCl 20 MG Oral Tablet"|"76546"|"Obsessive Compulsive Disorder"|"2"|"0.5"  
"111251"|"PARoxetine HCl 20 MG Oral Tablet"|"76587"|"Anxiety Disorder NOS"|"5"|"0.454545"  
"111251"|"PARoxetine HCl 20 MG Oral Tablet"|"76680"|"Adjustment Disorder With Anxiety"|"3"|"0.428571"  
"111251"|"PARoxetine HCl 20 MG Oral Tablet"|"275526"|"Severe Recurrent Major Depression Without Psychotic  
Features"|"2"|"0.666667"  
"111251"|"PARoxetine HCl 20 MG Oral Tablet"|"275604"|"Depression With Anxiety"|"7"|"0.777778"  
"111252"|"PARoxetine HCl 30 MG Oral Tablet"|"61118"|"Anxiety (Symptom)"|"2"|"0.5"  
"111252"|"PARoxetine HCl 30 MG Oral Tablet"|"76351"|"Depression"|"9"|"0.818182"  
"111252"|"PARoxetine HCl 30 MG Oral Tablet"|"76536"|"Generalized Anxiety Disorder"|"3"|"1"  
"111252"|"PARoxetine HCl 30 MG Oral Tablet"|"275526"|"Severe Recurrent Major Depression Without Psychotic  
Features"|"2"|"1"  
"111254"|"Promethazine HCl 12.5 MG Rectal Suppository"|"60894"|"Nausea (Symptom)"|"3"|"1"  
"111254"|"Promethazine HCl 12.5 MG Rectal Suppository"|"87702"|"Nausea With Vomiting"|"5"|"1"  
"111256"|"Pyridostigmine Bromide 60 MG Oral Tablet"|"75733"|"Myasthenia Gravis"|"11"|"0.611111"  
"111269"|"Ipratropium Bromide 0.03 % Nasal Solution"|"62598"|"Allergic Rhinitis"|"8"|"0.571429"  
"111269"|"Ipratropium Bromide 0.03 % Nasal Solution"|"62610"|"Vasomotor Rhinitis"|"2"|"0.666667"  
"111269"|"Ipratropium Bromide 0.03 % Nasal Solution"|"62611"|"Chronic Rhinitis"|"6"|"0.75"  
"111270"|"Ipratropium Bromide 0.06 % Nasal Solution"|"60869"|"Cough"|"2"|"0.333333"  
"111270"|"Ipratropium Bromide 0.06 % Nasal Solution"|"62585"|"Chronic Sinusitis"|"4"|"0.5"  
"111270"|"Ipratropium Bromide 0.06 % Nasal Solution"|"62598"|"Allergic Rhinitis"|"8"|"0.533333"  
"111272"|"PARoxetine HCl 10 MG Oral Tablet"|"61118"|"Anxiety (Symptom)"|"6"|"0.428571"  
"111272"|"PARoxetine HCl 10 MG Oral Tablet"|"76351"|"Depression"|"15"|"0.555556"  
"111272"|"PARoxetine HCl 10 MG Oral Tablet"|"76352"|"Major Depression, Single Episode"|"2"|"1"  
"111272"|"PARoxetine HCl 10 MG Oral Tablet"|"76366"|"Chronic Major Depression"|"2"|"1"  
"111272"|"PARoxetine HCl 10 MG Oral Tablet"|"76541"|"Social Phobia"|"2"|"0.666667"  
"111272"|"PARoxetine HCl 10 MG Oral Tablet"|"76587"|"Anxiety Disorder NOS"|"2"|"0.285714"  
"111272"|"PARoxetine HCl 10 MG Oral Tablet"|"76680"|"Adjustment Disorder With Anxiety"|"3"|"0.6"  
"111272"|"PARoxetine HCl 10 MG Oral Tablet"|"275604"|"Depression With Anxiety"|"2"|"0.666667"  
"111273"|"PARoxetine HCl 40 MG Oral Tablet"|"61118"|"Anxiety (Symptom)"|"2"|"0.4"  
"111273"|"PARoxetine HCl 40 MG Oral Tablet"|"76351"|"Depression"|"11"|"0.55"  
"111273"|"PARoxetine HCl 40 MG Oral Tablet"|"76361"|"Moderate Recurrent Major Depression"|"3"|"1"  
"111273"|"PARoxetine HCl 40 MG Oral Tablet"|"76366"|"Chronic Major Depression"|"2"|"1"  
"111273"|"PARoxetine HCl 40 MG Oral Tablet"|"76536"|"Generalized Anxiety Disorder"|"5"|"0.454545"  
"111273"|"PARoxetine HCl 40 MG Oral Tablet"|"76537"|"Panic Disorder Without Agoraphobia"|"2"|"0.5"  
"111273"|"PARoxetine HCl 40 MG Oral Tablet"|"76546"|"Obsessive Compulsive Disorder"|"2"|"0.666667"  
"111273"|"PARoxetine HCl 40 MG Oral Tablet"|"76587"|"Anxiety Disorder NOS"|"2"|"0.666667"  
"111273"|"PARoxetine HCl 40 MG Oral Tablet"|"275604"|"Depression With Anxiety"|"6"|"1"  
"111276"|"Mirtazapine 30 MG Oral Tablet"|"60880"|"Appetite Lost (Anorexia)"|"2"|"1"  
"111276"|"Mirtazapine 30 MG Oral Tablet"|"61108"|"Insomnia"|"5"|"0.333333"  
"111276"|"Mirtazapine 30 MG Oral Tablet"|"75929"|"Mood Disorder Due To General Medical Condition"|"3"|"1"  
"111276"|"Mirtazapine 30 MG Oral Tablet"|"76306"|"Episodic Mood Disorders"|"4"|"0.8"  
"111276"|"Mirtazapine 30 MG Oral Tablet"|"76343"|"Bipolar I Disorder, Most Recent Episode, Depressed -

Moderate"|"4"|"0.8"

"111276"|"Mirtazapine 30 MG Oral Tablet"|"76351"|"Depression"|"22"|"0.578947"  
"111276"|"Mirtazapine 30 MG Oral Tablet"|"76357"|"Major Depression, Recurrent"|"5"|"0.5"  
"111276"|"Mirtazapine 30 MG Oral Tablet"|"251600"|"Dementia"|"2"|"0.2"  
"111276"|"Mirtazapine 30 MG Oral Tablet"|"252573"|"Frontotemporal Dementia"|"2"|"1"  
"111276"|"Mirtazapine 30 MG Oral Tablet"|"275538"|"Moderate Single Episode Major Depression"|"2"|"0.666667"  
"111277"|"Mirtazapine 15 MG Oral Tablet"|"60879"|"Decrease In Appetite"|"3"|"0.5"  
"111277"|"Mirtazapine 15 MG Oral Tablet"|"60880"|"Appetite Lost (Anorexia)"|"4"|"0.363636"  
"111277"|"Mirtazapine 15 MG Oral Tablet"|"61108"|"Insomnia"|"14"|"0.4"  
"111277"|"Mirtazapine 15 MG Oral Tablet"|"75929"|"Mood Disorder Due To General Medical Condition"|"3"|"1"  
"111277"|"Mirtazapine 15 MG Oral Tablet"|"76306"|"Episodic Mood Disorders"|"3"|"0.375"  
"111277"|"Mirtazapine 15 MG Oral Tablet"|"76343"|"Bipolar I Disorder, Most Recent Episode, Depressed -  
Moderate"|"2"|"1"  
"111277"|"Mirtazapine 15 MG Oral Tablet"|"76351"|"Depression"|"76"|"0.638655"  
"111277"|"Mirtazapine 15 MG Oral Tablet"|"76352"|"Major Depression, Single Episode"|"3"|"0.75"  
"111277"|"Mirtazapine 15 MG Oral Tablet"|"76357"|"Major Depression, Recurrent"|"10"|"0.625"  
"111277"|"Mirtazapine 15 MG Oral Tablet"|"76361"|"Moderate Recurrent Major Depression"|"2"|"0.666667"  
"111277"|"Mirtazapine 15 MG Oral Tablet"|"76383"|"Dysthymic Disorder"|"2"|"1"  
"111277"|"Mirtazapine 15 MG Oral Tablet"|"76388"|"Bipolar Disorder NOS"|"2"|"0.4"  
"111277"|"Mirtazapine 15 MG Oral Tablet"|"76537"|"Panic Disorder Without Agoraphobia"|"2"|"0.285714"  
"111277"|"Mirtazapine 15 MG Oral Tablet"|"76587"|"Anxiety Disorder NOS"|"2"|"0.2"  
"111277"|"Mirtazapine 15 MG Oral Tablet"|"98804"|"Weight Loss (On Exam)"|"2"|"0.4"  
"111277"|"Mirtazapine 15 MG Oral Tablet"|"251600"|"Dementia"|"4"|"0.125"  
"111277"|"Mirtazapine 15 MG Oral Tablet"|"275592"|"Post-traumatic Stress Disorder"|"3"|"0.428571"  
"111277"|"Mirtazapine 15 MG Oral Tablet"|"275604"|"Depression With Anxiety"|"2"|"0.5"  
"111277"|"Mirtazapine 15 MG Oral Tablet"|"283277"|"Abnormal Weight Loss"|"4"|"0.333333"  
"111282"|"Amantadine HCl 100 MG Oral Tablet"|"75124"|"Demyelinating Disorders"|"4"|"0.571429"  
"111282"|"Amantadine HCl 100 MG Oral Tablet"|"75125"|"Multiple Sclerosis"|"17"|"0.459459"  
"111282"|"Amantadine HCl 100 MG Oral Tablet"|"75813"|"Chronic Fatigue Syndrome"|"3"|"0.230769"  
"111297"|"Mirtazapine 45 MG Oral Tablet"|"76351"|"Depression"|"5"|"0.357143"  
"111297"|"Mirtazapine 45 MG Oral Tablet"|"76357"|"Major Depression, Recurrent"|"3"|"0.75"  
"111297"|"Mirtazapine 45 MG Oral Tablet"|"76361"|"Moderate Recurrent Major Depression"|"2"|"1"  
"111297"|"Mirtazapine 45 MG Oral Tablet"|"76587"|"Anxiety Disorder NOS"|"2"|"0.333333"  
"111298"|"Ciprofloxacin HCl 250 MG Oral Tablet"|"60928"|"Pain During Urination (Dysuria)"|"10"|"0.27027"  
"111298"|"Ciprofloxacin HCl 250 MG Oral Tablet"|"62578"|"Acute Sinusitis"|"3"|"0.2"  
"111298"|"Ciprofloxacin HCl 250 MG Oral Tablet"|"64118"|"Acute Bronchitis"|"3"|"0.103448"  
"111298"|"Ciprofloxacin HCl 250 MG Oral Tablet"|"64205"|"Chronic Obstructive Pulmonary Disease"|"2"|"0.25"  
"111298"|"Ciprofloxacin HCl 250 MG Oral Tablet"|"65065"|"Diverticulitis Of Colon"|"2"|"0.333333"  
"111298"|"Ciprofloxacin HCl 250 MG Oral Tablet"|"65752"|"Cystitis"|"11"|"0.44"  
"111298"|"Ciprofloxacin HCl 250 MG Oral Tablet"|"65753"|"Acute Cystitis"|"12"|"0.545455"  
"111298"|"Ciprofloxacin HCl 250 MG Oral Tablet"|"65762"|"Urinary Tract Infection"|"90"|"0.775862"  
"111298"|"Ciprofloxacin HCl 250 MG Oral Tablet"|"65764"|"Urinary Tract Infection, Geriatric  
Presentation"|"2"|"0.285714"  
"111298"|"Ciprofloxacin HCl 250 MG Oral Tablet"|"65777"|"Urge Incontinence Of Urine"|"2"|"0.333333"  
"111298"|"Ciprofloxacin HCl 250 MG Oral Tablet"|"65831"|"Prostatitis"|"2"|"0.666667"  
"111298"|"Ciprofloxacin HCl 250 MG Oral Tablet"|"289131"|"Benign Prostatic Hypertrophy"|"2"|"0.25"  
"111298"|"Ciprofloxacin HCl 250 MG Oral Tablet"|"296447"|"Preventive Medicine Counseling About Travel"|"2"|"1"  
"111299"|"Ciprofloxacin HCl 500 MG Oral Tablet"|"60902"|"Diarrhea (Symptom)"|"11"|"0.2"  
"111299"|"Ciprofloxacin HCl 500 MG Oral Tablet"|"60928"|"Pain During Urination (Dysuria)"|"27"|"0.369863"  
"111299"|"Ciprofloxacin HCl 500 MG Oral Tablet"|"62322"|"Otitis Externa"|"2"|"0.222222"  
"111299"|"Ciprofloxacin HCl 500 MG Oral Tablet"|"62577"|"Sinusitis"|"3"|"0.111111"  
"111299"|"Ciprofloxacin HCl 500 MG Oral Tablet"|"62586"|"Chronic Maxillary Sinusitis"|"5"|"0.217391"  
"111299"|"Ciprofloxacin HCl 500 MG Oral Tablet"|"62587"|"Chronic Frontal Sinusitis"|"2"|"0.222222"  
"111299"|"Ciprofloxacin HCl 500 MG Oral Tablet"|"62588"|"Chronic Ethmoidal Sinusitis"|"7"|"0.388889"

"111299""Ciprofloxacin HCl 500 MG Oral Tablet""64579""Gastroenteritis""9""0.333333"  
"111299""Ciprofloxacin HCl 500 MG Oral Tablet""64621""Infectious Gastroenteritis""5""0.714286"  
"111299""Ciprofloxacin HCl 500 MG Oral Tablet""65065""Diverticulitis Of Colon""6""0.3"  
"111299""Ciprofloxacin HCl 500 MG Oral Tablet""65622""Pyelonephritis""3""0.5"  
"111299""Ciprofloxacin HCl 500 MG Oral Tablet""65623""Acute Bacterial Pyelonephritis""2""0.285714"  
"111299""Ciprofloxacin HCl 500 MG Oral Tablet""65752""Cystitis""18""0.418605"  
"111299""Ciprofloxacin HCl 500 MG Oral Tablet""65753""Acute Cystitis""37""0.513889"  
"111299""Ciprofloxacin HCl 500 MG Oral Tablet""65755""Chronic Cystitis""2""0.4"  
"111299""Ciprofloxacin HCl 500 MG Oral Tablet""65762""Urinary Tract Infection""285""0.74026"  
"111299""Ciprofloxacin HCl 500 MG Oral Tablet""65763""Urinary Tract Infection, Pediatric  
Presentation""2""0.666667"  
"111299""Ciprofloxacin HCl 500 MG Oral Tablet""65764""Urinary Tract Infection, Geriatric  
Presentation""5""0.555556"  
"111299""Ciprofloxacin HCl 500 MG Oral Tablet""65831""Prostatitis""8""0.380952"  
"111299""Ciprofloxacin HCl 500 MG Oral Tablet""65832""Acute Bacterial Prostatitis""3""0.75"  
"111299""Ciprofloxacin HCl 500 MG Oral Tablet""65847""Urethritis""2""0.333333"  
"111299""Ciprofloxacin HCl 500 MG Oral Tablet""65856""Urethral Stricture""4""0.333333"  
"111299""Ciprofloxacin HCl 500 MG Oral Tablet""65921""Epididymitis""3""0.6"  
"111299""Ciprofloxacin HCl 500 MG Oral Tablet""66179""Cervicitis""2""0.4"  
"111299""Ciprofloxacin HCl 500 MG Oral Tablet""69999""Cellulitis""3""0.125"  
"111299""Ciprofloxacin HCl 500 MG Oral Tablet""74027""Osteomyelitis""4""0.666667"  
"111299""Ciprofloxacin HCl 500 MG Oral Tablet""77650""Atypical Mycobacterial Infection""2""0.4"  
"111299""Ciprofloxacin HCl 500 MG Oral Tablet""85607""Fever (Symptom)""4""0.25"  
"111299""Ciprofloxacin HCl 500 MG Oral Tablet""87900""Incomplete Emptying Of Bladder""2""0.4"  
"111299""Ciprofloxacin HCl 500 MG Oral Tablet""87901""Urinary Frequency Increased""8""0.421053"  
"111299""Ciprofloxacin HCl 500 MG Oral Tablet""87904""Feelings Of Urinary Urgency""4""0.571429"  
"111299""Ciprofloxacin HCl 500 MG Oral Tablet""87911""Frequent, Full-bladder Emptying (Polyuria)""2""0.25"  
"111299""Ciprofloxacin HCl 500 MG Oral Tablet""115862""Costovertebral Angle Tenderness""2""0.5"  
"111299""Ciprofloxacin HCl 500 MG Oral Tablet""166767""Infectious Diarrhea""6""0.666667"  
"111299""Ciprofloxacin HCl 500 MG Oral Tablet""166843""Nephrolithiasis Of The Right Kidney""2""0.333333"  
"111299""Ciprofloxacin HCl 500 MG Oral Tablet""199805""Serology Prostate-specific Antigen (PSA)  
Elevated""5""0.277778"  
"111299""Ciprofloxacin HCl 500 MG Oral Tablet""251528""Acute Otitis Media""3""0.333333"  
"111299""Ciprofloxacin HCl 500 MG Oral Tablet""274511""Travel Sickness""2""1"  
"111299""Ciprofloxacin HCl 500 MG Oral Tablet""278812""Prostate Cancer""10""0.277778"  
"111299""Ciprofloxacin HCl 500 MG Oral Tablet""283037""Hematuria""3""0.103448"  
"111299""Ciprofloxacin HCl 500 MG Oral Tablet""283068""Microscopic Hematuria""3""0.25"  
"111299""Ciprofloxacin HCl 500 MG Oral Tablet""283130""Benign Localized Prostatic Hyperplasia Without  
Urinary Obstruction With Other Lower Urinary Tract Symptoms""2""0.4"  
"111299""Ciprofloxacin HCl 500 MG Oral Tablet""283131""Benign Prostatic Hyperplasia Localized With Urinary  
Obstruction With Other Lower Urinary Tract Symptoms""2""0.666667"  
"111299""Ciprofloxacin HCl 500 MG Oral Tablet""296447""Preventive Medicine Counseling About  
Travel""3""0.5"  
"111299""Ciprofloxacin HCl 500 MG Oral Tablet""296638""Urinary Incontinence""6""0.214286"  
"111300""Ciprofloxacin HCl 750 MG Oral Tablet""62582""Acute Ethmoidal Sinusitis""4""0.4"  
"111300""Ciprofloxacin HCl 750 MG Oral Tablet""62586""Chronic Maxillary Sinusitis""6""0.153846"  
"111300""Ciprofloxacin HCl 750 MG Oral Tablet""62588""Chronic Ethmoidal Sinusitis""26""0.65"  
"111300""Ciprofloxacin HCl 750 MG Oral Tablet""65762""Urinary Tract Infection""3""0.428571"  
"111300""Ciprofloxacin HCl 750 MG Oral Tablet""74027""Osteomyelitis""2""1"  
"111301""Amoxicillin 200 MG/5ML Oral Suspension Reconstituted""62348""Acute Suppurative Otitis Media Of  
The Left Ear""2""1"  
"111301""Amoxicillin 200 MG/5ML Oral Suspension Reconstituted""166828""Hydronephrosis On The Left""2""1"  
"111301""Amoxicillin 200 MG/5ML Oral Suspension Reconstituted""251528""Acute Otitis Media""14""0.777778"  
"111302""Amoxicillin 400 MG/5ML Oral Suspension Reconstituted""62343""Otitis Media""24""0.24"

"111302"|"Amoxicillin 400 MG/5ML Oral Suspension Reconstituted"|"62344"|"Acute Suppurative Otitis Media"|"3"|"0.272727"

"111302"|"Amoxicillin 400 MG/5ML Oral Suspension Reconstituted"|"62345"|"Acute Suppurative Otitis Media With Spontaneous Rupture Of The Ear Drum"|"4"|"0.571429"

"111302"|"Amoxicillin 400 MG/5ML Oral Suspension Reconstituted"|"62347"|"Acute Suppurative Otitis Media Of The Right Ear"|"2"|"0.4"

"111302"|"Amoxicillin 400 MG/5ML Oral Suspension Reconstituted"|"62352"|"Acute Serous Otitis Media Of The Right Ear"|"3"|"1"

"111302"|"Amoxicillin 400 MG/5ML Oral Suspension Reconstituted"|"62354"|"Acute Serous Otitis Media Of Both Ears"|"2"|"0.666667"

"111302"|"Amoxicillin 400 MG/5ML Oral Suspension Reconstituted"|"62355"|"Acute Mucoïd Otitis Media"|"3"|"0.428571"

"111302"|"Amoxicillin 400 MG/5ML Oral Suspension Reconstituted"|"62402"|"Otitis Media Of The Right Ear"|"8"|"0.190476"

"111302"|"Amoxicillin 400 MG/5ML Oral Suspension Reconstituted"|"62403"|"Otitis Media Of The Left Ear"|"18"|"0.352941"

"111302"|"Amoxicillin 400 MG/5ML Oral Suspension Reconstituted"|"62404"|"Otitis Media In Both Ears"|"12"|"0.413793"

"111302"|"Amoxicillin 400 MG/5ML Oral Suspension Reconstituted"|"62577"|"Sinusitis"|"7"|"0.291667"

"111302"|"Amoxicillin 400 MG/5ML Oral Suspension Reconstituted"|"62578"|"Acute Sinusitis"|"24"|"0.615385"

"111302"|"Amoxicillin 400 MG/5ML Oral Suspension Reconstituted"|"62760"|"Acute Pharyngitis"|"8"|"0.333333"

"111302"|"Amoxicillin 400 MG/5ML Oral Suspension Reconstituted"|"62761"|"Group A Streptococcus: B Hemolytic Pharyngitis"|"3"|"0.230769"

"111302"|"Amoxicillin 400 MG/5ML Oral Suspension Reconstituted"|"63490"|"Congenital Heart Disease"|"3"|"0.107143"

"111302"|"Amoxicillin 400 MG/5ML Oral Suspension Reconstituted"|"64764"|"Gastritis Due To H. Pylori"|"2"|"1"

"111302"|"Amoxicillin 400 MG/5ML Oral Suspension Reconstituted"|"65762"|"Urinary Tract Infection"|"5"|"0.192308"

"111302"|"Amoxicillin 400 MG/5ML Oral Suspension Reconstituted"|"76976"|"Helicobacter Pylori (H. Pylori) Infection"|"3"|"1"

"111302"|"Amoxicillin 400 MG/5ML Oral Suspension Reconstituted"|"251528"|"Acute Otitis Media"|"176"|"0.690196"

"111302"|"Amoxicillin 400 MG/5ML Oral Suspension Reconstituted"|"251575"|"Streptococcal Sore Throat"|"9"|"0.692308"

"111302"|"Amoxicillin 400 MG/5ML Oral Suspension Reconstituted"|"265849"|"Need For Prophylactic Antibiotics"|"7"|"0.7"

"111302"|"Amoxicillin 400 MG/5ML Oral Suspension Reconstituted"|"274471"|"Acute Otitis Externa Of The Right Ear"|"2"|"1"

"111302"|"Amoxicillin 400 MG/5ML Oral Suspension Reconstituted"|"274516"|"Acute Pharyngitis Streptococcus"|"5"|"0.2"

"111312"|"Diltiazem HCl ER Beads 120 MG Oral Capsule Extended Release 24 Hour"|"63468"|"Essential Hypertension"|"2"|"0.666667"

"111313"|"Diltiazem HCl ER Beads 180 MG Oral Capsule Extended Release 24 Hour"|"63467"|"Hypertension"|"3"|"0.75"

"111314"|"Diltiazem HCl ER Beads 240 MG Oral Capsule Extended Release 24 Hour"|"63467"|"Hypertension"|"2"|"0.666667"

"111316"|"Diltiazem HCl ER Beads 360 MG Oral Capsule Extended Release 24 Hour"|"63467"|"Hypertension"|"3"|"0.428571"

"111316"|"Diltiazem HCl ER Beads 360 MG Oral Capsule Extended Release 24 Hour"|"63468"|"Essential Hypertension"|"3"|"0.75"

"111316"|"Diltiazem HCl ER Beads 360 MG Oral Capsule Extended Release 24 Hour"|"63470"|"Benign Essential Hypertension"|"4"|"0.8"

"111367"|"Polyethylene Glycol Powder"|"166777"|"Constipation"|"8"|"0.8"

"111375"|"Humira 40 MG/0.8ML Subcutaneous Kit"|"70455"|"Rheumatoid Arthritis"|"30"|"0.810811"

"111375"|"Humira 40 MG/0.8ML Subcutaneous Kit"|"70706"|"Ankylosing Spondylitis"|"11"|"0.785714"

"111375"|"Humira 40 MG/0.8ML Subcutaneous Kit"|"70719"|"Psoriatic Arthropathy"|"9"|"1"  
"111375"|"Humira 40 MG/0.8ML Subcutaneous Kit"|"70722"|"Spondylitis"|"2"|"0.4"  
"111384"|"MonoNessa 0.25-35 MG-MCG Oral Tablet"|"69549"|"Polycystic Ovarian Syndrome"|"2"|"0.666667"  
"111384"|"MonoNessa 0.25-35 MG-MCG Oral Tablet"|"250996"|"Contraceptives"|"2"|"1"  
"111399"|"Relpax 20 MG Oral Tablet"|"60828"|"Headache"|"7"|"0.538462"  
"111399"|"Relpax 20 MG Oral Tablet"|"74533"|"Migraine Headache"|"9"|"0.473684"  
"111399"|"Relpax 20 MG Oral Tablet"|"74534"|"Classic Migraine (With Aura)"|"5"|"0.714286"  
"111400"|"Relpax 40 MG Oral Tablet"|"60828"|"Headache"|"2"|"0.4"  
"111400"|"Relpax 40 MG Oral Tablet"|"74533"|"Migraine Headache"|"16"|"0.432432"  
"111400"|"Relpax 40 MG Oral Tablet"|"74534"|"Classic Migraine (With Aura)"|"5"|"0.714286"  
"111400"|"Relpax 40 MG Oral Tablet"|"74535"|"Classic Migraine (With Aura) With Intractable Migraine"|"2"|"1"  
"111400"|"Relpax 40 MG Oral Tablet"|"74537"|"Common Migraine (Without Aura)"|"7"|"0.636364"  
"111400"|"Relpax 40 MG Oral Tablet"|"74538"|"Common Migraine (Without Aura) With Intractable Migraine"|"2"|"1"  
"111514"|"Neomycin-Polymyxin-HC 3.5-10000-1 Otic Solution"|"62322"|"Otitis Externa"|"24"|"0.96"  
"111514"|"Neomycin-Polymyxin-HC 3.5-10000-1 Otic Solution"|"62329"|"Acute Otitis Externa"|"4"|"1"  
"111514"|"Neomycin-Polymyxin-HC 3.5-10000-1 Otic Solution"|"62353"|"Acute Serous Otitis Media Of The Left Ear"|"2"|"1"  
"111514"|"Neomycin-Polymyxin-HC 3.5-10000-1 Otic Solution"|"251528"|"Acute Otitis Media"|"3"|"0.428571"  
"111514"|"Neomycin-Polymyxin-HC 3.5-10000-1 Otic Solution"|"274456"|"Acute Otitis Externa Of The Left Ear"|"4"|"0.8"  
"111565"|"Accu-Chek Compact Test Drum In Vitro Strip"|"69380"|"Diabetes Mellitus"|"5"|"0.454545"  
"111565"|"Accu-Chek Compact Test Drum In Vitro Strip"|"69381"|"Type II Diabetes Mellitus"|"2"|"0.25"  
"111565"|"Accu-Chek Compact Test Drum In Vitro Strip"|"69388"|"Type I Diabetes Mellitus - Uncontrolled"|"2"|"1"  
"111565"|"Accu-Chek Compact Test Drum In Vitro Strip"|"69402"|"Diabetes Mellitus Poorly Controlled"|"4"|"0.571429"  
"111594"|"NovoLOG PenFill 100 UNIT/ML Subcutaneous Solution"|"69380"|"Diabetes Mellitus"|"4"|"0.285714"  
"111594"|"NovoLOG PenFill 100 UNIT/ML Subcutaneous Solution"|"69387"|"Type I Diabetes Mellitus"|"2"|"0.333333"  
"111594"|"NovoLOG PenFill 100 UNIT/ML Subcutaneous Solution"|"69388"|"Type I Diabetes Mellitus - Uncontrolled"|"4"|"0.8"  
"111645"|"NovoLOG FlexPen 100 UNIT/ML Subcutaneous Solution"|"65711"|"Diabetic Nephropathy Type II"|"2"|"0.4"  
"111645"|"NovoLOG FlexPen 100 UNIT/ML Subcutaneous Solution"|"69380"|"Diabetes Mellitus"|"43"|"0.183761"  
"111645"|"NovoLOG FlexPen 100 UNIT/ML Subcutaneous Solution"|"69381"|"Type II Diabetes Mellitus"|"19"|"0.161017"  
"111645"|"NovoLOG FlexPen 100 UNIT/ML Subcutaneous Solution"|"69382"|"Type II Diabetes Mellitus - Uncomplicated, Uncontrolled"|"5"|"0.238095"  
"111645"|"NovoLOG FlexPen 100 UNIT/ML Subcutaneous Solution"|"69384"|"Type II Diabetes Mellitus With Peripheral Circulatory Disorder - Uncontrolled"|"2"|"1"  
"111645"|"NovoLOG FlexPen 100 UNIT/ML Subcutaneous Solution"|"69386"|"Type II Diabetes Mellitus With Complication - Uncontrolled"|"4"|"0.444444"  
"111645"|"NovoLOG FlexPen 100 UNIT/ML Subcutaneous Solution"|"69387"|"Type I Diabetes Mellitus"|"16"|"0.390244"  
"111645"|"NovoLOG FlexPen 100 UNIT/ML Subcutaneous Solution"|"69388"|"Type I Diabetes Mellitus - Uncontrolled"|"45"|"0.75"  
"111645"|"NovoLOG FlexPen 100 UNIT/ML Subcutaneous Solution"|"69401"|"Diabetes Mellitus Under Control"|"3"|"0.272727"  
"111645"|"NovoLOG FlexPen 100 UNIT/ML Subcutaneous Solution"|"69402"|"Diabetes Mellitus Poorly Controlled"|"168"|"0.807692"  
"111645"|"NovoLOG FlexPen 100 UNIT/ML Subcutaneous Solution"|"258942"|"Type II Diabetes Mellitus - Uncomplicated, Controlled"|"2"|"0.285714"  
"111652"|"QC Hydrocortisone 1 % External Cream"|"278350"|"Eczema"|"2"|"1"  
"111854"|"Cardizem LA 120 MG Oral Tablet Extended Release 24 Hour"|"63470"|"Benign Essential Hypertension"|"2"|"0.666667"

"111855""Cardizem LA 180 MG Oral Tablet Extended Release 24 Hour""62891""Rhythm Disorder""2""1"  
"111855""Cardizem LA 180 MG Oral Tablet Extended Release 24 Hour""63467""Hypertension""2""0.4"  
"111865""Flexeril 5 MG Oral Tablet""75728""Sciatica""2""1"  
"111888""Restasis 0.05 % Ophthalmic Emulsion""70478""Sjogren's Syndrome""2""0.222222"  
"111888""Restasis 0.05 % Ophthalmic Emulsion""287522""Dry Eye Syndrome Of Both Eyes""2""0.666667"  
"111909""Anti-Fungal 1 % External Cream""70124""Tinea Corporis""2""1"  
"111922""Rapamune 2 MG Oral Tablet""74960""Tuberous Sclerosis (Bourneville's Disease)""2""0.666667"  
"111922""Rapamune 2 MG Oral Tablet""278812""Prostate Cancer""2""1"  
"111923""Thalomid 100 MG Oral Capsule""278812""Prostate Cancer""4""0.571429"  
"111924""Thalomid 200 MG Oral Capsule""181372""Renal Carcinoma""2""1"  
"112112""Ibuprofen Childrens 100 MG/5ML Oral Suspension""77891""Acute Upper Respiratory  
Infection""2""0.222222"  
"112112""Ibuprofen Childrens 100 MG/5ML Oral Suspension""85607""Fever (Symptom)""3""0.75"  
"112120""Microgestin 1/20 1-20 MG-MCG Oral Tablet""69549""Polycystic Ovarian Syndrome""2""1"  
"112120""Microgestin 1/20 1-20 MG-MCG Oral Tablet""187792""Gynecologic Services Contraceptive  
Management""10""0.666667"  
"112120""Microgestin 1/20 1-20 MG-MCG Oral Tablet""250989""Oral Contraceptives""2""1"  
"112143""Emend 80 MG Oral Capsule""260319""Colon Cancer""3""1"  
"112143""Emend 80 MG Oral Capsule""278808""Breast Cancer""4""1"  
"112174""Testim 1 % GEL""69588""Hypogonadism""2""0.333333"  
"112174""Testim 1 % GEL""168513""Hypogonadotropic Hypogonadism""3""0.6"  
"112189""NovoLOG Mix 70/30 FlexPen 70-30 % Subcutaneous Suspension""69380""Diabetes  
Mellitus""5""0.277778"  
"112189""NovoLOG Mix 70/30 FlexPen 70-30 % Subcutaneous Suspension""69382""Type II Diabetes Mellitus -  
Uncomplicated, Uncontrolled""3""0.5"  
"112189""NovoLOG Mix 70/30 FlexPen 70-30 % Subcutaneous Suspension""69402""Diabetes Mellitus Poorly  
Controlled""13""0.722222"  
"112319""Vigamox 0.5 % Ophthalmic Solution""61323""Stye In The Left Eye""2""0.5"  
"112319""Vigamox 0.5 % Ophthalmic Solution""61417""Conjunctivitis""27""0.574468"  
"112319""Vigamox 0.5 % Ophthalmic Solution""61418""Acute Conjunctivitis""54""0.683544"  
"112319""Vigamox 0.5 % Ophthalmic Solution""61462""Conjunctivitis In The Left Eye""2""0.4"  
"112319""Vigamox 0.5 % Ophthalmic Solution""61463""Conjunctivitis In Both Eyes""6""0.4"  
"112319""Vigamox 0.5 % Ophthalmic Solution""166478""Acute Bacterial Conjunctivitis""10""0.588235"  
"112330""Omeprazole Powder""64688""Esophageal Reflux""6""0.857143"  
"112360""Zovirax 5 % External Cream""76781""Herpes Simplex""4""0.8"  
"112360""Zovirax 5 % External Cream""76782""Herpes Simplex Type I""8""0.8"  
"112360""Zovirax 5 % External Cream""76783""Herpes Simplex Type II""5""0.714286"  
"112360""Zovirax 5 % External Cream""76794""Herpes Zoster (Shingles)""5""0.714286"  
"112422""Alavert Allergy/Sinus 5-120 MG Oral Tablet Extended Release 12 Hour""62578""Acute Sinusitis""3""1"  
"112429""HumaLOG Mix 75/25 Pen 75-25 % SUSP""69380""Diabetes Mellitus""4""0.571429"  
"112429""HumaLOG Mix 75/25 Pen 75-25 % SUSP""69402""Diabetes Mellitus Poorly Controlled""4""1"  
"112490""Clarinet Reditabs 5 MG Oral Tablet Dispersible""62598""Allergic Rhinitis""2""0.666667"  
"112552""Prempro 0.45-1.5 MG Oral Tablet""60977""Menopause Has Occurred""2""1"  
"112552""Prempro 0.45-1.5 MG Oral Tablet""195794""Symptomatic Menopause""2""0.666667"  
"112608""Singulair 4 MG Oral Packet""62598""Allergic Rhinitis""24""0.545455"  
"112608""Singulair 4 MG Oral Packet""62611""Chronic Rhinitis""2""0.25"  
"112608""Singulair 4 MG Oral Packet""64180""Reactive Airway Disease""4""0.190476"  
"112608""Singulair 4 MG Oral Packet""64181""Asthma""7""0.152174"  
"112649""Junel 1/20 1-20 MG-MCG Oral Tablet""187792""Gynecologic Services Contraceptive  
Management""3""0.6"  
"112649""Junel 1/20 1-20 MG-MCG Oral Tablet""250989""Oral Contraceptives""2""1"  
"112722""Xolair 150 MG Subcutaneous Solution Reconstituted""64181""Asthma""3""0.5"  
"112746""Premarin 0.45 MG Oral Tablet""195794""Symptomatic Menopause""2""0.666667"  
"112749""Reyataz 150 MG Oral Capsule""76835""HIV Infection""2""0.4"

"112750"|"Reyataz 200 MG Oral Capsule"|"76835"|"HIV Infection"|"9"|"0.75"  
"112755"|"TrueTrack Test In Vitro Strip"|"69380"|"Diabetes Mellitus"|"2"|"1"  
"113420"|"Hydrocortisone 2.5 % Rectal Cream"|"60918"|"Rectal Pain"|"2"|"1"  
"113420"|"Hydrocortisone 2.5 % Rectal Cream"|"65128"|"Hemorrhoids"|"11"|"0.611111"  
"113420"|"Hydrocortisone 2.5 % Rectal Cream"|"65141"|"External Hemorrhoids"|"10"|"0.769231"  
"113420"|"Hydrocortisone 2.5 % Rectal Cream"|"65144"|"External Hemorrhoids With Bleeding"|"4"|"1"  
"113420"|"Hydrocortisone 2.5 % Rectal Cream"|"65150"|"Anal Fissure"|"3"|"0.6"  
"113420"|"Hydrocortisone 2.5 % Rectal Cream"|"67319"|"Puerperal Hemorrhoids"|"2"|"1"  
"113420"|"Hydrocortisone 2.5 % Rectal Cream"|"87834"|"Red Blood In Bowel Movement (Hematochezia)"|"2"|"0.25"  
"113435"|"Fish Oil Concentrate 1000 MG Oral Capsule"|"67970"|"Hyperlipidemia"|"2"|"0.5"  
"113441"|"Analpram-HC 1-2.5 % Rectal Lotion"|"65150"|"Anal Fissure"|"2"|"1"  
"113454"|"Cholestyramine Powder"|"70130"|"Diaper Rash"|"4"|"0.8"  
"113458"|"Neomycin-Polymyxin-HC 3.5-10000-1 Ophthalmic Suspension"|"61417"|"Conjunctivitis"|"2"|"1"  
"113483"|"Proctocream HC 2.5 % Rectal Cream"|"65128"|"Hemorrhoids"|"2"|"1"  
"113486"|"Proctosol HC 2.5 % Rectal Cream"|"65150"|"Anal Fissure"|"3"|"1"  
"113581"|"IG-IV (HUMAN)"|"70598"|"Polymyositis / Dermatomyositis:"|"2"|"1"  
"113644"|"Sotalol HCl (AF) 120 MG Oral Tablet"|"62916"|"Atrial Fibrillation"|"2"|"1"  
"113646"|"Benicar HCT 20-12.5 MG Oral Tablet"|"63467"|"Hypertension"|"18"|"0.321429"  
"113646"|"Benicar HCT 20-12.5 MG Oral Tablet"|"63468"|"Essential Hypertension"|"14"|"0.56"  
"113646"|"Benicar HCT 20-12.5 MG Oral Tablet"|"63470"|"Benign Essential Hypertension"|"18"|"0.692308"  
"113648"|"AndroGel 25 MG/2.5GM Transdermal Gel"|"69588"|"Hypogonadism"|"9"|"0.692308"  
"113648"|"AndroGel 25 MG/2.5GM Transdermal Gel"|"76651"|"Male Erectile Disorder"|"3"|"0.272727"  
"113648"|"AndroGel 25 MG/2.5GM Transdermal Gel"|"168513"|"Hypogonadotrophic Hypogonadism"|"2"|"0.333333"  
"113668"|"AndroGel 50 MG/5GM Transdermal Gel"|"69588"|"Hypogonadism"|"24"|"0.774194"  
"113668"|"AndroGel 50 MG/5GM Transdermal Gel"|"76651"|"Male Erectile Disorder"|"8"|"0.4"  
"113668"|"AndroGel 50 MG/5GM Transdermal Gel"|"168513"|"Hypogonadotrophic Hypogonadism"|"7"|"0.583333"  
"113669"|"Crestor 5 MG Oral Tablet"|"67970"|"Hyperlipidemia"|"49"|"0.480392"  
"113669"|"Crestor 5 MG Oral Tablet"|"283291"|"Hypercholesterolemia"|"3"|"0.5"  
"113669"|"Crestor 5 MG Oral Tablet"|"283292"|"Essential Hypercholesterolemia"|"3"|"0.375"  
"113669"|"Crestor 5 MG Oral Tablet"|"291485"|"Dyslipidemia"|"11"|"0.52381"  
"113672"|"Benicar HCT 40-25 MG Oral Tablet"|"63467"|"Hypertension"|"43"|"0.40566"  
"113672"|"Benicar HCT 40-25 MG Oral Tablet"|"63468"|"Essential Hypertension"|"35"|"0.59322"  
"113672"|"Benicar HCT 40-25 MG Oral Tablet"|"63469"|"Systolic Hypertension"|"2"|"0.4"  
"113672"|"Benicar HCT 40-25 MG Oral Tablet"|"63470"|"Benign Essential Hypertension"|"19"|"0.44186"  
"113673"|"Stalevo 100 25-100-200 MG Oral Tablet"|"75080"|"Parkinson's Disease"|"33"|"0.717391"  
"113718"|"Phenadoz 25 MG Rectal Suppository"|"87702"|"Nausea With Vomiting"|"3"|"1"  
"113737"|"Sotalol HCl (AF) 80 MG Oral Tablet"|"62916"|"Atrial Fibrillation"|"4"|"0.571429"  
"113746"|"Prevacid SoluTab 15 MG Oral Tablet Dispersible"|"60886"|"Difficulty Swallowing (Dysphagia)"|"4"|"0.210526"  
"113746"|"Prevacid SoluTab 15 MG Oral Tablet Dispersible"|"60895"|"Vomiting (Symptom)"|"5"|"0.454545"  
"113746"|"Prevacid SoluTab 15 MG Oral Tablet Dispersible"|"60899"|"Abdominal Pain"|"6"|"0.428571"  
"113746"|"Prevacid SoluTab 15 MG Oral Tablet Dispersible"|"64680"|"Chronic Reflux Esophagitis"|"5"|"0.555556"  
"113746"|"Prevacid SoluTab 15 MG Oral Tablet Dispersible"|"64688"|"Esophageal Reflux"|"70"|"0.569106"  
"113746"|"Prevacid SoluTab 15 MG Oral Tablet Dispersible"|"87743"|"Diffuse Abdominal Pain"|"4"|"0.666667"  
"113801"|"Midodrine HCl 5 MG Oral Tablet"|"69527"|"Orthostatic Hypotension"|"3"|"0.428571"  
"113840"|"PriLOSEC OTC 20 MG Oral Tablet Delayed Release"|"64688"|"Esophageal Reflux"|"4"|"0.25"  
"113844"|"Calcitriol 1 MCG/ML Oral Solution"|"69353"|"Secondary Hyperparathyroidism"|"3"|"0.75"  
"113844"|"Calcitriol 1 MCG/ML Oral Solution"|"78154"|"DiGeorge Syndrome"|"2"|"1"  
"113844"|"Calcitriol 1 MCG/ML Oral Solution"|"258937"|"Renal Secondary Hyperparathyroidism"|"3"|"0.6"  
"113899"|"Crestor 10 MG Oral Tablet"|"67969"|"Familial Combined Hyperlipidemia"|"3"|"0.75"  
"113899"|"Crestor 10 MG Oral Tablet"|"67970"|"Hyperlipidemia"|"131"|"0.517787"  
"113899"|"Crestor 10 MG Oral Tablet"|"68098"|"Lipoid Metabolism Disorder"|"3"|"0.6"  
"113899"|"Crestor 10 MG Oral Tablet"|"283291"|"Hypercholesterolemia"|"7"|"0.35"  
"113899"|"Crestor 10 MG Oral Tablet"|"283292"|"Essential Hypercholesterolemia"|"15"|"0.441176"

"113899""Crestor 10 MG Oral Tablet""291485""Dyslipidemia""19""0.487179"  
"113917""Uroxatral 10 MG TBCR""289131""Benign Prostatic Hypertrophy""2""0.666667"  
"113943""Abilify 5 MG Oral Tablet""76272""Schizoaffective Disorder""5""1"  
"113943""Abilify 5 MG Oral Tablet""76306""Episodic Mood Disorders""5""0.555556"  
"113943""Abilify 5 MG Oral Tablet""76307""Bipolar Disorder""5""0.555556"  
"113943""Abilify 5 MG Oral Tablet""76329""Bipolar I Disorder, Most Recent Episode, Mixed In Partial  
Remission""2""1"  
"113943""Abilify 5 MG Oral Tablet""76351""Depression""9""0.264706"  
"113943""Abilify 5 MG Oral Tablet""76357""Major Depression, Recurrent""4""0.571429"  
"113943""Abilify 5 MG Oral Tablet""76361""Moderate Recurrent Major Depression""7""0.875"  
"113943""Abilify 5 MG Oral Tablet""76363""Major Depression, Recurrent With Psychotic Features""4""0.8"  
"113943""Abilify 5 MG Oral Tablet""76364""Recurrent Major Depression In Partial Remission""2""1"  
"113943""Abilify 5 MG Oral Tablet""76388""Bipolar Disorder NOS""11""0.578947"  
"113943""Abilify 5 MG Oral Tablet""76587""Anxiety Disorder NOS""2""0.2"  
"113943""Abilify 5 MG Oral Tablet""275496""Autistic Disorder""2""0.25"  
"113943""Abilify 5 MG Oral Tablet""275540""Severe Recurrent Major Depression With Psychotic Features""3""1"  
"113952""Benicar HCT 40-12.5 MG Oral Tablet""62975""Coronary Artery Disease""3""0.15"  
"113952""Benicar HCT 40-12.5 MG Oral Tablet""63467""Hypertension""14""0.341463"  
"113952""Benicar HCT 40-12.5 MG Oral Tablet""63468""Essential Hypertension""14""0.636364"  
"113952""Benicar HCT 40-12.5 MG Oral Tablet""63470""Benign Essential Hypertension""11""0.458333"  
"113974""Keppra 100 MG/ML Oral Solution""74960""Tuberous Sclerosis (Bourneville's Disease)""2""0.4"  
"113974""Keppra 100 MG/ML Oral Solution""74988""Seizure Disorder""36""0.514286"  
"113974""Keppra 100 MG/ML Oral Solution""75001""Partial Complex Psychomotor Seizure""2""0.333333"  
"113974""Keppra 100 MG/ML Oral Solution""75002""Partial Complex Psychomotor Seizure With Intractable  
Seizure""2""0.5"  
"113974""Keppra 100 MG/ML Oral Solution""297231""Epilepsy""7""0.466667"  
"114004""Ciprodex 0.3-0.1 % Otic Suspension""34687""Open Wound Of The Auditory Canal""2""1"  
"114004""Ciprodex 0.3-0.1 % Otic Suspension""62322""Otitis Externa""11""0.6875"  
"114004""Ciprodex 0.3-0.1 % Otic Suspension""62324""Infective Otitis Externa""4""0.8"  
"114004""Ciprodex 0.3-0.1 % Otic Suspension""62327""Acute Swimmer's Ear""4""0.571429"  
"114004""Ciprodex 0.3-0.1 % Otic Suspension""62329""Acute Otitis Externa""13""0.464286"  
"114004""Ciprodex 0.3-0.1 % Otic Suspension""62330""Acute Actinic Otitis Externa""2""0.333333"  
"114004""Ciprodex 0.3-0.1 % Otic Suspension""62343""Otitis Media""5""0.121951"  
"114004""Ciprodex 0.3-0.1 % Otic Suspension""62344""Acute Suppurative Otitis Media""8""0.275862"  
"114004""Ciprodex 0.3-0.1 % Otic Suspension""62345""Acute Suppurative Otitis Media With Spontaneous Rupture  
Of The Ear Drum""2""0.333333"  
"114004""Ciprodex 0.3-0.1 % Otic Suspension""62350""Acute Serous Otitis Media""2""0.333333"  
"114004""Ciprodex 0.3-0.1 % Otic Suspension""62352""Acute Serous Otitis Media Of The Right  
Ear""2""0.666667"  
"114004""Ciprodex 0.3-0.1 % Otic Suspension""62355""Acute Mucooid Otitis Media""3""0.5"  
"114004""Ciprodex 0.3-0.1 % Otic Suspension""62371""Chronic Atticoantral Suppurative Otitis  
Media""7""0.225806"  
"114004""Ciprodex 0.3-0.1 % Otic Suspension""62384""Chronic Serous Otitis Media""4""0.5"  
"114004""Ciprodex 0.3-0.1 % Otic Suspension""62387""Chronic Serous Otitis Media Of Both Ears""2""0.666667"  
"114004""Ciprodex 0.3-0.1 % Otic Suspension""62388""Chronic Mucooid Otitis Media""17""0.386364"  
"114004""Ciprodex 0.3-0.1 % Otic Suspension""62391""Chronic Mucooid Otitis Media Of Both Ears""9""0.692308"  
"114004""Ciprodex 0.3-0.1 % Otic Suspension""62405""Adhesive Otitis""2""1"  
"114004""Ciprodex 0.3-0.1 % Otic Suspension""62409""Cerumen Impaction""4""0.173913"  
"114004""Ciprodex 0.3-0.1 % Otic Suspension""62415""Foreign Body In The Left Ear""2""0.666667"  
"114004""Ciprodex 0.3-0.1 % Otic Suspension""62503""Cholesteatoma In The Left Ear""2""1"  
"114004""Ciprodex 0.3-0.1 % Otic Suspension""62543""Earache""2""0.333333"  
"114004""Ciprodex 0.3-0.1 % Otic Suspension""62550""Tympanic Membrane Perforation""3""0.230769"  
"114004""Ciprodex 0.3-0.1 % Otic Suspension""62551""Central Perforation Of The Tympanic  
Membrane""3""0.375"

"114004"|"Ciprodex 0.3-0.1 % Otic Suspension"|"64749"|"Gastrostomy Complication"|"2"|"0.4"  
"114004"|"Ciprodex 0.3-0.1 % Otic Suspension"|"64750"|"Gastrostomy Infection"|"4"|"0.8"  
"114004"|"Ciprodex 0.3-0.1 % Otic Suspension"|"76442"|"Failure To Thrive In Childhood"|"4"|"0.190476"  
"114004"|"Ciprodex 0.3-0.1 % Otic Suspension"|"86958"|"Discharge From The Ears"|"4"|"0.5"  
"114004"|"Ciprodex 0.3-0.1 % Otic Suspension"|"191631"|"Gastrostomy Care"|"6"|"0.333333"  
"114004"|"Ciprodex 0.3-0.1 % Otic Suspension"|"251528"|"Acute Otitis Media"|"16"|"0.363636"  
"114004"|"Ciprodex 0.3-0.1 % Otic Suspension"|"251529"|"Chronic Otitis Media"|"8"|"0.533333"  
"114004"|"Ciprodex 0.3-0.1 % Otic Suspension"|"274422"|"Acute Recurrent Otitis Media"|"2"|"0.4"  
"114004"|"Ciprodex 0.3-0.1 % Otic Suspension"|"274445"|"Chronic Otitis Externa"|"11"|"0.846154"  
"114004"|"Ciprodex 0.3-0.1 % Otic Suspension"|"274456"|"Acute Otitis Externa Of The Left Ear"|"2"|"0.666667"  
"114004"|"Ciprodex 0.3-0.1 % Otic Suspension"|"274459"|"Acute Recurrent Otitis Media Of Both Ears"|"2"|"1"  
"114004"|"Ciprodex 0.3-0.1 % Otic Suspension"|"274471"|"Acute Otitis Externa Of The Right Ear"|"3"|"0.75"  
"114004"|"Ciprodex 0.3-0.1 % Otic Suspension"|"274473"|"Chronic Otitis Media Of Both Ears"|"4"|"0.444444"  
"114004"|"Ciprodex 0.3-0.1 % Otic Suspension"|"274478"|"Tympanic Membrane Perforation Of The Left Ear"|"2"|"1"  
"114023"|"Lithium Carbonate 450 MG Oral Tablet Extended Release"|"76307"|"Bipolar Disorder"|"2"|"0.333333"  
"114030"|"Stalevo 150 37.5-150-200 MG Oral Tablet"|"75080"|"Parkinson's Disease"|"20"|"0.869565"  
"114041"|"Kerlix Gauze Roll Miscellaneous"|"81584"|"Burns"|"4"|"0.8"  
"114051"|"Potassium Chloride Crys CR 20 MEQ Oral Tablet Extended Release"|"63467"|"Hypertension"|"8"|"0.129032"  
"114051"|"Potassium Chloride Crys CR 20 MEQ Oral Tablet Extended Release"|"63468"|"Essential Hypertension"|"7"|"0.225806"  
"114051"|"Potassium Chloride Crys CR 20 MEQ Oral Tablet Extended Release"|"68089"|"Hypokalemia"|"13"|"0.722222"  
"114051"|"Potassium Chloride Crys CR 20 MEQ Oral Tablet Extended Release"|"278808"|"Breast Cancer"|"2"|"0.2"  
"114087"|"Avonex Prefilled 30 MCG/0.5ML Intramuscular Kit"|"75125"|"Multiple Sclerosis"|"3"|"0.25"  
"114090"|"Junel FE 1/20 1-20 MG-MCG Oral Tablet"|"187792"|"Gynecologic Services Contraceptive Management"|"2"|"0.666667"  
"114099"|"Levitra 10 MG Oral Tablet"|"69588"|"Hypogonadism"|"2"|"0.5"  
"114099"|"Levitra 10 MG Oral Tablet"|"76651"|"Male Erectile Disorder"|"11"|"0.55"  
"114099"|"Levitra 10 MG Oral Tablet"|"76661"|"Male Erectile Disorder Due To Physical Condition"|"2"|"1"  
"114105"|"Levitra 20 MG Oral Tablet"|"69588"|"Hypogonadism"|"2"|"0.222222"  
"114105"|"Levitra 20 MG Oral Tablet"|"76651"|"Male Erectile Disorder"|"22"|"0.611111"  
"114124"|"Lidocaine-Prilocaine 2.5-2.5 % External Cream"|"70475"|"Scleroderma"|"2"|"0.666667"  
"114124"|"Lidocaine-Prilocaine 2.5-2.5 % External Cream"|"75125"|"Multiple Sclerosis"|"3"|"1"  
"114124"|"Lidocaine-Prilocaine 2.5-2.5 % External Cream"|"274711"|"End Stage Renal Disease"|"2"|"0.5"  
"114128"|"Metolazone 2.5 MG Oral Tablet"|"63217"|"Congestive Heart Failure"|"9"|"0.25"  
"114128"|"Metolazone 2.5 MG Oral Tablet"|"63467"|"Hypertension"|"5"|"0.147059"  
"114128"|"Metolazone 2.5 MG Oral Tablet"|"68084"|"Fluid Overload"|"2"|"0.666667"  
"114128"|"Metolazone 2.5 MG Oral Tablet"|"250918"|"Chronic Systolic Congestive Heart Failure"|"2"|"0.5"  
"114165"|"Crestor 20 MG Oral Tablet"|"62975"|"Coronary Artery Disease"|"11"|"0.146667"  
"114165"|"Crestor 20 MG Oral Tablet"|"67970"|"Hyperlipidemia"|"89"|"0.517442"  
"114165"|"Crestor 20 MG Oral Tablet"|"201186"|"Ischemic Stroke"|"2"|"0.333333"  
"114165"|"Crestor 20 MG Oral Tablet"|"283291"|"Hypercholesterolemia"|"4"|"0.307692"  
"114165"|"Crestor 20 MG Oral Tablet"|"283292"|"Essential Hypercholesterolemia"|"4"|"0.363636"  
"114165"|"Crestor 20 MG Oral Tablet"|"291485"|"Dyslipidemia"|"6"|"0.375"  
"114167"|"Wellbutrin XL 150 MG Oral Tablet Extended Release 24 Hour"|"76351"|"Depression"|"8"|"0.210526"  
"114198"|"Stalevo 50 12.5-50-200 MG Oral Tablet"|"75080"|"Parkinson's Disease"|"4"|"0.666667"  
"114262"|"Metolazone 5 MG Oral Tablet"|"63217"|"Congestive Heart Failure"|"5"|"0.333333"  
"114262"|"Metolazone 5 MG Oral Tablet"|"250918"|"Chronic Systolic Congestive Heart Failure"|"2"|"0.666667"  
"114262"|"Metolazone 5 MG Oral Tablet"|"282680"|"Edema"|"7"|"0.636364"  
"114278"|"Wellbutrin XL 300 MG Oral Tablet Extended Release 24 Hour"|"76351"|"Depression"|"4"|"0.114286"  
"114284"|"Prevacid SoluTab 30 MG Oral Tablet Dispersible"|"60895"|"Vomiting (Symptom)"|"3"|"0.375"  
"114284"|"Prevacid SoluTab 30 MG Oral Tablet Dispersible"|"60899"|"Abdominal Pain"|"10"|"0.625"  
"114284"|"Prevacid SoluTab 30 MG Oral Tablet Dispersible"|"64688"|"Esophageal Reflux"|"25"|"0.595238"

"114284"|"Prevacid SoluTab 30 MG Oral Tablet Dispersible"|"87736"|"Abdominal Pain In The Central Upper Belly (Epigastric)"|"5"|"0.625"  
"114284"|"Prevacid SoluTab 30 MG Oral Tablet Dispersible"|"87743"|"Diffuse Abdominal Pain"|"2"|"0.5"  
"114284"|"Prevacid SoluTab 30 MG Oral Tablet Dispersible"|"282815"|"Abdominal Pain Of Childhood"|"2"|"0.666667"  
"114284"|"Prevacid SoluTab 30 MG Oral Tablet Dispersible"|"292064"|"Dysphagia"|"2"|"0.333333"  
"114308"|"Potassium Chloride Crys CR 10 MEQ Oral Tablet Extended Release"|"63468"|"Essential Hypertension"|"2"|"0.5"  
"114308"|"Potassium Chloride Crys CR 10 MEQ Oral Tablet Extended Release"|"68089"|"Hypokalemia"|"2"|"0.666667"  
"114312"|"Omeprazole 10 MG Oral Capsule Delayed Release"|"60891"|"Heartburn"|"3"|"0.75"  
"114312"|"Omeprazole 10 MG Oral Capsule Delayed Release"|"64688"|"Esophageal Reflux"|"6"|"0.6"  
"114329"|"Guaifenesin-Codeine 100-10 MG/5ML LIQD"|"60869"|"Cough"|"2"|"0.285714"  
"114329"|"Guaifenesin-Codeine 100-10 MG/5ML LIQD"|"64118"|"Acute Bronchitis"|"2"|"0.25"  
"114346"|"Phenadoz 12.5 MG Rectal Suppository"|"60894"|"Nausea (Symptom)"|"2"|"1"  
"114346"|"Phenadoz 12.5 MG Rectal Suppository"|"64579"|"Gastroenteritis"|"2"|"1"  
"114346"|"Phenadoz 12.5 MG Rectal Suppository"|"87702"|"Nausea With Vomiting"|"2"|"1"  
"114351"|"Emtriva 200 MG Oral Capsule"|"76835"|"HIV Infection"|"7"|"0.7"  
"114353"|"Crestor 40 MG Oral Tablet"|"62975"|"Coronary Artery Disease"|"11"|"0.180328"  
"114353"|"Crestor 40 MG Oral Tablet"|"67970"|"Hyperlipidemia"|"64"|"0.653061"  
"114353"|"Crestor 40 MG Oral Tablet"|"283292"|"Essential Hypercholesterolemia"|"8"|"0.533333"  
"114353"|"Crestor 40 MG Oral Tablet"|"291485"|"Dyslipidemia"|"5"|"0.454545"  
"114718"|"Namenda 10 MG Oral Tablet"|"35314"|"Personality Change Due To Axis III Etiology"|"2"|"0.4"  
"114718"|"Namenda 10 MG Oral Tablet"|"61048"|"Memory Lapses Or Loss"|"34"|"0.557377"  
"114718"|"Namenda 10 MG Oral Tablet"|"75020"|"Alzheimer's Disease"|"51"|"0.451327"  
"114718"|"Namenda 10 MG Oral Tablet"|"75026"|"Alzheimer's Disease Late Onset"|"2"|"1"  
"114718"|"Namenda 10 MG Oral Tablet"|"75032"|"Vascular Dementia"|"17"|"0.53125"  
"114718"|"Namenda 10 MG Oral Tablet"|"75080"|"Parkinson's Disease"|"3"|"0.111111"  
"114718"|"Namenda 10 MG Oral Tablet"|"75834"|"Disruptive Behavior Disorder"|"2"|"0.666667"  
"114718"|"Namenda 10 MG Oral Tablet"|"163751"|"Cognitive Functions Current Level Impaired"|"8"|"0.533333"  
"114718"|"Namenda 10 MG Oral Tablet"|"251600"|"Dementia"|"54"|"0.457627"  
"114718"|"Namenda 10 MG Oral Tablet"|"252573"|"Frontotemporal Dementia"|"17"|"0.809524"  
"114718"|"Namenda 10 MG Oral Tablet"|"252575"|"Dementia With Lewy Bodies"|"12"|"0.857143"  
"114718"|"Namenda 10 MG Oral Tablet"|"275483"|"Dementia Of Alzheimer's Type"|"7"|"0.7"  
"114718"|"Namenda 10 MG Oral Tablet"|"275500"|"Cognitive Disorder"|"3"|"0.5"  
"114718"|"Namenda 10 MG Oral Tablet"|"289875"|"Presenile Dementia"|"2"|"1"  
"114718"|"Namenda 10 MG Oral Tablet"|"289876"|"Alzheimer's Disease With Behavioral Disturbance"|"5"|"0.416667"  
"114718"|"Namenda 10 MG Oral Tablet"|"291786"|"Senile Dementia"|"2"|"0.666667"  
"114719"|"Propranolol HCl CR 80 MG Oral Capsule Extended Release 24 Hour"|"61118"|"Anxiety (Symptom)"|"5"|"0.625"  
"114719"|"Propranolol HCl CR 80 MG Oral Capsule Extended Release 24 Hour"|"62975"|"Coronary Artery Disease"|"3"|"0.272727"  
"114719"|"Propranolol HCl CR 80 MG Oral Capsule Extended Release 24 Hour"|"63467"|"Hypertension"|"3"|"0.111111"  
"114719"|"Propranolol HCl CR 80 MG Oral Capsule Extended Release 24 Hour"|"63468"|"Essential Hypertension"|"5"|"0.416667"  
"114719"|"Propranolol HCl CR 80 MG Oral Capsule Extended Release 24 Hour"|"74533"|"Migraine Headache"|"4"|"0.333333"  
"114719"|"Propranolol HCl CR 80 MG Oral Capsule Extended Release 24 Hour"|"74537"|"Common Migraine (Without Aura)"|"2"|"1"  
"114722"|"Cialis 10 MG Oral Tablet"|"65952"|"Organic Impotence"|"2"|"1"  
"114722"|"Cialis 10 MG Oral Tablet"|"76651"|"Male Erectile Disorder"|"39"|"0.764706"  
"114722"|"Cialis 10 MG Oral Tablet"|"76661"|"Male Erectile Disorder Due To Physical Condition"|"5"|"0.833333"  
"114750"|"Ditropan XL 5 MG Oral Tablet Extended Release 24 Hour"|"75125"|"Multiple Sclerosis"|"2"|"0.666667"

"114759"|"Inderal LA 80 MG Oral Capsule Extended Release 24 Hour"|"74529"|"Headache Syndromes"|"2"|"0.666667"  
"114759"|"Inderal LA 80 MG Oral Capsule Extended Release 24 Hour"|"74533"|"Migraine Headache"|"2"|"0.285714"  
"114762"|"Topamax 50 MG Oral Tablet"|"75002"|"Partial Complex Psychomotor Seizure With Intractable Seizure"|"2"|"0.5"  
"114832"|"NIFedipine 90 MG Oral Tablet Extended Release 24 Hour"|"63467"|"Hypertension"|"13"|"0.40625"  
"114832"|"NIFedipine 90 MG Oral Tablet Extended Release 24 Hour"|"63468"|"Essential Hypertension"|"3"|"0.176471"  
"114843"|"Spiriva HandiHaler 18 MCG Inhalation Capsule"|"60863"|"Difficulty Breathing (Dyspnea)"|"3"|"0.1"  
"114843"|"Spiriva HandiHaler 18 MCG Inhalation Capsule"|"64181"|"Asthma"|"8"|"0.170213"  
"114843"|"Spiriva HandiHaler 18 MCG Inhalation Capsule"|"64205"|"Chronic Obstructive Pulmonary Disease"|"76"|"0.638655"  
"114843"|"Spiriva HandiHaler 18 MCG Inhalation Capsule"|"64206"|"Chronic Bronchitis"|"3"|"0.375"  
"114843"|"Spiriva HandiHaler 18 MCG Inhalation Capsule"|"64212"|"Emphysema"|"13"|"0.393939"  
"114843"|"Spiriva HandiHaler 18 MCG Inhalation Capsule"|"247012"|"Shortness Of Breath"|"5"|"0.263158"  
"114854"|"Terconazole 0.8 % Vaginal Cream"|"66213"|"Vaginitis"|"10"|"0.454545"  
"114854"|"Terconazole 0.8 % Vaginal Cream"|"66214"|"Candida Albicans Vaginitis"|"24"|"0.8"  
"114854"|"Terconazole 0.8 % Vaginal Cream"|"66250"|"Candida Albicans Vulvovaginitis"|"11"|"0.733333"  
"114854"|"Terconazole 0.8 % Vaginal Cream"|"77211"|"Vaginal Candidiasis"|"136"|"0.906667"  
"114861"|"Riomet 500 MG/5ML Oral Solution"|"67970"|"Hyperlipidemia"|"2"|"0.222222"  
"114861"|"Riomet 500 MG/5ML Oral Solution"|"69381"|"Type II Diabetes Mellitus"|"3"|"0.428571"  
"114861"|"Riomet 500 MG/5ML Oral Solution"|"69402"|"Diabetes Mellitus Poorly Controlled"|"6"|"0.75"  
"114867"|"Sudafed 12 Hour 120 MG Oral Tablet Extended Release 12 Hour"|"62598"|"Allergic Rhinitis"|"2"|"0.666667"  
"114867"|"Sudafed 12 Hour 120 MG Oral Tablet Extended Release 12 Hour"|"77891"|"Acute Upper Respiratory Infection"|"2"|"0.666667"  
"114875"|"Benazepril HCl 20 MG Oral Tablet"|"63467"|"Hypertension"|"11"|"0.423077"  
"114875"|"Benazepril HCl 20 MG Oral Tablet"|"63468"|"Essential Hypertension"|"7"|"0.636364"  
"114875"|"Benazepril HCl 20 MG Oral Tablet"|"63470"|"Benign Essential Hypertension"|"7"|"0.538462"  
"114876"|"Benazepril-Hydrochlorothiazide 20-12.5 MG Oral Tablet"|"63467"|"Hypertension"|"3"|"0.5"  
"114876"|"Benazepril-Hydrochlorothiazide 20-12.5 MG Oral Tablet"|"63470"|"Benign Essential Hypertension"|"9"|"1"  
"114881"|"TriNessa (28) 0.18/0.215/0.25 MG-35 MCG Oral Tablet"|"69549"|"Polycystic Ovarian Syndrome"|"3"|"0.6"  
"114881"|"TriNessa (28) 0.18/0.215/0.25 MG-35 MCG Oral Tablet"|"187792"|"Gynecologic Services Contraceptive Management"|"10"|"0.714286"  
"114881"|"TriNessa (28) 0.18/0.215/0.25 MG-35 MCG Oral Tablet"|"250996"|"Contraceptives"|"5"|"0.833333"  
"114885"|"Hydrocodone-Acetaminophen 7.5-500 MG/15ML Oral Solution"|"62587"|"Chronic Frontal Sinusitis"|"2"|"1"  
"114885"|"Hydrocodone-Acetaminophen 7.5-500 MG/15ML Oral Solution"|"62732"|"Tonsillitis"|"2"|"1"  
"114885"|"Hydrocodone-Acetaminophen 7.5-500 MG/15ML Oral Solution"|"62743"|"Chronic Tonsillitis"|"5"|"0.714286"  
"114885"|"Hydrocodone-Acetaminophen 7.5-500 MG/15ML Oral Solution"|"62745"|"Tonsillar Hypertrophy"|"3"|"0.333333"  
"114885"|"Hydrocodone-Acetaminophen 7.5-500 MG/15ML Oral Solution"|"62760"|"Acute Pharyngitis"|"3"|"0.6"  
"114885"|"Hydrocodone-Acetaminophen 7.5-500 MG/15ML Oral Solution"|"77891"|"Acute Upper Respiratory Infection"|"2"|"0.4"  
"114885"|"Hydrocodone-Acetaminophen 7.5-500 MG/15ML Oral Solution"|"78620"|"Malignant Neoplasm Of The Oral Cavity"|"2"|"1"  
"114885"|"Hydrocodone-Acetaminophen 7.5-500 MG/15ML Oral Solution"|"201752"|"Squamous Cell Carcinoma"|"2"|"1"  
"114885"|"Hydrocodone-Acetaminophen 7.5-500 MG/15ML Oral Solution"|"260134"|"Laryngeal Cancer"|"2"|"1"  
"114899"|"Lactulose 10 GM/15ML Oral Solution"|"65032"|"Neurogenic Bowel"|"2"|"0.5"  
"114899"|"Lactulose 10 GM/15ML Oral Solution"|"65055"|"Chronic Constipation"|"25"|"0.480769"  
"114899"|"Lactulose 10 GM/15ML Oral Solution"|"65076"|"Irritable Bowel Syndrome"|"2"|"0.666667"  
"114899"|"Lactulose 10 GM/15ML Oral Solution"|"65150"|"Anal Fissure"|"2"|"0.285714"

"114899"|"Lactulose 10 GM/15ML Oral Solution"|"65286"|"Cirrhosis"|"3"|"0.272727"  
"114899"|"Lactulose 10 GM/15ML Oral Solution"|"67927"|"Hyperammonemia"|"4"|"0.8"  
"114899"|"Lactulose 10 GM/15ML Oral Solution"|"75080"|"Parkinson's Disease"|"2"|"0.333333"  
"114899"|"Lactulose 10 GM/15ML Oral Solution"|"79017"|"Hepatocellular Carcinoma Of The Liver"|"3"|"0.428571"  
"114899"|"Lactulose 10 GM/15ML Oral Solution"|"166777"|"Constipation"|"137"|"0.744565"  
"114899"|"Lactulose 10 GM/15ML Oral Solution"|"257912"|"Disorder Of Mitochondrial Metabolism"|"2"|"0.25"  
"114913"|"Uroxatral 10 MG Oral Tablet Extended Release 24 Hour"|"87902"|"Urinary Frequency More Than Twice At Night (Nocturia)"|"2"|"0.666667"  
"114913"|"Uroxatral 10 MG Oral Tablet Extended Release 24 Hour"|"289131"|"Benign Prostatic Hypertrophy"|"4"|"0.4"  
"114921"|"GuaiFENesin AC 100-10 MG/5ML Oral Syrup"|"60869"|"Cough"|"8"|"0.380952"  
"114921"|"GuaiFENesin AC 100-10 MG/5ML Oral Syrup"|"62578"|"Acute Sinusitis"|"2"|"0.5"  
"114921"|"GuaiFENesin AC 100-10 MG/5ML Oral Syrup"|"64118"|"Acute Bronchitis"|"8"|"0.363636"  
"114921"|"GuaiFENesin AC 100-10 MG/5ML Oral Syrup"|"77891"|"Acute Upper Respiratory Infection"|"2"|"0.25"  
"114929"|"Lexiva 700 MG Oral Tablet"|"76835"|"HIV Infection"|"11"|"0.733333"  
"114955"|"MetFORMIN HCl 500 MG Oral Tablet Extended Release 24 Hour"|"66015"|"Ovarian Disorders"|"2"|"0.666667"  
"114955"|"MetFORMIN HCl 500 MG Oral Tablet Extended Release 24 Hour"|"66016"|"Oligomenorrhea"|"2"|"0.25"  
"114955"|"MetFORMIN HCl 500 MG Oral Tablet Extended Release 24 Hour"|"69380"|"Diabetes Mellitus"|"134"|"0.280922"  
"114955"|"MetFORMIN HCl 500 MG Oral Tablet Extended Release 24 Hour"|"69381"|"Type II Diabetes Mellitus"|"131"|"0.388724"  
"114955"|"MetFORMIN HCl 500 MG Oral Tablet Extended Release 24 Hour"|"69382"|"Type II Diabetes Mellitus - Uncomplicated, Uncontrolled"|"22"|"0.366667"  
"114955"|"MetFORMIN HCl 500 MG Oral Tablet Extended Release 24 Hour"|"69388"|"Type I Diabetes Mellitus - Uncontrolled"|"6"|"0.285714"  
"114955"|"MetFORMIN HCl 500 MG Oral Tablet Extended Release 24 Hour"|"69401"|"Diabetes Mellitus Under Control"|"19"|"0.59375"  
"114955"|"MetFORMIN HCl 500 MG Oral Tablet Extended Release 24 Hour"|"69402"|"Diabetes Mellitus Poorly Controlled"|"224"|"0.732026"  
"114955"|"MetFORMIN HCl 500 MG Oral Tablet Extended Release 24 Hour"|"69461"|"Prediabetes"|"45"|"0.6"  
"114955"|"MetFORMIN HCl 500 MG Oral Tablet Extended Release 24 Hour"|"69549"|"Polycystic Ovarian Syndrome"|"144"|"0.822857"  
"114955"|"MetFORMIN HCl 500 MG Oral Tablet Extended Release 24 Hour"|"167265"|"Dysmetabolic Syndrome X"|"12"|"0.315789"  
"114955"|"MetFORMIN HCl 500 MG Oral Tablet Extended Release 24 Hour"|"258942"|"Type II Diabetes Mellitus - Uncomplicated, Controlled"|"4"|"0.153846"  
"114955"|"MetFORMIN HCl 500 MG Oral Tablet Extended Release 24 Hour"|"258964"|"Impaired Fasting Glucose"|"9"|"0.642857"  
"114955"|"MetFORMIN HCl 500 MG Oral Tablet Extended Release 24 Hour"|"258965"|"Impaired Glucose Tolerance Test"|"7"|"0.538462"  
"114955"|"MetFORMIN HCl 500 MG Oral Tablet Extended Release 24 Hour"|"258967"|"Hyperglycemia"|"3"|"0.157895"  
"114955"|"MetFORMIN HCl 500 MG Oral Tablet Extended Release 24 Hour"|"278297"|"Glucose Intolerance"|"4"|"0.307692"  
"114955"|"MetFORMIN HCl 500 MG Oral Tablet Extended Release 24 Hour"|"278396"|"Hirsutism"|"3"|"0.3"  
"114964"|"Ferrous Sulfate 75 (15 Fe) MG/0.6ML SOLN"|"77962"|"Anemia"|"4"|"0.571429"  
"114979"|"Mirtazapine 30 MG Oral Tablet Dispersible"|"76357"|"Major Depression, Recurrent"|"2"|"1"  
"114989"|"Butalbital-Aspirin-Caffeine 50-325-40 MG Oral Tablet"|"60828"|"Headache"|"2"|"1"  
"114990"|"Vitamin D 400 UNIT Oral Capsule"|"68058"|"Vitamin D Deficiency"|"3"|"0.5"  
"115012"|"Mercaptopurine 50 MG Oral Tablet"|"64980"|"Crohn's Disease"|"10"|"0.625"  
"115012"|"Mercaptopurine 50 MG Oral Tablet"|"65041"|"Ulcerative Colitis"|"8"|"1"  
"115013"|"Senna 8.6-50 MG Oral Tablet"|"166777"|"Constipation"|"2"|"1"  
"115022"|"Rythmol SR 325 MG Oral Capsule Extended Release 12 Hour"|"62916"|"Atrial Fibrillation"|"2"|"0.5"

"115027"|"Fosinopril Sodium 10 MG Oral Tablet"|"63467"|"Hypertension"|"2"|"0.285714"  
"115027"|"Fosinopril Sodium 10 MG Oral Tablet"|"63468"|"Essential Hypertension"|"3"|"0.5"  
"115047"|"Caduet 10-10 MG Oral Tablet"|"63468"|"Essential Hypertension"|"3"|"0.375"  
"115051"|"Propranolol HCl CR 120 MG Oral Capsule Extended Release 24 Hour"|"62916"|"Atrial  
Fibrillation"|"3"|"0.6"  
"115077"|"Hyoscyamine Sulfate 0.125 MG Sublingual Tablet Sublingual"|"60899"|"Abdominal Pain"|"20"|"0.714286"  
"115077"|"Hyoscyamine Sulfate 0.125 MG Sublingual Tablet Sublingual"|"64688"|"Esophageal Reflux"|"5"|"0.357143"  
"115077"|"Hyoscyamine Sulfate 0.125 MG Sublingual Tablet Sublingual"|"64980"|"Crohn's Disease"|"2"|"1"  
"115077"|"Hyoscyamine Sulfate 0.125 MG Sublingual Tablet Sublingual"|"65076"|"Irritable Bowel  
Syndrome"|"9"|"0.6"  
"115077"|"Hyoscyamine Sulfate 0.125 MG Sublingual Tablet Sublingual"|"87736"|"Abdominal Pain In The Central  
Upper Belly (Epigastric)"|"4"|"0.5"  
"115077"|"Hyoscyamine Sulfate 0.125 MG Sublingual Tablet Sublingual"|"87741"|"Abdominal Pain Around The Belly  
Button (Periumbilical)"|"3"|"0.5"  
"115077"|"Hyoscyamine Sulfate 0.125 MG Sublingual Tablet Sublingual"|"87743"|"Diffuse Abdominal  
Pain"|"12"|"0.857143"  
"115077"|"Hyoscyamine Sulfate 0.125 MG Sublingual Tablet Sublingual"|"87756"|"Abdominal Pain Feels Crampy /  
Colicky"|"2"|"1"  
"115077"|"Hyoscyamine Sulfate 0.125 MG Sublingual Tablet Sublingual"|"116203"|"Abdomen Tenderness Direct  
Diffuse"|"2"|"1"  
"115077"|"Hyoscyamine Sulfate 0.125 MG Sublingual Tablet Sublingual"|"166777"|"Constipation"|"2"|"0.222222"  
"115092"|"ReliOn 70/30 70-30 % SUSP"|"69402"|"Diabetes Mellitus Poorly Controlled"|"4"|"1"  
"115103"|"Caduet 5-10 MG Oral Tablet"|"63468"|"Essential Hypertension"|"2"|"1"  
"115123"|"NIFEdipine CR Osmotic 30 MG Oral Tablet Extended Release 24 Hour"|"62975"|"Coronary Artery  
Disease"|"7"|"0.148936"  
"115123"|"NIFEdipine CR Osmotic 30 MG Oral Tablet Extended Release 24  
Hour"|"63467"|"Hypertension"|"42"|"0.567568"  
"115123"|"NIFEdipine CR Osmotic 30 MG Oral Tablet Extended Release 24 Hour"|"63468"|"Essential  
Hypertension"|"14"|"0.56"  
"115123"|"NIFEdipine CR Osmotic 30 MG Oral Tablet Extended Release 24 Hour"|"63470"|"Benign Essential  
Hypertension"|"19"|"0.5"  
"115123"|"NIFEdipine CR Osmotic 30 MG Oral Tablet Extended Release 24 Hour"|"63759"|"Raynaud's  
Phenomenon"|"2"|"1"  
"115123"|"NIFEdipine CR Osmotic 30 MG Oral Tablet Extended Release 24 Hour"|"66386"|"Pregnancy Complicated  
By Hypertension - Antepartum Condition Or Prior Complicated Delivery"|"2"|"1"  
"115153"|"NIFEdipine CR Osmotic 60 MG Oral Tablet Extended Release 24  
Hour"|"63467"|"Hypertension"|"32"|"0.432432"  
"115153"|"NIFEdipine CR Osmotic 60 MG Oral Tablet Extended Release 24 Hour"|"63468"|"Essential  
Hypertension"|"16"|"0.551724"  
"115153"|"NIFEdipine CR Osmotic 60 MG Oral Tablet Extended Release 24 Hour"|"63470"|"Benign Essential  
Hypertension"|"11"|"0.458333"  
"115153"|"NIFEdipine CR Osmotic 60 MG Oral Tablet Extended Release 24 Hour"|"63759"|"Raynaud's  
Phenomenon"|"2"|"1"  
"115155"|"Nifediac CC 30 MG Oral Tablet Extended Release 24 Hour"|"63467"|"Hypertension"|"2"|"0.4"  
"115166"|"Prempro 0.3-1.5 MG Oral Tablet"|"60977"|"Menopause Has Occurred"|"5"|"0.5"  
"115166"|"Prempro 0.3-1.5 MG Oral Tablet"|"66073"|"Menopause"|"5"|"0.454545"  
"115166"|"Prempro 0.3-1.5 MG Oral Tablet"|"66076"|"Menopausal Disorder"|"2"|"0.5"  
"115166"|"Prempro 0.3-1.5 MG Oral Tablet"|"93473"|"Taking Female Hormones For Postmenopausal HRT"|"3"|"0.6"  
"115166"|"Prempro 0.3-1.5 MG Oral Tablet"|"195794"|"Symptomatic Menopause"|"4"|"0.666667"  
"115182"|"Tri-Sprintec 0.18/0.215/0.25 MG-35 MCG Oral Tablet"|"69549"|"Polycystic Ovarian Syndrome"|"6"|"1"  
"115182"|"Tri-Sprintec 0.18/0.215/0.25 MG-35 MCG Oral Tablet"|"187792"|"Gynecologic Services Contraceptive  
Management"|"7"|"0.636364"  
"115187"|"Mupirocin 2 % External Ointment"|"62586"|"Chronic Maxillary Sinusitis"|"5"|"0.416667"  
"115187"|"Mupirocin 2 % External Ointment"|"62587"|"Chronic Frontal Sinusitis"|"4"|"0.266667"

"115187"|"Mupirocin 2 % External Ointment"|"62588"|"Chronic Ethmoidal Sinusitis"|"4"|"0.266667"  
"115187"|"Mupirocin 2 % External Ointment"|"62619"|"Nasal Vestibulitis"|"2"|"0.666667"  
"115187"|"Mupirocin 2 % External Ointment"|"64750"|"Gastrostomy Infection"|"2"|"0.666667"  
"115187"|"Mupirocin 2 % External Ointment"|"65993"|"Nonpuerperal Breast Abscess"|"2"|"1"  
"115187"|"Mupirocin 2 % External Ointment"|"69402"|"Diabetes Mellitus Poorly Controlled"|"3"|"0.214286"  
"115187"|"Mupirocin 2 % External Ointment"|"69660"|"Chronic Cutaneous Ulcer"|"4"|"0.571429"  
"115187"|"Mupirocin 2 % External Ointment"|"69663"|"Decubitus Ulcer"|"2"|"0.5"  
"115187"|"Mupirocin 2 % External Ointment"|"69834"|"Ingrowing Nail With Infection"|"3"|"0.75"  
"115187"|"Mupirocin 2 % External Ointment"|"69847"|"Papular Urticaria"|"5"|"0.416667"  
"115187"|"Mupirocin 2 % External Ointment"|"69967"|"Bacterial Dermatological Conditions"|"3"|"0.6"  
"115187"|"Mupirocin 2 % External Ointment"|"69968"|"Carbuncle"|"5"|"0.416667"  
"115187"|"Mupirocin 2 % External Ointment"|"69999"|"Cellulitis"|"12"|"0.324324"  
"115187"|"Mupirocin 2 % External Ointment"|"70000"|"Facial Cellulitis"|"2"|"1"  
"115187"|"Mupirocin 2 % External Ointment"|"70010"|"Cellulitis Of The Trunk"|"2"|"0.666667"  
"115187"|"Mupirocin 2 % External Ointment"|"70027"|"Folliculitis"|"23"|"0.575"  
"115187"|"Mupirocin 2 % External Ointment"|"70029"|"Furuncle"|"5"|"0.384615"  
"115187"|"Mupirocin 2 % External Ointment"|"70031"|"Furuncle On The Face"|"2"|"1"  
"115187"|"Mupirocin 2 % External Ointment"|"70045"|"Furuncle On The Back"|"2"|"1"  
"115187"|"Mupirocin 2 % External Ointment"|"70050"|"Furuncle On The Buttock"|"3"|"0.375"  
"115187"|"Mupirocin 2 % External Ointment"|"70060"|"Impetigo"|"21"|"0.466667"  
"115187"|"Mupirocin 2 % External Ointment"|"70080"|"Skin Abscess"|"5"|"0.333333"  
"115187"|"Mupirocin 2 % External Ointment"|"70081"|"Skin Abscess Of The Face"|"3"|"0.75"  
"115187"|"Mupirocin 2 % External Ointment"|"70094"|"Skin Abscess Of The Buttocks"|"2"|"0.285714"  
"115187"|"Mupirocin 2 % External Ointment"|"70130"|"Diaper Rash"|"8"|"0.186047"  
"115187"|"Mupirocin 2 % External Ointment"|"76754"|"Varicella"|"2"|"0.5"  
"115187"|"Mupirocin 2 % External Ointment"|"76759"|"Hand Foot & Mouth Disease"|"2"|"0.666667"  
"115187"|"Mupirocin 2 % External Ointment"|"76835"|"HIV Infection"|"2"|"0.222222"  
"115187"|"Mupirocin 2 % External Ointment"|"81252"|"Abrasion Of The Face"|"2"|"1"  
"115187"|"Mupirocin 2 % External Ointment"|"81336"|"Infected Nonvenomous Insect Bite"|"4"|"0.5"  
"115187"|"Mupirocin 2 % External Ointment"|"81584"|"Burns"|"2"|"0.4"  
"115187"|"Mupirocin 2 % External Ointment"|"83137"|"Nonvenomous Insect Bite"|"3"|"0.375"  
"115187"|"Mupirocin 2 % External Ointment"|"93705"|"Dermatitis"|"6"|"0.166667"  
"115187"|"Mupirocin 2 % External Ointment"|"124553"|"Pustules"|"5"|"0.625"  
"115187"|"Mupirocin 2 % External Ointment"|"191631"|"Gastrostomy Care"|"7"|"0.35"  
"115187"|"Mupirocin 2 % External Ointment"|"278350"|"Eczema"|"11"|"0.144737"  
"115187"|"Mupirocin 2 % External Ointment"|"278541"|"Furuncle On The Breast"|"2"|"1"  
"115187"|"Mupirocin 2 % External Ointment"|"278552"|"Furunculosis"|"8"|"0.888889"  
"115187"|"Mupirocin 2 % External Ointment"|"278570"|"Furuncle On The Left Thigh"|"2"|"1"  
"115187"|"Mupirocin 2 % External Ointment"|"278576"|"Bullous Impetigo"|"2"|"0.666667"  
"115187"|"Mupirocin 2 % External Ointment"|"278634"|"Skin Abscess Of The Right Buttock"|"2"|"0.666667"  
"115187"|"Mupirocin 2 % External Ointment"|"284282"|"Blister"|"2"|"1"  
"115187"|"Mupirocin 2 % External Ointment"|"291776"|"Vulvar Furuncle"|"2"|"1"  
"115187"|"Mupirocin 2 % External Ointment"|"293641"|"Methicillin Resistant Staphylococcus Aureus  
Infection"|"4"|"0.4"  
"115201"|"Loratadine-D 24HR 10-240 MG Oral Tablet Extended Release 24 Hour"|"62598"|"Allergic  
Rhinitis"|"2"|"0.333333"  
"115201"|"Loratadine-D 24HR 10-240 MG Oral Tablet Extended Release 24 Hour"|"77891"|"Acute Upper Respiratory  
Infection"|"5"|"0.625"  
"115213"|"Climara Pro 0.045-0.015 MG/DAY Transdermal Patch Weekly"|"195794"|"Symptomatic  
Menopause"|"2"|"0.5"  
"115214"|"NIFEdipine CR Osmotic 90 MG Oral Tablet Extended Release 24 Hour"|"62975"|"Coronary Artery  
Disease"|"8"|"0.150943"  
"115214"|"NIFEdipine CR Osmotic 90 MG Oral Tablet Extended Release 24  
Hour"|"63467"|"Hypertension"|"40"|"0.421053"

"115214"|"NIFEdipine CR Osmotic 90 MG Oral Tablet Extended Release 24 Hour"|"63468"|"Essential Hypertension"|"16"|"0.333333"  
"115214"|"NIFEdipine CR Osmotic 90 MG Oral Tablet Extended Release 24 Hour"|"63470"|"Benign Essential Hypertension"|"16"|"0.470588"  
"115214"|"NIFEdipine CR Osmotic 90 MG Oral Tablet Extended Release 24 Hour"|"63471"|"Accelerated Essential Hypertension"|"2"|"0.666667"  
"115214"|"NIFEdipine CR Osmotic 90 MG Oral Tablet Extended Release 24 Hour"|"63758"|"Raynaud's Disease"|"2"|"0.666667"  
"115214"|"NIFEdipine CR Osmotic 90 MG Oral Tablet Extended Release 24 Hour"|"70475"|"Scleroderma"|"2"|"0.5"  
"115246"|"Pen Needles 1/2"29G X 12MM Miscellaneous"|"69380"|"Diabetes Mellitus"|"6"|"0.166667"  
"115246"|"Pen Needles 1/2"29G X 12MM Miscellaneous"|"69381"|"Type II Diabetes Mellitus"|"4"|"0.173913"  
"115246"|"Pen Needles 1/2"29G X 12MM Miscellaneous"|"69402"|"Diabetes Mellitus Poorly Controlled"|"28"|"0.8"  
"115247"|"Procardia XL 30 MG Oral Tablet Extended Release 24 Hour"|"63467"|"Hypertension"|"3"|"0.230769"  
"115247"|"Procardia XL 30 MG Oral Tablet Extended Release 24 Hour"|"63468"|"Essential Hypertension"|"2"|"0.333333"  
"115247"|"Procardia XL 30 MG Oral Tablet Extended Release 24 Hour"|"63470"|"Benign Essential Hypertension"|"3"|"0.428571"  
"115249"|"Cialis 20 MG Oral Tablet"|"69402"|"Diabetes Mellitus Poorly Controlled"|"2"|"0.2"  
"115249"|"Cialis 20 MG Oral Tablet"|"76651"|"Male Erectile Disorder"|"78"|"0.866667"  
"115249"|"Cialis 20 MG Oral Tablet"|"76661"|"Male Erectile Disorder Due To Physical Condition"|"6"|"1"  
"115249"|"Cialis 20 MG Oral Tablet"|"168513"|"Hypogonadotropic Hypogonadism"|"3"|"1"  
"115254"|"Loratadine Allergy Relief 10 MG Oral Tablet Dispersible"|"62598"|"Allergic Rhinitis"|"6"|"0.6"  
"115277"|"Ketoconazole 2 % External Shampoo"|"69923"|"Seborrhea"|"2"|"0.4"  
"115277"|"Ketoconazole 2 % External Shampoo"|"70115"|"Dermatophytosis"|"2"|"0.222222"  
"115277"|"Ketoconazole 2 % External Shampoo"|"70116"|"Tinea Capitis"|"27"|"0.55102"  
"115277"|"Ketoconazole 2 % External Shampoo"|"70124"|"Tinea Corporis"|"5"|"0.277778"  
"115277"|"Ketoconazole 2 % External Shampoo"|"70126"|"Tinea Versicolor"|"6"|"0.75"  
"115277"|"Ketoconazole 2 % External Shampoo"|"70134"|"Seborrhea Capitis"|"12"|"0.857143"  
"115277"|"Ketoconazole 2 % External Shampoo"|"70135"|"Seborrheic Dermatitis"|"8"|"0.5"  
"115277"|"Ketoconazole 2 % External Shampoo"|"70136"|"Seborrheic Dermatitis Of The Scalp"|"5"|"0.555556"  
"115277"|"Ketoconazole 2 % External Shampoo"|"93705"|"Dermatitis"|"3"|"0.375"  
"115286"|"Mucinex 600 MG Oral Tablet Extended Release 12 Hour"|"60869"|"Cough"|"10"|"0.4"  
"115286"|"Mucinex 600 MG Oral Tablet Extended Release 12 Hour"|"62578"|"Acute Sinusitis"|"3"|"0.214286"  
"115286"|"Mucinex 600 MG Oral Tablet Extended Release 12 Hour"|"64118"|"Acute Bronchitis"|"5"|"0.454545"  
"115286"|"Mucinex 600 MG Oral Tablet Extended Release 12 Hour"|"77891"|"Acute Upper Respiratory Infection"|"13"|"0.481481"  
"115286"|"Mucinex 600 MG Oral Tablet Extended Release 12 Hour"|"87587"|"Coughing Up Sputum Yellow"|"2"|"0.4"  
"115300"|"Fosinopril Sodium 40 MG Oral Tablet"|"63467"|"Hypertension"|"6"|"0.375"  
"115300"|"Fosinopril Sodium 40 MG Oral Tablet"|"63468"|"Essential Hypertension"|"8"|"0.615385"  
"115300"|"Fosinopril Sodium 40 MG Oral Tablet"|"63470"|"Benign Essential Hypertension"|"2"|"0.5"  
"115305"|"Zomig 5 MG Nasal Solution"|"74533"|"Migraine Headache"|"3"|"0.428571"  
"115305"|"Zomig 5 MG Nasal Solution"|"74534"|"Classic Migraine (With Aura)"|"3"|"0.75"  
"115308"|"Metoprolol Tartrate 25 MG Oral Tablet"|"62891"|"Rhythm Disorder"|"2"|"0.25"  
"115308"|"Metoprolol Tartrate 25 MG Oral Tablet"|"62902"|"Supraventricular Tachycardia"|"5"|"0.454545"  
"115308"|"Metoprolol Tartrate 25 MG Oral Tablet"|"62916"|"Atrial Fibrillation"|"10"|"0.15873"  
"115308"|"Metoprolol Tartrate 25 MG Oral Tablet"|"62975"|"Coronary Artery Disease"|"22"|"0.177419"  
"115308"|"Metoprolol Tartrate 25 MG Oral Tablet"|"62987"|"Angina Pectoris"|"2"|"0.4"  
"115308"|"Metoprolol Tartrate 25 MG Oral Tablet"|"63217"|"Congestive Heart Failure"|"5"|"0.131579"  
"115308"|"Metoprolol Tartrate 25 MG Oral Tablet"|"63467"|"Hypertension"|"83"|"0.298561"  
"115308"|"Metoprolol Tartrate 25 MG Oral Tablet"|"63468"|"Essential Hypertension"|"35"|"0.353535"  
"115308"|"Metoprolol Tartrate 25 MG Oral Tablet"|"63470"|"Benign Essential Hypertension"|"44"|"0.494382"  
"115308"|"Metoprolol Tartrate 25 MG Oral Tablet"|"63471"|"Accelerated Essential Hypertension"|"2"|"0.285714"  
"115308"|"Metoprolol Tartrate 25 MG Oral Tablet"|"250579"|"Blood Pressure Isolated Elevated"|"3"|"0.428571"  
"115308"|"Metoprolol Tartrate 25 MG Oral Tablet"|"250918"|"Chronic Systolic Congestive Heart Failure"|"2"|"1"

"115308"|"Metoprolol Tartrate 25 MG Oral Tablet"|"282270"|"Palpitations"|"8"|"0.363636"  
"115314"|"DynaCirc CR 5 MG Oral Tablet Extended Release 24 Hour"|"63467"|"Hypertension"|"3"|"0.75"  
"115326"|"Nifedical XL 60 MG Oral Tablet Extended Release 24 Hour"|"62975"|"Coronary Artery  
Disease"|"3"|"0.1875"  
"115326"|"Nifedical XL 60 MG Oral Tablet Extended Release 24 Hour"|"63467"|"Hypertension"|"9"|"0.25"  
"115326"|"Nifedical XL 60 MG Oral Tablet Extended Release 24 Hour"|"63468"|"Essential  
Hypertension"|"6"|"0.461538"  
"115332"|"Lexapro 5 MG Oral Tablet"|"61118"|"Anxiety (Symptom)"|"4"|"0.4"  
"115332"|"Lexapro 5 MG Oral Tablet"|"76351"|"Depression"|"16"|"0.533333"  
"115332"|"Lexapro 5 MG Oral Tablet"|"76357"|"Major Depression, Recurrent"|"2"|"0.5"  
"115332"|"Lexapro 5 MG Oral Tablet"|"76388"|"Bipolar Disorder NOS"|"2"|"1"  
"115332"|"Lexapro 5 MG Oral Tablet"|"76536"|"Generalized Anxiety Disorder"|"3"|"0.5"  
"115345"|"Ovidrel 250 MCG/0.5ML Subcutaneous Injectable"|"66015"|"Ovarian Disorders"|"3"|"1"  
"115345"|"Ovidrel 250 MCG/0.5ML Subcutaneous Injectable"|"66274"|"Female Infertility"|"11"|"0.916667"  
"115345"|"Ovidrel 250 MCG/0.5ML Subcutaneous Injectable"|"69549"|"Polycystic Ovarian  
Syndrome"|"15"|"0.789474"  
"115345"|"Ovidrel 250 MCG/0.5ML Subcutaneous Injectable"|"288778"|"Female Infertility Associated With  
Anovulation"|"2"|"0.5"  
"115348"|"Pen Needles 5/16\31G X 8 MM Miscellaneous"|"67687"|"Growth Hormone Deficiency (Pituitary  
Dwarfism)"|"3"|"1"  
"115348"|"Pen Needles 5/16\31G X 8 MM Miscellaneous"|"67803"|"Turner Syndrome"|"2"|"1"  
"115348"|"Pen Needles 5/16\31G X 8 MM Miscellaneous"|"69380"|"Diabetes Mellitus"|"13"|"0.119266"  
"115348"|"Pen Needles 5/16\31G X 8 MM Miscellaneous"|"69381"|"Type II Diabetes Mellitus"|"14"|"0.179487"  
"115348"|"Pen Needles 5/16\31G X 8 MM Miscellaneous"|"69387"|"Type I Diabetes Mellitus"|"3"|"0.272727"  
"115348"|"Pen Needles 5/16\31G X 8 MM Miscellaneous"|"69388"|"Type I Diabetes Mellitus -  
Uncontrolled"|"18"|"0.692308"  
"115348"|"Pen Needles 5/16\31G X 8 MM Miscellaneous"|"69402"|"Diabetes Mellitus Poorly  
Controlled"|"88"|"0.758621"  
"115357"|"Selenium Sulfide 2.5 % External Lotion"|"70126"|"Tinea Versicolor"|"8"|"0.666667"  
"115358"|"Nifedical XL 30 MG Oral Tablet Extended Release 24 Hour"|"63467"|"Hypertension"|"4"|"0.2"  
"115358"|"Nifedical XL 30 MG Oral Tablet Extended Release 24 Hour"|"63468"|"Essential Hypertension"|"3"|"0.25"  
"115358"|"Nifedical XL 30 MG Oral Tablet Extended Release 24 Hour"|"63470"|"Benign Essential  
Hypertension"|"4"|"0.4"  
"115358"|"Nifedical XL 30 MG Oral Tablet Extended Release 24 Hour"|"63758"|"Raynaud's Disease"|"4"|"0.5"  
"115358"|"Nifedical XL 30 MG Oral Tablet Extended Release 24 Hour"|"70475"|"Scleroderma"|"2"|"0.222222"  
"115362"|"GlipiZIDE 10 MG Oral Tablet Extended Release 24 Hour"|"69380"|"Diabetes Mellitus"|"11"|"0.354839"  
"115362"|"GlipiZIDE 10 MG Oral Tablet Extended Release 24 Hour"|"69381"|"Type II Diabetes Mellitus"|"13"|"0.52"  
"115362"|"GlipiZIDE 10 MG Oral Tablet Extended Release 24 Hour"|"69382"|"Type II Diabetes Mellitus -  
Uncomplicated, Uncontrolled"|"9"|"0.692308"  
"115362"|"GlipiZIDE 10 MG Oral Tablet Extended Release 24 Hour"|"69402"|"Diabetes Mellitus Poorly  
Controlled"|"8"|"0.380952"  
"115368"|"Nitrofurantoin Monohyd Macro 100 MG Oral Capsule"|"60928"|"Pain During Urination  
(Dysuria)"|"6"|"0.272727"  
"115368"|"Nitrofurantoin Monohyd Macro 100 MG Oral Capsule"|"65752"|"Cystitis"|"6"|"0.26087"  
"115368"|"Nitrofurantoin Monohyd Macro 100 MG Oral Capsule"|"65753"|"Acute Cystitis"|"10"|"0.47619"  
"115368"|"Nitrofurantoin Monohyd Macro 100 MG Oral Capsule"|"65755"|"Chronic Cystitis"|"3"|"0.5"  
"115368"|"Nitrofurantoin Monohyd Macro 100 MG Oral Capsule"|"65762"|"Urinary Tract Infection"|"306"|"0.892128"  
"115368"|"Nitrofurantoin Monohyd Macro 100 MG Oral Capsule"|"65764"|"Urinary Tract Infection, Geriatric  
Presentation"|"4"|"1"  
"115368"|"Nitrofurantoin Monohyd Macro 100 MG Oral Capsule"|"65846"|"Urethra Disorders"|"3"|"0.75"  
"115368"|"Nitrofurantoin Monohyd Macro 100 MG Oral Capsule"|"66073"|"Menopause"|"2"|"0.25"  
"115368"|"Nitrofurantoin Monohyd Macro 100 MG Oral Capsule"|"66495"|"Pregnancy Complicated By Genitourinary  
Tract Infection"|"2"|"0.666667"  
"115368"|"Nitrofurantoin Monohyd Macro 100 MG Oral Capsule"|"283037"|"Hematuria"|"3"|"0.3"

"115368"|"Nitrofurantoin Monohyd Macro 100 MG Oral Capsule"|"283048"|"Subacute Cystitis"|"5"|"1"  
"115368"|"Nitrofurantoin Monohyd Macro 100 MG Oral Capsule"|"296638"|"Urinary Incontinence"|"3"|"0.272727"  
"115372"|"Namenda 5 MG Oral Tablet"|"61048"|"Memory Lapses Or Loss"|"9"|"0.692308"  
"115372"|"Namenda 5 MG Oral Tablet"|"75020"|"Alzheimer's Disease"|"6"|"0.352941"  
"115372"|"Namenda 5 MG Oral Tablet"|"75032"|"Vascular Dementia"|"4"|"0.5"  
"115372"|"Namenda 5 MG Oral Tablet"|"163528"|"Speech Language Dysphasia / Aphasia"|"2"|"0.666667"  
"115372"|"Namenda 5 MG Oral Tablet"|"163751"|"Cognitive Functions Current Level Impaired"|"2"|"0.5"  
"115372"|"Namenda 5 MG Oral Tablet"|"251600"|"Dementia"|"20"|"0.540541"  
"115372"|"Namenda 5 MG Oral Tablet"|"252575"|"Dementia With Lewy Bodies"|"6"|"0.75"  
"115372"|"Namenda 5 MG Oral Tablet"|"292509"|"Multisystem Atrophy"|"2"|"1"  
"115380"|"Fosamax 70 MG/75ML SOLN"|"69341"|"Osteoporosis"|"2"|"0.666667"  
"115397"|"BuPROPion HCl 100 MG Oral Tablet Extended Release 12 Hour"|"76351"|"Depression"|"8"|"0.666667"  
"115397"|"BuPROPion HCl 100 MG Oral Tablet Extended Release 12 Hour"|"76679"|"Adjustment Disorder"|"2"|"1"  
"115409"|"Propranolol HCl CR 60 MG Oral Capsule Extended Release 24  
Hour"|"63467"|"Hypertension"|"4"|"0.153846"  
"115409"|"Propranolol HCl CR 60 MG Oral Capsule Extended Release 24 Hour"|"63468"|"Essential  
Hypertension"|"2"|"0.25"  
"115409"|"Propranolol HCl CR 60 MG Oral Capsule Extended Release 24 Hour"|"74533"|"Migraine  
Headache"|"7"|"0.466667"  
"115409"|"Propranolol HCl CR 60 MG Oral Capsule Extended Release 24 Hour"|"74534"|"Classic Migraine (With  
Aura)"|"2"|"0.25"  
"115409"|"Propranolol HCl CR 60 MG Oral Capsule Extended Release 24 Hour"|"74537"|"Common Migraine  
(Without Aura)"|"5"|"0.5"  
"115415"|"Budeprion SR 150 MG Oral Tablet Extended Release 12 Hour"|"76351"|"Depression"|"3"|"0.375"  
"115417"|"Folbee 2.5-25-1 MG Oral Tablet"|"62975"|"Coronary Artery Disease"|"2"|"0.222222"  
"115417"|"Folbee 2.5-25-1 MG Oral Tablet"|"257896"|"Homocysteinemia"|"3"|"0.75"  
"115422"|"Glucotrol XL 5 MG Oral Tablet Extended Release 24 Hour"|"69381"|"Type II Diabetes Mellitus"|"2"|"1"  
"115431"|"Cytra-3 550-500-334 MG/5ML Oral Syrup"|"65655"|"Renal Tubular Acidosis"|"2"|"1"  
"115433"|"Testosterone Enanthate 200 MG/ML Intramuscular Oil"|"69588"|"Hypogonadism"|"4"|"0.8"  
"115433"|"Testosterone Enanthate 200 MG/ML Intramuscular Oil"|"168513"|"Hypogonadotrophic  
Hypogonadism"|"5"|"0.833333"  
"115437"|"Inderal LA 60 MG Oral Capsule Extended Release 24 Hour"|"74529"|"Headache  
Syndromes"|"2"|"0.666667"  
"115445"|"Chlorpheniramine-Pseudoeph 8-120 MG Oral Capsule Extended Release"|"62578"|"Acute Sinusitis"|"3"|"1"  
"115450"|"GliPiZIDE 5 MG Oral Tablet Extended Release 24 Hour"|"69380"|"Diabetes Mellitus"|"7"|"0.411765"  
"115450"|"GliPiZIDE 5 MG Oral Tablet Extended Release 24 Hour"|"69402"|"Diabetes Mellitus Poorly  
Controlled"|"2"|"0.5"  
"115454"|"Fosinopril Sodium 20 MG Oral Tablet"|"63467"|"Hypertension"|"4"|"0.444444"  
"115454"|"Fosinopril Sodium 20 MG Oral Tablet"|"63468"|"Essential Hypertension"|"6"|"0.5"  
"115463"|"GliPiZIDE 2.5 MG Oral Tablet Extended Release 24 Hour"|"69380"|"Diabetes Mellitus"|"11"|"0.407407"  
"115463"|"GliPiZIDE 2.5 MG Oral Tablet Extended Release 24 Hour"|"69381"|"Type II Diabetes Mellitus"|"3"|"0.5"  
"115463"|"GliPiZIDE 2.5 MG Oral Tablet Extended Release 24 Hour"|"69402"|"Diabetes Mellitus Poorly  
Controlled"|"4"|"0.571429"  
"115479"|"BuPROPion HCl 150 MG Oral Tablet Extended Release 12 Hour"|"75125"|"Multiple  
Sclerosis"|"3"|"0.333333"  
"115479"|"BuPROPion HCl 150 MG Oral Tablet Extended Release 12 Hour"|"75819"|"ADHD, Predominantly  
Inattentive Type"|"2"|"0.4"  
"115479"|"BuPROPion HCl 150 MG Oral Tablet Extended Release 12 Hour"|"76090"|"Nicotine  
Dependence"|"7"|"0.388889"  
"115479"|"BuPROPion HCl 150 MG Oral Tablet Extended Release 12 Hour"|"76306"|"Episodic Mood  
Disorders"|"5"|"1"  
"115479"|"BuPROPion HCl 150 MG Oral Tablet Extended Release 12 Hour"|"76351"|"Depression"|"26"|"0.509804"  
"115479"|"BuPROPion HCl 150 MG Oral Tablet Extended Release 12 Hour"|"76352"|"Major Depression, Single  
Episode"|"5"|"1"

"115479"|"BuPROPion HCl 150 MG Oral Tablet Extended Release 12 Hour"|"76357"|"Major Depression, Recurrent"|"4"|"0.5"

"115479"|"BuPROPion HCl 150 MG Oral Tablet Extended Release 12 Hour"|"76361"|"Moderate Recurrent Major Depression"|"2"|"0.285714"

"115479"|"BuPROPion HCl 150 MG Oral Tablet Extended Release 12 Hour"|"196089"|"Adjustment Disorder With Anxiety And Depressed Mood"|"3"|"1"

"115491"|"Docusate Sodium 50 MG/5ML Oral Liquid"|"65055"|"Chronic Constipation"|"2"|"1"

"115491"|"Docusate Sodium 50 MG/5ML Oral Liquid"|"166777"|"Constipation"|"3"|"0.5"

"115498"|"Caduet 10-20 MG Oral Tablet"|"62975"|"Coronary Artery Disease"|"2"|"0.666667"

"115498"|"Caduet 10-20 MG Oral Tablet"|"63467"|"Hypertension"|"3"|"0.25"

"115498"|"Caduet 10-20 MG Oral Tablet"|"63470"|"Benign Essential Hypertension"|"4"|"0.571429"

"115528"|"Benazepril-Hydrochlorothiazide 10-12.5 MG Oral Tablet"|"63470"|"Benign Essential Hypertension"|"2"|"0.666667"

"115537"|"Caduet 10-40 MG Oral Tablet"|"63467"|"Hypertension"|"3"|"0.333333"

"115537"|"Caduet 10-40 MG Oral Tablet"|"63468"|"Essential Hypertension"|"3"|"1"

"115549"|"Namenda Titration Pak 5 (28)-10 (21) MG Oral Tablet"|"61048"|"Memory Lapses Or Loss"|"7"|"0.538462"

"115549"|"Namenda Titration Pak 5 (28)-10 (21) MG Oral Tablet"|"75020"|"Alzheimer's Disease"|"2"|"0.222222"

"115549"|"Namenda Titration Pak 5 (28)-10 (21) MG Oral Tablet"|"75032"|"Vascular Dementia"|"3"|"1"

"115549"|"Namenda Titration Pak 5 (28)-10 (21) MG Oral Tablet"|"251600"|"Dementia"|"5"|"0.454545"

"115549"|"Namenda Titration Pak 5 (28)-10 (21) MG Oral Tablet"|"252573"|"Frontotemporal Dementia"|"4"|"0.8"

"115549"|"Namenda Titration Pak 5 (28)-10 (21) MG Oral Tablet"|"252575"|"Dementia With Lewy Bodies"|"3"|"1"

"115559"|"Benazepril HCl 40 MG Oral Tablet"|"63467"|"Hypertension"|"9"|"0.375"

"115559"|"Benazepril HCl 40 MG Oral Tablet"|"63468"|"Essential Hypertension"|"5"|"0.3125"

"115559"|"Benazepril HCl 40 MG Oral Tablet"|"63470"|"Benign Essential Hypertension"|"4"|"0.444444"

"115574"|"Benazepril-Hydrochlorothiazide 20-25 MG Oral Tablet"|"63467"|"Hypertension"|"7"|"0.583333"

"115574"|"Benazepril-Hydrochlorothiazide 20-25 MG Oral Tablet"|"63468"|"Essential Hypertension"|"2"|"0.4"

"115574"|"Benazepril-Hydrochlorothiazide 20-25 MG Oral Tablet"|"63470"|"Benign Essential Hypertension"|"3"|"0.428571"

"115577"|"Budeprion SR 100 MG Oral Tablet Extended Release 12 Hour"|"76348"|"Bipolar II Disorder"|"2"|"1"

"115577"|"Budeprion SR 100 MG Oral Tablet Extended Release 12 Hour"|"76351"|"Depression"|"5"|"0.625"

"115577"|"Budeprion SR 100 MG Oral Tablet Extended Release 12 Hour"|"76536"|"Generalized Anxiety Disorder"|"2"|"0.666667"

"115581"|"Myfortic 180 MG Oral Tablet Delayed Release"|"70475"|"Scleroderma"|"2"|"1"

"115601"|"Cialis 5 MG Oral Tablet"|"76651"|"Male Erectile Disorder"|"17"|"0.708333"

"115601"|"Cialis 5 MG Oral Tablet"|"76661"|"Male Erectile Disorder Due To Physical Condition"|"2"|"1"

"116112"|"Viracept 625 MG Oral Tablet"|"76835"|"HIV Infection"|"6"|"0.666667"

"116112"|"Viracept 625 MG Oral Tablet"|"76842"|"Acquired Immunodeficiency Syndrome (AIDS)"|"2"|"0.666667"

"116148"|"Melatonin 1 MG/4ML Oral Liquid"|"61103"|"Sleep Disturbances"|"2"|"1"

"116148"|"Melatonin 1 MG/4ML Oral Liquid"|"61108"|"Insomnia"|"2"|"1"

"116151"|"BD Pen Needle Mini U/F 31G X 5 MM Miscellaneous"|"69380"|"Diabetes Mellitus"|"7"|"0.269231"

"116151"|"BD Pen Needle Mini U/F 31G X 5 MM Miscellaneous"|"69381"|"Type II Diabetes Mellitus"|"10"|"0.416667"

"116151"|"BD Pen Needle Mini U/F 31G X 5 MM Miscellaneous"|"69388"|"Type I Diabetes Mellitus - Uncontrolled"|"4"|"0.8"

"116151"|"BD Pen Needle Mini U/F 31G X 5 MM Miscellaneous"|"69401"|"Diabetes Mellitus Under Control"|"2"|"1"

"116151"|"BD Pen Needle Mini U/F 31G X 5 MM Miscellaneous"|"69402"|"Diabetes Mellitus Poorly Controlled"|"11"|"0.611111"

"122510"|"BD Insulin Syringe Ultrafine 31G X 5/16\0.5 ML Miscellaneous"|"69380"|"Diabetes Mellitus"|"4"|"0.25"

"122510"|"BD Insulin Syringe Ultrafine 31G X 5/16\0.5 ML Miscellaneous"|"69381"|"Type II Diabetes Mellitus"|"2"|"0.25"

"122510"|"BD Insulin Syringe Ultrafine 31G X 5/16\0.5 ML Miscellaneous"|"69387"|"Type I Diabetes Mellitus"|"2"|"0.25"

"122510"|"BD Insulin Syringe Ultrafine 31G X 5/16\0.5 ML Miscellaneous"|"69388"|"Type I Diabetes Mellitus - Uncontrolled"|"4"|"1"

"122510"|"BD Insulin Syringe Ultrafine 31G X 5/16\|0.5 ML Miscellaneous"|"69402"|"Diabetes Mellitus Poorly Controlled"|"6"|"0.5"

"122512"|"Norditropin NordiFlex Pen 15 MG/1.5ML SOLN"|"292025"|"Short Stature"|"2"|"0.5"

"122516"|"Quinapril HCl 40 MG Oral Tablet"|"63467"|"Hypertension"|"9"|"0.209302"

"122516"|"Quinapril HCl 40 MG Oral Tablet"|"63468"|"Essential Hypertension"|"11"|"0.478261"

"122516"|"Quinapril HCl 40 MG Oral Tablet"|"63470"|"Benign Essential Hypertension"|"11"|"0.6875"

"122517"|"Cymbalta 30 MG Oral Capsule Delayed Release Particles"|"61118"|"Anxiety (Symptom)"|"3"|"0.107143"

"122517"|"Cymbalta 30 MG Oral Capsule Delayed Release Particles"|"75002"|"Partial Complex Psychomotor Seizure With Intractable Seizure"|"3"|"0.375"

"122517"|"Cymbalta 30 MG Oral Capsule Delayed Release Particles"|"75124"|"Demyelinating Disorders"|"2"|"0.285714"

"122517"|"Cymbalta 30 MG Oral Capsule Delayed Release Particles"|"75764"|"Neuralgia"|"2"|"0.333333"

"122517"|"Cymbalta 30 MG Oral Capsule Delayed Release Particles"|"75812"|"Myalgia And Myositis"|"4"|"0.333333"

"122517"|"Cymbalta 30 MG Oral Capsule Delayed Release Particles"|"75929"|"Mood Disorder Due To General Medical Condition"|"2"|"0.666667"

"122517"|"Cymbalta 30 MG Oral Capsule Delayed Release Particles"|"76272"|"Schizoaffective Disorder"|"2"|"0.5"

"122517"|"Cymbalta 30 MG Oral Capsule Delayed Release Particles"|"76325"|"Bipolar I Disorder, Most Recent Episode, Mixed - Moderate"|"3"|"1"

"122517"|"Cymbalta 30 MG Oral Capsule Delayed Release Particles"|"76343"|"Bipolar I Disorder, Most Recent Episode, Depressed - Moderate"|"2"|"0.666667"

"122517"|"Cymbalta 30 MG Oral Capsule Delayed Release Particles"|"76351"|"Depression"|"52"|"0.490566"

"122517"|"Cymbalta 30 MG Oral Capsule Delayed Release Particles"|"76357"|"Major Depression, Recurrent"|"11"|"0.55"

"122517"|"Cymbalta 30 MG Oral Capsule Delayed Release Particles"|"76361"|"Moderate Recurrent Major Depression"|"6"|"0.75"

"122517"|"Cymbalta 30 MG Oral Capsule Delayed Release Particles"|"76536"|"Generalized Anxiety Disorder"|"8"|"0.571429"

"122517"|"Cymbalta 30 MG Oral Capsule Delayed Release Particles"|"76537"|"Panic Disorder Without Agoraphobia"|"3"|"0.230769"

"122517"|"Cymbalta 30 MG Oral Capsule Delayed Release Particles"|"76587"|"Anxiety Disorder NOS"|"3"|"0.3"

"122517"|"Cymbalta 30 MG Oral Capsule Delayed Release Particles"|"76610"|"Chronic Pain Syndrome"|"2"|"0.222222"

"122517"|"Cymbalta 30 MG Oral Capsule Delayed Release Particles"|"91089"|"Lower Back Pain"|"4"|"0.173913"

"122517"|"Cymbalta 30 MG Oral Capsule Delayed Release Particles"|"196089"|"Adjustment Disorder With Anxiety And Depressed Mood"|"2"|"0.285714"

"122517"|"Cymbalta 30 MG Oral Capsule Delayed Release Particles"|"251627"|"Adjustment Disorder With Depressed Mood"|"2"|"0.666667"

"122517"|"Cymbalta 30 MG Oral Capsule Delayed Release Particles"|"275592"|"Post-traumatic Stress Disorder"|"4"|"0.363636"

"122517"|"Cymbalta 30 MG Oral Capsule Delayed Release Particles"|"275604"|"Depression With Anxiety"|"4"|"0.5"

"122517"|"Cymbalta 30 MG Oral Capsule Delayed Release Particles"|"288921"|"Chronic Pain"|"5"|"0.227273"

"122517"|"Cymbalta 30 MG Oral Capsule Delayed Release Particles"|"288933"|"Peripheral Neuropathy"|"3"|"0.166667"

"122517"|"Cymbalta 30 MG Oral Capsule Delayed Release Particles"|"288977"|"Fibromyalgia"|"14"|"0.388889"

"122520"|"Citalopram Hydrobromide 40 MG Oral Tablet"|"30261"|"Bipolar I Disorder, Most Recent Episode, Depressed - Severe With Psychotic Features"|"3"|"1"

"122520"|"Citalopram Hydrobromide 40 MG Oral Tablet"|"61118"|"Anxiety (Symptom)"|"3"|"0.2"

"122520"|"Citalopram Hydrobromide 40 MG Oral Tablet"|"76232"|"Paranoid Schizophrenia"|"2"|"1"

"122520"|"Citalopram Hydrobromide 40 MG Oral Tablet"|"76272"|"Schizoaffective Disorder"|"2"|"1"

"122520"|"Citalopram Hydrobromide 40 MG Oral Tablet"|"76307"|"Bipolar Disorder"|"2"|"0.333333"

"122520"|"Citalopram Hydrobromide 40 MG Oral Tablet"|"76351"|"Depression"|"41"|"0.539474"

"122520"|"Citalopram Hydrobromide 40 MG Oral Tablet"|"76352"|"Major Depression, Single Episode"|"2"|"1"

"122520"|"Citalopram Hydrobromide 40 MG Oral Tablet"|"76357"|"Major Depression, Recurrent"|"13"|"0.928571"

"122520"|"Citalopram Hydrobromide 40 MG Oral Tablet"|"76361"|"Moderate Recurrent Major Depression"|"7"|"1"

"122520"|"Citalopram Hydrobromide 40 MG Oral Tablet"|"76363"|"Major Depression, Recurrent With Psychotic Features"|"2"|"1"

"122520"|"Citalopram Hydrobromide 40 MG Oral Tablet"|"76364"|"Recurrent Major Depression In Partial Remission"|"2"|"0.4"

"122520"|"Citalopram Hydrobromide 40 MG Oral Tablet"|"76365"|"Recurrent Major Depression In Full Remission"|"2"|"0.666667"

"122520"|"Citalopram Hydrobromide 40 MG Oral Tablet"|"76366"|"Chronic Major Depression"|"2"|"1"

"122520"|"Citalopram Hydrobromide 40 MG Oral Tablet"|"76536"|"Generalized Anxiety Disorder"|"3"|"0.25"

"122520"|"Citalopram Hydrobromide 40 MG Oral Tablet"|"76587"|"Anxiety Disorder NOS"|"2"|"0.222222"

"122520"|"Citalopram Hydrobromide 40 MG Oral Tablet"|"76680"|"Adjustment Disorder With Anxiety"|"2"|"1"

"122520"|"Citalopram Hydrobromide 40 MG Oral Tablet"|"275592"|"Post-traumatic Stress Disorder"|"2"|"0.25"

"122520"|"Citalopram Hydrobromide 40 MG Oral Tablet"|"275604"|"Depression With Anxiety"|"5"|"0.714286"

"122522"|"Nortitropin NordiFlex Pen 5 MG/1.5ML SOLN"|"69214"|"Hypopituitarism"|"2"|"0.666667"

"122534"|"Mirtazapine 7.5 MG Oral Tablet"|"76351"|"Depression"|"14"|"0.7"

"122534"|"Mirtazapine 7.5 MG Oral Tablet"|"76357"|"Major Depression, Recurrent"|"3"|"0.75"

"122534"|"Mirtazapine 7.5 MG Oral Tablet"|"275526"|"Severe Recurrent Major Depression Without Psychotic Features"|"2"|"1"

"122539"|"Glycopyrrolate 2 MG Oral Tablet"|"60886"|"Difficulty Swallowing (Dysphagia)"|"2"|"0.5"

"122541"|"Glycopyrrolate 1 MG Oral Tablet"|"32925"|"Chronic Respiratory Failure"|"2"|"0.4"

"122541"|"Glycopyrrolate 1 MG Oral Tablet"|"62633"|"Salivary Secretion Disturbance"|"2"|"0.333333"

"122541"|"Glycopyrrolate 1 MG Oral Tablet"|"62634"|"Salivary Secretion Disturbance: Ptyalism"|"2"|"0.333333"

"122541"|"Glycopyrrolate 1 MG Oral Tablet"|"75080"|"Parkinson's Disease"|"2"|"0.5"

"122541"|"Glycopyrrolate 1 MG Oral Tablet"|"189833"|"Tracheostomy Care Requirement"|"5"|"0.333333"

"122541"|"Glycopyrrolate 1 MG Oral Tablet"|"292064"|"Dysphagia"|"3"|"0.15"

"122543"|"Dulcolax Stool Softener 100 MG Oral Capsule"|"166777"|"Constipation"|"2"|"0.666667"

"122550"|"BD Insulin Syringe 30G X 1/2\0.5 ML Miscellaneous"|"69380"|"Diabetes Mellitus"|"3"|"0.75"

"122563"|"Citalopram Hydrobromide 10 MG Oral Tablet"|"61118"|"Anxiety (Symptom)"|"7"|"0.233333"

"122563"|"Citalopram Hydrobromide 10 MG Oral Tablet"|"75930"|"Mood Disorder Of Unknown (Axis III) Etiology"|"3"|"1"

"122563"|"Citalopram Hydrobromide 10 MG Oral Tablet"|"76272"|"Schizoaffective Disorder"|"3"|"1"

"122563"|"Citalopram Hydrobromide 10 MG Oral Tablet"|"76306"|"Episodic Mood Disorders"|"2"|"0.666667"

"122563"|"Citalopram Hydrobromide 10 MG Oral Tablet"|"76351"|"Depression"|"58"|"0.597938"

"122563"|"Citalopram Hydrobromide 10 MG Oral Tablet"|"76352"|"Major Depression, Single Episode"|"5"|"0.833333"

"122563"|"Citalopram Hydrobromide 10 MG Oral Tablet"|"76357"|"Major Depression, Recurrent"|"9"|"0.75"

"122563"|"Citalopram Hydrobromide 10 MG Oral Tablet"|"76361"|"Moderate Recurrent Major Depression"|"4"|"0.4"

"122563"|"Citalopram Hydrobromide 10 MG Oral Tablet"|"76388"|"Bipolar Disorder NOS"|"2"|"0.5"

"122563"|"Citalopram Hydrobromide 10 MG Oral Tablet"|"76536"|"Generalized Anxiety Disorder"|"4"|"0.285714"

"122563"|"Citalopram Hydrobromide 10 MG Oral Tablet"|"76537"|"Panic Disorder Without Agoraphobia"|"3"|"0.375"

"122563"|"Citalopram Hydrobromide 10 MG Oral Tablet"|"76538"|"Panic Disorder With Agoraphobia"|"2"|"0.4"

"122563"|"Citalopram Hydrobromide 10 MG Oral Tablet"|"76587"|"Anxiety Disorder NOS"|"7"|"0.466667"

"122563"|"Citalopram Hydrobromide 10 MG Oral Tablet"|"196089"|"Adjustment Disorder With Anxiety And Depressed Mood"|"4"|"0.8"

"122563"|"Citalopram Hydrobromide 10 MG Oral Tablet"|"251627"|"Adjustment Disorder With Depressed Mood"|"2"|"0.5"

"122563"|"Citalopram Hydrobromide 10 MG Oral Tablet"|"252575"|"Dementia With Lewy Bodies"|"3"|"0.6"

"122563"|"Citalopram Hydrobromide 10 MG Oral Tablet"|"275538"|"Moderate Single Episode Major Depression"|"2"|"1"

"122563"|"Citalopram Hydrobromide 10 MG Oral Tablet"|"275604"|"Depression With Anxiety"|"4"|"0.666667"

"122569"|"BD Insulin Syr Ultrafine II 31G X 5/16\0.5 ML Miscellaneous"|"69380"|"Diabetes Mellitus"|"2"|"0.4"

"122569"|"BD Insulin Syr Ultrafine II 31G X 5/16\0.5 ML Miscellaneous"|"69387"|"Type I Diabetes Mellitus"|"2"|"1"

"122578"|"Enablex 7.5 MG Oral Tablet Extended Release 24 Hour"|"65784"|"Hyperactivity Of The Bladder"|"2"|"0.666667"

"122578"|"Enablex 7.5 MG Oral Tablet Extended Release 24 Hour"|"296638"|"Urinary Incontinence"|"2"|"0.25"

"122579"|"ISOTretinoin 20 MG Oral Capsule"|"69606"|"Acne"|"3"|"1"

"122583"|"Quinapril HCl 5 MG Oral Tablet"|"63467"|"Hypertension"|"4"|"0.571429"  
"122594"|"Clarinet 0.5 MG/ML Oral Syrup"|"62598"|"Allergic Rhinitis"|"11"|"0.785714"  
"122597"|"Cymbalta 60 MG Oral Capsule Delayed Release Particles"|"61118"|"Anxiety (Symptom)"|"3"|"0.12"  
"122597"|"Cymbalta 60 MG Oral Capsule Delayed Release Particles"|"69424"|"Diabetic Peripheral Neuropathy"|"3"|"0.1875"  
"122597"|"Cymbalta 60 MG Oral Capsule Delayed Release Particles"|"75812"|"Myalgia And Myositis"|"6"|"0.428571"  
"122597"|"Cymbalta 60 MG Oral Capsule Delayed Release Particles"|"76351"|"Depression"|"55"|"0.419847"  
"122597"|"Cymbalta 60 MG Oral Capsule Delayed Release Particles"|"76357"|"Major Depression, Recurrent"|"14"|"0.608696"  
"122597"|"Cymbalta 60 MG Oral Capsule Delayed Release Particles"|"76361"|"Moderate Recurrent Major Depression"|"4"|"0.363636"  
"122597"|"Cymbalta 60 MG Oral Capsule Delayed Release Particles"|"76388"|"Bipolar Disorder NOS"|"3"|"0.428571"  
"122597"|"Cymbalta 60 MG Oral Capsule Delayed Release Particles"|"76536"|"Generalized Anxiety Disorder"|"3"|"0.2"  
"122597"|"Cymbalta 60 MG Oral Capsule Delayed Release Particles"|"76537"|"Panic Disorder Without Agoraphobia"|"2"|"0.285714"  
"122597"|"Cymbalta 60 MG Oral Capsule Delayed Release Particles"|"76587"|"Anxiety Disorder NOS"|"3"|"0.25"  
"122597"|"Cymbalta 60 MG Oral Capsule Delayed Release Particles"|"275520"|"Bipolar I Disorder, Most Recent Episode, Depressed - Severe Without Psychotic Features"|"2"|"1"  
"122597"|"Cymbalta 60 MG Oral Capsule Delayed Release Particles"|"275526"|"Severe Recurrent Major Depression Without Psychotic Features"|"2"|"0.666667"  
"122597"|"Cymbalta 60 MG Oral Capsule Delayed Release Particles"|"288933"|"Peripheral Neuropathy"|"6"|"0.272727"  
"122597"|"Cymbalta 60 MG Oral Capsule Delayed Release Particles"|"288977"|"Fibromyalgia"|"12"|"0.342857"  
"122600"|"Gabapentin 600 MG Oral Tablet"|"61070"|"Tingling (Paresthesia)"|"2"|"0.25"  
"122600"|"Gabapentin 600 MG Oral Tablet"|"69424"|"Diabetic Peripheral Neuropathy"|"3"|"0.25"  
"122600"|"Gabapentin 600 MG Oral Tablet"|"69426"|"Diabetic Peripheral Neuropathy Type II - Uncontrolled"|"2"|"1"  
"122600"|"Gabapentin 600 MG Oral Tablet"|"74990"|"Convulsive Grand Mal Seizure With Intractable Seizure"|"2"|"1"  
"122600"|"Gabapentin 600 MG Oral Tablet"|"91089"|"Lower Back Pain"|"5"|"0.357143"  
"122600"|"Gabapentin 600 MG Oral Tablet"|"173418"|"Radiculopathy"|"2"|"0.666667"  
"122600"|"Gabapentin 600 MG Oral Tablet"|"173419"|"Cervical Radiculopathy"|"2"|"0.5"  
"122600"|"Gabapentin 600 MG Oral Tablet"|"173447"|"Lumbar Radiculopathy At L5"|"2"|"1"  
"122600"|"Gabapentin 600 MG Oral Tablet"|"252566"|"Partial Complex Seizure"|"2"|"1"  
"122600"|"Gabapentin 600 MG Oral Tablet"|"288933"|"Peripheral Neuropathy"|"9"|"0.5"  
"122600"|"Gabapentin 600 MG Oral Tablet"|"288977"|"Fibromyalgia"|"2"|"0.285714"  
"122616"|"BD Insulin Syr Ultrafine II 31G X 5/16"|"1 ML Miscellaneous"|"69380"|"Diabetes Mellitus"|"4"|"0.571429"  
"122616"|"BD Insulin Syr Ultrafine II 31G X 5/16"|"1 ML Miscellaneous"|"69402"|"Diabetes Mellitus Poorly Controlled"|"2"|"1"  
"122617"|"Halobetasol Propionate 0.05 % External Ointment"|"70112"|"Atopic Dermatitis"|"2"|"1"  
"122617"|"Halobetasol Propionate 0.05 % External Ointment"|"70475"|"Scleroderma"|"2"|"1"  
"122622"|"Enablex 15 MG Oral Tablet Extended Release 24 Hour"|"296638"|"Urinary Incontinence"|"2"|"0.666667"  
"122623"|"Citalopram Hydrobromide 20 MG Oral Tablet"|"35314"|"Personality Change Due To Axis III Etiology"|"2"|"0.666667"  
"122623"|"Citalopram Hydrobromide 20 MG Oral Tablet"|"61118"|"Anxiety (Symptom)"|"16"|"0.372093"  
"122623"|"Citalopram Hydrobromide 20 MG Oral Tablet"|"75032"|"Vascular Dementia"|"2"|"0.4"  
"122623"|"Citalopram Hydrobromide 20 MG Oral Tablet"|"75834"|"Disruptive Behavior Disorder"|"2"|"1"  
"122623"|"Citalopram Hydrobromide 20 MG Oral Tablet"|"75929"|"Mood Disorder Due To General Medical Condition"|"3"|"0.75"  
"122623"|"Citalopram Hydrobromide 20 MG Oral Tablet"|"76213"|"Schizophrenia"|"3"|"0.333333"  
"122623"|"Citalopram Hydrobromide 20 MG Oral Tablet"|"76245"|"Undifferentiated Schizophrenia"|"2"|"1"  
"122623"|"Citalopram Hydrobromide 20 MG Oral Tablet"|"76272"|"Schizoaffective Disorder"|"4"|"0.8"  
"122623"|"Citalopram Hydrobromide 20 MG Oral Tablet"|"76306"|"Episodic Mood Disorders"|"2"|"0.5"  
"122623"|"Citalopram Hydrobromide 20 MG Oral Tablet"|"76351"|"Depression"|"90"|"0.608108"  
"122623"|"Citalopram Hydrobromide 20 MG Oral Tablet"|"76352"|"Major Depression, Single Episode"|"5"|"0.833333"

"122623"|"Citalopram Hydrobromide 20 MG Oral Tablet"|"76357"|"Major Depression, Recurrent"|"20"|"0.540541"  
"122623"|"Citalopram Hydrobromide 20 MG Oral Tablet"|"76361"|"Moderate Recurrent Major Depression"|"12"|"0.8"  
"122623"|"Citalopram Hydrobromide 20 MG Oral Tablet"|"76363"|"Major Depression, Recurrent With Psychotic  
Features"|"4"|"0.8"  
"122623"|"Citalopram Hydrobromide 20 MG Oral Tablet"|"76366"|"Chronic Major Depression"|"2"|"0.333333"  
"122623"|"Citalopram Hydrobromide 20 MG Oral Tablet"|"76388"|"Bipolar Disorder NOS"|"8"|"0.727273"  
"122623"|"Citalopram Hydrobromide 20 MG Oral Tablet"|"76536"|"Generalized Anxiety Disorder"|"13"|"0.40625"  
"122623"|"Citalopram Hydrobromide 20 MG Oral Tablet"|"76537"|"Panic Disorder Without  
Agoraphobia"|"5"|"0.454545"  
"122623"|"Citalopram Hydrobromide 20 MG Oral Tablet"|"76538"|"Panic Disorder With Agoraphobia"|"2"|"0.25"  
"122623"|"Citalopram Hydrobromide 20 MG Oral Tablet"|"76546"|"Obsessive Compulsive Disorder"|"2"|"0.222222"  
"122623"|"Citalopram Hydrobromide 20 MG Oral Tablet"|"76587"|"Anxiety Disorder NOS"|"13"|"0.52"  
"122623"|"Citalopram Hydrobromide 20 MG Oral Tablet"|"76680"|"Adjustment Disorder With Anxiety"|"3"|"0.6"  
"122623"|"Citalopram Hydrobromide 20 MG Oral Tablet"|"76842"|"Acquired Immunodeficiency Syndrome  
(AIDS)"|"2"|"0.333333"  
"122623"|"Citalopram Hydrobromide 20 MG Oral Tablet"|"163354"|"Demonstrated Behavior Psychomotor  
Agitation"|"2"|"1"  
"122623"|"Citalopram Hydrobromide 20 MG Oral Tablet"|"196089"|"Adjustment Disorder With Anxiety And  
Depressed Mood"|"8"|"0.8"  
"122623"|"Citalopram Hydrobromide 20 MG Oral Tablet"|"251600"|"Dementia"|"3"|"0.111111"  
"122623"|"Citalopram Hydrobromide 20 MG Oral Tablet"|"251627"|"Adjustment Disorder With Depressed  
Mood"|"3"|"0.6"  
"122623"|"Citalopram Hydrobromide 20 MG Oral Tablet"|"275526"|"Severe Recurrent Major Depression Without  
Psychotic Features"|"2"|"1"  
"122623"|"Citalopram Hydrobromide 20 MG Oral Tablet"|"275592"|"Post-traumatic Stress Disorder"|"3"|"0.272727"  
"122623"|"Citalopram Hydrobromide 20 MG Oral Tablet"|"275604"|"Depression With Anxiety"|"7"|"0.7"  
"122627"|"Quinapril HCl 10 MG Oral Tablet"|"63467"|"Hypertension"|"13"|"0.52"  
"122627"|"Quinapril HCl 10 MG Oral Tablet"|"63468"|"Essential Hypertension"|"2"|"0.285714"  
"122627"|"Quinapril HCl 10 MG Oral Tablet"|"63470"|"Benign Essential Hypertension"|"2"|"0.285714"  
"122629"|"Quinapril HCl 20 MG Oral Tablet"|"63467"|"Hypertension"|"11"|"0.458333"  
"122629"|"Quinapril HCl 20 MG Oral Tablet"|"63468"|"Essential Hypertension"|"6"|"0.461538"  
"122629"|"Quinapril HCl 20 MG Oral Tablet"|"63470"|"Benign Essential Hypertension"|"5"|"0.454545"  
"122654"|"Pilocarpine HCl 5 MG Oral Tablet"|"62635"|"Salivary Secretion Disturbance: Xerostomia"|"2"|"0.666667"  
"122654"|"Pilocarpine HCl 5 MG Oral Tablet"|"70455"|"Rheumatoid Arthritis"|"2"|"0.4"  
"122654"|"Pilocarpine HCl 5 MG Oral Tablet"|"70478"|"Sjogren's Syndrome"|"13"|"0.619048"  
"122654"|"Pilocarpine HCl 5 MG Oral Tablet"|"70479"|"Sicca Syndrome"|"8"|"0.888889"  
"122679"|"Pentasa 500 MG Oral Capsule Extended Release"|"64980"|"Crohn's Disease"|"6"|"0.6"  
"122690"|"GuaiFENesin 400 MG Oral Tablet"|"60869"|"Cough"|"3"|"0.272727"  
"122690"|"GuaiFENesin 400 MG Oral Tablet"|"62578"|"Acute Sinusitis"|"3"|"0.3"  
"122690"|"GuaiFENesin 400 MG Oral Tablet"|"64118"|"Acute Bronchitis"|"3"|"0.25"  
"122690"|"GuaiFENesin 400 MG Oral Tablet"|"77891"|"Acute Upper Respiratory Infection"|"14"|"0.411765"  
"122690"|"GuaiFENesin 400 MG Oral Tablet"|"258835"|"Bronchitis"|"2"|"0.666667"  
"122702"|"Itraconazole 100 MG Oral Capsule"|"70119"|"Onychomycosis"|"9"|"0.9"  
"122702"|"Itraconazole 100 MG Oral Capsule"|"70126"|"Tinea Versicolor"|"2"|"1"  
"122702"|"Itraconazole 100 MG Oral Capsule"|"278562"|"Onychomycosis Of The Toenails"|"6"|"0.75"  
"122707"|"Fluconazole 150 MG Oral Tablet"|"60973"|"Vaginal Discharge (Symptom)"|"2"|"0.25"  
"122707"|"Fluconazole 150 MG Oral Tablet"|"62578"|"Acute Sinusitis"|"9"|"0.163636"  
"122707"|"Fluconazole 150 MG Oral Tablet"|"62580"|"Acute Maxillary Sinusitis"|"3"|"0.333333"  
"122707"|"Fluconazole 150 MG Oral Tablet"|"62586"|"Chronic Maxillary Sinusitis"|"2"|"0.25"  
"122707"|"Fluconazole 150 MG Oral Tablet"|"62588"|"Chronic Ethmoidal Sinusitis"|"2"|"0.285714"  
"122707"|"Fluconazole 150 MG Oral Tablet"|"65762"|"Urinary Tract Infection"|"12"|"0.104348"  
"122707"|"Fluconazole 150 MG Oral Tablet"|"66213"|"Vaginitis"|"48"|"0.444444"  
"122707"|"Fluconazole 150 MG Oral Tablet"|"66214"|"Candida Albicans Vaginitis"|"79"|"0.782178"  
"122707"|"Fluconazole 150 MG Oral Tablet"|"66216"|"Nonspecific Vaginitis"|"4"|"0.444444"

"122707"|"Fluconazole 150 MG Oral Tablet"|"66249"|"Vulvovaginitis"|"4"|"0.666667"  
"122707"|"Fluconazole 150 MG Oral Tablet"|"66250"|"Candida Albicans Vulvovaginitis"|"31"|"0.645833"  
"122707"|"Fluconazole 150 MG Oral Tablet"|"70119"|"Onychomycosis"|"2"|"0.333333"  
"122707"|"Fluconazole 150 MG Oral Tablet"|"70121"|"Tinea Cruris"|"4"|"0.444444"  
"122707"|"Fluconazole 150 MG Oral Tablet"|"70124"|"Tinea Corporis"|"7"|"0.411765"  
"122707"|"Fluconazole 150 MG Oral Tablet"|"77205"|"Candidiasis"|"5"|"0.625"  
"122707"|"Fluconazole 150 MG Oral Tablet"|"77206"|"Oral Thrush"|"4"|"0.571429"  
"122707"|"Fluconazole 150 MG Oral Tablet"|"77211"|"Vaginal Candidiasis"|"154"|"0.814815"  
"122707"|"Fluconazole 150 MG Oral Tablet"|"77216"|"Genitourinary Candidiasis"|"2"|"0.666667"  
"122707"|"Fluconazole 150 MG Oral Tablet"|"88021"|"Vaginal Itching Or Burning"|"2"|"0.5"  
"122707"|"Fluconazole 150 MG Oral Tablet"|"173522"|"Candidal Intertrigo"|"3"|"0.333333"  
"122707"|"Fluconazole 150 MG Oral Tablet"|"251528"|"Acute Otitis Media"|"2"|"0.222222"  
"122707"|"Fluconazole 150 MG Oral Tablet"|"274534"|"Acute Sore Throat"|"2"|"0.222222"  
"122707"|"Fluconazole 150 MG Oral Tablet"|"283255"|"Balanitis"|"5"|"1"  
"122707"|"Fluconazole 150 MG Oral Tablet"|"288761"|"Vaginal Discharge"|"36"|"0.473684"  
"122712"|"Lactulose Solution"|"65286"|"Cirrhosis"|"2"|"1"  
"122712"|"Lactulose Solution"|"166777"|"Constipation"|"2"|"0.4"  
"122728"|"Tramadol-Acetaminophen 37.5-325 MG Oral Tablet"|"70219"|"Osteoarthritis Of The Knee"|"3"|"0.5"  
"122728"|"Tramadol-Acetaminophen 37.5-325 MG Oral Tablet"|"70382"|"Arthropathy Of Multiple Sites"|"2"|"1"  
"122728"|"Tramadol-Acetaminophen 37.5-325 MG Oral Tablet"|"70455"|"Rheumatoid Arthritis"|"3"|"0.5"  
"122728"|"Tramadol-Acetaminophen 37.5-325 MG Oral Tablet"|"73464"|"Lower Back Sprain"|"2"|"0.4"  
"122728"|"Tramadol-Acetaminophen 37.5-325 MG Oral Tablet"|"73666"|"Backache"|"2"|"0.285714"  
"122728"|"Tramadol-Acetaminophen 37.5-325 MG Oral Tablet"|"73671"|"Lumbar Disc Degeneration"|"2"|"0.666667"  
"122728"|"Tramadol-Acetaminophen 37.5-325 MG Oral Tablet"|"74538"|"Common Migraine (Without Aura) With Intractable Migraine"|"2"|"0.666667"  
"122728"|"Tramadol-Acetaminophen 37.5-325 MG Oral Tablet"|"75601"|"Polyneuropathy"|"2"|"1"  
"122728"|"Tramadol-Acetaminophen 37.5-325 MG Oral Tablet"|"85614"|"Joint Pain, Localized In The Hip"|"2"|"0.333333"  
"122728"|"Tramadol-Acetaminophen 37.5-325 MG Oral Tablet"|"85623"|"Joint Pain, Localized In The Knee"|"4"|"0.266667"  
"122728"|"Tramadol-Acetaminophen 37.5-325 MG Oral Tablet"|"90945"|"Joint Pain, Localized In The Right Shoulder"|"2"|"0.666667"  
"122728"|"Tramadol-Acetaminophen 37.5-325 MG Oral Tablet"|"91089"|"Lower Back Pain"|"6"|"0.352941"  
"122728"|"Tramadol-Acetaminophen 37.5-325 MG Oral Tablet"|"257996"|"Arthritis"|"2"|"0.2"  
"122752"|"Clarinet-D 24 Hour 5-240 MG Oral Tablet Extended Release 24 Hour"|"62598"|"Allergic Rhinitis"|"3"|"0.75"  
"122763"|"Cymbalta 20 MG Oral Capsule Delayed Release Particles"|"69424"|"Diabetic Peripheral Neuropathy"|"2"|"0.5"  
"122763"|"Cymbalta 20 MG Oral Capsule Delayed Release Particles"|"75812"|"Myalgia And Myositis"|"2"|"0.5"  
"122763"|"Cymbalta 20 MG Oral Capsule Delayed Release Particles"|"76307"|"Bipolar Disorder"|"2"|"0.5"  
"122763"|"Cymbalta 20 MG Oral Capsule Delayed Release Particles"|"76351"|"Depression"|"12"|"0.324324"  
"122763"|"Cymbalta 20 MG Oral Capsule Delayed Release Particles"|"76357"|"Major Depression, Recurrent"|"6"|"0.545455"  
"122763"|"Cymbalta 20 MG Oral Capsule Delayed Release Particles"|"76358"|"Major Depression, Recurrent Without Melancholia"|"2"|"1"  
"122763"|"Cymbalta 20 MG Oral Capsule Delayed Release Particles"|"76388"|"Bipolar Disorder NOS"|"2"|"0.4"  
"122763"|"Cymbalta 20 MG Oral Capsule Delayed Release Particles"|"76536"|"Generalized Anxiety Disorder"|"2"|"1"  
"122763"|"Cymbalta 20 MG Oral Capsule Delayed Release Particles"|"275604"|"Depression With Anxiety"|"2"|"0.666667"  
"122763"|"Cymbalta 20 MG Oral Capsule Delayed Release Particles"|"288921"|"Chronic Pain"|"2"|"0.222222"  
"122763"|"Cymbalta 20 MG Oral Capsule Delayed Release Particles"|"288933"|"Peripheral Neuropathy"|"3"|"0.375"  
"122763"|"Cymbalta 20 MG Oral Capsule Delayed Release Particles"|"288977"|"Fibromyalgia"|"2"|"0.4"  
"122789"|"Ethosuximide 250 MG/5ML Oral Solution"|"297231"|"Epilepsy"|"2"|"1"  
"122807"|"Lunesta 2 MG Oral Tablet"|"61108"|"Insomnia"|"36"|"0.734694"

"122807"|"Lunesta 2 MG Oral Tablet"|"61118"|"Anxiety (Symptom)"|"2"|"0.25"  
"122807"|"Lunesta 2 MG Oral Tablet"|"173463"|"Insomnia Due To Stress"|"2"|"1"  
"122809"|"GlyBURIDE-MetFORMIN 2.5-500 MG Oral Tablet"|"69380"|"Diabetes Mellitus"|"14"|"0.28"  
"122809"|"GlyBURIDE-MetFORMIN 2.5-500 MG Oral Tablet"|"69381"|"Type II Diabetes Mellitus"|"15"|"0.454545"  
"122809"|"GlyBURIDE-MetFORMIN 2.5-500 MG Oral Tablet"|"69382"|"Type II Diabetes Mellitus - Uncomplicated, Uncontrolled"|"8"|"0.888889"  
"122809"|"GlyBURIDE-MetFORMIN 2.5-500 MG Oral Tablet"|"69402"|"Diabetes Mellitus Poorly Controlled"|"10"|"0.47619"  
"122809"|"GlyBURIDE-MetFORMIN 2.5-500 MG Oral Tablet"|"258942"|"Type II Diabetes Mellitus - Uncomplicated, Controlled"|"2"|"0.4"  
"122810"|"Nystatin 100000 UNIT/GM External Powder"|"66250"|"Candida Albicans Vulvovaginitis"|"5"|"1"  
"122810"|"Nystatin 100000 UNIT/GM External Powder"|"70121"|"Tinea Cruris"|"10"|"0.833333"  
"122810"|"Nystatin 100000 UNIT/GM External Powder"|"70124"|"Tinea Corporis"|"4"|"0.571429"  
"122810"|"Nystatin 100000 UNIT/GM External Powder"|"77210"|"Cutaneous Candidiasis"|"14"|"0.777778"  
"122810"|"Nystatin 100000 UNIT/GM External Powder"|"77211"|"Vaginal Candidiasis"|"4"|"0.444444"  
"122810"|"Nystatin 100000 UNIT/GM External Powder"|"83888"|"Tracheostomy"|"3"|"0.3"  
"122810"|"Nystatin 100000 UNIT/GM External Powder"|"93705"|"Dermatitis"|"2"|"0.333333"  
"122810"|"Nystatin 100000 UNIT/GM External Powder"|"168632"|"Tinea Cruris Of The Groin"|"2"|"0.4"  
"122810"|"Nystatin 100000 UNIT/GM External Powder"|"173522"|"Candidal Intertrigo"|"5"|"1"  
"122810"|"Nystatin 100000 UNIT/GM External Powder"|"189833"|"Tracheostomy Care Requirement"|"3"|"0.428571"  
"122814"|"RisperDAL Consta 25 MG Intramuscular Suspension Reconstituted"|"76232"|"Paranoid Schizophrenia"|"3"|"1"  
"122814"|"RisperDAL Consta 25 MG Intramuscular Suspension Reconstituted"|"76272"|"Schizo affective Disorder"|"2"|"1"  
"122814"|"RisperDAL Consta 25 MG Intramuscular Suspension Reconstituted"|"76281"|"Chronic Schizophrenia"|"2"|"1"  
"122860"|"Sildenafil Citrate Powder"|"63484"|"Pulmonary Hypertension"|"11"|"0.647059"  
"122860"|"Sildenafil Citrate Powder"|"63485"|"Primary Pulmonary Hypertension"|"2"|"1"  
"122861"|"Polyethylene Glycol 3350 Oral Powder"|"60899"|"Abdominal Pain"|"28"|"0.325581"  
"122861"|"Polyethylene Glycol 3350 Oral Powder"|"65032"|"Neurogenic Bowel"|"4"|"0.571429"  
"122861"|"Polyethylene Glycol 3350 Oral Powder"|"65055"|"Chronic Constipation"|"65"|"0.65"  
"122861"|"Polyethylene Glycol 3350 Oral Powder"|"65076"|"Irritable Bowel Syndrome"|"4"|"0.285714"  
"122861"|"Polyethylene Glycol 3350 Oral Powder"|"75881"|"Encopresis"|"6"|"0.230769"  
"122861"|"Polyethylene Glycol 3350 Oral Powder"|"87743"|"Diffuse Abdominal Pain"|"7"|"0.304348"  
"122861"|"Polyethylene Glycol 3350 Oral Powder"|"87744"|"Abdominal Pain In Multiple Locations"|"2"|"0.5"  
"122861"|"Polyethylene Glycol 3350 Oral Powder"|"87834"|"Red Blood In Bowel Movement (Hematochezia)"|"3"|"0.230769"  
"122861"|"Polyethylene Glycol 3350 Oral Powder"|"165460"|"Quadriplegia"|"3"|"0.75"  
"122861"|"Polyethylene Glycol 3350 Oral Powder"|"166777"|"Constipation"|"279"|"0.766484"  
"122861"|"Polyethylene Glycol 3350 Oral Powder"|"166778"|"Slow Transit Constipation"|"6"|"1"  
"122861"|"Polyethylene Glycol 3350 Oral Powder"|"251599"|"Encopresis With Constipation, Overflow Incontinence"|"7"|"0.4375"  
"122861"|"Polyethylene Glycol 3350 Oral Powder"|"257833"|"Functional Constipation"|"6"|"0.857143"  
"122864"|"PrednisoLONE Sodium Phosphate 15 MG/5ML Oral Solution"|"60874"|"Wheezing"|"2"|"0.222222"  
"122864"|"PrednisoLONE Sodium Phosphate 15 MG/5ML Oral Solution"|"64180"|"Reactive Airway Disease"|"3"|"0.333333"  
"122864"|"PrednisoLONE Sodium Phosphate 15 MG/5ML Oral Solution"|"64181"|"Asthma"|"9"|"0.45"  
"122864"|"PrednisoLONE Sodium Phosphate 15 MG/5ML Oral Solution"|"166748"|"Asthma With Acute Exacerbation"|"4"|"0.8"  
"122870"|"Minocycline HCl 100 MG Oral Tablet"|"70080"|"Skin Abscess"|"2"|"1"  
"122880"|"Atrovent HFA 17 MCG/ACT Inhalation Aerosol Solution"|"64181"|"Asthma"|"11"|"0.5"  
"122880"|"Atrovent HFA 17 MCG/ACT Inhalation Aerosol Solution"|"64205"|"Chronic Obstructive Pulmonary Disease"|"9"|"0.45"  
"122880"|"Atrovent HFA 17 MCG/ACT Inhalation Aerosol Solution"|"77891"|"Acute Upper Respiratory

Infection|"2|"0.2"  
"122880|"Atrovent HFA 17 MCG/ACT Inhalation Aerosol Solution|"247012|"Shortness Of Breath|"2|"0.666667"  
"122903|"Fortamet 1000 MG Oral Tablet Extended Release 24 Hour|"69380|"Diabetes Mellitus|"3|"0.375"  
"122903|"Fortamet 1000 MG Oral Tablet Extended Release 24 Hour|"69402|"Diabetes Mellitus Poorly  
Controlled|"3|"1"  
"122908|"Mucinex DM 30-600 MG Oral Tablet Extended Release 12 Hour|"64118|"Acute  
Bronchitis|"2|"0.666667"  
"122908|"Mucinex DM 30-600 MG Oral Tablet Extended Release 12 Hour|"77890|"Upper Respiratory  
Infection|"2|"0.5"  
"122913|"Fluconazole 10 MG/ML Oral Suspension Reconstituted|"77206|"Oral Thrush|"4|"0.571429"  
"122929|"Ofloxacin 0.3 % Ophthalmic Solution|"61417|"Conjunctivitis|"4|"1"  
"122929|"Ofloxacin 0.3 % Ophthalmic Solution|"61418|"Acute Conjunctivitis|"6|"0.666667"  
"122930|"Clotrimazole-Betamethasone 1-0.05 % External Lotion|"69710|"Contact Dermatitis|"2|"1"  
"122930|"Clotrimazole-Betamethasone 1-0.05 % External Lotion|"93705|"Dermatitis|"2|"1"  
"122936|"Ciprofloxacin HCl 0.3 % Ophthalmic Solution|"61417|"Conjunctivitis|"9|"1"  
"122936|"Ciprofloxacin HCl 0.3 % Ophthalmic Solution|"61418|"Acute Conjunctivitis|"16|"0.888889"  
"122936|"Ciprofloxacin HCl 0.3 % Ophthalmic Solution|"166478|"Acute Bacterial Conjunctivitis|"2|"0.666667"  
"122952|"Tylenol Cold 30-2-15-325 MG Oral Tablet|"60869|"Cough|"3|"0.75"  
"122953|"Gabapentin 100 MG Oral Capsule|"31947|"Lumbago|"3|"0.375"  
"122953|"Gabapentin 100 MG Oral Capsule|"61070|"Tingling (Paresthesia)"|"2|"0.25"  
"122953|"Gabapentin 100 MG Oral Capsule|"61072|"Numbness (Hypesthesia)"|"5|"0.416667"  
"122953|"Gabapentin 100 MG Oral Capsule|"69380|"Diabetes Mellitus|"11|"0.0647059"  
"122953|"Gabapentin 100 MG Oral Capsule|"69402|"Diabetes Mellitus Poorly Controlled|"3|"0.107143"  
"122953|"Gabapentin 100 MG Oral Capsule|"69424|"Diabetic Peripheral Neuropathy|"10|"0.454545"  
"122953|"Gabapentin 100 MG Oral Capsule|"69434|"Diabetic Autonomic Neuropathy|"2|"0.5"  
"122953|"Gabapentin 100 MG Oral Capsule|"74997|"Partial Simple Seizure|"2|"1"  
"122953|"Gabapentin 100 MG Oral Capsule|"75080|"Parkinson's Disease|"2|"0.2"  
"122953|"Gabapentin 100 MG Oral Capsule|"75104|"Familial (Benign Essential) Tremor|"4|"0.5"  
"122953|"Gabapentin 100 MG Oral Capsule|"75124|"Demyelinating Disorders|"3|"0.6"  
"122953|"Gabapentin 100 MG Oral Capsule|"75125|"Multiple Sclerosis|"5|"0.208333"  
"122953|"Gabapentin 100 MG Oral Capsule|"75432|"Cerebellar Ataxia|"2|"1"  
"122953|"Gabapentin 100 MG Oral Capsule|"75486|"Trigeminal Neuralgia|"5|"0.555556"  
"122953|"Gabapentin 100 MG Oral Capsule|"75487|"Atypical Face Pain|"3|"0.428571"  
"122953|"Gabapentin 100 MG Oral Capsule|"75587|"Lumbar Canal Stenosis|"2|"0.222222"  
"122953|"Gabapentin 100 MG Oral Capsule|"75601|"Polyneuropathy|"6|"0.857143"  
"122953|"Gabapentin 100 MG Oral Capsule|"75674|"Idiopathic Peripheral Neuropathy|"4|"0.571429"  
"122953|"Gabapentin 100 MG Oral Capsule|"75717|"Cervicalgia|"5|"0.25"  
"122953|"Gabapentin 100 MG Oral Capsule|"75728|"Sciatica|"5|"0.3125"  
"122953|"Gabapentin 100 MG Oral Capsule|"76610|"Chronic Pain Syndrome|"6|"0.5"  
"122953|"Gabapentin 100 MG Oral Capsule|"76794|"Herpes Zoster (Shingles)"|"5|"0.454545"  
"122953|"Gabapentin 100 MG Oral Capsule|"85633|"Pain In The Leg (Below The Knee)"|"3|"0.428571"  
"122953|"Gabapentin 100 MG Oral Capsule|"85707|"Back Pain|"2|"0.5"  
"122953|"Gabapentin 100 MG Oral Capsule|"91089|"Lower Back Pain|"5|"0.135135"  
"122953|"Gabapentin 100 MG Oral Capsule|"173425|"Cervical Radiculopathy At C6 Nerve Root|"4|"1"  
"122953|"Gabapentin 100 MG Oral Capsule|"173426|"Cervical Radiculopathy At C7 Nerve Root|"2|"1"  
"122953|"Gabapentin 100 MG Oral Capsule|"173442|"Lumbar Radiculopathy|"3|"0.214286"  
"122953|"Gabapentin 100 MG Oral Capsule|"251467|"Limb Pain|"4|"0.210526"  
"122953|"Gabapentin 100 MG Oral Capsule|"252625|"Diabetic Polyneuropathy|"2|"0.666667"  
"122953|"Gabapentin 100 MG Oral Capsule|"288921|"Chronic Pain|"3|"0.166667"  
"122953|"Gabapentin 100 MG Oral Capsule|"288933|"Peripheral Neuropathy|"14|"0.358974"  
"122956|"Vytorin 10-40 MG Oral Tablet|"62975|"Coronary Artery Disease|"5|"0.121951"  
"122956|"Vytorin 10-40 MG Oral Tablet|"67970|"Hyperlipidemia|"36|"0.4"  
"122956|"Vytorin 10-40 MG Oral Tablet|"283291|"Hypercholesterolemia|"5|"0.625"  
"122956|"Vytorin 10-40 MG Oral Tablet|"291485|"Dyslipidemia|"6|"0.5"

"122970"|"Mometasone Furoate 0.1 % External Cream"|"69710"|"Contact Dermatitis"|"3"|"0.6"  
"122970"|"Mometasone Furoate 0.1 % External Cream"|"70112"|"Atopic Dermatitis"|"2"|"0.5"  
"122970"|"Mometasone Furoate 0.1 % External Cream"|"70475"|"Scleroderma"|"2"|"1"  
"122970"|"Mometasone Furoate 0.1 % External Cream"|"278350"|"Eczema"|"3"|"0.5"  
"122978"|"RisperDAL Consta 50 MG Intramuscular Suspension Reconstituted"|"76245"|"Undifferentiated Schizophrenia"|"2"|"1"  
"122979"|"Lunesta 1 MG Oral Tablet"|"61108"|"Insomnia"|"11"|"0.846154"  
"122986"|"FentaNYL 25 MCG/HR Transdermal Patch 72 Hour"|"85614"|"Joint Pain, Localized In The Hip"|"2"|"0.666667"  
"122986"|"FentaNYL 25 MCG/HR Transdermal Patch 72 Hour"|"91089"|"Lower Back Pain"|"4"|"0.571429"  
"122986"|"FentaNYL 25 MCG/HR Transdermal Patch 72 Hour"|"173442"|"Lumbar Radiculopathy"|"2"|"0.666667"  
"122986"|"FentaNYL 25 MCG/HR Transdermal Patch 72 Hour"|"278812"|"Prostate Cancer"|"2"|"0.666667"  
"122986"|"FentaNYL 25 MCG/HR Transdermal Patch 72 Hour"|"288921"|"Chronic Pain"|"3"|"0.428571"  
"123017"|"AnaMantle HC 3-0.5 % KIT"|"65128"|"Hemorrhoids"|"2"|"1"  
"123024"|"MedroxyPROGESTERone Acetate 150 MG/ML Intramuscular Suspension"|"187792"|"Gynecologic Services Contraceptive Management"|"18"|"0.782609"  
"123024"|"MedroxyPROGESTERone Acetate 150 MG/ML Intramuscular Suspension"|"202874"|"Inquiry And Counseling: Contraceptive Practices"|"4"|"1"  
"123024"|"MedroxyPROGESTERone Acetate 150 MG/ML Intramuscular Suspension"|"250996"|"Contraceptives"|"2"|"0.4"  
"123024"|"MedroxyPROGESTERone Acetate 150 MG/ML Intramuscular Suspension"|"279038"|"Inquiry And Counseling: Family Planning"|"2"|"1"  
"123024"|"MedroxyPROGESTERone Acetate 150 MG/ML Intramuscular Suspension"|"288609"|"Menometrorrhagia"|"2"|"1"  
"123028"|"Flovent HFA 220 MCG/ACT Inhalation Aerosol"|"60869"|"Cough"|"6"|"0.461538"  
"123028"|"Flovent HFA 220 MCG/ACT Inhalation Aerosol"|"64118"|"Acute Bronchitis"|"2"|"0.333333"  
"123028"|"Flovent HFA 220 MCG/ACT Inhalation Aerosol"|"64181"|"Asthma"|"35"|"0.454545"  
"123028"|"Flovent HFA 220 MCG/ACT Inhalation Aerosol"|"64205"|"Chronic Obstructive Pulmonary Disease"|"3"|"0.5"  
"123028"|"Flovent HFA 220 MCG/ACT Inhalation Aerosol"|"64210"|"Diffuse Obstructive Chronic Bronchitis"|"4"|"0.8"  
"123028"|"Flovent HFA 220 MCG/ACT Inhalation Aerosol"|"64223"|"Bronchiectasis"|"2"|"0.4"  
"123028"|"Flovent HFA 220 MCG/ACT Inhalation Aerosol"|"64231"|"Tracheal Stenosis"|"5"|"0.833333"  
"123028"|"Flovent HFA 220 MCG/ACT Inhalation Aerosol"|"78152"|"Immunodeficiency Disorders"|"2"|"0.333333"  
"123028"|"Flovent HFA 220 MCG/ACT Inhalation Aerosol"|"277994"|"Emphysematous Chronic Bronchitis"|"4"|"1"  
"123028"|"Flovent HFA 220 MCG/ACT Inhalation Aerosol"|"289126"|"Eosinophilic Esophagitis"|"7"|"1"  
"123036"|"Clarithromycin 500 MG Oral Tablet"|"60899"|"Abdominal Pain"|"2"|"0.25"  
"123036"|"Clarithromycin 500 MG Oral Tablet"|"62353"|"Acute Serous Otitis Media Of The Left Ear"|"2"|"1"  
"123036"|"Clarithromycin 500 MG Oral Tablet"|"62578"|"Acute Sinusitis"|"31"|"0.815789"  
"123036"|"Clarithromycin 500 MG Oral Tablet"|"62580"|"Acute Maxillary Sinusitis"|"3"|"0.428571"  
"123036"|"Clarithromycin 500 MG Oral Tablet"|"62586"|"Chronic Maxillary Sinusitis"|"4"|"0.173913"  
"123036"|"Clarithromycin 500 MG Oral Tablet"|"62587"|"Chronic Frontal Sinusitis"|"3"|"0.176471"  
"123036"|"Clarithromycin 500 MG Oral Tablet"|"62588"|"Chronic Ethmoidal Sinusitis"|"8"|"0.4"  
"123036"|"Clarithromycin 500 MG Oral Tablet"|"62760"|"Acute Pharyngitis"|"6"|"0.428571"  
"123036"|"Clarithromycin 500 MG Oral Tablet"|"64118"|"Acute Bronchitis"|"23"|"0.69697"  
"123036"|"Clarithromycin 500 MG Oral Tablet"|"64159"|"Atypical Mycobacterium Avium Intracellulare Pneumonia"|"2"|"1"  
"123036"|"Clarithromycin 500 MG Oral Tablet"|"64764"|"Gastritis Due To H. Pylori"|"5"|"0.625"  
"123036"|"Clarithromycin 500 MG Oral Tablet"|"64787"|"Chronic Antral H. Pylori Associated Gastritis"|"2"|"1"  
"123036"|"Clarithromycin 500 MG Oral Tablet"|"69999"|"Cellulitis"|"2"|"0.666667"  
"123036"|"Clarithromycin 500 MG Oral Tablet"|"76976"|"Helicobacter Pylori (H. Pylori) Infection"|"6"|"0.857143"  
"123036"|"Clarithromycin 500 MG Oral Tablet"|"77650"|"Atypical Mycobacterial Infection"|"4"|"0.571429"  
"123036"|"Clarithromycin 500 MG Oral Tablet"|"87587"|"Coughing Up Sputum Yellow"|"7"|"0.875"  
"123036"|"Clarithromycin 500 MG Oral Tablet"|"166549"|"Acute Streptococcal Tonsillitis"|"2"|"0.666667"

"123036"|"Clarithromycin 500 MG Oral Tablet"|"166748"|"Asthma With Acute Exacerbation"|"2"|"0.666667"  
"123036"|"Clarithromycin 500 MG Oral Tablet"|"258835"|"Bronchitis"|"2"|"0.666667"  
"123036"|"Clarithromycin 500 MG Oral Tablet"|"277876"|"Lobar Pneumonia"|"7"|"1"  
"123049"|"Felodipine 5 MG Oral Tablet Extended Release 24 Hour"|"63468"|"Essential Hypertension"|"3"|"0.5"  
"123049"|"Felodipine 5 MG Oral Tablet Extended Release 24 Hour"|"63470"|"Benign Essential  
Hypertension"|"3"|"0.75"  
"123053"|"Flovent HFA 44 MCG/ACT Inhalation Aerosol"|"60869"|"Cough"|"14"|"0.378378"  
"123053"|"Flovent HFA 44 MCG/ACT Inhalation Aerosol"|"60874"|"Wheezing"|"8"|"0.156863"  
"123053"|"Flovent HFA 44 MCG/ACT Inhalation Aerosol"|"62598"|"Allergic Rhinitis"|"12"|"0.0625"  
"123053"|"Flovent HFA 44 MCG/ACT Inhalation Aerosol"|"64180"|"Reactive Airway Disease"|"18"|"0.243243"  
"123053"|"Flovent HFA 44 MCG/ACT Inhalation Aerosol"|"64181"|"Asthma"|"138"|"0.50365"  
"123053"|"Flovent HFA 44 MCG/ACT Inhalation Aerosol"|"64182"|"Mild Intermittent Asthma"|"5"|"0.227273"  
"123053"|"Flovent HFA 44 MCG/ACT Inhalation Aerosol"|"64183"|"Mild Persistent Asthma"|"5"|"0.294118"  
"123053"|"Flovent HFA 44 MCG/ACT Inhalation Aerosol"|"64184"|"Moderate Persistent Asthma"|"6"|"0.461538"  
"123053"|"Flovent HFA 44 MCG/ACT Inhalation Aerosol"|"64186"|"Extrinsic Asthma"|"4"|"1"  
"123053"|"Flovent HFA 44 MCG/ACT Inhalation Aerosol"|"64190"|"Exercise-induced Asthma"|"2"|"0.285714"  
"123053"|"Flovent HFA 44 MCG/ACT Inhalation Aerosol"|"67885"|"Bronchopulmonary Dysplasia Of Fetus Or  
Newborn"|"3"|"0.15"  
"123053"|"Flovent HFA 44 MCG/ACT Inhalation Aerosol"|"166748"|"Asthma With Acute  
Exacerbation"|"4"|"0.133333"  
"123053"|"Flovent HFA 44 MCG/ACT Inhalation Aerosol"|"257912"|"Disorder Of Mitochondrial  
Metabolism"|"4"|"0.4"  
"123053"|"Flovent HFA 44 MCG/ACT Inhalation Aerosol"|"258832"|"Cough Variant Asthma"|"10"|"0.588235"  
"123053"|"Flovent HFA 44 MCG/ACT Inhalation Aerosol"|"289126"|"Eosinophilic Esophagitis"|"4"|"0.8"  
"123053"|"Flovent HFA 44 MCG/ACT Inhalation Aerosol"|"297031"|"Intermittent Asthma"|"3"|"0.75"  
"123076"|"Griseofulvin Microsize 125 MG/5ML Oral Suspension"|"70116"|"Tinea Capitis"|"74"|"0.747475"  
"123076"|"Griseofulvin Microsize 125 MG/5ML Oral Suspension"|"70119"|"Onychomycosis"|"2"|"1"  
"123076"|"Griseofulvin Microsize 125 MG/5ML Oral Suspension"|"70124"|"Tinea Corporis"|"7"|"0.241379"  
"123118"|"Lisinopril Powder"|"34588"|"Proteinuria"|"3"|"0.75"  
"123120"|"Lunesta 3 MG Oral Tablet"|"61108"|"Insomnia"|"28"|"0.736842"  
"123120"|"Lunesta 3 MG Oral Tablet"|"75125"|"Multiple Sclerosis"|"2"|"0.2"  
"123120"|"Lunesta 3 MG Oral Tablet"|"76232"|"Paranoid Schizophrenia"|"2"|"1"  
"123120"|"Lunesta 3 MG Oral Tablet"|"76395"|"Primary Insomnia"|"2"|"0.666667"  
"123126"|"Cilostazol 100 MG Oral Tablet"|"63738"|"Peripheral Vascular Disease"|"9"|"0.529412"  
"123126"|"Cilostazol 100 MG Oral Tablet"|"70475"|"Scleroderma"|"3"|"0.6"  
"123137"|"Allegra-D 12 Hour 60-120 MG TB12"|"62350"|"Acute Serous Otitis Media"|"3"|"0.6"  
"123137"|"Allegra-D 12 Hour 60-120 MG TB12"|"62577"|"Sinusitis"|"2"|"0.333333"  
"123137"|"Allegra-D 12 Hour 60-120 MG TB12"|"62578"|"Acute Sinusitis"|"13"|"0.5"  
"123137"|"Allegra-D 12 Hour 60-120 MG TB12"|"62580"|"Acute Maxillary Sinusitis"|"2"|"0.4"  
"123137"|"Allegra-D 12 Hour 60-120 MG TB12"|"62598"|"Allergic Rhinitis"|"35"|"0.416667"  
"123137"|"Allegra-D 12 Hour 60-120 MG TB12"|"77891"|"Acute Upper Respiratory Infection"|"12"|"0.375"  
"123137"|"Allegra-D 12 Hour 60-120 MG TB12"|"87028"|"Nasal Passage Blockage (Stuffiness)"|"3"|"0.75"  
"123137"|"Allegra-D 12 Hour 60-120 MG TB12"|"251528"|"Acute Otitis Media"|"2"|"0.333333"  
"123177"|"Clarithromycin 250 MG Oral Tablet"|"62588"|"Chronic Ethmoidal Sinusitis"|"4"|"0.8"  
"123177"|"Clarithromycin 250 MG Oral Tablet"|"62611"|"Chronic Rhinitis"|"2"|"1"  
"123177"|"Clarithromycin 250 MG Oral Tablet"|"64764"|"Gastritis Due To H. Pylori"|"2"|"1"  
"123189"|"Triglide 160 MG Oral Tablet"|"67970"|"Hyperlipidemia"|"3"|"0.6"  
"123191"|"Abilify 1 MG/ML Oral Solution"|"76351"|"Depression"|"5"|"0.833333"  
"123191"|"Abilify 1 MG/ML Oral Solution"|"76357"|"Major Depression, Recurrent"|"2"|"1"  
"123197"|"Vytorin 10-20 MG Oral Tablet"|"67970"|"Hyperlipidemia"|"26"|"0.361111"  
"123197"|"Vytorin 10-20 MG Oral Tablet"|"68098"|"Lipoid Metabolism Disorder"|"6"|"0.545455"  
"123197"|"Vytorin 10-20 MG Oral Tablet"|"257908"|"Essential Hypertriglyceridemia"|"2"|"0.5"  
"123197"|"Vytorin 10-20 MG Oral Tablet"|"283292"|"Essential Hypercholesterolemia"|"2"|"0.333333"  
"123197"|"Vytorin 10-20 MG Oral Tablet"|"291485"|"Dyslipidemia"|"3"|"0.5"

"123198"|"FentaNYL 50 MCG/HR Transdermal Patch 72 Hour"|"278781"|"Lung Cancer"|"2"|"1"  
"123198"|"FentaNYL 50 MCG/HR Transdermal Patch 72 Hour"|"288921"|"Chronic Pain"|"3"|"0.75"  
"123207"|"Antara 130 MG Oral Capsule"|"67970"|"Hyperlipidemia"|"4"|"0.307692"  
"123210"|"Phytonadione Powder"|"67695"|"Cystic Fibrosis"|"3"|"1"  
"123215"|"Vytorin 10-10 MG Oral Tablet"|"67970"|"Hyperlipidemia"|"11"|"0.44"  
"123215"|"Vytorin 10-10 MG Oral Tablet"|"291485"|"Dyslipidemia"|"3"|"0.5"  
"123216"|"Glycerin (Adult) 2 GM Rectal Suppository"|"166777"|"Constipation"|"2"|"1"  
"123217"|"Vytorin 10-80 MG Oral Tablet"|"67970"|"Hyperlipidemia"|"16"|"0.444444"  
"123217"|"Vytorin 10-80 MG Oral Tablet"|"291485"|"Dyslipidemia"|"2"|"0.5"  
"123225"|"Invirase 500 MG Oral Tablet"|"76835"|"HIV Infection"|"3"|"0.428571"  
"123225"|"Invirase 500 MG Oral Tablet"|"76842"|"Acquired Immunodeficiency Syndrome (AIDS)"|"3"|"1"  
"123231"|"Ergotamine-Caffeine 1-100 MG Oral Tablet"|"74533"|"Migraine Headache"|"2"|"0.666667"  
"123231"|"Ergotamine-Caffeine 1-100 MG Oral Tablet"|"74537"|"Common Migraine (Without Aura)"|"2"|"1"  
"123234"|"Fosamax Plus D 70-2800 MG-UNIT Oral Tablet"|"69341"|"Osteoporosis"|"6"|"0.75"  
"123234"|"Fosamax Plus D 70-2800 MG-UNIT Oral Tablet"|"70472"|"Systemic Lupus Erythematosus"|"2"|"0.666667"  
"123249"|"Fortamet 500 MG Oral Tablet Extended Release 24 Hour"|"69402"|"Diabetes Mellitus Poorly Controlled"|"2"|"1"  
"123259"|"Bisoprolol-Hydrochlorothiazide 2.5-6.25 MG Oral Tablet"|"63470"|"Benign Essential Hypertension"|"2"|"0.666667"  
"123262"|"Ventavis 10 MCG/ML Inhalation Solution"|"63484"|"Pulmonary Hypertension"|"2"|"0.666667"  
"123263"|"Terconazole 0.4 % Vaginal Cream"|"66213"|"Vaginitis"|"17"|"0.566667"  
"123263"|"Terconazole 0.4 % Vaginal Cream"|"66214"|"Candida Albicans Vaginitis"|"11"|"0.733333"  
"123263"|"Terconazole 0.4 % Vaginal Cream"|"66249"|"Vulvovaginitis"|"2"|"0.4"  
"123263"|"Terconazole 0.4 % Vaginal Cream"|"66250"|"Candida Albicans Vulvovaginitis"|"40"|"0.888889"  
"123263"|"Terconazole 0.4 % Vaginal Cream"|"77211"|"Vaginal Candidiasis"|"268"|"0.967509"  
"123263"|"Terconazole 0.4 % Vaginal Cream"|"173522"|"Candidal Intertrigo"|"2"|"0.5"  
"123264"|"FentaNYL 100 MCG/HR Transdermal Patch 72 Hour"|"288921"|"Chronic Pain"|"2"|"0.5"  
"123272"|"Tobramycin Powder"|"62586"|"Chronic Maxillary Sinusitis"|"3"|"0.428571"  
"123272"|"Tobramycin Powder"|"62587"|"Chronic Frontal Sinusitis"|"3"|"0.5"  
"123272"|"Tobramycin Powder"|"62588"|"Chronic Ethmoidal Sinusitis"|"4"|"0.444444"  
"123280"|"RisperDAL Consta 37.5 MG Intramuscular Suspension Reconstituted"|"76272"|"Schizoaffactive Disorder"|"3"|"1"  
"123283"|"Butalbital-ASA-Caff-Codeine 50-325-40-30 MG Oral Capsule"|"74533"|"Migraine Headache"|"3"|"0.75"  
"123298"|"Cilostazol 50 MG Oral Tablet"|"63738"|"Peripheral Vascular Disease"|"6"|"0.857143"  
"123299"|"Allegra-D 24 Hour 180-240 MG TB24"|"62577"|"Sinusitis"|"3"|"0.375"  
"123299"|"Allegra-D 24 Hour 180-240 MG TB24"|"62578"|"Acute Sinusitis"|"5"|"0.263158"  
"123299"|"Allegra-D 24 Hour 180-240 MG TB24"|"62598"|"Allergic Rhinitis"|"45"|"0.625"  
"123299"|"Allegra-D 24 Hour 180-240 MG TB24"|"77891"|"Acute Upper Respiratory Infection"|"7"|"0.21875"  
"123302"|"Gabapentin 400 MG Oral Capsule"|"69424"|"Diabetic Peripheral Neuropathy"|"2"|"0.5"  
"123302"|"Gabapentin 400 MG Oral Capsule"|"75486"|"Trigeminal Neuralgia"|"4"|"1"  
"123302"|"Gabapentin 400 MG Oral Capsule"|"76610"|"Chronic Pain Syndrome"|"3"|"0.428571"  
"123302"|"Gabapentin 400 MG Oral Capsule"|"173442"|"Lumbar Radiculopathy"|"3"|"0.5"  
"123302"|"Gabapentin 400 MG Oral Capsule"|"251467"|"Limb Pain"|"2"|"0.25"  
"123302"|"Gabapentin 400 MG Oral Capsule"|"288933"|"Peripheral Neuropathy"|"3"|"0.428571"  
"123309"|"Benzoyl Peroxide 10 % LIQD"|"69606"|"Acne"|"6"|"1"  
"123325"|"GlyBURIDE-MetFORMIN 1.25-250 MG Oral Tablet"|"69380"|"Diabetes Mellitus"|"2"|"1"  
"123334"|"Tricor 48 MG Oral Tablet"|"67970"|"Hyperlipidemia"|"18"|"0.545455"  
"123334"|"Tricor 48 MG Oral Tablet"|"257908"|"Essential Hypertriglyceridemia"|"4"|"0.571429"  
"123349"|"Amiodarone HCl 400 MG Oral Tablet"|"62916"|"Atrial Fibrillation"|"2"|"0.285714"  
"123352"|"Flovent HFA 110 MCG/ACT Inhalation Aerosol"|"60863"|"Difficulty Breathing (Dyspnea)"|"2"|"0.285714"  
"123352"|"Flovent HFA 110 MCG/ACT Inhalation Aerosol"|"60869"|"Cough"|"9"|"0.321429"  
"123352"|"Flovent HFA 110 MCG/ACT Inhalation Aerosol"|"62598"|"Allergic Rhinitis"|"11"|"0.0628571"  
"123352"|"Flovent HFA 110 MCG/ACT Inhalation Aerosol"|"64180"|"Reactive Airway Disease"|"6"|"0.2"  
"123352"|"Flovent HFA 110 MCG/ACT Inhalation Aerosol"|"64181"|"Asthma"|"150"|"0.588235"

"123352"|"Flovent HFA 110 MCG/ACT Inhalation Aerosol"|"64182"|"Mild Intermittent Asthma"|"5"|"0.277778"  
"123352"|"Flovent HFA 110 MCG/ACT Inhalation Aerosol"|"64183"|"Mild Persistent Asthma"|"6"|"0.3"  
"123352"|"Flovent HFA 110 MCG/ACT Inhalation Aerosol"|"64184"|"Moderate Persistent Asthma"|"3"|"0.12"  
"123352"|"Flovent HFA 110 MCG/ACT Inhalation Aerosol"|"64185"|"Severe Persistent Asthma"|"2"|"0.5"  
"123352"|"Flovent HFA 110 MCG/ACT Inhalation Aerosol"|"64190"|"Exercise-induced Asthma"|"2"|"0.2"  
"123352"|"Flovent HFA 110 MCG/ACT Inhalation Aerosol"|"64205"|"Chronic Obstructive Pulmonary  
Disease"|"4"|"0.5"  
"123352"|"Flovent HFA 110 MCG/ACT Inhalation Aerosol"|"166748"|"Asthma With Acute  
Exacerbation"|"7"|"0.189189"  
"123352"|"Flovent HFA 110 MCG/ACT Inhalation Aerosol"|"257912"|"Disorder Of Mitochondrial  
Metabolism"|"2"|"0.4"  
"123352"|"Flovent HFA 110 MCG/ACT Inhalation Aerosol"|"277881"|"Childhood Asthma"|"2"|"0.25"  
"123352"|"Flovent HFA 110 MCG/ACT Inhalation Aerosol"|"289126"|"Eosinophilic Esophagitis"|"6"|"0.666667"  
"123354"|"Felodipine 10 MG Oral Tablet Extended Release 24 Hour"|"63468"|"Essential Hypertension"|"4"|"0.444444"  
"123354"|"Felodipine 10 MG Oral Tablet Extended Release 24 Hour"|"63470"|"Benign Essential  
Hypertension"|"4"|"0.444444"  
"123381"|"GlyBURIDE-MetFORMIN 5-500 MG Oral Tablet"|"69380"|"Diabetes Mellitus"|"41"|"0.431579"  
"123381"|"GlyBURIDE-MetFORMIN 5-500 MG Oral Tablet"|"69381"|"Type II Diabetes Mellitus"|"14"|"0.378378"  
"123381"|"GlyBURIDE-MetFORMIN 5-500 MG Oral Tablet"|"69382"|"Type II Diabetes Mellitus - Uncomplicated,  
Uncontrolled"|"15"|"0.555556"  
"123381"|"GlyBURIDE-MetFORMIN 5-500 MG Oral Tablet"|"69402"|"Diabetes Mellitus Poorly  
Controlled"|"18"|"0.529412"  
"123381"|"GlyBURIDE-MetFORMIN 5-500 MG Oral Tablet"|"258942"|"Type II Diabetes Mellitus - Uncomplicated,  
Controlled"|"2"|"0.285714"  
"123383"|"Boniva 150 MG Oral Tablet"|"66073"|"Menopause"|"2"|"0.25"  
"123383"|"Boniva 150 MG Oral Tablet"|"69340"|"Osteopenia"|"41"|"0.569444"  
"123383"|"Boniva 150 MG Oral Tablet"|"69341"|"Osteoporosis"|"70"|"0.654206"  
"123383"|"Boniva 150 MG Oral Tablet"|"70455"|"Rheumatoid Arthritis"|"4"|"0.210526"  
"123383"|"Boniva 150 MG Oral Tablet"|"80524"|"Adenocarcinoma Of The Breast"|"3"|"0.5"  
"123384"|"MetFORMIN HCl 750 MG Oral Tablet Extended Release 24 Hour"|"69380"|"Diabetes  
Mellitus"|"10"|"0.588235"  
"123384"|"MetFORMIN HCl 750 MG Oral Tablet Extended Release 24 Hour"|"69381"|"Type II Diabetes  
Mellitus"|"3"|"0.428571"  
"123391"|"Fluticasone Propionate 0.05 % External Cream"|"69923"|"Seborrhea"|"2"|"0.666667"  
"123391"|"Fluticasone Propionate 0.05 % External Cream"|"70112"|"Atopic Dermatitis"|"21"|"0.807692"  
"123391"|"Fluticasone Propionate 0.05 % External Cream"|"93705"|"Dermatitis"|"4"|"0.571429"  
"123391"|"Fluticasone Propionate 0.05 % External Cream"|"278350"|"Eczema"|"3"|"0.176471"  
"123407"|"Gabapentin 300 MG Oral Capsule"|"61070"|"Tingling (Paresthesia)"|"6"|"0.375"  
"123407"|"Gabapentin 300 MG Oral Capsule"|"61072"|"Numbness (Hypesthesia)"|"3"|"0.214286"  
"123407"|"Gabapentin 300 MG Oral Capsule"|"69380"|"Diabetes Mellitus"|"17"|"0.0572391"  
"123407"|"Gabapentin 300 MG Oral Capsule"|"69402"|"Diabetes Mellitus Poorly Controlled"|"16"|"0.163265"  
"123407"|"Gabapentin 300 MG Oral Capsule"|"69424"|"Diabetic Peripheral Neuropathy"|"30"|"0.566038"  
"123407"|"Gabapentin 300 MG Oral Capsule"|"69425"|"Diabetic Peripheral Neuropathy Type II"|"4"|"0.571429"  
"123407"|"Gabapentin 300 MG Oral Capsule"|"69426"|"Diabetic Peripheral Neuropathy Type II -  
Uncontrolled"|"3"|"0.428571"  
"123407"|"Gabapentin 300 MG Oral Capsule"|"69434"|"Diabetic Autonomic Neuropathy"|"2"|"0.333333"  
"123407"|"Gabapentin 300 MG Oral Capsule"|"70455"|"Rheumatoid Arthritis"|"5"|"0.178571"  
"123407"|"Gabapentin 300 MG Oral Capsule"|"70472"|"Systemic Lupus Erythematosus"|"6"|"0.26087"  
"123407"|"Gabapentin 300 MG Oral Capsule"|"74988"|"Seizure Disorder"|"5"|"0.1"  
"123407"|"Gabapentin 300 MG Oral Capsule"|"75054"|"Restless Legs Syndrome"|"9"|"0.333333"  
"123407"|"Gabapentin 300 MG Oral Capsule"|"75124"|"Demyelinating Disorders"|"2"|"0.285714"  
"123407"|"Gabapentin 300 MG Oral Capsule"|"75125"|"Multiple Sclerosis"|"23"|"0.45098"  
"123407"|"Gabapentin 300 MG Oral Capsule"|"75486"|"Trigeminal Neuralgia"|"6"|"0.545455"  
"123407"|"Gabapentin 300 MG Oral Capsule"|"75579"|"Spondylosis Without Myelopathy"|"2"|"0.666667"

"123407""Gabapentin 300 MG Oral Capsule""75587""Lumbar Canal Stenosis""7""0.5"  
"123407""Gabapentin 300 MG Oral Capsule""75590""Postlaminectomy Syndrome (Lumbar)""2""1"  
"123407""Gabapentin 300 MG Oral Capsule""75594""Spinal Stenosis""3""0.3"  
"123407""Gabapentin 300 MG Oral Capsule""75601""Polyneuropathy""10""0.416667"  
"123407""Gabapentin 300 MG Oral Capsule""75613""Postherpetic Polyneuropathy""2""0.4"  
"123407""Gabapentin 300 MG Oral Capsule""75674""Idiopathic Peripheral Neuropathy""3""0.333333"  
"123407""Gabapentin 300 MG Oral Capsule""75717""Cervicalgia""8""0.347826"  
"123407""Gabapentin 300 MG Oral Capsule""75728""Sciatica""7""0.25"  
"123407""Gabapentin 300 MG Oral Capsule""75764""Neuralgia""5""0.416667"  
"123407""Gabapentin 300 MG Oral Capsule""75765""Postherpetic Neuralgia""5""0.5"  
"123407""Gabapentin 300 MG Oral Capsule""75770""Occipital Neuralgia""2""0.666667"  
"123407""Gabapentin 300 MG Oral Capsule""75812""Myalgia And Myositis""3""0.130435"  
"123407""Gabapentin 300 MG Oral Capsule""76610""Chronic Pain Syndrome""4""0.285714"  
"123407""Gabapentin 300 MG Oral Capsule""76794""Herpes Zoster (Shingles)""17""0.708333"  
"123407""Gabapentin 300 MG Oral Capsule""76798""Herpes Zoster With Nervous System  
Complications""2""0.666667"  
"123407""Gabapentin 300 MG Oral Capsule""76847""AIDS Polyneuropathy""2""1"  
"123407""Gabapentin 300 MG Oral Capsule""80847""Renal Cell Carcinoma""2""0.666667"  
"123407""Gabapentin 300 MG Oral Capsule""85614""Joint Pain, Localized In The Hip""5""0.142857"  
"123407""Gabapentin 300 MG Oral Capsule""85623""Joint Pain, Localized In The Knee""7""0.118644"  
"123407""Gabapentin 300 MG Oral Capsule""85638""Ankle Joint Pain""3""0.107143"  
"123407""Gabapentin 300 MG Oral Capsule""85691""Neck Pain""3""0.214286"  
"123407""Gabapentin 300 MG Oral Capsule""91079""Midback Pain""2""0.5"  
"123407""Gabapentin 300 MG Oral Capsule""91089""Lower Back Pain""18""0.243243"  
"123407""Gabapentin 300 MG Oral Capsule""173419""Cervical Radiculopathy""9""0.642857"  
"123407""Gabapentin 300 MG Oral Capsule""173442""Lumbar Radiculopathy""8""0.235294"  
"123407""Gabapentin 300 MG Oral Capsule""251467""Limb Pain""15""0.254237"  
"123407""Gabapentin 300 MG Oral Capsule""252566""Partial Complex Seizure""2""0.285714"  
"123407""Gabapentin 300 MG Oral Capsule""252625""Diabetic Polyneuropathy""3""0.3"  
"123407""Gabapentin 300 MG Oral Capsule""260319""Colon Cancer""2""0.222222"  
"123407""Gabapentin 300 MG Oral Capsule""275592""Post-traumatic Stress Disorder""2""0.333333"  
"123407""Gabapentin 300 MG Oral Capsule""278225""Diabetes With Neurological Complications -  
Uncontrolled""2""1"  
"123407""Gabapentin 300 MG Oral Capsule""278685""Arthralgias In Multiple Sites""2""0.222222"  
"123407""Gabapentin 300 MG Oral Capsule""288921""Chronic Pain""6""0.230769"  
"123407""Gabapentin 300 MG Oral Capsule""288933""Peripheral Neuropathy""53""0.434426"  
"123407""Gabapentin 300 MG Oral Capsule""288977""Fibromyalgia""17""0.485714"  
"123407""Gabapentin 300 MG Oral Capsule""292509""Multisystem Atrophy""2""1"  
"123430""Clarithromycin 250 MG/5ML Oral Suspension Reconstituted""64764""Gastritis Due To H. Pylori""2""1"  
"123439""Polyethylene Glycol 3350 Oral Packet""60899""Abdominal Pain""3""0.272727"  
"123439""Polyethylene Glycol 3350 Oral Packet""65055""Chronic Constipation""8""0.533333"  
"123439""Polyethylene Glycol 3350 Oral Packet""166777""Constipation""52""0.764706"  
"123439""Polyethylene Glycol 3350 Oral Packet""251599""Encopresis With Constipation, Overflow  
Incontinence""3""0.6"  
"123440""Avalide 300-25 MG Oral Tablet""63467""Hypertension""14""0.333333"  
"123440""Avalide 300-25 MG Oral Tablet""63468""Essential Hypertension""5""0.277778"  
"123440""Avalide 300-25 MG Oral Tablet""63470""Benign Essential Hypertension""8""0.347826"  
"123440""Avalide 300-25 MG Oral Tablet""63471""Accelerated Essential Hypertension""2""1"  
"128220""AndroGel Pump 1 % GEL""69214""Hypopituitarism""3""0.75"  
"128220""AndroGel Pump 1 % GEL""69588""Hypogonadism""17""0.586207"  
"128220""AndroGel Pump 1 % GEL""76651""Male Erectile Disorder""5""0.3125"  
"128220""AndroGel Pump 1 % GEL""168513""Hypogonadotrophic Hypogonadism""2""0.5"  
"128246""Golytely 236 GM Oral Solution Reconstituted""65123""Rectal Hemorrhage""2""0.285714"  
"128246""Golytely 236 GM Oral Solution Reconstituted""87834""Red Blood In Bowel Movement

(Hematochezia)"|4|"0.266667"  
"128258"|"Didanosine 400 MG Oral Capsule Delayed Release"|"76835"|"HIV Infection"|"3"|"0.428571"  
"128258"|"Didanosine 400 MG Oral Capsule Delayed Release"|"76842"|"Acquired Immunodeficiency Syndrome (AIDS)"|"2"|"0.666667"  
"128322"|"Childrens Loratadine 5 MG/5ML Oral Syrup"|"62598"|"Allergic Rhinitis"|"10"|"0.769231"  
"128322"|"Childrens Loratadine 5 MG/5ML Oral Syrup"|"278350"|"Eczema"|"2"|"0.666667"  
"128335"|"Tindamax 500 MG Oral Tablet"|"64632"|"Giardiasis"|"4"|"1"  
"128335"|"Tindamax 500 MG Oral Tablet"|"64787"|"Chronic Antral H. Pylori Associated Gastritis"|"2"|"1"  
"128335"|"Tindamax 500 MG Oral Tablet"|"66254"|"Trichomonas Vulvovaginitis"|"3"|"1"  
"128335"|"Tindamax 500 MG Oral Tablet"|"77833"|"Trichomoniasis"|"2"|"0.666667"  
"128335"|"Tindamax 500 MG Oral Tablet"|"288790"|"Bacterial Vaginosis"|"16"|"0.615385"  
"128354"|"VESIcare 5 MG Oral Tablet"|"61076"|"Urinary Loss Of Control"|"4"|"0.444444"  
"128354"|"VESIcare 5 MG Oral Tablet"|"65756"|"Chronic Interstitial Cystitis"|"2"|"1"  
"128354"|"VESIcare 5 MG Oral Tablet"|"65769"|"Neurogenic Bladder"|"3"|"0.6"  
"128354"|"VESIcare 5 MG Oral Tablet"|"65777"|"Urge Incontinence Of Urine"|"10"|"0.47619"  
"128354"|"VESIcare 5 MG Oral Tablet"|"65778"|"Urge And Stress Incontinence"|"11"|"0.733333"  
"128354"|"VESIcare 5 MG Oral Tablet"|"65784"|"Hyperactivity Of The Bladder"|"8"|"0.615385"  
"128354"|"VESIcare 5 MG Oral Tablet"|"65788"|"Detrusor Instability"|"2"|"0.5"  
"128354"|"VESIcare 5 MG Oral Tablet"|"65853"|"Stress Incontinence"|"3"|"0.375"  
"128354"|"VESIcare 5 MG Oral Tablet"|"65855"|"Female Stress Incontinence"|"11"|"0.6875"  
"128354"|"VESIcare 5 MG Oral Tablet"|"75125"|"Multiple Sclerosis"|"3"|"0.2"  
"128354"|"VESIcare 5 MG Oral Tablet"|"87902"|"Urinary Frequency More Than Twice At Night (Nocturia)"|"2"|"0.2"  
"128354"|"VESIcare 5 MG Oral Tablet"|"87904"|"Feelings Of Urinary Urgency"|"5"|"0.454545"  
"128354"|"VESIcare 5 MG Oral Tablet"|"251181"|"Urinary Frequency"|"6"|"0.6"  
"128354"|"VESIcare 5 MG Oral Tablet"|"289131"|"Benign Prostatic Hypertrophy"|"3"|"0.214286"  
"128354"|"VESIcare 5 MG Oral Tablet"|"296638"|"Urinary Incontinence"|"17"|"0.68"  
"128354"|"VESIcare 5 MG Oral Tablet"|"296642"|"Functional Urinary Incontinence"|"2"|"1"  
"128373"|"Clotrimazole 10 MG Mouth/Throat Troche"|"77206"|"Oral Thrush"|"6"|"1"  
"128375"|"GliPiZIDE XL 2.5 MG Oral Tablet Extended Release 24 Hour"|"69380"|"Diabetes Mellitus"|"3"|"0.5"  
"128398"|"Cefpodoxime Proxetil 200 MG Oral Tablet"|"62578"|"Acute Sinusitis"|"3"|"1"  
"128398"|"Cefpodoxime Proxetil 200 MG Oral Tablet"|"65762"|"Urinary Tract Infection"|"6"|"0.857143"  
"128415"|"GliPiZIDE XL 5 MG Oral Tablet Extended Release 24 Hour"|"69380"|"Diabetes Mellitus"|"2"|"0.222222"  
"128415"|"GliPiZIDE XL 5 MG Oral Tablet Extended Release 24 Hour"|"69381"|"Type II Diabetes Mellitus"|"4"|"0.666667"  
"128415"|"GliPiZIDE XL 5 MG Oral Tablet Extended Release 24 Hour"|"69402"|"Diabetes Mellitus Poorly Controlled"|"5"|"0.714286"  
"128432"|"Xifaxan 200 MG Oral Tablet"|"64934"|"Small Bowel Bacterial Overgrowth"|"6"|"0.857143"  
"128460"|"MetroNIDAZOLE 0.75 % External Cream"|"69913"|"Rosacea"|"7"|"0.777778"  
"128460"|"MetroNIDAZOLE 0.75 % External Cream"|"288790"|"Bacterial Vaginosis"|"2"|"1"  
"128474"|"NIFEdipine 30 MG Oral Tablet Extended Release 24 Hour"|"62975"|"Coronary Artery Disease"|"3"|"0.157895"  
"128474"|"NIFEdipine 30 MG Oral Tablet Extended Release 24 Hour"|"63467"|"Hypertension"|"18"|"0.36"  
"128474"|"NIFEdipine 30 MG Oral Tablet Extended Release 24 Hour"|"63468"|"Essential Hypertension"|"7"|"0.269231"  
"128474"|"NIFEdipine 30 MG Oral Tablet Extended Release 24 Hour"|"63470"|"Benign Essential Hypertension"|"11"|"0.458333"  
"128474"|"NIFEdipine 30 MG Oral Tablet Extended Release 24 Hour"|"63758"|"Raynaud's Disease"|"3"|"0.5"  
"128474"|"NIFEdipine 30 MG Oral Tablet Extended Release 24 Hour"|"70475"|"Scleroderma"|"2"|"0.285714"  
"128482"|"Bisoprolol-Hydrochlorothiazide 5-6.25 MG Oral Tablet"|"63467"|"Hypertension"|"3"|"0.3"  
"128493"|"Hectorol 0.5 MCG Oral Capsule"|"68058"|"Vitamin D Deficiency"|"3"|"0.2"  
"128493"|"Hectorol 0.5 MCG Oral Capsule"|"258937"|"Renal Secondary Hyperparathyroidism"|"5"|"0.357143"  
"128493"|"Hectorol 0.5 MCG Oral Capsule"|"274606"|"Chronic Kidney Disease, Stage 3"|"4"|"0.285714"  
"128520"|"Dilt-CD 180 MG Oral Capsule Extended Release 24 Hour"|"62916"|"Atrial Fibrillation"|"2"|"0.666667"  
"128526"|"Didanosine 200 MG Oral Capsule Delayed Release"|"76835"|"HIV Infection"|"6"|"1"

"128556"|"VESIcare 10 MG Oral Tablet"|"65769"|"Neurogenic Bladder"|"2"|"0.285714"  
"128556"|"VESIcare 10 MG Oral Tablet"|"65777"|"Urge Incontinence Of Urine"|"3"|"0.272727"  
"128556"|"VESIcare 10 MG Oral Tablet"|"65788"|"Detrusor Instability"|"2"|"0.4"  
"128556"|"VESIcare 10 MG Oral Tablet"|"65853"|"Stress Incontinence"|"2"|"0.285714"  
"128556"|"VESIcare 10 MG Oral Tablet"|"65855"|"Female Stress Incontinence"|"2"|"1"  
"128556"|"VESIcare 10 MG Oral Tablet"|"75125"|"Multiple Sclerosis"|"8"|"0.5"  
"128556"|"VESIcare 10 MG Oral Tablet"|"87904"|"Feelings Of Urinary Urgency"|"4"|"0.4"  
"128556"|"VESIcare 10 MG Oral Tablet"|"296638"|"Urinary Incontinence"|"5"|"0.3125"  
"128571"|"GlycoLax Oral Powder"|"166777"|"Constipation"|"3"|"0.6"  
"128614"|"Fluconazole 200 MG Oral Tablet"|"66213"|"Vaginitis"|"10"|"0.5"  
"128614"|"Fluconazole 200 MG Oral Tablet"|"66214"|"Candida Albicans Vaginitis"|"5"|"1"  
"128614"|"Fluconazole 200 MG Oral Tablet"|"66250"|"Candida Albicans Vulvovaginitis"|"4"|"1"  
"128614"|"Fluconazole 200 MG Oral Tablet"|"70115"|"Dermatophytosis"|"3"|"1"  
"128614"|"Fluconazole 200 MG Oral Tablet"|"70119"|"Onychomycosis"|"3"|"0.75"  
"128614"|"Fluconazole 200 MG Oral Tablet"|"70122"|"Tinea Pedis"|"2"|"0.666667"  
"128614"|"Fluconazole 200 MG Oral Tablet"|"70124"|"Tinea Corporis"|"3"|"0.375"  
"128614"|"Fluconazole 200 MG Oral Tablet"|"74027"|"Osteomyelitis"|"2"|"0.666667"  
"128614"|"Fluconazole 200 MG Oral Tablet"|"74632"|"Coccidioidal Meningitis"|"2"|"0.666667"  
"128614"|"Fluconazole 200 MG Oral Tablet"|"76835"|"HIV Infection"|"7"|"0.2"  
"128614"|"Fluconazole 200 MG Oral Tablet"|"76842"|"Acquired Immunodeficiency Syndrome (AIDS)"|"4"|"0.181818"  
"128614"|"Fluconazole 200 MG Oral Tablet"|"77205"|"Candidiasis"|"2"|"0.666667"  
"128614"|"Fluconazole 200 MG Oral Tablet"|"77206"|"Oral Thrush"|"13"|"0.52"  
"128614"|"Fluconazole 200 MG Oral Tablet"|"77207"|"Esophageal Candidiasis"|"3"|"0.6"  
"128614"|"Fluconazole 200 MG Oral Tablet"|"77211"|"Vaginal Candidiasis"|"13"|"0.619048"  
"128614"|"Fluconazole 200 MG Oral Tablet"|"77233"|"Cryptococcal Pneumonia"|"3"|"1"  
"128614"|"Fluconazole 200 MG Oral Tablet"|"88375"|"Skin: A Rash"|"4"|"0.4"  
"128614"|"Fluconazole 200 MG Oral Tablet"|"173525"|"Candidal Balanitis"|"2"|"1"  
"128614"|"Fluconazole 200 MG Oral Tablet"|"283255"|"Balanitis"|"2"|"0.666667"  
"128614"|"Fluconazole 200 MG Oral Tablet"|"288761"|"Vaginal Discharge"|"5"|"0.454545"  
"128624"|"Tricor 145 MG Oral Tablet"|"67969"|"Familial Combined Hyperlipidemia"|"2"|"0.25"  
"128624"|"Tricor 145 MG Oral Tablet"|"67970"|"Hyperlipidemia"|"91"|"0.502762"  
"128624"|"Tricor 145 MG Oral Tablet"|"67974"|"Frederickson Type IIB Hyperlipidemia"|"3"|"1"  
"128624"|"Tricor 145 MG Oral Tablet"|"257908"|"Essential Hypertriglyceridemia"|"19"|"0.678571"  
"128624"|"Tricor 145 MG Oral Tablet"|"283291"|"Hypercholesterolemia"|"6"|"0.352941"  
"128624"|"Tricor 145 MG Oral Tablet"|"283292"|"Essential Hypercholesterolemia"|"5"|"0.357143"  
"128624"|"Tricor 145 MG Oral Tablet"|"291485"|"Dyslipidemia"|"9"|"0.473684"  
"128629"|"BuPROPion HCl (Smoking Deter) 150 MG Oral Tablet Extended Release 12 Hour"|"76090"|"Nicotine Dependence"|"4"|"0.666667"  
"128629"|"BuPROPion HCl (Smoking Deter) 150 MG Oral Tablet Extended Release 12 Hour"|"76351"|"Depression"|"2"|"0.5"  
"128646"|"NIFEdipine 60 MG Oral Tablet Extended Release 24 Hour"|"63467"|"Hypertension"|"22"|"0.354839"  
"128646"|"NIFEdipine 60 MG Oral Tablet Extended Release 24 Hour"|"63468"|"Essential Hypertension"|"12"|"0.48"  
"128646"|"NIFEdipine 60 MG Oral Tablet Extended Release 24 Hour"|"63470"|"Benign Essential Hypertension"|"11"|"0.392857"  
"128646"|"NIFEdipine 60 MG Oral Tablet Extended Release 24 Hour"|"63758"|"Raynaud's Disease"|"2"|"0.666667"  
"128653"|"Dilt-CD 120 MG Oral Capsule Extended Release 24 Hour"|"63467"|"Hypertension"|"2"|"1"  
"128667"|"Tobramycin Sulfate 80 MG/2ML Injection Solution"|"62719"|"Acute Tracheitis"|"2"|"0.4"  
"128671"|"Generlac 10 GM/15ML Oral Solution"|"166777"|"Constipation"|"3"|"0.6"  
"128683"|"Ranitidine Acid Reducer 75 MG Oral Tablet"|"64688"|"Esophageal Reflux"|"2"|"1"  
"128703"|"LevOCARNitine 330 MG Oral Tablet"|"257912"|"Disorder Of Mitochondrial Metabolism"|"8"|"0.666667"  
"128711"|"Mupirocin Powder"|"62582"|"Acute Ethmoidal Sinusitis"|"4"|"0.285714"  
"128711"|"Mupirocin Powder"|"62585"|"Chronic Sinusitis"|"5"|"0.263158"  
"128711"|"Mupirocin Powder"|"62586"|"Chronic Maxillary Sinusitis"|"34"|"0.377778"  
"128711"|"Mupirocin Powder"|"62587"|"Chronic Frontal Sinusitis"|"16"|"0.2"

"128711"|"Mupirocin Powder"|"62588"|"Chronic Ethmoidal Sinusitis"|"67"|"0.632075"  
"128737"|"Butalbital-APAP-Caff-Cod 50-325-40-30 MG Oral Capsule"|"60828"|"Headache"|"2"|"0.285714"  
"128737"|"Butalbital-APAP-Caff-Cod 50-325-40-30 MG Oral Capsule"|"74533"|"Migraine Headache"|"2"|"0.5"  
"128737"|"Butalbital-APAP-Caff-Cod 50-325-40-30 MG Oral Capsule"|"74537"|"Common Migraine (Without  
Aura)"|"4"|"0.8"  
"128748"|"Mesalamine 4 GM Rectal Enema"|"65041"|"Ulcerative Colitis"|"3"|"0.6"  
"128757"|"Metoprolol-Hydrochlorothiazide 100-25 MG Oral Tablet"|"63467"|"Hypertension"|"4"|"1"  
"128766"|"Bisoprolol-Hydrochlorothiazide 10-6.25 MG Oral Tablet"|"63467"|"Hypertension"|"6"|"0.461538"  
"128766"|"Bisoprolol-Hydrochlorothiazide 10-6.25 MG Oral Tablet"|"63470"|"Benign Essential  
Hypertension"|"3"|"0.5"  
"128794"|"Lodrane 24 12 MG Oral Capsule Extended Release 24 Hour"|"62598"|"Allergic Rhinitis"|"2"|"1"  
"128795"|"MethylPREDNISolone Sodium Succ 40 MG Injection Solution Reconstituted"|"69710"|"Contact  
Dermatitis"|"2"|"1"  
"128797"|"Dilt-CD 240 MG Oral Capsule Extended Release 24 Hour"|"63467"|"Hypertension"|"3"|"0.375"  
"128823"|"Enulose 10 GM/15ML Oral Solution"|"166777"|"Constipation"|"19"|"0.791667"  
"128852"|"Albuterol Sulfate 1.25 MG/3ML Inhalation Nebulization Solution"|"64181"|"Asthma"|"14"|"0.518519"  
"128852"|"Albuterol Sulfate 1.25 MG/3ML Inhalation Nebulization Solution"|"64205"|"Chronic Obstructive  
Pulmonary Disease"|"3"|"0.6"  
"128863"|"Ciprofloxacin Powder"|"62586"|"Chronic Maxillary Sinusitis"|"2"|"1"  
"128867"|"MethylPREDNISolone Sodium Succ 1000 MG Injection Solution Reconstituted"|"75125"|"Multiple  
Sclerosis"|"5"|"0.625"  
"128871"|"Micardis HCT 80-25 MG Oral Tablet"|"63467"|"Hypertension"|"5"|"0.416667"  
"128871"|"Micardis HCT 80-25 MG Oral Tablet"|"63468"|"Essential Hypertension"|"2"|"0.4"  
"128871"|"Micardis HCT 80-25 MG Oral Tablet"|"63470"|"Benign Essential Hypertension"|"3"|"0.6"  
"128893"|"Metoprolol-Hydrochlorothiazide 100-50 MG Oral Tablet"|"63467"|"Hypertension"|"2"|"0.5"  
"128937"|"Selenium Sulfide 1 % External Lotion"|"70134"|"Seborrhea Capitis"|"4"|"0.666667"  
"128943"|"Didanosine 250 MG Oral Capsule Delayed Release"|"76835"|"HIV Infection"|"17"|"0.85"  
"128954"|"Fosinopril Sodium-HCTZ 10-12.5 MG Oral Tablet"|"63468"|"Essential Hypertension"|"2"|"1"  
"128960"|"Truvada 200-300 MG Oral Tablet"|"76835"|"HIV Infection"|"83"|"0.70339"  
"128960"|"Truvada 200-300 MG Oral Tablet"|"76842"|"Acquired Immunodeficiency Syndrome  
(AIDS)"|"29"|"0.630435"  
"128960"|"Truvada 200-300 MG Oral Tablet"|"94386"|"Exposed To HIV Infection"|"5"|"0.416667"  
"128960"|"Truvada 200-300 MG Oral Tablet"|"203255"|"Patient Education - HIV"|"2"|"0.4"  
"129019"|"Enbrel 50 MG/ML Subcutaneous Solution"|"70455"|"Rheumatoid Arthritis"|"45"|"0.75"  
"129019"|"Enbrel 50 MG/ML Subcutaneous Solution"|"70706"|"Ankylosing Spondylitis"|"3"|"0.428571"  
"129019"|"Enbrel 50 MG/ML Subcutaneous Solution"|"70719"|"Psoriatic Arthropathy"|"13"|"0.866667"  
"129023"|"BuPROPion HCl 200 MG Oral Tablet Extended Release 12 Hour"|"76351"|"Depression"|"4"|"0.666667"  
"129039"|"Nifediac CC 90 MG Oral Tablet Extended Release 24 Hour"|"63467"|"Hypertension"|"4"|"0.666667"  
"129039"|"Nifediac CC 90 MG Oral Tablet Extended Release 24 Hour"|"63470"|"Benign Essential  
Hypertension"|"2"|"1"  
"129042"|"Nutropin AQ 10 MG/2ML Subcutaneous Solution"|"67687"|"Growth Hormone Deficiency (Pituitary  
Dwarfism)"|"2"|"0.666667"  
"129042"|"Nutropin AQ 10 MG/2ML Subcutaneous Solution"|"69214"|"Hypopituitarism"|"4"|"0.666667"  
"129070"|"Lutera 0.1-20 MG-MCG Oral Tablet"|"187792"|"Gynecologic Services Contraceptive  
Management"|"3"|"0.5"  
"129070"|"Lutera 0.1-20 MG-MCG Oral Tablet"|"250989"|"Oral Contraceptives"|"2"|"0.666667"  
"129075"|"Tindamax 250 MG Oral Tablet"|"64764"|"Gastritis Due To H. Pylori"|"4"|"1"  
"129075"|"Tindamax 250 MG Oral Tablet"|"288790"|"Bacterial Vaginosis"|"2"|"1"  
"129095"|"Cefpodoxime Proxetil 100 MG Oral Tablet"|"62577"|"Sinusitis"|"2"|"1"  
"129095"|"Cefpodoxime Proxetil 100 MG Oral Tablet"|"62578"|"Acute Sinusitis"|"2"|"0.4"  
"129095"|"Cefpodoxime Proxetil 100 MG Oral Tablet"|"65752"|"Cystitis"|"2"|"1"  
"129095"|"Cefpodoxime Proxetil 100 MG Oral Tablet"|"65762"|"Urinary Tract Infection"|"7"|"0.538462"  
"129103"|"Metoprolol-Hydrochlorothiazide 50-25 MG Oral Tablet"|"63467"|"Hypertension"|"2"|"0.333333"  
"129103"|"Metoprolol-Hydrochlorothiazide 50-25 MG Oral Tablet"|"63468"|"Essential Hypertension"|"2"|"0.666667"

"129113"|"Foltx 2.5-25-2 MG Oral Tablet"|"67970"|"Hyperlipidemia"|"5"|"0.16129"  
"129113"|"Foltx 2.5-25-2 MG Oral Tablet"|"68058"|"Vitamin D Deficiency"|"2"|"0.222222"  
"129113"|"Foltx 2.5-25-2 MG Oral Tablet"|"257896"|"Homocysteinemia"|"8"|"0.533333"  
"129121"|"Alinia 500 MG Oral Tablet"|"60902"|"Diarrhea (Symptom)"|"2"|"0.4"  
"129135"|"GlipiZIDE XL 10 MG Oral Tablet Extended Release 24 Hour"|"69380"|"Diabetes Mellitus"|"7"|"0.368421"  
"129135"|"GlipiZIDE XL 10 MG Oral Tablet Extended Release 24 Hour"|"69381"|"Type II Diabetes Mellitus"|"4"|"0.4"  
"129135"|"GlipiZIDE XL 10 MG Oral Tablet Extended Release 24 Hour"|"69402"|"Diabetes Mellitus Poorly Controlled"|"5"|"0.555556"  
"129160"|"Fluticasone Propionate 0.005 % External Ointment"|"278350"|"Eczema"|"2"|"1"  
"129162"|"Epzicom 600-300 MG Oral Tablet"|"76835"|"HIV Infection"|"24"|"0.75"  
"129162"|"Epzicom 600-300 MG Oral Tablet"|"76842"|"Acquired Immunodeficiency Syndrome (AIDS)"|"8"|"0.533333"  
"129197"|"Amoxicillin-Pot Clavulanate 600-42.9 MG/5ML Oral Suspension Reconstituted"|"64181"|"Asthma"|"3"|"0.125"  
"129197"|"Amoxicillin-Pot Clavulanate 600-42.9 MG/5ML Oral Suspension Reconstituted"|"251528"|"Acute Otitis Media"|"8"|"0.615385"  
"130253"|"Focalin XR 20 MG Oral Capsule Extended Release 24 Hour"|"75818"|"Attention-deficit Hyperactivity Disorder"|"2"|"0.4"  
"130253"|"Focalin XR 20 MG Oral Capsule Extended Release 24 Hour"|"275486"|"ADHD, Combined Type"|"8"|"0.8"  
"130292"|"Focalin XR 5 MG Oral Capsule Extended Release 24 Hour"|"75819"|"ADHD, Predominantly Inattentive Type"|"2"|"1"  
"130292"|"Focalin XR 5 MG Oral Capsule Extended Release 24 Hour"|"275486"|"ADHD, Combined Type"|"6"|"0.75"  
"130314"|"GlucaGen HypoKit 1 MG Injection Solution Reconstituted"|"69388"|"Type I Diabetes Mellitus - Uncontrolled"|"3"|"1"  
"130323"|"Focalin XR 10 MG Oral Capsule Extended Release 24 Hour"|"75819"|"ADHD, Predominantly Inattentive Type"|"3"|"1"  
"130323"|"Focalin XR 10 MG Oral Capsule Extended Release 24 Hour"|"275486"|"ADHD, Combined Type"|"19"|"0.904762"  
"130340"|"Xeroform Petrolatum Dressing External Miscellaneous"|"81584"|"Burns"|"7"|"1"  
"130340"|"Xeroform Petrolatum Dressing External Miscellaneous"|"82470"|"Traumatic Amputation Of Finger(S)"|"2"|"1"  
"130437"|"Zemplar 1 MCG Oral Capsule"|"68058"|"Vitamin D Deficiency"|"2"|"0.333333"  
"130437"|"Zemplar 1 MCG Oral Capsule"|"258937"|"Renal Secondary Hyperparathyroidism"|"8"|"0.615385"  
"130437"|"Zemplar 1 MCG Oral Capsule"|"274689"|"Chronic Kidney Disease With Benign Hypertension"|"2"|"0.285714"  
"130445"|"Corvite 1.25 MG Oral Tablet"|"77962"|"Anemia"|"2"|"1"  
"130450"|"LevOCARNitine 1 GM/10ML Oral Solution"|"74988"|"Seizure Disorder"|"3"|"0.136364"  
"130450"|"LevOCARNitine 1 GM/10ML Oral Solution"|"252543"|"Encephalopathy"|"2"|"0.2"  
"130450"|"LevOCARNitine 1 GM/10ML Oral Solution"|"257912"|"Disorder Of Mitochondrial Metabolism"|"48"|"0.827586"  
"130450"|"LevOCARNitine 1 GM/10ML Oral Solution"|"275496"|"Autistic Disorder"|"4"|"0.235294"  
"130450"|"LevOCARNitine 1 GM/10ML Oral Solution"|"292099"|"Medium-chain Acyl-CoA Dehydrogenase Deficiency"|"2"|"1"  
"130522"|"Byetta 10 MCG Pen 10 MCG/0.04ML Subcutaneous Solution"|"69380"|"Diabetes Mellitus"|"14"|"0.168675"  
"130522"|"Byetta 10 MCG Pen 10 MCG/0.04ML Subcutaneous Solution"|"69381"|"Type II Diabetes Mellitus"|"31"|"0.369048"  
"130522"|"Byetta 10 MCG Pen 10 MCG/0.04ML Subcutaneous Solution"|"69382"|"Type II Diabetes Mellitus - Uncomplicated, Uncontrolled"|"5"|"0.263158"  
"130522"|"Byetta 10 MCG Pen 10 MCG/0.04ML Subcutaneous Solution"|"69402"|"Diabetes Mellitus Poorly Controlled"|"31"|"0.455882"  
"130536"|"Byetta 5 MCG Pen 5 MCG/0.02ML Subcutaneous Solution"|"69380"|"Diabetes Mellitus"|"10"|"0.25641"  
"130536"|"Byetta 5 MCG Pen 5 MCG/0.02ML Subcutaneous Solution"|"69381"|"Type II Diabetes Mellitus"|"6"|"0.222222"

"130536"|"Byetta 5 MCG Pen 5 MCG/0.02ML Subcutaneous Solution"|"69382"|"Type II Diabetes Mellitus - Uncomplicated, Uncontrolled"|"6"|"0.545455"  
"130536"|"Byetta 5 MCG Pen 5 MCG/0.02ML Subcutaneous Solution"|"69386"|"Type II Diabetes Mellitus With Complication - Uncontrolled"|"2"|"1"  
"130536"|"Byetta 5 MCG Pen 5 MCG/0.02ML Subcutaneous Solution"|"69402"|"Diabetes Mellitus Poorly Controlled"|"6"|"0.315789"  
"130700"|"Metrogel 1 % External Gel"|"69606"|"Acne"|"2"|"0.5"  
"130700"|"Metrogel 1 % External Gel"|"69913"|"Rosacea"|"8"|"0.533333"  
"130700"|"Metrogel 1 % External Gel"|"288790"|"Bacterial Vaginosis"|"2"|"1"  
"130701"|"Desmopressin Acetate 0.2 MG Oral Tablet"|"69214"|"Hypopituitarism"|"4"|"0.571429"  
"130701"|"Desmopressin Acetate 0.2 MG Oral Tablet"|"69542"|"Central Diabetes Insipidus"|"6"|"0.6"  
"130701"|"Desmopressin Acetate 0.2 MG Oral Tablet"|"75880"|"Enuresis"|"9"|"0.75"  
"130701"|"Desmopressin Acetate 0.2 MG Oral Tablet"|"196042"|"Primary Nocturnal Enuresis"|"4"|"0.8"  
"130701"|"Desmopressin Acetate 0.2 MG Oral Tablet"|"196093"|"Primary Enuresis"|"3"|"1"  
"130703"|"Megace ES 625 MG/5ML Oral Suspension"|"60880"|"Appetite Lost (Anorexia)"|"3"|"0.75"  
"130703"|"Megace ES 625 MG/5ML Oral Suspension"|"179542"|"Malignant Breast Neoplasm"|"2"|"1"  
"130703"|"Megace ES 625 MG/5ML Oral Suspension"|"278781"|"Lung Cancer"|"2"|"0.666667"  
"130707"|"Ayr Saline Nasal Gel Nasal Swab"|"62616"|"Epistaxis"|"3"|"0.6"  
"130711"|"Desmopressin Acetate 0.1 MG Oral Tablet"|"69214"|"Hypopituitarism"|"4"|"0.666667"  
"130711"|"Desmopressin Acetate 0.1 MG Oral Tablet"|"69542"|"Central Diabetes Insipidus"|"6"|"0.6"  
"130730"|"CefTRIAXone Sodium 500 MG Injection Solution Reconstituted"|"62578"|"Acute Sinusitis"|"2"|"0.5"  
"130735"|"Asmanex 60 Metered Doses 220 MCG/INH Inhalation Aerosol Powder Breath Activated"|"64181"|"Asthma"|"3"|"1"  
"130736"|"CefTRIAXone Sodium 1 GM Injection Solution Reconstituted"|"64118"|"Acute Bronchitis"|"2"|"0.4"  
"130736"|"CefTRIAXone Sodium 1 GM Injection Solution Reconstituted"|"64126"|"Pneumonia"|"4"|"0.8"  
"130736"|"CefTRIAXone Sodium 1 GM Injection Solution Reconstituted"|"64170"|"Bronchopneumonia"|"2"|"1"  
"130736"|"CefTRIAXone Sodium 1 GM Injection Solution Reconstituted"|"65762"|"Urinary Tract Infection"|"2"|"0.5"  
"130736"|"CefTRIAXone Sodium 1 GM Injection Solution Reconstituted"|"277876"|"Lobar Pneumonia"|"8"|"0.888889"  
"130743"|"Revatio 20 MG Oral Tablet"|"63467"|"Hypertension"|"3"|"0.12"  
"130743"|"Revatio 20 MG Oral Tablet"|"63484"|"Pulmonary Hypertension"|"19"|"0.59375"  
"130743"|"Revatio 20 MG Oral Tablet"|"63485"|"Primary Pulmonary Hypertension"|"3"|"1"  
"130743"|"Revatio 20 MG Oral Tablet"|"63488"|"Secondary Pulmonary Hypertension"|"6"|"0.545455"  
"130743"|"Revatio 20 MG Oral Tablet"|"63758"|"Raynaud's Disease"|"7"|"0.4375"  
"130743"|"Revatio 20 MG Oral Tablet"|"63759"|"Raynaud's Phenomenon"|"2"|"0.333333"  
"130743"|"Revatio 20 MG Oral Tablet"|"69660"|"Chronic Cutaneous Ulcer"|"4"|"0.4"  
"130743"|"Revatio 20 MG Oral Tablet"|"70475"|"Scleroderma"|"9"|"0.3"  
"130743"|"Revatio 20 MG Oral Tablet"|"247012"|"Shortness Of Breath"|"2"|"0.4"  
"130744"|"CefTRIAXone Sodium 250 MG Injection Solution Reconstituted"|"65847"|"Urethritis"|"3"|"0.6"  
"130744"|"CefTRIAXone Sodium 250 MG Injection Solution Reconstituted"|"65878"|"Acute Gonorrhea"|"4"|"0.666667"  
"130744"|"CefTRIAXone Sodium 250 MG Injection Solution Reconstituted"|"77872"|"Pelvic Inflammatory Disease"|"2"|"1"  
"130744"|"CefTRIAXone Sodium 250 MG Injection Solution Reconstituted"|"94408"|"Exposed To Venereal Disease"|"3"|"0.75"  
"130744"|"CefTRIAXone Sodium 250 MG Injection Solution Reconstituted"|"94409"|"Exposed To Gonorrhea"|"6"|"1"  
"130767"|"Accu-Chek Aviva In Vitro Strip"|"66433"|"Pregnancy Complicated By Diabetes Mellitus"|"2"|"1"  
"130767"|"Accu-Chek Aviva In Vitro Strip"|"69380"|"Diabetes Mellitus"|"19"|"0.38"  
"130767"|"Accu-Chek Aviva In Vitro Strip"|"69381"|"Type II Diabetes Mellitus"|"11"|"0.392857"  
"130767"|"Accu-Chek Aviva In Vitro Strip"|"69382"|"Type II Diabetes Mellitus - Uncomplicated, Uncontrolled"|"4"|"0.571429"  
"130767"|"Accu-Chek Aviva In Vitro Strip"|"69387"|"Type I Diabetes Mellitus"|"3"|"0.333333"  
"130767"|"Accu-Chek Aviva In Vitro Strip"|"69388"|"Type I Diabetes Mellitus - Uncontrolled"|"3"|"0.5"  
"130767"|"Accu-Chek Aviva In Vitro Strip"|"69401"|"Diabetes Mellitus Under Control"|"2"|"0.666667"

"130767"|"Accu-Chek Aviva In Vitro Strip"|"69402"|"Diabetes Mellitus Poorly Controlled"|"23"|"0.676471"  
"130767"|"Accu-Chek Aviva In Vitro Strip"|"258942"|"Type II Diabetes Mellitus - Uncomplicated,  
Controlled"|"3"|"0.5"  
"130768"|"Accu-Chek Multiclix Lancets Miscellaneous"|"69380"|"Diabetes Mellitus"|"8"|"0.258065"  
"130768"|"Accu-Chek Multiclix Lancets Miscellaneous"|"69381"|"Type II Diabetes Mellitus"|"7"|"0.368421"  
"130768"|"Accu-Chek Multiclix Lancets Miscellaneous"|"69382"|"Type II Diabetes Mellitus - Uncomplicated,  
Uncontrolled"|"2"|"0.4"  
"130768"|"Accu-Chek Multiclix Lancets Miscellaneous"|"69387"|"Type I Diabetes Mellitus"|"4"|"0.8"  
"130768"|"Accu-Chek Multiclix Lancets Miscellaneous"|"69388"|"Type I Diabetes Mellitus -  
Uncontrolled"|"5"|"0.625"  
"130768"|"Accu-Chek Multiclix Lancets Miscellaneous"|"69402"|"Diabetes Mellitus Poorly Controlled"|"17"|"0.62963"  
"130801"|"Accu-Chek Aviva KIT"|"69380"|"Diabetes Mellitus"|"3"|"0.75"  
"130842"|"Leflunomide 20 MG Oral Tablet"|"70455"|"Rheumatoid Arthritis"|"60"|"0.869565"  
"130842"|"Leflunomide 20 MG Oral Tablet"|"70475"|"Scleroderma"|"4"|"0.444444"  
"130842"|"Leflunomide 20 MG Oral Tablet"|"70719"|"Psoriatic Arthropathy"|"8"|"0.888889"  
"130842"|"Leflunomide 20 MG Oral Tablet"|"70722"|"Spondylitis"|"2"|"0.666667"  
"130859"|"Acetaminophen 650 MG Oral Tablet Extended Release"|"60828"|"Headache"|"2"|"1"  
"130859"|"Acetaminophen 650 MG Oral Tablet Extended Release"|"70146"|"Osteoarthritis"|"3"|"0.75"  
"130860"|"Lyrica 100 MG Oral Capsule"|"69424"|"Diabetic Peripheral Neuropathy"|"2"|"0.285714"  
"130860"|"Lyrica 100 MG Oral Capsule"|"69426"|"Diabetic Peripheral Neuropathy Type II -  
Uncontrolled"|"2"|"0.666667"  
"130860"|"Lyrica 100 MG Oral Capsule"|"73666"|"Backache"|"3"|"0.272727"  
"130860"|"Lyrica 100 MG Oral Capsule"|"75002"|"Partial Complex Psychomotor Seizure With Intractable  
Seizure"|"3"|"0.75"  
"130860"|"Lyrica 100 MG Oral Capsule"|"75125"|"Multiple Sclerosis"|"5"|"0.5"  
"130860"|"Lyrica 100 MG Oral Capsule"|"75601"|"Polyneuropathy"|"2"|"0.4"  
"130860"|"Lyrica 100 MG Oral Capsule"|"75812"|"Myalgia And Myositis"|"3"|"0.6"  
"130860"|"Lyrica 100 MG Oral Capsule"|"76847"|"AIDS Polyneuropathy"|"3"|"1"  
"130860"|"Lyrica 100 MG Oral Capsule"|"288933"|"Peripheral Neuropathy"|"7"|"0.4375"  
"130860"|"Lyrica 100 MG Oral Capsule"|"288977"|"Fibromyalgia"|"3"|"0.230769"  
"130864"|"Dicyclomine HCl 10 MG/5ML Oral Solution"|"60899"|"Abdominal Pain"|"2"|"0.5"  
"130879"|"Fexofenadine HCl 30 MG Oral Tablet"|"62598"|"Allergic Rhinitis"|"7"|"0.5"  
"130917"|"Fexofenadine HCl 180 MG Oral Tablet"|"60869"|"Cough"|"23"|"0.158621"  
"130917"|"Fexofenadine HCl 180 MG Oral Tablet"|"61029"|"Itching (Pruritus)"|"4"|"0.4"  
"130917"|"Fexofenadine HCl 180 MG Oral Tablet"|"62577"|"Sinusitis"|"4"|"0.111111"  
"130917"|"Fexofenadine HCl 180 MG Oral Tablet"|"62578"|"Acute Sinusitis"|"15"|"0.153061"  
"130917"|"Fexofenadine HCl 180 MG Oral Tablet"|"62585"|"Chronic Sinusitis"|"3"|"0.12"  
"130917"|"Fexofenadine HCl 180 MG Oral Tablet"|"62597"|"Rhinitis"|"3"|"0.5"  
"130917"|"Fexofenadine HCl 180 MG Oral Tablet"|"62598"|"Allergic Rhinitis"|"387"|"0.730189"  
"130917"|"Fexofenadine HCl 180 MG Oral Tablet"|"62599"|"Allergic Rhinitis Due To Pollen"|"8"|"0.888889"  
"130917"|"Fexofenadine HCl 180 MG Oral Tablet"|"62611"|"Chronic Rhinitis"|"6"|"0.4"  
"130917"|"Fexofenadine HCl 180 MG Oral Tablet"|"62760"|"Acute Pharyngitis"|"3"|"0.111111"  
"130917"|"Fexofenadine HCl 180 MG Oral Tablet"|"69942"|"Allergic Urticaria"|"4"|"0.666667"  
"130917"|"Fexofenadine HCl 180 MG Oral Tablet"|"77891"|"Acute Upper Respiratory Infection"|"34"|"0.208589"  
"130917"|"Fexofenadine HCl 180 MG Oral Tablet"|"87011"|"Drip Or Drainage Down Throat From Above"|"6"|"0.4"  
"130917"|"Fexofenadine HCl 180 MG Oral Tablet"|"87543"|"Chronic Cough"|"2"|"0.2"  
"130917"|"Fexofenadine HCl 180 MG Oral Tablet"|"88375"|"Skin: A Rash"|"3"|"0.2"  
"130917"|"Fexofenadine HCl 180 MG Oral Tablet"|"93702"|"Allergies"|"8"|"0.16"  
"130917"|"Fexofenadine HCl 180 MG Oral Tablet"|"258010"|"Allergic Reaction"|"2"|"0.2"  
"130917"|"Fexofenadine HCl 180 MG Oral Tablet"|"292640"|"Rhinosinusitis"|"2"|"1"  
"130921"|"Lyrica 50 MG Oral Capsule"|"61070"|"Tingling (Paresthesia)"|"2"|"0.4"  
"130921"|"Lyrica 50 MG Oral Capsule"|"69424"|"Diabetic Peripheral Neuropathy"|"8"|"0.571429"  
"130921"|"Lyrica 50 MG Oral Capsule"|"70568"|"Fibrositis"|"2"|"1"  
"130921"|"Lyrica 50 MG Oral Capsule"|"75601"|"Polyneuropathy"|"7"|"0.5"

"130921"|"Lyrica 50 MG Oral Capsule"|"75717"|"Cervicalgia"|"2"|"0.333333"  
"130921"|"Lyrica 50 MG Oral Capsule"|"75728"|"Sciatica"|"2"|"0.285714"  
"130921"|"Lyrica 50 MG Oral Capsule"|"75812"|"Myalgia And Myositis"|"3"|"0.25"  
"130921"|"Lyrica 50 MG Oral Capsule"|"76794"|"Herpes Zoster (Shingles)"|"5"|"0.833333"  
"130921"|"Lyrica 50 MG Oral Capsule"|"91089"|"Lower Back Pain"|"4"|"0.142857"  
"130921"|"Lyrica 50 MG Oral Capsule"|"173419"|"Cervical Radiculopathy"|"3"|"0.5"  
"130921"|"Lyrica 50 MG Oral Capsule"|"173442"|"Lumbar Radiculopathy"|"5"|"0.555556"  
"130921"|"Lyrica 50 MG Oral Capsule"|"251467"|"Limb Pain"|"5"|"0.357143"  
"130921"|"Lyrica 50 MG Oral Capsule"|"252625"|"Diabetic Polyneuropathy"|"2"|"0.4"  
"130921"|"Lyrica 50 MG Oral Capsule"|"278812"|"Prostate Cancer"|"2"|"0.2"  
"130921"|"Lyrica 50 MG Oral Capsule"|"288933"|"Peripheral Neuropathy"|"10"|"0.37037"  
"130921"|"Lyrica 50 MG Oral Capsule"|"288977"|"Fibromyalgia"|"9"|"0.375"  
"130948"|"Glimepiride 2 MG Oral Tablet"|"65712"|"Diabetic Nephropathy Type II - Uncontrolled"|"2"|"1"  
"130948"|"Glimepiride 2 MG Oral Tablet"|"69380"|"Diabetes Mellitus"|"23"|"0.333333"  
"130948"|"Glimepiride 2 MG Oral Tablet"|"69381"|"Type II Diabetes Mellitus"|"16"|"0.432432"  
"130948"|"Glimepiride 2 MG Oral Tablet"|"69382"|"Type II Diabetes Mellitus - Uncomplicated, Uncontrolled"|"2"|"0.333333"  
"130948"|"Glimepiride 2 MG Oral Tablet"|"69401"|"Diabetes Mellitus Under Control"|"2"|"0.5"  
"130948"|"Glimepiride 2 MG Oral Tablet"|"69402"|"Diabetes Mellitus Poorly Controlled"|"7"|"0.466667"  
"130954"|"Lyrica 150 MG Oral Capsule"|"69402"|"Diabetes Mellitus Poorly Controlled"|"2"|"0.25"  
"130954"|"Lyrica 150 MG Oral Capsule"|"69425"|"Diabetic Peripheral Neuropathy Type II"|"2"|"1"  
"130954"|"Lyrica 150 MG Oral Capsule"|"73666"|"Backache"|"2"|"0.285714"  
"130954"|"Lyrica 150 MG Oral Capsule"|"74988"|"Seizure Disorder"|"2"|"0.25"  
"130954"|"Lyrica 150 MG Oral Capsule"|"75002"|"Partial Complex Psychomotor Seizure With Intractable Seizure"|"4"|"0.666667"  
"130954"|"Lyrica 150 MG Oral Capsule"|"91089"|"Lower Back Pain"|"2"|"0.285714"  
"130954"|"Lyrica 150 MG Oral Capsule"|"288921"|"Chronic Pain"|"3"|"0.428571"  
"130954"|"Lyrica 150 MG Oral Capsule"|"288933"|"Peripheral Neuropathy"|"5"|"0.5"  
"130954"|"Lyrica 150 MG Oral Capsule"|"288977"|"Fibromyalgia"|"4"|"0.5"  
"131072"|"Glimepiride 1 MG Oral Tablet"|"69380"|"Diabetes Mellitus"|"12"|"0.285714"  
"131072"|"Glimepiride 1 MG Oral Tablet"|"69381"|"Type II Diabetes Mellitus"|"7"|"0.318182"  
"131072"|"Glimepiride 1 MG Oral Tablet"|"69401"|"Diabetes Mellitus Under Control"|"3"|"0.75"  
"131072"|"Glimepiride 1 MG Oral Tablet"|"69402"|"Diabetes Mellitus Poorly Controlled"|"9"|"0.5625"  
"131074"|"Actoplus Met 15-850 MG Oral Tablet"|"69380"|"Diabetes Mellitus"|"6"|"0.26087"  
"131074"|"Actoplus Met 15-850 MG Oral Tablet"|"69381"|"Type II Diabetes Mellitus"|"5"|"0.357143"  
"131074"|"Actoplus Met 15-850 MG Oral Tablet"|"69402"|"Diabetes Mellitus Poorly Controlled"|"4"|"0.4"  
"131087"|"Ambien CR 12.5 MG Oral Tablet Extended Release"|"61108"|"Insomnia"|"31"|"0.553571"  
"131087"|"Ambien CR 12.5 MG Oral Tablet Extended Release"|"76357"|"Major Depression, Recurrent"|"2"|"0.333333"  
"131087"|"Ambien CR 12.5 MG Oral Tablet Extended Release"|"173463"|"Insomnia Due To Stress"|"2"|"0.666667"  
"131087"|"Ambien CR 12.5 MG Oral Tablet Extended Release"|"275541"|"Adjustment Insomnia"|"2"|"1"  
"131091"|"Ambien CR 6.25 MG Oral Tablet Extended Release"|"61108"|"Insomnia"|"23"|"0.560976"  
"131124"|"Cephalexin 500 MG Oral Tablet"|"69999"|"Cellulitis"|"4"|"0.5"  
"131133"|"Twinject 0.15 MG/0.15ML Injection Device"|"258010"|"Allergic Reaction"|"2"|"1"  
"131153"|"Cephalexin 250 MG Oral Tablet"|"70016"|"Cellulitis Of The Leg"|"2"|"1"  
"131192"|"Leflunomide 10 MG Oral Tablet"|"70455"|"Rheumatoid Arthritis"|"16"|"0.842105"  
"131192"|"Leflunomide 10 MG Oral Tablet"|"70472"|"Systemic Lupus Erythematosus"|"2"|"0.5"  
"131192"|"Leflunomide 10 MG Oral Tablet"|"70704"|"Symmetric Polyarticular Inflammation"|"2"|"1"  
"131202"|"Lyrica 200 MG Oral Capsule"|"75002"|"Partial Complex Psychomotor Seizure With Intractable Seizure"|"5"|"0.714286"  
"131202"|"Lyrica 200 MG Oral Capsule"|"252566"|"Partial Complex Seizure"|"2"|"1"  
"131216"|"Fortical 200 UNIT/ACT Nasal Solution"|"69341"|"Osteoporosis"|"2"|"0.5"  
"131226"|"Actoplus Met 15-500 MG Oral Tablet"|"69380"|"Diabetes Mellitus"|"3"|"0.2"  
"131226"|"Actoplus Met 15-500 MG Oral Tablet"|"69381"|"Type II Diabetes Mellitus"|"3"|"0.375"

"131226"|"Actoplus Met 15-500 MG Oral Tablet"|"69382"|"Type II Diabetes Mellitus - Uncomplicated, Uncontrolled"|"2"|"0.666667"

"131245"|"Rozerem 8 MG Oral Tablet"|"61108"|"Insomnia"|"5"|"0.454545"

"131245"|"Rozerem 8 MG Oral Tablet"|"75080"|"Parkinson's Disease"|"4"|"0.5"

"131282"|"Glimepiride 4 MG Oral Tablet"|"69380"|"Diabetes Mellitus"|"19"|"0.2375"

"131282"|"Glimepiride 4 MG Oral Tablet"|"69381"|"Type II Diabetes Mellitus"|"23"|"0.489362"

"131282"|"Glimepiride 4 MG Oral Tablet"|"69382"|"Type II Diabetes Mellitus - Uncomplicated, Uncontrolled"|"2"|"0.2"

"131282"|"Glimepiride 4 MG Oral Tablet"|"69401"|"Diabetes Mellitus Under Control"|"3"|"0.428571"

"131282"|"Glimepiride 4 MG Oral Tablet"|"69402"|"Diabetes Mellitus Poorly Controlled"|"21"|"0.538462"

"131302"|"Zidovudine 300 MG Oral Tablet"|"76842"|"Acquired Immunodeficiency Syndrome (AIDS)"|"2"|"0.5"

"131311"|"Naltrexone Powder"|"75125"|"Multiple Sclerosis"|"5"|"0.625"

"131329"|"Lyrica 25 MG Oral Capsule"|"75125"|"Multiple Sclerosis"|"4"|"0.4"

"131329"|"Lyrica 25 MG Oral Capsule"|"288933"|"Peripheral Neuropathy"|"5"|"0.384615"

"131337"|"Cephalexin 250 MG/5ML Oral Suspension Reconstituted"|"70060"|"Impetigo"|"2"|"0.4"

"131342"|"Hydrocortisone Butyrate 0.1 % External Cream"|"278350"|"Eczema"|"4"|"1"

"131361"|"Lyrica 300 MG Oral Capsule"|"75002"|"Partial Complex Psychomotor Seizure With Intractable Seizure"|"4"|"0.8"

"131367"|"Fexofenadine HCl 60 MG Oral Tablet"|"62585"|"Chronic Sinusitis"|"2"|"0.4"

"131367"|"Fexofenadine HCl 60 MG Oral Tablet"|"62598"|"Allergic Rhinitis"|"63"|"0.807692"

"131367"|"Fexofenadine HCl 60 MG Oral Tablet"|"77891"|"Acute Upper Respiratory Infection"|"5"|"0.2"

"131367"|"Fexofenadine HCl 60 MG Oral Tablet"|"93702"|"Allergies"|"4"|"0.444444"

"131367"|"Fexofenadine HCl 60 MG Oral Tablet"|"289113"|"Acute Rhinitis"|"2"|"1"

"131375"|"Lyrica 75 MG Oral Capsule"|"60832"|"Facial Pain"|"2"|"0.5"

"131375"|"Lyrica 75 MG Oral Capsule"|"69424"|"Diabetic Peripheral Neuropathy"|"4"|"0.307692"

"131375"|"Lyrica 75 MG Oral Capsule"|"69425"|"Diabetic Peripheral Neuropathy Type II"|"3"|"0.75"

"131375"|"Lyrica 75 MG Oral Capsule"|"70472"|"Systemic Lupus Erythematosus"|"4"|"0.363636"

"131375"|"Lyrica 75 MG Oral Capsule"|"70478"|"Sjogren's Syndrome"|"2"|"0.4"

"131375"|"Lyrica 75 MG Oral Capsule"|"73666"|"Backache"|"3"|"0.115385"

"131375"|"Lyrica 75 MG Oral Capsule"|"74990"|"Convulsive Grand Mal Seizure With Intractable Seizure"|"2"|"0.666667"

"131375"|"Lyrica 75 MG Oral Capsule"|"75002"|"Partial Complex Psychomotor Seizure With Intractable Seizure"|"6"|"0.857143"

"131375"|"Lyrica 75 MG Oral Capsule"|"75601"|"Polyneuropathy"|"2"|"0.285714"

"131375"|"Lyrica 75 MG Oral Capsule"|"85638"|"Ankle Joint Pain"|"5"|"0.714286"

"131375"|"Lyrica 75 MG Oral Capsule"|"91089"|"Lower Back Pain"|"5"|"0.25"

"131375"|"Lyrica 75 MG Oral Capsule"|"173418"|"Radiculopathy"|"3"|"1"

"131375"|"Lyrica 75 MG Oral Capsule"|"173419"|"Cervical Radiculopathy"|"2"|"0.666667"

"131375"|"Lyrica 75 MG Oral Capsule"|"173442"|"Lumbar Radiculopathy"|"2"|"0.25"

"131375"|"Lyrica 75 MG Oral Capsule"|"288921"|"Chronic Pain"|"3"|"0.25"

"131375"|"Lyrica 75 MG Oral Capsule"|"288933"|"Peripheral Neuropathy"|"20"|"0.540541"

"131375"|"Lyrica 75 MG Oral Capsule"|"288977"|"Fibromyalgia"|"16"|"0.5"

"132072"|"Kaletra 200-50 MG Oral Tablet"|"76835"|"HIV Infection"|"42"|"0.75"

"132072"|"Kaletra 200-50 MG Oral Tablet"|"76842"|"Acquired Immunodeficiency Syndrome (AIDS)"|"16"|"0.551724"

"132141"|"Zidovudine 50 MG/5ML Oral Syrup"|"76835"|"HIV Infection"|"11"|"0.733333"

"132141"|"Zidovudine 50 MG/5ML Oral Syrup"|"94386"|"Exposed To HIV Infection"|"9"|"0.5625"

"132395"|"Vitamax 60 MG Oral Tablet Chewable"|"67695"|"Cystic Fibrosis"|"2"|"1"

"132407"|"GliPiZIDE-MetFORMIN HCl 5-500 MG Oral Tablet"|"69402"|"Diabetes Mellitus Poorly Controlled"|"3"|"0.75"

"132476"|"Fish Oil OIL"|"67970"|"Hyperlipidemia"|"5"|"0.185185"

"132476"|"Fish Oil OIL"|"283292"|"Essential Hypercholesterolemia"|"2"|"0.666667"

"132482"|"Mucinex D 60-600 MG Oral Tablet Extended Release 12 Hour"|"64118"|"Acute Bronchitis"|"2"|"1"

"132850"|"Azithromycin 250 MG Oral Tablet"|"60862"|"Feeling Congested In The Chest"|"2"|"0.285714"

"132850"|"Azithromycin 250 MG Oral Tablet"|"60869"|"Cough"|"88"|"0.258065"

"132850"|"Azithromycin 250 MG Oral Tablet"|"62344"|"Acute Suppurative Otitis Media"|"2"|"1"  
"132850"|"Azithromycin 250 MG Oral Tablet"|"62352"|"Acute Serous Otitis Media Of The Right Ear"|"2"|"1"  
"132850"|"Azithromycin 250 MG Oral Tablet"|"62577"|"Sinusitis"|"32"|"0.363636"  
"132850"|"Azithromycin 250 MG Oral Tablet"|"62578"|"Acute Sinusitis"|"80"|"0.368664"  
"132850"|"Azithromycin 250 MG Oral Tablet"|"62579"|"Acute Suppurative Sinusitis"|"2"|"0.5"  
"132850"|"Azithromycin 250 MG Oral Tablet"|"62580"|"Acute Maxillary Sinusitis"|"12"|"0.324324"  
"132850"|"Azithromycin 250 MG Oral Tablet"|"62581"|"Acute Frontal Sinusitis"|"4"|"0.444444"  
"132850"|"Azithromycin 250 MG Oral Tablet"|"62585"|"Chronic Sinusitis"|"9"|"0.225"  
"132850"|"Azithromycin 250 MG Oral Tablet"|"62586"|"Chronic Maxillary Sinusitis"|"3"|"0.15"  
"132850"|"Azithromycin 250 MG Oral Tablet"|"62598"|"Allergic Rhinitis"|"24"|"0.0501044"  
"132850"|"Azithromycin 250 MG Oral Tablet"|"62599"|"Allergic Rhinitis Due To Pollen"|"2"|"0.222222"  
"132850"|"Azithromycin 250 MG Oral Tablet"|"62700"|"Acute Laryngitis"|"4"|"0.285714"  
"132850"|"Azithromycin 250 MG Oral Tablet"|"62759"|"Pharyngitis"|"7"|"0.132075"  
"132850"|"Azithromycin 250 MG Oral Tablet"|"62760"|"Acute Pharyngitis"|"36"|"0.375"  
"132850"|"Azithromycin 250 MG Oral Tablet"|"62761"|"Group A Streptococcus: B Hemolytic Pharyngitis"|"2"|"0.25"  
"132850"|"Azithromycin 250 MG Oral Tablet"|"64118"|"Acute Bronchitis"|"216"|"0.648649"  
"132850"|"Azithromycin 250 MG Oral Tablet"|"64126"|"Pneumonia"|"11"|"0.13253"  
"132850"|"Azithromycin 250 MG Oral Tablet"|"64155"|"Primary Atypical Mycoplasma Pneumoniae"|"4"|"0.8"  
"132850"|"Azithromycin 250 MG Oral Tablet"|"64181"|"Asthma"|"19"|"0.0608974"  
"132850"|"Azithromycin 250 MG Oral Tablet"|"64205"|"Chronic Obstructive Pulmonary Disease"|"11"|"0.13253"  
"132850"|"Azithromycin 250 MG Oral Tablet"|"64206"|"Chronic Bronchitis"|"11"|"0.578947"  
"132850"|"Azithromycin 250 MG Oral Tablet"|"64207"|"Chronic Bronchitis With Acute Exacerbation"|"3"|"0.3"  
"132850"|"Azithromycin 250 MG Oral Tablet"|"64210"|"Diffuse Obstructive Chronic Bronchitis"|"4"|"0.571429"  
"132850"|"Azithromycin 250 MG Oral Tablet"|"65848"|"Chlamydia Trachomatis Urethritis"|"5"|"0.833333"  
"132850"|"Azithromycin 250 MG Oral Tablet"|"66182"|"Cervicitis Chlamydia Trachomatis"|"2"|"0.4"  
"132850"|"Azithromycin 250 MG Oral Tablet"|"67695"|"Cystic Fibrosis"|"3"|"0.125"  
"132850"|"Azithromycin 250 MG Oral Tablet"|"76934"|"Chlamydial Infections"|"5"|"0.714286"  
"132850"|"Azithromycin 250 MG Oral Tablet"|"77650"|"Atypical Mycobacterial Infection"|"3"|"1"  
"132850"|"Azithromycin 250 MG Oral Tablet"|"77890"|"Upper Respiratory Infection"|"100"|"0.4"  
"132850"|"Azithromycin 250 MG Oral Tablet"|"77891"|"Acute Upper Respiratory Infection"|"200"|"0.464037"  
"132850"|"Azithromycin 250 MG Oral Tablet"|"77894"|"Venereal Disease Due To Chlamydia Trachomatis"|"2"|"0.666667"  
"132850"|"Azithromycin 250 MG Oral Tablet"|"77896"|"Lower Genitourinary Venereal Disease Due To Chlamydia Trachomatis"|"2"|"0.666667"  
"132850"|"Azithromycin 250 MG Oral Tablet"|"77898"|"Chlamydial Disease"|"3"|"0.5"  
"132850"|"Azithromycin 250 MG Oral Tablet"|"87419"|"Chest Tightness Or Heavy Pressure"|"2"|"0.666667"  
"132850"|"Azithromycin 250 MG Oral Tablet"|"87543"|"Chronic Cough"|"3"|"0.230769"  
"132850"|"Azithromycin 250 MG Oral Tablet"|"87587"|"Coughing Up Sputum Yellow"|"7"|"0.7"  
"132850"|"Azithromycin 250 MG Oral Tablet"|"94408"|"Exposed To Venereal Disease"|"3"|"0.130435"  
"132850"|"Azithromycin 250 MG Oral Tablet"|"166743"|"Community-acquired Pneumonia"|"6"|"0.545455"  
"132850"|"Azithromycin 250 MG Oral Tablet"|"166748"|"Asthma With Acute Exacerbation"|"4"|"0.166667"  
"132850"|"Azithromycin 250 MG Oral Tablet"|"251528"|"Acute Otitis Media"|"4"|"0.166667"  
"132850"|"Azithromycin 250 MG Oral Tablet"|"251575"|"Streptococcal Sore Throat"|"5"|"0.416667"  
"132850"|"Azithromycin 250 MG Oral Tablet"|"258835"|"Bronchitis"|"63"|"0.477273"  
"132850"|"Azithromycin 250 MG Oral Tablet"|"274511"|"Travel Sickness"|"2"|"0.5"  
"132850"|"Azithromycin 250 MG Oral Tablet"|"277872"|"Asthmatic Bronchitis"|"7"|"0.777778"  
"132850"|"Azithromycin 250 MG Oral Tablet"|"277913"|"Chronic Interstitial Lung Disease"|"3"|"0.428571"  
"132850"|"Azithromycin 250 MG Oral Tablet"|"277914"|"Acute Bronchitis With Bronchospasm"|"12"|"0.6"  
"132850"|"Azithromycin 250 MG Oral Tablet"|"277984"|"Allergic Bronchitis"|"3"|"0.6"  
"132850"|"Azithromycin 250 MG Oral Tablet"|"282272"|"Anterior Wall Chest Pain With Respiration"|"3"|"0.176471"  
"132850"|"Azithromycin 250 MG Oral Tablet"|"292640"|"Rhinosinusitis"|"3"|"0.428571"  
"132850"|"Azithromycin 250 MG Oral Tablet"|"296447"|"Preventive Medicine Counseling About Travel"|"2"|"0.666667"  
"132850"|"Azithromycin 250 MG Oral Tablet"|"297031"|"Intermittent Asthma"|"3"|"0.25"

"132851"|"Azithromycin 500 MG Oral Tablet"|"60869"|"Cough"|"10"|"0.181818"  
"132851"|"Azithromycin 500 MG Oral Tablet"|"60928"|"Pain During Urination (Dysuria)"|"2"|"0.2"  
"132851"|"Azithromycin 500 MG Oral Tablet"|"60953"|"Penile Discharge"|"6"|"0.857143"  
"132851"|"Azithromycin 500 MG Oral Tablet"|"62577"|"Sinusitis"|"5"|"0.5"  
"132851"|"Azithromycin 500 MG Oral Tablet"|"62578"|"Acute Sinusitis"|"34"|"0.641509"  
"132851"|"Azithromycin 500 MG Oral Tablet"|"62580"|"Acute Maxillary Sinusitis"|"4"|"0.8"  
"132851"|"Azithromycin 500 MG Oral Tablet"|"62588"|"Chronic Ethmoidal Sinusitis"|"3"|"0.6"  
"132851"|"Azithromycin 500 MG Oral Tablet"|"62760"|"Acute Pharyngitis"|"14"|"0.636364"  
"132851"|"Azithromycin 500 MG Oral Tablet"|"64118"|"Acute Bronchitis"|"26"|"0.634146"  
"132851"|"Azithromycin 500 MG Oral Tablet"|"64205"|"Chronic Obstructive Pulmonary Disease"|"8"|"0.4"  
"132851"|"Azithromycin 500 MG Oral Tablet"|"64223"|"Bronchiectasis"|"4"|"0.444444"  
"132851"|"Azithromycin 500 MG Oral Tablet"|"65848"|"Chlamydia Trachomatis Urethritis"|"16"|"0.888889"  
"132851"|"Azithromycin 500 MG Oral Tablet"|"66182"|"Cervicitis Chlamydia Trachomatis"|"13"|"0.722222"  
"132851"|"Azithromycin 500 MG Oral Tablet"|"76702"|"Viral Infection"|"2"|"0.333333"  
"132851"|"Azithromycin 500 MG Oral Tablet"|"76934"|"Chlamydial Infections"|"25"|"0.862069"  
"132851"|"Azithromycin 500 MG Oral Tablet"|"77650"|"Atypical Mycobacterial Infection"|"2"|"0.5"  
"132851"|"Azithromycin 500 MG Oral Tablet"|"77890"|"Upper Respiratory Infection"|"6"|"0.352941"  
"132851"|"Azithromycin 500 MG Oral Tablet"|"77891"|"Acute Upper Respiratory Infection"|"25"|"0.490196"  
"132851"|"Azithromycin 500 MG Oral Tablet"|"77894"|"Venereal Disease Due To Chlamydia Trachomatis"|"7"|"0.7"  
"132851"|"Azithromycin 500 MG Oral Tablet"|"77896"|"Lower Genitourinary Venereal Disease Due To Chlamydia Trachomatis"|"18"|"0.947368"  
"132851"|"Azithromycin 500 MG Oral Tablet"|"77898"|"Chlamydial Disease"|"74"|"0.961039"  
"132851"|"Azithromycin 500 MG Oral Tablet"|"94408"|"Exposed To Venereal Disease"|"4"|"0.444444"  
"132851"|"Azithromycin 500 MG Oral Tablet"|"251528"|"Acute Otitis Media"|"4"|"0.571429"  
"132851"|"Azithromycin 500 MG Oral Tablet"|"251575"|"Streptococcal Sore Throat"|"3"|"0.428571"  
"132851"|"Azithromycin 500 MG Oral Tablet"|"252344"|"Sexually Active High-risk"|"2"|"0.666667"  
"132851"|"Azithromycin 500 MG Oral Tablet"|"274516"|"Acute Pharyngitis Streptococcus"|"2"|"0.5"  
"132858"|"Azithromycin 600 MG Oral Tablet"|"76835"|"HIV Infection"|"14"|"0.482759"  
"132858"|"Azithromycin 600 MG Oral Tablet"|"76842"|"Acquired Immunodeficiency Syndrome (AIDS)"|"11"|"0.733333"  
"132895"|"Est Estrogens-Methyltest HS 0.625-1.25 MG Oral Tablet"|"66073"|"Menopause"|"2"|"0.666667"  
"132896"|"Digoxin 0.05 MG/ML Oral Solution"|"63217"|"Congestive Heart Failure"|"2"|"0.666667"  
"132896"|"Digoxin 0.05 MG/ML Oral Solution"|"63496"|"Tetralogy Of Fallot"|"2"|"0.666667"  
"132896"|"Digoxin 0.05 MG/ML Oral Solution"|"63516"|"Tricuspid Atresia"|"2"|"1"  
"132896"|"Digoxin 0.05 MG/ML Oral Solution"|"63526"|"Hypoplastic Left Heart Syndrome"|"3"|"0.6"  
"132919"|"Ceron 4-12.5 MG/5ML Oral Syrup"|"60869"|"Cough"|"2"|"1"  
"132959"|"Ceron 1-3.5 MG/ML LIQD"|"77891"|"Acute Upper Respiratory Infection"|"2"|"1"  
"132973"|"Doxycycline Monohydrate 100 MG Oral Tablet"|"65762"|"Urinary Tract Infection"|"2"|"0.5"  
"132973"|"Doxycycline Monohydrate 100 MG Oral Tablet"|"70016"|"Cellulitis Of The Leg"|"2"|"1"  
"132982"|"Ceron-DM 12.5-4-15 MG/5ML Oral Syrup"|"60869"|"Cough"|"2"|"0.666667"  
"132982"|"Ceron-DM 12.5-4-15 MG/5ML Oral Syrup"|"62578"|"Acute Sinusitis"|"3"|"0.75"  
"132982"|"Ceron-DM 12.5-4-15 MG/5ML Oral Syrup"|"77891"|"Acute Upper Respiratory Infection"|"3"|"0.75"  
"132991"|"Xopenex HFA 45 MCG/ACT Inhalation Aerosol"|"32925"|"Chronic Respiratory Failure"|"8"|"0.571429"  
"132991"|"Xopenex HFA 45 MCG/ACT Inhalation Aerosol"|"60863"|"Difficulty Breathing (Dyspnea)"|"4"|"0.166667"  
"132991"|"Xopenex HFA 45 MCG/ACT Inhalation Aerosol"|"60869"|"Cough"|"29"|"0.268519"  
"132991"|"Xopenex HFA 45 MCG/ACT Inhalation Aerosol"|"60874"|"Wheezing"|"43"|"0.309353"  
"132991"|"Xopenex HFA 45 MCG/ACT Inhalation Aerosol"|"62598"|"Allergic Rhinitis"|"32"|"0.0691145"  
"132991"|"Xopenex HFA 45 MCG/ACT Inhalation Aerosol"|"63484"|"Pulmonary Hypertension"|"5"|"0.135135"  
"132991"|"Xopenex HFA 45 MCG/ACT Inhalation Aerosol"|"64118"|"Acute Bronchitis"|"17"|"0.333333"  
"132991"|"Xopenex HFA 45 MCG/ACT Inhalation Aerosol"|"64180"|"Reactive Airway Disease"|"66"|"0.404908"  
"132991"|"Xopenex HFA 45 MCG/ACT Inhalation Aerosol"|"64181"|"Asthma"|"387"|"0.510554"  
"132991"|"Xopenex HFA 45 MCG/ACT Inhalation Aerosol"|"64182"|"Mild Intermittent Asthma"|"11"|"0.207547"  
"132991"|"Xopenex HFA 45 MCG/ACT Inhalation Aerosol"|"64183"|"Mild Persistent Asthma"|"10"|"0.263158"  
"132991"|"Xopenex HFA 45 MCG/ACT Inhalation Aerosol"|"64184"|"Moderate Persistent Asthma"|"8"|"0.242424"

"132991"|"Xopenex HFA 45 MCG/ACT Inhalation Aerosol"|"64190"|"Exercise-induced Asthma"|"10"|"0.322581"  
"132991"|"Xopenex HFA 45 MCG/ACT Inhalation Aerosol"|"64202"|"Bronchiolitis"|"29"|"0.322222"  
"132991"|"Xopenex HFA 45 MCG/ACT Inhalation Aerosol"|"64205"|"Chronic Obstructive Pulmonary  
Disease"|"15"|"0.375"  
"132991"|"Xopenex HFA 45 MCG/ACT Inhalation Aerosol"|"64212"|"Emphysema"|"3"|"0.428571"  
"132991"|"Xopenex HFA 45 MCG/ACT Inhalation Aerosol"|"64223"|"Bronchiectasis"|"3"|"0.3"  
"132991"|"Xopenex HFA 45 MCG/ACT Inhalation Aerosol"|"64294"|"Pulmonary Fibrosis"|"2"|"0.285714"  
"132991"|"Xopenex HFA 45 MCG/ACT Inhalation Aerosol"|"67885"|"Bronchopulmonary Dysplasia Of Fetus Or  
Newborn"|"5"|"0.128205"  
"132991"|"Xopenex HFA 45 MCG/ACT Inhalation Aerosol"|"77891"|"Acute Upper Respiratory  
Infection"|"14"|"0.0603448"  
"132991"|"Xopenex HFA 45 MCG/ACT Inhalation Aerosol"|"166748"|"Asthma With Acute  
Exacerbation"|"17"|"0.242857"  
"132991"|"Xopenex HFA 45 MCG/ACT Inhalation Aerosol"|"257912"|"Disorder Of Mitochondrial  
Metabolism"|"5"|"0.416667"  
"132991"|"Xopenex HFA 45 MCG/ACT Inhalation Aerosol"|"258832"|"Cough Variant Asthma"|"13"|"0.433333"  
"132991"|"Xopenex HFA 45 MCG/ACT Inhalation Aerosol"|"277872"|"Asthmatic Bronchitis"|"2"|"0.5"  
"132991"|"Xopenex HFA 45 MCG/ACT Inhalation Aerosol"|"277881"|"Childhood Asthma"|"5"|"0.3125"  
"132991"|"Xopenex HFA 45 MCG/ACT Inhalation Aerosol"|"277913"|"Chronic Interstitial Lung  
Disease"|"3"|"0.272727"  
"132991"|"Xopenex HFA 45 MCG/ACT Inhalation Aerosol"|"297031"|"Intermittent Asthma"|"7"|"0.538462"  
"133147"|"Zonisamide 100 MG Oral Capsule"|"74988"|"Seizure Disorder"|"6"|"0.2"  
"133147"|"Zonisamide 100 MG Oral Capsule"|"74990"|"Convulsive Grand Mal Seizure With Intractable  
Seizure"|"3"|"1"  
"133147"|"Zonisamide 100 MG Oral Capsule"|"75001"|"Partial Complex Psychomotor Seizure"|"4"|"1"  
"133147"|"Zonisamide 100 MG Oral Capsule"|"75002"|"Partial Complex Psychomotor Seizure With Intractable  
Seizure"|"20"|"0.740741"  
"133147"|"Zonisamide 100 MG Oral Capsule"|"252546"|"Generalized Convulsive Seizure"|"3"|"0.333333"  
"133147"|"Zonisamide 100 MG Oral Capsule"|"252551"|"Generalized Convulsive Tonic-clonic  
Seizure"|"2"|"0.666667"  
"133147"|"Zonisamide 100 MG Oral Capsule"|"252552"|"Generalized Convulsive Tonic-clonic Seizure With  
Intractable Seizure"|"3"|"0.6"  
"133147"|"Zonisamide 100 MG Oral Capsule"|"252566"|"Partial Complex Seizure"|"8"|"0.727273"  
"133147"|"Zonisamide 100 MG Oral Capsule"|"252570"|"Partial Complex Seizure With Secondary Generalization  
With Intractable Seizure"|"8"|"0.615385"  
"133147"|"Zonisamide 100 MG Oral Capsule"|"289879"|"Generalized Convulsive Myoclonic Seizure, Juvenile With  
Intractable Seizure"|"4"|"0.8"  
"133147"|"Zonisamide 100 MG Oral Capsule"|"297231"|"Epilepsy"|"2"|"0.222222"  
"133150"|"Amoxicillin-Pot Clavulanate 250-125 MG Oral Tablet"|"274533"|"Sore Throat"|"2"|"1"  
"133154"|"Quinapril-Hydrochlorothiazide 20-25 MG Oral Tablet"|"63468"|"Essential Hypertension"|"2"|"1"  
"133154"|"Quinapril-Hydrochlorothiazide 20-25 MG Oral Tablet"|"63470"|"Benign Essential Hypertension"|"3"|"1"  
"133169"|"Cabergoline 0.5 MG Oral Tablet"|"69200"|"Pituitary Prolactinoma"|"7"|"0.636364"  
"133169"|"Cabergoline 0.5 MG Oral Tablet"|"69201"|"Prolactinoma Microadenoma"|"6"|"0.545455"  
"133169"|"Cabergoline 0.5 MG Oral Tablet"|"278177"|"Hyperprolactinemia"|"12"|"0.6"  
"133170"|"Cyclobenzaprine HCl 5 MG Oral Tablet"|"31947"|"Lumbago"|"6"|"0.285714"  
"133170"|"Cyclobenzaprine HCl 5 MG Oral Tablet"|"60828"|"Headache"|"12"|"0.25"  
"133170"|"Cyclobenzaprine HCl 5 MG Oral Tablet"|"70146"|"Osteoarthritis"|"8"|"0.228571"  
"133170"|"Cyclobenzaprine HCl 5 MG Oral Tablet"|"70455"|"Rheumatoid Arthritis"|"16"|"0.470588"  
"133170"|"Cyclobenzaprine HCl 5 MG Oral Tablet"|"70472"|"Systemic Lupus Erythematosus"|"7"|"0.304348"  
"133170"|"Cyclobenzaprine HCl 5 MG Oral Tablet"|"70475"|"Scleroderma"|"2"|"0.5"  
"133170"|"Cyclobenzaprine HCl 5 MG Oral Tablet"|"70640"|"Wegener's Granulomatosis"|"2"|"1"  
"133170"|"Cyclobenzaprine HCl 5 MG Oral Tablet"|"70704"|"Symmetric Polyarticular Inflammation"|"2"|"0.666667"  
"133170"|"Cyclobenzaprine HCl 5 MG Oral Tablet"|"70706"|"Ankylosing Spondylitis"|"7"|"0.636364"  
"133170"|"Cyclobenzaprine HCl 5 MG Oral Tablet"|"70719"|"Psoriatic Arthropathy"|"2"|"0.285714"

"133170"|"Cyclobenzaprine HCl 5 MG Oral Tablet"|"73454"|"Lumbar Sprain"|"2"|"0.5"  
"133170"|"Cyclobenzaprine HCl 5 MG Oral Tablet"|"73551"|"Tendonitis"|"3"|"0.6"  
"133170"|"Cyclobenzaprine HCl 5 MG Oral Tablet"|"73666"|"Backache"|"17"|"0.261538"  
"133170"|"Cyclobenzaprine HCl 5 MG Oral Tablet"|"74530"|"Tension-type Headache"|"4"|"0.266667"  
"133170"|"Cyclobenzaprine HCl 5 MG Oral Tablet"|"75579"|"Spondylosis Without Myelopathy"|"2"|"0.666667"  
"133170"|"Cyclobenzaprine HCl 5 MG Oral Tablet"|"75594"|"Spinal Stenosis"|"3"|"0.5"  
"133170"|"Cyclobenzaprine HCl 5 MG Oral Tablet"|"75717"|"Cervicalgia"|"13"|"0.382353"  
"133170"|"Cyclobenzaprine HCl 5 MG Oral Tablet"|"75728"|"Sciatica"|"4"|"0.285714"  
"133170"|"Cyclobenzaprine HCl 5 MG Oral Tablet"|"75811"|"Muscle Spasm"|"33"|"0.578947"  
"133170"|"Cyclobenzaprine HCl 5 MG Oral Tablet"|"75812"|"Myalgia And Myositis"|"16"|"0.571429"  
"133170"|"Cyclobenzaprine HCl 5 MG Oral Tablet"|"85658"|"Diffuse Joint Pains (Arthralgias)"|"2"|"0.4"  
"133170"|"Cyclobenzaprine HCl 5 MG Oral Tablet"|"85691"|"Neck Pain"|"13"|"0.382353"  
"133170"|"Cyclobenzaprine HCl 5 MG Oral Tablet"|"85701"|"Joint Pain, Localized In The Shoulder"|"4"|"0.2"  
"133170"|"Cyclobenzaprine HCl 5 MG Oral Tablet"|"90945"|"Joint Pain, Localized In The Right  
Shoulder"|"2"|"0.222222"  
"133170"|"Cyclobenzaprine HCl 5 MG Oral Tablet"|"91056"|"Upper Back Pain (Between Shoulder Blades)"|"2"|"0.25"  
"133170"|"Cyclobenzaprine HCl 5 MG Oral Tablet"|"91079"|"Midback Pain"|"3"|"0.5"  
"133170"|"Cyclobenzaprine HCl 5 MG Oral Tablet"|"91089"|"Lower Back Pain"|"38"|"0.469136"  
"133170"|"Cyclobenzaprine HCl 5 MG Oral Tablet"|"92456"|"Joint Pain, Localized In More Than One  
Joint"|"4"|"0.444444"  
"133170"|"Cyclobenzaprine HCl 5 MG Oral Tablet"|"115846"|"Back Muscle Spasm"|"20"|"0.740741"  
"133170"|"Cyclobenzaprine HCl 5 MG Oral Tablet"|"172080"|"Neck Strain"|"4"|"0.571429"  
"133170"|"Cyclobenzaprine HCl 5 MG Oral Tablet"|"172086"|"Lumbar Strain"|"5"|"1"  
"133170"|"Cyclobenzaprine HCl 5 MG Oral Tablet"|"173419"|"Cervical Radiculopathy"|"4"|"0.333333"  
"133170"|"Cyclobenzaprine HCl 5 MG Oral Tablet"|"173442"|"Lumbar Radiculopathy"|"3"|"0.3"  
"133170"|"Cyclobenzaprine HCl 5 MG Oral Tablet"|"251467"|"Limb Pain"|"4"|"0.190476"  
"133170"|"Cyclobenzaprine HCl 5 MG Oral Tablet"|"278685"|"Arthralgias In Multiple Sites"|"9"|"0.6"  
"133170"|"Cyclobenzaprine HCl 5 MG Oral Tablet"|"288977"|"Fibromyalgia"|"8"|"0.32"  
"133170"|"Cyclobenzaprine HCl 5 MG Oral Tablet"|"296854"|"Spondyloarthropathy"|"2"|"1"  
"133174"|"Zonisamide 25 MG Oral Capsule"|"75002"|"Partial Complex Psychomotor Seizure With Intractable  
Seizure"|"2"|"1"  
"133211"|"Strattera 100 MG Oral Capsule"|"75818"|"Attention-deficit Hyperactivity Disorder"|"4"|"0.8"  
"133223"|"DermOtic 0.01 % Otic Oil"|"89421"|"Itching Of The Ears"|"2"|"1"  
"133223"|"DermOtic 0.01 % Otic Oil"|"274445"|"Chronic Otitis Externa"|"6"|"0.666667"  
"133226"|"SEROquel 400 MG Oral Tablet"|"76238"|"Paranoid Schizophrenia, Stable"|"2"|"1"  
"133226"|"SEROquel 400 MG Oral Tablet"|"76272"|"Schizoaffective Disorder"|"2"|"0.5"  
"133226"|"SEROquel 400 MG Oral Tablet"|"76276"|"Schizoaffective Disorder - Chronic (With Residual  
Symptoms)"|"2"|"0.666667"  
"133226"|"SEROquel 400 MG Oral Tablet"|"76307"|"Bipolar Disorder"|"3"|"0.375"  
"133226"|"SEROquel 400 MG Oral Tablet"|"76329"|"Bipolar I Disorder, Most Recent Episode, Mixed In Partial  
Remission"|"2"|"1"  
"133226"|"SEROquel 400 MG Oral Tablet"|"76343"|"Bipolar I Disorder, Most Recent Episode, Depressed -  
Moderate"|"2"|"1"  
"133226"|"SEROquel 400 MG Oral Tablet"|"76351"|"Depression"|"2"|"0.25"  
"133226"|"SEROquel 400 MG Oral Tablet"|"76388"|"Bipolar Disorder NOS"|"7"|"0.875"  
"133231"|"Nascobal 500 MCG/0.1ML Nasal Solution"|"257948"|"Vitamin B12 Deficiency"|"2"|"0.5"  
"133243"|"Orencia 250 MG Intravenous Solution Reconstituted"|"70455"|"Rheumatoid Arthritis"|"9"|"0.9"  
"133245"|"Tandem 162-115.2 MG Oral Capsule"|"77962"|"Anemia"|"2"|"0.333333"  
"133253"|"Strattera 80 MG Oral Capsule"|"75819"|"ADHD, Predominantly Inattentive Type"|"4"|"0.571429"  
"133253"|"Strattera 80 MG Oral Capsule"|"275486"|"ADHD, Combined Type"|"3"|"1"  
"133253"|"Strattera 80 MG Oral Capsule"|"275492"|"ADHD, Predominantly Hyperactive - Impulsive"|"2"|"1"  
"133253"|"Strattera 80 MG Oral Capsule"|"291687"|"Attention Deficit Disorder Without Hyperactivity"|"2"|"1"  
"133296"|"Abilify 2 MG Oral Tablet"|"75929"|"Mood Disorder Due To General Medical Condition"|"2"|"1"  
"133296"|"Abilify 2 MG Oral Tablet"|"75930"|"Mood Disorder Of Unknown (Axis III) Etiology"|"2"|"1"

"133296"|"Abilify 2 MG Oral Tablet"|"76212"|"Psychosis"|"5"|"0.555556"  
"133296"|"Abilify 2 MG Oral Tablet"|"76306"|"Episodic Mood Disorders"|"6"|"0.666667"  
"133296"|"Abilify 2 MG Oral Tablet"|"76307"|"Bipolar Disorder"|"4"|"0.4"  
"133296"|"Abilify 2 MG Oral Tablet"|"76348"|"Bipolar II Disorder"|"2"|"0.666667"  
"133296"|"Abilify 2 MG Oral Tablet"|"76351"|"Depression"|"21"|"0.525"  
"133296"|"Abilify 2 MG Oral Tablet"|"76356"|"Major Depression, Single Episode In Remission"|"2"|"1"  
"133296"|"Abilify 2 MG Oral Tablet"|"76357"|"Major Depression, Recurrent"|"10"|"0.833333"  
"133296"|"Abilify 2 MG Oral Tablet"|"76359"|"Major Depression, Recurrent With Melancholia"|"2"|"0.666667"  
"133296"|"Abilify 2 MG Oral Tablet"|"76361"|"Moderate Recurrent Major Depression"|"3"|"0.5"  
"133296"|"Abilify 2 MG Oral Tablet"|"76363"|"Major Depression, Recurrent With Psychotic Features"|"2"|"1"  
"133296"|"Abilify 2 MG Oral Tablet"|"76388"|"Bipolar Disorder NOS"|"10"|"0.769231"  
"133296"|"Abilify 2 MG Oral Tablet"|"76546"|"Obsessive Compulsive Disorder"|"2"|"0.2"  
"133296"|"Abilify 2 MG Oral Tablet"|"275526"|"Severe Recurrent Major Depression Without Psychotic Features"|"2"|"0.4"  
"133296"|"Abilify 2 MG Oral Tablet"|"275540"|"Severe Recurrent Major Depression With Psychotic Features"|"2"|"1"  
"133305"|"CeraVe External Cream"|"62598"|"Allergic Rhinitis"|"4"|"0.444444"  
"133305"|"CeraVe External Cream"|"70112"|"Atopic Dermatitis"|"4"|"0.333333"  
"133305"|"CeraVe External Cream"|"278350"|"Eczema"|"13"|"0.764706"  
"133316"|"Prosed/DS 81.6 MG Oral Tablet"|"60928"|"Pain During Urination (Dysuria)"|"2"|"0.5"  
"133316"|"Prosed/DS 81.6 MG Oral Tablet"|"65762"|"Urinary Tract Infection"|"2"|"0.333333"  
"133323"|"NexAVAR 200 MG Oral Tablet"|"79017"|"Hepatocellular Carcinoma Of The Liver"|"6"|"0.666667"  
"133323"|"NexAVAR 200 MG Oral Tablet"|"80847"|"Renal Cell Carcinoma"|"16"|"0.888889"  
"133323"|"NexAVAR 200 MG Oral Tablet"|"181372"|"Renal Carcinoma"|"6"|"0.75"  
"133323"|"NexAVAR 200 MG Oral Tablet"|"181397"|"Adenoid Squamous Cell Carcinoma Of The Kidney"|"2"|"1"  
"133323"|"NexAVAR 200 MG Oral Tablet"|"260344"|"Liver Cancer"|"2"|"1"  
"133323"|"NexAVAR 200 MG Oral Tablet"|"260898"|"Kidney Cancer"|"9"|"0.692308"  
"133353"|"Ultram ER 300 MG Oral Tablet Extended Release 24 Hour"|"70146"|"Osteoarthritis"|"2"|"0.666667"  
"133357"|"Levemir 100 UNIT/ML Subcutaneous Solution"|"69380"|"Diabetes Mellitus"|"12"|"0.153846"  
"133357"|"Levemir 100 UNIT/ML Subcutaneous Solution"|"69381"|"Type II Diabetes Mellitus"|"6"|"0.193548"  
"133357"|"Levemir 100 UNIT/ML Subcutaneous Solution"|"69388"|"Type I Diabetes Mellitus - Uncontrolled"|"10"|"0.666667"  
"133357"|"Levemir 100 UNIT/ML Subcutaneous Solution"|"69402"|"Diabetes Mellitus Poorly Controlled"|"55"|"0.797101"  
"133362"|"Sutent 12.5 MG Oral Capsule"|"80847"|"Renal Cell Carcinoma"|"10"|"1"  
"133362"|"Sutent 12.5 MG Oral Capsule"|"260898"|"Kidney Cancer"|"2"|"0.4"  
"133390"|"SEROquel 50 MG Oral Tablet"|"61108"|"Insomnia"|"3"|"0.166667"  
"133390"|"SEROquel 50 MG Oral Tablet"|"75020"|"Alzheimer's Disease"|"3"|"0.1875"  
"133390"|"SEROquel 50 MG Oral Tablet"|"75032"|"Vascular Dementia"|"2"|"0.4"  
"133390"|"SEROquel 50 MG Oral Tablet"|"75080"|"Parkinson's Disease"|"3"|"0.2"  
"133390"|"SEROquel 50 MG Oral Tablet"|"75082"|"Parkinson's Disease With Dementia"|"2"|"0.4"  
"133390"|"SEROquel 50 MG Oral Tablet"|"76212"|"Psychosis"|"3"|"0.5"  
"133390"|"SEROquel 50 MG Oral Tablet"|"76213"|"Schizophrenia"|"2"|"1"  
"133390"|"SEROquel 50 MG Oral Tablet"|"76306"|"Episodic Mood Disorders"|"3"|"0.333333"  
"133390"|"SEROquel 50 MG Oral Tablet"|"76307"|"Bipolar Disorder"|"6"|"0.375"  
"133390"|"SEROquel 50 MG Oral Tablet"|"76348"|"Bipolar II Disorder"|"3"|"0.75"  
"133390"|"SEROquel 50 MG Oral Tablet"|"76351"|"Depression"|"14"|"0.325581"  
"133390"|"SEROquel 50 MG Oral Tablet"|"76357"|"Major Depression, Recurrent"|"5"|"0.833333"  
"133390"|"SEROquel 50 MG Oral Tablet"|"76361"|"Moderate Recurrent Major Depression"|"3"|"0.6"  
"133390"|"SEROquel 50 MG Oral Tablet"|"76388"|"Bipolar Disorder NOS"|"8"|"0.666667"  
"133390"|"SEROquel 50 MG Oral Tablet"|"76669"|"Impulse Control Disorder"|"3"|"1"  
"133390"|"SEROquel 50 MG Oral Tablet"|"163354"|"Demonstrated Behavior Psychomotor Agitation"|"2"|"1"  
"133390"|"SEROquel 50 MG Oral Tablet"|"251600"|"Dementia"|"6"|"0.315789"  
"133390"|"SEROquel 50 MG Oral Tablet"|"252575"|"Dementia With Lewy Bodies"|"2"|"0.5"  
"133390"|"SEROquel 50 MG Oral Tablet"|"275592"|"Post-traumatic Stress Disorder"|"3"|"0.3"

"133390""SEROquel 50 MG Oral Tablet""275604""Depression With Anxiety""2""0.4"  
"133545""Ursodiol 60mg/ml""65307""TPN-induced Cholestasis""2""0.5"  
"133563""Pravastatin Sodium 20 MG Oral Tablet""63217""Congestive Heart Failure""4""0.173913"  
"133563""Pravastatin Sodium 20 MG Oral Tablet""67969""Familial Combined Hyperlipidemia""2""0.666667"  
"133563""Pravastatin Sodium 20 MG Oral Tablet""67970""Hyperlipidemia""131""0.639024"  
"133563""Pravastatin Sodium 20 MG Oral Tablet""67974""Frederickson Type IIB Hyperlipidemia""4""1"  
"133563""Pravastatin Sodium 20 MG Oral Tablet""247966""Serum Total Cholesterol Was Elevated""2""0.285714"  
"133563""Pravastatin Sodium 20 MG Oral Tablet""257908""Essential Hypertriglyceridemia""2""0.5"  
"133563""Pravastatin Sodium 20 MG Oral Tablet""278812""Prostate Cancer""2""0.4"  
"133563""Pravastatin Sodium 20 MG Oral Tablet""283291""Hypercholesterolemia""12""0.705882"  
"133563""Pravastatin Sodium 20 MG Oral Tablet""283292""Essential Hypercholesterolemia""4""0.307692"  
"133563""Pravastatin Sodium 20 MG Oral Tablet""291485""Dyslipidemia""16""0.592593"  
"133577""Cardura XL 8 MG Oral Tablet Extended Release 24 Hour""63467""Hypertension""2""0.666667"  
"133579""Clindamycin Phosphate 2 % Vaginal Cream""66213""Vaginitis""5""0.625"  
"133579""Clindamycin Phosphate 2 % Vaginal Cream""66254""Trichomonas Vulvovaginitis""2""0.4"  
"133579""Clindamycin Phosphate 2 % Vaginal Cream""288761""Vaginal Discharge""3""0.6"  
"133579""Clindamycin Phosphate 2 % Vaginal Cream""288790""Bacterial Vaginosis""15""0.681818"  
"133581""Quinapril-Hydrochlorothiazide 20-12.5 MG Oral Tablet""63467""Hypertension""4""0.5"  
"133581""Quinapril-Hydrochlorothiazide 20-12.5 MG Oral Tablet""63468""Essential Hypertension""5""1"  
"133581""Quinapril-Hydrochlorothiazide 20-12.5 MG Oral Tablet""63470""Benign Essential Hypertension""2""0.666667"  
"133582""OneTouch Ultra 2 w/Device Kit""69380""Diabetes Mellitus""2""0.4"  
"133582""OneTouch Ultra 2 w/Device Kit""69402""Diabetes Mellitus Poorly Controlled""2""0.666667"  
"133586""Amitiza 24 MCG Oral Capsule""65076""Irritable Bowel Syndrome""4""1"  
"133642""Terconazole 80 MG Vaginal Suppository""66214""Candida Albicans Vaginitis""2""0.333333"  
"133642""Terconazole 80 MG Vaginal Suppository""66250""Candida Albicans Vulvovaginitis""5""0.714286"  
"133642""Terconazole 80 MG Vaginal Suppository""77211""Vaginal Candidiasis""5""0.416667"  
"133644""Vusion 0.25-15-81.35 % External Ointment""70130""Diaper Rash""2""0.666667"  
"133676""Pravastatin Sodium 40 MG Oral Tablet""62975""Coronary Artery Disease""18""0.120805"  
"133676""Pravastatin Sodium 40 MG Oral Tablet""62978""Coronary Arteriosclerosis""3""0.166667"  
"133676""Pravastatin Sodium 40 MG Oral Tablet""67969""Familial Combined Hyperlipidemia""3""0.375"  
"133676""Pravastatin Sodium 40 MG Oral Tablet""67970""Hyperlipidemia""190""0.618892"  
"133676""Pravastatin Sodium 40 MG Oral Tablet""67974""Frederickson Type IIB Hyperlipidemia""3""0.5"  
"133676""Pravastatin Sodium 40 MG Oral Tablet""67978""Familial Hypercholesterolemia""2""1"  
"133676""Pravastatin Sodium 40 MG Oral Tablet""68098""Lipoid Metabolism Disorder""2""0.285714"  
"133676""Pravastatin Sodium 40 MG Oral Tablet""283291""Hypercholesterolemia""5""0.416667"  
"133676""Pravastatin Sodium 40 MG Oral Tablet""283292""Essential Hypercholesterolemia""20""0.51282"  
"133676""Pravastatin Sodium 40 MG Oral Tablet""291485""Dyslipidemia""20""0.487805"  
"133677""Levemir FlexPen 100 UNIT/ML Subcutaneous Solution""65711""Diabetic Nephropathy Type II""3""0.5"  
"133677""Levemir FlexPen 100 UNIT/ML Subcutaneous Solution""69380""Diabetes Mellitus""29""0.145"  
"133677""Levemir FlexPen 100 UNIT/ML Subcutaneous Solution""69381""Type II Diabetes Mellitus""27""0.230769"  
"133677""Levemir FlexPen 100 UNIT/ML Subcutaneous Solution""69382""Type II Diabetes Mellitus - Uncomplicated, Uncontrolled""4""0.181818"  
"133677""Levemir FlexPen 100 UNIT/ML Subcutaneous Solution""69386""Type II Diabetes Mellitus With Complication - Uncontrolled""5""0.555556"  
"133677""Levemir FlexPen 100 UNIT/ML Subcutaneous Solution""69387""Type I Diabetes Mellitus""4""0.266667"  
"133677""Levemir FlexPen 100 UNIT/ML Subcutaneous Solution""69388""Type I Diabetes Mellitus - Uncontrolled""27""0.84375"  
"133677""Levemir FlexPen 100 UNIT/ML Subcutaneous Solution""69402""Diabetes Mellitus Poorly Controlled""163""0.815"  
"133686""Quinapril-Hydrochlorothiazide 10-12.5 MG Oral Tablet""63468""Essential Hypertension""2""1"  
"133689""Ferrous Fumarate 325 (106 Fe) MG Oral Tablet""66444""Pregnancy Complicated By Anemia""2""1"  
"133696""Pravastatin Sodium 10 MG Oral Tablet""67970""Hyperlipidemia""34""0.557377"

"133696""Pravastatin Sodium 10 MG Oral Tablet""283291""Hypercholesterolemia""3""0.75"  
"133696""Pravastatin Sodium 10 MG Oral Tablet""283292""Essential Hypercholesterolemia""2""0.4"  
"133696""Pravastatin Sodium 10 MG Oral Tablet""291485""Dyslipidemia""5""0.384615"  
"133704""Keppra 1000 MG Oral Tablet""74988""Seizure Disorder""9""0.272727"  
"133704""Keppra 1000 MG Oral Tablet""75001""Partial Complex Psychomotor Seizure""3""1"  
"133704""Keppra 1000 MG Oral Tablet""75002""Partial Complex Psychomotor Seizure With Intractable  
Seizure""9""0.6"  
"133704""Keppra 1000 MG Oral Tablet""252566""Partial Complex Seizure""2""0.25"  
"133730""Loestrin 24 Fe 1-20 MG-MCG Oral Tablet""66016""Oligomenorrhea""3""0.5"  
"133730""Loestrin 24 Fe 1-20 MG-MCG Oral Tablet""66022""Ovarian Cyst""6""0.545455"  
"133730""Loestrin 24 Fe 1-20 MG-MCG Oral Tablet""66070""Menorrhagia""16""0.666667"  
"133730""Loestrin 24 Fe 1-20 MG-MCG Oral Tablet""66071""Pubertal Menorrhagia""2""0.666667"  
"133730""Loestrin 24 Fe 1-20 MG-MCG Oral Tablet""66133""Dysmenorrhea""7""0.411765"  
"133730""Loestrin 24 Fe 1-20 MG-MCG Oral Tablet""66139""Amenorrhea""4""0.363636"  
"133730""Loestrin 24 Fe 1-20 MG-MCG Oral Tablet""66143""Metrorrhagia""2""0.333333"  
"133730""Loestrin 24 Fe 1-20 MG-MCG Oral Tablet""69546""Dysfunctional Uterine Bleeding""2""0.25"  
"133730""Loestrin 24 Fe 1-20 MG-MCG Oral Tablet""69549""Polycystic Ovarian Syndrome""8""0.4"  
"133730""Loestrin 24 Fe 1-20 MG-MCG Oral Tablet""85949""Birth Control Method - Oral  
Contraceptives""5""0.5"  
"133730""Loestrin 24 Fe 1-20 MG-MCG Oral Tablet""88042""Irregular Length Of Menstrual Periods""2""0.5"  
"133730""Loestrin 24 Fe 1-20 MG-MCG Oral Tablet""88049""Excessive Bleeding During Period  
(Menorrhagia)""2""0.666667"  
"133730""Loestrin 24 Fe 1-20 MG-MCG Oral Tablet""187792""Gynecologic Services Contraceptive  
Management""56""0.736842"  
"133730""Loestrin 24 Fe 1-20 MG-MCG Oral Tablet""187793""Gynecologic Services Contraceptive General  
Counseling""4""0.266667"  
"133730""Loestrin 24 Fe 1-20 MG-MCG Oral Tablet""187795""Gynecologic Services Prescription Of Contraceptive  
Agents""7""0.875"  
"133730""Loestrin 24 Fe 1-20 MG-MCG Oral Tablet""187798""Gynecologic Service Prescrip Of Contracept Agent -  
Repeat Rx""4""0.8"  
"133730""Loestrin 24 Fe 1-20 MG-MCG Oral Tablet""202874""Inquiry And Counseling: Contraceptive  
Practices""3""0.6"  
"133730""Loestrin 24 Fe 1-20 MG-MCG Oral Tablet""250989""Oral Contraceptives""54""0.84375"  
"133730""Loestrin 24 Fe 1-20 MG-MCG Oral Tablet""250996""Contraceptives""13""0.928571"  
"133730""Loestrin 24 Fe 1-20 MG-MCG Oral Tablet""251261""Pelvic Pain""4""0.4"  
"133740""Desmopressin Ace Rhinal Tube 0.01 % Nasal Solution""69542""Central Diabetes  
Insipidus""2""0.666667"  
"133741""YAZ 3-0.02 MG Oral Tablet""66070""Menorrhagia""7""0.875"  
"133741""YAZ 3-0.02 MG Oral Tablet""66133""Dysmenorrhea""4""0.333333"  
"133741""YAZ 3-0.02 MG Oral Tablet""69549""Polycystic Ovarian Syndrome""33""0.6"  
"133741""YAZ 3-0.02 MG Oral Tablet""69606""Acne""4""0.235294"  
"133741""YAZ 3-0.02 MG Oral Tablet""76391""Premenstrual Disorder""2""1"  
"133741""YAZ 3-0.02 MG Oral Tablet""85949""Birth Control Method - Oral Contraceptives""4""0.571429"  
"133741""YAZ 3-0.02 MG Oral Tablet""88042""Irregular Length Of Menstrual Periods""2""0.666667"  
"133741""YAZ 3-0.02 MG Oral Tablet""187792""Gynecologic Services Contraceptive  
Management""44""0.698413"  
"133741""YAZ 3-0.02 MG Oral Tablet""187793""Gynecologic Services Contraceptive General  
Counseling""5""0.454545"  
"133741""YAZ 3-0.02 MG Oral Tablet""250989""Oral Contraceptives""9""0.642857"  
"133741""YAZ 3-0.02 MG Oral Tablet""250996""Contraceptives""3""0.428571"  
"133746""Ranexa 500 MG Oral Tablet Extended Release 12 Hour""62975""Coronary Artery  
Disease""18""0.461538"  
"133746""Ranexa 500 MG Oral Tablet Extended Release 12 Hour""62985""Chest Pain""2""0.666667"  
"133746""Ranexa 500 MG Oral Tablet Extended Release 12 Hour""62987""Angina Pectoris""2""0.4"

"133758"|"Fluticasone Propionate 50 MCG/ACT Nasal Suspension"|"28293"|"Rhinitis Medicamentosa"|"2"|"0.222222"  
"133758"|"Fluticasone Propionate 50 MCG/ACT Nasal Suspension"|"60863"|"Difficulty Breathing  
(Dyspnea)"|"6"|"0.122449"  
"133758"|"Fluticasone Propionate 50 MCG/ACT Nasal Suspension"|"60869"|"Cough"|"20"|"0.117647"  
"133758"|"Fluticasone Propionate 50 MCG/ACT Nasal Suspension"|"62557"|"Eustachian Tube Block"|"2"|"0.5"  
"133758"|"Fluticasone Propionate 50 MCG/ACT Nasal Suspension"|"62561"|"Eustachian Tube  
Dysfunction"|"13"|"0.371429"  
"133758"|"Fluticasone Propionate 50 MCG/ACT Nasal Suspension"|"62577"|"Sinusitis"|"8"|"0.125"  
"133758"|"Fluticasone Propionate 50 MCG/ACT Nasal Suspension"|"62578"|"Acute Sinusitis"|"33"|"0.264"  
"133758"|"Fluticasone Propionate 50 MCG/ACT Nasal Suspension"|"62580"|"Acute Maxillary  
Sinusitis"|"7"|"0.184211"  
"133758"|"Fluticasone Propionate 50 MCG/ACT Nasal Suspension"|"62585"|"Chronic Sinusitis"|"18"|"0.253521"  
"133758"|"Fluticasone Propionate 50 MCG/ACT Nasal Suspension"|"62586"|"Chronic Maxillary  
Sinusitis"|"33"|"0.266129"  
"133758"|"Fluticasone Propionate 50 MCG/ACT Nasal Suspension"|"62587"|"Chronic Frontal  
Sinusitis"|"11"|"0.161765"  
"133758"|"Fluticasone Propionate 50 MCG/ACT Nasal Suspension"|"62588"|"Chronic Ethmoidal  
Sinusitis"|"49"|"0.415254"  
"133758"|"Fluticasone Propionate 50 MCG/ACT Nasal Suspension"|"62589"|"Chronic Sphenoidal Sinusitis"|"3"|"0.12"  
"133758"|"Fluticasone Propionate 50 MCG/ACT Nasal Suspension"|"62590"|"Chronic Pansinusitis"|"2"|"0.25"  
"133758"|"Fluticasone Propionate 50 MCG/ACT Nasal Suspension"|"62591"|"Nasal Polyps"|"9"|"0.204545"  
"133758"|"Fluticasone Propionate 50 MCG/ACT Nasal Suspension"|"62597"|"Rhinitis"|"14"|"0.56"  
"133758"|"Fluticasone Propionate 50 MCG/ACT Nasal Suspension"|"62598"|"Allergic Rhinitis"|"630"|"0.732558"  
"133758"|"Fluticasone Propionate 50 MCG/ACT Nasal Suspension"|"62599"|"Allergic Rhinitis Due To  
Pollen"|"16"|"0.533333"  
"133758"|"Fluticasone Propionate 50 MCG/ACT Nasal Suspension"|"62610"|"Vasomotor Rhinitis"|"4"|"0.666667"  
"133758"|"Fluticasone Propionate 50 MCG/ACT Nasal Suspension"|"62611"|"Chronic Rhinitis"|"53"|"0.481818"  
"133758"|"Fluticasone Propionate 50 MCG/ACT Nasal Suspension"|"62614"|"Deviated Nasal Septum  
(Acquired)"|"23"|"0.141104"  
"133758"|"Fluticasone Propionate 50 MCG/ACT Nasal Suspension"|"62615"|"Hypertrophied Nasal  
Turbinate"|"14"|"0.205882"  
"133758"|"Fluticasone Propionate 50 MCG/ACT Nasal Suspension"|"62753"|"Adenoid Hypertrophy"|"3"|"0.214286"  
"133758"|"Fluticasone Propionate 50 MCG/ACT Nasal Suspension"|"64181"|"Asthma"|"27"|"0.0678392"  
"133758"|"Fluticasone Propionate 50 MCG/ACT Nasal Suspension"|"64205"|"Chronic Obstructive Pulmonary  
Disease"|"6"|"0.113208"  
"133758"|"Fluticasone Propionate 50 MCG/ACT Nasal Suspension"|"64223"|"Bronchiectasis"|"2"|"0.222222"  
"133758"|"Fluticasone Propionate 50 MCG/ACT Nasal Suspension"|"75487"|"Atypical Face Pain"|"3"|"0.136364"  
"133758"|"Fluticasone Propionate 50 MCG/ACT Nasal Suspension"|"76702"|"Viral Infection"|"2"|"0.222222"  
"133758"|"Fluticasone Propionate 50 MCG/ACT Nasal Suspension"|"77265"|"Phaehyphomycosis"|"3"|"0.75"  
"133758"|"Fluticasone Propionate 50 MCG/ACT Nasal Suspension"|"77890"|"Upper Respiratory  
Infection"|"26"|"0.234234"  
"133758"|"Fluticasone Propionate 50 MCG/ACT Nasal Suspension"|"77891"|"Acute Upper Respiratory  
Infection"|"28"|"0.145078"  
"133758"|"Fluticasone Propionate 50 MCG/ACT Nasal Suspension"|"87011"|"Drip Or Drainage Down Throat From  
Above"|"10"|"0.285714"  
"133758"|"Fluticasone Propionate 50 MCG/ACT Nasal Suspension"|"87028"|"Nasal Passage Blockage  
(Stuffiness)"|"18"|"0.45"  
"133758"|"Fluticasone Propionate 50 MCG/ACT Nasal Suspension"|"173466"|"Obstructive Sleep  
Apnea"|"12"|"0.0875912"  
"133758"|"Fluticasone Propionate 50 MCG/ACT Nasal Suspension"|"288961"|"Anosmia"|"2"|"0.4"  
"133758"|"Fluticasone Propionate 50 MCG/ACT Nasal Suspension"|"289113"|"Acute Rhinitis"|"3"|"0.333333"  
"133758"|"Fluticasone Propionate 50 MCG/ACT Nasal Suspension"|"292021"|"Complaint Of Allergic Reaction  
Seasonal"|"2"|"0.666667"  
"133758"|"Fluticasone Propionate 50 MCG/ACT Nasal Suspension"|"292640"|"Rhinosinusitis"|"2"|"0.333333"

"133758"|"Fluticasone Propionate 50 MCG/ACT Nasal Suspension"|"297216"|"Acute Nasopharyngitis"|"3"|"0.75"  
"133760"|"Zegerid 40-1100 MG Oral Capsule"|"64688"|"Esophageal Reflux"|"2"|"0.666667"  
"133919"|"Bethanechol Suspension"|"60895"|"Vomiting (Symptom)"|"7"|"0.538462"  
"133919"|"Bethanechol Suspension"|"64688"|"Esophageal Reflux"|"52"|"0.722222"  
"133919"|"Bethanechol Suspension"|"64748"|"Gastroparesis"|"2"|"0.285714"  
"133919"|"Bethanechol Suspension"|"292064"|"Dysphagia"|"3"|"0.136364"  
"133920"|"NPH Insulin"|"66433"|"Pregnancy Complicated By Diabetes Mellitus"|"4"|"0.8"  
"133920"|"NPH Insulin"|"69380"|"Diabetes Mellitus"|"27"|"0.442623"  
"133920"|"NPH Insulin"|"69381"|"Type II Diabetes Mellitus"|"6"|"0.375"  
"133920"|"NPH Insulin"|"69382"|"Type II Diabetes Mellitus - Uncomplicated, Uncontrolled"|"2"|"0.333333"  
"133920"|"NPH Insulin"|"69395"|"Gestational Diabetes Mellitus"|"2"|"0.666667"  
"133920"|"NPH Insulin"|"69402"|"Diabetes Mellitus Poorly Controlled"|"10"|"0.416667"  
"133922"|"Magic Mouthwash"|"60889"|"Pain On Swallowing"|"2"|"1"  
"133922"|"Magic Mouthwash"|"62678"|"Aphthous Ulcer"|"4"|"0.571429"  
"133922"|"Magic Mouthwash"|"62760"|"Acute Pharyngitis"|"2"|"0.222222"  
"133922"|"Magic Mouthwash"|"77206"|"Oral Thrush"|"2"|"0.5"  
"133922"|"Magic Mouthwash"|"79017"|"Hepatocellular Carcinoma Of The Liver"|"2"|"1"  
"133922"|"Magic Mouthwash"|"80847"|"Renal Cell Carcinoma"|"4"|"0.8"  
"133922"|"Magic Mouthwash"|"81092"|"Non-Hodgkin's Lymphoma"|"2"|"0.666667"  
"133922"|"Magic Mouthwash"|"181372"|"Renal Carcinoma"|"3"|"1"  
"133922"|"Magic Mouthwash"|"260898"|"Kidney Cancer"|"3"|"1"  
"133922"|"Magic Mouthwash"|"274534"|"Acute Sore Throat"|"2"|"0.5"  
"133922"|"Magic Mouthwash"|"278781"|"Lung Cancer"|"2"|"0.666667"  
"133922"|"Magic Mouthwash"|"278808"|"Breast Cancer"|"2"|"0.333333"  
"133922"|"Magic Mouthwash"|"278812"|"Prostate Cancer"|"6"|"0.857143"  
"133924"|"Auralgan"|"265990"|"Earache (Symptom)"|"2"|"1"  
"133925"|"Ergocalciferol TABS"|"68058"|"Vitamin D Deficiency"|"91"|"0.558282"  
"133925"|"Ergocalciferol TABS"|"69341"|"Osteoporosis"|"11"|"0.171875"  
"133925"|"Ergocalciferol TABS"|"274672"|"Chronic Kidney Disease, Stage 4"|"4"|"0.266667"  
"133926"|"One Touch Ultra Test Strips"|"69380"|"Diabetes Mellitus"|"73"|"0.349282"  
"133926"|"One Touch Ultra Test Strips"|"69381"|"Type II Diabetes Mellitus"|"44"|"0.357724"  
"133926"|"One Touch Ultra Test Strips"|"69382"|"Type II Diabetes Mellitus - Uncomplicated, Uncontrolled"|"10"|"0.344828"  
"133926"|"One Touch Ultra Test Strips"|"69387"|"Type I Diabetes Mellitus"|"23"|"0.511111"  
"133926"|"One Touch Ultra Test Strips"|"69388"|"Type I Diabetes Mellitus - Uncontrolled"|"67"|"0.881579"  
"133926"|"One Touch Ultra Test Strips"|"69395"|"Gestational Diabetes Mellitus"|"2"|"0.4"  
"133926"|"One Touch Ultra Test Strips"|"69401"|"Diabetes Mellitus Under Control"|"2"|"0.25"  
"133926"|"One Touch Ultra Test Strips"|"69402"|"Diabetes Mellitus Poorly Controlled"|"106"|"0.757143"  
"133926"|"One Touch Ultra Test Strips"|"258942"|"Type II Diabetes Mellitus - Uncomplicated, Controlled"|"2"|"0.25"  
"133929"|"Diovan 320/25 CAPS"|"63468"|"Essential Hypertension"|"4"|"0.363636"  
"133930"|"Clonidine Patch"|"63467"|"Hypertension"|"5"|"0.263158"  
"133930"|"Clonidine Patch"|"63471"|"Accelerated Essential Hypertension"|"2"|"1"  
"133934"|"Prevacid"|"60895"|"Vomiting (Symptom)"|"3"|"0.25"  
"133934"|"Prevacid"|"60899"|"Abdominal Pain"|"3"|"0.5"  
"133934"|"Prevacid"|"64688"|"Esophageal Reflux"|"83"|"0.633588"  
"133935"|"Opana ER 20 MG Oral Tablet Extended Release 12 Hour"|"288921"|"Chronic Pain"|"2"|"0.4"  
"133947"|"Loratadine 5 MG/5ML Oral Syrup"|"61029"|"Itching (Pruritus)"|"2"|"1"  
"133947"|"Loratadine 5 MG/5ML Oral Syrup"|"62598"|"Allergic Rhinitis"|"240"|"0.634921"  
"133947"|"Loratadine 5 MG/5ML Oral Syrup"|"64565"|"Upper Respiratory Tract Disorders"|"17"|"0.269841"  
"133947"|"Loratadine 5 MG/5ML Oral Syrup"|"70112"|"Atopic Dermatitis"|"13"|"0.101562"  
"133947"|"Loratadine 5 MG/5ML Oral Syrup"|"77891"|"Acute Upper Respiratory Infection"|"12"|"0.0839161"  
"133947"|"Loratadine 5 MG/5ML Oral Syrup"|"93702"|"Allergies"|"8"|"0.123077"  
"133948"|"Pen Needles 31G X 6 MM Miscellaneous"|"69380"|"Diabetes Mellitus"|"8"|"0.4"  
"133948"|"Pen Needles 31G X 6 MM Miscellaneous"|"69381"|"Type II Diabetes Mellitus"|"2"|"0.25"

"133948"|"Pen Needles 31G X 6 MM Miscellaneous"|"69387"|"Type I Diabetes Mellitus"|"4"|"0.571429"  
"133948"|"Pen Needles 31G X 6 MM Miscellaneous"|"69402"|"Diabetes Mellitus Poorly Controlled"|"4"|"0.571429"  
"133955"|"Chantix 1 MG Oral Tablet"|"76090"|"Nicotine Dependence"|"5"|"0.384615"  
"133961"|"Oracea 40 MG Oral Capsule Delayed Release"|"69913"|"Rosacea"|"2"|"0.285714"  
"133968"|"Brompheniramine-Pseudoeph 9-90 MG Oral Capsule Extended Release 12 Hour"|"60869"|"Cough"|"3"|"1"  
"133970"|"Azilect 1 MG Oral Tablet"|"75080"|"Parkinson's Disease"|"18"|"0.580645"  
"133970"|"Azilect 1 MG Oral Tablet"|"293598"|"Parkinsonism"|"2"|"0.666667"  
"133973"|"Cipro 500 MG/5ML (10%) Oral Suspension Reconstituted"|"32925"|"Chronic Respiratory Failure"|"2"|"0.5"  
"133973"|"Cipro 500 MG/5ML (10%) Oral Suspension Reconstituted"|"65762"|"Urinary Tract Infection"|"4"|"1"  
"133974"|"Azithromycin 200 MG/5ML Oral Suspension Reconstituted"|"32925"|"Chronic Respiratory Failure"|"3"|"0.75"  
"133974"|"Azithromycin 200 MG/5ML Oral Suspension Reconstituted"|"60869"|"Cough"|"6"|"0.26087"  
"133974"|"Azithromycin 200 MG/5ML Oral Suspension Reconstituted"|"62343"|"Otitis Media"|"4"|"0.16"  
"133974"|"Azithromycin 200 MG/5ML Oral Suspension Reconstituted"|"62354"|"Acute Serous Otitis Media Of Both Ears"|"2"|"0.666667"  
"133974"|"Azithromycin 200 MG/5ML Oral Suspension Reconstituted"|"62404"|"Otitis Media In Both Ears"|"2"|"0.285714"  
"133974"|"Azithromycin 200 MG/5ML Oral Suspension Reconstituted"|"62577"|"Sinusitis"|"9"|"0.375"  
"133974"|"Azithromycin 200 MG/5ML Oral Suspension Reconstituted"|"62578"|"Acute Sinusitis"|"2"|"0.222222"  
"133974"|"Azithromycin 200 MG/5ML Oral Suspension Reconstituted"|"64118"|"Acute Bronchitis"|"5"|"0.5"  
"133974"|"Azithromycin 200 MG/5ML Oral Suspension Reconstituted"|"64126"|"Pneumonia"|"5"|"0.217391"  
"133974"|"Azithromycin 200 MG/5ML Oral Suspension Reconstituted"|"64155"|"Primary Atypical Mycoplasma Pneumoniae"|"6"|"0.666667"  
"133974"|"Azithromycin 200 MG/5ML Oral Suspension Reconstituted"|"64158"|"Atypical Mycobacterial Pneumonia"|"2"|"0.666667"  
"133974"|"Azithromycin 200 MG/5ML Oral Suspension Reconstituted"|"64181"|"Asthma"|"13"|"0.118182"  
"133974"|"Azithromycin 200 MG/5ML Oral Suspension Reconstituted"|"64220"|"Bronchiolitis Obliterans"|"2"|"0.666667"  
"133974"|"Azithromycin 200 MG/5ML Oral Suspension Reconstituted"|"64288"|"Pneumonitis"|"9"|"0.9"  
"133974"|"Azithromycin 200 MG/5ML Oral Suspension Reconstituted"|"77011"|"Mycoplasma Infection"|"4"|"0.666667"  
"133974"|"Azithromycin 200 MG/5ML Oral Suspension Reconstituted"|"77891"|"Acute Upper Respiratory Infection"|"6"|"0.115385"  
"133974"|"Azithromycin 200 MG/5ML Oral Suspension Reconstituted"|"78152"|"Immunodeficiency Disorders"|"2"|"0.5"  
"133974"|"Azithromycin 200 MG/5ML Oral Suspension Reconstituted"|"251528"|"Acute Otitis Media"|"9"|"0.375"  
"133974"|"Azithromycin 200 MG/5ML Oral Suspension Reconstituted"|"251575"|"Streptococcal Sore Throat"|"3"|"0.5"  
"133974"|"Azithromycin 200 MG/5ML Oral Suspension Reconstituted"|"257912"|"Disorder Of Mitochondrial Metabolism"|"3"|"0.6"  
"133974"|"Azithromycin 200 MG/5ML Oral Suspension Reconstituted"|"274516"|"Acute Pharyngitis Streptococcus"|"2"|"0.5"  
"133974"|"Azithromycin 200 MG/5ML Oral Suspension Reconstituted"|"282676"|"Lymphadenopathy"|"2"|"0.666667"  
"133978"|"Trazamine 50 MG Oral Miscellaneous"|"76351"|"Depression"|"2"|"0.666667"  
"133995"|"Gardasil Suspension"|"296450"|"Need For Vaccination Human Papilloma Virus"|"2"|"1"  
"134000"|"Potassium Citrate 5 MEQ (540 MG) Oral Tablet Extended Release"|"65662"|"Nephrolithiasis"|"2"|"1"  
"134003"|"Daytrana 20 MG/9HR Transdermal Patch"|"275486"|"ADHD, Combined Type"|"3"|"0.75"  
"134009"|"Azithromycin 100 MG/5ML Oral Suspension Reconstituted"|"60869"|"Cough"|"3"|"0.3"  
"134009"|"Azithromycin 100 MG/5ML Oral Suspension Reconstituted"|"62598"|"Allergic Rhinitis"|"4"|"0.117647"  
"134009"|"Azithromycin 100 MG/5ML Oral Suspension Reconstituted"|"77890"|"Upper Respiratory Infection"|"4"|"0.153846"  
"134009"|"Azithromycin 100 MG/5ML Oral Suspension Reconstituted"|"77891"|"Acute Upper Respiratory Infection"|"7"|"0.225806"  
"134009"|"Azithromycin 100 MG/5ML Oral Suspension Reconstituted"|"166748"|"Asthma With Acute Exacerbation"|"2"|"0.666667"

"134009"|"Azithromycin 100 MG/5ML Oral Suspension Reconstituted"|"251528"|"Acute Otitis Media"|"10"|"0.322581"

"134014"|"Sildec PE-DM 12.5-4-15 MG/5ML Oral Syrup"|"60869"|"Cough"|"2"|"1"

"134019"|"Humira Pen 40 MG/0.8ML Subcutaneous Kit"|"70455"|"Rheumatoid Arthritis"|"54"|"0.931035"

"134019"|"Humira Pen 40 MG/0.8ML Subcutaneous Kit"|"70706"|"Ankylosing Spondylitis"|"14"|"0.823529"

"134019"|"Humira Pen 40 MG/0.8ML Subcutaneous Kit"|"70719"|"Psoriatic Arthropathy"|"13"|"0.8125"

"134019"|"Humira Pen 40 MG/0.8ML Subcutaneous Kit"|"70722"|"Spondylitis"|"2"|"0.666667"

"134027"|"Daytrana 10 MG/9HR Transdermal Patch"|"75818"|"Attention-deficit Hyperactivity Disorder"|"3"|"0.75"

"134027"|"Daytrana 10 MG/9HR Transdermal Patch"|"275486"|"ADHD, Combined Type"|"9"|"0.9"

"134037"|"Simvastatin 20 MG Oral Tablet"|"67969"|"Familial Combined Hyperlipidemia"|"3"|"0.5"

"134037"|"Simvastatin 20 MG Oral Tablet"|"67970"|"Hyperlipidemia"|"450"|"0.667656"

"134037"|"Simvastatin 20 MG Oral Tablet"|"67978"|"Familial Hypercholesterolemia"|"2"|"0.333333"

"134037"|"Simvastatin 20 MG Oral Tablet"|"68098"|"Lipoid Metabolism Disorder"|"9"|"0.409091"

"134037"|"Simvastatin 20 MG Oral Tablet"|"283291"|"Hypercholesterolemia"|"34"|"0.523077"

"134037"|"Simvastatin 20 MG Oral Tablet"|"283292"|"Essential Hypercholesterolemia"|"38"|"0.655172"

"134037"|"Simvastatin 20 MG Oral Tablet"|"291485"|"Dyslipidemia"|"49"|"0.466667"

"134038"|"OneTouch Ultra Mini w/Device Kit"|"69380"|"Diabetes Mellitus"|"3"|"0.428571"

"134038"|"OneTouch Ultra Mini w/Device Kit"|"69381"|"Type II Diabetes Mellitus"|"2"|"0.5"

"134042"|"Diovan HCT 320-12.5 MG Oral Tablet"|"63467"|"Hypertension"|"10"|"0.5"

"134042"|"Diovan HCT 320-12.5 MG Oral Tablet"|"63468"|"Essential Hypertension"|"5"|"0.333333"

"134042"|"Diovan HCT 320-12.5 MG Oral Tablet"|"63470"|"Benign Essential Hypertension"|"4"|"0.363636"

"134050"|"Simvastatin 40 MG Oral Tablet"|"62975"|"Coronary Artery Disease"|"34"|"0.125926"

"134050"|"Simvastatin 40 MG Oral Tablet"|"62978"|"Coronary Arteriosclerosis"|"7"|"0.269231"

"134050"|"Simvastatin 40 MG Oral Tablet"|"63467"|"Hypertension"|"15"|"0.0227273"

"134050"|"Simvastatin 40 MG Oral Tablet"|"67969"|"Familial Combined Hyperlipidemia"|"4"|"0.444444"

"134050"|"Simvastatin 40 MG Oral Tablet"|"67970"|"Hyperlipidemia"|"457"|"0.600526"

"134050"|"Simvastatin 40 MG Oral Tablet"|"67974"|"Frederickson Type IIB Hyperlipidemia"|"5"|"0.833333"

"134050"|"Simvastatin 40 MG Oral Tablet"|"67978"|"Familial Hypercholesterolemia"|"2"|"0.285714"

"134050"|"Simvastatin 40 MG Oral Tablet"|"68098"|"Lipoid Metabolism Disorder"|"4"|"0.210526"

"134050"|"Simvastatin 40 MG Oral Tablet"|"283291"|"Hypercholesterolemia"|"24"|"0.347826"

"134050"|"Simvastatin 40 MG Oral Tablet"|"283292"|"Essential Hypercholesterolemia"|"32"|"0.477612"

"134050"|"Simvastatin 40 MG Oral Tablet"|"291485"|"Dyslipidemia"|"43"|"0.421569"

"134052"|"Megestrol Acetate 400 MG/10ML Oral Suspension"|"60880"|"Appetite Lost (Anorexia)"|"2"|"1"

"134052"|"Megestrol Acetate 400 MG/10ML Oral Suspension"|"75868"|"Feeding Disorder Of Infancy / Early Childhood"|"3"|"0.75"

"134052"|"Megestrol Acetate 400 MG/10ML Oral Suspension"|"76442"|"Failure To Thrive In Childhood"|"5"|"0.625"

"134057"|"Opana ER 40 MG Oral Tablet Extended Release 12 Hour"|"85691"|"Neck Pain"|"2"|"1"

"134057"|"Opana ER 40 MG Oral Tablet Extended Release 12 Hour"|"288921"|"Chronic Pain"|"2"|"1"

"134058"|"Enbrel SureClick 50 MG/ML Subcutaneous Solution"|"70455"|"Rheumatoid Arthritis"|"45"|"0.865385"

"134058"|"Enbrel SureClick 50 MG/ML Subcutaneous Solution"|"70704"|"Symmetric Polyarticular Inflammation"|"2"|"0.285714"

"134058"|"Enbrel SureClick 50 MG/ML Subcutaneous Solution"|"70706"|"Ankylosing Spondylitis"|"10"|"1"

"134058"|"Enbrel SureClick 50 MG/ML Subcutaneous Solution"|"70719"|"Psoriatic Arthropathy"|"8"|"0.727273"

"134058"|"Enbrel SureClick 50 MG/ML Subcutaneous Solution"|"70722"|"Spondylitis"|"2"|"0.666667"

"134064"|"Zidovudine 100 MG Oral Capsule"|"76835"|"HIV Infection"|"2"|"1"

"134067"|"Lotrel 10-40 MG Oral Capsule"|"63467"|"Hypertension"|"5"|"0.217391"

"134067"|"Lotrel 10-40 MG Oral Capsule"|"63468"|"Essential Hypertension"|"7"|"0.777778"

"134071"|"Revlimid 25 MG Oral Capsule"|"81217"|"Multiple Myeloma"|"2"|"1"

"134074"|"Ranitidine HCl 150 MG/10ML Oral Syrup"|"60899"|"Abdominal Pain"|"2"|"1"

"134074"|"Ranitidine HCl 150 MG/10ML Oral Syrup"|"62785"|"Laryngomalacia"|"2"|"1"

"134074"|"Ranitidine HCl 150 MG/10ML Oral Syrup"|"64688"|"Esophageal Reflux"|"11"|"0.733333"

"134074"|"Ranitidine HCl 150 MG/10ML Oral Syrup"|"76442"|"Failure To Thrive In Childhood"|"2"|"0.666667"

"134076"|"Simvastatin 10 MG Oral Tablet"|"67970"|"Hyperlipidemia"|"135"|"0.671642"

"134076"|"Simvastatin 10 MG Oral Tablet"|"68098"|"Lipoid Metabolism Disorder"|"3"|"0.428571"

"134076"|"Simvastatin 10 MG Oral Tablet"|"283291"|"Hypercholesterolemia"|"6"|"0.333333"  
"134076"|"Simvastatin 10 MG Oral Tablet"|"283292"|"Essential Hypercholesterolemia"|"5"|"0.454545"  
"134076"|"Simvastatin 10 MG Oral Tablet"|"291485"|"Dyslipidemia"|"28"|"0.622222"  
"134079"|"Simvastatin 5 MG Oral Tablet"|"67970"|"Hyperlipidemia"|"8"|"0.571429"  
"134079"|"Simvastatin 5 MG Oral Tablet"|"75032"|"Vascular Dementia"|"3"|"0.5"  
"134079"|"Simvastatin 5 MG Oral Tablet"|"251600"|"Dementia"|"2"|"0.666667"  
"134087"|"MetroNIDAZOLE 0.75 % External Gel"|"69913"|"Rosacea"|"2"|"1"  
"134088"|"Simvastatin 80 MG Oral Tablet"|"62975"|"Coronary Artery Disease"|"16"|"0.125"  
"134088"|"Simvastatin 80 MG Oral Tablet"|"67970"|"Hyperlipidemia"|"143"|"0.60084"  
"134088"|"Simvastatin 80 MG Oral Tablet"|"67978"|"Familial Hypercholesterolemia"|"2"|"1"  
"134088"|"Simvastatin 80 MG Oral Tablet"|"68098"|"Lipoid Metabolism Disorder"|"2"|"0.4"  
"134088"|"Simvastatin 80 MG Oral Tablet"|"283291"|"Hypercholesterolemia"|"4"|"0.363636"  
"134088"|"Simvastatin 80 MG Oral Tablet"|"283292"|"Essential Hypercholesterolemia"|"8"|"0.444444"  
"134088"|"Simvastatin 80 MG Oral Tablet"|"291485"|"Dyslipidemia"|"17"|"0.68"  
"134092"|"Chantix 0.5 MG Oral Tablet"|"76090"|"Nicotine Dependence"|"6"|"0.428571"  
"134092"|"Chantix 0.5 MG Oral Tablet"|"76091"|"Nicotine Dependence - Continuous"|"2"|"1"  
"134092"|"Chantix 0.5 MG Oral Tablet"|"85752"|"Tobacco Use"|"5"|"0.277778"  
"134094"|"Chantix Continuing Month Pak 1 MG Oral Tablet"|"69381"|"Type II Diabetes Mellitus"|"2"|"0.25"  
"134094"|"Chantix Continuing Month Pak 1 MG Oral Tablet"|"76090"|"Nicotine Dependence"|"11"|"0.458333"  
"134094"|"Chantix Continuing Month Pak 1 MG Oral Tablet"|"76091"|"Nicotine Dependence - Continuous"|"2"|"0.5"  
"134094"|"Chantix Continuing Month Pak 1 MG Oral Tablet"|"85752"|"Tobacco Use"|"4"|"0.114286"  
"134094"|"Chantix Continuing Month Pak 1 MG Oral Tablet"|"291647"|"Intervention And Counseling On Cessation Of Tobacco Use"|"8"|"0.888889"  
"134099"|"Clarithromycin 500 MG Oral Tablet Extended Release 24 Hour"|"62578"|"Acute Sinusitis"|"7"|"0.636364"  
"134099"|"Clarithromycin 500 MG Oral Tablet Extended Release 24 Hour"|"62587"|"Chronic Frontal Sinusitis"|"2"|"0.5"  
"134099"|"Clarithromycin 500 MG Oral Tablet Extended Release 24 Hour"|"62588"|"Chronic Ethmoidal Sinusitis"|"3"|"0.6"  
"134099"|"Clarithromycin 500 MG Oral Tablet Extended Release 24 Hour"|"64118"|"Acute Bronchitis"|"7"|"0.875"  
"134102"|"Fenofibrate 160 MG Oral Tablet"|"67969"|"Familial Combined Hyperlipidemia"|"2"|"1"  
"134102"|"Fenofibrate 160 MG Oral Tablet"|"67970"|"Hyperlipidemia"|"24"|"0.533333"  
"134102"|"Fenofibrate 160 MG Oral Tablet"|"257908"|"Essential Hypertriglyceridemia"|"14"|"0.823529"  
"134102"|"Fenofibrate 160 MG Oral Tablet"|"291485"|"Dyslipidemia"|"4"|"0.5"  
"134107"|"Meloxicam 15 MG Oral Tablet"|"31947"|"Lumbago"|"2"|"0.666667"  
"134107"|"Meloxicam 15 MG Oral Tablet"|"70146"|"Osteoarthritis"|"12"|"0.413793"  
"134107"|"Meloxicam 15 MG Oral Tablet"|"70166"|"Localized Primary Osteoarthritis Of The Knee"|"3"|"0.6"  
"134107"|"Meloxicam 15 MG Oral Tablet"|"70193"|"Localized Osteoarthritis Of The Knee"|"2"|"0.666667"  
"134107"|"Meloxicam 15 MG Oral Tablet"|"70198"|"Generalized Osteoarthritis Of Multiple Sites"|"2"|"1"  
"134107"|"Meloxicam 15 MG Oral Tablet"|"70219"|"Osteoarthritis Of The Knee"|"2"|"0.666667"  
"134107"|"Meloxicam 15 MG Oral Tablet"|"70221"|"Osteoarthritis Of Multiple Sites"|"3"|"0.375"  
"134107"|"Meloxicam 15 MG Oral Tablet"|"70455"|"Rheumatoid Arthritis"|"16"|"0.615385"  
"134107"|"Meloxicam 15 MG Oral Tablet"|"70472"|"Systemic Lupus Erythematosus"|"4"|"0.571429"  
"134107"|"Meloxicam 15 MG Oral Tablet"|"70475"|"Scleroderma"|"2"|"1"  
"134107"|"Meloxicam 15 MG Oral Tablet"|"70702"|"Polyarthropathy Of Multiple Sites"|"2"|"1"  
"134107"|"Meloxicam 15 MG Oral Tablet"|"70704"|"Symmetric Polyarticular Inflammation"|"2"|"0.666667"  
"134107"|"Meloxicam 15 MG Oral Tablet"|"70706"|"Ankylosing Spondylitis"|"7"|"0.777778"  
"134107"|"Meloxicam 15 MG Oral Tablet"|"70722"|"Spondylitis"|"5"|"1"  
"134107"|"Meloxicam 15 MG Oral Tablet"|"73666"|"Backache"|"9"|"0.409091"  
"134107"|"Meloxicam 15 MG Oral Tablet"|"75812"|"Myalgia And Myositis"|"2"|"0.25"  
"134107"|"Meloxicam 15 MG Oral Tablet"|"85614"|"Joint Pain, Localized In The Hip"|"3"|"0.333333"  
"134107"|"Meloxicam 15 MG Oral Tablet"|"85623"|"Joint Pain, Localized In The Knee"|"9"|"0.391304"  
"134107"|"Meloxicam 15 MG Oral Tablet"|"85638"|"Ankle Joint Pain"|"2"|"0.285714"  
"134107"|"Meloxicam 15 MG Oral Tablet"|"85644"|"Foot Pain (Soft Tissue)"|"2"|"0.4"  
"134107"|"Meloxicam 15 MG Oral Tablet"|"85701"|"Joint Pain, Localized In The Shoulder"|"3"|"0.5"

"134107"|"Meloxicam 15 MG Oral Tablet"|"91089"|"Lower Back Pain"|"9"|"0.5"  
"134107"|"Meloxicam 15 MG Oral Tablet"|"92456"|"Joint Pain, Localized In More Than One Joint"|"2"|"0.25"  
"134107"|"Meloxicam 15 MG Oral Tablet"|"257996"|"Arthritis"|"5"|"0.238095"  
"134107"|"Meloxicam 15 MG Oral Tablet"|"278685"|"Arthralgias In Multiple Sites"|"16"|"0.842105"  
"134107"|"Meloxicam 15 MG Oral Tablet"|"288921"|"Chronic Pain"|"2"|"0.285714"  
"134117"|"Pramoxine HCl 1 % Rectal Foam"|"65128"|"Hemorrhoids"|"2"|"1"  
"134129"|"Finasteride 5 MG Oral Tablet"|"69549"|"Polycystic Ovarian Syndrome"|"2"|"1"  
"134129"|"Finasteride 5 MG Oral Tablet"|"138023"|"Alopecia"|"3"|"0.375"  
"134129"|"Finasteride 5 MG Oral Tablet"|"257887"|"Benign Prostatic Hyperplasia With Urinary  
Obstruction"|"2"|"0.666667"  
"134129"|"Finasteride 5 MG Oral Tablet"|"283124"|"Prostatic Hyperplasia Without Urinary Obstruction With Other  
Lower Urinary Tract Symptoms"|"2"|"1"  
"134129"|"Finasteride 5 MG Oral Tablet"|"283128"|"Benign Localized Prostatic Hyperplasia"|"5"|"0.714286"  
"134129"|"Finasteride 5 MG Oral Tablet"|"283130"|"Benign Localized Prostatic Hyperplasia Without Urinary  
Obstruction With Other Lower Urinary Tract Symptoms"|"2"|"0.285714"  
"134129"|"Finasteride 5 MG Oral Tablet"|"283131"|"Benign Prostatic Hyperplasia Localized With Urinary Obstruction  
With Other Lower Urinary Tract Symptoms"|"3"|"0.5"  
"134129"|"Finasteride 5 MG Oral Tablet"|"289130"|"Benign Prostatic Hypertrophy With Urinary Obstruction"|"3"|"0.3"  
"134129"|"Finasteride 5 MG Oral Tablet"|"289131"|"Benign Prostatic Hypertrophy"|"20"|"0.5"  
"134129"|"Finasteride 5 MG Oral Tablet"|"289133"|"Benign Prostatic Hypertrophy With Urinary Obstruction With  
Other Lower Urinary Tract Symptoms"|"2"|"1"  
"134143"|"Potassium Citrate 10 MEQ (1080 MG) Oral Tablet Extended  
Release"|"65662"|"Nephrolithiasis"|"3"|"0.333333"  
"134153"|"Daytrana 30 MG/9HR Transdermal Patch"|"275486"|"ADHD, Combined Type"|"2"|"1"  
"134181"|"Atripla 600-200-300 MG Oral Tablet"|"76835"|"HIV Infection"|"78"|"0.764706"  
"134181"|"Atripla 600-200-300 MG Oral Tablet"|"76842"|"Acquired Immunodeficiency Syndrome  
(AIDS)"|"29"|"0.828571"  
"134181"|"Atripla 600-200-300 MG Oral Tablet"|"293618"|"HIV Infection CDC Classification A1"|"2"|"1"  
"134185"|"Seasonique 0.15-0.03 &0.01 MG Oral Tablet"|"66070"|"Menorrhagia"|"3"|"0.75"  
"134185"|"Seasonique 0.15-0.03 &0.01 MG Oral Tablet"|"66087"|"Endometriosis"|"2"|"1"  
"134185"|"Seasonique 0.15-0.03 &0.01 MG Oral Tablet"|"66133"|"Dysmenorrhea"|"2"|"0.333333"  
"134185"|"Seasonique 0.15-0.03 &0.01 MG Oral Tablet"|"187792"|"Gynecologic Services Contraceptive  
Management"|"13"|"0.8125"  
"134185"|"Seasonique 0.15-0.03 &0.01 MG Oral Tablet"|"187795"|"Gynecologic Services Prescription Of  
Contraceptive Agents"|"2"|"1"  
"134185"|"Seasonique 0.15-0.03 &0.01 MG Oral Tablet"|"250989"|"Oral Contraceptives"|"5"|"1"  
"134188"|"Lantus for OptiClik 100 UNIT/ML SOLN"|"69380"|"Diabetes Mellitus"|"2"|"0.5"  
"134194"|"Meloxicam 7.5 MG Oral Tablet"|"70146"|"Osteoarthritis"|"18"|"0.5625"  
"134194"|"Meloxicam 7.5 MG Oral Tablet"|"70166"|"Localized Primary Osteoarthritis Of The Knee"|"2"|"0.666667"  
"134194"|"Meloxicam 7.5 MG Oral Tablet"|"70191"|"Localized Osteoarthritis Of The Hand"|"3"|"0.6"  
"134194"|"Meloxicam 7.5 MG Oral Tablet"|"70193"|"Localized Osteoarthritis Of The Knee"|"2"|"0.333333"  
"134194"|"Meloxicam 7.5 MG Oral Tablet"|"70219"|"Osteoarthritis Of The Knee"|"6"|"0.857143"  
"134194"|"Meloxicam 7.5 MG Oral Tablet"|"70455"|"Rheumatoid Arthritis"|"15"|"0.714286"  
"134194"|"Meloxicam 7.5 MG Oral Tablet"|"70475"|"Scleroderma"|"2"|"0.4"  
"134194"|"Meloxicam 7.5 MG Oral Tablet"|"70478"|"Sjogren's Syndrome"|"3"|"0.428571"  
"134194"|"Meloxicam 7.5 MG Oral Tablet"|"70704"|"Symmetric Polyarticular Inflammation"|"2"|"0.5"  
"134194"|"Meloxicam 7.5 MG Oral Tablet"|"70706"|"Ankylosing Spondylitis"|"3"|"0.75"  
"134194"|"Meloxicam 7.5 MG Oral Tablet"|"70719"|"Psoriatic Arthropathy"|"2"|"0.4"  
"134194"|"Meloxicam 7.5 MG Oral Tablet"|"70722"|"Spondylitis"|"2"|"1"  
"134194"|"Meloxicam 7.5 MG Oral Tablet"|"73599"|"Trochanteric Bursitis"|"3"|"0.6"  
"134194"|"Meloxicam 7.5 MG Oral Tablet"|"73666"|"Backache"|"6"|"0.315789"  
"134194"|"Meloxicam 7.5 MG Oral Tablet"|"75812"|"Myalgia And Myositis"|"11"|"0.647059"  
"134194"|"Meloxicam 7.5 MG Oral Tablet"|"85614"|"Joint Pain, Localized In The Hip"|"8"|"0.615385"  
"134194"|"Meloxicam 7.5 MG Oral Tablet"|"85623"|"Joint Pain, Localized In The Knee"|"19"|"0.5"

"134194""Meloxicam 7.5 MG Oral Tablet""85638""Ankle Joint Pain""2""0.2"  
"134194""Meloxicam 7.5 MG Oral Tablet""85691""Neck Pain""4""0.666667"  
"134194""Meloxicam 7.5 MG Oral Tablet""85701""Joint Pain, Localized In The Shoulder""6""0.5"  
"134194""Meloxicam 7.5 MG Oral Tablet""90945""Joint Pain, Localized In The Right Shoulder""3""0.75"  
"134194""Meloxicam 7.5 MG Oral Tablet""90952""Joint Pain, Localized In The Left Shoulder""2""0.4"  
"134194""Meloxicam 7.5 MG Oral Tablet""91089""Lower Back Pain""8""0.5"  
"134194""Meloxicam 7.5 MG Oral Tablet""251467""Limb Pain""4""0.222222"  
"134194""Meloxicam 7.5 MG Oral Tablet""257996""Arthritis""10""0.30303"  
"134194""Meloxicam 7.5 MG Oral Tablet""278685""Arthralgias In Multiple Sites""9""0.75"  
"134194""Meloxicam 7.5 MG Oral Tablet""288921""Chronic Pain""2""0.5"  
"134194""Meloxicam 7.5 MG Oral Tablet""288977""Fibromyalgia""4""0.4"  
"134195""Opana 5 MG Oral Tablet""288921""Chronic Pain""3""1"  
"134200""Azilect 0.5 MG Oral Tablet""75019""Cerebral Degenerations, Extrapyraximal Disorders And Movement Disorders""2""1"  
"134200""Azilect 0.5 MG Oral Tablet""75080""Parkinson's Disease""11""0.55"  
"134219""Dilt-XR 180 MG Oral Capsule Extended Release 24 Hour""63467""Hypertension""2""1"  
"134226""Tandem Plus 162-115.2-1 MG Oral Capsule""173719""Anemia Of End-stage Renal Disease""2""1"  
"134226""Tandem Plus 162-115.2-1 MG Oral Capsule""278753""Anemia Of Chronic Kidney Disease""2""0.666667"  
"134226""Tandem Plus 162-115.2-1 MG Oral Capsule""278808""Breast Cancer""2""1"  
"134231""Azithromycin 1 GM Oral Packet""60928""Pain During Urination (Dysuria)""2""0.333333"  
"134231""Azithromycin 1 GM Oral Packet""65848""Chlamydia Trachomatis Urethritis""22""1"  
"134231""Azithromycin 1 GM Oral Packet""66182""Cervicitis Chlamydia Trachomatis""2""1"  
"134231""Azithromycin 1 GM Oral Packet""76934""Chlamydial Infections""9""0.818182"  
"134231""Azithromycin 1 GM Oral Packet""77894""Venereal Disease Due To Chlamydia Trachomatis""2""0.666667"  
"134231""Azithromycin 1 GM Oral Packet""77896""Lower Genitourinary Venereal Disease Due To Chlamydia Trachomatis""8""1"  
"134231""Azithromycin 1 GM Oral Packet""77898""Chlamydial Disease""4""0.666667"  
"134231""Azithromycin 1 GM Oral Packet""94408""Exposed To Venereal Disease""2""0.5"  
"134232""Cipro 250 MG/5ML (5%) Oral Suspension Reconstituted""32925""Chronic Respiratory Failure""2""0.5"  
"134232""Cipro 250 MG/5ML (5%) Oral Suspension Reconstituted""65762""Urinary Tract Infection""3""0.6"  
"134236""Fenofibrate 54 MG Oral Tablet""67970""Hyperlipidemia""4""0.5"  
"134242""Diovan HCT 320-25 MG Oral Tablet""63467""Hypertension""30""0.416667"  
"134242""Diovan HCT 320-25 MG Oral Tablet""63468""Essential Hypertension""16""0.4"  
"134242""Diovan HCT 320-25 MG Oral Tablet""63470""Benign Essential Hypertension""15""0.5"  
"134251""ProAir HFA 108 (90 Base) MCG/ACT Inhalation Aerosol Solution""60863""Difficulty Breathing (Dyspnea)""12""0.226415"  
"134251""ProAir HFA 108 (90 Base) MCG/ACT Inhalation Aerosol Solution""60869""Cough""36""0.236842"  
"134251""ProAir HFA 108 (90 Base) MCG/ACT Inhalation Aerosol Solution""60874""Wheezing""13""0.26"  
"134251""ProAir HFA 108 (90 Base) MCG/ACT Inhalation Aerosol Solution""62598""Allergic Rhinitis""16""0.0594796"  
"134251""ProAir HFA 108 (90 Base) MCG/ACT Inhalation Aerosol Solution""64118""Acute Bronchitis""75""0.539568"  
"134251""ProAir HFA 108 (90 Base) MCG/ACT Inhalation Aerosol Solution""64180""Reactive Airway Disease""33""0.52381"  
"134251""ProAir HFA 108 (90 Base) MCG/ACT Inhalation Aerosol Solution""64181""Asthma""229""0.515766"  
"134251""ProAir HFA 108 (90 Base) MCG/ACT Inhalation Aerosol Solution""64182""Mild Intermittent Asthma""6""0.428571"  
"134251""ProAir HFA 108 (90 Base) MCG/ACT Inhalation Aerosol Solution""64183""Mild Persistent Asthma""5""0.384615"  
"134251""ProAir HFA 108 (90 Base) MCG/ACT Inhalation Aerosol Solution""64184""Moderate Persistent Asthma""5""0.454545"  
"134251""ProAir HFA 108 (90 Base) MCG/ACT Inhalation Aerosol Solution""64186""Extrinsic Asthma""3""0.75"

"134251""ProAir HFA 108 (90 Base) MCG/ACT Inhalation Aerosol Solution""64190""Exercise-induced Asthma""7""0.7"

"134251""ProAir HFA 108 (90 Base) MCG/ACT Inhalation Aerosol Solution""64199""Chronic Obstructive Asthma""2""0.5"

"134251""ProAir HFA 108 (90 Base) MCG/ACT Inhalation Aerosol Solution""64202""Bronchiolitis""6""0.272727"

"134251""ProAir HFA 108 (90 Base) MCG/ACT Inhalation Aerosol Solution""64205""Chronic Obstructive Pulmonary Disease""41""0.561644"

"134251""ProAir HFA 108 (90 Base) MCG/ACT Inhalation Aerosol Solution""64206""Chronic Bronchitis""4""0.363636"

"134251""ProAir HFA 108 (90 Base) MCG/ACT Inhalation Aerosol Solution""64207""Chronic Bronchitis With Acute Exacerbation""2""0.5"

"134251""ProAir HFA 108 (90 Base) MCG/ACT Inhalation Aerosol Solution""64212""Emphysema""4""0.190476"

"134251""ProAir HFA 108 (90 Base) MCG/ACT Inhalation Aerosol Solution""64223""Bronchiectasis""3""0.5"

"134251""ProAir HFA 108 (90 Base) MCG/ACT Inhalation Aerosol Solution""64294""Pulmonary Fibrosis""2""0.25"

"134251""ProAir HFA 108 (90 Base) MCG/ACT Inhalation Aerosol Solution""67885""Bronchopulmonary Dysplasia Of Fetus Or Newborn""2""0.2"

"134251""ProAir HFA 108 (90 Base) MCG/ACT Inhalation Aerosol Solution""77890""Upper Respiratory Infection""9""0.107143"

"134251""ProAir HFA 108 (90 Base) MCG/ACT Inhalation Aerosol Solution""77891""Acute Upper Respiratory Infection""17""0.10241"

"134251""ProAir HFA 108 (90 Base) MCG/ACT Inhalation Aerosol Solution""87587""Coughing Up Sputum Yellow""6""0.75"

"134251""ProAir HFA 108 (90 Base) MCG/ACT Inhalation Aerosol Solution""111582""Auscultation Wheezing""2""0.5"

"134251""ProAir HFA 108 (90 Base) MCG/ACT Inhalation Aerosol Solution""166748""Asthma With Acute Exacerbation""9""0.209302"

"134251""ProAir HFA 108 (90 Base) MCG/ACT Inhalation Aerosol Solution""247012""Shortness Of Breath""17""0.354167"

"134251""ProAir HFA 108 (90 Base) MCG/ACT Inhalation Aerosol Solution""258831""Exercise-induced Bronchospasm""2""0.5"

"134251""ProAir HFA 108 (90 Base) MCG/ACT Inhalation Aerosol Solution""258835""Bronchitis""15""0.326087"

"134251""ProAir HFA 108 (90 Base) MCG/ACT Inhalation Aerosol Solution""277872""Asthmatic Bronchitis""5""0.714286"

"134251""ProAir HFA 108 (90 Base) MCG/ACT Inhalation Aerosol Solution""277876""Lobar Pneumonia""3""0.75"

"134251""ProAir HFA 108 (90 Base) MCG/ACT Inhalation Aerosol Solution""277914""Acute Bronchitis With Bronchospasm""7""0.7"

"134251""ProAir HFA 108 (90 Base) MCG/ACT Inhalation Aerosol Solution""297031""Intermittent Asthma""22""0.758621"

"134261""Daytrana 15 MG/9HR Transdermal Patch""275486""ADHD, Combined Type""6""0.75"

"134458""Simvastatin TABS""67970""Hyperlipidemia""4""0.142857"

"134529""Venlafaxine HCl 50 MG Oral Tablet""76351""Depression""3""0.6"

"134533""Glumetza 500 MG Oral Tablet Extended Release 24 Hour""69380""Diabetes Mellitus""3""0.125"

"134533""Glumetza 500 MG Oral Tablet Extended Release 24 Hour""69381""Type II Diabetes Mellitus""5""0.277778"

"134533""Glumetza 500 MG Oral Tablet Extended Release 24 Hour""69402""Diabetes Mellitus Poorly Controlled""8""0.5"

"134533""Glumetza 500 MG Oral Tablet Extended Release 24 Hour""69549""Polycystic Ovarian Syndrome""2""0.666667"

"134537""Venlafaxine HCl 100 MG Oral Tablet""76351""Depression""2""1"

"134538""Venlafaxine HCl 37.5 MG Oral Tablet""76351""Depression""8""0.470588"

"134538""Venlafaxine HCl 37.5 MG Oral Tablet""195794""Symptomatic Menopause""2""0.666667"

"134538""Venlafaxine HCl 37.5 MG Oral Tablet""288921""Chronic Pain""2""0.666667"

"134551"|"Venlafaxine HCl 25 MG Oral Tablet"|"195794"|"Symptomatic Menopause"|"2"|"1"

"134552"|"Venlafaxine HCl 75 MG Oral Tablet"|"61118"|"Anxiety (Symptom)"|"2"|"0.5"

"134552"|"Venlafaxine HCl 75 MG Oral Tablet"|"76351"|"Depression"|"9"|"0.428571"

"134552"|"Venlafaxine HCl 75 MG Oral Tablet"|"76357"|"Major Depression, Recurrent"|"2"|"0.4"

"134579"|"BD Ultra Fine Syringes"|"69380"|"Diabetes Mellitus"|"2"|"0.4"

"134579"|"BD Ultra Fine Syringes"|"69381"|"Type II Diabetes Mellitus"|"2"|"0.666667"

"134595"|"Focalin XR 15 MG Oral Capsule Extended Release 24 Hour"|"75819"|"ADHD, Predominantly Inattentive Type"|"2"|"1"

"134595"|"Focalin XR 15 MG Oral Capsule Extended Release 24 Hour"|"275486"|"ADHD, Combined Type"|"9"|"0.9"

"134600"|"Sertraline HCl 100 MG Oral Tablet"|"30261"|"Bipolar I Disorder, Most Recent Episode, Depressed - Severe With Psychotic Features"|"3"|"1"

"134600"|"Sertraline HCl 100 MG Oral Tablet"|"61118"|"Anxiety (Symptom)"|"16"|"0.457143"

"134600"|"Sertraline HCl 100 MG Oral Tablet"|"75080"|"Parkinson's Disease"|"2"|"0.222222"

"134600"|"Sertraline HCl 100 MG Oral Tablet"|"75354"|"Cerebral Artery Thrombosis - With Cerebral Infarction"|"2"|"0.4"

"134600"|"Sertraline HCl 100 MG Oral Tablet"|"75929"|"Mood Disorder Due To General Medical Condition"|"4"|"1"

"134600"|"Sertraline HCl 100 MG Oral Tablet"|"76232"|"Paranoid Schizophrenia"|"2"|"0.5"

"134600"|"Sertraline HCl 100 MG Oral Tablet"|"76272"|"Schizoaffective Disorder"|"4"|"0.8"

"134600"|"Sertraline HCl 100 MG Oral Tablet"|"76306"|"Episodic Mood Disorders"|"2"|"1"

"134600"|"Sertraline HCl 100 MG Oral Tablet"|"76348"|"Bipolar II Disorder"|"4"|"0.666667"

"134600"|"Sertraline HCl 100 MG Oral Tablet"|"76351"|"Depression"|"106"|"0.670886"

"134600"|"Sertraline HCl 100 MG Oral Tablet"|"76352"|"Major Depression, Single Episode"|"2"|"0.4"

"134600"|"Sertraline HCl 100 MG Oral Tablet"|"76356"|"Major Depression, Single Episode In Remission"|"2"|"1"

"134600"|"Sertraline HCl 100 MG Oral Tablet"|"76357"|"Major Depression, Recurrent"|"17"|"0.62963"

"134600"|"Sertraline HCl 100 MG Oral Tablet"|"76361"|"Moderate Recurrent Major Depression"|"2"|"0.285714"

"134600"|"Sertraline HCl 100 MG Oral Tablet"|"76363"|"Major Depression, Recurrent With Psychotic Features"|"6"|"0.75"

"134600"|"Sertraline HCl 100 MG Oral Tablet"|"76364"|"Recurrent Major Depression In Partial Remission"|"2"|"0.666667"

"134600"|"Sertraline HCl 100 MG Oral Tablet"|"76366"|"Chronic Major Depression"|"2"|"1"

"134600"|"Sertraline HCl 100 MG Oral Tablet"|"76388"|"Bipolar Disorder NOS"|"5"|"0.555556"

"134600"|"Sertraline HCl 100 MG Oral Tablet"|"76389"|"Atypical Depressive Disorder"|"2"|"0.5"

"134600"|"Sertraline HCl 100 MG Oral Tablet"|"76536"|"Generalized Anxiety Disorder"|"12"|"0.48"

"134600"|"Sertraline HCl 100 MG Oral Tablet"|"76537"|"Panic Disorder Without Agoraphobia"|"8"|"0.533333"

"134600"|"Sertraline HCl 100 MG Oral Tablet"|"76538"|"Panic Disorder With Agoraphobia"|"4"|"0.666667"

"134600"|"Sertraline HCl 100 MG Oral Tablet"|"76546"|"Obsessive Compulsive Disorder"|"9"|"0.5625"

"134600"|"Sertraline HCl 100 MG Oral Tablet"|"76587"|"Anxiety Disorder NOS"|"3"|"0.136364"

"134600"|"Sertraline HCl 100 MG Oral Tablet"|"76680"|"Adjustment Disorder With Anxiety"|"3"|"0.6"

"134600"|"Sertraline HCl 100 MG Oral Tablet"|"196089"|"Adjustment Disorder With Anxiety And Depressed Mood"|"5"|"1"

"134600"|"Sertraline HCl 100 MG Oral Tablet"|"275526"|"Severe Recurrent Major Depression Without Psychotic Features"|"2"|"1"

"134600"|"Sertraline HCl 100 MG Oral Tablet"|"275539"|"Severe Single Episode Major Depression Without Psychotic Features"|"2"|"1"

"134600"|"Sertraline HCl 100 MG Oral Tablet"|"275604"|"Depression With Anxiety"|"3"|"0.375"

"134600"|"Sertraline HCl 100 MG Oral Tablet"|"288977"|"Fibromyalgia"|"2"|"0.222222"

"134601"|"Sertraline HCl 50 MG Oral Tablet"|"61118"|"Anxiety (Symptom)"|"21"|"0.4375"

"134601"|"Sertraline HCl 50 MG Oral Tablet"|"75032"|"Vascular Dementia"|"2"|"0.666667"

"134601"|"Sertraline HCl 50 MG Oral Tablet"|"75933"|"Anxiety Disorder Due To General Medical Condition With Panic Attacks"|"2"|"0.5"

"134601"|"Sertraline HCl 50 MG Oral Tablet"|"76232"|"Paranoid Schizophrenia"|"3"|"0.6"

"134601"|"Sertraline HCl 50 MG Oral Tablet"|"76272"|"Schizoaffective Disorder"|"3"|"0.75"

"134601"|"Sertraline HCl 50 MG Oral Tablet"|"76306"|"Episodic Mood Disorders"|"5"|"0.5"

"134601"|"Sertraline HCl 50 MG Oral Tablet"|"76351"|"Depression"|"127"|"0.654639"

"134601"|"Sertraline HCl 50 MG Oral Tablet"|"76352"|"Major Depression, Single Episode"|"5"|"0.555556"  
"134601"|"Sertraline HCl 50 MG Oral Tablet"|"76357"|"Major Depression, Recurrent"|"13"|"0.722222"  
"134601"|"Sertraline HCl 50 MG Oral Tablet"|"76361"|"Moderate Recurrent Major Depression"|"2"|"0.285714"  
"134601"|"Sertraline HCl 50 MG Oral Tablet"|"76363"|"Major Depression, Recurrent With Psychotic Features"|"2"|"1"  
"134601"|"Sertraline HCl 50 MG Oral Tablet"|"76368"|"Postpartum Depression"|"5"|"0.833333"  
"134601"|"Sertraline HCl 50 MG Oral Tablet"|"76388"|"Bipolar Disorder NOS"|"7"|"0.4375"  
"134601"|"Sertraline HCl 50 MG Oral Tablet"|"76536"|"Generalized Anxiety Disorder"|"10"|"0.555556"  
"134601"|"Sertraline HCl 50 MG Oral Tablet"|"76537"|"Panic Disorder Without Agoraphobia"|"8"|"0.533333"  
"134601"|"Sertraline HCl 50 MG Oral Tablet"|"76538"|"Panic Disorder With Agoraphobia"|"3"|"0.375"  
"134601"|"Sertraline HCl 50 MG Oral Tablet"|"76546"|"Obsessive Compulsive Disorder"|"5"|"0.5"  
"134601"|"Sertraline HCl 50 MG Oral Tablet"|"76587"|"Anxiety Disorder NOS"|"11"|"0.37931"  
"134601"|"Sertraline HCl 50 MG Oral Tablet"|"76680"|"Adjustment Disorder With Anxiety"|"3"|"0.6"  
"134601"|"Sertraline HCl 50 MG Oral Tablet"|"275526"|"Severe Recurrent Major Depression Without Psychotic Features"|"3"|"0.75"  
"134601"|"Sertraline HCl 50 MG Oral Tablet"|"275592"|"Post-traumatic Stress Disorder"|"3"|"0.1875"  
"134629"|"Sertraline HCl 20 MG/ML Oral Concentrate"|"257912"|"Disorder Of Mitochondrial Metabolism"|"2"|"0.666667"  
"134658"|"Sertraline HCl 25 MG Oral Tablet"|"61118"|"Anxiety (Symptom)"|"16"|"0.372093"  
"134658"|"Sertraline HCl 25 MG Oral Tablet"|"65076"|"Irritable Bowel Syndrome"|"2"|"0.2"  
"134658"|"Sertraline HCl 25 MG Oral Tablet"|"75929"|"Mood Disorder Due To General Medical Condition"|"2"|"1"  
"134658"|"Sertraline HCl 25 MG Oral Tablet"|"75932"|"Anxiety Disorder Due To General Medical Condition With Generalized Anxiety"|"2"|"0.666667"  
"134658"|"Sertraline HCl 25 MG Oral Tablet"|"76306"|"Episodic Mood Disorders"|"5"|"0.454545"  
"134658"|"Sertraline HCl 25 MG Oral Tablet"|"76351"|"Depression"|"63"|"0.663158"  
"134658"|"Sertraline HCl 25 MG Oral Tablet"|"76352"|"Major Depression, Single Episode"|"5"|"0.454545"  
"134658"|"Sertraline HCl 25 MG Oral Tablet"|"76357"|"Major Depression, Recurrent"|"7"|"0.583333"  
"134658"|"Sertraline HCl 25 MG Oral Tablet"|"76361"|"Moderate Recurrent Major Depression"|"2"|"0.5"  
"134658"|"Sertraline HCl 25 MG Oral Tablet"|"76369"|"Postpartum Depression - Mild"|"3"|"1"  
"134658"|"Sertraline HCl 25 MG Oral Tablet"|"76388"|"Bipolar Disorder NOS"|"4"|"0.666667"  
"134658"|"Sertraline HCl 25 MG Oral Tablet"|"76536"|"Generalized Anxiety Disorder"|"8"|"0.533333"  
"134658"|"Sertraline HCl 25 MG Oral Tablet"|"76537"|"Panic Disorder Without Agoraphobia"|"7"|"0.777778"  
"134658"|"Sertraline HCl 25 MG Oral Tablet"|"76538"|"Panic Disorder With Agoraphobia"|"3"|"0.375"  
"134658"|"Sertraline HCl 25 MG Oral Tablet"|"76546"|"Obsessive Compulsive Disorder"|"3"|"0.75"  
"134658"|"Sertraline HCl 25 MG Oral Tablet"|"76587"|"Anxiety Disorder NOS"|"7"|"0.466667"  
"134658"|"Sertraline HCl 25 MG Oral Tablet"|"196089"|"Adjustment Disorder With Anxiety And Depressed Mood"|"3"|"0.6"  
"134658"|"Sertraline HCl 25 MG Oral Tablet"|"257912"|"Disorder Of Mitochondrial Metabolism"|"2"|"0.666667"  
"134658"|"Sertraline HCl 25 MG Oral Tablet"|"275496"|"Autistic Disorder"|"3"|"0.6"  
"134658"|"Sertraline HCl 25 MG Oral Tablet"|"275592"|"Post-traumatic Stress Disorder"|"5"|"0.555556"  
"134658"|"Sertraline HCl 25 MG Oral Tablet"|"275604"|"Depression With Anxiety"|"3"|"0.5"  
"134754"|"Aranesp (Albumin Free) 25 MCG/ML Injection Solution"|"278753"|"Anemia Of Chronic Kidney Disease"|"2"|"0.666667"  
"134778"|"Advair HFA 230-21 MCG/ACT Inhalation Aerosol"|"64181"|"Asthma"|"6"|"0.545455"  
"134787"|"Advair HFA 115-21 MCG/ACT Inhalation Aerosol"|"64181"|"Asthma"|"11"|"0.44"  
"134794"|"Advair HFA 45-21 MCG/ACT Inhalation Aerosol"|"64181"|"Asthma"|"5"|"1"  
"134830"|"Tdap"|"251015"|"Vaccines Prophylactic Need Against Td"|"2"|"1"  
"134897"|"Quasense 0.15-0.03 MG Oral Tablet"|"250989"|"Oral Contraceptives"|"3"|"1"  
"134922"|"Pilocarpine HCl 7.5 MG Oral Tablet"|"70478"|"Sjogren's Syndrome"|"2"|"0.666667"  
"134968"|"Oxygen"|"32925"|"Chronic Respiratory Failure"|"2"|"0.5"  
"134968"|"Oxygen"|"60863"|"Difficulty Breathing (Dyspnea)"|"4"|"0.285714"  
"134968"|"Oxygen"|"63484"|"Pulmonary Hypertension"|"7"|"0.368421"  
"134968"|"Oxygen"|"63485"|"Primary Pulmonary Hypertension"|"2"|"1"  
"134968"|"Oxygen"|"63488"|"Secondary Pulmonary Hypertension"|"2"|"0.285714"  
"134968"|"Oxygen"|"64181"|"Asthma"|"5"|"0.263158"

"134968"|"Oxygen"|"64205"|"Chronic Obstructive Pulmonary Disease"|"11"|"0.366667"  
"134968"|"Oxygen"|"64212"|"Emphysema"|"5"|"0.555556"  
"134968"|"Oxygen"|"64294"|"Pulmonary Fibrosis"|"4"|"0.333333"  
"134968"|"Oxygen"|"68082"|"Hypoxia"|"12"|"0.444444"  
"134968"|"Oxygen"|"70475"|"Scleroderma"|"2"|"0.285714"  
"134968"|"Oxygen"|"70477"|"Scleroderma With Pulmonary Involvement"|"2"|"0.5"  
"134968"|"Oxygen"|"74552"|"Cluster Headache"|"2"|"1"  
"134968"|"Oxygen"|"173466"|"Obstructive Sleep Apnea"|"3"|"0.2"  
"134968"|"Oxygen"|"247012"|"Shortness Of Breath"|"3"|"0.3"  
"134968"|"Oxygen"|"277913"|"Chronic Interstitial Lung Disease"|"3"|"1"  
"135067"|"Bromatan Plus 45-3.5-30 MG/5ML Oral Suspension"|"77891"|"Acute Upper Respiratory Infection"|"2"|"1"  
"135069"|"Ranitidine HCl 15 MG/ML Oral Syrup"|"62785"|"Laryngomalacia"|"2"|"0.222222"  
"135069"|"Ranitidine HCl 15 MG/ML Oral Syrup"|"64688"|"Esophageal Reflux"|"42"|"0.6"  
"135069"|"Ranitidine HCl 15 MG/ML Oral Syrup"|"87736"|"Abdominal Pain In The Central Upper Belly (Epigastric)"|"2"|"1"  
"135069"|"Ranitidine HCl 15 MG/ML Oral Syrup"|"292064"|"Dysphagia"|"3"|"0.176471"  
"135135"|"Claritin 5 MG Oral Tablet Chewable"|"62598"|"Allergic Rhinitis"|"15"|"0.46875"  
"135172"|"Januvia 100 MG Oral Tablet"|"69380"|"Diabetes Mellitus"|"34"|"0.295652"  
"135172"|"Januvia 100 MG Oral Tablet"|"69381"|"Type II Diabetes Mellitus"|"21"|"0.396226"  
"135172"|"Januvia 100 MG Oral Tablet"|"69382"|"Type II Diabetes Mellitus - Uncomplicated, Uncontrolled"|"3"|"0.230769"  
"135172"|"Januvia 100 MG Oral Tablet"|"69401"|"Diabetes Mellitus Under Control"|"6"|"1"  
"135172"|"Januvia 100 MG Oral Tablet"|"69402"|"Diabetes Mellitus Poorly Controlled"|"22"|"0.4"  
"135177"|"Metoclopramide HCl 10 MG/10ML Oral Solution"|"64688"|"Esophageal Reflux"|"5"|"0.833333"  
"135179"|"Reyataz 300 MG Oral Capsule"|"76835"|"HIV Infection"|"40"|"0.816327"  
"135179"|"Reyataz 300 MG Oral Capsule"|"76842"|"Acquired Immunodeficiency Syndrome (AIDS)"|"10"|"0.555556"  
"135180"|"Travatan Z 0.004 % Ophthalmic Solution"|"62066"|"Glaucoma"|"6"|"0.352941"  
"135184"|"Femcon Fe 0.4-35 MG-MCG Oral Tablet Chewable"|"250989"|"Oral Contraceptives"|"2"|"0.4"  
"135188"|"HumaLOG Mix 50/50 50-50 % Subcutaneous Suspension"|"69402"|"Diabetes Mellitus Poorly Controlled"|"2"|"1"  
"135194"|"Dilt-XR 240 MG Oral Capsule Extended Release 24 Hour"|"63467"|"Hypertension"|"2"|"0.666667"  
"135194"|"Dilt-XR 240 MG Oral Capsule Extended Release 24 Hour"|"63468"|"Essential Hypertension"|"3"|"0.75"  
"135219"|"Potassium Chloride 20 MEQ/15ML (10%) Oral Solution"|"68089"|"Hypokalemia"|"2"|"0.666667"  
"135225"|"Januvia 25 MG Oral Tablet"|"69380"|"Diabetes Mellitus"|"3"|"0.272727"  
"135225"|"Januvia 25 MG Oral Tablet"|"69381"|"Type II Diabetes Mellitus"|"2"|"0.4"  
"135225"|"Januvia 25 MG Oral Tablet"|"69402"|"Diabetes Mellitus Poorly Controlled"|"3"|"0.5"  
"135235"|"Metoclopramide HCl 5 MG/5ML Oral Solution"|"60895"|"Vomiting (Symptom)"|"4"|"0.4"  
"135235"|"Metoclopramide HCl 5 MG/5ML Oral Solution"|"64688"|"Esophageal Reflux"|"17"|"0.435897"  
"135235"|"Metoclopramide HCl 5 MG/5ML Oral Solution"|"64748"|"Gastroparesis"|"3"|"0.3"  
"135235"|"Metoclopramide HCl 5 MG/5ML Oral Solution"|"257912"|"Disorder Of Mitochondrial Metabolism"|"2"|"0.285714"  
"135264"|"Januvia 50 MG Oral Tablet"|"65712"|"Diabetic Nephropathy Type II - Uncontrolled"|"3"|"0.75"  
"135264"|"Januvia 50 MG Oral Tablet"|"69380"|"Diabetes Mellitus"|"12"|"0.27907"  
"135264"|"Januvia 50 MG Oral Tablet"|"69381"|"Type II Diabetes Mellitus"|"5"|"0.238095"  
"135264"|"Januvia 50 MG Oral Tablet"|"69402"|"Diabetes Mellitus Poorly Controlled"|"7"|"0.388889"  
"135341"|"Invega 9 MG Oral Tablet Extended Release 24 Hour"|"76272"|"Schizo affective Disorder"|"5"|"1"  
"135372"|"AquADEKs Oral Liquid"|"67695"|"Cystic Fibrosis"|"2"|"1"  
"135415"|"Budeprion XL 300 MG Oral Tablet Extended Release 24 Hour"|"76351"|"Depression"|"9"|"0.6"  
"135415"|"Budeprion XL 300 MG Oral Tablet Extended Release 24 Hour"|"76357"|"Major Depression, Recurrent"|"2"|"1"  
"135415"|"Budeprion XL 300 MG Oral Tablet Extended Release 24 Hour"|"76359"|"Major Depression, Recurrent With Melancholia"|"3"|"1"  
"135415"|"Budeprion XL 300 MG Oral Tablet Extended Release 24 Hour"|"76388"|"Bipolar Disorder NOS"|"2"|"1"  
"135422"|"Mefenamic Acid 250 MG Oral Capsule"|"66133"|"Dysmenorrhea"|"6"|"0.857143"

"135441"|"Ondansetron 4 MG Oral Tablet Dispersible"|"60894"|"Nausea (Symptom)"|"18"|"0.857143"  
"135441"|"Ondansetron 4 MG Oral Tablet Dispersible"|"60895"|"Vomiting (Symptom)"|"4"|"0.444444"  
"135441"|"Ondansetron 4 MG Oral Tablet Dispersible"|"60899"|"Abdominal Pain"|"2"|"0.2"  
"135441"|"Ondansetron 4 MG Oral Tablet Dispersible"|"64610"|"Viral Gastroenteritis"|"2"|"0.5"  
"135441"|"Ondansetron 4 MG Oral Tablet Dispersible"|"69387"|"Type I Diabetes Mellitus"|"2"|"0.5"  
"135441"|"Ondansetron 4 MG Oral Tablet Dispersible"|"87702"|"Nausea With Vomiting"|"9"|"0.692308"  
"135444"|"Megestrol Acetate 800 MG/20ML Oral Suspension"|"76835"|"HIV Infection"|"2"|"1"  
"135445"|"Oxybutynin Chloride 5 MG Oral Tablet Extended Release 24 Hour"|"65769"|"Neurogenic  
Bladder"|"5"|"0.714286"  
"135445"|"Oxybutynin Chloride 5 MG Oral Tablet Extended Release 24 Hour"|"65777"|"Urge Incontinence Of  
Urine"|"2"|"0.5"  
"135445"|"Oxybutynin Chloride 5 MG Oral Tablet Extended Release 24 Hour"|"87904"|"Feelings Of Urinary  
Urgency"|"2"|"0.5"  
"135445"|"Oxybutynin Chloride 5 MG Oral Tablet Extended Release 24 Hour"|"296638"|"Urinary  
Incontinence"|"4"|"0.5"  
"135464"|"Ondansetron HCl 4 MG Oral Tablet"|"60894"|"Nausea (Symptom)"|"28"|"0.777778"  
"135464"|"Ondansetron HCl 4 MG Oral Tablet"|"60895"|"Vomiting (Symptom)"|"4"|"0.8"  
"135464"|"Ondansetron HCl 4 MG Oral Tablet"|"64579"|"Gastroenteritis"|"3"|"0.5"  
"135464"|"Ondansetron HCl 4 MG Oral Tablet"|"66394"|"Hyperemesis Gravidarum"|"3"|"0.75"  
"135464"|"Ondansetron HCl 4 MG Oral Tablet"|"69402"|"Diabetes Mellitus Poorly Controlled"|"3"|"0.375"  
"135464"|"Ondansetron HCl 4 MG Oral Tablet"|"87702"|"Nausea With Vomiting"|"18"|"0.782609"  
"135464"|"Ondansetron HCl 4 MG Oral Tablet"|"252601"|"Vertigo"|"2"|"0.666667"  
"135486"|"Ondansetron HCl 8 MG Oral Tablet"|"60894"|"Nausea (Symptom)"|"18"|"0.818182"  
"135486"|"Ondansetron HCl 8 MG Oral Tablet"|"64579"|"Gastroenteritis"|"2"|"0.5"  
"135486"|"Ondansetron HCl 8 MG Oral Tablet"|"79148"|"Malignant Pancreatic Neoplasm"|"2"|"0.666667"  
"135486"|"Ondansetron HCl 8 MG Oral Tablet"|"80830"|"Malignant Neoplasm Of The Prostate Gland"|"3"|"1"  
"135486"|"Ondansetron HCl 8 MG Oral Tablet"|"80831"|"Adenocarcinoma Of The Prostate Gland"|"2"|"0.5"  
"135486"|"Ondansetron HCl 8 MG Oral Tablet"|"80847"|"Renal Cell Carcinoma"|"6"|"0.666667"  
"135486"|"Ondansetron HCl 8 MG Oral Tablet"|"81092"|"Non-Hodgkin's Lymphoma"|"2"|"1"  
"135486"|"Ondansetron HCl 8 MG Oral Tablet"|"87702"|"Nausea With Vomiting"|"15"|"0.833333"  
"135486"|"Ondansetron HCl 8 MG Oral Tablet"|"167038"|"Transitional Cell Carcinoma Of The Bladder"|"3"|"0.75"  
"135486"|"Ondansetron HCl 8 MG Oral Tablet"|"181372"|"Renal Carcinoma"|"2"|"0.5"  
"135486"|"Ondansetron HCl 8 MG Oral Tablet"|"260898"|"Kidney Cancer"|"2"|"0.666667"  
"135486"|"Ondansetron HCl 8 MG Oral Tablet"|"274406"|"Pregnancy Test Positive"|"2"|"0.333333"  
"135486"|"Ondansetron HCl 8 MG Oral Tablet"|"276378"|"Vomiting During Pregnancy"|"3"|"1"  
"135486"|"Ondansetron HCl 8 MG Oral Tablet"|"278781"|"Lung Cancer"|"2"|"0.333333"  
"135486"|"Ondansetron HCl 8 MG Oral Tablet"|"278808"|"Breast Cancer"|"3"|"0.1875"  
"135486"|"Ondansetron HCl 8 MG Oral Tablet"|"278812"|"Prostate Cancer"|"17"|"0.809524"  
"135486"|"Ondansetron HCl 8 MG Oral Tablet"|"283136"|"Bladder Cancer"|"2"|"0.333333"  
"135515"|"Metoprolol Succinate 25 MG Oral Tablet Extended Release 24 Hour"|"60854"|"Palpitations  
(Symptom)"|"3"|"0.176471"  
"135515"|"Metoprolol Succinate 25 MG Oral Tablet Extended Release 24 Hour"|"62902"|"Supraventricular  
Tachycardia"|"3"|"0.272727"  
"135515"|"Metoprolol Succinate 25 MG Oral Tablet Extended Release 24 Hour"|"62904"|"Paroxysmal Supraventricular  
Tachycardia"|"2"|"1"  
"135515"|"Metoprolol Succinate 25 MG Oral Tablet Extended Release 24 Hour"|"62916"|"Atrial  
Fibrillation"|"19"|"0.197917"  
"135515"|"Metoprolol Succinate 25 MG Oral Tablet Extended Release 24 Hour"|"62947"|"Ventricular  
Tachycardia"|"2"|"0.2"  
"135515"|"Metoprolol Succinate 25 MG Oral Tablet Extended Release 24 Hour"|"62975"|"Coronary Artery  
Disease"|"41"|"0.186364"  
"135515"|"Metoprolol Succinate 25 MG Oral Tablet Extended Release 24 Hour"|"62987"|"Angina Pectoris"|"3"|"0.2"  
"135515"|"Metoprolol Succinate 25 MG Oral Tablet Extended Release 24 Hour"|"63148"|"2-vessel Coronary Artery  
Stenosis"|"3"|"0.230769"

"135515"|"Metoprolol Succinate 25 MG Oral Tablet Extended Release 24 Hour"|"63173"|"Cardiomyopathy"|"2"|"0.2"  
"135515"|"Metoprolol Succinate 25 MG Oral Tablet Extended Release 24 Hour"|"63174"|"Dilated  
Cardiomyopathy"|"3"|"0.272727"  
"135515"|"Metoprolol Succinate 25 MG Oral Tablet Extended Release 24 Hour"|"63217"|"Congestive Heart  
Failure"|"16"|"0.210526"  
"135515"|"Metoprolol Succinate 25 MG Oral Tablet Extended Release 24  
Hour"|"63467"|"Hypertension"|"162"|"0.347639"  
"135515"|"Metoprolol Succinate 25 MG Oral Tablet Extended Release 24 Hour"|"63468"|"Essential  
Hypertension"|"80"|"0.454545"  
"135515"|"Metoprolol Succinate 25 MG Oral Tablet Extended Release 24 Hour"|"63470"|"Benign Essential  
Hypertension"|"64"|"0.457143"  
"135515"|"Metoprolol Succinate 25 MG Oral Tablet Extended Release 24 Hour"|"250579"|"Blood Pressure Isolated  
Elevated"|"3"|"0.1875"  
"135515"|"Metoprolol Succinate 25 MG Oral Tablet Extended Release 24 Hour"|"250864"|"Diastolic Congestive Heart  
Failure"|"2"|"0.5"  
"135515"|"Metoprolol Succinate 25 MG Oral Tablet Extended Release 24 Hour"|"282269"|"Tachycardia"|"3"|"0.3"  
"135515"|"Metoprolol Succinate 25 MG Oral Tablet Extended Release 24  
Hour"|"282270"|"Palpitations"|"18"|"0.276923"  
"135522"|"Allegra 30 MG/5ML SUSP"|"62598"|"Allergic Rhinitis"|"18"|"0.62069"  
"135522"|"Allegra 30 MG/5ML SUSP"|"64181"|"Asthma"|"3"|"0.111111"  
"135522"|"Allegra 30 MG/5ML SUSP"|"93702"|"Allergies"|"2"|"0.2"  
"135544"|"Invega 6 MG Oral Tablet Extended Release 24 Hour"|"76272"|"Schizo affective Disorder"|"2"|"1"  
"135555"|"AquADEKs Oral Capsule"|"67695"|"Cystic Fibrosis"|"2"|"1"  
"135590"|"MetroNIDAZOLE 0.75 % Vaginal Gel"|"66213"|"Vaginitis"|"14"|"0.341463"  
"135590"|"MetroNIDAZOLE 0.75 % Vaginal Gel"|"288761"|"Vaginal Discharge"|"8"|"0.307692"  
"135590"|"MetroNIDAZOLE 0.75 % Vaginal Gel"|"288790"|"Bacterial Vaginosis"|"111"|"0.810219"  
"135598"|"Oxybutynin Chloride 15 MG Oral Tablet Extended Release 24 Hour"|"65769"|"Neurogenic  
Bladder"|"4"|"0.666667"  
"135601"|"Tysabri 300 MG/15ML Intravenous Concentrate"|"75125"|"Multiple Sclerosis"|"3"|"0.214286"  
"135605"|"Ondansetron 8 MG Oral Tablet Dispersible"|"60894"|"Nausea (Symptom)"|"12"|"0.631579"  
"135605"|"Ondansetron 8 MG Oral Tablet Dispersible"|"64621"|"Infectious Gastroenteritis"|"2"|"1"  
"135605"|"Ondansetron 8 MG Oral Tablet Dispersible"|"87702"|"Nausea With Vomiting"|"5"|"0.625"  
"135605"|"Ondansetron 8 MG Oral Tablet Dispersible"|"274406"|"Pregnancy Test Positive"|"4"|"0.363636"  
"135619"|"Oxybutynin Chloride 10 MG Oral Tablet Extended Release 24 Hour"|"65777"|"Urge Incontinence Of  
Urine"|"6"|"0.75"  
"135619"|"Oxybutynin Chloride 10 MG Oral Tablet Extended Release 24 Hour"|"65778"|"Urge And Stress  
Incontinence"|"2"|"0.5"  
"135619"|"Oxybutynin Chloride 10 MG Oral Tablet Extended Release 24 Hour"|"75125"|"Multiple Sclerosis"|"2"|"0.4"  
"135619"|"Oxybutynin Chloride 10 MG Oral Tablet Extended Release 24 Hour"|"296638"|"Urinary  
Incontinence"|"2"|"0.333333"  
"135856"|"Lialda 1.2 GM Oral Tablet Delayed Release"|"296627"|"Colitis"|"2"|"1"  
"135882"|"Omnitrope 5.8 MG Subcutaneous Solution Reconstituted"|"292025"|"Short Stature"|"2"|"1"  
"135892"|"Pataday 0.2 % Ophthalmic Solution"|"61417"|"Conjunctivitis"|"10"|"0.666667"  
"135892"|"Pataday 0.2 % Ophthalmic Solution"|"61428"|"Acute Viral Conjunctivitis"|"2"|"1"  
"135892"|"Pataday 0.2 % Ophthalmic Solution"|"61433"|"Chronic Allergic Conjunctivitis"|"6"|"0.6"  
"135892"|"Pataday 0.2 % Ophthalmic Solution"|"61463"|"Conjunctivitis In Both Eyes"|"3"|"0.75"  
"135892"|"Pataday 0.2 % Ophthalmic Solution"|"62598"|"Allergic Rhinitis"|"21"|"0.344262"  
"135989"|"CPAP Continuous Positive Airway Pressure"|"76406"|"Sleep Apnea"|"8"|"0.470588"  
"135989"|"CPAP Continuous Positive Airway Pressure"|"76408"|"Adult Sleep Apnea"|"5"|"0.5"  
"135989"|"CPAP Continuous Positive Airway Pressure"|"173466"|"Obstructive Sleep Apnea"|"66"|"0.709677"  
"135991"|"Topamax Sprinkle 25 MG Oral Capsule Sprinkle"|"74988"|"Seizure Disorder"|"5"|"0.5"  
"135991"|"Topamax Sprinkle 25 MG Oral Capsule Sprinkle"|"252570"|"Partial Complex Seizure With Secondary  
Generalization With Intractable Seizure"|"2"|"0.666667"  
"136004"|"OB Complete with DHA 28-1.25-200 MG CAPS"|"69549"|"Polycystic Ovarian Syndrome"|"3"|"0.5"

"136004"|"OB Complete with DHA 28-1.25-200 MG CAPS"|"274406"|"Pregnancy Test Positive"|"2"|"0.666667"  
"136059"|"FentaNYL 12 MCG/HR Transdermal Patch 72 Hour"|"31947"|"Lumbago"|"2"|"1"  
"136059"|"FentaNYL 12 MCG/HR Transdermal Patch 72 Hour"|"91089"|"Lower Back Pain"|"2"|"1"  
"136059"|"FentaNYL 12 MCG/HR Transdermal Patch 72 Hour"|"288921"|"Chronic Pain"|"2"|"0.666667"  
"136088"|"Coreg CR 20 MG Oral Capsule Extended Release 24 Hour"|"63467"|"Hypertension"|"4"|"0.235294"  
"136088"|"Coreg CR 20 MG Oral Capsule Extended Release 24 Hour"|"63468"|"Essential  
Hypertension"|"3"|"0.428571"  
"136088"|"Coreg CR 20 MG Oral Capsule Extended Release 24 Hour"|"63470"|"Benign Essential  
Hypertension"|"3"|"0.428571"  
"136095"|"Guaifenesin-Codeine 100-10 MG/5ML Oral Solution"|"60869"|"Cough"|"3"|"0.428571"  
"136095"|"Guaifenesin-Codeine 100-10 MG/5ML Oral Solution"|"64118"|"Acute Bronchitis"|"5"|"0.625"  
"136095"|"Guaifenesin-Codeine 100-10 MG/5ML Oral Solution"|"77890"|"Upper Respiratory  
Infection"|"2"|"0.666667"  
"136095"|"Guaifenesin-Codeine 100-10 MG/5ML Oral Solution"|"77891"|"Acute Upper Respiratory  
Infection"|"14"|"0.777778"  
"136095"|"Guaifenesin-Codeine 100-10 MG/5ML Oral Solution"|"258835"|"Bronchitis"|"2"|"0.666667"  
"136127"|"MethylPREDNISolone Sodium Succ 1 GM Injection Solution Reconstituted"|"75125"|"Multiple  
Sclerosis"|"11"|"0.578947"  
"136127"|"MethylPREDNISolone Sodium Succ 1 GM Injection Solution Reconstituted"|"75127"|"Devic  
Disease"|"3"|"1"  
"136139"|"Colestipol HCl 1 GM Oral Tablet"|"67970"|"Hyperlipidemia"|"2"|"1"  
"136140"|"Guaifenesin-Codeine 300-10 MG/5ML Oral Liquid"|"60869"|"Cough"|"12"|"0.857143"  
"136140"|"Guaifenesin-Codeine 300-10 MG/5ML Oral Liquid"|"64118"|"Acute Bronchitis"|"3"|"0.5"  
"136140"|"Guaifenesin-Codeine 300-10 MG/5ML Oral Liquid"|"77891"|"Acute Upper Respiratory  
Infection"|"14"|"0.823529"  
"136143"|"AmLODIPine Besylate 2.5 MG Oral Tablet"|"63232"|"Benign Hypertensive Heart Disease"|"2"|"1"  
"136143"|"AmLODIPine Besylate 2.5 MG Oral Tablet"|"63467"|"Hypertension"|"52"|"0.460177"  
"136143"|"AmLODIPine Besylate 2.5 MG Oral Tablet"|"63468"|"Essential Hypertension"|"25"|"0.5"  
"136143"|"AmLODIPine Besylate 2.5 MG Oral Tablet"|"63470"|"Benign Essential Hypertension"|"25"|"0.510204"  
"136143"|"AmLODIPine Besylate 2.5 MG Oral Tablet"|"63758"|"Raynaud's Disease"|"13"|"0.65"  
"136143"|"AmLODIPine Besylate 2.5 MG Oral Tablet"|"63759"|"Raynaud's Phenomenon"|"9"|"0.9"  
"136143"|"AmLODIPine Besylate 2.5 MG Oral Tablet"|"70472"|"Systemic Lupus Erythematosus"|"2"|"0.333333"  
"136143"|"AmLODIPine Besylate 2.5 MG Oral Tablet"|"70475"|"Scleroderma"|"6"|"0.272727"  
"136143"|"AmLODIPine Besylate 2.5 MG Oral Tablet"|"70476"|"CREST Syndrome"|"4"|"0.666667"  
"136160"|"Coreg CR 80 MG Oral Capsule Extended Release 24 Hour"|"63468"|"Essential  
Hypertension"|"2"|"0.333333"  
"136187"|"Topamax Sprinkle 15 MG Oral Capsule Sprinkle"|"74988"|"Seizure Disorder"|"2"|"0.333333"  
"136190"|"Coreg CR 40 MG Oral Capsule Extended Release 24 Hour"|"63467"|"Hypertension"|"4"|"0.222222"  
"136190"|"Coreg CR 40 MG Oral Capsule Extended Release 24 Hour"|"63468"|"Essential  
Hypertension"|"3"|"0.333333"  
"136190"|"Coreg CR 40 MG Oral Capsule Extended Release 24 Hour"|"63470"|"Benign Essential  
Hypertension"|"2"|"0.5"  
"136200"|"Hydrochlorothiazide 12.5 MG Oral Tablet"|"63217"|"Congestive Heart Failure"|"3"|"0.125"  
"136200"|"Hydrochlorothiazide 12.5 MG Oral Tablet"|"63467"|"Hypertension"|"92"|"0.412556"  
"136200"|"Hydrochlorothiazide 12.5 MG Oral Tablet"|"63468"|"Essential Hypertension"|"47"|"0.505376"  
"136200"|"Hydrochlorothiazide 12.5 MG Oral Tablet"|"63470"|"Benign Essential Hypertension"|"62"|"0.639175"  
"136200"|"Hydrochlorothiazide 12.5 MG Oral Tablet"|"65662"|"Nephrolithiasis"|"3"|"0.375"  
"136200"|"Hydrochlorothiazide 12.5 MG Oral Tablet"|"155099"|"Lower Leg Localized Swelling"|"2"|"0.2"  
"136200"|"Hydrochlorothiazide 12.5 MG Oral Tablet"|"155100"|"Lower Leg Localized Swelling  
Bilateral"|"6"|"0.352941"  
"136200"|"Hydrochlorothiazide 12.5 MG Oral Tablet"|"250579"|"Blood Pressure Isolated Elevated"|"7"|"0.21875"  
"136200"|"Hydrochlorothiazide 12.5 MG Oral Tablet"|"282327"|"Prehypertension"|"3"|"0.375"  
"136200"|"Hydrochlorothiazide 12.5 MG Oral Tablet"|"282680"|"Edema"|"3"|"0.5"  
"136224"|"Enbrel 25 MG/0.5ML Subcutaneous Solution"|"70455"|"Rheumatoid Arthritis"|"3"|"0.75"

"136267"|"Tekturna 150 MG Oral Tablet"|"34588"|"Proteinuria"|"4"|"0.363636"  
"136267"|"Tekturna 150 MG Oral Tablet"|"63467"|"Hypertension"|"4"|"0.148148"  
"136267"|"Tekturna 150 MG Oral Tablet"|"63468"|"Essential Hypertension"|"4"|"0.4"  
"136267"|"Tekturna 150 MG Oral Tablet"|"63470"|"Benign Essential Hypertension"|"5"|"0.625"  
"136267"|"Tekturna 150 MG Oral Tablet"|"274606"|"Chronic Kidney Disease, Stage 3"|"3"|"0.272727"  
"136270"|"Coreg CR 10 MG Oral Capsule Extended Release 24 Hour"|"63467"|"Hypertension"|"3"|"0.230769"  
"136270"|"Coreg CR 10 MG Oral Capsule Extended Release 24 Hour"|"63468"|"Essential Hypertension"|"3"|"0.3"  
"136272"|"MyKidz Iron 10 MG/2ML Oral Suspension"|"77962"|"Anemia"|"3"|"1"  
"136285"|"Guaifenesin-Codeine 100-10 MG/5ML Oral Syrup"|"60869"|"Cough"|"10"|"0.454545"  
"136285"|"Guaifenesin-Codeine 100-10 MG/5ML Oral Syrup"|"62577"|"Sinusitis"|"3"|"0.5"  
"136285"|"Guaifenesin-Codeine 100-10 MG/5ML Oral Syrup"|"64118"|"Acute Bronchitis"|"16"|"0.64"  
"136285"|"Guaifenesin-Codeine 100-10 MG/5ML Oral Syrup"|"64126"|"Pneumonia"|"2"|"0.4"  
"136285"|"Guaifenesin-Codeine 100-10 MG/5ML Oral Syrup"|"76702"|"Viral Infection"|"3"|"0.6"  
"136285"|"Guaifenesin-Codeine 100-10 MG/5ML Oral Syrup"|"77890"|"Upper Respiratory Infection"|"4"|"0.307692"  
"136285"|"Guaifenesin-Codeine 100-10 MG/5ML Oral Syrup"|"77891"|"Acute Upper Respiratory Infection"|"7"|"0.318182"  
"136285"|"Guaifenesin-Codeine 100-10 MG/5ML Oral Syrup"|"258832"|"Cough Variant Asthma"|"3"|"0.3"  
"136285"|"Guaifenesin-Codeine 100-10 MG/5ML Oral Syrup"|"277872"|"Asthmatic Bronchitis"|"2"|"1"  
"136288"|"Ciprofloxacin-Ciproflo HCl 500 MG Oral Tablet Extended Release 24 Hour"|"65762"|"Urinary Tract Infection"|"2"|"0.4"  
"136318"|"Benzoyl Peroxide Creamy Wash 4 % LIQD"|"69606"|"Acne"|"2"|"1"  
"136323"|"NexIUM 40 MG Oral Packet"|"64680"|"Chronic Reflux Esophagitis"|"3"|"0.5"  
"136323"|"NexIUM 40 MG Oral Packet"|"64688"|"Esophageal Reflux"|"8"|"0.444444"  
"136324"|"NexIUM 20 MG Oral Packet"|"60899"|"Abdominal Pain"|"4"|"0.666667"  
"136324"|"NexIUM 20 MG Oral Packet"|"64688"|"Esophageal Reflux"|"14"|"0.736842"  
"136336"|"Beconase AQ 42 MCG/SPRAY Nasal Suspension"|"62598"|"Allergic Rhinitis"|"8"|"0.888889"  
"136377"|"Tekturna 300 MG Oral Tablet"|"34588"|"Proteinuria"|"3"|"0.375"  
"136377"|"Tekturna 300 MG Oral Tablet"|"63467"|"Hypertension"|"10"|"0.4"  
"136377"|"Tekturna 300 MG Oral Tablet"|"63468"|"Essential Hypertension"|"5"|"0.384615"  
"136377"|"Tekturna 300 MG Oral Tablet"|"63470"|"Benign Essential Hypertension"|"2"|"0.285714"  
"136377"|"Tekturna 300 MG Oral Tablet"|"274606"|"Chronic Kidney Disease, Stage 3"|"2"|"0.333333"  
"136409"|"AmLODIPine Besylate 5 MG Oral Tablet"|"63467"|"Hypertension"|"315"|"0.411765"  
"136409"|"AmLODIPine Besylate 5 MG Oral Tablet"|"63468"|"Essential Hypertension"|"160"|"0.528053"  
"136409"|"AmLODIPine Besylate 5 MG Oral Tablet"|"63470"|"Benign Essential Hypertension"|"200"|"0.588235"  
"136409"|"AmLODIPine Besylate 5 MG Oral Tablet"|"63471"|"Accelerated Essential Hypertension"|"6"|"0.6"  
"136409"|"AmLODIPine Besylate 5 MG Oral Tablet"|"63758"|"Raynaud's Disease"|"27"|"0.771429"  
"136409"|"AmLODIPine Besylate 5 MG Oral Tablet"|"63759"|"Raynaud's Phenomenon"|"9"|"0.529412"  
"136409"|"AmLODIPine Besylate 5 MG Oral Tablet"|"70475"|"Scleroderma"|"14"|"0.269231"  
"136409"|"AmLODIPine Besylate 5 MG Oral Tablet"|"70477"|"Scleroderma With Pulmonary Involvement"|"2"|"1"  
"136409"|"AmLODIPine Besylate 5 MG Oral Tablet"|"250579"|"Blood Pressure Isolated Elevated"|"8"|"0.242424"  
"136409"|"AmLODIPine Besylate 5 MG Oral Tablet"|"270715"|"ACP Staging Stage 2 Hypertension: Greater Than Or = 160/100"|"3"|"0.375"  
"136417"|"AmLODIPine Besylate 10 MG Oral Tablet"|"63232"|"Benign Hypertensive Heart Disease"|"2"|"0.5"  
"136417"|"AmLODIPine Besylate 10 MG Oral Tablet"|"63467"|"Hypertension"|"375"|"0.417595"  
"136417"|"AmLODIPine Besylate 10 MG Oral Tablet"|"63468"|"Essential Hypertension"|"184"|"0.539589"  
"136417"|"AmLODIPine Besylate 10 MG Oral Tablet"|"63470"|"Benign Essential Hypertension"|"219"|"0.58871"  
"136417"|"AmLODIPine Besylate 10 MG Oral Tablet"|"63471"|"Accelerated Essential Hypertension"|"9"|"0.473684"  
"136417"|"AmLODIPine Besylate 10 MG Oral Tablet"|"63758"|"Raynaud's Disease"|"10"|"0.588235"  
"136417"|"AmLODIPine Besylate 10 MG Oral Tablet"|"63759"|"Raynaud's Phenomenon"|"2"|"0.333333"  
"136417"|"AmLODIPine Besylate 10 MG Oral Tablet"|"65689"|"Nephrosclerosis With Benign Hypertension"|"2"|"0.25"  
"136417"|"AmLODIPine Besylate 10 MG Oral Tablet"|"69660"|"Chronic Cutaneous Ulcer"|"3"|"0.25"  
"136417"|"AmLODIPine Besylate 10 MG Oral Tablet"|"70475"|"Scleroderma"|"8"|"0.307692"  
"136417"|"AmLODIPine Besylate 10 MG Oral Tablet"|"70477"|"Scleroderma With Pulmonary Involvement"|"2"|"0.5"

"136417"|"AmLODIPine Besylate 10 MG Oral Tablet"|"250579"|"Blood Pressure Isolated Elevated"|"5"|"0.294118"  
"136417"|"AmLODIPine Besylate 10 MG Oral Tablet"|"270712"|"ACP Staging Stage 1 Hypertension: 140-159 / 90-99"|"2"|"0.2"  
"136417"|"AmLODIPine Besylate 10 MG Oral Tablet"|"270715"|"ACP Staging Stage 2 Hypertension: Greater Than Or = 160/100"|"3"|"0.3"  
"136417"|"AmLODIPine Besylate 10 MG Oral Tablet"|"274689"|"Chronic Kidney Disease With Benign Hypertension"|"4"|"0.444444"  
"136725"|"Janumet 50-500 MG Oral Tablet"|"69380"|"Diabetes Mellitus"|"8"|"0.285714"  
"136725"|"Janumet 50-500 MG Oral Tablet"|"69381"|"Type II Diabetes Mellitus"|"8"|"0.470588"  
"136725"|"Janumet 50-500 MG Oral Tablet"|"69402"|"Diabetes Mellitus Poorly Controlled"|"6"|"0.6"  
"136728"|"Hydrocortisone 5 MG Oral Tablet"|"69214"|"Hypopituitarism"|"3"|"0.5"  
"136728"|"Hydrocortisone 5 MG Oral Tablet"|"69464"|"Congenital Adrenal Hyperplasia"|"6"|"0.857143"  
"136728"|"Hydrocortisone 5 MG Oral Tablet"|"69466"|"21-hydroxylase Deficiency (Non Salt Losing)"|"2"|"1"  
"136731"|"Pylera 140-125-125 MG Oral Capsule"|"64764"|"Gastritis Due To H. Pylori"|"2"|"0.666667"  
"136741"|"Hydrocortisone 10 MG Oral Tablet"|"69214"|"Hypopituitarism"|"8"|"0.727273"  
"136741"|"Hydrocortisone 10 MG Oral Tablet"|"69215"|"Iatrogenic Hypopituitarism"|"3"|"0.75"  
"136741"|"Hydrocortisone 10 MG Oral Tablet"|"69464"|"Congenital Adrenal Hyperplasia"|"2"|"0.666667"  
"136741"|"Hydrocortisone 10 MG Oral Tablet"|"69493"|"Primary Adrenal Insufficiency (Addison Disease)"|"2"|"0.333333"  
"136741"|"Hydrocortisone 10 MG Oral Tablet"|"69507"|"Secondary Adrenal Insufficiency"|"3"|"0.75"  
"136741"|"Hydrocortisone 10 MG Oral Tablet"|"80830"|"Malignant Neoplasm Of The Prostate Gland"|"4"|"1"  
"136741"|"Hydrocortisone 10 MG Oral Tablet"|"80831"|"Adenocarcinoma Of The Prostate Gland"|"3"|"0.3"  
"136741"|"Hydrocortisone 10 MG Oral Tablet"|"80847"|"Renal Cell Carcinoma"|"2"|"0.666667"  
"136741"|"Hydrocortisone 10 MG Oral Tablet"|"181267"|"Carcinoma Of The Prostate Gland"|"2"|"1"  
"136741"|"Hydrocortisone 10 MG Oral Tablet"|"278812"|"Prostate Cancer"|"40"|"0.754717"  
"136741"|"Hydrocortisone 10 MG Oral Tablet"|"291853"|"Adrenal Insufficiency"|"6"|"0.75"  
"136750"|"Janumet 50-1000 MG Oral Tablet"|"69380"|"Diabetes Mellitus"|"20"|"0.333333"  
"136750"|"Janumet 50-1000 MG Oral Tablet"|"69381"|"Type II Diabetes Mellitus"|"17"|"0.485714"  
"136750"|"Janumet 50-1000 MG Oral Tablet"|"69382"|"Type II Diabetes Mellitus - Uncomplicated, Uncontrolled"|"5"|"0.5"  
"136750"|"Janumet 50-1000 MG Oral Tablet"|"69402"|"Diabetes Mellitus Poorly Controlled"|"8"|"0.32"  
"136795"|"Vitamin D 1000 UNIT Oral Capsule"|"68058"|"Vitamin D Deficiency"|"33"|"0.6875"  
"136818"|"Lidocaine-Hydrocortisone Ace 3-2.5 % Rectal Kit"|"65141"|"External Hemorrhoids"|"2"|"1"  
"136850"|"Exforge 10-320 MG Oral Tablet"|"63467"|"Hypertension"|"4"|"0.173913"  
"136850"|"Exforge 10-320 MG Oral Tablet"|"63470"|"Benign Essential Hypertension"|"2"|"0.333333"  
"136865"|"Symbicort 80-4.5 MCG/ACT Inhalation Aerosol"|"64180"|"Reactive Airway Disease"|"2"|"0.5"  
"136865"|"Symbicort 80-4.5 MCG/ACT Inhalation Aerosol"|"64181"|"Asthma"|"10"|"0.416667"  
"136865"|"Symbicort 80-4.5 MCG/ACT Inhalation Aerosol"|"64205"|"Chronic Obstructive Pulmonary Disease"|"2"|"0.333333"  
"136865"|"Symbicort 80-4.5 MCG/ACT Inhalation Aerosol"|"297031"|"Intermittent Asthma"|"2"|"1"  
"136879"|"Fosamax Plus D 70-5600 MG-UNIT Oral Tablet"|"69340"|"Osteopenia"|"2"|"0.666667"  
"136885"|"Hyper-Sal 7 % Inhalation Nebulization Solution"|"32925"|"Chronic Respiratory Failure"|"3"|"0.75"  
"136885"|"Hyper-Sal 7 % Inhalation Nebulization Solution"|"67695"|"Cystic Fibrosis"|"5"|"0.833333"  
"136889"|"Zolpidem Tartrate 5 MG Oral Tablet"|"35314"|"Personality Change Due To Axis III Etiology"|"2"|"1"  
"136889"|"Zolpidem Tartrate 5 MG Oral Tablet"|"61103"|"Sleep Disturbances"|"5"|"0.625"  
"136889"|"Zolpidem Tartrate 5 MG Oral Tablet"|"61108"|"Insomnia"|"151"|"0.758794"  
"136889"|"Zolpidem Tartrate 5 MG Oral Tablet"|"70455"|"Rheumatoid Arthritis"|"3"|"0.176471"  
"136889"|"Zolpidem Tartrate 5 MG Oral Tablet"|"70475"|"Scleroderma"|"2"|"0.5"  
"136889"|"Zolpidem Tartrate 5 MG Oral Tablet"|"70598"|"Polymyositis / Dermatomyositis"|"2"|"0.666667"  
"136889"|"Zolpidem Tartrate 5 MG Oral Tablet"|"75080"|"Parkinson's Disease"|"2"|"0.5"  
"136889"|"Zolpidem Tartrate 5 MG Oral Tablet"|"75125"|"Multiple Sclerosis"|"3"|"0.428571"  
"136889"|"Zolpidem Tartrate 5 MG Oral Tablet"|"75929"|"Mood Disorder Due To General Medical Condition"|"2"|"0.666667"  
"136889"|"Zolpidem Tartrate 5 MG Oral Tablet"|"76357"|"Major Depression, Recurrent"|"2"|"0.285714"

"136889"|"Zolpidem Tartrate 5 MG Oral Tablet"|"76361"|"Moderate Recurrent Major Depression"|"2"|"0.5"  
"136889"|"Zolpidem Tartrate 5 MG Oral Tablet"|"76388"|"Bipolar Disorder NOS"|"2"|"0.285714"  
"136889"|"Zolpidem Tartrate 5 MG Oral Tablet"|"76395"|"Primary Insomnia"|"4"|"0.285714"  
"136889"|"Zolpidem Tartrate 5 MG Oral Tablet"|"76536"|"Generalized Anxiety Disorder"|"3"|"0.375"  
"136889"|"Zolpidem Tartrate 5 MG Oral Tablet"|"76680"|"Adjustment Disorder With Anxiety"|"2"|"0.4"  
"136889"|"Zolpidem Tartrate 5 MG Oral Tablet"|"80831"|"Adenocarcinoma Of The Prostate Gland"|"2"|"0.5"  
"136889"|"Zolpidem Tartrate 5 MG Oral Tablet"|"93044"|"Difficulty Falling Asleep"|"2"|"1"  
"136889"|"Zolpidem Tartrate 5 MG Oral Tablet"|"173463"|"Insomnia Due To Stress"|"2"|"0.333333"  
"136889"|"Zolpidem Tartrate 5 MG Oral Tablet"|"252681"|"Fatigue"|"6"|"0.111111"  
"136889"|"Zolpidem Tartrate 5 MG Oral Tablet"|"257912"|"Disorder Of Mitochondrial Metabolism"|"2"|"1"  
"136906"|"Exforge 5-320 MG Oral Tablet"|"63468"|"Essential Hypertension"|"2"|"0.333333"  
"136906"|"Exforge 5-320 MG Oral Tablet"|"63470"|"Benign Essential Hypertension"|"2"|"0.5"  
"136907"|"Veramyst 27.5 MCG/SPRAY Nasal Suspension"|"32925"|"Chronic Respiratory Failure"|"2"|"0.285714"  
"136907"|"Veramyst 27.5 MCG/SPRAY Nasal Suspension"|"60869"|"Cough"|"9"|"0.183673"  
"136907"|"Veramyst 27.5 MCG/SPRAY Nasal Suspension"|"62586"|"Chronic Maxillary Sinusitis"|"3"|"0.176471"  
"136907"|"Veramyst 27.5 MCG/SPRAY Nasal Suspension"|"62597"|"Rhinitis"|"3"|"0.5"  
"136907"|"Veramyst 27.5 MCG/SPRAY Nasal Suspension"|"62598"|"Allergic Rhinitis"|"262"|"0.663291"  
"136907"|"Veramyst 27.5 MCG/SPRAY Nasal Suspension"|"62599"|"Allergic Rhinitis Due To Pollen"|"2"|"0.5"  
"136907"|"Veramyst 27.5 MCG/SPRAY Nasal Suspension"|"62611"|"Chronic Rhinitis"|"10"|"0.322581"  
"136907"|"Veramyst 27.5 MCG/SPRAY Nasal Suspension"|"62614"|"Deviated Nasal Septum (Acquired)"|"6"|"0.26087"  
"136907"|"Veramyst 27.5 MCG/SPRAY Nasal Suspension"|"62615"|"Hypertrophied Nasal Turbinate"|"4"|"0.363636"  
"136907"|"Veramyst 27.5 MCG/SPRAY Nasal Suspension"|"64181"|"Asthma"|"67"|"0.184066"  
"136907"|"Veramyst 27.5 MCG/SPRAY Nasal Suspension"|"257912"|"Disorder Of Mitochondrial Metabolism"|"8"|"0.444444"  
"136907"|"Veramyst 27.5 MCG/SPRAY Nasal Suspension"|"258010"|"Allergic Reaction"|"2"|"1"  
"136918"|"Methotrexate Sodium 250 MG/10ML Injection Solution"|"70455"|"Rheumatoid Arthritis"|"2"|"1"  
"136923"|"Vyvanse 50 MG Oral Capsule"|"75819"|"ADHD, Predominantly Inattentive Type"|"2"|"0.666667"  
"136923"|"Vyvanse 50 MG Oral Capsule"|"275486"|"ADHD, Combined Type"|"7"|"0.777778"  
"136940"|"Exforge 10-160 MG Oral Tablet"|"63467"|"Hypertension"|"3"|"0.272727"  
"136970"|"Dexmethylphenidate HCl 5 MG Oral Tablet"|"275486"|"ADHD, Combined Type"|"2"|"1"  
"136973"|"Cefdinir 125 MG/5ML Oral Suspension Reconstituted"|"62402"|"Otitis Media Of The Right Ear"|"4"|"0.210526"  
"136973"|"Cefdinir 125 MG/5ML Oral Suspension Reconstituted"|"62403"|"Otitis Media Of The Left Ear"|"7"|"0.411765"  
"136973"|"Cefdinir 125 MG/5ML Oral Suspension Reconstituted"|"62404"|"Otitis Media In Both Ears"|"4"|"0.2"  
"136973"|"Cefdinir 125 MG/5ML Oral Suspension Reconstituted"|"62577"|"Sinusitis"|"5"|"0.5"  
"136973"|"Cefdinir 125 MG/5ML Oral Suspension Reconstituted"|"62719"|"Acute Tracheitis"|"2"|"0.666667"  
"136973"|"Cefdinir 125 MG/5ML Oral Suspension Reconstituted"|"64126"|"Pneumonia"|"5"|"0.333333"  
"136973"|"Cefdinir 125 MG/5ML Oral Suspension Reconstituted"|"65762"|"Urinary Tract Infection"|"7"|"0.777778"  
"136973"|"Cefdinir 125 MG/5ML Oral Suspension Reconstituted"|"251528"|"Acute Otitis Media"|"13"|"0.333333"  
"136979"|"Zolpidem Tartrate 10 MG Oral Tablet"|"61103"|"Sleep Disturbances"|"2"|"0.4"  
"136979"|"Zolpidem Tartrate 10 MG Oral Tablet"|"61108"|"Insomnia"|"304"|"0.793734"  
"136979"|"Zolpidem Tartrate 10 MG Oral Tablet"|"61118"|"Anxiety (Symptom)"|"7"|"0.1"  
"136979"|"Zolpidem Tartrate 10 MG Oral Tablet"|"64205"|"Chronic Obstructive Pulmonary Disease"|"3"|"0.136364"  
"136979"|"Zolpidem Tartrate 10 MG Oral Tablet"|"76351"|"Depression"|"14"|"0.0858896"  
"136979"|"Zolpidem Tartrate 10 MG Oral Tablet"|"76357"|"Major Depression, Recurrent"|"5"|"0.185185"  
"136979"|"Zolpidem Tartrate 10 MG Oral Tablet"|"76361"|"Moderate Recurrent Major Depression"|"4"|"0.5"  
"136979"|"Zolpidem Tartrate 10 MG Oral Tablet"|"76388"|"Bipolar Disorder NOS"|"4"|"0.307692"  
"136979"|"Zolpidem Tartrate 10 MG Oral Tablet"|"76389"|"Atypical Depressive Disorder"|"2"|"0.285714"  
"136979"|"Zolpidem Tartrate 10 MG Oral Tablet"|"76395"|"Primary Insomnia"|"8"|"0.470588"  
"136979"|"Zolpidem Tartrate 10 MG Oral Tablet"|"76404"|"Sleep-wake Schedule Disorder, Frequently Changing"|"3"|"1"  
"136979"|"Zolpidem Tartrate 10 MG Oral Tablet"|"76536"|"Generalized Anxiety Disorder"|"7"|"0.466667"

"136979"|"Zolpidem Tartrate 10 MG Oral Tablet"|"76537"|"Panic Disorder Without Agoraphobia"|"4"|"0.4"  
"136979"|"Zolpidem Tartrate 10 MG Oral Tablet"|"76548"|"Chronic Post-traumatic Stress Disorder"|"2"|"0.333333"  
"136979"|"Zolpidem Tartrate 10 MG Oral Tablet"|"76587"|"Anxiety Disorder NOS"|"4"|"0.16"  
"136979"|"Zolpidem Tartrate 10 MG Oral Tablet"|"76680"|"Adjustment Disorder With Anxiety"|"3"|"0.1875"  
"136979"|"Zolpidem Tartrate 10 MG Oral Tablet"|"173460"|"Secondary Insomnia"|"8"|"0.8"  
"136979"|"Zolpidem Tartrate 10 MG Oral Tablet"|"173463"|"Insomnia Due To Stress"|"3"|"0.428571"  
"136979"|"Zolpidem Tartrate 10 MG Oral Tablet"|"173466"|"Obstructive Sleep Apnea"|"6"|"0.139535"  
"136979"|"Zolpidem Tartrate 10 MG Oral Tablet"|"196089"|"Adjustment Disorder With Anxiety And Depressed  
Mood"|"4"|"0.333333"  
"136979"|"Zolpidem Tartrate 10 MG Oral Tablet"|"275541"|"Adjustment Insomnia"|"2"|"0.666667"  
"136979"|"Zolpidem Tartrate 10 MG Oral Tablet"|"275542"|"Persistent Insomnia"|"2"|"0.333333"  
"136979"|"Zolpidem Tartrate 10 MG Oral Tablet"|"275592"|"Post-traumatic Stress Disorder"|"3"|"0.3"  
"136979"|"Zolpidem Tartrate 10 MG Oral Tablet"|"275605"|"Idiopathic Insomnia"|"2"|"0.4"  
"136991"|"BuPROPion HCl 300 MG Oral Tablet Extended Release 24 Hour"|"61118"|"Anxiety  
(Symptom)"|"4"|"0.235294"  
"136991"|"BuPROPion HCl 300 MG Oral Tablet Extended Release 24 Hour"|"75125"|"Multiple  
Sclerosis"|"5"|"0.454545"  
"136991"|"BuPROPion HCl 300 MG Oral Tablet Extended Release 24 Hour"|"76272"|"Schizoaffective  
Disorder"|"2"|"1"  
"136991"|"BuPROPion HCl 300 MG Oral Tablet Extended Release 24 Hour"|"76306"|"Episodic Mood  
Disorders"|"2"|"0.5"  
"136991"|"BuPROPion HCl 300 MG Oral Tablet Extended Release 24 Hour"|"76351"|"Depression"|"35"|"0.673077"  
"136991"|"BuPROPion HCl 300 MG Oral Tablet Extended Release 24 Hour"|"76357"|"Major Depression,  
Recurrent"|"5"|"0.384615"  
"136991"|"BuPROPion HCl 300 MG Oral Tablet Extended Release 24 Hour"|"76361"|"Moderate Recurrent Major  
Depression"|"5"|"0.454545"  
"136991"|"BuPROPion HCl 300 MG Oral Tablet Extended Release 24 Hour"|"76383"|"Dysthymic Disorder"|"3"|"1"  
"136991"|"BuPROPion HCl 300 MG Oral Tablet Extended Release 24 Hour"|"76388"|"Bipolar Disorder  
NOS"|"3"|"0.375"  
"136991"|"BuPROPion HCl 300 MG Oral Tablet Extended Release 24 Hour"|"76536"|"Generalized Anxiety  
Disorder"|"4"|"0.571429"  
"136991"|"BuPROPion HCl 300 MG Oral Tablet Extended Release 24 Hour"|"76537"|"Panic Disorder Without  
Agoraphobia"|"2"|"0.4"  
"136991"|"BuPROPion HCl 300 MG Oral Tablet Extended Release 24 Hour"|"76680"|"Adjustment Disorder With  
Anxiety"|"2"|"0.5"  
"136991"|"BuPROPion HCl 300 MG Oral Tablet Extended Release 24 Hour"|"275604"|"Depression With  
Anxiety"|"3"|"0.6"  
"136994"|"Flovent Diskus 50 MCG/BLIST Inhalation Aerosol Powder Breath Activated"|"64181"|"Asthma"|"3"|"0.6"  
"137000"|"SEROquel XR 400 MG Oral Tablet Extended Release 24 Hour"|"76232"|"Paranoid Schizophrenia"|"2"|"1"  
"137000"|"SEROquel XR 400 MG Oral Tablet Extended Release 24 Hour"|"76272"|"Schizoaffective  
Disorder"|"2"|"0.666667"  
"137000"|"SEROquel XR 400 MG Oral Tablet Extended Release 24 Hour"|"76307"|"Bipolar Disorder"|"2"|"0.4"  
"137000"|"SEROquel XR 400 MG Oral Tablet Extended Release 24 Hour"|"76327"|"Bipolar I Disorder, Most Recent  
Episode, Mixed Severe With Psychotic Features"|"2"|"1"  
"137000"|"SEROquel XR 400 MG Oral Tablet Extended Release 24 Hour"|"76388"|"Bipolar Disorder NOS"|"4"|"1"  
"137020"|"AzaSite 1 % Ophthalmic Solution"|"61418"|"Acute Conjunctivitis"|"2"|"1"  
"137028"|"Symbicort 160-4.5 MCG/ACT Inhalation Aerosol"|"60863"|"Difficulty Breathing (Dyspnea)"|"3"|"0.25"  
"137028"|"Symbicort 160-4.5 MCG/ACT Inhalation Aerosol"|"64181"|"Asthma"|"33"|"0.428571"  
"137028"|"Symbicort 160-4.5 MCG/ACT Inhalation Aerosol"|"64199"|"Chronic Obstructive Asthma"|"2"|"0.666667"  
"137028"|"Symbicort 160-4.5 MCG/ACT Inhalation Aerosol"|"64205"|"Chronic Obstructive Pulmonary  
Disease"|"13"|"0.40625"  
"137028"|"Symbicort 160-4.5 MCG/ACT Inhalation Aerosol"|"64212"|"Emphysema"|"2"|"0.285714"  
"137028"|"Symbicort 160-4.5 MCG/ACT Inhalation Aerosol"|"64295"|"Idiopathic Pulmonary Fibrosis"|"2"|"1"  
"137028"|"Symbicort 160-4.5 MCG/ACT Inhalation Aerosol"|"247012"|"Shortness Of Breath"|"3"|"0.25"

"137028"|"Symbicort 160-4.5 MCG/ACT Inhalation Aerosol"|"297031"|"Intermittent Asthma"|"3"|"1"  
"137032"|"Caltrate 600+D 600-400 MG-UNIT Oral Tablet"|"69340"|"Osteopenia"|"2"|"0.666667"  
"137042"|"Cefdinir 300 MG Oral Capsule"|"62344"|"Acute Suppurative Otitis Media"|"2"|"1"  
"137042"|"Cefdinir 300 MG Oral Capsule"|"62577"|"Sinusitis"|"2"|"0.666667"  
"137042"|"Cefdinir 300 MG Oral Capsule"|"62578"|"Acute Sinusitis"|"4"|"0.444444"  
"137042"|"Cefdinir 300 MG Oral Capsule"|"62586"|"Chronic Maxillary Sinusitis"|"2"|"0.5"  
"137042"|"Cefdinir 300 MG Oral Capsule"|"62588"|"Chronic Ethmoidal Sinusitis"|"2"|"0.333333"  
"137042"|"Cefdinir 300 MG Oral Capsule"|"64118"|"Acute Bronchitis"|"2"|"0.5"  
"137042"|"Cefdinir 300 MG Oral Capsule"|"65753"|"Acute Cystitis"|"2"|"0.5"  
"137042"|"Cefdinir 300 MG Oral Capsule"|"65762"|"Urinary Tract Infection"|"4"|"0.5"  
"137042"|"Cefdinir 300 MG Oral Capsule"|"251575"|"Streptococcal Sore Throat"|"2"|"1"  
"137045"|"Activella 0.5-0.1 MG Oral Tablet"|"66073"|"Menopause"|"2"|"0.666667"  
"137045"|"Activella 0.5-0.1 MG Oral Tablet"|"195794"|"Symptomatic Menopause"|"4"|"1"  
"137055"|"FreeStyle Lite Test In Vitro Strip"|"65712"|"Diabetic Nephropathy Type II - Uncontrolled"|"2"|"0.666667"  
"137055"|"FreeStyle Lite Test In Vitro Strip"|"69380"|"Diabetes Mellitus"|"47"|"0.324138"  
"137055"|"FreeStyle Lite Test In Vitro Strip"|"69381"|"Type II Diabetes Mellitus"|"33"|"0.354839"  
"137055"|"FreeStyle Lite Test In Vitro Strip"|"69382"|"Type II Diabetes Mellitus - Uncomplicated, Uncontrolled"|"4"|"0.285714"  
"137055"|"FreeStyle Lite Test In Vitro Strip"|"69387"|"Type I Diabetes Mellitus"|"5"|"0.25"  
"137055"|"FreeStyle Lite Test In Vitro Strip"|"69388"|"Type I Diabetes Mellitus - Uncontrolled"|"17"|"0.548387"  
"137055"|"FreeStyle Lite Test In Vitro Strip"|"69402"|"Diabetes Mellitus Poorly Controlled"|"53"|"0.638554"  
"137055"|"FreeStyle Lite Test In Vitro Strip"|"69461"|"Prediabetes"|"2"|"0.333333"  
"137055"|"FreeStyle Lite Test In Vitro Strip"|"258942"|"Type II Diabetes Mellitus - Uncomplicated, Controlled"|"2"|"0.285714"  
"137077"|"Amlodipine Besy-Benazepril HCl 5-20 MG Oral Capsule"|"63467"|"Hypertension"|"14"|"0.388889"  
"137077"|"Amlodipine Besy-Benazepril HCl 5-20 MG Oral Capsule"|"63468"|"Essential Hypertension"|"7"|"0.411765"  
"137077"|"Amlodipine Besy-Benazepril HCl 5-20 MG Oral Capsule"|"63470"|"Benign Essential Hypertension"|"17"|"0.73913"  
"137077"|"Amlodipine Besy-Benazepril HCl 5-20 MG Oral Capsule"|"278812"|"Prostate Cancer"|"2"|"0.4"  
"137098"|"Cefdinir 250 MG/5ML Oral Suspension Reconstituted"|"62403"|"Otitis Media Of The Left Ear"|"3"|"0.375"  
"137098"|"Cefdinir 250 MG/5ML Oral Suspension Reconstituted"|"62404"|"Otitis Media In Both Ears"|"2"|"0.5"  
"137098"|"Cefdinir 250 MG/5ML Oral Suspension Reconstituted"|"62598"|"Allergic Rhinitis"|"3"|"0.115385"  
"137098"|"Cefdinir 250 MG/5ML Oral Suspension Reconstituted"|"251528"|"Acute Otitis Media"|"17"|"0.586207"  
"137098"|"Cefdinir 250 MG/5ML Oral Suspension Reconstituted"|"251575"|"Streptococcal Sore Throat"|"2"|"1"  
"137098"|"Cefdinir 250 MG/5ML Oral Suspension Reconstituted"|"274516"|"Acute Pharyngitis Streptococcus"|"2"|"1"  
"137100"|"Exforge 5-160 MG Oral Tablet"|"63467"|"Hypertension"|"3"|"0.25"  
"137100"|"Exforge 5-160 MG Oral Tablet"|"63468"|"Essential Hypertension"|"2"|"0.5"  
"137104"|"Reclast 5 MG/100ML Intravenous Solution"|"69340"|"Osteopenia"|"3"|"0.428571"  
"137104"|"Reclast 5 MG/100ML Intravenous Solution"|"69341"|"Osteoporosis"|"41"|"0.854167"  
"137104"|"Reclast 5 MG/100ML Intravenous Solution"|"69342"|"Postmenopausal Osteoporosis"|"4"|"0.666667"  
"137104"|"Reclast 5 MG/100ML Intravenous Solution"|"69343"|"Osteoporosis Senile"|"2"|"0.666667"  
"137105"|"Amlodipine Besy-Benazepril HCl 2.5-10 MG Oral Capsule"|"63470"|"Benign Essential Hypertension"|"2"|"1"  
"137110"|"Amlodipine Besy-Benazepril HCl 5-10 MG Oral Capsule"|"63467"|"Hypertension"|"5"|"0.172414"  
"137110"|"Amlodipine Besy-Benazepril HCl 5-10 MG Oral Capsule"|"63468"|"Essential Hypertension"|"4"|"0.363636"  
"137110"|"Amlodipine Besy-Benazepril HCl 5-10 MG Oral Capsule"|"63470"|"Benign Essential Hypertension"|"8"|"0.666667"  
"137119"|"Letairis 10 MG Oral Tablet"|"63484"|"Pulmonary Hypertension"|"2"|"0.5"  
"137125"|"Suprax 200 MG/5ML Oral Suspension Reconstituted"|"65762"|"Urinary Tract Infection"|"5"|"0.714286"  
"137173"|"Pravastatin Sodium 80 MG Oral Tablet"|"67970"|"Hyperlipidemia"|"31"|"0.574074"  
"137173"|"Pravastatin Sodium 80 MG Oral Tablet"|"67974"|"Frederickson Type IIB Hyperlipidemia"|"2"|"0.666667"  
"137173"|"Pravastatin Sodium 80 MG Oral Tablet"|"283292"|"Essential Hypercholesterolemia"|"2"|"0.333333"  
"137173"|"Pravastatin Sodium 80 MG Oral Tablet"|"291485"|"Dyslipidemia"|"4"|"0.444444"  
"137176"|"Vyvanse 30 MG Oral Capsule"|"75818"|"Attention-deficit Hyperactivity Disorder"|"4"|"0.2"

"137176"|"Vyvance 30 MG Oral Capsule"|"75819"|"ADHD, Predominantly Inattentive Type"|"6"|"0.6"  
"137176"|"Vyvance 30 MG Oral Capsule"|"275486"|"ADHD, Combined Type"|"10"|"0.666667"  
"137176"|"Vyvance 30 MG Oral Capsule"|"291687"|"Attention Deficit Disorder Without Hyperactivity"|"2"|"0.285714"  
"137178"|"Amlodipine Besy-Benazepril HCl 10-20 MG Oral Capsule"|"63467"|"Hypertension"|"25"|"0.357143"  
"137178"|"Amlodipine Besy-Benazepril HCl 10-20 MG Oral Capsule"|"63468"|"Essential  
Hypertension"|"17"|"0.53125"  
"137178"|"Amlodipine Besy-Benazepril HCl 10-20 MG Oral Capsule"|"63470"|"Benign Essential  
Hypertension"|"22"|"0.666667"  
"137196"|"SEROquel XR 200 MG Oral Tablet Extended Release 24 Hour"|"76306"|"Episodic Mood Disorders"|"2"|"1"  
"137196"|"SEROquel XR 200 MG Oral Tablet Extended Release 24 Hour"|"76307"|"Bipolar Disorder"|"2"|"1"  
"137196"|"SEROquel XR 200 MG Oral Tablet Extended Release 24 Hour"|"76351"|"Depression"|"2"|"0.666667"  
"137196"|"SEROquel XR 200 MG Oral Tablet Extended Release 24 Hour"|"76388"|"Bipolar Disorder NOS"|"3"|"0.75"  
"137205"|"Lovaza 1 GM Oral Capsule"|"67970"|"Hyperlipidemia"|"99"|"0.492537"  
"137205"|"Lovaza 1 GM Oral Capsule"|"67988"|"Familial Hypertriglyceridemia"|"2"|"0.333333"  
"137205"|"Lovaza 1 GM Oral Capsule"|"68098"|"Lipoid Metabolism Disorder"|"2"|"0.25"  
"137205"|"Lovaza 1 GM Oral Capsule"|"69402"|"Diabetes Mellitus Poorly Controlled"|"10"|"0.149254"  
"137205"|"Lovaza 1 GM Oral Capsule"|"257908"|"Essential Hypertriglyceridemia"|"12"|"0.5"  
"137205"|"Lovaza 1 GM Oral Capsule"|"283292"|"Essential Hypercholesterolemia"|"4"|"0.266667"  
"137205"|"Lovaza 1 GM Oral Capsule"|"291485"|"Dyslipidemia"|"16"|"0.390244"  
"137214"|"SEROquel XR 300 MG Oral Tablet Extended Release 24 Hour"|"76307"|"Bipolar Disorder"|"4"|"0.5"  
"137214"|"SEROquel XR 300 MG Oral Tablet Extended Release 24 Hour"|"76327"|"Bipolar I Disorder, Most Recent  
Episode, Mixed Severe With Psychotic Features"|"2"|"1"  
"137214"|"SEROquel XR 300 MG Oral Tablet Extended Release 24 Hour"|"76343"|"Bipolar I Disorder, Most Recent  
Episode, Depressed - Moderate"|"2"|"1"  
"137214"|"SEROquel XR 300 MG Oral Tablet Extended Release 24 Hour"|"76348"|"Bipolar II  
Disorder"|"2"|"0.666667"  
"137214"|"SEROquel XR 300 MG Oral Tablet Extended Release 24 Hour"|"76388"|"Bipolar Disorder NOS"|"3"|"0.75"  
"137228"|"Vyvance 70 MG Oral Capsule"|"75818"|"Attention-deficit Hyperactivity Disorder"|"2"|"0.4"  
"137228"|"Vyvance 70 MG Oral Capsule"|"75819"|"ADHD, Predominantly Inattentive Type"|"2"|"0.666667"  
"137607"|"Terbinafine HCl 250 MG Oral Tablet"|"70119"|"Onychomycosis"|"29"|"0.644444"  
"137607"|"Terbinafine HCl 250 MG Oral Tablet"|"70122"|"Tinea Pedis"|"5"|"0.5"  
"137607"|"Terbinafine HCl 250 MG Oral Tablet"|"70124"|"Tinea Corporis"|"4"|"0.4"  
"137607"|"Terbinafine HCl 250 MG Oral Tablet"|"88375"|"Skin: A Rash"|"3"|"0.5"  
"137607"|"Terbinafine HCl 250 MG Oral Tablet"|"278562"|"Onychomycosis Of The Toenails"|"17"|"0.68"  
"137607"|"Terbinafine HCl 250 MG Oral Tablet"|"278606"|"Onychomycosis Of The Fingernails"|"6"|"0.75"  
"137607"|"Terbinafine HCl 250 MG Oral Tablet"|"278662"|"Onychomycosis Of The Right 1st Toenail"|"2"|"0.333333"  
"137607"|"Terbinafine HCl 250 MG Oral Tablet"|"278663"|"Onychomycosis Of The Left Toenails"|"2"|"0.666667"  
"137607"|"Terbinafine HCl 250 MG Oral Tablet"|"278664"|"Onychomycosis Of The Left 1st Toenail"|"5"|"0.833333"  
"137617"|"Terbinafine HCl 1 % External Cream"|"70116"|"Tinea Capitis"|"2"|"0.285714"  
"137617"|"Terbinafine HCl 1 % External Cream"|"70119"|"Onychomycosis"|"2"|"0.666667"  
"137617"|"Terbinafine HCl 1 % External Cream"|"70122"|"Tinea Pedis"|"3"|"0.25"  
"137617"|"Terbinafine HCl 1 % External Cream"|"70124"|"Tinea Corporis"|"13"|"0.619048"  
"137617"|"Terbinafine HCl 1 % External Cream"|"77190"|"Fungal Infections"|"2"|"1"  
"137617"|"Terbinafine HCl 1 % External Cream"|"77216"|"Genitourinary Candidiasis"|"2"|"1"  
"137617"|"Terbinafine HCl 1 % External Cream"|"173522"|"Candidal Intertrigo"|"2"|"0.666667"  
"137659"|"BD Ultra-Fine Needles 31 guage"|"69380"|"Diabetes Mellitus"|"5"|"0.333333"  
"137659"|"BD Ultra-Fine Needles 31 guage"|"69381"|"Type II Diabetes Mellitus"|"2"|"0.222222"  
"137659"|"BD Ultra-Fine Needles 31 guage"|"69382"|"Type II Diabetes Mellitus - Uncomplicated,  
Uncontrolled"|"5"|"0.625"  
"137659"|"BD Ultra-Fine Needles 31 guage"|"69402"|"Diabetes Mellitus Poorly Controlled"|"3"|"0.428571"  
"137674"|"Lantus SoloStar 100 UNIT/ML Subcutaneous Solution"|"65712"|"Diabetic Nephropathy Type II -  
Uncontrolled"|"2"|"0.333333"  
"137674"|"Lantus SoloStar 100 UNIT/ML Subcutaneous Solution"|"69380"|"Diabetes Mellitus"|"49"|"0.260638"  
"137674"|"Lantus SoloStar 100 UNIT/ML Subcutaneous Solution"|"69381"|"Type II Diabetes

Mellitus"|"35"|"0.321101"  
"137674"|"Lantus SoloStar 100 UNIT/ML Subcutaneous Solution"|"69382"|"Type II Diabetes Mellitus -  
Uncomplicated, Uncontrolled"|"15"|"0.405405"  
"137674"|"Lantus SoloStar 100 UNIT/ML Subcutaneous Solution"|"69387"|"Type I Diabetes  
Mellitus"|"24"|"0.510638"  
"137674"|"Lantus SoloStar 100 UNIT/ML Subcutaneous Solution"|"69388"|"Type I Diabetes Mellitus -  
Uncontrolled"|"58"|"0.805556"  
"137674"|"Lantus SoloStar 100 UNIT/ML Subcutaneous Solution"|"69401"|"Diabetes Mellitus Under  
Control"|"5"|"0.416667"  
"137674"|"Lantus SoloStar 100 UNIT/ML Subcutaneous Solution"|"69402"|"Diabetes Mellitus Poorly  
Controlled"|"108"|"0.75"  
"137708"|"Metoprolol Succinate 50 MG Oral Tablet Extended Release 24 Hour"|"62916"|"Atrial  
Fibrillation"|"15"|"0.174419"  
"137708"|"Metoprolol Succinate 50 MG Oral Tablet Extended Release 24 Hour"|"62975"|"Coronary Artery  
Disease"|"36"|"0.178218"  
"137708"|"Metoprolol Succinate 50 MG Oral Tablet Extended Release 24 Hour"|"63148"|"2-vessel Coronary Artery  
Stenosis"|"2"|"0.2"  
"137708"|"Metoprolol Succinate 50 MG Oral Tablet Extended Release 24 Hour"|"63173"|"Cardiomyopathy"|"3"|"0.3"  
"137708"|"Metoprolol Succinate 50 MG Oral Tablet Extended Release 24 Hour"|"63217"|"Congestive Heart  
Failure"|"11"|"0.150685"  
"137708"|"Metoprolol Succinate 50 MG Oral Tablet Extended Release 24 Hour"|"63232"|"Benign Hypertensive Heart  
Disease"|"3"|"0.6"  
"137708"|"Metoprolol Succinate 50 MG Oral Tablet Extended Release 24  
Hour"|"63467"|"Hypertension"|"182"|"0.401766"  
"137708"|"Metoprolol Succinate 50 MG Oral Tablet Extended Release 24 Hour"|"63468"|"Essential  
Hypertension"|"95"|"0.521978"  
"137708"|"Metoprolol Succinate 50 MG Oral Tablet Extended Release 24 Hour"|"63470"|"Benign Essential  
Hypertension"|"98"|"0.515789"  
"137708"|"Metoprolol Succinate 50 MG Oral Tablet Extended Release 24  
Hour"|"282270"|"Palpitations"|"4"|"0.166667"  
"137709"|"Mucinex DM Maximum Strength 60-1200 MG Oral Tablet Extended Release 12  
Hour"|"60869"|"Cough"|"2"|"1"  
"137726"|"Metoprolol Succinate 200 MG Oral Tablet Extended Release 24 Hour"|"62975"|"Coronary Artery  
Disease"|"4"|"0.173913"  
"137726"|"Metoprolol Succinate 200 MG Oral Tablet Extended Release 24 Hour"|"63217"|"Congestive Heart  
Failure"|"8"|"0.470588"  
"137726"|"Metoprolol Succinate 200 MG Oral Tablet Extended Release 24  
Hour"|"63467"|"Hypertension"|"22"|"0.349206"  
"137726"|"Metoprolol Succinate 200 MG Oral Tablet Extended Release 24 Hour"|"63468"|"Essential  
Hypertension"|"12"|"0.375"  
"137726"|"Metoprolol Succinate 200 MG Oral Tablet Extended Release 24 Hour"|"63470"|"Benign Essential  
Hypertension"|"14"|"0.4375"  
"137730"|"Metoprolol Succinate 100 MG Oral Tablet Extended Release 24 Hour"|"62916"|"Atrial  
Fibrillation"|"11"|"0.174603"  
"137730"|"Metoprolol Succinate 100 MG Oral Tablet Extended Release 24 Hour"|"62975"|"Coronary Artery  
Disease"|"20"|"0.13986"  
"137730"|"Metoprolol Succinate 100 MG Oral Tablet Extended Release 24  
Hour"|"63173"|"Cardiomyopathy"|"5"|"0.357143"  
"137730"|"Metoprolol Succinate 100 MG Oral Tablet Extended Release 24 Hour"|"63174"|"Dilated  
Cardiomyopathy"|"2"|"0.25"  
"137730"|"Metoprolol Succinate 100 MG Oral Tablet Extended Release 24 Hour"|"63217"|"Congestive Heart  
Failure"|"19"|"0.292308"  
"137730"|"Metoprolol Succinate 100 MG Oral Tablet Extended Release 24 Hour"|"63232"|"Benign Hypertensive Heart  
Disease"|"2"|"1"

"137730"|"Metoprolol Succinate 100 MG Oral Tablet Extended Release 24 Hour"|"63467"|"Hypertension"|"117"|"0.391304"  
"137730"|"Metoprolol Succinate 100 MG Oral Tablet Extended Release 24 Hour"|"63468"|"Essential Hypertension"|"66"|"0.52381"  
"137730"|"Metoprolol Succinate 100 MG Oral Tablet Extended Release 24 Hour"|"63470"|"Benign Essential Hypertension"|"53"|"0.473214"  
"137730"|"Metoprolol Succinate 100 MG Oral Tablet Extended Release 24 Hour"|"63471"|"Accelerated Essential Hypertension"|"2"|"0.285714"  
"137730"|"Metoprolol Succinate 100 MG Oral Tablet Extended Release 24 Hour"|"250918"|"Chronic Systolic Congestive Heart Failure"|"2"|"0.25"  
"137766"|"Ranexa 1000 MG Oral Tablet Extended Release 12 Hour"|"62978"|"Coronary Arteriosclerosis"|"2"|"1"  
"137766"|"Ranexa 1000 MG Oral Tablet Extended Release 12 Hour"|"67970"|"Hyperlipidemia"|"2"|"0.285714"  
"137789"|"Mucinex D 120-1200 MG Oral Tablet Extended Release 12 Hour"|"62580"|"Acute Maxillary Sinusitis"|"2"|"1"  
"137792"|"Lexiva 50 MG/ML Oral Suspension"|"76835"|"HIV Infection"|"2"|"1"  
"137851"|"Xyzal 5 MG Oral Tablet"|"62598"|"Allergic Rhinitis"|"43"|"0.472527"  
"137874"|"Auralgan SOLN"|"62329"|"Acute Otitis Externa"|"3"|"0.75"  
"137874"|"Auralgan SOLN"|"62543"|"Earache"|"2"|"0.5"  
"137874"|"Auralgan SOLN"|"251528"|"Acute Otitis Media"|"2"|"0.333333"  
"137874"|"Auralgan SOLN"|"265990"|"Earache (Symptom)"|"2"|"1"  
"137874"|"Auralgan SOLN"|"274441"|"Earache In The Right Ear"|"2"|"1"  
"137920"|"Lipofen 50 MG Oral Capsule"|"291485"|"Dyslipidemia"|"3"|"1"  
"137924"|"Flunisolide 29 MCG/ACT (0.025%) Nasal Solution"|"62598"|"Allergic Rhinitis"|"25"|"0.735294"  
"138106"|"Carvedilol 12.5 MG Oral Tablet"|"62975"|"Coronary Artery Disease"|"20"|"0.181818"  
"138106"|"Carvedilol 12.5 MG Oral Tablet"|"63217"|"Congestive Heart Failure"|"29"|"0.305263"  
"138106"|"Carvedilol 12.5 MG Oral Tablet"|"63467"|"Hypertension"|"55"|"0.295699"  
"138106"|"Carvedilol 12.5 MG Oral Tablet"|"63468"|"Essential Hypertension"|"27"|"0.385714"  
"138106"|"Carvedilol 12.5 MG Oral Tablet"|"63470"|"Benign Essential Hypertension"|"22"|"0.360656"  
"138106"|"Carvedilol 12.5 MG Oral Tablet"|"274682"|"Kidney Disease With Benign Hypertension"|"2"|"1"  
"138107"|"Famciclovir 500 MG Oral Tablet"|"76782"|"Herpes Simplex Type I"|"3"|"1"  
"138107"|"Famciclovir 500 MG Oral Tablet"|"76794"|"Herpes Zoster (Shingles)"|"2"|"0.666667"  
"138107"|"Famciclovir 500 MG Oral Tablet"|"76835"|"HIV Infection"|"2"|"0.666667"  
"138107"|"Famciclovir 500 MG Oral Tablet"|"81092"|"Non-Hodgkin's Lymphoma"|"4"|"0.571429"  
"138119"|"Carvedilol 25 MG Oral Tablet"|"62914"|"Atrial Flutter"|"2"|"0.5"  
"138119"|"Carvedilol 25 MG Oral Tablet"|"62975"|"Coronary Artery Disease"|"30"|"0.265487"  
"138119"|"Carvedilol 25 MG Oral Tablet"|"63173"|"Cardiomyopathy"|"8"|"0.296296"  
"138119"|"Carvedilol 25 MG Oral Tablet"|"63174"|"Dilated Cardiomyopathy"|"5"|"0.192308"  
"138119"|"Carvedilol 25 MG Oral Tablet"|"63175"|"Ischemic Cardiomyopathy"|"5"|"0.16129"  
"138119"|"Carvedilol 25 MG Oral Tablet"|"63217"|"Congestive Heart Failure"|"37"|"0.349057"  
"138119"|"Carvedilol 25 MG Oral Tablet"|"63219"|"Left Heart Failure"|"2"|"0.285714"  
"138119"|"Carvedilol 25 MG Oral Tablet"|"63224"|"Congestive Heart Failure With Systolic And Diastolic Dysfunction"|"2"|"0.25"  
"138119"|"Carvedilol 25 MG Oral Tablet"|"63233"|"Benign Hypertensive Heart Disease With Congestive Heart Failure"|"2"|"0.333333"  
"138119"|"Carvedilol 25 MG Oral Tablet"|"63467"|"Hypertension"|"67"|"0.283898"  
"138119"|"Carvedilol 25 MG Oral Tablet"|"63468"|"Essential Hypertension"|"37"|"0.389474"  
"138119"|"Carvedilol 25 MG Oral Tablet"|"63470"|"Benign Essential Hypertension"|"18"|"0.25"  
"138119"|"Carvedilol 25 MG Oral Tablet"|"250862"|"Chronic Combined Systolic And Diastolic Congestive Heart Failure"|"2"|"0.666667"  
"138119"|"Carvedilol 25 MG Oral Tablet"|"250869"|"Acute Combined Systolic And Diastolic Congestive Heart Failure"|"2"|"0.333333"  
"138119"|"Carvedilol 25 MG Oral Tablet"|"250918"|"Chronic Systolic Congestive Heart Failure"|"3"|"0.142857"  
"138119"|"Carvedilol 25 MG Oral Tablet"|"274672"|"Chronic Kidney Disease, Stage 4"|"2"|"0.333333"  
"138130"|"Zyflo CR 600 MG Oral Tablet Extended Release 12 Hour"|"62586"|"Chronic Maxillary Sinusitis"|"2"|"0.25"

"138130""Zyflo CR 600 MG Oral Tablet Extended Release 12 Hour""62588""Chronic Ethmoidal Sinusitis""5""0.625"  
"138130""Zyflo CR 600 MG Oral Tablet Extended Release 12 Hour""64181""Asthma""2""0.333333"  
"138131""Carvedilol 6.25 MG Oral Tablet""62916""Atrial Fibrillation""4""0.142857"  
"138131""Carvedilol 6.25 MG Oral Tablet""62975""Coronary Artery Disease""26""0.236364"  
"138131""Carvedilol 6.25 MG Oral Tablet""63173""Cardiomyopathy""6""0.333333"  
"138131""Carvedilol 6.25 MG Oral Tablet""63217""Congestive Heart Failure""20""0.25974"  
"138131""Carvedilol 6.25 MG Oral Tablet""63224""Congestive Heart Failure With Systolic And Diastolic Dysfunction""2""0.4"  
"138131""Carvedilol 6.25 MG Oral Tablet""63467""Hypertension""38""0.214689"  
"138131""Carvedilol 6.25 MG Oral Tablet""63468""Essential Hypertension""23""0.338235"  
"138131""Carvedilol 6.25 MG Oral Tablet""63470""Benign Essential Hypertension""24""0.393443"  
"138131""Carvedilol 6.25 MG Oral Tablet""250862""Chronic Combined Systolic And Diastolic Congestive Heart Failure""2""0.5"  
"138131""Carvedilol 6.25 MG Oral Tablet""250918""Chronic Systolic Congestive Heart Failure""2""0.4"  
"138145""Carvedilol 3.125 MG Oral Tablet""62975""Coronary Artery Disease""24""0.303797"  
"138145""Carvedilol 3.125 MG Oral Tablet""63173""Cardiomyopathy""6""0.4"  
"138145""Carvedilol 3.125 MG Oral Tablet""63174""Dilated Cardiomyopathy""2""0.25"  
"138145""Carvedilol 3.125 MG Oral Tablet""63175""Ischemic Cardiomyopathy""2""0.222222"  
"138145""Carvedilol 3.125 MG Oral Tablet""63217""Congestive Heart Failure""10""0.204082"  
"138145""Carvedilol 3.125 MG Oral Tablet""63467""Hypertension""33""0.3"  
"138145""Carvedilol 3.125 MG Oral Tablet""63468""Essential Hypertension""15""0.3125"  
"138145""Carvedilol 3.125 MG Oral Tablet""63470""Benign Essential Hypertension""13""0.382353"  
"138145""Carvedilol 3.125 MG Oral Tablet""250874""Systolic Congestive Heart Failure""2""0.5"  
"138187""Handicap Parking""61048""Memory Lapses Or Loss""7""0.466667"  
"138187""Handicap Parking""63217""Congestive Heart Failure""2""0.333333"  
"138187""Handicap Parking""64294""Pulmonary Fibrosis""3""0.75"  
"138187""Handicap Parking""70146""Osteoarthritis""3""0.272727"  
"138187""Handicap Parking""70148""Localized Primary Osteoarthritis""2""1"  
"138187""Handicap Parking""70455""Rheumatoid Arthritis""5""0.714286"  
"138187""Handicap Parking""70472""Systemic Lupus Erythematosus""3""0.5"  
"138187""Handicap Parking""70598""Polymyositis / Dermatomyositis:"""2""1"  
"138187""Handicap Parking""70706""Ankylosing Spondylitis""2""1"  
"138187""Handicap Parking""74988""Seizure Disorder""3""0.428571"  
"138187""Handicap Parking""75172""Stroke Syndrome""2""0.285714"  
"138187""Handicap Parking""91089""Lower Back Pain""2""0.285714"  
"138187""Handicap Parking""251467""Limb Pain""4""0.666667"  
"138187""Handicap Parking""251600""Dementia""8""0.533333"  
"138187""Handicap Parking""257996""Arthritis""3""0.333333"  
"138187""Handicap Parking""278781""Lung Cancer""2""1"  
"138187""Handicap Parking""278812""Prostate Cancer""3""0.6"  
"138187""Handicap Parking""283136""Bladder Cancer""2""1"  
"138187""Handicap Parking""288944""Disturbance Of Gait""2""0.4"  
"138192""Azor 10-40 MG Oral Tablet""63467""Hypertension""5""0.3125"  
"138192""Azor 10-40 MG Oral Tablet""63468""Essential Hypertension""3""0.375"  
"138192""Azor 10-40 MG Oral Tablet""63470""Benign Essential Hypertension""4""0.571429"  
"138193""Isentress 400 MG Oral Tablet""76835""HIV Infection""22""0.666667"  
"138193""Isentress 400 MG Oral Tablet""76842""Acquired Immunodeficiency Syndrome (AIDS)""11""0.611111"  
"138193""Isentress 400 MG Oral Tablet""94386""Exposed To HIV Infection""5""0.714286"  
"138193""Isentress 400 MG Oral Tablet""293634""AIDS CDC Classification""3""1"  
"138194""Soma 250 MG Oral Tablet""288921""Chronic Pain""3""0.5"  
"138198""Diastat AcuDial 20 MG Rectal Gel""74988""Seizure Disorder""9""0.428571"  
"138198""Diastat AcuDial 20 MG Rectal Gel""252570""Partial Complex Seizure With Secondary Generalization With Intractable Seizure""2""1"

"138198"|"Diastat AcuDial 20 MG Rectal Gel"|"297231"|"Epilepsy"|"7"|"0.636364"  
"138214"|"Retrovir 50 MG/5ML Oral Syrup"|"94386"|"Exposed To HIV Infection"|"3"|"0.75"  
"138243"|"Acetaminophen 160 MG/5ML Oral Suspension"|"77891"|"Acute Upper Respiratory Infection"|"2"|"0.25"  
"138243"|"Acetaminophen 160 MG/5ML Oral Suspension"|"251528"|"Acute Otitis Media"|"2"|"0.666667"  
"138256"|"OXcarbazepine 600 MG Oral Tablet"|"74988"|"Seizure Disorder"|"10"|"0.277778"  
"138256"|"OXcarbazepine 600 MG Oral Tablet"|"74990"|"Convulsive Grand Mal Seizure With Intractable Seizure"|"2"|"0.4"  
"138256"|"OXcarbazepine 600 MG Oral Tablet"|"75001"|"Partial Complex Psychomotor Seizure"|"2"|"0.666667"  
"138256"|"OXcarbazepine 600 MG Oral Tablet"|"75002"|"Partial Complex Psychomotor Seizure With Intractable Seizure"|"22"|"0.758621"  
"138256"|"OXcarbazepine 600 MG Oral Tablet"|"76306"|"Episodic Mood Disorders"|"3"|"0.75"  
"138256"|"OXcarbazepine 600 MG Oral Tablet"|"76388"|"Bipolar Disorder NOS"|"6"|"1"  
"138256"|"OXcarbazepine 600 MG Oral Tablet"|"252552"|"Generalized Convulsive Tonic-clonic Seizure With Intractable Seizure"|"2"|"0.666667"  
"138256"|"OXcarbazepine 600 MG Oral Tablet"|"252561"|"Motor Partial Seizure With Intractable Seizure"|"2"|"1"  
"138256"|"OXcarbazepine 600 MG Oral Tablet"|"252566"|"Partial Complex Seizure"|"7"|"0.583333"  
"138256"|"OXcarbazepine 600 MG Oral Tablet"|"252569"|"Partial Complex Seizure With Secondary Generalization"|"3"|"0.375"  
"138256"|"OXcarbazepine 600 MG Oral Tablet"|"252570"|"Partial Complex Seizure With Secondary Generalization With Intractable Seizure"|"5"|"0.555556"  
"138260"|"Ofloxacin 0.3 % Otic Solution"|"62322"|"Otitis Externa"|"13"|"0.65"  
"138260"|"Ofloxacin 0.3 % Otic Solution"|"62329"|"Acute Otitis Externa"|"10"|"0.588235"  
"138260"|"Ofloxacin 0.3 % Otic Solution"|"62336"|"Otitis Externa Of The Right Ear"|"2"|"1"  
"138260"|"Ofloxacin 0.3 % Otic Solution"|"62344"|"Acute Suppurative Otitis Media"|"5"|"0.454545"  
"138260"|"Ofloxacin 0.3 % Otic Solution"|"62345"|"Acute Suppurative Otitis Media With Spontaneous Rupture Of The Ear Drum"|"8"|"0.533333"  
"138260"|"Ofloxacin 0.3 % Otic Solution"|"62350"|"Acute Serous Otitis Media"|"3"|"0.333333"  
"138260"|"Ofloxacin 0.3 % Otic Solution"|"62372"|"Chronic Suppurative Otitis Media Of The Right Ear"|"2"|"1"  
"138260"|"Ofloxacin 0.3 % Otic Solution"|"62388"|"Chronic Mucoid Otitis Media"|"4"|"0.266667"  
"138260"|"Ofloxacin 0.3 % Otic Solution"|"62391"|"Chronic Mucoid Otitis Media Of Both Ears"|"6"|"0.75"  
"138260"|"Ofloxacin 0.3 % Otic Solution"|"62409"|"Cerumen Impaction"|"5"|"0.217391"  
"138260"|"Ofloxacin 0.3 % Otic Solution"|"62497"|"Cholesteatoma Of Attic"|"2"|"1"  
"138260"|"Ofloxacin 0.3 % Otic Solution"|"62499"|"Cholesteatoma Of Middle Ear And Mastoid"|"2"|"0.333333"  
"138260"|"Ofloxacin 0.3 % Otic Solution"|"62502"|"Cholesteatoma In The Right Ear"|"2"|"0.5"  
"138260"|"Ofloxacin 0.3 % Otic Solution"|"62503"|"Cholesteatoma In The Left Ear"|"3"|"1"  
"138260"|"Ofloxacin 0.3 % Otic Solution"|"62543"|"Earache"|"2"|"0.5"  
"138260"|"Ofloxacin 0.3 % Otic Solution"|"62550"|"Tympanic Membrane Perforation"|"3"|"0.428571"  
"138260"|"Ofloxacin 0.3 % Otic Solution"|"62551"|"Central Perforation Of The Tympanic Membrane"|"4"|"0.333333"  
"138260"|"Ofloxacin 0.3 % Otic Solution"|"62561"|"Eustachian Tube Dysfunction"|"7"|"0.466667"  
"138260"|"Ofloxacin 0.3 % Otic Solution"|"86958"|"Discharge From The Ears"|"6"|"0.545455"  
"138260"|"Ofloxacin 0.3 % Otic Solution"|"251528"|"Acute Otitis Media"|"21"|"0.583333"  
"138260"|"Ofloxacin 0.3 % Otic Solution"|"251529"|"Chronic Otitis Media"|"4"|"0.266667"  
"138260"|"Ofloxacin 0.3 % Otic Solution"|"274445"|"Chronic Otitis Externa"|"4"|"0.571429"  
"138260"|"Ofloxacin 0.3 % Otic Solution"|"274471"|"Acute Otitis Externa Of The Right Ear"|"4"|"0.5"  
"138261"|"Amrix 30 MG Oral Capsule Extended Release 24 Hour"|"75717"|"Cervicalgia"|"2"|"1"  
"138265"|"Stalevo 200 50-200-200 MG Oral Tablet"|"75080"|"Parkinson's Disease"|"15"|"0.75"  
"138276"|"Azor 10-20 MG Oral Tablet"|"63470"|"Benign Essential Hypertension"|"2"|"1"  
"138281"|"TussiCaps 10-8 MG Oral Capsule Extended Release 12 Hour"|"60869"|"Cough"|"2"|"0.5"  
"138292"|"Milk of Magnesia 1200 MG/15ML Oral Suspension"|"166777"|"Constipation"|"3"|"0.5"  
"138297"|"Ciclopirox 8 % External Solution"|"70119"|"Onychomycosis"|"6"|"0.6"  
"138297"|"Ciclopirox 8 % External Solution"|"278606"|"Onychomycosis Of The Fingernails"|"3"|"1"  
"138297"|"Ciclopirox 8 % External Solution"|"278662"|"Onychomycosis Of The Right 1st Toenail"|"2"|"0.666667"  
"138298"|"OXcarbazepine 300 MG Oral Tablet"|"74988"|"Seizure Disorder"|"25"|"0.390625"  
"138298"|"OXcarbazepine 300 MG Oral Tablet"|"74990"|"Convulsive Grand Mal Seizure With Intractable

Seizure"|"4"|"1"  
"138298"|"OXcarbazepine 300 MG Oral Tablet"|"75000"|"Partial Simple Seizure With Intractable Seizure"|"3"|"0.375"  
"138298"|"OXcarbazepine 300 MG Oral Tablet"|"75001"|"Partial Complex Psychomotor Seizure"|"7"|"0.777778"  
"138298"|"OXcarbazepine 300 MG Oral Tablet"|"75002"|"Partial Complex Psychomotor Seizure With Intractable Seizure"|"22"|"0.709677"  
"138298"|"OXcarbazepine 300 MG Oral Tablet"|"75929"|"Mood Disorder Due To General Medical Condition"|"3"|"1"  
"138298"|"OXcarbazepine 300 MG Oral Tablet"|"76272"|"Schizoaffective Disorder"|"2"|"1"  
"138298"|"OXcarbazepine 300 MG Oral Tablet"|"76307"|"Bipolar Disorder"|"4"|"0.444444"  
"138298"|"OXcarbazepine 300 MG Oral Tablet"|"76327"|"Bipolar I Disorder, Most Recent Episode, Mixed Severe With Psychotic Features"|"2"|"1"  
"138298"|"OXcarbazepine 300 MG Oral Tablet"|"76339"|"Bipolar I Disorder, Most Recent Episode, Depressed"|"2"|"1"  
"138298"|"OXcarbazepine 300 MG Oral Tablet"|"76348"|"Bipolar II Disorder"|"2"|"0.5"  
"138298"|"OXcarbazepine 300 MG Oral Tablet"|"76357"|"Major Depression, Recurrent"|"2"|"0.666667"  
"138298"|"OXcarbazepine 300 MG Oral Tablet"|"76388"|"Bipolar Disorder NOS"|"7"|"0.875"  
"138298"|"OXcarbazepine 300 MG Oral Tablet"|"252546"|"Generalized Convulsive Seizure"|"3"|"0.3"  
"138298"|"OXcarbazepine 300 MG Oral Tablet"|"252550"|"Generalized Convulsive Tonic Seizure With Intractable Seizure"|"2"|"1"  
"138298"|"OXcarbazepine 300 MG Oral Tablet"|"252551"|"Generalized Convulsive Tonic-clonic Seizure"|"2"|"0.666667"  
"138298"|"OXcarbazepine 300 MG Oral Tablet"|"252552"|"Generalized Convulsive Tonic-clonic Seizure With Intractable Seizure"|"3"|"0.6"  
"138298"|"OXcarbazepine 300 MG Oral Tablet"|"252566"|"Partial Complex Seizure"|"12"|"0.705882"  
"138298"|"OXcarbazepine 300 MG Oral Tablet"|"252569"|"Partial Complex Seizure With Secondary Generalization"|"2"|"0.285714"  
"138298"|"OXcarbazepine 300 MG Oral Tablet"|"252570"|"Partial Complex Seizure With Secondary Generalization With Intractable Seizure"|"11"|"0.647059"  
"138298"|"OXcarbazepine 300 MG Oral Tablet"|"297231"|"Epilepsy"|"4"|"0.5"  
"138300"|"Exelon 9.5 MG/24HR Transdermal Patch 24 Hour"|"61048"|"Memory Lapses Or Loss"|"6"|"0.545455"  
"138300"|"Exelon 9.5 MG/24HR Transdermal Patch 24 Hour"|"75020"|"Alzheimer's Disease"|"9"|"0.45"  
"138300"|"Exelon 9.5 MG/24HR Transdermal Patch 24 Hour"|"75032"|"Vascular Dementia"|"5"|"0.625"  
"138300"|"Exelon 9.5 MG/24HR Transdermal Patch 24 Hour"|"251600"|"Dementia"|"13"|"0.5"  
"138303"|"Somatuline Depot 120 MG/0.5ML Subcutaneous Solution"|"258894"|"Acromegaly"|"2"|"1"  
"138307"|"Diastat AcuDial 10 MG Rectal Gel"|"67888"|"Convulsions In Newborn"|"2"|"0.333333"  
"138307"|"Diastat AcuDial 10 MG Rectal Gel"|"74988"|"Seizure Disorder"|"53"|"0.576087"  
"138307"|"Diastat AcuDial 10 MG Rectal Gel"|"75001"|"Partial Complex Psychomotor Seizure"|"2"|"0.4"  
"138307"|"Diastat AcuDial 10 MG Rectal Gel"|"75002"|"Partial Complex Psychomotor Seizure With Intractable Seizure"|"7"|"0.7"  
"138307"|"Diastat AcuDial 10 MG Rectal Gel"|"252546"|"Generalized Convulsive Seizure"|"2"|"0.5"  
"138307"|"Diastat AcuDial 10 MG Rectal Gel"|"252547"|"Generalized Convulsive Clonic Seizure"|"2"|"1"  
"138307"|"Diastat AcuDial 10 MG Rectal Gel"|"252552"|"Generalized Convulsive Tonic-clonic Seizure With Intractable Seizure"|"3"|"1"  
"138307"|"Diastat AcuDial 10 MG Rectal Gel"|"252566"|"Partial Complex Seizure"|"2"|"0.5"  
"138307"|"Diastat AcuDial 10 MG Rectal Gel"|"288823"|"Lennox-Gastaut Syndrome"|"3"|"0.428571"  
"138307"|"Diastat AcuDial 10 MG Rectal Gel"|"297231"|"Epilepsy"|"12"|"0.631579"  
"138315"|"Diastat Pediatric 2.5 MG Rectal Gel"|"74988"|"Seizure Disorder"|"11"|"0.6875"  
"138316"|"OXcarbazepine 150 MG Oral Tablet"|"74988"|"Seizure Disorder"|"11"|"0.333333"  
"138316"|"OXcarbazepine 150 MG Oral Tablet"|"75002"|"Partial Complex Psychomotor Seizure With Intractable Seizure"|"4"|"0.333333"  
"138316"|"OXcarbazepine 150 MG Oral Tablet"|"75125"|"Multiple Sclerosis"|"2"|"0.25"  
"138316"|"OXcarbazepine 150 MG Oral Tablet"|"75486"|"Trigeminal Neuralgia"|"3"|"0.6"  
"138316"|"OXcarbazepine 150 MG Oral Tablet"|"76307"|"Bipolar Disorder"|"3"|"0.3"  
"138316"|"OXcarbazepine 150 MG Oral Tablet"|"76327"|"Bipolar I Disorder, Most Recent Episode, Mixed Severe With Psychotic Features"|"2"|"1"

"138316"|"OXcarbazepine 150 MG Oral Tablet"|"76348"|"Bipolar II Disorder"|"4"|"0.8"  
"138316"|"OXcarbazepine 150 MG Oral Tablet"|"76388"|"Bipolar Disorder NOS"|"13"|"0.866667"  
"138316"|"OXcarbazepine 150 MG Oral Tablet"|"76431"|"Borderline Personality Disorder"|"2"|"0.25"  
"138316"|"OXcarbazepine 150 MG Oral Tablet"|"252566"|"Partial Complex Seizure"|"7"|"0.583333"  
"138316"|"OXcarbazepine 150 MG Oral Tablet"|"252570"|"Partial Complex Seizure With Secondary Generalization With Intractable Seizure"|"3"|"0.6"  
"138330"|"Albuterol Sulfate 0.63 MG/3ML Inhalation Nebulization Solution"|"64180"|"Reactive Airway Disease"|"3"|"0.6"  
"138330"|"Albuterol Sulfate 0.63 MG/3ML Inhalation Nebulization Solution"|"64181"|"Asthma"|"12"|"0.461538"  
"138330"|"Albuterol Sulfate 0.63 MG/3ML Inhalation Nebulization Solution"|"64205"|"Chronic Obstructive Pulmonary Disease"|"2"|"0.285714"  
"138332"|"Azor 5-40 MG Oral Tablet"|"63467"|"Hypertension"|"2"|"0.285714"  
"138342"|"Azor 5-20 MG Oral Tablet"|"63468"|"Essential Hypertension"|"3"|"0.5"  
"138342"|"Azor 5-20 MG Oral Tablet"|"63470"|"Benign Essential Hypertension"|"3"|"0.75"  
"138346"|"Exelon 4.6 MG/24HR Transdermal Patch 24 Hour"|"61048"|"Memory Lapses Or Loss"|"6"|"0.461538"  
"138346"|"Exelon 4.6 MG/24HR Transdermal Patch 24 Hour"|"75020"|"Alzheimer's Disease"|"6"|"0.461538"  
"138346"|"Exelon 4.6 MG/24HR Transdermal Patch 24 Hour"|"75032"|"Vascular Dementia"|"2"|"0.5"  
"138346"|"Exelon 4.6 MG/24HR Transdermal Patch 24 Hour"|"75080"|"Parkinson's Disease"|"4"|"0.4"  
"138346"|"Exelon 4.6 MG/24HR Transdermal Patch 24 Hour"|"251600"|"Dementia"|"9"|"0.391304"  
"138351"|"Amrix 15 MG Oral Capsule Extended Release 24 Hour"|"70704"|"Symmetric Polyarticular Inflammation"|"2"|"1"  
"138351"|"Amrix 15 MG Oral Capsule Extended Release 24 Hour"|"73464"|"Lower Back Sprain"|"2"|"1"  
"138351"|"Amrix 15 MG Oral Capsule Extended Release 24 Hour"|"74530"|"Tension-type Headache"|"2"|"1"  
"138351"|"Amrix 15 MG Oral Capsule Extended Release 24 Hour"|"75728"|"Sciatica"|"2"|"0.666667"  
"138351"|"Amrix 15 MG Oral Capsule Extended Release 24 Hour"|"75811"|"Muscle Spasm"|"3"|"0.333333"  
"138351"|"Amrix 15 MG Oral Capsule Extended Release 24 Hour"|"85691"|"Neck Pain"|"3"|"0.6"  
"138351"|"Amrix 15 MG Oral Capsule Extended Release 24 Hour"|"91079"|"Midback Pain"|"2"|"1"  
"138351"|"Amrix 15 MG Oral Capsule Extended Release 24 Hour"|"91089"|"Lower Back Pain"|"3"|"0.375"  
"138351"|"Amrix 15 MG Oral Capsule Extended Release 24 Hour"|"115846"|"Back Muscle Spasm"|"2"|"0.666667"  
"138361"|"Corvite 150 150-1.25 MG Oral Tablet"|"31788"|"Multiple Gestation - Twins"|"2"|"1"  
"138361"|"Corvite 150 150-1.25 MG Oral Tablet"|"66444"|"Pregnancy Complicated By Anemia"|"65"|"0.915493"  
"138361"|"Corvite 150 150-1.25 MG Oral Tablet"|"77962"|"Anemia"|"109"|"0.900826"  
"138361"|"Corvite 150 150-1.25 MG Oral Tablet"|"77968"|"Iron Deficiency"|"8"|"0.888889"  
"138361"|"Corvite 150 150-1.25 MG Oral Tablet"|"78012"|"Sickle Cell Trait"|"2"|"0.333333"  
"138361"|"Corvite 150 150-1.25 MG Oral Tablet"|"288609"|"Menometrorrhagia"|"2"|"0.666667"  
"138364"|"MethylPREDNISolone 16 MG Oral Tablet"|"70472"|"Systemic Lupus Erythematosus"|"2"|"1"  
"138373"|"Acetaminophen 325 MG/10.15ML Oral Suspension"|"77890"|"Upper Respiratory Infection"|"2"|"0.4"  
"138373"|"Acetaminophen 325 MG/10.15ML Oral Suspension"|"251528"|"Acute Otitis Media"|"2"|"0.222222"  
"138392"|"Apidra 100 UNIT/ML Injection Solution"|"69388"|"Type I Diabetes Mellitus - Uncontrolled"|"2"|"0.4"  
"138392"|"Apidra 100 UNIT/ML Injection Solution"|"69402"|"Diabetes Mellitus Poorly Controlled"|"4"|"0.8"  
"138416"|"Vitamin D 1000 UNIT Oral Tablet"|"68058"|"Vitamin D Deficiency"|"3"|"0.166667"  
"138416"|"Vitamin D 1000 UNIT Oral Tablet"|"69340"|"Osteopenia"|"2"|"0.285714"  
"138593"|"MyKidz Iron 10 15 MG/1.5ML Oral Suspension"|"77962"|"Anemia"|"7"|"1"  
"138605"|"Duac CS 1-5 % KIT"|"69606"|"Acne"|"2"|"1"  
"138614"|"Lansoprazole Powder"|"64688"|"Esophageal Reflux"|"33"|"0.75"  
"138614"|"Lansoprazole Powder"|"191631"|"Gastrostomy Care"|"4"|"0.25"  
"138614"|"Lansoprazole Powder"|"278172"|"Infant Feeding Problems"|"2"|"0.333333"  
"138615"|"CitraNatal 90 DHA 90-1 & 250 MG MISC"|"97487"|"Planning To Become Pregnant"|"3"|"0.6"  
"138622"|"Tamiflu 45 MG Oral Capsule"|"64119"|"Influenza"|"2"|"1"  
"138668"|"Ranitidine 75 75 MG Oral Tablet"|"64688"|"Esophageal Reflux"|"4"|"1"  
"138680"|"Bismuth Subsalicylate 262 MG Oral Tablet Chewable"|"76976"|"Helicobacter Pylori (H. Pylori) Infection"|"2"|"1"  
"138696"|"Kaletra 100-25 MG Oral Tablet"|"76835"|"HIV Infection"|"5"|"0.833333"  
"138705"|"Senna 15 MG Oral Tablet"|"166777"|"Constipation"|"2"|"0.666667"

"139063"|"BiPAP"|"173466"|"Obstructive Sleep Apnea"|"9"|"0.6"  
"139074"|"HumaLOG Mix 75/25 KwikPen 75-25 % Subcutaneous Suspension"|"69380"|"Diabetes Mellitus"|"4"|"0.111111"  
"139074"|"HumaLOG Mix 75/25 KwikPen 75-25 % Subcutaneous Suspension"|"69381"|"Type II Diabetes Mellitus"|"5"|"0.208333"  
"139074"|"HumaLOG Mix 75/25 KwikPen 75-25 % Subcutaneous Suspension"|"69388"|"Type I Diabetes Mellitus - Uncontrolled"|"4"|"0.8"  
"139074"|"HumaLOG Mix 75/25 KwikPen 75-25 % Subcutaneous Suspension"|"69402"|"Diabetes Mellitus Poorly Controlled"|"40"|"0.833333"  
"139104"|"Renvela 800 MG Oral Tablet"|"69353"|"Secondary Hyperparathyroidism"|"2"|"0.4"  
"139104"|"Renvela 800 MG Oral Tablet"|"80847"|"Renal Cell Carcinoma"|"2"|"0.666667"  
"139104"|"Renvela 800 MG Oral Tablet"|"258937"|"Renal Secondary Hyperparathyroidism"|"3"|"0.272727"  
"139104"|"Renvela 800 MG Oral Tablet"|"274640"|"Chronic Kidney Disease, Stage 5"|"4"|"0.571429"  
"139104"|"Renvela 800 MG Oral Tablet"|"274672"|"Chronic Kidney Disease, Stage 4"|"3"|"0.230769"  
"139104"|"Renvela 800 MG Oral Tablet"|"296780"|"Hyperphosphatemia"|"2"|"0.4"  
"139110"|"Balsalazide Disodium 750 MG Oral Capsule"|"64980"|"Crohn's Disease"|"3"|"0.75"  
"139110"|"Balsalazide Disodium 750 MG Oral Capsule"|"65041"|"Ulcerative Colitis"|"2"|"0.5"  
"139111"|"Fluticasone Propionate Powder"|"62577"|"Sinusitis"|"2"|"0.666667"  
"139111"|"Fluticasone Propionate Powder"|"62585"|"Chronic Sinusitis"|"4"|"0.210526"  
"139111"|"Fluticasone Propionate Powder"|"62586"|"Chronic Maxillary Sinusitis"|"32"|"0.336842"  
"139111"|"Fluticasone Propionate Powder"|"62587"|"Chronic Frontal Sinusitis"|"24"|"0.269663"  
"139111"|"Fluticasone Propionate Powder"|"62588"|"Chronic Ethmoidal Sinusitis"|"67"|"0.62037"  
"139111"|"Fluticasone Propionate Powder"|"62590"|"Chronic Pansinusitis"|"6"|"0.666667"  
"139111"|"Fluticasone Propionate Powder"|"62591"|"Nasal Polyps"|"7"|"0.166667"  
"139111"|"Fluticasone Propionate Powder"|"77265"|"Phaeophycomycosis"|"3"|"0.333333"  
"139114"|"Intelence 100 MG Oral Tablet"|"76835"|"HIV Infection"|"9"|"0.818182"  
"139114"|"Intelence 100 MG Oral Tablet"|"76842"|"Acquired Immunodeficiency Syndrome (AIDS)"|"2"|"0.5"  
"139117"|"Cetirizine HCl 5 MG Oral Tablet"|"62598"|"Allergic Rhinitis"|"4"|"1"  
"139118"|"Cetirizine HCl 10 MG Oral Tablet"|"62598"|"Allergic Rhinitis"|"99"|"0.707143"  
"139118"|"Cetirizine HCl 10 MG Oral Tablet"|"62611"|"Chronic Rhinitis"|"2"|"0.333333"  
"139118"|"Cetirizine HCl 10 MG Oral Tablet"|"64181"|"Asthma"|"18"|"0.195652"  
"139118"|"Cetirizine HCl 10 MG Oral Tablet"|"77891"|"Acute Upper Respiratory Infection"|"7"|"0.205882"  
"139118"|"Cetirizine HCl 10 MG Oral Tablet"|"257912"|"Disorder Of Mitochondrial Metabolism"|"2"|"0.4"  
"139118"|"Cetirizine HCl 10 MG Oral Tablet"|"258010"|"Allergic Reaction"|"2"|"1"  
"139120"|"Pantoprazole Sodium 40 MG Oral Tablet Delayed Release"|"60891"|"Heartburn"|"6"|"0.5"  
"139120"|"Pantoprazole Sodium 40 MG Oral Tablet Delayed Release"|"60894"|"Nausea (Symptom)"|"3"|"0.214286"  
"139120"|"Pantoprazole Sodium 40 MG Oral Tablet Delayed Release"|"60899"|"Abdominal Pain"|"6"|"0.181818"  
"139120"|"Pantoprazole Sodium 40 MG Oral Tablet Delayed Release"|"64678"|"Esophagitis"|"2"|"0.285714"  
"139120"|"Pantoprazole Sodium 40 MG Oral Tablet Delayed Release"|"64680"|"Chronic Reflux Esophagitis"|"24"|"0.461538"  
"139120"|"Pantoprazole Sodium 40 MG Oral Tablet Delayed Release"|"64688"|"Esophageal Reflux"|"96"|"0.561404"  
"139120"|"Pantoprazole Sodium 40 MG Oral Tablet Delayed Release"|"64762"|"Dyspepsia"|"2"|"0.285714"  
"139120"|"Pantoprazole Sodium 40 MG Oral Tablet Delayed Release"|"64763"|"Gastritis"|"8"|"0.307692"  
"139120"|"Pantoprazole Sodium 40 MG Oral Tablet Delayed Release"|"64764"|"Gastritis Due To H. Pylori"|"2"|"1"  
"139120"|"Pantoprazole Sodium 40 MG Oral Tablet Delayed Release"|"64825"|"Peptic Ulcer"|"4"|"0.235294"  
"139120"|"Pantoprazole Sodium 40 MG Oral Tablet Delayed Release"|"64826"|"Gastric Ulcer"|"2"|"0.285714"  
"139120"|"Pantoprazole Sodium 40 MG Oral Tablet Delayed Release"|"64980"|"Crohn's Disease"|"3"|"0.5"  
"139120"|"Pantoprazole Sodium 40 MG Oral Tablet Delayed Release"|"70455"|"Rheumatoid Arthritis"|"4"|"0.285714"  
"139120"|"Pantoprazole Sodium 40 MG Oral Tablet Delayed Release"|"70475"|"Scleroderma"|"5"|"0.454545"  
"139120"|"Pantoprazole Sodium 40 MG Oral Tablet Delayed Release"|"70706"|"Ankylosing Spondylitis"|"2"|"0.4"  
"139120"|"Pantoprazole Sodium 40 MG Oral Tablet Delayed Release"|"80847"|"Renal Cell Carcinoma"|"5"|"0.454545"  
"139120"|"Pantoprazole Sodium 40 MG Oral Tablet Delayed Release"|"87736"|"Abdominal Pain In The Central Upper Belly (Epigastric)"|"2"|"0.333333"  
"139120"|"Pantoprazole Sodium 40 MG Oral Tablet Delayed Release"|"258733"|"Bloating (Symptom)"|"3"|"1"

"139120""Pantoprazole Sodium 40 MG Oral Tablet Delayed Release""260898""Kidney Cancer""4""0.571429"  
"139120""Pantoprazole Sodium 40 MG Oral Tablet Delayed Release""278812""Prostate Cancer""5""0.277778"  
"139120""Pantoprazole Sodium 40 MG Oral Tablet Delayed Release""282704""Acute Gastritis""2""0.666667"  
"139120""Pantoprazole Sodium 40 MG Oral Tablet Delayed Release""289114""Laryngopharyngeal Reflux""2""0.4"  
"139134""Ramipril 2.5 MG Oral Capsule""34588""Proteinuria""2""0.4"  
"139134""Ramipril 2.5 MG Oral Capsule""62916""Atrial Fibrillation""2""0.222222"  
"139134""Ramipril 2.5 MG Oral Capsule""62975""Coronary Artery Disease""4""0.266667"  
"139134""Ramipril 2.5 MG Oral Capsule""63467""Hypertension""8""0.242424"  
"139134""Ramipril 2.5 MG Oral Capsule""63468""Essential Hypertension""6""0.428571"  
"139134""Ramipril 2.5 MG Oral Capsule""69387""Type I Diabetes Mellitus""2""0.666667"  
"139134""Ramipril 2.5 MG Oral Capsule""69388""Type I Diabetes Mellitus - Uncontrolled""6""0.857143"  
"139142""Dextromethorphan-Guaifenesin 10-100 MG/5ML Oral Syrup""60869""Cough""4""0.8"  
"139142""Dextromethorphan-Guaifenesin 10-100 MG/5ML Oral Syrup""77891""Acute Upper Respiratory Infection""2""0.285714"  
"139163""Nutropin AQ Pen 20 MG/2ML Subcutaneous Solution""292025""Short Stature""3""0.5"  
"139164""ZyrTEC Childrens Allergy 5 MG Oral Tablet Chewable""62598""Allergic Rhinitis""2""0.666667"  
"139199""Methylphenidate HCl 10 MG Oral Tablet Extended Release""275486""ADHD, Combined Type""2""1"  
"139200""Cleocin 75 MG/5ML Oral Solution Reconstituted""61321""Stye""2""1"  
"139201""Ramipril 5 MG Oral Capsule""62975""Coronary Artery Disease""3""0.111111"  
"139201""Ramipril 5 MG Oral Capsule""63217""Congestive Heart Failure""3""0.428571"  
"139201""Ramipril 5 MG Oral Capsule""63467""Hypertension""26""0.325"  
"139201""Ramipril 5 MG Oral Capsule""63468""Essential Hypertension""16""0.484848"  
"139201""Ramipril 5 MG Oral Capsule""63470""Benign Essential Hypertension""10""0.47619"  
"139201""Ramipril 5 MG Oral Capsule""69388""Type I Diabetes Mellitus - Uncontrolled""5""0.333333"  
"139201""Ramipril 5 MG Oral Capsule""274717""Microalbuminuria""3""0.333333"  
"139202""Ramipril 10 MG Oral Capsule""34588""Proteinuria""3""0.2"  
"139202""Ramipril 10 MG Oral Capsule""62975""Coronary Artery Disease""5""0.147059"  
"139202""Ramipril 10 MG Oral Capsule""63217""Congestive Heart Failure""3""0.166667"  
"139202""Ramipril 10 MG Oral Capsule""63467""Hypertension""55""0.392857"  
"139202""Ramipril 10 MG Oral Capsule""63468""Essential Hypertension""48""0.564706"  
"139202""Ramipril 10 MG Oral Capsule""63470""Benign Essential Hypertension""14""0.388889"  
"139202""Ramipril 10 MG Oral Capsule""69381""Type II Diabetes Mellitus""6""0.130435"  
"139202""Ramipril 10 MG Oral Capsule""69388""Type I Diabetes Mellitus - Uncontrolled""9""0.310345"  
"139203""Cetirizine HCl 5 MG Oral Tablet Chewable""62597""Rhinitis""2""0.666667"  
"139203""Cetirizine HCl 5 MG Oral Tablet Chewable""62598""Allergic Rhinitis""27""0.642857"  
"139203""Cetirizine HCl 5 MG Oral Tablet Chewable""93702""Allergies""2""0.2"  
"139204""Cetirizine HCl 10 MG Oral Tablet Chewable""62598""Allergic Rhinitis""14""0.5"  
"139204""Cetirizine HCl 10 MG Oral Tablet Chewable""69710""Contact Dermatitis""2""1"  
"139219""HumaLOG KwikPen 100 UNIT/ML Subcutaneous Solution""69380""Diabetes Mellitus""12""0.162162"  
"139219""HumaLOG KwikPen 100 UNIT/ML Subcutaneous Solution""69381""Type II Diabetes Mellitus""5""0.147059"  
"139219""HumaLOG KwikPen 100 UNIT/ML Subcutaneous Solution""69382""Type II Diabetes Mellitus - Uncomplicated, Uncontrolled""2""0.25"  
"139219""HumaLOG KwikPen 100 UNIT/ML Subcutaneous Solution""69387""Type I Diabetes Mellitus""8""0.470588"  
"139219""HumaLOG KwikPen 100 UNIT/ML Subcutaneous Solution""69388""Type I Diabetes Mellitus - Uncontrolled""36""0.818182"  
"139219""HumaLOG KwikPen 100 UNIT/ML Subcutaneous Solution""69402""Diabetes Mellitus Poorly Controlled""56""0.767123"  
"139258""Tekturna HCT 150-25 MG Oral Tablet""63467""Hypertension""2""0.4"  
"139259""Tekturna HCT 300-12.5 MG Oral Tablet""63467""Hypertension""2""0.666667"  
"139262""Pantoprazole Sodium 20 MG Oral Tablet Delayed Release""64680""Chronic Reflux Esophagitis""4""0.8"  
"139262""Pantoprazole Sodium 20 MG Oral Tablet Delayed Release""64688""Esophageal Reflux""10""0.526316"  
"139268""NovoFine 30G X 8 MM Miscellaneous""67687""Growth Hormone Deficiency (Pituitary

Dwarfism)"|2|"1"  
"139268|"NovoFine 30G X 8 MM Miscellaneous|"69402|"Diabetes Mellitus Poorly Controlled|"2|"0.5"  
"139280|"Bystolic 2.5 MG Oral Tablet|"62975|"Coronary Artery Disease|"5|"0.454545"  
"139280|"Bystolic 2.5 MG Oral Tablet|"63470|"Benign Essential Hypertension|"3|"0.333333"  
"139281|"Bystolic 5 MG Oral Tablet|"62916|"Atrial Fibrillation|"2|"0.2"  
"139281|"Bystolic 5 MG Oral Tablet|"62975|"Coronary Artery Disease|"6|"0.162162"  
"139281|"Bystolic 5 MG Oral Tablet|"62984|"Atypical Chest Pain|"2|"0.285714"  
"139281|"Bystolic 5 MG Oral Tablet|"63467|"Hypertension|"27|"0.241071"  
"139281|"Bystolic 5 MG Oral Tablet|"63468|"Essential Hypertension|"13|"0.433333"  
"139281|"Bystolic 5 MG Oral Tablet|"63470|"Benign Essential Hypertension|"16|"0.457143"  
"139281|"Bystolic 5 MG Oral Tablet|"282270|"Palpitations|"2|"0.25"  
"139282|"Bystolic 10 MG Oral Tablet|"62975|"Coronary Artery Disease|"8|"0.210526"  
"139282|"Bystolic 10 MG Oral Tablet|"63294|"Prolapsing Mitral Valve Leaflet Syndrome|"2|"0.2"  
"139282|"Bystolic 10 MG Oral Tablet|"63467|"Hypertension|"28|"0.325581"  
"139282|"Bystolic 10 MG Oral Tablet|"63468|"Essential Hypertension|"22|"0.628571"  
"139282|"Bystolic 10 MG Oral Tablet|"63470|"Benign Essential Hypertension|"13|"0.448276"  
"139527|"Alendronate Sodium 70 MG Oral Tablet|"69340|"Osteopenia|"40|"0.555556"  
"139527|"Alendronate Sodium 70 MG Oral Tablet|"69341|"Osteoporosis|"160|"0.744186"  
"139527|"Alendronate Sodium 70 MG Oral Tablet|"69342|"Postmenopausal Osteoporosis|"10|"0.666667"  
"139527|"Alendronate Sodium 70 MG Oral Tablet|"69343|"Osteoporosis Senile|"2|"0.666667"  
"139527|"Alendronate Sodium 70 MG Oral Tablet|"69346|"Drug-induced Osteoporosis|"2|"0.666667"  
"139527|"Alendronate Sodium 70 MG Oral Tablet|"70146|"Osteoarthritis|"3|"0.1"  
"139527|"Alendronate Sodium 70 MG Oral Tablet|"70455|"Rheumatoid Arthritis|"6|"0.113208"  
"139527|"Alendronate Sodium 70 MG Oral Tablet|"80830|"Malignant Neoplasm Of The Prostate Gland|"2|"0.4"  
"139530|"Cefuroxime Axetil 125 MG/5ML Oral Suspension Reconstituted|"251528|"Acute Otitis Media|"2|"1"  
"139532|"All Day Allergy 10 MG Oral Tablet|"62598|"Allergic Rhinitis|"2|"1"  
"139533|"Alendronate Sodium 35 MG Oral Tablet|"69340|"Osteopenia|"13|"0.684211"  
"139533|"Alendronate Sodium 35 MG Oral Tablet|"69341|"Osteoporosis|"9|"0.529412"  
"139533|"Alendronate Sodium 35 MG Oral Tablet|"70146|"Osteoarthritis|"2|"0.4"  
"139593|"Elite OB with DHA 28-1.25-200 MG Oral Capsule|"274406|"Pregnancy Test Positive|"4|"1"  
"139662|"Simcor 750-20 MG Oral Tablet Extended Release 24 Hour|"67970|"Hyperlipidemia|"2|"1"  
"139673|"Cialis 2.5 MG Oral Tablet|"76651|"Male Erectile Disorder|"5|"0.625"  
"139674|"Simcor 500-20 MG Oral Tablet Extended Release 24 Hour|"67970|"Hyperlipidemia|"4|"0.266667"  
"139674|"Simcor 500-20 MG Oral Tablet Extended Release 24 Hour|"291485|"Dyslipidemia|"3|"0.6"  
"139679|"Simcor 1000-20 MG Oral Tablet Extended Release 24 Hour|"67970|"Hyperlipidemia|"3|"0.428571"  
"139679|"Simcor 1000-20 MG Oral Tablet Extended Release 24 Hour|"291485|"Dyslipidemia|"2|"1"  
"139706|"Physical Therapy|"31947|"Lumbago|"2|"0.285714"  
"139706|"Physical Therapy|"70146|"Osteoarthritis|"10|"0.47619"  
"139706|"Physical Therapy|"70193|"Localized Osteoarthritis Of The Knee|"4|"0.571429"  
"139706|"Physical Therapy|"70198|"Generalized Osteoarthritis Of Multiple Sites|"2|"0.333333"  
"139706|"Physical Therapy|"70219|"Osteoarthritis Of The Knee|"6|"0.6"  
"139706|"Physical Therapy|"70221|"Osteoarthritis Of Multiple Sites|"3|"0.75"  
"139706|"Physical Therapy|"70455|"Rheumatoid Arthritis|"20|"0.606061"  
"139706|"Physical Therapy|"70598|"Polymyositis / Dermatomyositis:|"4|"0.571429"  
"139706|"Physical Therapy|"70706|"Ankylosing Spondylitis|"4|"0.5"  
"139706|"Physical Therapy|"70719|"Psoriatic Arthropathy|"2|"0.666667"  
"139706|"Physical Therapy|"73557|"Adhesive Capsulitis Of Shoulder|"3|"1"  
"139706|"Physical Therapy|"73599|"Trochanteric Bursitis|"2|"0.25"  
"139706|"Physical Therapy|"73666|"Backache|"9|"0.391304"  
"139706|"Physical Therapy|"75080|"Parkinson's Disease|"6|"0.857143"  
"139706|"Physical Therapy|"75125|"Multiple Sclerosis|"3|"0.428571"  
"139706|"Physical Therapy|"75579|"Spondylosis Without Myelopathy|"3|"1"  
"139706|"Physical Therapy|"85623|"Joint Pain, Localized In The Knee|"7|"0.388889"  
"139706|"Physical Therapy|"85658|"Diffuse Joint Pains (Arthralgias)"|"2|"1"

"139706""Physical Therapy""85701""Joint Pain, Localized In The Shoulder""3""0.375"  
"139706""Physical Therapy""91089""Lower Back Pain""8""0.307692"  
"139706""Physical Therapy""97011""A Fall""2""0.285714"  
"139706""Physical Therapy""165529""Hypotonicity (Flaccid)""4""0.571429"  
"139706""Physical Therapy""173419""Cervical Radiculopathy""2""0.5"  
"139706""Physical Therapy""173442""Lumbar Radiculopathy""3""0.5"  
"139706""Physical Therapy""257912""Disorder Of Mitochondrial Metabolism""7""0.636364"  
"139706""Physical Therapy""258750""Muscle Weakness""4""0.571429"  
"139706""Physical Therapy""276403""Muscle Weakness Generalized""5""1"  
"139706""Physical Therapy""278685""Arthralgias In Multiple Sites""3""0.428571"  
"139706""Physical Therapy""288944""Disturbance Of Gait""4""0.8"  
"139706""Physical Therapy""288977""Fibromyalgia""8""0.421053"  
"139706""Physical Therapy""292512""Piriformis Syndrome""4""0.5"  
"139707""Speech Therapy""257912""Disorder Of Mitochondrial Metabolism""2""0.4"  
"139708""Occupational Therapy""70146""Osteoarthritis""2""0.666667"  
"139708""Occupational Therapy""70455""Rheumatoid Arthritis""5""0.454545"  
"139708""Occupational Therapy""257912""Disorder Of Mitochondrial Metabolism""3""0.6"  
"139708""Occupational Therapy""278685""Arthralgias In Multiple Sites""2""1"  
"139709""Home Health""61065""Abnormality Of Walk""2""0.666667"  
"139709""Home Health""64205""Chronic Obstructive Pulmonary Disease""2""0.4"  
"139709""Home Health""77962""Anemia""3""0.3"  
"139709""Home Health""251600""Dementia""2""0.285714"  
"139709""Home Health""288944""Disturbance Of Gait""2""0.5"  
"139723""Protonix 40 MG Oral Packet""64680""Chronic Reflux Esophagitis""3""0.75"  
"140106""BD Integra Syringe 23G X 1\3 ML Miscellaneous""69588""Hypogonadism""3""1"  
"140106""BD Integra Syringe 23G X 1\3 ML Miscellaneous""168513""Hypogonadotrophic Hypogonadism""4""1"  
"140117""BD Eclipse Syringe 23G X 1\3 ML Miscellaneous""69588""Hypogonadism""3""0.75"  
"140117""BD Eclipse Syringe 23G X 1\3 ML Miscellaneous""168513""Hypogonadotrophic Hypogonadism""3""1"  
"140130""BD Insulin Syringe 31G X 5/16\0.3 ML Miscellaneous""69380""Diabetes Mellitus""6""0.6"  
"140130""BD Insulin Syringe 31G X 5/16\0.3 ML Miscellaneous""69381""Type II Diabetes Mellitus""2""0.666667"  
"140130""BD Insulin Syringe 31G X 5/16\0.3 ML Miscellaneous""69387""Type I Diabetes Mellitus""3""0.75"  
"140136""BD Pen Needle Ultrafine 29G X 12.7MM Miscellaneous""69380""Diabetes Mellitus""4""0.16"  
"140136""BD Pen Needle Ultrafine 29G X 12.7MM Miscellaneous""69381""Type II Diabetes Mellitus""3""0.214286"  
"140136""BD Pen Needle Ultrafine 29G X 12.7MM Miscellaneous""69382""Type II Diabetes Mellitus - Uncomplicated, Uncontrolled""2""0.25"  
"140136""BD Pen Needle Ultrafine 29G X 12.7MM Miscellaneous""69402""Diabetes Mellitus Poorly Controlled""17""0.708333"  
"140136""BD Pen Needle Ultrafine 29G X 12.7MM Miscellaneous""258942""Type II Diabetes Mellitus - Uncomplicated, Controlled""2""0.333333"  
"140150""BD Insulin Syringe 29G X 1/2\1 ML Miscellaneous""69380""Diabetes Mellitus""4""0.5"  
"140150""BD Insulin Syringe 29G X 1/2\1 ML Miscellaneous""69402""Diabetes Mellitus Poorly Controlled""5""0.714286"  
"140389""Lancets 30G Miscellaneous""69380""Diabetes Mellitus""3""0.130435"  
"140389""Lancets 30G Miscellaneous""69381""Type II Diabetes Mellitus""8""0.533333"  
"140389""Lancets 30G Miscellaneous""69388""Type I Diabetes Mellitus - Uncontrolled""8""0.8"  
"140389""Lancets 30G Miscellaneous""69402""Diabetes Mellitus Poorly Controlled""10""0.526316"  
"140466""Numoisyn Mouth/Throat Lozenge""62635""Salivary Secretion Disturbance: Xerostomia""5""0.833333"  
"140466""Numoisyn Mouth/Throat Lozenge""70472""Systemic Lupus Erythematosus""2""0.5"  
"140466""Numoisyn Mouth/Throat Lozenge""70475""Scleroderma""7""0.5"  
"140466""Numoisyn Mouth/Throat Lozenge""70478""Sjogren's Syndrome""22""0.814815"  
"140466""Numoisyn Mouth/Throat Lozenge""70479""Sicca Syndrome""9""0.692308"  
"140469""1st Choice Lancets Ultra Thin Miscellaneous""69380""Diabetes Mellitus""2""1"

"140781""Maxaron Forte Oral Capsule""66444""Pregnancy Complicated By Anemia""34""0.871795"  
"140781""Maxaron Forte Oral Capsule""77962""Anemia""42""0.933333"  
"140830""Zinc Oxide 40 % External Ointment""70130""Diaper Rash""3""0.6"  
"141033""Lactobacillus Extra Strength Oral Capsule""60902""Diarrhea (Symptom)""2""1"  
"141064""Acarbose 25 MG Oral Tablet""69382""Type II Diabetes Mellitus - Uncomplicated, Uncontrolled""2""1"  
"141067""Ramipril 1.25 MG Oral Capsule""69388""Type I Diabetes Mellitus - Uncontrolled""2""0.666667"  
"141089""ROPINIRole HCl 1 MG Oral Tablet""75054""Restless Legs Syndrome""4""0.5"  
"141089""ROPINIRole HCl 1 MG Oral Tablet""75080""Parkinson's Disease""2""1"  
"141257""Fish Oil Double Strength 1200 MG Oral Capsule""67970""Hyperlipidemia""4""0.571429"  
"141498""Mouthwash/Gargle Mouth/Throat Liquid""252900""Bad Breath""2""1"  
"141503""Permethrin Lice Treatment 1 % External Lotion""77808""Pediculosis Capitis""6""1"  
"141608""Senna 8.6 MG Oral Capsule""65055""Chronic Constipation""3""0.75"  
"141608""Senna 8.6 MG Oral Capsule""166777""Constipation""2""0.5"  
"141616""Iron Supplement 325 (65 Fe) MG Oral Tablet""77962""Anemia""3""0.3"  
"141616""Iron Supplement 325 (65 Fe) MG Oral Tablet""77968""Iron Deficiency""2""1"  
"141765""Pen Needles 31G X 8 MM Miscellaneous""69380""Diabetes Mellitus""17""0.257576"  
"141765""Pen Needles 31G X 8 MM Miscellaneous""69381""Type II Diabetes Mellitus""8""0.195122"  
"141765""Pen Needles 31G X 8 MM Miscellaneous""69382""Type II Diabetes Mellitus - Uncomplicated, Uncontrolled""5""0.416667"  
"141765""Pen Needles 31G X 8 MM Miscellaneous""69387""Type I Diabetes Mellitus""2""0.5"  
"141765""Pen Needles 31G X 8 MM Miscellaneous""69388""Type I Diabetes Mellitus - Uncontrolled""10""0.714286"  
"141765""Pen Needles 31G X 8 MM Miscellaneous""69402""Diabetes Mellitus Poorly Controlled""47""0.746032"  
"141766""Pen Needles 29G X 12MM Miscellaneous""69380""Diabetes Mellitus""4""0.133333"  
"141766""Pen Needles 29G X 12MM Miscellaneous""69402""Diabetes Mellitus Poorly Controlled""26""0.684211"  
"141832""Glycerin (Pediatric) 1.2 GM Rectal Suppository""65055""Chronic Constipation""2""1"  
"142005""Omeprazole 20 MG Oral Tablet Delayed Release""60899""Abdominal Pain""3""0.6"  
"142005""Omeprazole 20 MG Oral Tablet Delayed Release""64688""Esophageal Reflux""9""0.409091"  
"142033""Cimzia 2 X 200 MG Subcutaneous Kit""70455""Rheumatoid Arthritis""3""1"  
"142035""Simply Saline 0.9 % Nasal Aerosol Solution""62598""Allergic Rhinitis""2""0.5"  
"142041""MCT Pro-Cal Oral Packet""67945""Von Gierke's Disease (GSD Type I)""2""1"  
"142137""Cetirizine HCl Childrens Alrgy 1 MG/ML Oral Syrup""62598""Allergic Rhinitis""6""0.857143"  
"142191""Omega 3 1000 MG Oral Capsule""67970""Hyperlipidemia""6""0.166667"  
"142191""Omega 3 1000 MG Oral Capsule""283292""Essential Hypercholesterolemia""2""0.333333"  
"142202""Cetirizine-Pseudoephedrine 5-120 MG Oral Tablet Extended Release 12 Hour""62598""Allergic Rhinitis""11""0.785714"  
"142267""Cyto-Q 80 MG/10ML Oral Liquid""257912""Disorder Of Mitochondrial Metabolism""2""0.666667"  
"142307""Clobetasol Propionate 0.05 % External Foam""69901""Psoriasis""2""1"  
"142309""Vyvanse 20 MG Oral Capsule""75818""Attention-deficit Hyperactivity Disorder""6""1"  
"142309""Vyvanse 20 MG Oral Capsule""75819""ADHD, Predominantly Inattentive Type""3""0.6"  
"142309""Vyvanse 20 MG Oral Capsule""275486""ADHD, Combined Type""7""0.7"  
"142310""Vyvanse 40 MG Oral Capsule""75818""Attention-deficit Hyperactivity Disorder""3""0.230769"  
"142310""Vyvanse 40 MG Oral Capsule""75819""ADHD, Predominantly Inattentive Type""4""0.666667"  
"142310""Vyvanse 40 MG Oral Capsule""275486""ADHD, Combined Type""8""0.888889"  
"142310""Vyvanse 40 MG Oral Capsule""291687""Attention Deficit Disorder Without Hyperactivity""2""0.285714"  
"142311""Vyvanse 60 MG Oral Capsule""75818""Attention-deficit Hyperactivity Disorder""2""0.666667"  
"142311""Vyvanse 60 MG Oral Capsule""275486""ADHD, Combined Type""4""0.666667"  
"142315""Sular 34 MG Oral Tablet Extended Release 24 Hour""63470""Benign Essential Hypertension""3""1"  
"142316""Prezista 600 MG Oral Tablet""76835""HIV Infection""20""0.606061"  
"142316""Prezista 600 MG Oral Tablet""76842""Acquired Immunodeficiency Syndrome (AIDS)""14""0.608696"  
"142352""CefTAZidime Powder""62586""Chronic Maxillary Sinusitis""3""0.75"  
"142352""CefTAZidime Powder""62588""Chronic Ethmoidal Sinusitis""8""0.888889"  
"142362""Omnaris 50 MCG/ACT Nasal Suspension""62598""Allergic Rhinitis""17""0.53125"  
"142362""Omnaris 50 MCG/ACT Nasal Suspension""62611""Chronic Rhinitis""2""0.4"

"142362"|"Omniaris 50 MCG/ACT Nasal Suspension"|"87011"|"Drip Or Drainage Down Throat From Above"|"2"|"0.5"  
"142414"|"Zaleplon 5 MG Oral Capsule"|"61108"|"Insomnia"|"3"|"0.75"  
"142415"|"Zaleplon 10 MG Oral Capsule"|"61108"|"Insomnia"|"7"|"1"  
"142416"|"Amitiza 8 MCG Oral Capsule"|"65076"|"Irritable Bowel Syndrome"|"2"|"1"  
"142496"|"Luvox CR 100 MG Oral Capsule Extended Release 24 Hour"|"76351"|"Depression"|"2"|"0.5"  
"142496"|"Luvox CR 100 MG Oral Capsule Extended Release 24 Hour"|"76546"|"Obsessive Compulsive Disorder"|"3"|"0.75"  
"142647"|"L-Arginine 1000 MG Oral Tablet"|"257912"|"Disorder Of Mitochondrial Metabolism"|"3"|"1"  
"142717"|"Chloraseptic Gargle 1.4 % Mouth/Throat Liquid"|"62596"|"Common Cold"|"3"|"0.75"  
"142717"|"Chloraseptic Gargle 1.4 % Mouth/Throat Liquid"|"62760"|"Acute Pharyngitis"|"13"|"0.928571"  
"142717"|"Chloraseptic Gargle 1.4 % Mouth/Throat Liquid"|"77890"|"Upper Respiratory Infection"|"3"|"0.375"  
"142717"|"Chloraseptic Gargle 1.4 % Mouth/Throat Liquid"|"77891"|"Acute Upper Respiratory Infection"|"15"|"0.833333"  
"142717"|"Chloraseptic Gargle 1.4 % Mouth/Throat Liquid"|"274534"|"Acute Sore Throat"|"2"|"1"  
"142728"|"Dulcolax Milk of Magnesia 400 MG/5ML Oral Suspension"|"166777"|"Constipation"|"3"|"1"  
"143148"|"Blood Pressure Monitor/L Cuff Miscellaneous"|"63467"|"Hypertension"|"9"|"0.642857"  
"143148"|"Blood Pressure Monitor/L Cuff Miscellaneous"|"63470"|"Benign Essential Hypertension"|"2"|"0.4"  
"143222"|"FreeStyle Freedom Lite w/Device Kit"|"69380"|"Diabetes Mellitus"|"2"|"0.4"  
"143222"|"FreeStyle Freedom Lite w/Device Kit"|"69402"|"Diabetes Mellitus Poorly Controlled"|"4"|"0.8"  
"143223"|"Pristiq 50 MG Oral Tablet Extended Release 24 Hour"|"61118"|"Anxiety (Symptom)"|"2"|"0.285714"  
"143223"|"Pristiq 50 MG Oral Tablet Extended Release 24 Hour"|"75080"|"Parkinson's Disease"|"4"|"0.666667"  
"143223"|"Pristiq 50 MG Oral Tablet Extended Release 24 Hour"|"76351"|"Depression"|"8"|"0.2"  
"143223"|"Pristiq 50 MG Oral Tablet Extended Release 24 Hour"|"76357"|"Major Depression, Recurrent"|"2"|"1"  
"143223"|"Pristiq 50 MG Oral Tablet Extended Release 24 Hour"|"76587"|"Anxiety Disorder NOS"|"2"|"0.666667"  
"143224"|"Pristiq 100 MG Oral Tablet Extended Release 24 Hour"|"75080"|"Parkinson's Disease"|"2"|"1"  
"143224"|"Pristiq 100 MG Oral Tablet Extended Release 24 Hour"|"76351"|"Depression"|"7"|"0.35"  
"143224"|"Pristiq 100 MG Oral Tablet Extended Release 24 Hour"|"76357"|"Major Depression, Recurrent"|"3"|"1"  
"143226"|"Xyzal 2.5 MG/5ML Oral Solution"|"62598"|"Allergic Rhinitis"|"24"|"0.727273"  
"143226"|"Xyzal 2.5 MG/5ML Oral Solution"|"62606"|"Allergic Rhinitis Due To Dust Mite"|"2"|"1"  
"143227"|"Patanase 0.6 % Nasal Solution"|"62585"|"Chronic Sinusitis"|"3"|"0.25"  
"143227"|"Patanase 0.6 % Nasal Solution"|"62588"|"Chronic Ethmoidal Sinusitis"|"4"|"0.222222"  
"143227"|"Patanase 0.6 % Nasal Solution"|"62598"|"Allergic Rhinitis"|"20"|"0.540541"  
"143227"|"Patanase 0.6 % Nasal Solution"|"62606"|"Allergic Rhinitis Due To Dust Mite"|"2"|"1"  
"143227"|"Patanase 0.6 % Nasal Solution"|"62611"|"Chronic Rhinitis"|"5"|"0.294118"  
"143229"|"Voltaren 1 % GEL"|"70146"|"Osteoarthritis"|"12"|"0.545455"  
"143229"|"Voltaren 1 % GEL"|"70191"|"Localized Osteoarthritis Of The Hand"|"6"|"1"  
"143229"|"Voltaren 1 % GEL"|"70193"|"Localized Osteoarthritis Of The Knee"|"3"|"1"  
"143229"|"Voltaren 1 % GEL"|"70219"|"Osteoarthritis Of The Knee"|"4"|"0.444444"  
"143229"|"Voltaren 1 % GEL"|"70221"|"Osteoarthritis Of Multiple Sites"|"4"|"0.666667"  
"143229"|"Voltaren 1 % GEL"|"70455"|"Rheumatoid Arthritis"|"8"|"0.380952"  
"143229"|"Voltaren 1 % GEL"|"70475"|"Scleroderma"|"4"|"0.5"  
"143229"|"Voltaren 1 % GEL"|"73564"|"Lateral Epicondylitis"|"2"|"1"  
"143229"|"Voltaren 1 % GEL"|"83212"|"Diffuse Idiopathic Skeletal Hyperostosis (DISH)"|"2"|"0.666667"  
"143229"|"Voltaren 1 % GEL"|"85623"|"Joint Pain, Localized In The Knee"|"6"|"0.333333"  
"143229"|"Voltaren 1 % GEL"|"85701"|"Joint Pain, Localized In The Shoulder"|"2"|"0.333333"  
"143229"|"Voltaren 1 % GEL"|"90952"|"Joint Pain, Localized In The Left Shoulder"|"2"|"0.5"  
"143229"|"Voltaren 1 % GEL"|"278685"|"Arthralgias In Multiple Sites"|"7"|"0.777778"  
"143235"|"Allegra ODT 30 MG TBP"|"62598"|"Allergic Rhinitis"|"5"|"0.833333"  
"143235"|"Allegra ODT 30 MG TBP"|"64181"|"Asthma"|"3"|"0.375"  
"143247"|"Amoclan 600-42.9 MG/5ML SUSR"|"251528"|"Acute Otitis Media"|"2"|"1"  
"143249"|"Actonel 150 MG Oral Tablet"|"69340"|"Osteopenia"|"15"|"0.555556"  
"143249"|"Actonel 150 MG Oral Tablet"|"69341"|"Osteoporosis"|"30"|"0.625"  
"143249"|"Actonel 150 MG Oral Tablet"|"69342"|"Postmenopausal Osteoporosis"|"3"|"0.5"  
"143249"|"Actonel 150 MG Oral Tablet"|"69346"|"Drug-induced Osteoporosis"|"2"|"0.666667"

"143249"|"Actonel 150 MG Oral Tablet"|"70455"|"Rheumatoid Arthritis"|"3"|"0.272727"  
"143251"|"Treximet 85-500 MG Oral Tablet"|"60828"|"Headache"|"2"|"0.25"  
"143251"|"Treximet 85-500 MG Oral Tablet"|"74533"|"Migraine Headache"|"15"|"0.454545"  
"143251"|"Treximet 85-500 MG Oral Tablet"|"74534"|"Classic Migraine (With Aura)"|"6"|"0.75"  
"143251"|"Treximet 85-500 MG Oral Tablet"|"74537"|"Common Migraine (Without Aura)"|"7"|"0.583333"  
"143251"|"Treximet 85-500 MG Oral Tablet"|"74538"|"Common Migraine (Without Aura) With Intractable Migraine"|"4"|"1"  
"143252"|"Ferralet 90 90-1 MG Oral Tablet"|"77962"|"Anemia"|"27"|"0.818182"  
"143252"|"Ferralet 90 90-1 MG Oral Tablet"|"288609"|"Menometrorrhagia"|"2"|"0.333333"  
"143272"|"PARoxetine HCl 25 MG Oral Tablet Extended Release 24 Hour"|"61118"|"Anxiety (Symptom)"|"2"|"0.5"  
"143272"|"PARoxetine HCl 25 MG Oral Tablet Extended Release 24 Hour"|"76351"|"Depression"|"4"|"0.363636"  
"143272"|"PARoxetine HCl 25 MG Oral Tablet Extended Release 24 Hour"|"76587"|"Anxiety Disorder NOS"|"2"|"1"  
"143274"|"ROPINIRole HCl 2 MG Oral Tablet"|"75054"|"Restless Legs Syndrome"|"5"|"0.714286"  
"143274"|"ROPINIRole HCl 2 MG Oral Tablet"|"75080"|"Parkinson's Disease"|"4"|"0.8"  
"143274"|"ROPINIRole HCl 2 MG Oral Tablet"|"75125"|"Multiple Sclerosis"|"2"|"0.666667"  
"143275"|"ROPINIRole HCl 3 MG Oral Tablet"|"75080"|"Parkinson's Disease"|"2"|"0.5"  
"143277"|"ROPINIRole HCl 0.25 MG Oral Tablet"|"75054"|"Restless Legs Syndrome"|"11"|"0.916667"  
"143277"|"ROPINIRole HCl 0.25 MG Oral Tablet"|"275602"|"Organic Periodic Limb Movement Sleep Disorder"|"3"|"0.75"  
"143278"|"ROPINIRole HCl 0.5 MG Oral Tablet"|"75054"|"Restless Legs Syndrome"|"8"|"0.727273"  
"143298"|"Calcium 600-D 600-400 MG-UNIT Oral Tablet"|"69341"|"Osteoporosis"|"2"|"0.5"  
"143305"|"PhenylAde Essential Drink Mix Oral Powder"|"75807"|"Phenylketonuria"|"2"|"1"  
"143351"|"Sinus Rinse Bottle Kit Nasal Packet"|"60869"|"Cough"|"3"|"0.6"  
"143351"|"Sinus Rinse Bottle Kit Nasal Packet"|"62578"|"Acute Sinusitis"|"2"|"0.666667"  
"143351"|"Sinus Rinse Bottle Kit Nasal Packet"|"62598"|"Allergic Rhinitis"|"3"|"0.5"  
"143351"|"Sinus Rinse Bottle Kit Nasal Packet"|"62614"|"Deviated Nasal Septum (Acquired)"|"2"|"0.666667"  
"146411"|"ROPINIRole HCl 5 MG Oral Tablet"|"75054"|"Restless Legs Syndrome"|"2"|"1"  
"146411"|"ROPINIRole HCl 5 MG Oral Tablet"|"75080"|"Parkinson's Disease"|"2"|"0.666667"  
"146558"|"GNP Aspirin 325 MG Oral Tablet Delayed Release"|"62975"|"Coronary Artery Disease"|"2"|"1"  
"146622"|"Cetirizine HCl 5 MG/5ML Oral Syrup"|"60869"|"Cough"|"3"|"0.1"  
"146622"|"Cetirizine HCl 5 MG/5ML Oral Syrup"|"62597"|"Rhinitis"|"4"|"0.8"  
"146622"|"Cetirizine HCl 5 MG/5ML Oral Syrup"|"62598"|"Allergic Rhinitis"|"115"|"0.705521"  
"146622"|"Cetirizine HCl 5 MG/5ML Oral Syrup"|"62601"|"Allergic Rhinitis Due To Grass Pollen"|"2"|"0.666667"  
"146622"|"Cetirizine HCl 5 MG/5ML Oral Syrup"|"62606"|"Allergic Rhinitis Due To Dust Mite"|"2"|"0.666667"  
"146622"|"Cetirizine HCl 5 MG/5ML Oral Syrup"|"62611"|"Chronic Rhinitis"|"5"|"0.416667"  
"146622"|"Cetirizine HCl 5 MG/5ML Oral Syrup"|"64181"|"Asthma"|"19"|"0.145038"  
"146622"|"Cetirizine HCl 5 MG/5ML Oral Syrup"|"69941"|"Urticaria"|"2"|"0.5"  
"146622"|"Cetirizine HCl 5 MG/5ML Oral Syrup"|"77891"|"Acute Upper Respiratory Infection"|"6"|"0.113208"  
"146622"|"Cetirizine HCl 5 MG/5ML Oral Syrup"|"257912"|"Disorder Of Mitochondrial Metabolism"|"4"|"0.363636"  
"146622"|"Cetirizine HCl 5 MG/5ML Oral Syrup"|"278350"|"Eczema"|"6"|"0.133333"  
"146629"|"NexIUM 10 MG Oral Packet"|"60895"|"Vomiting (Symptom)"|"3"|"0.375"  
"146629"|"NexIUM 10 MG Oral Packet"|"60899"|"Abdominal Pain"|"2"|"0.4"  
"146629"|"NexIUM 10 MG Oral Packet"|"62598"|"Allergic Rhinitis"|"4"|"0.210526"  
"146629"|"NexIUM 10 MG Oral Packet"|"64688"|"Esophageal Reflux"|"34"|"0.653846"  
"146629"|"NexIUM 10 MG Oral Packet"|"292064"|"Dysphagia"|"4"|"0.4"  
"146632"|"Budeprion XL 150 MG Oral Tablet Extended Release 24 Hour"|"61118"|"Anxiety (Symptom)"|"2"|"0.666667"  
"146632"|"Budeprion XL 150 MG Oral Tablet Extended Release 24 Hour"|"76272"|"Schizoaffective Disorder"|"3"|"1"  
"146632"|"Budeprion XL 150 MG Oral Tablet Extended Release 24 Hour"|"76351"|"Depression"|"11"|"0.611111"  
"146632"|"Budeprion XL 150 MG Oral Tablet Extended Release 24 Hour"|"76357"|"Major Depression, Recurrent"|"4"|"1"  
"146632"|"Budeprion XL 150 MG Oral Tablet Extended Release 24 Hour"|"76383"|"Dysthymic Disorder"|"2"|"0.666667"  
"146632"|"Budeprion XL 150 MG Oral Tablet Extended Release 24 Hour"|"76536"|"Generalized Anxiety

Disorder"|"2"|"0.666667"  
"146632"|"Budeprion XL 150 MG Oral Tablet Extended Release 24 Hour"|"85752"|"Tobacco Use"|"3"|"0.2"  
"146632"|"Budeprion XL 150 MG Oral Tablet Extended Release 24 Hour"|"196089"|"Adjustment Disorder With  
Anxiety And Depressed Mood"|"2"|"1"  
"146633"|"Cetirizine HCl Childrens 1 MG/ML Oral Solution"|"62598"|"Allergic Rhinitis"|"2"|"0.5"  
"146634"|"Trelstar LA Mixject 11.25 MG Intramuscular Suspension Reconstituted"|"80830"|"Malignant Neoplasm Of  
The Prostate Gland"|"2"|"0.666667"  
"146658"|"Glumetza 1000 MG Oral Tablet Extended Release 24 Hour"|"69380"|"Diabetes Mellitus"|"7"|"0.21875"  
"146658"|"Glumetza 1000 MG Oral Tablet Extended Release 24 Hour"|"69381"|"Type II Diabetes Mellitus"|"6"|"0.4"  
"146658"|"Glumetza 1000 MG Oral Tablet Extended Release 24 Hour"|"69386"|"Type II Diabetes Mellitus With  
Complication - Uncontrolled"|"2"|"1"  
"146658"|"Glumetza 1000 MG Oral Tablet Extended Release 24 Hour"|"69402"|"Diabetes Mellitus Poorly  
Controlled"|"10"|"0.5"  
"146658"|"Glumetza 1000 MG Oral Tablet Extended Release 24 Hour"|"69549"|"Polycystic Ovarian  
Syndrome"|"7"|"1"  
"146658"|"Glumetza 1000 MG Oral Tablet Extended Release 24 Hour"|"283296"|"Abnormal Weight Gain"|"3"|"0.5"  
"146702"|"Calcium 600+D Plus Minerals 600-400 MG-UNIT Oral Tablet"|"257944"|"Vitamin Deficiency"|"2"|"1"  
"146710"|"Sulfamethoxazole-Trimethoprim 800-160 MG/20ML Oral Suspension"|"67695"|"Cystic  
Fibrosis"|"2"|"0.666667"  
"146710"|"Sulfamethoxazole-Trimethoprim 800-160 MG/20ML Oral Suspension"|"70027"|"Folliculitis"|"2"|"1"  
"146716"|"BuPROPion HCl 150 MG Oral Tablet Extended Release 24 Hour"|"61118"|"Anxiety  
(Symptom)"|"5"|"0.263158"  
"146716"|"BuPROPion HCl 150 MG Oral Tablet Extended Release 24 Hour"|"75125"|"Multiple Sclerosis"|"5"|"0.625"  
"146716"|"BuPROPion HCl 150 MG Oral Tablet Extended Release 24 Hour"|"75819"|"ADHD, Predominantly  
Inattentive Type"|"3"|"0.375"  
"146716"|"BuPROPion HCl 150 MG Oral Tablet Extended Release 24 Hour"|"75932"|"Anxiety Disorder Due To  
General Medical Condition With Generalized Anxiety"|"2"|"1"  
"146716"|"BuPROPion HCl 150 MG Oral Tablet Extended Release 24 Hour"|"76348"|"Bipolar II Disorder"|"2"|"0.5"  
"146716"|"BuPROPion HCl 150 MG Oral Tablet Extended Release 24 Hour"|"76351"|"Depression"|"45"|"0.584416"  
"146716"|"BuPROPion HCl 150 MG Oral Tablet Extended Release 24 Hour"|"76352"|"Major Depression, Single  
Episode"|"3"|"0.6"  
"146716"|"BuPROPion HCl 150 MG Oral Tablet Extended Release 24 Hour"|"76357"|"Major Depression,  
Recurrent"|"12"|"0.521739"  
"146716"|"BuPROPion HCl 150 MG Oral Tablet Extended Release 24 Hour"|"76359"|"Major Depression, Recurrent  
With Melancholia"|"5"|"0.833333"  
"146716"|"BuPROPion HCl 150 MG Oral Tablet Extended Release 24 Hour"|"76361"|"Moderate Recurrent Major  
Depression"|"11"|"0.6875"  
"146716"|"BuPROPion HCl 150 MG Oral Tablet Extended Release 24 Hour"|"76363"|"Major Depression, Recurrent  
With Psychotic Features"|"2"|"1"  
"146716"|"BuPROPion HCl 150 MG Oral Tablet Extended Release 24 Hour"|"76364"|"Recurrent Major Depression In  
Partial Remission"|"2"|"0.666667"  
"146716"|"BuPROPion HCl 150 MG Oral Tablet Extended Release 24 Hour"|"76383"|"Dysthymic  
Disorder"|"4"|"0.666667"  
"146716"|"BuPROPion HCl 150 MG Oral Tablet Extended Release 24 Hour"|"76388"|"Bipolar Disorder  
NOS"|"3"|"0.6"  
"146716"|"BuPROPion HCl 150 MG Oral Tablet Extended Release 24 Hour"|"76389"|"Atypical Depressive  
Disorder"|"2"|"0.5"  
"146716"|"BuPROPion HCl 150 MG Oral Tablet Extended Release 24 Hour"|"76536"|"Generalized Anxiety  
Disorder"|"6"|"0.26087"  
"146716"|"BuPROPion HCl 150 MG Oral Tablet Extended Release 24 Hour"|"76546"|"Obsessive Compulsive  
Disorder"|"2"|"0.4"  
"146716"|"BuPROPion HCl 150 MG Oral Tablet Extended Release 24 Hour"|"76680"|"Adjustment Disorder With  
Anxiety"|"4"|"0.571429"  
"146716"|"BuPROPion HCl 150 MG Oral Tablet Extended Release 24 Hour"|"275520"|"Bipolar I Disorder, Most

Recent Episode, Depressed - Severe Without Psychotic Features|"2|"1"  
"146716|"BuPROPion HCl 150 MG Oral Tablet Extended Release 24 Hour|"275526|"Severe Recurrent Major Depression Without Psychotic Features|"2|"0.666667"  
"146716|"BuPROPion HCl 150 MG Oral Tablet Extended Release 24 Hour|"275538|"Moderate Single Episode Major Depression|"2|"1"  
"146716|"BuPROPion HCl 150 MG Oral Tablet Extended Release 24 Hour|"275604|"Depression With Anxiety|"4|"0.8"  
"146716|"BuPROPion HCl 150 MG Oral Tablet Extended Release 24 Hour|"291647|"Intervention And Counseling On Cessation Of Tobacco Use|"3|"0.75"  
"146824|"Requip XL 8 MG Oral Tablet Extended Release 24 Hour|"75080|"Parkinson's Disease|"9|"0.5625"  
"146849|"Requip XL 2 MG Oral Tablet Extended Release 24 Hour|"75054|"Restless Legs Syndrome|"6|"0.75"  
"146849|"Requip XL 2 MG Oral Tablet Extended Release 24 Hour|"75080|"Parkinson's Disease|"4|"0.307692"  
"146860|"Ocella 3-0.03 MG Oral Tablet|"69549|"Polycystic Ovarian Syndrome|"7|"0.4375"  
"146860|"Ocella 3-0.03 MG Oral Tablet|"85949|"Birth Control Method - Oral Contraceptives|"2|"0.4"  
"146860|"Ocella 3-0.03 MG Oral Tablet|"187792|"Gynecologic Services Contraceptive Management|"7|"0.636364"  
"146860|"Ocella 3-0.03 MG Oral Tablet|"250989|"Oral Contraceptives|"5|"0.714286"  
"146893|"Requip XL 4 MG Oral Tablet Extended Release 24 Hour|"75054|"Restless Legs Syndrome|"2|"0.5"  
"146893|"Requip XL 4 MG Oral Tablet Extended Release 24 Hour|"75080|"Parkinson's Disease|"3|"0.5"  
"146969|"RisperiDONE 1 MG/ML Oral Solution|"75907|"Mental Retardation With Other Behavioral Symptoms|"2|"0.666667"  
"146969|"RisperiDONE 1 MG/ML Oral Solution|"252543|"Encephalopathy|"2|"0.222222"  
"146969|"RisperiDONE 1 MG/ML Oral Solution|"275496|"Autistic Disorder|"12|"0.75"  
"146973|"RisperiDONE 4 MG Oral Tablet|"76232|"Paranoid Schizophrenia|"2|"0.666667"  
"146973|"RisperiDONE 4 MG Oral Tablet|"76272|"Schizoaffective Disorder|"3|"0.75"  
"146975|"RisperiDONE 0.25 MG Oral Tablet|"75818|"Attention-deficit Hyperactivity Disorder|"3|"0.375"  
"146975|"RisperiDONE 0.25 MG Oral Tablet|"75834|"Disruptive Behavior Disorder|"4|"1"  
"146975|"RisperiDONE 0.25 MG Oral Tablet|"75854|"Oppositional Defiant Disorder Of Childhood|"3|"0.75"  
"146975|"RisperiDONE 0.25 MG Oral Tablet|"75897|"Pervasive Developmental Disorders|"2|"0.666667"  
"146975|"RisperiDONE 0.25 MG Oral Tablet|"75904|"Atypical Pervasive Developmental Disorder|"2|"1"  
"146975|"RisperiDONE 0.25 MG Oral Tablet|"76212|"Psychosis|"3|"0.75"  
"146975|"RisperiDONE 0.25 MG Oral Tablet|"76306|"Episodic Mood Disorders|"11|"0.785714"  
"146975|"RisperiDONE 0.25 MG Oral Tablet|"251600|"Dementia|"4|"0.666667"  
"146975|"RisperiDONE 0.25 MG Oral Tablet|"257912|"Disorder Of Mitochondrial Metabolism|"2|"0.666667"  
"146975|"RisperiDONE 0.25 MG Oral Tablet|"275486|"ADHD, Combined Type|"3|"0.214286"  
"146975|"RisperiDONE 0.25 MG Oral Tablet|"275496|"Autistic Disorder|"5|"0.714286"  
"146975|"RisperiDONE 0.25 MG Oral Tablet|"275553|"Bipolar I Disorder, Most Recent Episode|"3|"1"  
"146975|"RisperiDONE 0.25 MG Oral Tablet|"275615|"Behavioral Insomnia Of Childhood|"2|"1"  
"146975|"RisperiDONE 0.25 MG Oral Tablet|"289876|"Alzheimer's Disease With Behavioral Disturbance|"3|"0.75"  
"146989|"RisperiDONE 3 MG Oral Tablet|"76213|"Schizophrenia|"2|"1"  
"146989|"RisperiDONE 3 MG Oral Tablet|"76232|"Paranoid Schizophrenia|"5|"0.833333"  
"146989|"RisperiDONE 3 MG Oral Tablet|"76238|"Paranoid Schizophrenia, Stable|"3|"0.6"  
"146989|"RisperiDONE 3 MG Oral Tablet|"76245|"Undifferentiated Schizophrenia|"3|"1"  
"146989|"RisperiDONE 3 MG Oral Tablet|"76272|"Schizoaffective Disorder|"6|"0.857143"  
"146989|"RisperiDONE 3 MG Oral Tablet|"76281|"Chronic Schizophrenia|"2|"1"  
"146989|"RisperiDONE 3 MG Oral Tablet|"76307|"Bipolar Disorder|"2|"0.5"  
"146992|"RisperiDONE 1 MG Oral Tablet|"30261|"Bipolar I Disorder, Most Recent Episode, Depressed - Severe With Psychotic Features|"3|"0.75"  
"146992|"RisperiDONE 1 MG Oral Tablet|"61108|"Insomnia|"2|"0.285714"  
"146992|"RisperiDONE 1 MG Oral Tablet|"75834|"Disruptive Behavior Disorder|"2|"0.666667"  
"146992|"RisperiDONE 1 MG Oral Tablet|"75854|"Oppositional Defiant Disorder Of Childhood|"3|"0.428571"  
"146992|"RisperiDONE 1 MG Oral Tablet|"76212|"Psychosis|"5|"0.714286"  
"146992|"RisperiDONE 1 MG Oral Tablet|"76213|"Schizophrenia|"2|"0.4"

"146992"|"RisperiDONE 1 MG Oral Tablet"|"76232"|"Paranoid Schizophrenia"|"4"|"1"  
"146992"|"RisperiDONE 1 MG Oral Tablet"|"76245"|"Undifferentiated Schizophrenia"|"2"|"0.666667"  
"146992"|"RisperiDONE 1 MG Oral Tablet"|"76272"|"Schizoaffective Disorder"|"6"|"0.857143"  
"146992"|"RisperiDONE 1 MG Oral Tablet"|"76290"|"Atypical Psychosis"|"2"|"1"  
"146992"|"RisperiDONE 1 MG Oral Tablet"|"76306"|"Episodic Mood Disorders"|"9"|"0.642857"  
"146992"|"RisperiDONE 1 MG Oral Tablet"|"76307"|"Bipolar Disorder"|"3"|"0.375"  
"146992"|"RisperiDONE 1 MG Oral Tablet"|"76342"|"Bipolar I Disorder, Most Recent Episode, Depressed - Mild"|"2"|"1"  
"146992"|"RisperiDONE 1 MG Oral Tablet"|"76348"|"Bipolar II Disorder"|"3"|"0.6"  
"146992"|"RisperiDONE 1 MG Oral Tablet"|"76351"|"Depression"|"5"|"0.277778"  
"146992"|"RisperiDONE 1 MG Oral Tablet"|"76357"|"Major Depression, Recurrent"|"4"|"0.571429"  
"146992"|"RisperiDONE 1 MG Oral Tablet"|"76361"|"Moderate Recurrent Major Depression"|"2"|"0.285714"  
"146992"|"RisperiDONE 1 MG Oral Tablet"|"76363"|"Major Depression, Recurrent With Psychotic Features"|"5"|"0.5"  
"146992"|"RisperiDONE 1 MG Oral Tablet"|"76388"|"Bipolar Disorder NOS"|"11"|"0.611111"  
"146992"|"RisperiDONE 1 MG Oral Tablet"|"76536"|"Generalized Anxiety Disorder"|"3"|"0.333333"  
"146992"|"RisperiDONE 1 MG Oral Tablet"|"76669"|"Impulse Control Disorder"|"3"|"0.75"  
"146992"|"RisperiDONE 1 MG Oral Tablet"|"275486"|"ADHD, Combined Type"|"5"|"0.454545"  
"146992"|"RisperiDONE 1 MG Oral Tablet"|"275492"|"ADHD, Predominantly Hyperactive - Impulsive"|"2"|"0.666667"  
"146992"|"RisperiDONE 1 MG Oral Tablet"|"275496"|"Autistic Disorder"|"5"|"0.833333"  
"147014"|"RisperiDONE 0.5 MG Oral Tablet"|"75834"|"Disruptive Behavior Disorder"|"4"|"1"  
"147014"|"RisperiDONE 0.5 MG Oral Tablet"|"75854"|"Oppositional Defiant Disorder Of Childhood"|"7"|"0.636364"  
"147014"|"RisperiDONE 0.5 MG Oral Tablet"|"75897"|"Pervasive Developmental Disorders"|"2"|"0.333333"  
"147014"|"RisperiDONE 0.5 MG Oral Tablet"|"75900"|"Childhood Onset Pervasive Developmental Autistic Disorder"|"2"|"1"  
"147014"|"RisperiDONE 0.5 MG Oral Tablet"|"76272"|"Schizoaffective Disorder"|"2"|"0.666667"  
"147014"|"RisperiDONE 0.5 MG Oral Tablet"|"76306"|"Episodic Mood Disorders"|"14"|"0.7"  
"147014"|"RisperiDONE 0.5 MG Oral Tablet"|"76307"|"Bipolar Disorder"|"2"|"0.5"  
"147014"|"RisperiDONE 0.5 MG Oral Tablet"|"76348"|"Bipolar II Disorder"|"2"|"0.666667"  
"147014"|"RisperiDONE 0.5 MG Oral Tablet"|"76351"|"Depression"|"6"|"0.315789"  
"147014"|"RisperiDONE 0.5 MG Oral Tablet"|"76357"|"Major Depression, Recurrent"|"3"|"0.375"  
"147014"|"RisperiDONE 0.5 MG Oral Tablet"|"76363"|"Major Depression, Recurrent With Psychotic Features"|"2"|"1"  
"147014"|"RisperiDONE 0.5 MG Oral Tablet"|"76388"|"Bipolar Disorder NOS"|"5"|"0.625"  
"147014"|"RisperiDONE 0.5 MG Oral Tablet"|"76686"|"Adjustment Disorder With Disturbance Of Emotions And Conduct"|"3"|"0.6"  
"147014"|"RisperiDONE 0.5 MG Oral Tablet"|"251600"|"Dementia"|"3"|"0.230769"  
"147014"|"RisperiDONE 0.5 MG Oral Tablet"|"252573"|"Frontotemporal Dementia"|"2"|"1"  
"147014"|"RisperiDONE 0.5 MG Oral Tablet"|"275486"|"ADHD, Combined Type"|"10"|"0.384615"  
"147014"|"RisperiDONE 0.5 MG Oral Tablet"|"275496"|"Autistic Disorder"|"5"|"0.555556"  
"147014"|"RisperiDONE 0.5 MG Oral Tablet"|"275592"|"Post-traumatic Stress Disorder"|"2"|"0.285714"  
"147016"|"Cetirizine HCl 1 MG/ML Oral Syrup"|"62598"|"Allergic Rhinitis"|"58"|"0.610526"  
"147016"|"Cetirizine HCl 1 MG/ML Oral Syrup"|"64565"|"Upper Respiratory Tract Disorders"|"2"|"0.333333"  
"147016"|"Cetirizine HCl 1 MG/ML Oral Syrup"|"93702"|"Allergies"|"3"|"0.111111"  
"147016"|"Cetirizine HCl 1 MG/ML Oral Syrup"|"278350"|"Eczema"|"3"|"0.103448"  
"147058"|"RisperiDONE 2 MG Oral Tablet"|"76232"|"Paranoid Schizophrenia"|"5"|"0.833333"  
"147058"|"RisperiDONE 2 MG Oral Tablet"|"76234"|"Paranoid Schizophrenia, Chronic"|"2"|"1"  
"147058"|"RisperiDONE 2 MG Oral Tablet"|"76245"|"Undifferentiated Schizophrenia"|"2"|"0.666667"  
"147058"|"RisperiDONE 2 MG Oral Tablet"|"76272"|"Schizoaffective Disorder"|"6"|"0.75"  
"147058"|"RisperiDONE 2 MG Oral Tablet"|"76281"|"Chronic Schizophrenia"|"2"|"1"  
"147058"|"RisperiDONE 2 MG Oral Tablet"|"76306"|"Episodic Mood Disorders"|"2"|"0.5"  
"147058"|"RisperiDONE 2 MG Oral Tablet"|"76307"|"Bipolar Disorder"|"2"|"0.666667"  
"147058"|"RisperiDONE 2 MG Oral Tablet"|"76357"|"Major Depression, Recurrent"|"3"|"0.6"  
"147058"|"RisperiDONE 2 MG Oral Tablet"|"76363"|"Major Depression, Recurrent With Psychotic Features"|"3"|"1"  
"147058"|"RisperiDONE 2 MG Oral Tablet"|"76388"|"Bipolar Disorder NOS"|"2"|"0.333333"

"147058"|"RisperiDONE 2 MG Oral Tablet"|"76536"|"Generalized Anxiety Disorder"|"2"|"0.285714"  
"147058"|"RisperiDONE 2 MG Oral Tablet"|"275540"|"Severe Recurrent Major Depression With Psychotic  
Features"|"2"|"1"  
"147139"|"BD Insulin Syringe Ultrafine 31G X 5/16\|0.3 ML Miscellaneous"|"69381"|"Type II Diabetes  
Mellitus"|"2"|"1"  
"147139"|"BD Insulin Syringe Ultrafine 31G X 5/16\|0.3 ML Miscellaneous"|"69387"|"Type I Diabetes  
Mellitus"|"2"|"0.4"  
"147139"|"BD Insulin Syringe Ultrafine 31G X 5/16\|0.3 ML Miscellaneous"|"69388"|"Type I Diabetes Mellitus -  
Uncontrolled"|"7"|"0.875"  
"147139"|"BD Insulin Syringe Ultrafine 31G X 5/16\|0.3 ML Miscellaneous"|"69402"|"Diabetes Mellitus Poorly  
Controlled"|"10"|"0.833333"  
"147161"|"BD Insulin Syringe Ultrafine 31G X 5/16\|1 ML Miscellaneous"|"69380"|"Diabetes  
Mellitus"|"5"|"0.555556"  
"147176"|"QC Ferrous Sulfate 325 (65 Fe) MG Oral Tablet"|"77970"|"Iron Deficiency Anemia Secondary To  
Inadequate Dietary Iron Intake"|"2"|"1"  
"147356"|"LamoTRiGine 200 MG Oral Tablet"|"74988"|"Seizure Disorder"|"4"|"0.129032"  
"147356"|"LamoTRiGine 200 MG Oral Tablet"|"74992"|"Generalized Convulsive Myoclonic Seizure With Intractable  
Seizure"|"2"|"1"  
"147356"|"LamoTRiGine 200 MG Oral Tablet"|"74994"|"Nonconvulsive (Petit Mal) Seizure With Intractable  
Seizure"|"2"|"0.666667"  
"147356"|"LamoTRiGine 200 MG Oral Tablet"|"75001"|"Partial Complex Psychomotor Seizure"|"3"|"0.6"  
"147356"|"LamoTRiGine 200 MG Oral Tablet"|"75002"|"Partial Complex Psychomotor Seizure With Intractable  
Seizure"|"15"|"0.714286"  
"147356"|"LamoTRiGine 200 MG Oral Tablet"|"76306"|"Episodic Mood Disorders"|"2"|"0.666667"  
"147356"|"LamoTRiGine 200 MG Oral Tablet"|"76307"|"Bipolar Disorder"|"3"|"0.3"  
"147356"|"LamoTRiGine 200 MG Oral Tablet"|"76329"|"Bipolar I Disorder, Most Recent Episode, Mixed In Partial  
Remission"|"2"|"1"  
"147356"|"LamoTRiGine 200 MG Oral Tablet"|"76348"|"Bipolar II Disorder"|"6"|"0.666667"  
"147356"|"LamoTRiGine 200 MG Oral Tablet"|"76357"|"Major Depression, Recurrent"|"2"|"1"  
"147356"|"LamoTRiGine 200 MG Oral Tablet"|"76388"|"Bipolar Disorder NOS"|"5"|"0.625"  
"147356"|"LamoTRiGine 200 MG Oral Tablet"|"252546"|"Generalized Convulsive Seizure"|"3"|"0.75"  
"147356"|"LamoTRiGine 200 MG Oral Tablet"|"252552"|"Generalized Convulsive Tonic-clonic Seizure With  
Intractable Seizure"|"3"|"1"  
"147356"|"LamoTRiGine 200 MG Oral Tablet"|"252566"|"Partial Complex Seizure"|"6"|"0.666667"  
"147356"|"LamoTRiGine 200 MG Oral Tablet"|"252569"|"Partial Complex Seizure With Secondary  
Generalization"|"3"|"0.5"  
"147356"|"LamoTRiGine 200 MG Oral Tablet"|"275520"|"Bipolar I Disorder, Most Recent Episode, Depressed -  
Severe Without Psychotic Features"|"2"|"1"  
"147356"|"LamoTRiGine 200 MG Oral Tablet"|"289878"|"Generalized Convulsive Myoclonic Seizure,  
Juvenile"|"3"|"0.75"  
"147356"|"LamoTRiGine 200 MG Oral Tablet"|"289879"|"Generalized Convulsive Myoclonic Seizure, Juvenile With  
Intractable Seizure"|"2"|"0.666667"  
"147377"|"LamoTRiGine 100 MG Oral Tablet"|"74988"|"Seizure Disorder"|"16"|"0.275862"  
"147377"|"LamoTRiGine 100 MG Oral Tablet"|"74989"|"Generalized Convulsive Grand Mal Seizure"|"3"|"0.75"  
"147377"|"LamoTRiGine 100 MG Oral Tablet"|"74990"|"Convulsive Grand Mal Seizure With Intractable  
Seizure"|"2"|"0.4"  
"147377"|"LamoTRiGine 100 MG Oral Tablet"|"75000"|"Partial Simple Seizure With Intractable Seizure"|"3"|"1"  
"147377"|"LamoTRiGine 100 MG Oral Tablet"|"75001"|"Partial Complex Psychomotor Seizure"|"4"|"0.4"  
"147377"|"LamoTRiGine 100 MG Oral Tablet"|"75002"|"Partial Complex Psychomotor Seizure With Intractable  
Seizure"|"22"|"0.733333"  
"147377"|"LamoTRiGine 100 MG Oral Tablet"|"75354"|"Cerebral Artery Thrombosis - With Cerebral  
Infarction"|"2"|"0.4"  
"147377"|"LamoTRiGine 100 MG Oral Tablet"|"75929"|"Mood Disorder Due To General Medical Condition"|"2"|"1"  
"147377"|"LamoTRiGine 100 MG Oral Tablet"|"76306"|"Episodic Mood Disorders"|"5"|"1"

"147377"|"LamoTRIGine 100 MG Oral Tablet"|"76307"|"Bipolar Disorder"|"6"|"0.428571"  
"147377"|"LamoTRIGine 100 MG Oral Tablet"|"76348"|"Bipolar II Disorder"|"4"|"0.571429"  
"147377"|"LamoTRIGine 100 MG Oral Tablet"|"76357"|"Major Depression, Recurrent"|"3"|"0.428571"  
"147377"|"LamoTRIGine 100 MG Oral Tablet"|"76388"|"Bipolar Disorder NOS"|"6"|"0.545455"  
"147377"|"LamoTRIGine 100 MG Oral Tablet"|"252543"|"Encephalopathy"|"2"|"0.285714"  
"147377"|"LamoTRIGine 100 MG Oral Tablet"|"252546"|"Generalized Convulsive Seizure"|"5"|"0.416667"  
"147377"|"LamoTRIGine 100 MG Oral Tablet"|"252547"|"Generalized Convulsive Clonic Seizure"|"2"|"1"  
"147377"|"LamoTRIGine 100 MG Oral Tablet"|"252550"|"Generalized Convulsive Tonic Seizure With Intractable Seizure"|"2"|"1"  
"147377"|"LamoTRIGine 100 MG Oral Tablet"|"252551"|"Generalized Convulsive Tonic-clonic Seizure"|"5"|"0.625"  
"147377"|"LamoTRIGine 100 MG Oral Tablet"|"252552"|"Generalized Convulsive Tonic-clonic Seizure With Intractable Seizure"|"5"|"0.625"  
"147377"|"LamoTRIGine 100 MG Oral Tablet"|"252553"|"Generalized Nonconvulsive Seizure"|"4"|"0.666667"  
"147377"|"LamoTRIGine 100 MG Oral Tablet"|"252566"|"Partial Complex Seizure"|"11"|"0.6875"  
"147377"|"LamoTRIGine 100 MG Oral Tablet"|"252568"|"Partial Complex Psychosensory Seizure With Intractable Seizure"|"3"|"0.75"  
"147377"|"LamoTRIGine 100 MG Oral Tablet"|"252569"|"Partial Complex Seizure With Secondary Generalization"|"4"|"0.5"  
"147377"|"LamoTRIGine 100 MG Oral Tablet"|"252570"|"Partial Complex Seizure With Secondary Generalization With Intractable Seizure"|"3"|"0.3"  
"147377"|"LamoTRIGine 100 MG Oral Tablet"|"288824"|"Convulsive Disorder"|"3"|"0.333333"  
"147377"|"LamoTRIGine 100 MG Oral Tablet"|"297231"|"Epilepsy"|"4"|"0.5"  
"147411"|"LamoTRIGine 25 MG Oral Tablet"|"74988"|"Seizure Disorder"|"15"|"0.416667"  
"147411"|"LamoTRIGine 25 MG Oral Tablet"|"74989"|"Generalized Convulsive Grand Mal Seizure"|"3"|"1"  
"147411"|"LamoTRIGine 25 MG Oral Tablet"|"75001"|"Partial Complex Psychomotor Seizure"|"2"|"0.666667"  
"147411"|"LamoTRIGine 25 MG Oral Tablet"|"75002"|"Partial Complex Psychomotor Seizure With Intractable Seizure"|"10"|"0.588235"  
"147411"|"LamoTRIGine 25 MG Oral Tablet"|"75929"|"Mood Disorder Due To General Medical Condition"|"2"|"0.666667"  
"147411"|"LamoTRIGine 25 MG Oral Tablet"|"76306"|"Episodic Mood Disorders"|"3"|"0.75"  
"147411"|"LamoTRIGine 25 MG Oral Tablet"|"76307"|"Bipolar Disorder"|"4"|"0.5"  
"147411"|"LamoTRIGine 25 MG Oral Tablet"|"76325"|"Bipolar I Disorder, Most Recent Episode, Mixed - Moderate"|"3"|"1"  
"147411"|"LamoTRIGine 25 MG Oral Tablet"|"76339"|"Bipolar I Disorder, Most Recent Episode, Depressed"|"2"|"0.666667"  
"147411"|"LamoTRIGine 25 MG Oral Tablet"|"76348"|"Bipolar II Disorder"|"4"|"0.5"  
"147411"|"LamoTRIGine 25 MG Oral Tablet"|"76388"|"Bipolar Disorder NOS"|"11"|"0.52381"  
"147411"|"LamoTRIGine 25 MG Oral Tablet"|"252550"|"Generalized Convulsive Tonic Seizure With Intractable Seizure"|"2"|"1"  
"147411"|"LamoTRIGine 25 MG Oral Tablet"|"252551"|"Generalized Convulsive Tonic-clonic Seizure"|"2"|"0.666667"  
"147411"|"LamoTRIGine 25 MG Oral Tablet"|"252552"|"Generalized Convulsive Tonic-clonic Seizure With Intractable Seizure"|"3"|"0.5"  
"147411"|"LamoTRIGine 25 MG Oral Tablet"|"252566"|"Partial Complex Seizure"|"2"|"0.285714"  
"147411"|"LamoTRIGine 25 MG Oral Tablet"|"252569"|"Partial Complex Seizure With Secondary Generalization"|"2"|"0.4"  
"147411"|"LamoTRIGine 25 MG Oral Tablet"|"297231"|"Epilepsy"|"6"|"0.5"  
"147420"|"LamoTRIGine 150 MG Oral Tablet"|"61040"|"Convulsions"|"2"|"0.666667"  
"147420"|"LamoTRIGine 150 MG Oral Tablet"|"74988"|"Seizure Disorder"|"8"|"0.363636"  
"147420"|"LamoTRIGine 150 MG Oral Tablet"|"74989"|"Generalized Convulsive Grand Mal Seizure"|"2"|"1"  
"147420"|"LamoTRIGine 150 MG Oral Tablet"|"75002"|"Partial Complex Psychomotor Seizure With Intractable Seizure"|"7"|"0.7"  
"147420"|"LamoTRIGine 150 MG Oral Tablet"|"76306"|"Episodic Mood Disorders"|"3"|"0.5"  
"147420"|"LamoTRIGine 150 MG Oral Tablet"|"76307"|"Bipolar Disorder"|"3"|"0.428571"  
"147420"|"LamoTRIGine 150 MG Oral Tablet"|"76348"|"Bipolar II Disorder"|"6"|"0.857143"

"147420"|"LamoTRIgine 150 MG Oral Tablet"|"76388"|"Bipolar Disorder NOS"|"4"|"0.571429"  
"147420"|"LamoTRIgine 150 MG Oral Tablet"|"252552"|"Generalized Convulsive Tonic-clonic Seizure With  
Intractable Seizure"|"2"|"0.5"  
"147420"|"LamoTRIgine 150 MG Oral Tablet"|"252566"|"Partial Complex Seizure"|"3"|"0.6"  
"147420"|"LamoTRIgine 150 MG Oral Tablet"|"252570"|"Partial Complex Seizure With Secondary Generalization  
With Intractable Seizure"|"2"|"0.4"  
"147420"|"LamoTRIgine 150 MG Oral Tablet"|"275520"|"Bipolar I Disorder, Most Recent Episode, Depressed -  
Severe Without Psychotic Features"|"2"|"1"  
"147420"|"LamoTRIgine 150 MG Oral Tablet"|"275553"|"Bipolar I Disorder, Most Recent Episode"|"2"|"1"  
"147420"|"LamoTRIgine 150 MG Oral Tablet"|"297231"|"Epilepsy"|"2"|"0.5"  
"147530"|"Eplerenone 50 MG Oral Tablet"|"63217"|"Congestive Heart Failure"|"2"|"0.666667"  
"147530"|"Eplerenone 50 MG Oral Tablet"|"63467"|"Hypertension"|"4"|"0.666667"  
"147544"|"Eplerenone 25 MG Oral Tablet"|"62975"|"Coronary Artery Disease"|"2"|"0.25"  
"147544"|"Eplerenone 25 MG Oral Tablet"|"63217"|"Congestive Heart Failure"|"3"|"0.375"  
"147552"|"Omeprazole 40 MG Oral Capsule Delayed Release"|"60891"|"Heartburn"|"6"|"0.545455"  
"147552"|"Omeprazole 40 MG Oral Capsule Delayed Release"|"60899"|"Abdominal Pain"|"12"|"0.292683"  
"147552"|"Omeprazole 40 MG Oral Capsule Delayed Release"|"64579"|"Gastroenteritis"|"3"|"0.3"  
"147552"|"Omeprazole 40 MG Oral Capsule Delayed Release"|"64678"|"Esophagitis"|"4"|"1"  
"147552"|"Omeprazole 40 MG Oral Capsule Delayed Release"|"64680"|"Chronic Reflux Esophagitis"|"34"|"0.653846"  
"147552"|"Omeprazole 40 MG Oral Capsule Delayed Release"|"64688"|"Esophageal Reflux"|"145"|"0.680751"  
"147552"|"Omeprazole 40 MG Oral Capsule Delayed Release"|"64762"|"Dyspepsia"|"4"|"0.5"  
"147552"|"Omeprazole 40 MG Oral Capsule Delayed Release"|"64763"|"Gastritis"|"22"|"0.488889"  
"147552"|"Omeprazole 40 MG Oral Capsule Delayed Release"|"64825"|"Peptic Ulcer"|"5"|"0.263158"  
"147552"|"Omeprazole 40 MG Oral Capsule Delayed Release"|"64826"|"Gastric Ulcer"|"2"|"0.222222"  
"147552"|"Omeprazole 40 MG Oral Capsule Delayed Release"|"65286"|"Cirrhosis"|"2"|"0.25"  
"147552"|"Omeprazole 40 MG Oral Capsule Delayed Release"|"70455"|"Rheumatoid Arthritis"|"6"|"0.272727"  
"147552"|"Omeprazole 40 MG Oral Capsule Delayed Release"|"70475"|"Scleroderma"|"6"|"0.285714"  
"147552"|"Omeprazole 40 MG Oral Capsule Delayed Release"|"70476"|"CREST Syndrome"|"2"|"0.5"  
"147552"|"Omeprazole 40 MG Oral Capsule Delayed Release"|"70477"|"Scleroderma With Pulmonary  
Involvement"|"2"|"0.666667"  
"147552"|"Omeprazole 40 MG Oral Capsule Delayed Release"|"70706"|"Ankylosing Spondylitis"|"3"|"0.75"  
"147552"|"Omeprazole 40 MG Oral Capsule Delayed Release"|"78625"|"Vocal Cord Granuloma"|"2"|"1"  
"147552"|"Omeprazole 40 MG Oral Capsule Delayed Release"|"87543"|"Chronic Cough"|"2"|"0.5"  
"147552"|"Omeprazole 40 MG Oral Capsule Delayed Release"|"87736"|"Abdominal Pain In The Central Upper Belly  
(Epigastric)"|"7"|"0.538462"  
"147552"|"Omeprazole 40 MG Oral Capsule Delayed Release"|"116196"|"Abdomen Tenderness Direct  
Epigastric"|"6"|"0.428571"  
"147552"|"Omeprazole 40 MG Oral Capsule Delayed Release"|"163451"|"Speech Phonation  
Dysphonia"|"4"|"0.571429"  
"147552"|"Omeprazole 40 MG Oral Capsule Delayed Release"|"276379"|"Heartburn With Regurgitation"|"2"|"0.5"  
"147552"|"Omeprazole 40 MG Oral Capsule Delayed Release"|"282704"|"Acute Gastritis"|"4"|"0.4"  
"147552"|"Omeprazole 40 MG Oral Capsule Delayed Release"|"282806"|"Post-gastric Bypass For Obesity"|"2"|"0.4"  
"147552"|"Omeprazole 40 MG Oral Capsule Delayed Release"|"289114"|"Laryngopharyngeal Reflux"|"7"|"0.777778"  
"147553"|"Divalproex Sodium 125 MG Oral Tablet Delayed Release"|"61048"|"Memory Lapses Or  
Loss"|"2"|"0.666667"  
"147553"|"Divalproex Sodium 125 MG Oral Tablet Delayed Release"|"74988"|"Seizure Disorder"|"4"|"0.363636"  
"147553"|"Divalproex Sodium 125 MG Oral Tablet Delayed Release"|"76306"|"Episodic Mood Disorders"|"2"|"1"  
"147553"|"Divalproex Sodium 125 MG Oral Tablet Delayed Release"|"251600"|"Dementia"|"8"|"0.727273"  
"147553"|"Divalproex Sodium 125 MG Oral Tablet Delayed Release"|"289876"|"Alzheimer's Disease With Behavioral  
Disturbance"|"5"|"0.714286"  
"147553"|"Divalproex Sodium 125 MG Oral Tablet Delayed Release"|"297231"|"Epilepsy"|"2"|"1"  
"147563"|"Divalproex Sodium 250 MG Oral Tablet Delayed Release"|"74533"|"Migraine Headache"|"7"|"0.318182"  
"147563"|"Divalproex Sodium 250 MG Oral Tablet Delayed Release"|"74551"|"Non-migrainous Vascular  
Headache"|"5"|"0.555556"

"147563"|"Divalproex Sodium 250 MG Oral Tablet Delayed Release"|"74988"|"Seizure Disorder"|"4"|"0.235294"  
"147563"|"Divalproex Sodium 250 MG Oral Tablet Delayed Release"|"75020"|"Alzheimer's Disease"|"2"|"0.333333"  
"147563"|"Divalproex Sodium 250 MG Oral Tablet Delayed Release"|"75125"|"Multiple Sclerosis"|"2"|"0.285714"  
"147563"|"Divalproex Sodium 250 MG Oral Tablet Delayed Release"|"76272"|"Schizoaffective Disorder"|"2"|"1"  
"147563"|"Divalproex Sodium 250 MG Oral Tablet Delayed Release"|"76306"|"Episodic Mood Disorders"|"2"|"0.5"  
"147563"|"Divalproex Sodium 250 MG Oral Tablet Delayed Release"|"76307"|"Bipolar Disorder"|"4"|"0.5"  
"147563"|"Divalproex Sodium 250 MG Oral Tablet Delayed Release"|"76388"|"Bipolar Disorder NOS"|"2"|"1"  
"147563"|"Divalproex Sodium 250 MG Oral Tablet Delayed Release"|"251600"|"Dementia"|"3"|"0.333333"  
"147563"|"Divalproex Sodium 250 MG Oral Tablet Delayed Release"|"252549"|"Generalized Convulsive Tonic Seizure"|"2"|"1"  
"147563"|"Divalproex Sodium 250 MG Oral Tablet Delayed Release"|"252566"|"Partial Complex Seizure"|"4"|"0.8"  
"147563"|"Divalproex Sodium 250 MG Oral Tablet Delayed Release"|"289876"|"Alzheimer's Disease With Behavioral Disturbance"|"5"|"0.833333"  
"147566"|"Divalproex Sodium 500 MG Oral Tablet Delayed Release"|"74988"|"Seizure Disorder"|"9"|"0.391304"  
"147566"|"Divalproex Sodium 500 MG Oral Tablet Delayed Release"|"76212"|"Psychosis"|"2"|"1"  
"147566"|"Divalproex Sodium 500 MG Oral Tablet Delayed Release"|"76213"|"Schizophrenia"|"3"|"0.75"  
"147566"|"Divalproex Sodium 500 MG Oral Tablet Delayed Release"|"76232"|"Paranoid Schizophrenia"|"2"|"1"  
"147566"|"Divalproex Sodium 500 MG Oral Tablet Delayed Release"|"76272"|"Schizoaffective Disorder"|"3"|"1"  
"147566"|"Divalproex Sodium 500 MG Oral Tablet Delayed Release"|"76325"|"Bipolar I Disorder, Most Recent Episode, Mixed - Moderate"|"2"|"0.666667"  
"147566"|"Divalproex Sodium 500 MG Oral Tablet Delayed Release"|"76348"|"Bipolar II Disorder"|"3"|"0.75"  
"147566"|"Divalproex Sodium 500 MG Oral Tablet Delayed Release"|"76388"|"Bipolar Disorder NOS"|"3"|"0.3"  
"148181"|"Galantamine Hydrobromide 4 MG Oral Tablet"|"75020"|"Alzheimer's Disease"|"4"|"0.8"  
"148226"|"Galantamine Hydrobromide 8 MG Oral Tablet"|"251600"|"Dementia"|"2"|"1"  
"148659"|"Keppra XR 500 MG Oral Tablet Extended Release 24 Hour"|"74988"|"Seizure Disorder"|"10"|"0.27027"  
"148659"|"Keppra XR 500 MG Oral Tablet Extended Release 24 Hour"|"74989"|"Generalized Convulsive Grand Mal Seizure"|"2"|"1"  
"148659"|"Keppra XR 500 MG Oral Tablet Extended Release 24 Hour"|"74990"|"Convulsive Grand Mal Seizure With Intractable Seizure"|"3"|"0.75"  
"148659"|"Keppra XR 500 MG Oral Tablet Extended Release 24 Hour"|"74997"|"Partial Simple Seizure"|"5"|"0.714286"  
"148659"|"Keppra XR 500 MG Oral Tablet Extended Release 24 Hour"|"75000"|"Partial Simple Seizure With Intractable Seizure"|"2"|"0.4"  
"148659"|"Keppra XR 500 MG Oral Tablet Extended Release 24 Hour"|"75002"|"Partial Complex Psychomotor Seizure With Intractable Seizure"|"12"|"0.571429"  
"148659"|"Keppra XR 500 MG Oral Tablet Extended Release 24 Hour"|"252546"|"Generalized Convulsive Seizure"|"3"|"0.375"  
"148659"|"Keppra XR 500 MG Oral Tablet Extended Release 24 Hour"|"252548"|"Generalized Convulsive Clonic Seizure With Intractable Seizure"|"2"|"1"  
"148659"|"Keppra XR 500 MG Oral Tablet Extended Release 24 Hour"|"252551"|"Generalized Convulsive Tonic-clonic Seizure"|"3"|"0.6"  
"148659"|"Keppra XR 500 MG Oral Tablet Extended Release 24 Hour"|"252552"|"Generalized Convulsive Tonic-clonic Seizure With Intractable Seizure"|"2"|"0.666667"  
"148659"|"Keppra XR 500 MG Oral Tablet Extended Release 24 Hour"|"252566"|"Partial Complex Seizure"|"4"|"0.285714"  
"148659"|"Keppra XR 500 MG Oral Tablet Extended Release 24 Hour"|"252569"|"Partial Complex Seizure With Secondary Generalization"|"6"|"0.6"  
"148659"|"Keppra XR 500 MG Oral Tablet Extended Release 24 Hour"|"252570"|"Partial Complex Seizure With Secondary Generalization With Intractable Seizure"|"2"|"0.333333"  
"148659"|"Keppra XR 500 MG Oral Tablet Extended Release 24 Hour"|"289878"|"Generalized Convulsive Myoclonic Seizure, Juvenile"|"2"|"0.666667"  
"148659"|"Keppra XR 500 MG Oral Tablet Extended Release 24 Hour"|"297231"|"Epilepsy"|"6"|"0.666667"  
"148802"|"Carbidopa-Levodopa 25-100 MG Oral Tablet Dispersible"|"75080"|"Parkinson's Disease"|"2"|"0.5"  
"148828"|"Carbidopa-Levodopa 25-250 MG Oral Tablet Dispersible"|"75080"|"Parkinson's Disease"|"2"|"1"

"148834"|"Polyethylene Glycol 3350-GRX Oral Powder"|"166777"|"Constipation"|"2"|"1"  
"148837"|"Ipratropium-Albuterol 0.5-2.5 (3) MG/3ML Inhalation Solution"|"60874"|"Wheezing"|"2"|"1"  
"148837"|"Ipratropium-Albuterol 0.5-2.5 (3) MG/3ML Inhalation Solution"|"64181"|"Asthma"|"6"|"0.428571"  
"148837"|"Ipratropium-Albuterol 0.5-2.5 (3) MG/3ML Inhalation Solution"|"64205"|"Chronic Obstructive Pulmonary Disease"|"12"|"0.631579"  
"148837"|"Ipratropium-Albuterol 0.5-2.5 (3) MG/3ML Inhalation Solution"|"64210"|"Diffuse Obstructive Chronic Bronchitis"|"2"|"1"  
"148848"|"TRUEtest Test In Vitro Strip"|"69381"|"Type II Diabetes Mellitus"|"2"|"1"  
"148875"|"Vitamin D3 10000 UNIT Oral Capsule"|"68058"|"Vitamin D Deficiency"|"2"|"0.666667"  
"149048"|"Forteo 600 MCG/2.4ML Subcutaneous Solution"|"69341"|"Osteoporosis"|"19"|"0.904762"  
"149070"|"Venlafaxine HCl 150 MG Oral Tablet Extended Release 24 Hour"|"76363"|"Major Depression, Recurrent With Psychotic Features"|"2"|"1"  
"149071"|"Venlafaxine HCl 37.5 MG Oral Tablet Extended Release 24 Hour"|"76351"|"Depression"|"6"|"0.857143"  
"149071"|"Venlafaxine HCl 37.5 MG Oral Tablet Extended Release 24 Hour"|"76357"|"Major Depression, Recurrent"|"2"|"1"  
"149193"|"Omnitrope 10 MG/1.5ML Subcutaneous Solution"|"69214"|"Hypopituitarism"|"2"|"1"  
"149350"|"Galantamine Hydrobromide 24 MG Oral Capsule Extended Release 24 Hour"|"61048"|"Memory Lapses Or Loss"|"2"|"1"  
"149353"|"Stalevo 75 18.75-75-200 MG Oral Tablet"|"75080"|"Parkinson's Disease"|"3"|"0.6"  
"149354"|"Stalevo 125 31.25-125-200 MG Oral Tablet"|"75080"|"Parkinson's Disease"|"13"|"0.866667"  
"149360"|"Galantamine Hydrobromide 16 MG Oral Capsule Extended Release 24 Hour"|"61048"|"Memory Lapses Or Loss"|"5"|"0.833333"  
"149360"|"Galantamine Hydrobromide 16 MG Oral Capsule Extended Release 24 Hour"|"75020"|"Alzheimer's Disease"|"3"|"0.375"  
"149360"|"Galantamine Hydrobromide 16 MG Oral Capsule Extended Release 24 Hour"|"75032"|"Vascular Dementia"|"5"|"0.833333"  
"149360"|"Galantamine Hydrobromide 16 MG Oral Capsule Extended Release 24 Hour"|"275500"|"Cognitive Disorder"|"2"|"1"  
"149372"|"Aczone 5 % External Gel"|"63783"|"Atrophie Blanche"|"2"|"0.666667"  
"149372"|"Aczone 5 % External Gel"|"250919"|"Chronic Venous Hypertension With Ulcer And Inflammation"|"2"|"0.666667"  
"149418"|"Prezista 400 MG Oral Tablet"|"76835"|"HIV Infection"|"13"|"0.764706"  
"149418"|"Prezista 400 MG Oral Tablet"|"76842"|"Acquired Immunodeficiency Syndrome (AIDS)"|"2"|"0.4"  
"149433"|"Guaifenesin-Codeine 200-10 MG/5ML LIQD"|"60869"|"Cough"|"6"|"0.545455"  
"149433"|"Guaifenesin-Codeine 200-10 MG/5ML LIQD"|"64118"|"Acute Bronchitis"|"3"|"0.6"  
"149433"|"Guaifenesin-Codeine 200-10 MG/5ML LIQD"|"77891"|"Acute Upper Respiratory Infection"|"5"|"0.714286"  
"149485"|"Vitamin D 2000 UNIT Oral Tablet"|"68058"|"Vitamin D Deficiency"|"5"|"0.357143"  
"149574"|"PrednisoLONE Sodium Phosphate 6.7 (5 Base) MG/5ML Oral Solution"|"64180"|"Reactive Airway Disease"|"2"|"1"  
"149574"|"PrednisoLONE Sodium Phosphate 6.7 (5 Base) MG/5ML Oral Solution"|"69464"|"Congenital Adrenal Hyperplasia"|"5"|"1"  
"149619"|"CitraNatal Assure 35-1 & 300 MG Oral Miscellaneous"|"97487"|"Planning To Become Pregnant"|"5"|"0.454545"  
"149619"|"CitraNatal Assure 35-1 & 300 MG Oral Miscellaneous"|"203242"|"Patient Education - Preparation For Childbirth"|"3"|"1"  
"149619"|"CitraNatal Assure 35-1 & 300 MG Oral Miscellaneous"|"274406"|"Pregnancy Test Positive"|"3"|"0.3"  
"149636"|"Dorzolamide HCl-Timolol Mal 22.3-6.8 MG/ML Ophthalmic Solution"|"62066"|"Glaucoma"|"2"|"0.222222"  
"149748"|"Fenofibrate Micronized 134 MG Oral Capsule"|"67970"|"Hyperlipidemia"|"23"|"0.71875"  
"149748"|"Fenofibrate Micronized 134 MG Oral Capsule"|"257908"|"Essential Hypertriglyceridemia"|"2"|"0.333333"  
"149754"|"LevETIRAcetam 750 MG Oral Tablet"|"61040"|"Convulsions"|"3"|"0.6"  
"149754"|"LevETIRAcetam 750 MG Oral Tablet"|"74988"|"Seizure Disorder"|"11"|"0.392857"  
"149754"|"LevETIRAcetam 750 MG Oral Tablet"|"74989"|"Generalized Convulsive Grand Mal Seizure"|"2"|"1"  
"149754"|"LevETIRAcetam 750 MG Oral Tablet"|"75001"|"Partial Complex Psychomotor Seizure"|"6"|"0.666667"

"149754"|"LevETIRAcetam 750 MG Oral Tablet"|"75002"|"Partial Complex Psychomotor Seizure With Intractable Seizure"|"7"|"0.538462"  
"149754"|"LevETIRAcetam 750 MG Oral Tablet"|"252546"|"Generalized Convulsive Seizure"|"2"|"0.285714"  
"149754"|"LevETIRAcetam 750 MG Oral Tablet"|"252551"|"Generalized Convulsive Tonic-clonic Seizure"|"2"|"0.666667"  
"149754"|"LevETIRAcetam 750 MG Oral Tablet"|"252566"|"Partial Complex Seizure"|"8"|"0.615385"  
"149754"|"LevETIRAcetam 750 MG Oral Tablet"|"289879"|"Generalized Convulsive Myoclonic Seizure, Juvenile With Intractable Seizure"|"2"|"1"  
"149756"|"Fenofibrate Micronized 200 MG Oral Capsule"|"67970"|"Hyperlipidemia"|"17"|"0.894737"  
"149760"|"Fenofibrate Micronized 67 MG Oral Capsule"|"67970"|"Hyperlipidemia"|"3"|"0.5"  
"149762"|"LevETIRAcetam 250 MG Oral Tablet"|"74988"|"Seizure Disorder"|"9"|"0.290323"  
"149762"|"LevETIRAcetam 250 MG Oral Tablet"|"74989"|"Generalized Convulsive Grand Mal Seizure"|"2"|"0.666667"  
"149762"|"LevETIRAcetam 250 MG Oral Tablet"|"75001"|"Partial Complex Psychomotor Seizure"|"2"|"0.666667"  
"149762"|"LevETIRAcetam 250 MG Oral Tablet"|"75002"|"Partial Complex Psychomotor Seizure With Intractable Seizure"|"2"|"0.5"  
"149762"|"LevETIRAcetam 250 MG Oral Tablet"|"75104"|"Familial (Benign Essential) Tremor"|"5"|"1"  
"149762"|"LevETIRAcetam 250 MG Oral Tablet"|"165611"|"Myoclonus"|"2"|"0.666667"  
"149762"|"LevETIRAcetam 250 MG Oral Tablet"|"252553"|"Generalized Nonconvulsive Seizure"|"3"|"1"  
"149762"|"LevETIRAcetam 250 MG Oral Tablet"|"252569"|"Partial Complex Seizure With Secondary Generalization"|"2"|"0.666667"  
"149762"|"LevETIRAcetam 250 MG Oral Tablet"|"252570"|"Partial Complex Seizure With Secondary Generalization With Intractable Seizure"|"2"|"1"  
"149762"|"LevETIRAcetam 250 MG Oral Tablet"|"288824"|"Convulsive Disorder"|"2"|"0.4"  
"149762"|"LevETIRAcetam 250 MG Oral Tablet"|"297231"|"Epilepsy"|"3"|"0.6"  
"149785"|"LevETIRAcetam 500 MG Oral Tablet"|"61040"|"Convulsions"|"16"|"0.592593"  
"149785"|"LevETIRAcetam 500 MG Oral Tablet"|"74988"|"Seizure Disorder"|"74"|"0.379487"  
"149785"|"LevETIRAcetam 500 MG Oral Tablet"|"74989"|"Generalized Convulsive Grand Mal Seizure"|"7"|"0.583333"  
"149785"|"LevETIRAcetam 500 MG Oral Tablet"|"74990"|"Convulsive Grand Mal Seizure With Intractable Seizure"|"16"|"0.761905"  
"149785"|"LevETIRAcetam 500 MG Oral Tablet"|"74992"|"Generalized Convulsive Myoclonic Seizure With Intractable Seizure"|"2"|"1"  
"149785"|"LevETIRAcetam 500 MG Oral Tablet"|"74997"|"Partial Simple Seizure"|"6"|"0.333333"  
"149785"|"LevETIRAcetam 500 MG Oral Tablet"|"75001"|"Partial Complex Psychomotor Seizure"|"5"|"0.714286"  
"149785"|"LevETIRAcetam 500 MG Oral Tablet"|"75002"|"Partial Complex Psychomotor Seizure With Intractable Seizure"|"24"|"0.6"  
"149785"|"LevETIRAcetam 500 MG Oral Tablet"|"75354"|"Cerebral Artery Thrombosis - With Cerebral Infarction"|"2"|"0.25"  
"149785"|"LevETIRAcetam 500 MG Oral Tablet"|"252546"|"Generalized Convulsive Seizure"|"15"|"0.5"  
"149785"|"LevETIRAcetam 500 MG Oral Tablet"|"252547"|"Generalized Convulsive Clonic Seizure"|"5"|"0.555556"  
"149785"|"LevETIRAcetam 500 MG Oral Tablet"|"252548"|"Generalized Convulsive Clonic Seizure With Intractable Seizure"|"2"|"1"  
"149785"|"LevETIRAcetam 500 MG Oral Tablet"|"252550"|"Generalized Convulsive Tonic Seizure With Intractable Seizure"|"3"|"0.75"  
"149785"|"LevETIRAcetam 500 MG Oral Tablet"|"252551"|"Generalized Convulsive Tonic-clonic Seizure"|"8"|"0.571429"  
"149785"|"LevETIRAcetam 500 MG Oral Tablet"|"252552"|"Generalized Convulsive Tonic-clonic Seizure With Intractable Seizure"|"19"|"0.730769"  
"149785"|"LevETIRAcetam 500 MG Oral Tablet"|"252553"|"Generalized Nonconvulsive Seizure"|"4"|"0.8"  
"149785"|"LevETIRAcetam 500 MG Oral Tablet"|"252560"|"Motor Partial Seizure"|"3"|"0.6"  
"149785"|"LevETIRAcetam 500 MG Oral Tablet"|"252561"|"Motor Partial Seizure With Intractable Seizure"|"2"|"0.5"  
"149785"|"LevETIRAcetam 500 MG Oral Tablet"|"252566"|"Partial Complex Seizure"|"28"|"0.595745"  
"149785"|"LevETIRAcetam 500 MG Oral Tablet"|"252567"|"Partial Complex Psychosensory Seizure"|"2"|"0.666667"

"149785""LevETIRAcetam 500 MG Oral Tablet""252568""Partial Complex Psychosensory Seizure With Intractable Seizure""3""1"

"149785""LevETIRAcetam 500 MG Oral Tablet""252569""Partial Complex Seizure With Secondary Generalization""5""0.3125"

"149785""LevETIRAcetam 500 MG Oral Tablet""252570""Partial Complex Seizure With Secondary Generalization With Intractable Seizure""8""0.470588"

"149785""LevETIRAcetam 500 MG Oral Tablet""288824""Convulsive Disorder""10""0.526316"

"149785""LevETIRAcetam 500 MG Oral Tablet""297231""Epilepsy""10""0.454545"

"149795""Tobramycin-Dexamethasone 0.3-0.1 % Ophthalmic Suspension""61463""Conjunctivitis In Both Eyes""2""1"

"149795""Tobramycin-Dexamethasone 0.3-0.1 % Ophthalmic Suspension""287562""Acute Conjunctivitis Of Both Eyes""2""1"

"149805""Hydrocortisone Ace-Pramoxine 1-1 % Rectal Cream""65150""Anal Fissure""4""0.666667"

"149872""Periflex Infant Oral Powder""75807""Phenylketonuria""3""0.6"

"149931""Omega-3 Fish Oil 1000 MG Oral Capsule""67970""Hyperlipidemia""2""0.25"

"149934""Budesonide 0.25 MG/2ML Inhalation Suspension""64181""Asthma""2""0.25"

"149946""Budesonide 0.5 MG/2ML Inhalation Suspension""62586""Chronic Maxillary Sinusitis""3""0.130435"

"149946""Budesonide 0.5 MG/2ML Inhalation Suspension""62587""Chronic Frontal Sinusitis""5""0.2"

"149946""Budesonide 0.5 MG/2ML Inhalation Suspension""62588""Chronic Ethmoidal Sinusitis""19""0.703704"

"149946""Budesonide 0.5 MG/2ML Inhalation Suspension""62590""Chronic Pansinusitis""2""0.5"

"149946""Budesonide 0.5 MG/2ML Inhalation Suspension""64180""Reactive Airway Disease""2""0.4"

"149946""Budesonide 0.5 MG/2ML Inhalation Suspension""64181""Asthma""5""0.151515"

"149946""Budesonide 0.5 MG/2ML Inhalation Suspension""64205""Chronic Obstructive Pulmonary Disease""2""0.285714"

"149946""Budesonide 0.5 MG/2ML Inhalation Suspension""289126""Eosinophilic Esophagitis""3""1"

"149948""Requip XL 12 MG Oral Tablet Extended Release 24 Hour""75080""Parkinson's Disease""6""0.857143"

"149949""FLUoxetine HCl (PMDD) 10 MG Oral Capsule""288796""Premenstrual Syndromes""2""1"

"149953""Ascensia Autodisc Test In Vitro Disk""69380""Diabetes Mellitus""3""0.75"

"150017""Stavudine 20 MG Oral Capsule""76835""HIV Infection""2""1"

"150019""Stavudine 40 MG Oral Capsule""76835""HIV Infection""4""0.8"

"150020""Azurette 0.15-0.02/0.01 MG (21/5) Oral Tablet""69549""Polycystic Ovarian Syndrome""3""1"

"150024""Calcitonin (Salmon) 200 UNIT/ACT Nasal Solution""69341""Osteoporosis""8""0.727273"

"150024""Calcitonin (Salmon) 200 UNIT/ACT Nasal Solution""69346""Drug-induced Osteoporosis""2""1"

"150031""Trilipix 135 MG Oral Capsule Delayed Release""67970""Hyperlipidemia""59""0.578431"

"150031""Trilipix 135 MG Oral Capsule Delayed Release""257908""Essential Hypertriglyceridemia""7""0.636364"

"150031""Trilipix 135 MG Oral Capsule Delayed Release""283292""Essential Hypercholesterolemia""6""0.4"

"150031""Trilipix 135 MG Oral Capsule Delayed Release""291485""Dyslipidemia""4""0.285714"

"150032""Trilipix 45 MG Oral Capsule Delayed Release""67970""Hyperlipidemia""9""0.428571"

"150034""Claritin 10 MG Oral Capsule""62578""Acute Sinusitis""2""0.222222"

"150034""Claritin 10 MG Oral Capsule""62598""Allergic Rhinitis""45""0.5625"

"150034""Claritin 10 MG Oral Capsule""77890""Upper Respiratory Infection""2""0.2"

"150034""Claritin 10 MG Oral Capsule""77891""Acute Upper Respiratory Infection""3""0.130435"

"150035""Pseudoephedrine HCl 120 MG Oral Tablet Extended Release 12 Hour""77891""Acute Upper Respiratory Infection""4""0.666667"

"150092""Flovent Diskus 100 MCG/BLIST Inhalation Aerosol Powder Breath Activated""64181""Asthma""3""0.5"

"150127""SEROquel XR 50 MG Oral Tablet Extended Release 24 Hour""76212""Psychosis""3""0.5"

"150127""SEROquel XR 50 MG Oral Tablet Extended Release 24 Hour""76306""Episodic Mood Disorders""3""0.75"

"150127""SEROquel XR 50 MG Oral Tablet Extended Release 24 Hour""76348""Bipolar II Disorder""2""0.5"

"150127""SEROquel XR 50 MG Oral Tablet Extended Release 24 Hour""76351""Depression""5""0.263158"

"150127""SEROquel XR 50 MG Oral Tablet Extended Release 24 Hour""76357""Major Depression, Recurrent""3""0.6"

"150127""SEROquel XR 50 MG Oral Tablet Extended Release 24 Hour""76388""Bipolar Disorder NOS""16""0.8"

"150127""SEROquel XR 50 MG Oral Tablet Extended Release 24 Hour""76389""Atypical Depressive

Disorder"|"2"|"1"  
"150128"|"SEROquel XR 150 MG Oral Tablet Extended Release 24 Hour"|"76306"|"Episodic Mood Disorders"|"3"|"1"  
"150128"|"SEROquel XR 150 MG Oral Tablet Extended Release 24 Hour"|"76307"|"Bipolar Disorder"|"2"|"0.4"  
"150128"|"SEROquel XR 150 MG Oral Tablet Extended Release 24 Hour"|"76339"|"Bipolar I Disorder, Most Recent Episode, Depressed"|"3"|"1"  
"150128"|"SEROquel XR 150 MG Oral Tablet Extended Release 24 Hour"|"76351"|"Depression"|"4"|"0.571429"  
"150128"|"SEROquel XR 150 MG Oral Tablet Extended Release 24 Hour"|"76388"|"Bipolar Disorder NOS"|"4"|"1"  
"150128"|"SEROquel XR 150 MG Oral Tablet Extended Release 24 Hour"|"196089"|"Adjustment Disorder With Anxiety And Depressed Mood"|"2"|"0.666667"  
"150155"|"SUMAtriptan 20 MG/ACT Nasal Solution"|"74533"|"Migraine Headache"|"2"|"0.666667"  
"150156"|"SUMAtriptan Succinate 100 MG Oral Tablet"|"60828"|"Headache"|"2"|"0.5"  
"150156"|"SUMAtriptan Succinate 100 MG Oral Tablet"|"74533"|"Migraine Headache"|"17"|"0.459459"  
"150156"|"SUMAtriptan Succinate 100 MG Oral Tablet"|"74534"|"Classic Migraine (With Aura)"|"2"|"0.25"  
"150156"|"SUMAtriptan Succinate 100 MG Oral Tablet"|"74535"|"Classic Migraine (With Aura) With Intractable Migraine"|"3"|"0.75"  
"150156"|"SUMAtriptan Succinate 100 MG Oral Tablet"|"74537"|"Common Migraine (Without Aura)"|"6"|"0.545455"  
"150156"|"SUMAtriptan Succinate 100 MG Oral Tablet"|"74538"|"Common Migraine (Without Aura) With Intractable Migraine"|"3"|"0.75"  
"150156"|"SUMAtriptan Succinate 100 MG Oral Tablet"|"74549"|"Menstrual Migraine Headache"|"2"|"0.666667"  
"150156"|"SUMAtriptan Succinate 100 MG Oral Tablet"|"293498"|"Chronic Common Migraine (Without Aura)"|"3"|"0.75"  
"150157"|"SUMAtriptan Succinate 25 MG Oral Tablet"|"60828"|"Headache"|"6"|"0.428571"  
"150157"|"SUMAtriptan Succinate 25 MG Oral Tablet"|"74529"|"Headache Syndromes"|"2"|"0.4"  
"150157"|"SUMAtriptan Succinate 25 MG Oral Tablet"|"74533"|"Migraine Headache"|"14"|"0.666667"  
"150157"|"SUMAtriptan Succinate 25 MG Oral Tablet"|"74534"|"Classic Migraine (With Aura)"|"5"|"0.625"  
"150157"|"SUMAtriptan Succinate 25 MG Oral Tablet"|"74537"|"Common Migraine (Without Aura)"|"7"|"0.583333"  
"150157"|"SUMAtriptan Succinate 25 MG Oral Tablet"|"74549"|"Menstrual Migraine Headache"|"2"|"1"  
"150158"|"SUMAtriptan Succinate 50 MG Oral Tablet"|"60828"|"Headache"|"12"|"0.6"  
"150158"|"SUMAtriptan Succinate 50 MG Oral Tablet"|"74533"|"Migraine Headache"|"27"|"0.5"  
"150158"|"SUMAtriptan Succinate 50 MG Oral Tablet"|"74534"|"Classic Migraine (With Aura)"|"4"|"0.333333"  
"150158"|"SUMAtriptan Succinate 50 MG Oral Tablet"|"74535"|"Classic Migraine (With Aura) With Intractable Migraine"|"2"|"0.666667"  
"150158"|"SUMAtriptan Succinate 50 MG Oral Tablet"|"74537"|"Common Migraine (Without Aura)"|"12"|"0.666667"  
"150158"|"SUMAtriptan Succinate 50 MG Oral Tablet"|"74538"|"Common Migraine (Without Aura) With Intractable Migraine"|"6"|"0.75"  
"150158"|"SUMAtriptan Succinate 50 MG Oral Tablet"|"293498"|"Chronic Common Migraine (Without Aura)"|"4"|"1"  
"150159"|"Banzel 400 MG Oral Tablet"|"74988"|"Seizure Disorder"|"3"|"0.272727"  
"150159"|"Banzel 400 MG Oral Tablet"|"74990"|"Convulsive Grand Mal Seizure With Intractable Seizure"|"2"|"0.5"  
"150159"|"Banzel 400 MG Oral Tablet"|"75002"|"Partial Complex Psychomotor Seizure With Intractable Seizure"|"4"|"0.666667"  
"150159"|"Banzel 400 MG Oral Tablet"|"288823"|"Lennox-Gastaut Syndrome"|"2"|"0.285714"  
"150159"|"Banzel 400 MG Oral Tablet"|"297231"|"Epilepsy"|"2"|"1"  
"150160"|"LevETIRAcetam 1000 MG Oral Tablet"|"74988"|"Seizure Disorder"|"17"|"0.333333"  
"150160"|"LevETIRAcetam 1000 MG Oral Tablet"|"74989"|"Generalized Convulsive Grand Mal Seizure"|"4"|"1"  
"150160"|"LevETIRAcetam 1000 MG Oral Tablet"|"74990"|"Convulsive Grand Mal Seizure With Intractable Seizure"|"3"|"0.75"  
"150160"|"LevETIRAcetam 1000 MG Oral Tablet"|"74997"|"Partial Simple Seizure"|"3"|"0.5"  
"150160"|"LevETIRAcetam 1000 MG Oral Tablet"|"75000"|"Partial Simple Seizure With Intractable Seizure"|"3"|"0.5"  
"150160"|"LevETIRAcetam 1000 MG Oral Tablet"|"75001"|"Partial Complex Psychomotor Seizure"|"5"|"0.555556"  
"150160"|"LevETIRAcetam 1000 MG Oral Tablet"|"75002"|"Partial Complex Psychomotor Seizure With Intractable Seizure"|"16"|"0.695652"  
"150160"|"LevETIRAcetam 1000 MG Oral Tablet"|"252547"|"Generalized Convulsive Clonic Seizure"|"3"|"1"  
"150160"|"LevETIRAcetam 1000 MG Oral Tablet"|"252566"|"Partial Complex Seizure"|"6"|"0.5"  
"150160"|"LevETIRAcetam 1000 MG Oral Tablet"|"252569"|"Partial Complex Seizure With Secondary

Generalization|"2|"0.5"  
"150160|"LevETIRAcetam 1000 MG Oral Tablet|"252570|"Partial Complex Seizure With Secondary Generalization With Intractable Seizure|"3|"0.5"  
"150160|"LevETIRAcetam 1000 MG Oral Tablet|"289879|"Generalized Convulsive Myoclonic Seizure, Juvenile With Intractable Seizure|"3|"1"  
"150160|"LevETIRAcetam 1000 MG Oral Tablet|"297231|"Epilepsy|"4|"0.8"  
"150161|"LevETIRAcetam 100 MG/ML Oral Solution|"61040|"Convulsions|"3|"0.1875"  
"150161|"LevETIRAcetam 100 MG/ML Oral Solution|"74988|"Seizure Disorder|"61|"0.655914"  
"150161|"LevETIRAcetam 100 MG/ML Oral Solution|"74992|"Generalized Convulsive Myoclonic Seizure With Intractable Seizure|"2|"1"  
"150161|"LevETIRAcetam 100 MG/ML Oral Solution|"75001|"Partial Complex Psychomotor Seizure|"2|"0.4"  
"150161|"LevETIRAcetam 100 MG/ML Oral Solution|"75002|"Partial Complex Psychomotor Seizure With Intractable Seizure|"2|"0.333333"  
"150161|"LevETIRAcetam 100 MG/ML Oral Solution|"252552|"Generalized Convulsive Tonic-clonic Seizure With Intractable Seizure|"2|"1"  
"150161|"LevETIRAcetam 100 MG/ML Oral Solution|"252566|"Partial Complex Seizure|"3|"0.5"  
"150161|"LevETIRAcetam 100 MG/ML Oral Solution|"252570|"Partial Complex Seizure With Secondary Generalization With Intractable Seizure|"2|"0.5"  
"150161|"LevETIRAcetam 100 MG/ML Oral Solution|"297231|"Epilepsy|"10|"0.666667"  
"150162|"Banzel 200 MG Oral Tablet|"74988|"Seizure Disorder|"6|"0.6"  
"150162|"Banzel 200 MG Oral Tablet|"74990|"Convulsive Grand Mal Seizure With Intractable Seizure|"2|"0.5"  
"150249|"Epiduo 0.1-2.5 % External Gel|"69606|"Acne|"9|"0.692308"  
"150295|"Coenzyme Q-10 400 MG Oral Capsule|"67970|"Hyperlipidemia|"3|"0.428571"  
"150297|"Coenzyme Q-10 100 MG Oral Capsule|"257912|"Disorder Of Mitochondrial Metabolism|"3|"0.75"  
"150321|"AmLODIPine Besylate Powder|"63467|"Hypertension|"11|"0.55"  
"150420|"Kionex 15 GM/60ML Oral Suspension|"68087|"Hyperkalemia|"3|"1"  
"151078|"Divalproex Sodium 125 MG Oral Capsule Sprinkle|"74988|"Seizure Disorder|"8|"0.615385"  
"151078|"Divalproex Sodium 125 MG Oral Capsule Sprinkle|"251600|"Dementia|"4|"0.8"  
"151078|"Divalproex Sodium 125 MG Oral Capsule Sprinkle|"289876|"Alzheimer's Disease With Behavioral Disturbance|"4|"0.8"  
"151078|"Divalproex Sodium 125 MG Oral Capsule Sprinkle|"297231|"Epilepsy|"2|"0.666667"  
"151089|"PriLOSEC 10 MG Oral Packet|"64688|"Esophageal Reflux|"3|"0.6"  
"151153|"Divalproex Sodium 500 MG Oral Tablet Extended Release 24 Hour|"30261|"Bipolar I Disorder, Most Recent Episode, Depressed - Severe With Psychotic Features|"3|"0.75"  
"151153|"Divalproex Sodium 500 MG Oral Tablet Extended Release 24 Hour|"60828|"Headache|"2|"0.2"  
"151153|"Divalproex Sodium 500 MG Oral Tablet Extended Release 24 Hour|"74988|"Seizure Disorder|"9|"0.272727"  
"151153|"Divalproex Sodium 500 MG Oral Tablet Extended Release 24 Hour|"75002|"Partial Complex Psychomotor Seizure With Intractable Seizure|"4|"0.571429"  
"151153|"Divalproex Sodium 500 MG Oral Tablet Extended Release 24 Hour|"75032|"Vascular Dementia|"2|"1"  
"151153|"Divalproex Sodium 500 MG Oral Tablet Extended Release 24 Hour|"76213|"Schizophrenia|"3|"0.5"  
"151153|"Divalproex Sodium 500 MG Oral Tablet Extended Release 24 Hour|"76232|"Paranoid Schizophrenia|"10|"1"  
"151153|"Divalproex Sodium 500 MG Oral Tablet Extended Release 24 Hour|"76238|"Paranoid Schizophrenia, Stable|"2|"1"  
"151153|"Divalproex Sodium 500 MG Oral Tablet Extended Release 24 Hour|"76272|"Schizoaffective Disorder|"7|"0.7"  
"151153|"Divalproex Sodium 500 MG Oral Tablet Extended Release 24 Hour|"76276|"Schizoaffective Disorder - Chronic (With Residual Symptoms)"|"3|"0.75"  
"151153|"Divalproex Sodium 500 MG Oral Tablet Extended Release 24 Hour|"76306|"Episodic Mood Disorders|"7|"0.7"  
"151153|"Divalproex Sodium 500 MG Oral Tablet Extended Release 24 Hour|"76307|"Bipolar Disorder|"6|"0.333333"  
"151153|"Divalproex Sodium 500 MG Oral Tablet Extended Release 24 Hour|"76325|"Bipolar I Disorder, Most

Recent Episode, Mixed - Moderate|"2"|0.5"  
"151153|"Divalproex Sodium 500 MG Oral Tablet Extended Release 24 Hour|"76344|"Bipolar I Disorder, Most  
Recent Episode, Depressed - Severe|"2"|1"  
"151153|"Divalproex Sodium 500 MG Oral Tablet Extended Release 24 Hour|"76348|"Bipolar II  
Disorder|"2"|0.666667"  
"151153|"Divalproex Sodium 500 MG Oral Tablet Extended Release 24 Hour|"76351|"Depression|"4"|0.133333"  
"151153|"Divalproex Sodium 500 MG Oral Tablet Extended Release 24 Hour|"76388|"Bipolar Disorder  
NOS|"14"|0.777778"  
"151153|"Divalproex Sodium 500 MG Oral Tablet Extended Release 24 Hour|"252546|"Generalized Convulsive  
Seizure|"5"|0.625"  
"151153|"Divalproex Sodium 500 MG Oral Tablet Extended Release 24 Hour|"252552|"Generalized Convulsive  
Tonic-clonic Seizure With Intractable Seizure|"6"|1"  
"151153|"Divalproex Sodium 500 MG Oral Tablet Extended Release 24 Hour|"252566|"Partial Complex  
Seizure|"4"|0.363636"  
"151153|"Divalproex Sodium 500 MG Oral Tablet Extended Release 24 Hour|"289879|"Generalized Convulsive  
Myoclonic Seizure, Juvenile With Intractable Seizure|"4"|0.8"  
"151153|"Divalproex Sodium 500 MG Oral Tablet Extended Release 24 Hour|"297231|"Epilepsy|"2"|0.4"  
"151165|"Divalproex Sodium 250 MG Oral Tablet Extended Release 24 Hour|"74988|"Seizure  
Disorder|"3"|0.375"  
"151165|"Divalproex Sodium 250 MG Oral Tablet Extended Release 24 Hour|"75002|"Partial Complex  
Psychomotor Seizure With Intractable Seizure|"3"|1"  
"151165|"Divalproex Sodium 250 MG Oral Tablet Extended Release 24 Hour|"76306|"Episodic Mood  
Disorders|"3"|0.75"  
"151165|"Divalproex Sodium 250 MG Oral Tablet Extended Release 24 Hour|"76307|"Bipolar Disorder|"3"|0.6"  
"151165|"Divalproex Sodium 250 MG Oral Tablet Extended Release 24 Hour|"76351|"Depression|"2"|0.2"  
"151165|"Divalproex Sodium 250 MG Oral Tablet Extended Release 24 Hour|"76388|"Bipolar Disorder  
NOS|"2"|0.5"  
"151172|"Loratadine-Pseudoephedrine 10-240 MG Oral Tablet Extended Release 24  
Hour|"60869|"Cough|"3"|0.333333"  
"151172|"Loratadine-Pseudoephedrine 10-240 MG Oral Tablet Extended Release 24  
Hour|"62577|"Sinusitis|"2"|0.333333"  
"151172|"Loratadine-Pseudoephedrine 10-240 MG Oral Tablet Extended Release 24 Hour|"62598|"Allergic  
Rhinitis|"8"|0.363636"  
"151172|"Loratadine-Pseudoephedrine 10-240 MG Oral Tablet Extended Release 24 Hour|"62760|"Acute  
Pharyngitis|"2"|0.5"  
"151172|"Loratadine-Pseudoephedrine 10-240 MG Oral Tablet Extended Release 24 Hour|"77891|"Acute Upper  
Respiratory Infection|"8"|0.571429"  
"151172|"Loratadine-Pseudoephedrine 10-240 MG Oral Tablet Extended Release 24  
Hour|"93702|"Allergies|"3"|0.5"  
"151253|"Metoclopramide HCl 1 MG/ML Oral Solution|"64688|"Esophageal Reflux|"5"|0.625"  
"151316|"Microlet Lancets Miscellaneous|"69380|"Diabetes Mellitus|"2"|0.333333"  
"151316|"Microlet Lancets Miscellaneous|"69402|"Diabetes Mellitus Poorly Controlled|"3"|0.5"  
"151317|"Cetirizine HCl Childrens 5 MG/5ML Oral Solution|"62598|"Allergic Rhinitis|"10"|0.714286"  
"151320|"Uloric 40 MG Oral Tablet|"70384|"Gout|"11"|0.6875"  
"151320|"Uloric 40 MG Oral Tablet|"70387|"Chronic Gout|"5"|0.625"  
"151320|"Uloric 40 MG Oral Tablet|"70388|"Chronic Tophaceous Gout|"4"|1"  
"151323|"Uloric 80 MG Oral Tablet|"70384|"Gout|"3"|0.6"  
"151361|"RisperiDONE 0.5 MG Oral Tablet Dispersible|"76351|"Depression|"2"|0.666667"  
"151364|"ProCentra 5 MG/5ML Oral Solution|"275486|"ADHD, Combined Type|"3"|0.75"  
"151370|"Toviaz 4 MG Oral Tablet Extended Release 24 Hour|"65784|"Hyperactivity Of The Bladder|"2"|1"  
"151378|"RisperiDONE M-TAB 1 MG Oral Tablet Dispersible|"75930|"Mood Disorder Of Unknown (Axis III)  
Etiology|"2"|1"  
"151427|"DME|"61065|"Abnormality Of Walk|"5"|0.384615"  
"151427|"DME|"63217|"Congestive Heart Failure|"5"|0.208333"

"151427""DME""63909""Varicose Veins""4""0.444444"  
"151427""DME""63913""Varicose Veins With Ulcer""2""0.666667"  
"151427""DME""64205""Chronic Obstructive Pulmonary Disease""6""0.375"  
"151427""DME""69380""Diabetes Mellitus""14""0.184211"  
"151427""DME""69381""Type II Diabetes Mellitus""7""0.189189"  
"151427""DME""69382""Type II Diabetes Mellitus - Uncomplicated, Uncontrolled""3""0.214286"  
"151427""DME""69402""Diabetes Mellitus Poorly Controlled""5""0.208333"  
"151427""DME""69424""Diabetic Peripheral Neuropathy""3""0.25"  
"151427""DME""69447""Diabetic Foot Ulcer""2""0.666667"  
"151427""DME""69527""Orthostatic Hypotension""2""0.2"  
"151427""DME""69693""Chronic Nondecubitus Ulcer Of The Foot""2""0.4"  
"151427""DME""75374""Late CVD Effects: Hemiplegia""2""0.5"  
"151427""DME""83430""Unspecified Debility""5""0.416667"  
"151427""DME""91089""Lower Back Pain""3""0.230769"  
"151427""DME""97011""A Fall""4""0.285714"  
"151427""DME""173466""Obstructive Sleep Apnea""3""0.230769"  
"151427""DME""250903""Varicose Veins With Pain""5""0.625"  
"151427""DME""250924""Varicose Veins With Swelling""3""0.375"  
"151427""DME""251467""Limb Pain""5""0.25"  
"151427""DME""251468""Limb Swelling""7""0.636364"  
"151427""DME""251600""Dementia""7""0.269231"  
"151427""DME""257802""Venous Thrombosis Of The Deep Vessels Of The Lower Extremity""3""0.375"  
"151427""DME""257996""Arthritis""9""0.310345"  
"151427""DME""282672""Venous Insufficiency""14""0.7"  
"151427""DME""282680""Edema""17""0.53125"  
"151427""DME""288944""Disturbance Of Gait""10""0.588235"  
"151427""DME""296351""Frailty""2""1"  
"151430""Vimpat 150 MG Oral Tablet""75002""Partial Complex Psychomotor Seizure With Intractable Seizure""11""0.846154"  
"151430""Vimpat 150 MG Oral Tablet""252570""Partial Complex Seizure With Secondary Generalization With Intractable Seizure""3""0.6"  
"151443""Vimpat 200 MG Oral Tablet""74988""Seizure Disorder""8""0.5"  
"151443""Vimpat 200 MG Oral Tablet""74990""Convulsive Grand Mal Seizure With Intractable Seizure""2""0.666667"  
"151443""Vimpat 200 MG Oral Tablet""74992""Generalized Convulsive Myoclonic Seizure With Intractable Seizure""2""1"  
"151443""Vimpat 200 MG Oral Tablet""75002""Partial Complex Psychomotor Seizure With Intractable Seizure""15""0.75"  
"151443""Vimpat 200 MG Oral Tablet""252550""Generalized Convulsive Tonic Seizure With Intractable Seizure""3""0.6"  
"151443""Vimpat 200 MG Oral Tablet""252570""Partial Complex Seizure With Secondary Generalization With Intractable Seizure""3""0.6"  
"151446""Vimpat 100 MG Oral Tablet""74988""Seizure Disorder""13""0.333333"  
"151446""Vimpat 100 MG Oral Tablet""74990""Convulsive Grand Mal Seizure With Intractable Seizure""5""0.555556"  
"151446""Vimpat 100 MG Oral Tablet""75000""Partial Simple Seizure With Intractable Seizure""2""0.5"  
"151446""Vimpat 100 MG Oral Tablet""75002""Partial Complex Psychomotor Seizure With Intractable Seizure""30""0.75"  
"151446""Vimpat 100 MG Oral Tablet""252546""Generalized Convulsive Seizure""2""0.285714"  
"151446""Vimpat 100 MG Oral Tablet""252550""Generalized Convulsive Tonic Seizure With Intractable Seizure""2""0.5"  
"151446""Vimpat 100 MG Oral Tablet""252552""Generalized Convulsive Tonic-clonic Seizure With Intractable Seizure""3""0.5"  
"151446""Vimpat 100 MG Oral Tablet""252566""Partial Complex Seizure""4""0.333333"

"151446""Vimpat 100 MG Oral Tablet""252568""Partial Complex Psychosensory Seizure With Intractable Seizure""2""1"

"151446""Vimpat 100 MG Oral Tablet""252570""Partial Complex Seizure With Secondary Generalization With Intractable Seizure""6""0.4"

"151446""Vimpat 100 MG Oral Tablet""289879""Generalized Convulsive Myoclonic Seizure, Juvenile With Intractable Seizure""2""1"

"151446""Vimpat 100 MG Oral Tablet""297231""Epilepsy""2""0.666667"

"151450""PX Omeprazole 20 MG Oral Tablet Delayed Release""64688""Esophageal Reflux""2""1"

"151461""Vimpat 50 MG Oral Tablet""74988""Seizure Disorder""4""0.4"

"151461""Vimpat 50 MG Oral Tablet""75002""Partial Complex Psychomotor Seizure With Intractable Seizure""13""0.764706"

"151461""Vimpat 50 MG Oral Tablet""252552""Generalized Convulsive Tonic-clonic Seizure With Intractable Seizure""2""1"

"151461""Vimpat 50 MG Oral Tablet""252566""Partial Complex Seizure""3""0.6"

"151461""Vimpat 50 MG Oral Tablet""252569""Partial Complex Seizure With Secondary Generalization""3""0.75"

"151461""Vimpat 50 MG Oral Tablet""252570""Partial Complex Seizure With Secondary Generalization With Intractable Seizure""3""1"

"151461""Vimpat 50 MG Oral Tablet""297231""Epilepsy""4""0.8"

"151462""Aluminum Chloride 20 % External Solution""117347""Hyperhidrosis (On Exam)""3""1"

"151462""Aluminum Chloride 20 % External Solution""259126""Hyperhidrosis""8""0.8"

"151491""Pulmicort Flexhaler 180 MCG/ACT Inhalation Aerosol Powder Breath Activated""64181""Asthma""5""0.454545"

"151503""Norgestrel-Ethinyl Estradiol 0.3-30 MG-MCG Oral Tablet""187792""Gynecologic Services Contraceptive Management""2""1"

"151503""Norgestrel-Ethinyl Estradiol 0.3-30 MG-MCG Oral Tablet""250989""Oral Contraceptives""2""1"

"151517""Synvisc One 8 MG/ML Intra-articular Injectable""70146""Osteoarthritis""2""1"

"151517""Synvisc One 8 MG/ML Intra-articular Injectable""70193""Localized Osteoarthritis Of The Knee""10""0.833333"

"151517""Synvisc One 8 MG/ML Intra-articular Injectable""85623""Joint Pain, Localized In The Knee""3""0.428571"

"151518""Pulmicort Flexhaler 90 MCG/ACT Inhalation Aerosol Powder Breath Activated""60874""Wheezing""2""0.4"

"151518""Pulmicort Flexhaler 90 MCG/ACT Inhalation Aerosol Powder Breath Activated""64118""Acute Bronchitis""6""1"

"151518""Pulmicort Flexhaler 90 MCG/ACT Inhalation Aerosol Powder Breath Activated""64181""Asthma""8""0.571429"

"151542""Liothyronine Sodium 5 MCG Oral Tablet""69258""Hypothyroidism""24""0.648649"

"151542""Liothyronine Sodium 5 MCG Oral Tablet""69260""Hypothyroidism Postablative""3""1"

"151542""Liothyronine Sodium 5 MCG Oral Tablet""69296""Nontoxic Multinodular Goiter""2""0.666667"

"151542""Liothyronine Sodium 5 MCG Oral Tablet""283296""Abnormal Weight Gain""2""0.5"

"151551""Liothyronine Sodium 25 MCG Oral Tablet""69258""Hypothyroidism""3""0.6"

"151605""Keppra XR 750 MG Oral Tablet Extended Release 24 Hour""74988""Seizure Disorder""2""0.25"

"151605""Keppra XR 750 MG Oral Tablet Extended Release 24 Hour""75002""Partial Complex Psychomotor Seizure With Intractable Seizure""7""0.777778"

"151605""Keppra XR 750 MG Oral Tablet Extended Release 24 Hour""252566""Partial Complex Seizure""3""0.75"

"151605""Keppra XR 750 MG Oral Tablet Extended Release 24 Hour""252570""Partial Complex Seizure With Secondary Generalization With Intractable Seizure""2""0.666667"

"151606""Topiramate 100 MG Oral Tablet""61040""Convulsions""2""0.4"

"151606""Topiramate 100 MG Oral Tablet""74533""Migraine Headache""13""0.419355"

"151606""Topiramate 100 MG Oral Tablet""74537""Common Migraine (Without Aura)""6""0.428571"

"151606""Topiramate 100 MG Oral Tablet""74538""Common Migraine (Without Aura) With Intractable Migraine""2""0.5"

"151606""Topiramate 100 MG Oral Tablet""74988""Seizure Disorder""17""0.354167"

"151606""Topiramate 100 MG Oral Tablet""74990""Convulsive Grand Mal Seizure With Intractable

Seizure"|"2"|"0.5"  
"151606"|"Topiramate 100 MG Oral Tablet"|"75002"|"Partial Complex Psychomotor Seizure With Intractable Seizure"|"11"|"0.578947"  
"151606"|"Topiramate 100 MG Oral Tablet"|"75104"|"Familial (Benign Essential) Tremor"|"3"|"0.6"  
"151606"|"Topiramate 100 MG Oral Tablet"|"76348"|"Bipolar II Disorder"|"2"|"0.666667"  
"151606"|"Topiramate 100 MG Oral Tablet"|"76388"|"Bipolar Disorder NOS"|"5"|"0.625"  
"151606"|"Topiramate 100 MG Oral Tablet"|"252546"|"Generalized Convulsive Seizure"|"7"|"0.583333"  
"151606"|"Topiramate 100 MG Oral Tablet"|"252550"|"Generalized Convulsive Tonic Seizure With Intractable Seizure"|"2"|"1"  
"151606"|"Topiramate 100 MG Oral Tablet"|"252551"|"Generalized Convulsive Tonic-clonic Seizure"|"4"|"0.8"  
"151606"|"Topiramate 100 MG Oral Tablet"|"252561"|"Motor Partial Seizure With Intractable Seizure"|"2"|"0.666667"  
"151606"|"Topiramate 100 MG Oral Tablet"|"252566"|"Partial Complex Seizure"|"4"|"0.5"  
"151606"|"Topiramate 100 MG Oral Tablet"|"252569"|"Partial Complex Seizure With Secondary Generalization"|"2"|"0.285714"  
"151606"|"Topiramate 100 MG Oral Tablet"|"252570"|"Partial Complex Seizure With Secondary Generalization With Intractable Seizure"|"8"|"0.8"  
"151606"|"Topiramate 100 MG Oral Tablet"|"297231"|"Epilepsy"|"3"|"0.428571"  
"151608"|"Afinitor 5 MG Oral Tablet"|"80847"|"Renal Cell Carcinoma"|"4"|"0.666667"  
"151608"|"Afinitor 5 MG Oral Tablet"|"181372"|"Renal Carcinoma"|"3"|"0.75"  
"151613"|"Topiramate 200 MG Oral Tablet"|"75002"|"Partial Complex Psychomotor Seizure With Intractable Seizure"|"4"|"0.8"  
"151613"|"Topiramate 200 MG Oral Tablet"|"252552"|"Generalized Convulsive Tonic-clonic Seizure With Intractable Seizure"|"2"|"0.666667"  
"151613"|"Topiramate 200 MG Oral Tablet"|"252561"|"Motor Partial Seizure With Intractable Seizure"|"2"|"1"  
"151619"|"Topiramate 25 MG Oral Tablet"|"60828"|"Headache"|"24"|"0.428571"  
"151619"|"Topiramate 25 MG Oral Tablet"|"61040"|"Convulsions"|"2"|"0.25"  
"151619"|"Topiramate 25 MG Oral Tablet"|"74529"|"Headache Syndromes"|"12"|"0.266667"  
"151619"|"Topiramate 25 MG Oral Tablet"|"74533"|"Migraine Headache"|"42"|"0.283784"  
"151619"|"Topiramate 25 MG Oral Tablet"|"74534"|"Classic Migraine (With Aura)"|"15"|"0.576923"  
"151619"|"Topiramate 25 MG Oral Tablet"|"74535"|"Classic Migraine (With Aura) With Intractable Migraine"|"3"|"0.5"  
"151619"|"Topiramate 25 MG Oral Tablet"|"74537"|"Common Migraine (Without Aura)"|"22"|"0.611111"  
"151619"|"Topiramate 25 MG Oral Tablet"|"74538"|"Common Migraine (Without Aura) With Intractable Migraine"|"7"|"0.777778"  
"151619"|"Topiramate 25 MG Oral Tablet"|"74540"|"Basilar Migraine Headache"|"4"|"0.5"  
"151619"|"Topiramate 25 MG Oral Tablet"|"74551"|"Non-migrainous Vascular Headache"|"6"|"0.4"  
"151619"|"Topiramate 25 MG Oral Tablet"|"74988"|"Seizure Disorder"|"13"|"0.168831"  
"151619"|"Topiramate 25 MG Oral Tablet"|"75001"|"Partial Complex Psychomotor Seizure"|"4"|"0.666667"  
"151619"|"Topiramate 25 MG Oral Tablet"|"75002"|"Partial Complex Psychomotor Seizure With Intractable Seizure"|"7"|"0.466667"  
"151619"|"Topiramate 25 MG Oral Tablet"|"75104"|"Familial (Benign Essential) Tremor"|"14"|"0.736842"  
"151619"|"Topiramate 25 MG Oral Tablet"|"75443"|"Arnold-Chiari Malformation"|"2"|"0.5"  
"151619"|"Topiramate 25 MG Oral Tablet"|"76272"|"Schizoaffective Disorder"|"3"|"0.6"  
"151619"|"Topiramate 25 MG Oral Tablet"|"76351"|"Depression"|"5"|"0.1"  
"151619"|"Topiramate 25 MG Oral Tablet"|"76388"|"Bipolar Disorder NOS"|"4"|"0.666667"  
"151619"|"Topiramate 25 MG Oral Tablet"|"76587"|"Anxiety Disorder NOS"|"2"|"0.2"  
"151619"|"Topiramate 25 MG Oral Tablet"|"163664"|"Mood Irritable"|"2"|"1"  
"151619"|"Topiramate 25 MG Oral Tablet"|"173442"|"Lumbar Radiculopathy"|"2"|"0.4"  
"151619"|"Topiramate 25 MG Oral Tablet"|"252550"|"Generalized Convulsive Tonic Seizure With Intractable Seizure"|"2"|"0.666667"  
"151619"|"Topiramate 25 MG Oral Tablet"|"252566"|"Partial Complex Seizure"|"3"|"0.428571"  
"151619"|"Topiramate 25 MG Oral Tablet"|"252569"|"Partial Complex Seizure With Secondary Generalization"|"2"|"0.4"  
"151619"|"Topiramate 25 MG Oral Tablet"|"252571"|"Partial Complex Seizure With Memory Disturbances"|"2"|"1"

"151619"|"Topiramate 25 MG Oral Tablet"|"275592"|"Post-traumatic Stress Disorder"|"3"|"0.5"  
"151619"|"Topiramate 25 MG Oral Tablet"|"283296"|"Abnormal Weight Gain"|"5"|"0.5"  
"151619"|"Topiramate 25 MG Oral Tablet"|"293498"|"Chronic Common Migraine (Without Aura)"|"6"|"0.857143"  
"151619"|"Topiramate 25 MG Oral Tablet"|"297231"|"Epilepsy"|"3"|"0.3"  
"151620"|"Topiramate 50 MG Oral Tablet"|"60828"|"Headache"|"4"|"0.181818"  
"151620"|"Topiramate 50 MG Oral Tablet"|"68106"|"Morbid Obesity"|"2"|"0.333333"  
"151620"|"Topiramate 50 MG Oral Tablet"|"74529"|"Headache Syndromes"|"4"|"0.148148"  
"151620"|"Topiramate 50 MG Oral Tablet"|"74530"|"Tension-type Headache"|"2"|"0.25"  
"151620"|"Topiramate 50 MG Oral Tablet"|"74533"|"Migraine Headache"|"24"|"0.375"  
"151620"|"Topiramate 50 MG Oral Tablet"|"74534"|"Classic Migraine (With Aura)"|"11"|"0.578947"  
"151620"|"Topiramate 50 MG Oral Tablet"|"74535"|"Classic Migraine (With Aura) With Intractable Migraine"|"2"|"1"  
"151620"|"Topiramate 50 MG Oral Tablet"|"74537"|"Common Migraine (Without Aura)"|"9"|"0.6"  
"151620"|"Topiramate 50 MG Oral Tablet"|"74545"|"Hemiplegic Migraine Headache"|"2"|"1"  
"151620"|"Topiramate 50 MG Oral Tablet"|"74551"|"Non-migrainous Vascular Headache"|"2"|"0.333333"  
"151620"|"Topiramate 50 MG Oral Tablet"|"74988"|"Seizure Disorder"|"10"|"0.25"  
"151620"|"Topiramate 50 MG Oral Tablet"|"75001"|"Partial Complex Psychomotor Seizure"|"2"|"0.4"  
"151620"|"Topiramate 50 MG Oral Tablet"|"75002"|"Partial Complex Psychomotor Seizure With Intractable Seizure"|"5"|"0.555556"  
"151620"|"Topiramate 50 MG Oral Tablet"|"75104"|"Familial (Benign Essential) Tremor"|"9"|"0.75"  
"151620"|"Topiramate 50 MG Oral Tablet"|"76306"|"Episodic Mood Disorders"|"2"|"1"  
"151620"|"Topiramate 50 MG Oral Tablet"|"76388"|"Bipolar Disorder NOS"|"4"|"0.5"  
"151620"|"Topiramate 50 MG Oral Tablet"|"252566"|"Partial Complex Seizure"|"3"|"0.428571"  
"151620"|"Topiramate 50 MG Oral Tablet"|"252569"|"Partial Complex Seizure With Secondary Generalization"|"2"|"0.4"  
"151620"|"Topiramate 50 MG Oral Tablet"|"275592"|"Post-traumatic Stress Disorder"|"3"|"0.75"  
"151620"|"Topiramate 50 MG Oral Tablet"|"293498"|"Chronic Common Migraine (Without Aura)"|"2"|"0.5"  
"151620"|"Topiramate 50 MG Oral Tablet"|"293515"|"Chronic Common Migraine (Without Aura) With Intractable Migraine"|"2"|"1"  
"151630"|"Afinitor 10 MG Oral Tablet"|"80847"|"Renal Cell Carcinoma"|"4"|"0.571429"  
"151630"|"Afinitor 10 MG Oral Tablet"|"181372"|"Renal Carcinoma"|"2"|"1"  
"151630"|"Afinitor 10 MG Oral Tablet"|"260898"|"Kidney Cancer"|"2"|"0.5"  
"151703"|"Benadryl Allergy Childrens 12.5 MG Oral Tablet Chewable"|"278350"|"Eczema"|"2"|"0.5"  
"151778"|"PrednisoLONE 15 MG/5ML Oral Solution"|"62598"|"Allergic Rhinitis"|"5"|"0.277778"  
"151778"|"PrednisoLONE 15 MG/5ML Oral Solution"|"64180"|"Reactive Airway Disease"|"3"|"0.3"  
"151778"|"PrednisoLONE 15 MG/5ML Oral Solution"|"64181"|"Asthma"|"8"|"0.333333"  
"151778"|"PrednisoLONE 15 MG/5ML Oral Solution"|"65674"|"Nephrotic Syndrome"|"3"|"1"  
"151778"|"PrednisoLONE 15 MG/5ML Oral Solution"|"65675"|"Nephrotic Syndrome Due To Minimal Change Glomerulonephritis"|"2"|"0.666667"  
"151778"|"PrednisoLONE 15 MG/5ML Oral Solution"|"69464"|"Congenital Adrenal Hyperplasia"|"2"|"0.666667"  
"151957"|"Topiramate 15 MG Oral Capsule Sprinkle"|"74988"|"Seizure Disorder"|"4"|"0.571429"  
"151957"|"Topiramate 15 MG Oral Capsule Sprinkle"|"297231"|"Epilepsy"|"2"|"0.5"  
"151958"|"Topiramate 25 MG Oral Capsule Sprinkle"|"74988"|"Seizure Disorder"|"4"|"0.666667"  
"151985"|"Savella Titration Pack 12.5 & 25 & 50 MG Oral Miscellaneous"|"288977"|"Fibromyalgia"|"2"|"1"  
"152018"|"Savella 50 MG Oral Tablet"|"288977"|"Fibromyalgia"|"14"|"0.636364"  
"152026"|"Savella 25 MG Oral Tablet"|"288977"|"Fibromyalgia"|"6"|"1"  
"152092"|"Simponi 50 MG/0.5ML Subcutaneous Solution"|"70455"|"Rheumatoid Arthritis"|"11"|"0.733333"  
"152092"|"Simponi 50 MG/0.5ML Subcutaneous Solution"|"70480"|"Arthritis Of Inflammatory Bowel Disease"|"2"|"1"  
"152092"|"Simponi 50 MG/0.5ML Subcutaneous Solution"|"70706"|"Ankylosing Spondylitis"|"15"|"0.9375"  
"152092"|"Simponi 50 MG/0.5ML Subcutaneous Solution"|"70719"|"Psoriatic Arthropathy"|"4"|"0.8"  
"152094"|"Requip XL 6 MG Oral Tablet Extended Release 24 Hour"|"75054"|"Restless Legs Syndrome"|"3"|"0.75"  
"152094"|"Requip XL 6 MG Oral Tablet Extended Release 24 Hour"|"75080"|"Parkinson's Disease"|"4"|"0.444444"  
"152095"|"Nuvigil 150 MG Oral Tablet"|"75124"|"Demyelinating Disorders"|"3"|"0.5"  
"152095"|"Nuvigil 150 MG Oral Tablet"|"75125"|"Multiple Sclerosis"|"16"|"0.551724"  
"152095"|"Nuvigil 150 MG Oral Tablet"|"75813"|"Chronic Fatigue Syndrome"|"2"|"0.285714"

"152095"|"Nuvigil 150 MG Oral Tablet"|"76408"|"Adult Sleep Apnea"|"2"|"0.5"  
"152095"|"Nuvigil 150 MG Oral Tablet"|"76409"|"Narcolepsy"|"5"|"1"  
"152095"|"Nuvigil 150 MG Oral Tablet"|"173466"|"Obstructive Sleep Apnea"|"4"|"0.307692"  
"152095"|"Nuvigil 150 MG Oral Tablet"|"275545"|"Organic Hypersomnia"|"3"|"1"  
"152122"|"Nuvigil 250 MG Oral Tablet"|"75080"|"Parkinson's Disease"|"2"|"0.666667"  
"152122"|"Nuvigil 250 MG Oral Tablet"|"76409"|"Narcolepsy"|"3"|"0.6"  
"152122"|"Nuvigil 250 MG Oral Tablet"|"173466"|"Obstructive Sleep Apnea"|"3"|"0.375"  
"152122"|"Nuvigil 250 MG Oral Tablet"|"275545"|"Organic Hypersomnia"|"2"|"1"  
"152122"|"Nuvigil 250 MG Oral Tablet"|"275608"|"Idiopathic Organic Hypersomnia"|"2"|"1"  
"152159"|"Ketorolac Tromethamine 60 MG/2ML Intramuscular Solution"|"75811"|"Muscle Spasm"|"2"|"0.666667"  
"152224"|"Mycophenolate Mofetil 250 MG Oral Capsule"|"70475"|"Scleroderma"|"3"|"0.75"  
"152224"|"Mycophenolate Mofetil 250 MG Oral Capsule"|"288804"|"Encephalitis"|"2"|"1"  
"152225"|"CarBAMazepine 200 MG Oral Tablet Extended Release 12 Hour"|"74988"|"Seizure Disorder"|"4"|"0.5"  
"152225"|"CarBAMazepine 200 MG Oral Tablet Extended Release 12 Hour"|"75002"|"Partial Complex Psychomotor Seizure With Intractable Seizure"|"3"|"0.75"  
"152225"|"CarBAMazepine 200 MG Oral Tablet Extended Release 12 Hour"|"252547"|"Generalized Convulsive Clonic Seizure"|"2"|"1"  
"152225"|"CarBAMazepine 200 MG Oral Tablet Extended Release 12 Hour"|"252566"|"Partial Complex Seizure"|"5"|"1"  
"152251"|"Mycophenolate Mofetil 500 MG Oral Tablet"|"34588"|"Proteinuria"|"4"|"0.166667"  
"152251"|"Mycophenolate Mofetil 500 MG Oral Tablet"|"65674"|"Nephrotic Syndrome"|"4"|"0.571429"  
"152251"|"Mycophenolate Mofetil 500 MG Oral Tablet"|"65675"|"Nephrotic Syndrome Due To Minimal Change Glomerulonephritis"|"3"|"1"  
"152251"|"Mycophenolate Mofetil 500 MG Oral Tablet"|"70472"|"Systemic Lupus Erythematosus"|"40"|"0.754717"  
"152251"|"Mycophenolate Mofetil 500 MG Oral Tablet"|"70475"|"Scleroderma"|"11"|"0.733333"  
"152251"|"Mycophenolate Mofetil 500 MG Oral Tablet"|"70477"|"Scleroderma With Pulmonary Involvement"|"3"|"0.75"  
"152251"|"Mycophenolate Mofetil 500 MG Oral Tablet"|"70478"|"Sjogren's Syndrome"|"2"|"0.333333"  
"152251"|"Mycophenolate Mofetil 500 MG Oral Tablet"|"70598"|"Polymyositis / Dermatomyositis"|"5"|"1"  
"152251"|"Mycophenolate Mofetil 500 MG Oral Tablet"|"70599"|"Typical Polymyositis (Type I)"|"2"|"1"  
"152251"|"Mycophenolate Mofetil 500 MG Oral Tablet"|"70640"|"Wegener's Granulomatosis"|"4"|"1"  
"152251"|"Mycophenolate Mofetil 500 MG Oral Tablet"|"75127"|"Devic Disease"|"3"|"0.75"  
"152251"|"Mycophenolate Mofetil 500 MG Oral Tablet"|"274606"|"Chronic Kidney Disease, Stage 3"|"3"|"0.75"  
"152251"|"Mycophenolate Mofetil 500 MG Oral Tablet"|"274611"|"Nephritis Due To SLE"|"6"|"0.375"  
"152251"|"Mycophenolate Mofetil 500 MG Oral Tablet"|"277913"|"Chronic Interstitial Lung Disease"|"3"|"0.6"  
"152259"|"Concept DHA 53.5-38-1 MG Oral Capsule"|"65762"|"Urinary Tract Infection"|"2"|"0.2"  
"152260"|"CarBAMazepine 400 MG Oral Tablet Extended Release 12 Hour"|"252566"|"Partial Complex Seizure"|"4"|"0.8"  
"152260"|"CarBAMazepine 400 MG Oral Tablet Extended Release 12 Hour"|"252569"|"Partial Complex Seizure With Secondary Generalization"|"3"|"1"  
"152262"|"Integra F 125-1 MG Oral Capsule"|"77962"|"Anemia"|"2"|"0.5"  
"152262"|"Integra F 125-1 MG Oral Capsule"|"77968"|"Iron Deficiency"|"2"|"1"  
"152266"|"Integra Plus Oral Capsule"|"77962"|"Anemia"|"3"|"0.428571"  
"152266"|"Integra Plus Oral Capsule"|"278753"|"Anemia Of Chronic Kidney Disease"|"2"|"0.666667"  
"152271"|"Integra 62.5-62.5-40-3 MG Oral Capsule"|"77968"|"Iron Deficiency"|"4"|"0.666667"  
"152271"|"Integra 62.5-62.5-40-3 MG Oral Capsule"|"278753"|"Anemia Of Chronic Kidney Disease"|"2"|"0.333333"  
"152348"|"Exforge HCT 10-320-25 MG Oral Tablet"|"63467"|"Hypertension"|"2"|"0.5"  
"152348"|"Exforge HCT 10-320-25 MG Oral Tablet"|"63470"|"Benign Essential Hypertension"|"2"|"1"  
"152371"|"LaMICtal ODT 100 MG Oral Tablet Dispersible"|"297231"|"Epilepsy"|"2"|"0.666667"  
"152383"|"Asacol HD 800 MG Oral Tablet Delayed Release"|"65041"|"Ulcerative Colitis"|"2"|"0.666667"  
"152386"|"LaMICtal ODT 25 MG Oral Tablet Dispersible"|"74988"|"Seizure Disorder"|"3"|"0.428571"  
"152386"|"LaMICtal ODT 25 MG Oral Tablet Dispersible"|"297231"|"Epilepsy"|"3"|"0.75"  
"152401"|"Malathion 0.5 % External Lotion"|"77808"|"Pediculosis Capitis"|"4"|"0.8"  
"152404"|"LaMICtal ODT 50 MG Oral Tablet Dispersible"|"74988"|"Seizure Disorder"|"3"|"0.6"

"152412"|"Cimzia 2 X 200 MG/ML Subcutaneous Kit"|"70455"|"Rheumatoid Arthritis"|"4"|"1"  
"152429"|"Ursodiol 500 MG Oral Tablet"|"65292"|"Primary Biliary Cirrhosis"|"2"|"0.5"  
"152429"|"Ursodiol 500 MG Oral Tablet"|"70475"|"Scleroderma"|"2"|"0.5"  
"152505"|"Corvita 150 150-1.25 MG Oral Tablet"|"77962"|"Anemia"|"5"|"1"  
"152515"|"OB Complete 400 35-5-1.2 MG CAPS"|"274406"|"Pregnancy Test Positive"|"2"|"0.666667"  
"152595"|"Lancets Ultra Thin Miscellaneous"|"69380"|"Diabetes Mellitus"|"4"|"0.5"  
"152595"|"Lancets Ultra Thin Miscellaneous"|"69388"|"Type I Diabetes Mellitus - Uncontrolled"|"2"|"1"  
"152644"|"LaMICtal XR 50 MG Oral Tablet Extended Release 24 Hour"|"74988"|"Seizure Disorder"|"3"|"0.428571"  
"152644"|"LaMICtal XR 50 MG Oral Tablet Extended Release 24 Hour"|"75002"|"Partial Complex Psychomotor Seizure With Intractable Seizure"|"2"|"0.666667"  
"152650"|"LaMICtal XR 100 MG Oral Tablet Extended Release 24 Hour"|"74988"|"Seizure Disorder"|"5"|"0.227273"  
"152650"|"LaMICtal XR 100 MG Oral Tablet Extended Release 24 Hour"|"75001"|"Partial Complex Psychomotor Seizure"|"3"|"1"  
"152650"|"LaMICtal XR 100 MG Oral Tablet Extended Release 24 Hour"|"75002"|"Partial Complex Psychomotor Seizure With Intractable Seizure"|"7"|"0.7"  
"152650"|"LaMICtal XR 100 MG Oral Tablet Extended Release 24 Hour"|"252569"|"Partial Complex Seizure With Secondary Generalization"|"2"|"1"  
"152650"|"LaMICtal XR 100 MG Oral Tablet Extended Release 24 Hour"|"252570"|"Partial Complex Seizure With Secondary Generalization With Intractable Seizure"|"3"|"0.6"  
"152650"|"LaMICtal XR 100 MG Oral Tablet Extended Release 24 Hour"|"289878"|"Generalized Convulsive Myoclonic Seizure, Juvenile"|"2"|"1"  
"152650"|"LaMICtal XR 100 MG Oral Tablet Extended Release 24 Hour"|"297231"|"Epilepsy"|"3"|"0.75"  
"152658"|"LaMICtal XR 200 MG Oral Tablet Extended Release 24 Hour"|"74988"|"Seizure Disorder"|"6"|"0.352941"  
"152658"|"LaMICtal XR 200 MG Oral Tablet Extended Release 24 Hour"|"74989"|"Generalized Convulsive Grand Mal Seizure"|"2"|"1"  
"152658"|"LaMICtal XR 200 MG Oral Tablet Extended Release 24 Hour"|"75001"|"Partial Complex Psychomotor Seizure"|"2"|"1"  
"152658"|"LaMICtal XR 200 MG Oral Tablet Extended Release 24 Hour"|"75002"|"Partial Complex Psychomotor Seizure With Intractable Seizure"|"11"|"0.846154"  
"152658"|"LaMICtal XR 200 MG Oral Tablet Extended Release 24 Hour"|"252566"|"Partial Complex Seizure"|"3"|"0.75"  
"152658"|"LaMICtal XR 200 MG Oral Tablet Extended Release 24 Hour"|"252570"|"Partial Complex Seizure With Secondary Generalization With Intractable Seizure"|"2"|"0.5"  
"152658"|"LaMICtal XR 200 MG Oral Tablet Extended Release 24 Hour"|"289878"|"Generalized Convulsive Myoclonic Seizure, Juvenile"|"3"|"0.75"  
"152663"|"Cetraxal 0.2 % Otic Solution"|"62322"|"Otitis Externa"|"2"|"1"  
"152816"|"Cepacol Sore Throat Max Numb 15-4 MG Mouth/Throat Lozenge"|"62760"|"Acute Pharyngitis"|"2"|"1"  
"152817"|"Creon 24000 UNIT Oral Capsule Delayed Release Particles"|"67695"|"Cystic Fibrosis"|"4"|"0.8"  
"152836"|"Creon 12000 UNIT Oral Capsule Delayed Release Particles"|"64935"|"Malabsorption Syndrome"|"2"|"0.666667"  
"152836"|"Creon 12000 UNIT Oral Capsule Delayed Release Particles"|"65360"|"Pancreatic Insufficiency"|"2"|"0.666667"  
"152836"|"Creon 12000 UNIT Oral Capsule Delayed Release Particles"|"67695"|"Cystic Fibrosis"|"4"|"0.8"  
"152836"|"Creon 12000 UNIT Oral Capsule Delayed Release Particles"|"79017"|"Hepatocellular Carcinoma Of The Liver"|"2"|"0.666667"  
"152836"|"Creon 12000 UNIT Oral Capsule Delayed Release Particles"|"79148"|"Malignant Pancreatic Neoplasm"|"2"|"1"  
"152864"|"Creon 6000 UNIT Oral Capsule Delayed Release Particles"|"67695"|"Cystic Fibrosis"|"2"|"1"  
"152864"|"Creon 6000 UNIT Oral Capsule Delayed Release Particles"|"76442"|"Failure To Thrive In Childhood"|"2"|"1"  
"152864"|"Creon 6000 UNIT Oral Capsule Delayed Release Particles"|"79148"|"Malignant Pancreatic Neoplasm"|"2"|"1"  
"153071"|"Ergocalciferol 8000 UNIT/ML Oral Solution"|"64935"|"Malabsorption Syndrome"|"2"|"1"  
"153071"|"Ergocalciferol 8000 UNIT/ML Oral Solution"|"68058"|"Vitamin D Deficiency"|"3"|"0.75"

"153075"|"Benzoyl Peroxide Wash 7 % External Liquid"|"69606"|"Acne"|"2"|"1"  
"153077"|"Adcirca 20 MG Oral Tablet"|"63484"|"Pulmonary Hypertension"|"9"|"0.75"  
"153077"|"Adcirca 20 MG Oral Tablet"|"64205"|"Chronic Obstructive Pulmonary Disease"|"2"|"0.4"  
"153077"|"Adcirca 20 MG Oral Tablet"|"70475"|"Scleroderma"|"2"|"0.5"  
"153126"|"Multaq 400 MG Oral Tablet"|"62902"|"Supraventricular Tachycardia"|"2"|"0.666667"  
"153126"|"Multaq 400 MG Oral Tablet"|"62916"|"Atrial Fibrillation"|"16"|"0.372093"  
"153132"|"Bicalutamide 50 MG Oral Tablet"|"80830"|"Malignant Neoplasm Of The Prostate Gland"|"5"|"0.833333"  
"153132"|"Bicalutamide 50 MG Oral Tablet"|"80831"|"Adenocarcinoma Of The Prostate Gland"|"5"|"0.625"  
"153132"|"Bicalutamide 50 MG Oral Tablet"|"278812"|"Prostate Cancer"|"32"|"0.727273"  
"153133"|"PEG-3350/Electrolytes 236 GM Oral Solution Reconstituted"|"65123"|"Rectal Hemorrhage"|"2"|"1"  
"153161"|"Effient 10 MG Oral Tablet"|"62975"|"Coronary Artery Disease"|"9"|"0.391304"  
"153168"|"Hectorol 1 MCG Oral Capsule"|"68058"|"Vitamin D Deficiency"|"5"|"0.384615"  
"153168"|"Hectorol 1 MCG Oral Capsule"|"258937"|"Renal Secondary Hyperparathyroidism"|"6"|"0.545455"  
"153205"|"Bayer Breeze 2 Test In Vitro Disk"|"69380"|"Diabetes Mellitus"|"3"|"0.375"  
"153205"|"Bayer Breeze 2 Test In Vitro Disk"|"69381"|"Type II Diabetes Mellitus"|"2"|"0.666667"  
"153205"|"Bayer Breeze 2 Test In Vitro Disk"|"69402"|"Diabetes Mellitus Poorly Controlled"|"3"|"0.75"  
"153209"|"Bayer Contour Test In Vitro Strip"|"69380"|"Diabetes Mellitus"|"13"|"0.152941"  
"153209"|"Bayer Contour Test In Vitro Strip"|"69381"|"Type II Diabetes Mellitus"|"15"|"0.333333"  
"153209"|"Bayer Contour Test In Vitro Strip"|"69382"|"Type II Diabetes Mellitus - Uncomplicated, Uncontrolled"|"4"|"0.307692"  
"153209"|"Bayer Contour Test In Vitro Strip"|"69387"|"Type I Diabetes Mellitus"|"5"|"0.555556"  
"153209"|"Bayer Contour Test In Vitro Strip"|"69388"|"Type I Diabetes Mellitus - Uncontrolled"|"11"|"0.733333"  
"153209"|"Bayer Contour Test In Vitro Strip"|"69402"|"Diabetes Mellitus Poorly Controlled"|"77"|"0.836957"  
"153223"|"GNP Loratadine 10 MG Oral Tablet"|"62598"|"Allergic Rhinitis"|"2"|"1"  
"153392"|"Onglyza 2.5 MG Oral Tablet"|"69380"|"Diabetes Mellitus"|"2"|"0.285714"  
"153392"|"Onglyza 2.5 MG Oral Tablet"|"69381"|"Type II Diabetes Mellitus"|"4"|"0.666667"  
"153415"|"Onglyza 5 MG Oral Tablet"|"69380"|"Diabetes Mellitus"|"5"|"0.178571"  
"153415"|"Onglyza 5 MG Oral Tablet"|"69381"|"Type II Diabetes Mellitus"|"12"|"0.6"  
"153415"|"Onglyza 5 MG Oral Tablet"|"69402"|"Diabetes Mellitus Poorly Controlled"|"9"|"0.642857"  
"153459"|"Amoxicillin-Pot Clavulanate 250-62.5 MG/5ML Oral Suspension Reconstituted"|"62343"|"Otitis Media"|"2"|"0.2"  
"153459"|"Amoxicillin-Pot Clavulanate 250-62.5 MG/5ML Oral Suspension Reconstituted"|"62577"|"Sinusitis"|"3"|"0.75"  
"153459"|"Amoxicillin-Pot Clavulanate 250-62.5 MG/5ML Oral Suspension Reconstituted"|"62578"|"Acute Sinusitis"|"4"|"0.666667"  
"153459"|"Amoxicillin-Pot Clavulanate 250-62.5 MG/5ML Oral Suspension Reconstituted"|"62760"|"Acute Pharyngitis"|"2"|"0.5"  
"153459"|"Amoxicillin-Pot Clavulanate 250-62.5 MG/5ML Oral Suspension Reconstituted"|"64934"|"Small Bowel Bacterial Overgrowth"|"2"|"1"  
"153459"|"Amoxicillin-Pot Clavulanate 250-62.5 MG/5ML Oral Suspension Reconstituted"|"251528"|"Acute Otitis Media"|"16"|"0.761905"  
"153459"|"Amoxicillin-Pot Clavulanate 250-62.5 MG/5ML Oral Suspension Reconstituted"|"257912"|"Disorder Of Mitochondrial Metabolism"|"2"|"0.5"  
"153459"|"Amoxicillin-Pot Clavulanate 250-62.5 MG/5ML Oral Suspension Reconstituted"|"282676"|"Lymphadenopathy"|"3"|"0.75"  
"153592"|"Colcrys 0.6 MG Oral Tablet"|"70384"|"Gout"|"28"|"0.666667"  
"153592"|"Colcrys 0.6 MG Oral Tablet"|"70386"|"Acute Gout"|"12"|"0.666667"  
"153592"|"Colcrys 0.6 MG Oral Tablet"|"70387"|"Chronic Gout"|"19"|"0.863636"  
"153592"|"Colcrys 0.6 MG Oral Tablet"|"70388"|"Chronic Tophaceous Gout"|"2"|"0.666667"  
"153592"|"Colcrys 0.6 MG Oral Tablet"|"70406"|"Pseudogout"|"2"|"0.666667"  
"153592"|"Colcrys 0.6 MG Oral Tablet"|"70475"|"Scleroderma"|"2"|"1"  
"153592"|"Colcrys 0.6 MG Oral Tablet"|"70648"|"Behcet's Syndrome"|"3"|"1"  
"153592"|"Colcrys 0.6 MG Oral Tablet"|"298473"|"Acute Gouty Arthropathy"|"2"|"1"  
"153655"|"Ventavis 20 MCG/ML Inhalation Solution"|"63484"|"Pulmonary Hypertension"|"2"|"0.666667"

"153655"|"Ventavis 20 MCG/ML Inhalation Solution"|"63488"|"Secondary Pulmonary Hypertension"|"2"|"1"  
"153656"|"Clindamycin Phos-Benzoyl Perox 1-5 % External Gel"|"69606"|"Acne"|"49"|"0.803279"  
"153656"|"Clindamycin Phos-Benzoyl Perox 1-5 % External Gel"|"69607"|"Acne Vulgaris"|"5"|"0.714286"  
"153753"|"Astepro 0.15 % Nasal Solution"|"62578"|"Acute Sinusitis"|"4"|"0.307692"  
"153753"|"Astepro 0.15 % Nasal Solution"|"62598"|"Allergic Rhinitis"|"15"|"0.454545"  
"153753"|"Astepro 0.15 % Nasal Solution"|"62611"|"Chronic Rhinitis"|"3"|"0.428571"  
"153759"|"Nateglinide 120 MG Oral Tablet"|"69380"|"Diabetes Mellitus"|"4"|"0.4"  
"153759"|"Nateglinide 120 MG Oral Tablet"|"69381"|"Type II Diabetes Mellitus"|"2"|"0.5"  
"153759"|"Nateglinide 120 MG Oral Tablet"|"69402"|"Diabetes Mellitus Poorly Controlled"|"2"|"0.4"  
"153772"|"Imodium A-D 2 MG Oral Tablet Chewable"|"166767"|"Infectious Diarrhea"|"2"|"0.666667"  
"153777"|"Nateglinide 60 MG Oral Tablet"|"69380"|"Diabetes Mellitus"|"6"|"0.545455"  
"153777"|"Nateglinide 60 MG Oral Tablet"|"69402"|"Diabetes Mellitus Poorly Controlled"|"4"|"0.666667"  
"153813"|"Valturna 150-160 MG Oral Tablet"|"63467"|"Hypertension"|"3"|"0.3"  
"153814"|"Valturna 300-320 MG Oral Tablet"|"63467"|"Hypertension"|"3"|"0.25"  
"153820"|"Tyvaso Refill 0.6 MG/ML Inhalation Solution"|"63484"|"Pulmonary Hypertension"|"2"|"1"  
"153842"|"Chantix Starting Month Pak 0.5 MG X 11 & 1 MG X 42 Oral Tablet"|"64205"|"Chronic Obstructive Pulmonary Disease"|"3"|"0.1875"  
"153842"|"Chantix Starting Month Pak 0.5 MG X 11 & 1 MG X 42 Oral Tablet"|"76090"|"Nicotine Dependence"|"30"|"0.666667"  
"153842"|"Chantix Starting Month Pak 0.5 MG X 11 & 1 MG X 42 Oral Tablet"|"76091"|"Nicotine Dependence - Continuous"|"2"|"0.4"  
"153842"|"Chantix Starting Month Pak 0.5 MG X 11 & 1 MG X 42 Oral Tablet"|"85752"|"Tobacco Use"|"7"|"0.104478"  
"153842"|"Chantix Starting Month Pak 0.5 MG X 11 & 1 MG X 42 Oral Tablet"|"291647"|"Intervention And Counseling On Cessation Of Tobacco Use"|"10"|"0.714286"  
"153844"|"LamoTRiGINE 25 (42)-100 (7) MG KIT"|"76388"|"Bipolar Disorder NOS"|"2"|"1"  
"154020"|"Intuniv 4 MG Oral Tablet Extended Release 24 Hour"|"275486"|"ADHD, Combined Type"|"4"|"1"  
"154025"|"Intuniv 3 MG Oral Tablet Extended Release 24 Hour"|"75818"|"Attention-deficit Hyperactivity Disorder"|"5"|"0.384615"  
"154025"|"Intuniv 3 MG Oral Tablet Extended Release 24 Hour"|"275486"|"ADHD, Combined Type"|"10"|"0.833333"  
"154025"|"Intuniv 3 MG Oral Tablet Extended Release 24 Hour"|"275492"|"ADHD, Predominantly Hyperactive - Impulsive"|"2"|"0.666667"  
"154039"|"Intuniv 1 MG Oral Tablet Extended Release 24 Hour"|"75818"|"Attention-deficit Hyperactivity Disorder"|"4"|"0.363636"  
"154039"|"Intuniv 1 MG Oral Tablet Extended Release 24 Hour"|"75904"|"Atypical Pervasive Developmental Disorder"|"2"|"0.666667"  
"154039"|"Intuniv 1 MG Oral Tablet Extended Release 24 Hour"|"275486"|"ADHD, Combined Type"|"16"|"0.941176"  
"154039"|"Intuniv 1 MG Oral Tablet Extended Release 24 Hour"|"275492"|"ADHD, Predominantly Hyperactive - Impulsive"|"3"|"1"  
"154051"|"Intuniv 2 MG Oral Tablet Extended Release 24 Hour"|"75818"|"Attention-deficit Hyperactivity Disorder"|"3"|"0.1875"  
"154051"|"Intuniv 2 MG Oral Tablet Extended Release 24 Hour"|"275486"|"ADHD, Combined Type"|"10"|"0.769231"  
"154083"|"Embrace Blood Glucose Test In Vitro Strip"|"69380"|"Diabetes Mellitus"|"2"|"1"  
"154099"|"Brimonidine Tartrate 0.15 % Ophthalmic Solution"|"62066"|"Glaucoma"|"3"|"0.6"  
"154143"|"PEG 3350 Oral Packet"|"166777"|"Constipation"|"2"|"1"  
"154155"|"Zenpep 5000 UNIT Oral Capsule Delayed Release Particles"|"65360"|"Pancreatic Insufficiency"|"2"|"1"  
"154197"|"PEG 3350 Oral Powder"|"65055"|"Chronic Constipation"|"7"|"1"  
"154197"|"PEG 3350 Oral Powder"|"166777"|"Constipation"|"8"|"1"  
"154404"|"Amphetamine-Dextroamphetamine 5 MG Oral Tablet"|"75818"|"Attention-deficit Hyperactivity Disorder"|"4"|"0.8"  
"154404"|"Amphetamine-Dextroamphetamine 5 MG Oral Tablet"|"275486"|"ADHD, Combined Type"|"5"|"1"  
"154435"|"Amphetamine-Dextroamphetamine 20 MG Oral Tablet"|"61048"|"Memory Lapses Or Loss"|"2"|"1"  
"154435"|"Amphetamine-Dextroamphetamine 20 MG Oral Tablet"|"75818"|"Attention-deficit Hyperactivity Disorder"|"6"|"0.666667"

"154435"|"Amphetamine-Dextroamphetamine 20 MG Oral Tablet"|"75819"|"ADHD, Predominantly Inattentive Type"|"5"|"0.714286"  
"154435"|"Amphetamine-Dextroamphetamine 20 MG Oral Tablet"|"75820"|"ATTENTION-DEFICIT DISORDER WITH HYPERACTIVITY"|"3"|"1"  
"154435"|"Amphetamine-Dextroamphetamine 20 MG Oral Tablet"|"275486"|"ADHD, Combined Type"|"4"|"1"  
"154435"|"Amphetamine-Dextroamphetamine 20 MG Oral Tablet"|"291687"|"Attention Deficit Disorder Without Hyperactivity"|"3"|"1"  
"154456"|"Amphetamine-Dextroamphetamine 10 MG Oral Tablet"|"75125"|"Multiple Sclerosis"|"2"|"1"  
"154456"|"Amphetamine-Dextroamphetamine 10 MG Oral Tablet"|"75818"|"Attention-deficit Hyperactivity Disorder"|"3"|"0.5"  
"154456"|"Amphetamine-Dextroamphetamine 10 MG Oral Tablet"|"75819"|"ADHD, Predominantly Inattentive Type"|"5"|"0.833333"  
"154456"|"Amphetamine-Dextroamphetamine 10 MG Oral Tablet"|"275486"|"ADHD, Combined Type"|"3"|"0.75"  
"154465"|"Fexofenadine-Pseudoephedrine 60-120 MG TB12"|"62557"|"Eustachian Tube Block"|"2"|"0.5"  
"154465"|"Fexofenadine-Pseudoephedrine 60-120 MG TB12"|"62577"|"Sinusitis"|"2"|"0.666667"  
"154465"|"Fexofenadine-Pseudoephedrine 60-120 MG TB12"|"62578"|"Acute Sinusitis"|"19"|"0.76"  
"154465"|"Fexofenadine-Pseudoephedrine 60-120 MG TB12"|"62598"|"Allergic Rhinitis"|"30"|"0.714286"  
"154465"|"Fexofenadine-Pseudoephedrine 60-120 MG TB12"|"77890"|"Upper Respiratory Infection"|"2"|"0.25"  
"154465"|"Fexofenadine-Pseudoephedrine 60-120 MG TB12"|"77891"|"Acute Upper Respiratory Infection"|"8"|"0.444444"  
"154465"|"Fexofenadine-Pseudoephedrine 60-120 MG TB12"|"87028"|"Nasal Passage Blockage (Stuffiness)"|"3"|"1"  
"154489"|"Votrient 200 MG Oral Tablet"|"260898"|"Kidney Cancer"|"2"|"0.666667"  
"154640"|"ValACYclovir HCl 500 MG Oral Tablet"|"75765"|"Postherpetic Neuralgia"|"2"|"1"  
"154640"|"ValACYclovir HCl 500 MG Oral Tablet"|"76781"|"Herpes Simplex"|"63"|"0.828947"  
"154640"|"ValACYclovir HCl 500 MG Oral Tablet"|"76782"|"Herpes Simplex Type I"|"7"|"0.7"  
"154640"|"ValACYclovir HCl 500 MG Oral Tablet"|"76783"|"Herpes Simplex Type II"|"67"|"0.905405"  
"154640"|"ValACYclovir HCl 500 MG Oral Tablet"|"76786"|"Herpes Simplex Acute Gingivostomatitis"|"2"|"0.5"  
"154640"|"ValACYclovir HCl 500 MG Oral Tablet"|"76794"|"Herpes Zoster (Shingles)"|"12"|"0.923077"  
"154640"|"ValACYclovir HCl 500 MG Oral Tablet"|"76842"|"Acquired Immunodeficiency Syndrome (AIDS)"|"2"|"0.2"  
"154640"|"ValACYclovir HCl 500 MG Oral Tablet"|"94389"|"Exposed To Herpes Simplex"|"2"|"1"  
"154655"|"ValACYclovir HCl 1 GM Oral Tablet"|"66262"|"Herpetic Ulceration Of Vulva"|"2"|"0.666667"  
"154655"|"ValACYclovir HCl 1 GM Oral Tablet"|"75500"|"Bell's Palsy"|"3"|"1"  
"154655"|"ValACYclovir HCl 1 GM Oral Tablet"|"76781"|"Herpes Simplex"|"26"|"0.722222"  
"154655"|"ValACYclovir HCl 1 GM Oral Tablet"|"76782"|"Herpes Simplex Type I"|"23"|"0.851852"  
"154655"|"ValACYclovir HCl 1 GM Oral Tablet"|"76783"|"Herpes Simplex Type II"|"21"|"0.7"  
"154655"|"ValACYclovir HCl 1 GM Oral Tablet"|"76794"|"Herpes Zoster (Shingles)"|"32"|"0.820513"  
"154655"|"ValACYclovir HCl 1 GM Oral Tablet"|"76842"|"Acquired Immunodeficiency Syndrome (AIDS)"|"2"|"0.222222"  
"154656"|"Azelastine HCl 0.05 % Ophthalmic Solution"|"61417"|"Conjunctivitis"|"2"|"0.666667"  
"154656"|"Azelastine HCl 0.05 % Ophthalmic Solution"|"61421"|"Acute Vernal Conjunctivitis"|"2"|"1"  
"154656"|"Azelastine HCl 0.05 % Ophthalmic Solution"|"61423"|"Acute Atopic Conjunctivitis"|"7"|"1"  
"154656"|"Azelastine HCl 0.05 % Ophthalmic Solution"|"61433"|"Chronic Allergic Conjunctivitis"|"2"|"0.666667"  
"154656"|"Azelastine HCl 0.05 % Ophthalmic Solution"|"62598"|"Allergic Rhinitis"|"6"|"0.5"  
"154753"|"Ferrous Sulfate 75 (15 Fe) MG/ML Oral Solution"|"77962"|"Anemia"|"14"|"0.823529"  
"154753"|"Ferrous Sulfate 75 (15 Fe) MG/ML Oral Solution"|"77968"|"Iron Deficiency"|"4"|"0.666667"  
"154753"|"Ferrous Sulfate 75 (15 Fe) MG/ML Oral Solution"|"77970"|"Iron Deficiency Anemia Secondary To Inadequate Dietary Iron Intake"|"4"|"1"  
"154770"|"Vitamin D (Ergocalciferol) 50000 UNIT Oral Capsule"|"68058"|"Vitamin D Deficiency"|"271"|"0.790087"  
"154770"|"Vitamin D (Ergocalciferol) 50000 UNIT Oral Capsule"|"69339"|"Osteomalacia"|"2"|"0.5"  
"154770"|"Vitamin D (Ergocalciferol) 50000 UNIT Oral Capsule"|"69340"|"Osteopenia"|"5"|"0.131579"  
"154770"|"Vitamin D (Ergocalciferol) 50000 UNIT Oral Capsule"|"69341"|"Osteoporosis"|"8"|"0.153846"  
"154770"|"Vitamin D (Ergocalciferol) 50000 UNIT Oral Capsule"|"70455"|"Rheumatoid Arthritis"|"12"|"0.181818"  
"154770"|"Vitamin D (Ergocalciferol) 50000 UNIT Oral Capsule"|"70461"|"Juvenile Rheumatoid Arthritis"|"2"|"0.5"

"154770"|"Vitamin D (Ergocalciferol) 50000 UNIT Oral Capsule"|"70719"|"Psoriatic Arthropathy"|"2"|"0.4"  
"154770"|"Vitamin D (Ergocalciferol) 50000 UNIT Oral Capsule"|"251467"|"Limb Pain"|"3"|"0.125"  
"154770"|"Vitamin D (Ergocalciferol) 50000 UNIT Oral Capsule"|"257944"|"Vitamin Deficiency"|"4"|"0.571429"  
"154770"|"Vitamin D (Ergocalciferol) 50000 UNIT Oral Capsule"|"274606"|"Chronic Kidney Disease, Stage  
3"|"2"|"0.222222"  
"154802"|"LoSeasonique 0.1-0.02 & 0.01 MG Oral Tablet"|"66133"|"Dysmenorrhea"|"2"|"1"  
"154802"|"LoSeasonique 0.1-0.02 & 0.01 MG Oral Tablet"|"250989"|"Oral Contraceptives"|"2"|"1"  
"154807"|"Bystolic 20 MG Oral Tablet"|"62975"|"Coronary Artery Disease"|"2"|"0.25"  
"154807"|"Bystolic 20 MG Oral Tablet"|"63467"|"Hypertension"|"16"|"0.592593"  
"154807"|"Bystolic 20 MG Oral Tablet"|"63468"|"Essential Hypertension"|"6"|"0.461538"  
"154807"|"Bystolic 20 MG Oral Tablet"|"63470"|"Benign Essential Hypertension"|"6"|"0.5"  
"154809"|"Perindopril Erbumine 4 MG Oral Tablet"|"63468"|"Essential Hypertension"|"2"|"0.666667"  
"154811"|"CloNIDine HCl 0.1 MG/24HR Transdermal Patch Weekly"|"63467"|"Hypertension"|"2"|"0.2"  
"154811"|"CloNIDine HCl 0.1 MG/24HR Transdermal Patch Weekly"|"66076"|"Menopausal Disorder"|"3"|"1"  
"154812"|"CloNIDine HCl 0.2 MG/24HR Transdermal Patch Weekly"|"63467"|"Hypertension"|"7"|"0.5"  
"154812"|"CloNIDine HCl 0.2 MG/24HR Transdermal Patch Weekly"|"63468"|"Essential  
Hypertension"|"4"|"0.666667"  
"154812"|"CloNIDine HCl 0.2 MG/24HR Transdermal Patch Weekly"|"63470"|"Benign Essential  
Hypertension"|"5"|"0.833333"  
"154813"|"CloNIDine HCl 0.3 MG/24HR Transdermal Patch Weekly"|"63467"|"Hypertension"|"8"|"0.380952"  
"154813"|"CloNIDine HCl 0.3 MG/24HR Transdermal Patch Weekly"|"63468"|"Essential  
Hypertension"|"6"|"0.545455"  
"154813"|"CloNIDine HCl 0.3 MG/24HR Transdermal Patch Weekly"|"63470"|"Benign Essential  
Hypertension"|"5"|"0.625"  
"154813"|"CloNIDine HCl 0.3 MG/24HR Transdermal Patch Weekly"|"63471"|"Accelerated Essential  
Hypertension"|"2"|"0.666667"  
"154814"|"Tyvaso 0.6 MG/ML Inhalation Solution"|"63484"|"Pulmonary Hypertension"|"3"|"1"  
"154854"|"Lansoprazole 15 MG Oral Capsule Delayed Release"|"60895"|"Vomiting (Symptom)"|"2"|"0.666667"  
"154854"|"Lansoprazole 15 MG Oral Capsule Delayed Release"|"60899"|"Abdominal Pain"|"5"|"0.454545"  
"154854"|"Lansoprazole 15 MG Oral Capsule Delayed Release"|"64688"|"Esophageal Reflux"|"22"|"0.666667"  
"154854"|"Lansoprazole 15 MG Oral Capsule Delayed Release"|"64763"|"Gastritis"|"3"|"0.75"  
"154854"|"Lansoprazole 15 MG Oral Capsule Delayed Release"|"87736"|"Abdominal Pain In The Central Upper Belly  
(Epigastric)"|"2"|"0.666667"  
"154855"|"Lansoprazole 30 MG Oral Capsule Delayed Release"|"60891"|"Heartburn"|"7"|"0.636364"  
"154855"|"Lansoprazole 30 MG Oral Capsule Delayed Release"|"60895"|"Vomiting (Symptom)"|"4"|"0.5"  
"154855"|"Lansoprazole 30 MG Oral Capsule Delayed Release"|"60899"|"Abdominal Pain"|"32"|"0.457143"  
"154855"|"Lansoprazole 30 MG Oral Capsule Delayed Release"|"64678"|"Esophagitis"|"3"|"0.5"  
"154855"|"Lansoprazole 30 MG Oral Capsule Delayed Release"|"64680"|"Chronic Reflux  
Esophagitis"|"29"|"0.659091"  
"154855"|"Lansoprazole 30 MG Oral Capsule Delayed Release"|"64688"|"Esophageal Reflux"|"133"|"0.764368"  
"154855"|"Lansoprazole 30 MG Oral Capsule Delayed Release"|"64708"|"Barrett's Esophagus"|"2"|"0.666667"  
"154855"|"Lansoprazole 30 MG Oral Capsule Delayed Release"|"64763"|"Gastritis"|"6"|"0.25"  
"154855"|"Lansoprazole 30 MG Oral Capsule Delayed Release"|"64764"|"Gastritis Due To H. Pylori"|"3"|"0.428571"  
"154855"|"Lansoprazole 30 MG Oral Capsule Delayed Release"|"64786"|"Chronic Antral Gastritis"|"2"|"1"  
"154855"|"Lansoprazole 30 MG Oral Capsule Delayed Release"|"64825"|"Peptic Ulcer"|"3"|"0.2"  
"154855"|"Lansoprazole 30 MG Oral Capsule Delayed Release"|"64869"|"Duodenal Ulcer"|"3"|"1"  
"154855"|"Lansoprazole 30 MG Oral Capsule Delayed Release"|"64980"|"Crohn's Disease"|"3"|"0.5"  
"154855"|"Lansoprazole 30 MG Oral Capsule Delayed Release"|"65041"|"Ulcerative Colitis"|"2"|"0.5"  
"154855"|"Lansoprazole 30 MG Oral Capsule Delayed Release"|"70475"|"Scleroderma"|"3"|"0.25"  
"154855"|"Lansoprazole 30 MG Oral Capsule Delayed Release"|"70478"|"Sjogren's Syndrome"|"2"|"0.25"  
"154855"|"Lansoprazole 30 MG Oral Capsule Delayed Release"|"76976"|"Helicobacter Pylori (H. Pylori)  
Infection"|"4"|"0.571429"  
"154855"|"Lansoprazole 30 MG Oral Capsule Delayed Release"|"87736"|"Abdominal Pain In The Central Upper Belly  
(Epigastric)"|"15"|"0.714286"

"154855"|"Lansoprazole 30 MG Oral Capsule Delayed Release"|"87743"|"Diffuse Abdominal Pain"|"2"|"0.2"  
"154855"|"Lansoprazole 30 MG Oral Capsule Delayed Release"|"87744"|"Abdominal Pain In Multiple  
Locations"|"3"|"0.75"  
"154855"|"Lansoprazole 30 MG Oral Capsule Delayed Release"|"87756"|"Abdominal Pain Feels Crampy /  
Colicky"|"2"|"1"  
"154855"|"Lansoprazole 30 MG Oral Capsule Delayed Release"|"116196"|"Abdomen Tenderness Direct  
Epigastric"|"5"|"0.555556"  
"154855"|"Lansoprazole 30 MG Oral Capsule Delayed Release"|"282704"|"Acute Gastritis"|"3"|"0.5"  
"154855"|"Lansoprazole 30 MG Oral Capsule Delayed Release"|"289114"|"Laryngopharyngeal  
Reflux"|"11"|"0.785714"  
"154857"|"Renvela 0.8 GM Oral Packet"|"274639"|"Chronic Kidney Disease (NKF Classification)"|"2"|"1"  
"154880"|"TraMADol HCl 100 MG Oral Tablet Extended Release 24 Hour"|"63217"|"Congestive Heart  
Failure"|"2"|"0.5"  
"154880"|"TraMADol HCl 100 MG Oral Tablet Extended Release 24 Hour"|"91089"|"Lower Back Pain"|"3"|"0.375"  
"154880"|"TraMADol HCl 100 MG Oral Tablet Extended Release 24 Hour"|"251467"|"Limb Pain"|"2"|"0.5"  
"154880"|"TraMADol HCl 100 MG Oral Tablet Extended Release 24 Hour"|"288921"|"Chronic Pain"|"2"|"0.4"  
"154881"|"TraMADol HCl 200 MG Oral Tablet Extended Release 24 Hour"|"70455"|"Rheumatoid Arthritis"|"3"|"1"  
"154881"|"TraMADol HCl 200 MG Oral Tablet Extended Release 24 Hour"|"85623"|"Joint Pain, Localized In The  
Knee"|"3"|"0.6"  
"154881"|"TraMADol HCl 200 MG Oral Tablet Extended Release 24 Hour"|"91089"|"Lower Back  
Pain"|"2"|"0.666667"  
"154881"|"TraMADol HCl 200 MG Oral Tablet Extended Release 24 Hour"|"251467"|"Limb Pain"|"2"|"0.5"  
"154889"|"Sabril 500 MG Oral Packet"|"74988"|"Seizure Disorder"|"6"|"0.666667"  
"154889"|"Sabril 500 MG Oral Packet"|"75011"|"Infantile Spasms"|"2"|"0.666667"  
"154890"|"Phenytoin Sodium Extended 200 MG Oral Capsule"|"74988"|"Seizure Disorder"|"3"|"1"  
"154893"|"Ergocalciferol 50000 UNIT Oral Capsule"|"68058"|"Vitamin D Deficiency"|"341"|"0.817746"  
"154893"|"Ergocalciferol 50000 UNIT Oral Capsule"|"68107"|"Hypocalcemia"|"2"|"0.285714"  
"154893"|"Ergocalciferol 50000 UNIT Oral Capsule"|"69339"|"Osteomalacia"|"32"|"0.941176"  
"154893"|"Ergocalciferol 50000 UNIT Oral Capsule"|"69340"|"Osteopenia"|"9"|"0.243243"  
"154893"|"Ergocalciferol 50000 UNIT Oral Capsule"|"69341"|"Osteoporosis"|"12"|"0.121212"  
"154893"|"Ergocalciferol 50000 UNIT Oral Capsule"|"69348"|"Hyperparathyroidism"|"4"|"0.153846"  
"154893"|"Ergocalciferol 50000 UNIT Oral Capsule"|"70455"|"Rheumatoid Arthritis"|"5"|"0.147059"  
"154893"|"Ergocalciferol 50000 UNIT Oral Capsule"|"167265"|"Dysmetabolic Syndrome X"|"2"|"0.666667"  
"154893"|"Ergocalciferol 50000 UNIT Oral Capsule"|"202873"|"Anticipatory Guidance: Osteoporosis"|"3"|"0.428571"  
"154893"|"Ergocalciferol 50000 UNIT Oral Capsule"|"257944"|"Vitamin Deficiency"|"10"|"1"  
"154893"|"Ergocalciferol 50000 UNIT Oral Capsule"|"274606"|"Chronic Kidney Disease, Stage 3"|"9"|"0.290323"  
"154971"|"Ulesfia 5 % External Lotion"|"77808"|"Pediculosis Capitis"|"3"|"0.75"  
"154988"|"Alpha-Lipoic Acid 100 MG Oral Tablet"|"257912"|"Disorder Of Mitochondrial Metabolism"|"2"|"1"  
"155095"|"Contour USB Blood Glucose Sys w/Device Kit"|"69388"|"Type I Diabetes Mellitus -  
Uncontrolled"|"3"|"0.75"  
"155095"|"Contour USB Blood Glucose Sys w/Device Kit"|"69402"|"Diabetes Mellitus Poorly Controlled"|"3"|"0.6"  
"155372"|"Victoza 18 MG/3ML Subcutaneous Solution"|"69380"|"Diabetes Mellitus"|"12"|"0.109091"  
"155372"|"Victoza 18 MG/3ML Subcutaneous Solution"|"69381"|"Type II Diabetes Mellitus"|"44"|"0.478261"  
"155372"|"Victoza 18 MG/3ML Subcutaneous Solution"|"69382"|"Type II Diabetes Mellitus - Uncomplicated,  
Uncontrolled"|"7"|"0.583333"  
"155372"|"Victoza 18 MG/3ML Subcutaneous Solution"|"69402"|"Diabetes Mellitus Poorly  
Controlled"|"76"|"0.684685"  
"155380"|"Welchol 3.75 GM Oral Packet"|"67970"|"Hyperlipidemia"|"3"|"0.75"  
"155413"|"Nizatidine 15 MG/ML Oral Solution"|"60895"|"Vomiting (Symptom)"|"3"|"0.75"  
"155413"|"Nizatidine 15 MG/ML Oral Solution"|"60899"|"Abdominal Pain"|"2"|"0.666667"  
"155413"|"Nizatidine 15 MG/ML Oral Solution"|"64688"|"Esophageal Reflux"|"8"|"0.888889"  
"155413"|"Nizatidine 15 MG/ML Oral Solution"|"76442"|"Failure To Thrive In Childhood"|"2"|"0.4"  
"155413"|"Nizatidine 15 MG/ML Oral Solution"|"87736"|"Abdominal Pain In The Central Upper Belly  
(Epigastric)"|"2"|"1"

"155415""Vagifem 10 MCG Vaginal Tablet""61011""Inadequacy Of Lubrication Of Vaginal Mucosa""6""0.75"  
"155415""Vagifem 10 MCG Vaginal Tablet""66073""Menopause""2""0.666667"  
"155415""Vagifem 10 MCG Vaginal Tablet""66076""Menopausal Disorder""6""1"  
"155415""Vagifem 10 MCG Vaginal Tablet""66218""Postmenopausal Atrophic Vaginitis""13""0.8125"  
"155415""Vagifem 10 MCG Vaginal Tablet""116888""Vaginal Mucosa Atrophy""2""0.666667"  
"155415""Vagifem 10 MCG Vaginal Tablet""195794""Symptomatic Menopause""2""0.222222"  
"155415""Vagifem 10 MCG Vaginal Tablet""252495""Dyspareunia""3""1"  
"155428""Focalin XR 30 MG Oral Capsule Extended Release 24 Hour""75818""Attention-deficit Hyperactivity Disorder""2""0.4"  
"155428""Focalin XR 30 MG Oral Capsule Extended Release 24 Hour""275486""ADHD, Combined Type""2""1"  
"155433""Actemra 200 MG/10ML Intravenous Solution""70455""Rheumatoid Arthritis""4""1"  
"155434""Actemra 400 MG/20ML Intravenous Solution""70455""Rheumatoid Arthritis""3""1"  
"155436""OXcarbazepine 300 MG/5ML Oral Suspension""74960""Tuberous Sclerosis (Bourneville's Disease)""4""0.5"  
"155436""OXcarbazepine 300 MG/5ML Oral Suspension""74988""Seizure Disorder""21""0.636364"  
"155436""OXcarbazepine 300 MG/5ML Oral Suspension""75002""Partial Complex Psychomotor Seizure With Intractable Seizure""2""0.4"  
"155436""OXcarbazepine 300 MG/5ML Oral Suspension""252566""Partial Complex Seizure""3""1"  
"155441""Pramipexole Dihydrochloride 0.125 MG Oral Tablet""75054""Restless Legs Syndrome""13""0.928571"  
"155441""Pramipexole Dihydrochloride 0.125 MG Oral Tablet""75080""Parkinson's Disease""2""0.5"  
"155441""Pramipexole Dihydrochloride 0.125 MG Oral Tablet""275602""Organic Periodic Limb Movement Sleep Disorder""2""1"  
"155442""Pramipexole Dihydrochloride 1 MG Oral Tablet""75054""Restless Legs Syndrome""4""0.666667"  
"155442""Pramipexole Dihydrochloride 1 MG Oral Tablet""75080""Parkinson's Disease""13""0.866667"  
"155443""Pramipexole Dihydrochloride 1.5 MG Oral Tablet""75054""Restless Legs Syndrome""2""0.666667"  
"155443""Pramipexole Dihydrochloride 1.5 MG Oral Tablet""75080""Parkinson's Disease""14""0.823529"  
"155444""Pramipexole Dihydrochloride 0.25 MG Oral Tablet""75054""Restless Legs Syndrome""9""0.818182"  
"155444""Pramipexole Dihydrochloride 0.25 MG Oral Tablet""75080""Parkinson's Disease""10""0.909091"  
"155445""Pramipexole Dihydrochloride 0.5 MG Oral Tablet""75054""Restless Legs Syndrome""5""0.714286"  
"155445""Pramipexole Dihydrochloride 0.5 MG Oral Tablet""75080""Parkinson's Disease""11""0.6875"  
"155505""Periflex Junior Oral Powder""75807""Phenylketonuria""2""1"  
"155509""Slow Iron 160 (50 Fe) MG Oral Tablet Extended Release""77962""Anemia""2""0.666667"  
"155528""Voltaren 1 % Transdermal Gel""70146""Osteoarthritis""8""0.470588"  
"155528""Voltaren 1 % Transdermal Gel""70191""Localized Osteoarthritis Of The Hand""4""1"  
"155528""Voltaren 1 % Transdermal Gel""70455""Rheumatoid Arthritis""8""0.533333"  
"155528""Voltaren 1 % Transdermal Gel""70475""Scleroderma""3""0.6"  
"155528""Voltaren 1 % Transdermal Gel""73578""Tendonitis Of The Achilles Tendon""2""0.666667"  
"155528""Voltaren 1 % Transdermal Gel""85614""Joint Pain, Localized In The Hip""2""0.4"  
"155528""Voltaren 1 % Transdermal Gel""85623""Joint Pain, Localized In The Knee""3""0.25"  
"155528""Voltaren 1 % Transdermal Gel""251467""Limb Pain""7""0.583333"  
"155528""Voltaren 1 % Transdermal Gel""257996""Arthritis""3""0.5"  
"155572""Desitin 13 % External Cream""70130""Diaper Rash""2""1"  
"156017""Ampyra 10 MG Oral Tablet Extended Release 12 Hour""75125""Multiple Sclerosis""26""0.722222"  
"156037""Norvir 100 MG Oral Tablet""76835""HIV Infection""23""0.657143"  
"156037""Norvir 100 MG Oral Tablet""76842""Acquired Immunodeficiency Syndrome (AIDS)""7""0.777778"  
"156134""Imiquimod 5 % External Cream""76871""Common Warts""4""1"  
"156134""Imiquimod 5 % External Cream""76875""Condyloma Acuminatum""13""0.866667"  
"156134""Imiquimod 5 % External Cream""76881""Genital Warts""7""0.7"  
"156134""Imiquimod 5 % External Cream""77009""Molluscum Contagiosum""5""0.714286"  
"156140""Mirapex ER 0.375 MG Oral Tablet Extended Release 24 Hour""75080""Parkinson's Disease""3""1"  
"156146""Mirapex ER 3 MG Oral Tablet Extended Release 24 Hour""75080""Parkinson's Disease""4""0.666667"  
"156148""Camino Pro 15 BetterMilk Oral Packet""75807""Phenylketonuria""5""1"  
"156156""Mirapex ER 1.5 MG Oral Tablet Extended Release 24 Hour""75019""Cerebral Degenerations, Extrapyramidal Disorders And Movement Disorders""2""1"

"156156"|"Mirapex ER 1.5 MG Oral Tablet Extended Release 24 Hour"|"75080"|"Parkinson's Disease"|"5"|"0.416667"  
"156164"|"Mirapex ER 0.75 MG Oral Tablet Extended Release 24 Hour"|"75054"|"Restless Legs Syndrome"|"2"|"0.5"  
"156164"|"Mirapex ER 0.75 MG Oral Tablet Extended Release 24 Hour"|"75080"|"Parkinson's Disease"|"3"|"0.6"  
"156207"|"ZyrTEC Allergy 10 MG Oral Capsule"|"62577"|"Sinusitis"|"2"|"0.25"  
"156207"|"ZyrTEC Allergy 10 MG Oral Capsule"|"62598"|"Allergic Rhinitis"|"39"|"0.541667"  
"156207"|"ZyrTEC Allergy 10 MG Oral Capsule"|"93702"|"Allergies"|"2"|"0.25"  
"156224"|"Dr Smiths Diaper 10 % External Ointment"|"70130"|"Diaper Rash"|"2"|"0.5"  
"156234"|"Chlorphen Tan-Phenyleph Tan 4.5-5 MG/5ML Oral Suspension"|"62598"|"Allergic Rhinitis"|"5"|"1"  
"156305"|"NitroMist 400 MCG/SPRAY Translingual Aerosol Solution"|"62975"|"Coronary Artery Disease"|"2"|"0.333333"  
"156510"|"Diltiazem HCl Coated Beads 240 MG TB24"|"63467"|"Hypertension"|"2"|"0.4"  
"156583"|"GNP Hydrocortisone Max St 1 % External Ointment"|"70112"|"Atopic Dermatitis"|"2"|"0.666667"  
"156670"|"EPINEPHrine 0.3 MG/0.3ML Injection Device"|"78127"|"Anaphylaxis"|"2"|"0.666667"  
"156675"|"LaMICtal 25 MG Oral Tablet Chewable"|"297231"|"Epilepsy"|"2"|"1"  
"156683"|"EpiPen 0.3 MG/0.3ML Injection Device"|"78127"|"Anaphylaxis"|"3"|"1"  
"156683"|"EpiPen 0.3 MG/0.3ML Injection Device"|"78139"|"Anaphylaxis Due To Bee Venom"|"2"|"1"  
"156683"|"EpiPen 0.3 MG/0.3ML Injection Device"|"258010"|"Allergic Reaction"|"2"|"1"  
"156687"|"Dexilant 60 MG Oral Capsule Delayed Release"|"64680"|"Chronic Reflux Esophagitis"|"6"|"0.428571"  
"156687"|"Dexilant 60 MG Oral Capsule Delayed Release"|"64688"|"Esophageal Reflux"|"15"|"0.483871"  
"156687"|"Dexilant 60 MG Oral Capsule Delayed Release"|"64826"|"Gastric Ulcer"|"2"|"0.666667"  
"156688"|"Advair Diskus 100-50 MCG/DOSE Inhalation Aerosol Powder Breath Activated"|"60869"|"Cough"|"6"|"0.25"  
"156688"|"Advair Diskus 100-50 MCG/DOSE Inhalation Aerosol Powder Breath Activated"|"62598"|"Allergic Rhinitis"|"5"|"0.128205"  
"156688"|"Advair Diskus 100-50 MCG/DOSE Inhalation Aerosol Powder Breath Activated"|"64180"|"Reactive Airway Disease"|"3"|"0.75"  
"156688"|"Advair Diskus 100-50 MCG/DOSE Inhalation Aerosol Powder Breath Activated"|"64181"|"Asthma"|"37"|"0.528571"  
"156688"|"Advair Diskus 100-50 MCG/DOSE Inhalation Aerosol Powder Breath Activated"|"64205"|"Chronic Obstructive Pulmonary Disease"|"8"|"0.533333"  
"156688"|"Advair Diskus 100-50 MCG/DOSE Inhalation Aerosol Powder Breath Activated"|"64206"|"Chronic Bronchitis"|"3"|"0.5"  
"156688"|"Advair Diskus 100-50 MCG/DOSE Inhalation Aerosol Powder Breath Activated"|"64211"|"Chronic Asthmatic Bronchitis"|"2"|"0.666667"  
"156688"|"Advair Diskus 100-50 MCG/DOSE Inhalation Aerosol Powder Breath Activated"|"64212"|"Emphysema"|"3"|"0.428571"  
"156688"|"Advair Diskus 100-50 MCG/DOSE Inhalation Aerosol Powder Breath Activated"|"297031"|"Intermittent Asthma"|"3"|"0.75"  
"156699"|"EpiPen 2-Pak 0.3 MG/0.3ML Injection Device"|"62598"|"Allergic Rhinitis"|"5"|"0.263158"  
"156699"|"EpiPen 2-Pak 0.3 MG/0.3ML Injection Device"|"64181"|"Asthma"|"3"|"0.1875"  
"156699"|"EpiPen 2-Pak 0.3 MG/0.3ML Injection Device"|"69942"|"Allergic Urticaria"|"3"|"1"  
"156699"|"EpiPen 2-Pak 0.3 MG/0.3ML Injection Device"|"78127"|"Anaphylaxis"|"3"|"0.75"  
"156699"|"EpiPen 2-Pak 0.3 MG/0.3ML Injection Device"|"78139"|"Anaphylaxis Due To Bee Venom"|"2"|"0.666667"  
"156699"|"EpiPen 2-Pak 0.3 MG/0.3ML Injection Device"|"93736"|"Allergy To Insect Bites / Stings"|"2"|"1"  
"156707"|"Norditropin FlexPro 15 MG/1.5ML Subcutaneous Solution"|"69214"|"Hypopituitarism"|"4"|"1"  
"156707"|"Norditropin FlexPro 15 MG/1.5ML Subcutaneous Solution"|"278753"|"Anemia Of Chronic Kidney Disease"|"2"|"1"  
"156717"|"Dexilant 30 MG Oral Capsule Delayed Release"|"64680"|"Chronic Reflux Esophagitis"|"2"|"0.5"  
"156717"|"Dexilant 30 MG Oral Capsule Delayed Release"|"64688"|"Esophageal Reflux"|"2"|"0.4"  
"156723"|"Flomax 0.4 MG Oral Capsule"|"289131"|"Benign Prostatic Hypertrophy"|"5"|"0.217391"  
"156725"|"Tamsulosin HCl 0.4 MG Oral Capsule"|"65669"|"Urinary Calculus"|"4"|"0.4"  
"156725"|"Tamsulosin HCl 0.4 MG Oral Capsule"|"65769"|"Neurogenic Bladder"|"4"|"1"  
"156725"|"Tamsulosin HCl 0.4 MG Oral Capsule"|"65777"|"Urge Incontinence Of Urine"|"2"|"0.333333"  
"156725"|"Tamsulosin HCl 0.4 MG Oral Capsule"|"65784"|"Hyperactivity Of The Bladder"|"2"|"0.5"

"156725""Tamsulosin HCl 0.4 MG Oral Capsule""65825""Benign Prostatic Hyperplasia""8""0.444444"  
"156725""Tamsulosin HCl 0.4 MG Oral Capsule""65831""Prostatitis""4""0.666667"  
"156725""Tamsulosin HCl 0.4 MG Oral Capsule""65856""Urethral Stricture""2""0.4"  
"156725""Tamsulosin HCl 0.4 MG Oral Capsule""80831""Adenocarcinoma Of The Prostate Gland""2""0.4"  
"156725""Tamsulosin HCl 0.4 MG Oral Capsule""87742""Abdominal Pain Above The Pubic Area  
(Suprapubic)""2""0.666667"  
"156725""Tamsulosin HCl 0.4 MG Oral Capsule""87901""Urinary Frequency Increased""6""0.545455"  
"156725""Tamsulosin HCl 0.4 MG Oral Capsule""87908""Urinary Stream Is Smaller""2""1"  
"156725""Tamsulosin HCl 0.4 MG Oral Capsule""251181""Urinary Frequency""3""0.25"  
"156725""Tamsulosin HCl 0.4 MG Oral Capsule""257887""Benign Prostatic Hyperplasia With Urinary  
Obstruction""6""0.857143"  
"156725""Tamsulosin HCl 0.4 MG Oral Capsule""257888""Prostatic Hyperplasia""3""0.75"  
"156725""Tamsulosin HCl 0.4 MG Oral Capsule""257889""Prostatic Hyperplasia With Urinary Obstruction""2""1"  
"156725""Tamsulosin HCl 0.4 MG Oral Capsule""278812""Prostate Cancer""4""0.190476"  
"156725""Tamsulosin HCl 0.4 MG Oral Capsule""283036""Obstructive Uropathy""3""0.6"  
"156725""Tamsulosin HCl 0.4 MG Oral Capsule""283128""Benign Localized Prostatic Hyperplasia""5""0.714286"  
"156725""Tamsulosin HCl 0.4 MG Oral Capsule""283130""Benign Localized Prostatic Hyperplasia Without Urinary  
Obstruction With Other Lower Urinary Tract Symptoms""12""0.8"  
"156725""Tamsulosin HCl 0.4 MG Oral Capsule""283131""Benign Prostatic Hyperplasia Localized With Urinary  
Obstruction With Other Lower Urinary Tract Symptoms""17""0.85"  
"156725""Tamsulosin HCl 0.4 MG Oral Capsule""283133""Prostatic Hyperplasia With Urinary Obstruction With  
Other Lower Urinary Tract Symptoms""3""1"  
"156725""Tamsulosin HCl 0.4 MG Oral Capsule""285039""Taking Medication For A Long Time""2""0.2"  
"156725""Tamsulosin HCl 0.4 MG Oral Capsule""289130""Benign Prostatic Hypertrophy With Urinary  
Obstruction""11""0.578947"  
"156725""Tamsulosin HCl 0.4 MG Oral Capsule""289131""Benign Prostatic Hypertrophy""75""0.635593"  
"156725""Tamsulosin HCl 0.4 MG Oral Capsule""289132""Benign Prostatic Hypertrophy Without Urinary  
Obstruction With Other Lower Urinary Tract Symptoms""2""1"  
"156725""Tamsulosin HCl 0.4 MG Oral Capsule""289133""Benign Prostatic Hypertrophy With Urinary Obstruction  
With Other Lower Urinary Tract Symptoms""4""0.666667"  
"156728""EpiPen Jr 0.15 MG/0.3ML Injection Device""93725""Allergy To Peanuts""2""1"  
"156743""EpiPen Jr 2-Pak 0.15 MG/0.3ML Injection Device""78127""Anaphylaxis""2""0.5"  
"156743""EpiPen Jr 2-Pak 0.15 MG/0.3ML Injection Device""78129""Anaphylaxis Due To Peanuts""3""1"  
"156743""EpiPen Jr 2-Pak 0.15 MG/0.3ML Injection Device""78137""Anaphylaxis Due To Eggs""2""1"  
"156743""EpiPen Jr 2-Pak 0.15 MG/0.3ML Injection Device""93725""Allergy To Peanuts""6""0.6"  
"156743""EpiPen Jr 2-Pak 0.15 MG/0.3ML Injection Device""292716""Allergies To Multiple Foods""3""1"  
"156744""Advair Diskus 500-50 MCG/DOSE Inhalation Aerosol Powder Breath  
Activated""60869""Cough""2""0.222222"  
"156744""Advair Diskus 500-50 MCG/DOSE Inhalation Aerosol Powder Breath Activated""64118""Acute  
Bronchitis""2""0.222222"  
"156744""Advair Diskus 500-50 MCG/DOSE Inhalation Aerosol Powder Breath Activated""64180""Reactive Airway  
Disease""2""0.666667"  
"156744""Advair Diskus 500-50 MCG/DOSE Inhalation Aerosol Powder Breath  
Activated""64181""Asthma""38""0.77551"  
"156744""Advair Diskus 500-50 MCG/DOSE Inhalation Aerosol Powder Breath Activated""64205""Chronic  
Obstructive Pulmonary Disease""11""0.55"  
"156747""LamoTRigine 5 MG Oral Tablet Chewable""74988""Seizure Disorder""3""1"  
"156752""Advair Diskus 250-50 MCG/DOSE Inhalation Aerosol Powder Breath Activated""60863""Difficulty  
Breathing (Dyspnea)""8""0.181818"  
"156752""Advair Diskus 250-50 MCG/DOSE Inhalation Aerosol Powder Breath  
Activated""60869""Cough""16""0.242424"  
"156752""Advair Diskus 250-50 MCG/DOSE Inhalation Aerosol Powder Breath Activated""64118""Acute  
Bronchitis""6""0.193548"  
"156752""Advair Diskus 250-50 MCG/DOSE Inhalation Aerosol Powder Breath Activated""64180""Reactive Airway

Disease|"8|"0.444444"  
"156752|"Advair Diskus 250-50 MCG/DOSE Inhalation Aerosol Powder Breath  
Activated|"64181|"Asthma|"117|"0.590909"  
"156752|"Advair Diskus 250-50 MCG/DOSE Inhalation Aerosol Powder Breath Activated|"64183|"Mild Persistent  
Asthma|"2|"1"  
"156752|"Advair Diskus 250-50 MCG/DOSE Inhalation Aerosol Powder Breath Activated|"64184|"Moderate  
Persistent Asthma|"8|"0.888889"  
"156752|"Advair Diskus 250-50 MCG/DOSE Inhalation Aerosol Powder Breath Activated|"64205|"Chronic  
Obstructive Pulmonary Disease|"78|"0.735849"  
"156752|"Advair Diskus 250-50 MCG/DOSE Inhalation Aerosol Powder Breath Activated|"64206|"Chronic  
Bronchitis|"5|"0.416667"  
"156752|"Advair Diskus 250-50 MCG/DOSE Inhalation Aerosol Powder Breath  
Activated|"64212|"Emphysema|"13|"0.565217"  
"156752|"Advair Diskus 250-50 MCG/DOSE Inhalation Aerosol Powder Breath  
Activated|"64223|"Bronchiectasis|"4|"0.571429"  
"156752|"Advair Diskus 250-50 MCG/DOSE Inhalation Aerosol Powder Breath Activated|"70472|"Systemic Lupus  
Erythematosus|"2|"0.333333"  
"156752|"Advair Diskus 250-50 MCG/DOSE Inhalation Aerosol Powder Breath Activated|"247012|"Shortness Of  
Breath|"8|"0.275862"  
"156752|"Advair Diskus 250-50 MCG/DOSE Inhalation Aerosol Powder Breath Activated|"258832|"Cough Variant  
Asthma|"4|"0.571429"  
"156752|"Advair Diskus 250-50 MCG/DOSE Inhalation Aerosol Powder Breath  
Activated|"258835|"Bronchitis|"3|"0.107143"  
"156752|"Advair Diskus 250-50 MCG/DOSE Inhalation Aerosol Powder Breath Activated|"277881|"Childhood  
Asthma|"2|"0.5"  
"156752|"Advair Diskus 250-50 MCG/DOSE Inhalation Aerosol Powder Breath Activated|"277914|"Acute  
Bronchitis With Bronchospasm|"2|"0.4"  
"156752|"Advair Diskus 250-50 MCG/DOSE Inhalation Aerosol Powder Breath Activated|"297031|"Intermittent  
Asthma|"3|"0.333333"  
"156754|"LamoTRiGINE 25 MG Oral Tablet Chewable|"74988|"Seizure Disorder|"7|"0.875"  
"156754|"LamoTRiGINE 25 MG Oral Tablet Chewable|"297231|"Epilepsy|"3|"0.75"  
"156773|"Metaxalone 800 MG Oral Tablet|"70455|"Rheumatoid Arthritis|"4|"0.666667"  
"156773|"Metaxalone 800 MG Oral Tablet|"73403|"Neck Sprain|"2|"0.666667"  
"156773|"Metaxalone 800 MG Oral Tablet|"73454|"Lumbar Sprain|"2|"0.666667"  
"156773|"Metaxalone 800 MG Oral Tablet|"73464|"Lower Back Sprain|"3|"0.6"  
"156773|"Metaxalone 800 MG Oral Tablet|"73666|"Backache|"11|"0.611111"  
"156773|"Metaxalone 800 MG Oral Tablet|"75717|"Cervicalgia|"3|"0.333333"  
"156773|"Metaxalone 800 MG Oral Tablet|"75811|"Muscle Spasm|"13|"0.65"  
"156773|"Metaxalone 800 MG Oral Tablet|"75812|"Myalgia And Myositis|"8|"0.727273"  
"156773|"Metaxalone 800 MG Oral Tablet|"85623|"Joint Pain, Localized In The Knee|"2|"0.285714"  
"156773|"Metaxalone 800 MG Oral Tablet|"85691|"Neck Pain|"7|"0.777778"  
"156773|"Metaxalone 800 MG Oral Tablet|"91089|"Lower Back Pain|"12|"0.521739"  
"156773|"Metaxalone 800 MG Oral Tablet|"115846|"Back Muscle Spasm|"2|"0.4"  
"156773|"Metaxalone 800 MG Oral Tablet|"172080|"Neck Strain|"4|"0.666667"  
"156773|"Metaxalone 800 MG Oral Tablet|"172086|"Lumbar Strain|"7|"0.777778"  
"156773|"Metaxalone 800 MG Oral Tablet|"288921|"Chronic Pain|"2|"0.25"  
"156773|"Metaxalone 800 MG Oral Tablet|"288977|"Fibromyalgia|"2|"0.2"  
"156854|"Losartan Potassium 25 MG Oral Tablet|"63217|"Congestive Heart Failure|"6|"0.352941"  
"156854|"Losartan Potassium 25 MG Oral Tablet|"63467|"Hypertension|"56|"0.56"  
"156854|"Losartan Potassium 25 MG Oral Tablet|"63468|"Essential Hypertension|"16|"0.457143"  
"156854|"Losartan Potassium 25 MG Oral Tablet|"63470|"Benign Essential Hypertension|"18|"0.5625"  
"156854|"Losartan Potassium 25 MG Oral Tablet|"69380|"Diabetes Mellitus|"6|"0.109091"  
"156854|"Losartan Potassium 25 MG Oral Tablet|"274717|"Microalbuminuria|"2|"0.666667"  
"156866|"Losartan Potassium-HCTZ 50-12.5 MG Oral Tablet|"63467|"Hypertension|"30|"0.441176"

"156866"|"Losartan Potassium-HCTZ 50-12.5 MG Oral Tablet"|"63468"|"Essential Hypertension"|"32"|"0.727273"  
"156866"|"Losartan Potassium-HCTZ 50-12.5 MG Oral Tablet"|"63470"|"Benign Essential  
Hypertension"|"19"|"0.730769"  
"156874"|"Losartan Potassium 50 MG Oral Tablet"|"63217"|"Congestive Heart Failure"|"5"|"0.25"  
"156874"|"Losartan Potassium 50 MG Oral Tablet"|"63232"|"Benign Hypertensive Heart Disease"|"2"|"0.666667"  
"156874"|"Losartan Potassium 50 MG Oral Tablet"|"63467"|"Hypertension"|"99"|"0.507692"  
"156874"|"Losartan Potassium 50 MG Oral Tablet"|"63468"|"Essential Hypertension"|"51"|"0.6"  
"156874"|"Losartan Potassium 50 MG Oral Tablet"|"63470"|"Benign Essential Hypertension"|"61"|"0.642105"  
"156874"|"Losartan Potassium 50 MG Oral Tablet"|"63471"|"Accelerated Essential Hypertension"|"3"|"0.6"  
"156878"|"Losartan Potassium-HCTZ 100-25 MG Oral Tablet"|"63467"|"Hypertension"|"51"|"0.542553"  
"156878"|"Losartan Potassium-HCTZ 100-25 MG Oral Tablet"|"63468"|"Essential Hypertension"|"32"|"0.592593"  
"156878"|"Losartan Potassium-HCTZ 100-25 MG Oral Tablet"|"63470"|"Benign Essential  
Hypertension"|"29"|"0.674419"  
"156879"|"Losartan Potassium-HCTZ 100-12.5 MG Oral Tablet"|"63467"|"Hypertension"|"11"|"0.52381"  
"156879"|"Losartan Potassium-HCTZ 100-12.5 MG Oral Tablet"|"63468"|"Essential Hypertension"|"10"|"0.769231"  
"156879"|"Losartan Potassium-HCTZ 100-12.5 MG Oral Tablet"|"63470"|"Benign Essential  
Hypertension"|"6"|"0.857143"  
"156885"|"Losartan Potassium 100 MG Oral Tablet"|"63217"|"Congestive Heart Failure"|"3"|"0.214286"  
"156885"|"Losartan Potassium 100 MG Oral Tablet"|"63467"|"Hypertension"|"66"|"0.540984"  
"156885"|"Losartan Potassium 100 MG Oral Tablet"|"63468"|"Essential Hypertension"|"33"|"0.507692"  
"156885"|"Losartan Potassium 100 MG Oral Tablet"|"63470"|"Benign Essential Hypertension"|"45"|"0.75"  
"157082"|"Cambia 50 MG Oral Packet"|"74534"|"Classic Migraine (With Aura)"|"2"|"1"  
"157082"|"Cambia 50 MG Oral Packet"|"74537"|"Common Migraine (Without Aura)"|"2"|"1"  
"157085"|"Nutropin AQ NuSpin 20 20 MG/2ML Subcutaneous Solution"|"67687"|"Growth Hormone Deficiency  
(Pituitary Dwarfism)"|"2"|"0.666667"  
"157085"|"Nutropin AQ NuSpin 20 20 MG/2ML Subcutaneous Solution"|"69214"|"Hypopituitarism"|"2"|"1"  
"157106"|"Xifaxan 550 MG Oral Tablet"|"64934"|"Small Bowel Bacterial Overgrowth"|"2"|"1"  
"157169"|"Amoxicillin-Pot Clavulanate 1000-62.5 MG Oral Tablet Extended Release 12 Hour"|"251528"|"Acute Otitis  
Media"|"2"|"1"  
"157805"|"Clonazepam 0.5 MG Oral Tablet Dispersible"|"61118"|"Anxiety (Symptom)"|"3"|"1"  
"157818"|"Clonazepam 0.25 MG Oral Tablet Dispersible"|"61118"|"Anxiety (Symptom)"|"5"|"0.714286"  
"157818"|"Clonazepam 0.25 MG Oral Tablet Dispersible"|"76414"|"REM Sleep Behavior Syndrome"|"3"|"0.75"  
"157818"|"Clonazepam 0.25 MG Oral Tablet Dispersible"|"76536"|"Generalized Anxiety Disorder"|"4"|"0.8"  
"157818"|"Clonazepam 0.25 MG Oral Tablet Dispersible"|"196089"|"Adjustment Disorder With Anxiety And  
Depressed Mood"|"2"|"1"  
"157842"|"Lactulose 20 GM/30ML Oral Solution"|"79148"|"Malignant Pancreatic Neoplasm"|"2"|"1"  
"157842"|"Lactulose 20 GM/30ML Oral Solution"|"166777"|"Constipation"|"5"|"0.714286"  
"157857"|"Livalo 2 MG Oral Tablet"|"62975"|"Coronary Artery Disease"|"4"|"0.266667"  
"157857"|"Livalo 2 MG Oral Tablet"|"67970"|"Hyperlipidemia"|"12"|"0.666667"  
"157866"|"Livalo 4 MG Oral Tablet"|"67970"|"Hyperlipidemia"|"11"|"0.733333"  
"157878"|"Clonazepam 0.125 MG Oral Tablet Dispersible"|"74988"|"Seizure Disorder"|"2"|"0.4"  
"157878"|"Clonazepam 0.125 MG Oral Tablet Dispersible"|"166407"|"Delayed Developmental  
Milestones"|"2"|"0.333333"  
"158017"|"Vimpat 10 MG/ML Oral Solution"|"74988"|"Seizure Disorder"|"2"|"0.4"  
"158017"|"Vimpat 10 MG/ML Oral Solution"|"297231"|"Epilepsy"|"2"|"1"  
"158019"|"Famotidine 40 MG/5ML Oral Suspension Reconstituted"|"60895"|"Vomiting (Symptom)"|"2"|"0.666667"  
"158019"|"Famotidine 40 MG/5ML Oral Suspension Reconstituted"|"64688"|"Esophageal Reflux"|"8"|"1"  
"158023"|"Uribel 118 MG Oral Capsule"|"60928"|"Pain During Urination (Dysuria)"|"3"|"0.75"  
"158023"|"Uribel 118 MG Oral Capsule"|"65762"|"Urinary Tract Infection"|"5"|"0.357143"  
"158024"|"Gianvi 3-0.02 MG Oral Tablet"|"69549"|"Polycystic Ovarian Syndrome"|"6"|"0.75"  
"158024"|"Gianvi 3-0.02 MG Oral Tablet"|"187792"|"Gynecologic Services Contraceptive Management"|"5"|"0.5"  
"158073"|"Omeprazole Magnesium 20.6 (20 Base) MG Oral Capsule Delayed Release"|"64688"|"Esophageal  
Reflux"|"4"|"1"  
"158113"|"Prolia 60 MG/ML Subcutaneous Solution"|"69341"|"Osteoporosis"|"4"|"1"

"158126"|"Adapalene 0.1 % External Gel"|"69606"|"Acne"|"14"|"1"  
"158126"|"Adapalene 0.1 % External Gel"|"69607"|"Acne Vulgaris"|"2"|"0.5"  
"158275"|"Jalyn 0.5-0.4 MG Oral Capsule"|"283131"|"Benign Prostatic Hyperplasia Localized With Urinary  
Obstruction With Other Lower Urinary Tract Symptoms"|"2"|"1"  
"158275"|"Jalyn 0.5-0.4 MG Oral Capsule"|"289131"|"Benign Prostatic Hypertrophy"|"4"|"0.8"  
"158325"|"AzelaStine HCl 137 MCG/SPRAY Nasal Solution"|"62580"|"Acute Maxillary Sinusitis"|"2"|"0.5"  
"158325"|"AzelaStine HCl 137 MCG/SPRAY Nasal Solution"|"62586"|"Chronic Maxillary Sinusitis"|"2"|"0.285714"  
"158325"|"AzelaStine HCl 137 MCG/SPRAY Nasal Solution"|"62597"|"Rhinitis"|"2"|"0.666667"  
"158325"|"AzelaStine HCl 137 MCG/SPRAY Nasal Solution"|"62598"|"Allergic Rhinitis"|"34"|"0.73913"  
"158325"|"AzelaStine HCl 137 MCG/SPRAY Nasal Solution"|"62611"|"Chronic Rhinitis"|"4"|"0.444444"  
"158325"|"AzelaStine HCl 137 MCG/SPRAY Nasal Solution"|"77891"|"Acute Upper Respiratory  
Infection"|"4"|"0.363636"  
"158325"|"AzelaStine HCl 137 MCG/SPRAY Nasal Solution"|"87011"|"Drip Or Drainage Down Throat From  
Above"|"2"|"0.666667"  
"158409"|"Rivastigmine Tartrate 1.5 MG Oral Capsule"|"61048"|"Memory Lapses Or Loss"|"2"|"1"  
"158411"|"Venlafaxine HCl 150 MG Oral Capsule Extended Release 24 Hour"|"76306"|"Episodic Mood  
Disorders"|"2"|"1"  
"158411"|"Venlafaxine HCl 150 MG Oral Capsule Extended Release 24 Hour"|"76348"|"Bipolar II Disorder"|"2"|"1"  
"158411"|"Venlafaxine HCl 150 MG Oral Capsule Extended Release 24 Hour"|"76351"|"Depression"|"5"|"0.454545"  
"158411"|"Venlafaxine HCl 150 MG Oral Capsule Extended Release 24 Hour"|"76357"|"Major Depression,  
Recurrent"|"2"|"0.666667"  
"158411"|"Venlafaxine HCl 150 MG Oral Capsule Extended Release 24 Hour"|"76388"|"Bipolar Disorder  
NOS"|"2"|"1"  
"158411"|"Venlafaxine HCl 150 MG Oral Capsule Extended Release 24 Hour"|"76536"|"Generalized Anxiety  
Disorder"|"4"|"1"  
"158444"|"Venlafaxine HCl 37.5 MG Oral Capsule Extended Release 24 Hour"|"60984"|"Sudden Redness Of The Skin  
(Flushing)"|"2"|"0.666667"  
"158444"|"Venlafaxine HCl 37.5 MG Oral Capsule Extended Release 24 Hour"|"76351"|"Depression"|"18"|"0.782609"  
"158444"|"Venlafaxine HCl 37.5 MG Oral Capsule Extended Release 24 Hour"|"76357"|"Major Depression,  
Recurrent"|"2"|"0.666667"  
"158444"|"Venlafaxine HCl 37.5 MG Oral Capsule Extended Release 24 Hour"|"195794"|"Symptomatic  
Menopause"|"5"|"1"  
"158444"|"Venlafaxine HCl 37.5 MG Oral Capsule Extended Release 24 Hour"|"275604"|"Depression With  
Anxiety"|"2"|"0.666667"  
"158454"|"Rivastigmine Tartrate 6 MG Oral Capsule"|"75020"|"Alzheimer's Disease"|"2"|"1"  
"158461"|"Venlafaxine HCl 75 MG Oral Capsule Extended Release 24 Hour"|"61118"|"Anxiety (Symptom)"|"2"|"0.4"  
"158461"|"Venlafaxine HCl 75 MG Oral Capsule Extended Release 24 Hour"|"76272"|"Schizoaffective  
Disorder"|"2"|"1"  
"158461"|"Venlafaxine HCl 75 MG Oral Capsule Extended Release 24 Hour"|"76348"|"Bipolar II Disorder"|"2"|"1"  
"158461"|"Venlafaxine HCl 75 MG Oral Capsule Extended Release 24 Hour"|"76351"|"Depression"|"17"|"0.73913"  
"158461"|"Venlafaxine HCl 75 MG Oral Capsule Extended Release 24 Hour"|"76357"|"Major Depression,  
Recurrent"|"2"|"0.4"  
"158461"|"Venlafaxine HCl 75 MG Oral Capsule Extended Release 24 Hour"|"76536"|"Generalized Anxiety  
Disorder"|"2"|"0.5"  
"158461"|"Venlafaxine HCl 75 MG Oral Capsule Extended Release 24 Hour"|"76587"|"Anxiety Disorder  
NOS"|"3"|"0.6"  
"158461"|"Venlafaxine HCl 75 MG Oral Capsule Extended Release 24 Hour"|"195794"|"Symptomatic  
Menopause"|"3"|"0.75"  
"158468"|"Anastrozole 1 MG Oral Tablet"|"80524"|"Adenocarcinoma Of The Breast"|"9"|"0.818182"  
"158468"|"Anastrozole 1 MG Oral Tablet"|"179542"|"Malignant Breast Neoplasm"|"3"|"1"  
"158468"|"Anastrozole 1 MG Oral Tablet"|"278808"|"Breast Cancer"|"16"|"0.727273"  
"158551"|"Naratriptan HCl 2.5 MG Oral Tablet"|"74537"|"Common Migraine (Without Aura)"|"2"|"1"  
"158559"|"Omeprazole-Sodium Bicarbonate 40-1100 MG Oral Capsule"|"64680"|"Chronic Reflux  
Esophagitis"|"4"|"0.8"

"158559"|"Omeprazole-Sodium Bicarbonate 40-1100 MG Oral Capsule"|"64688"|"Esophageal Reflux"|"5"|"0.714286"  
"158560"|"Clindamycin Palmitate HCl 75 MG/5ML Oral Solution Reconstituted"|"32925"|"Chronic Respiratory  
Failure"|"3"|"1"  
"158560"|"Clindamycin Palmitate HCl 75 MG/5ML Oral Solution Reconstituted"|"60869"|"Cough"|"2"|"0.285714"  
"158560"|"Clindamycin Palmitate HCl 75 MG/5ML Oral Solution Reconstituted"|"62598"|"Allergic  
Rhinitis"|"3"|"0.15"  
"158560"|"Clindamycin Palmitate HCl 75 MG/5ML Oral Solution Reconstituted"|"67695"|"Cystic  
Fibrosis"|"2"|"0.285714"  
"158560"|"Clindamycin Palmitate HCl 75 MG/5ML Oral Solution Reconstituted"|"69999"|"Cellulitis"|"8"|"0.727273"  
"158560"|"Clindamycin Palmitate HCl 75 MG/5ML Oral Solution Reconstituted"|"70019"|"Cellulitis Of The  
Toes"|"2"|"1"  
"158560"|"Clindamycin Palmitate HCl 75 MG/5ML Oral Solution Reconstituted"|"70027"|"Folliculitis"|"2"|"0.5"  
"158560"|"Clindamycin Palmitate HCl 75 MG/5ML Oral Solution Reconstituted"|"70060"|"Impetigo"|"4"|"0.666667"  
"158560"|"Clindamycin Palmitate HCl 75 MG/5ML Oral Solution Reconstituted"|"70112"|"Atopic  
Dermatitis"|"3"|"0.25"  
"158635"|"Adapalene 0.1 % External Cream"|"69606"|"Acne"|"8"|"1"  
"158676"|"Dulera 100-5 MCG/ACT Inhalation Aerosol"|"64181"|"Asthma"|"2"|"1"  
"158754"|"Enoxaparin Sodium 120 MG/0.8ML Subcutaneous Solution"|"62916"|"Atrial Fibrillation"|"2"|"1"  
"158755"|"Enoxaparin Sodium 100 MG/ML Subcutaneous Solution"|"64277"|"Pulmonary Embolism"|"2"|"0.5"  
"158755"|"Enoxaparin Sodium 100 MG/ML Subcutaneous Solution"|"257802"|"Venous Thrombosis Of The Deep  
Vessels Of The Lower Extremity"|"2"|"0.5"  
"158767"|"Vitamin D 2000 UNIT Oral Capsule"|"68058"|"Vitamin D Deficiency"|"15"|"0.681818"  
"158778"|"Enoxaparin Sodium 60 MG/0.6ML Subcutaneous Solution"|"62917"|"Paroxysmal Atrial Fibrillation"|"2"|"1"  
"158778"|"Enoxaparin Sodium 60 MG/0.6ML Subcutaneous Solution"|"257802"|"Venous Thrombosis Of The Deep  
Vessels Of The Lower Extremity"|"2"|"0.666667"  
"158782"|"Enoxaparin Sodium 40 MG/0.4ML Subcutaneous Solution"|"64041"|"Thromboembolic  
Disease"|"2"|"0.666667"  
"158782"|"Enoxaparin Sodium 40 MG/0.4ML Subcutaneous Solution"|"64277"|"Pulmonary Embolism"|"5"|"1"  
"158782"|"Enoxaparin Sodium 40 MG/0.4ML Subcutaneous Solution"|"251467"|"Limb Pain"|"4"|"0.571429"  
"158782"|"Enoxaparin Sodium 40 MG/0.4ML Subcutaneous Solution"|"257802"|"Venous Thrombosis Of The Deep  
Vessels Of The Lower Extremity"|"4"|"0.8"  
"158782"|"Enoxaparin Sodium 40 MG/0.4ML Subcutaneous Solution"|"274406"|"Pregnancy Test  
Positive"|"2"|"0.666667"  
"158782"|"Enoxaparin Sodium 40 MG/0.4ML Subcutaneous Solution"|"296985"|"Acute Venous Thrombosis Of The  
Deep Vessels Of The Lower Extremity"|"2"|"1"  
"158788"|"Enoxaparin Sodium 80 MG/0.8ML Subcutaneous Solution"|"75354"|"Cerebral Artery Thrombosis - With  
Cerebral Infarction"|"2"|"1"  
"158788"|"Enoxaparin Sodium 80 MG/0.8ML Subcutaneous Solution"|"257802"|"Venous Thrombosis Of The Deep  
Vessels Of The Lower Extremity"|"3"|"0.75"  
"158818"|"Aricept 23 MG Oral Tablet"|"61048"|"Memory Lapses Or Loss"|"4"|"0.444444"  
"158818"|"Aricept 23 MG Oral Tablet"|"75020"|"Alzheimer's Disease"|"10"|"0.5"  
"158818"|"Aricept 23 MG Oral Tablet"|"75032"|"Vascular Dementia"|"2"|"0.5"  
"158818"|"Aricept 23 MG Oral Tablet"|"251600"|"Dementia"|"9"|"0.428571"  
"158818"|"Aricept 23 MG Oral Tablet"|"252573"|"Frontotemporal Dementia"|"4"|"0.666667"  
"158818"|"Aricept 23 MG Oral Tablet"|"252575"|"Dementia With Lewy Bodies"|"4"|"1"  
"158914"|"Simcor 500-40 MG Oral Tablet Extended Release 24 Hour"|"291485"|"Dyslipidemia"|"2"|"1"  
"158975"|"Apidra SoloStar 100 UNIT/ML Subcutaneous Solution"|"69381"|"Type II Diabetes Mellitus"|"2"|"0.666667"  
"158975"|"Apidra SoloStar 100 UNIT/ML Subcutaneous Solution"|"69388"|"Type I Diabetes Mellitus -  
Uncontrolled"|"2"|"0.666667"  
"159195"|"Vitamin D3 400 UNIT Oral Tablet Chewable"|"69340"|"Osteopenia"|"2"|"1"  
"159221"|"Diazepam 10 MG Rectal Gel"|"74988"|"Seizure Disorder"|"3"|"1"  
"159281"|"Zarah 3-0.03 MG Oral Tablet"|"250989"|"Oral Contraceptives"|"3"|"1"  
"159319"|"Neomycin-Polymyxin-Dexameth 3.5-10000-0.1 Ophthalmic Suspension"|"284040"|"Abrasion Of The Left  
Cornea"|"2"|"1"

"159322"|"Neomycin-Polymyxin-Dexameth 3.5-10000-0.1 Ophthalmic Ointment"|"61323"|"Stye In The Left Eye"|"2"|"1"

"159417"|"Gilenya 0.5 MG Oral Capsule"|"75125"|"Multiple Sclerosis"|"7"|"0.304348"

"159542"|"Beyaz 3-0.02-0.451 MG Oral Tablet"|"187792"|"Gynecologic Services Contraceptive Management"|"6"|"0.666667"

"159542"|"Beyaz 3-0.02-0.451 MG Oral Tablet"|"250989"|"Oral Contraceptives"|"8"|"1"

"159603"|"Hydrocod Polst-Chlorphen Polst 10-8 MG/5ML Oral Liquid Extended Release"|"60869"|"Cough"|"22"|"0.785714"

"159603"|"Hydrocod Polst-Chlorphen Polst 10-8 MG/5ML Oral Liquid Extended Release"|"64118"|"Acute Bronchitis"|"3"|"0.272727"

"159603"|"Hydrocod Polst-Chlorphen Polst 10-8 MG/5ML Oral Liquid Extended Release"|"77890"|"Upper Respiratory Infection"|"3"|"0.333333"

"159637"|"Pramipexole Dihydrochloride 0.75 MG Oral Tablet"|"75080"|"Parkinson's Disease"|"2"|"1"

"159638"|"Norethindrone 0.35 MG Oral Tablet"|"85949"|"Birth Control Method - Oral Contraceptives"|"2"|"1"

"159638"|"Norethindrone 0.35 MG Oral Tablet"|"187792"|"Gynecologic Services Contraceptive Management"|"15"|"0.833333"

"159638"|"Norethindrone 0.35 MG Oral Tablet"|"250989"|"Oral Contraceptives"|"7"|"0.875"

"159655"|"Zolpidem Tartrate 6.25 MG Oral Tablet Extended Release"|"60828"|"Headache"|"2"|"0.333333"

"159655"|"Zolpidem Tartrate 6.25 MG Oral Tablet Extended Release"|"61103"|"Sleep Disturbances"|"2"|"0.666667"

"159655"|"Zolpidem Tartrate 6.25 MG Oral Tablet Extended Release"|"61108"|"Insomnia"|"35"|"0.875"

"159655"|"Zolpidem Tartrate 6.25 MG Oral Tablet Extended Release"|"76402"|"Circadian Rhythm Sleep Disorder Jet Lag Type"|"2"|"1"

"159655"|"Zolpidem Tartrate 6.25 MG Oral Tablet Extended Release"|"76404"|"Sleep-wake Schedule Disorder, Frequently Changing"|"2"|"1"

"159678"|"Lansoprazole 15 MG Oral Tablet Dispersible"|"60895"|"Vomiting (Symptom)"|"3"|"0.3"

"159678"|"Lansoprazole 15 MG Oral Tablet Dispersible"|"60899"|"Abdominal Pain"|"9"|"0.5625"

"159678"|"Lansoprazole 15 MG Oral Tablet Dispersible"|"64680"|"Chronic Reflux Esophagitis"|"3"|"0.5"

"159678"|"Lansoprazole 15 MG Oral Tablet Dispersible"|"64688"|"Esophageal Reflux"|"66"|"0.785714"

"159678"|"Lansoprazole 15 MG Oral Tablet Dispersible"|"65674"|"Nephrotic Syndrome"|"2"|"1"

"159678"|"Lansoprazole 15 MG Oral Tablet Dispersible"|"67695"|"Cystic Fibrosis"|"2"|"0.285714"

"159678"|"Lansoprazole 15 MG Oral Tablet Dispersible"|"76442"|"Failure To Thrive In Childhood"|"4"|"0.108108"

"159678"|"Lansoprazole 15 MG Oral Tablet Dispersible"|"87741"|"Abdominal Pain Around The Belly Button (Periumbilical)"|"3"|"1"

"159678"|"Lansoprazole 15 MG Oral Tablet Dispersible"|"87743"|"Diffuse Abdominal Pain"|"3"|"1"

"159678"|"Lansoprazole 15 MG Oral Tablet Dispersible"|"111520"|"Stridor"|"2"|"0.5"

"159678"|"Lansoprazole 15 MG Oral Tablet Dispersible"|"278172"|"Infant Feeding Problems"|"2"|"0.222222"

"159691"|"Pradaxa 150 MG Oral Capsule"|"62916"|"Atrial Fibrillation"|"50"|"0.694444"

"159691"|"Pradaxa 150 MG Oral Capsule"|"62917"|"Paroxysmal Atrial Fibrillation"|"3"|"0.428571"

"159691"|"Pradaxa 150 MG Oral Capsule"|"75356"|"Cerebral Embolism - With Cerebral Infarction"|"3"|"0.428571"

"159701"|"Lansoprazole 30 MG Oral Tablet Dispersible"|"60895"|"Vomiting (Symptom)"|"4"|"0.363636"

"159701"|"Lansoprazole 30 MG Oral Tablet Dispersible"|"60899"|"Abdominal Pain"|"16"|"0.516129"

"159701"|"Lansoprazole 30 MG Oral Tablet Dispersible"|"64678"|"Esophagitis"|"2"|"1"

"159701"|"Lansoprazole 30 MG Oral Tablet Dispersible"|"64680"|"Chronic Reflux Esophagitis"|"5"|"0.714286"

"159701"|"Lansoprazole 30 MG Oral Tablet Dispersible"|"64688"|"Esophageal Reflux"|"36"|"0.857143"

"159701"|"Lansoprazole 30 MG Oral Tablet Dispersible"|"64748"|"Gastroparesis"|"2"|"0.4"

"159701"|"Lansoprazole 30 MG Oral Tablet Dispersible"|"76976"|"Helicobacter Pylori (H. Pylori) Infection"|"2"|"0.5"

"159701"|"Lansoprazole 30 MG Oral Tablet Dispersible"|"87702"|"Nausea With Vomiting"|"2"|"1"

"159701"|"Lansoprazole 30 MG Oral Tablet Dispersible"|"87736"|"Abdominal Pain In The Central Upper Belly (Epigastric)"|"5"|"0.833333"

"159701"|"Lansoprazole 30 MG Oral Tablet Dispersible"|"87743"|"Diffuse Abdominal Pain"|"9"|"0.818182"

"159701"|"Lansoprazole 30 MG Oral Tablet Dispersible"|"87744"|"Abdominal Pain In Multiple Locations"|"3"|"0.6"

"159701"|"Lansoprazole 30 MG Oral Tablet Dispersible"|"116196"|"Abdomen Tenderness Direct Epigastric"|"2"|"1"

"159994"|"Kombiglyze XR 2.5-1000 MG Oral Tablet Extended Release 24 Hour"|"69381"|"Type II Diabetes Mellitus"|"7"|"0.875"

"159994"|"Kombiglyze XR 2.5-1000 MG Oral Tablet Extended Release 24 Hour"|"69402"|"Diabetes Mellitus Poorly Controlled"|"2"|"0.333333"

"160013"|"Pradaxa 75 MG Oral Capsule"|"62916"|"Atrial Fibrillation"|"2"|"1"

"160094"|"OneTouch Delica Lancets Miscellaneous"|"69380"|"Diabetes Mellitus"|"6"|"0.6"

"160094"|"OneTouch Delica Lancets Miscellaneous"|"69381"|"Type II Diabetes Mellitus"|"3"|"0.333333"

"160094"|"OneTouch Delica Lancets Miscellaneous"|"69387"|"Type I Diabetes Mellitus"|"2"|"0.666667"

"160094"|"OneTouch Delica Lancets Miscellaneous"|"69402"|"Diabetes Mellitus Poorly Controlled"|"2"|"0.285714"

"160317"|"Levocetirizine Dihydrochloride 5 MG Oral Tablet"|"62586"|"Chronic Maxillary Sinusitis"|"2"|"0.5"

"160317"|"Levocetirizine Dihydrochloride 5 MG Oral Tablet"|"62598"|"Allergic Rhinitis"|"30"|"0.810811"

"160327"|"Lo Loestrin Fe 1 MG-10 MCG / 10 MCG Oral Tablet"|"187792"|"Gynecologic Services Contraceptive Management"|"2"|"0.5"

"160327"|"Lo Loestrin Fe 1 MG-10 MCG / 10 MCG Oral Tablet"|"250989"|"Oral Contraceptives"|"4"|"1"

"160334"|"Donepezil HCl 10 MG Oral Tablet"|"61048"|"Memory Lapses Or Loss"|"43"|"0.693548"

"160334"|"Donepezil HCl 10 MG Oral Tablet"|"75020"|"Alzheimer's Disease"|"27"|"0.509434"

"160334"|"Donepezil HCl 10 MG Oral Tablet"|"75032"|"Vascular Dementia"|"10"|"0.526316"

"160334"|"Donepezil HCl 10 MG Oral Tablet"|"75080"|"Parkinson's Disease"|"3"|"0.176471"

"160334"|"Donepezil HCl 10 MG Oral Tablet"|"163751"|"Cognitive Functions Current Level Impaired"|"4"|"0.666667"

"160334"|"Donepezil HCl 10 MG Oral Tablet"|"251600"|"Dementia"|"53"|"0.576087"

"160334"|"Donepezil HCl 10 MG Oral Tablet"|"252573"|"Frontotemporal Dementia"|"3"|"0.5"

"160334"|"Donepezil HCl 10 MG Oral Tablet"|"252575"|"Dementia With Lewy Bodies"|"5"|"0.833333"

"160334"|"Donepezil HCl 10 MG Oral Tablet"|"275483"|"Dementia Of Alzheimer's Type"|"2"|"0.333333"

"160334"|"Donepezil HCl 10 MG Oral Tablet"|"275500"|"Cognitive Disorder"|"3"|"0.6"

"160339"|"Donepezil HCl 5 MG Oral Tablet Dispersible"|"251600"|"Dementia"|"2"|"1"

"160341"|"Donepezil HCl 5 MG Oral Tablet"|"61048"|"Memory Lapses Or Loss"|"51"|"0.822581"

"160341"|"Donepezil HCl 5 MG Oral Tablet"|"75020"|"Alzheimer's Disease"|"8"|"0.421053"

"160341"|"Donepezil HCl 5 MG Oral Tablet"|"75026"|"Alzheimer's Disease Late Onset"|"2"|"1"

"160341"|"Donepezil HCl 5 MG Oral Tablet"|"75032"|"Vascular Dementia"|"3"|"0.428571"

"160341"|"Donepezil HCl 5 MG Oral Tablet"|"75371"|"Late CVD Effects: Aphasia"|"2"|"0.666667"

"160341"|"Donepezil HCl 5 MG Oral Tablet"|"163751"|"Cognitive Functions Current Level Impaired"|"3"|"0.6"

"160341"|"Donepezil HCl 5 MG Oral Tablet"|"251600"|"Dementia"|"27"|"0.54"

"160341"|"Donepezil HCl 5 MG Oral Tablet"|"252575"|"Dementia With Lewy Bodies"|"6"|"1"

"160341"|"Donepezil HCl 5 MG Oral Tablet"|"275500"|"Cognitive Disorder"|"4"|"0.8"

"160341"|"Donepezil HCl 5 MG Oral Tablet"|"296950"|"Memory Lapses Or Loss Worsening"|"2"|"1"

"160345"|"Corvite Fe Oral Tablet"|"66444"|"Pregnancy Complicated By Anemia"|"5"|"1"

"160403"|"Zolpidem Tartrate 12.5 MG Oral Tablet Extended Release"|"61108"|"Insomnia"|"24"|"0.857143"

"160403"|"Zolpidem Tartrate 12.5 MG Oral Tablet Extended Release"|"76357"|"Major Depression, Recurrent"|"2"|"0.5"

"160403"|"Zolpidem Tartrate 12.5 MG Oral Tablet Extended Release"|"275543"|"Psychophysiological Insomnia"|"2"|"1"

"160403"|"Zolpidem Tartrate 12.5 MG Oral Tablet Extended Release"|"275604"|"Depression With Anxiety"|"2"|"0.666667"

"160557"|"Loratadine 5 MG/5ML Oral Solution"|"62598"|"Allergic Rhinitis"|"5"|"0.833333"

"160563"|"Nuedexta 20-10 MG Oral Capsule"|"75367"|"Pseudobulbar Palsy"|"3"|"1"

"160649"|"Amlodipine Besy-Benazepril HCl 10-40 MG Oral Capsule"|"63467"|"Hypertension"|"7"|"0.411765"

"160649"|"Amlodipine Besy-Benazepril HCl 10-40 MG Oral Capsule"|"63468"|"Essential Hypertension"|"7"|"0.777778"

"160649"|"Amlodipine Besy-Benazepril HCl 10-40 MG Oral Capsule"|"63470"|"Benign Essential Hypertension"|"2"|"0.285714"

"160654"|"Safyral 3-0.03-0.451 MG Oral Tablet"|"187792"|"Gynecologic Services Contraceptive Management"|"2"|"1"

"160654"|"Safyral 3-0.03-0.451 MG Oral Tablet"|"250989"|"Oral Contraceptives"|"2"|"0.666667"

"160797"|"HydrOXYzine HCl 10 MG/5ML Oral Solution"|"278350"|"Eczema"|"6"|"0.857143"

"161242"|"Fexofenadine-Pseudoephedrine 180-240 MG TB24"|"62598"|"Allergic Rhinitis"|"4"|"0.8"

"161534"|"Sodium Chloride (Inhalant) 7 % Inhalation Nebulization Solution"|"67695"|"Cystic Fibrosis"|"4"|"1"

"161592"|"Allegra-D Allergy & Congestion 180-240 MG Oral Tablet Extended Release 24 Hour"|"62598"|"Allergic

Rhinitis|"3|"0.75"

"161600|"Allegra Allergy Childrens 30 MG Oral Tablet Dispersible|"62598|"Allergic Rhinitis|"3|"1"

"161610|"Allegra Allergy Childrens 30 MG/5ML Oral Suspension|"62598|"Allergic Rhinitis|"9|"0.9"

"161617|"Allegra Allergy 60 MG Oral Tablet|"62598|"Allergic Rhinitis|"3|"0.6"

"161635|"Allegra Allergy Childrens 30 MG Oral Tablet|"62598|"Allergic Rhinitis|"2|"1"

"162007|"AndroGel Pump 1.25 GM/ACT (1%) Transdermal Gel|"69214|"Hypopituitarism|"2|"1"

"162007|"AndroGel Pump 1.25 GM/ACT (1%) Transdermal Gel|"69588|"Hypogonadism|"2|"0.666667"
